# Supplementary material for: Genome-wide DNA Methylation in Treatment-naïve Ulcerative Colitis
Source: PubMed Central journal article supplement — J Crohns Colitis. 2018 Aug 22;12(11):1338–47. doi: 10.1093/ecco-jcc/jjy117 (PMC6236200; doi:10.1093/ecco-jcc/jjy117), 2018-08-22

**Supplementary Data 3.** Relationship between the raw methylation data per sample, average difference between groups, and relationship to the TSS and transcript expression.

Top left panel: The Y axis represents difference in relative methylation between the ulcerative colitis and normal groups. The X-axis shows the position relative to the TSS site defined as 0. Negative numbers are upstream of TSS, positive numbers downstream.

Top right panel: Legend of top left panel.

Bottom left panel: The raw methylation data per patient. The X scale is the same as the top left panel. The Y-axis shows relative methylation, 1 for 100% methylated, 0 for not methylated, 0.5 for 50% methylated.

A point represent the relative methylation value for a sample at a particular location. Dotted lines connect same samples between positions. Red points and dotted lines are from Ulcerative Colitis samples, blue from normal samples.

Bottom right panel: Shows a boxplot of the normalized log<sub>2</sub> values of the transcript corresponding to the promoter.

ACAP1 average UC-N %methylation max=-1.65% min=-22.07%

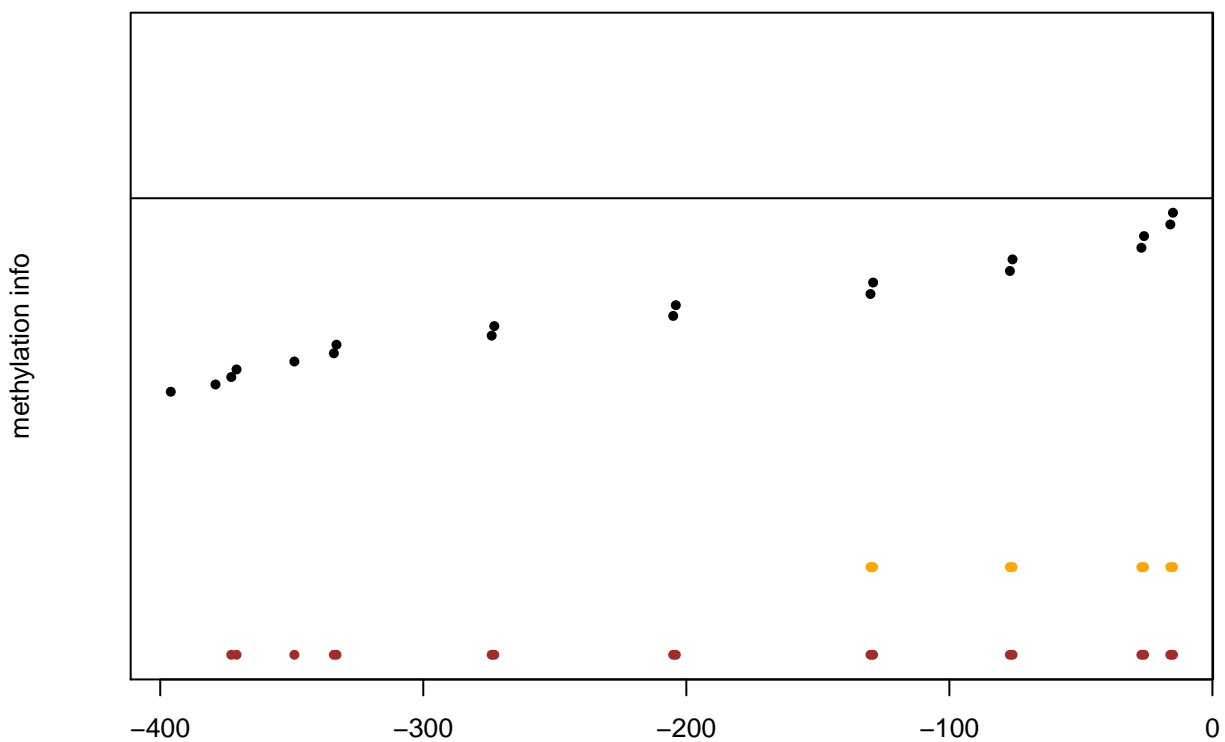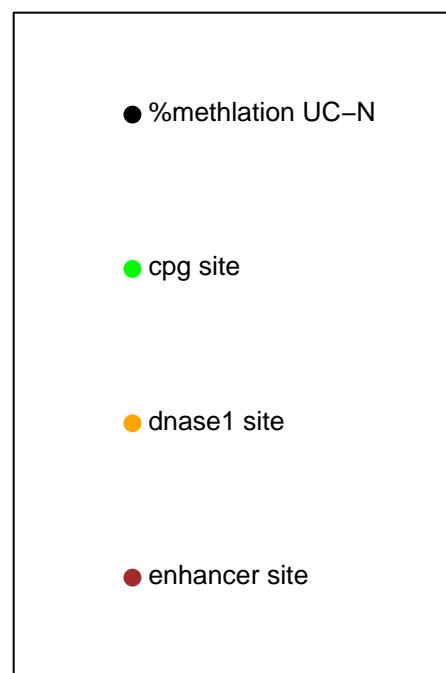

ACAP1 raw %methylation, red=UC, blue=Normal

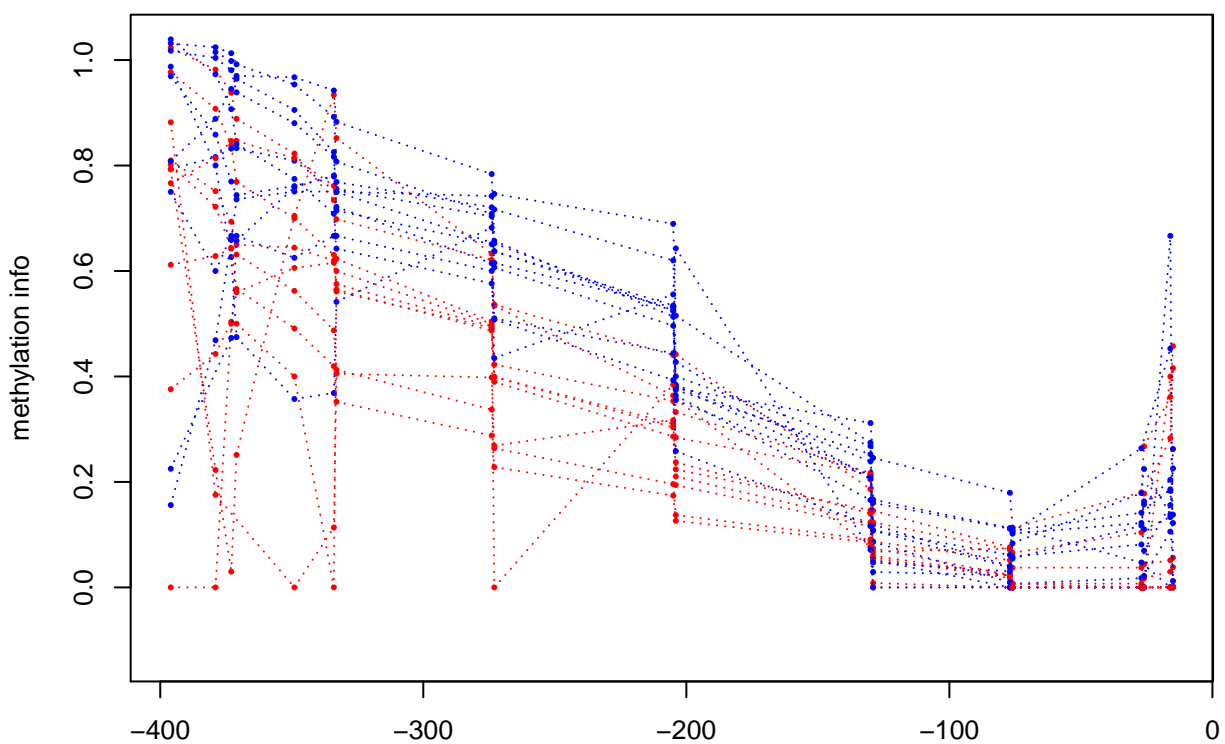

RNAseq logFC(UC-N)= 1.31

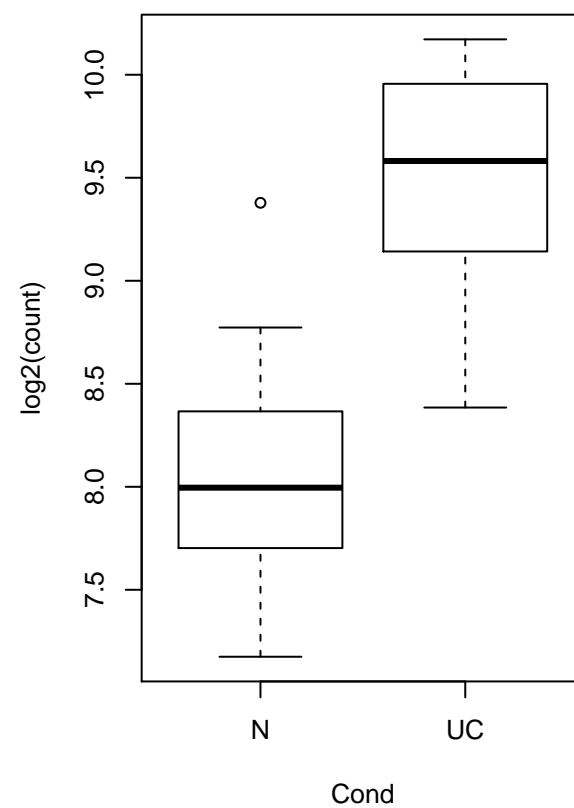

ACKR1 average UC-N %methylation max=-0.34% min=-37.21%

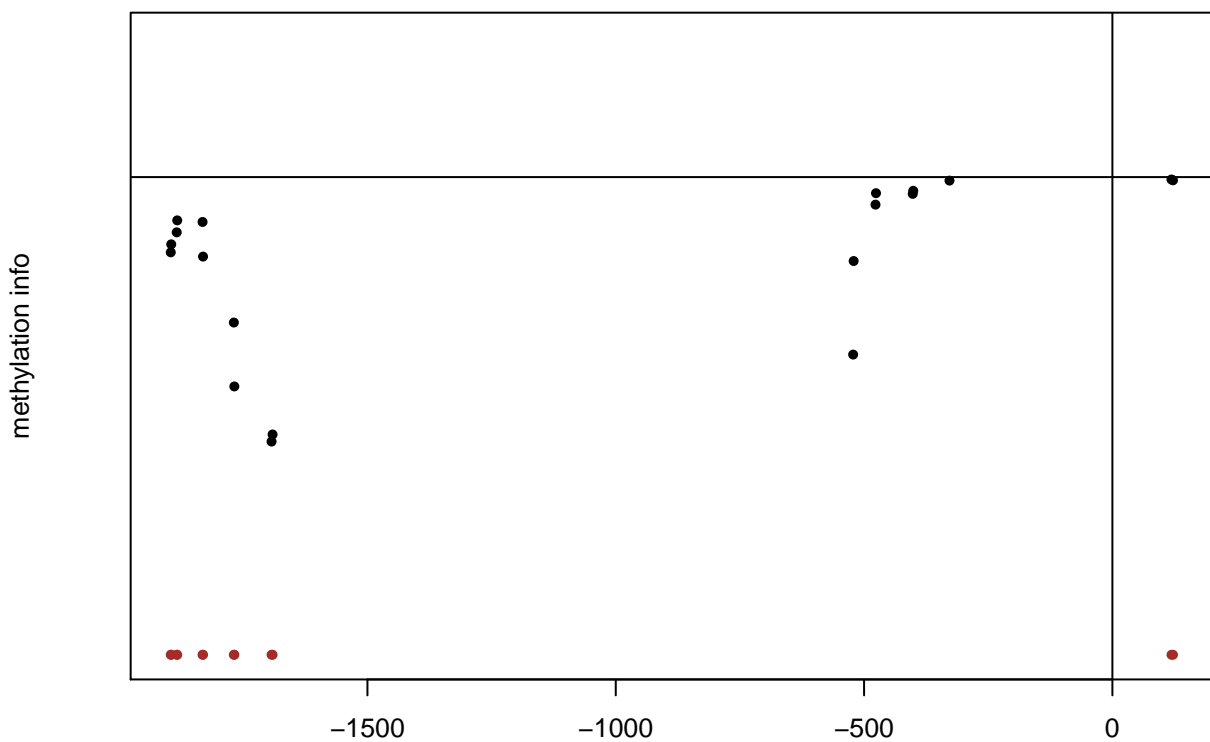

ACKR1 raw %methylation, red=UC, blue=Normal

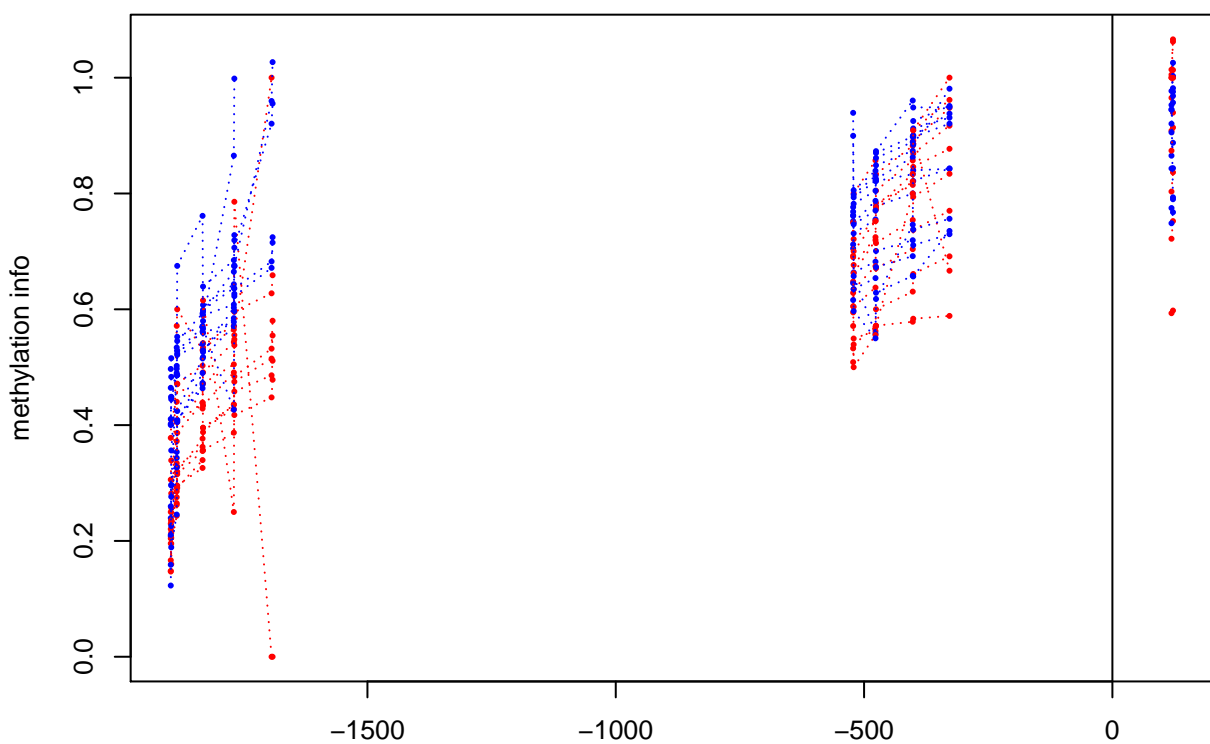

RNAseq logFC(UC-N)= 1.14

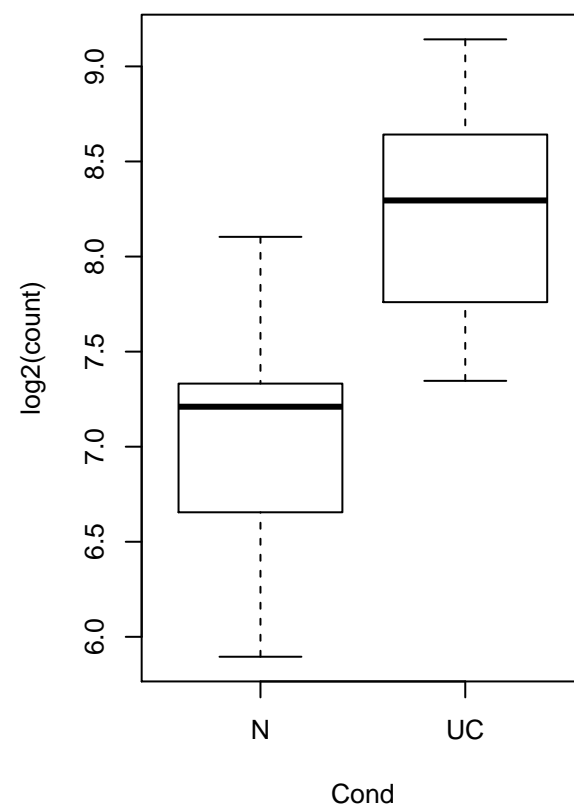

ADGRE1 average UC-N %methylation max=-4.33% min=-31.52%

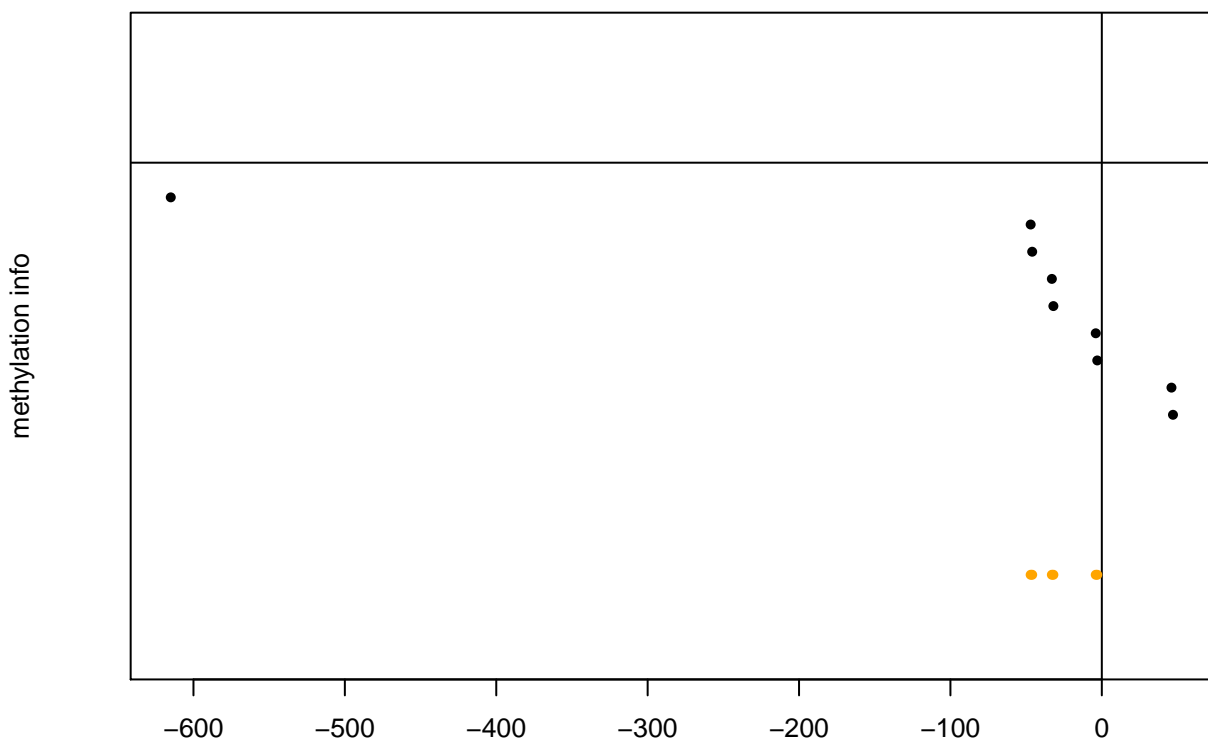

ADGRE1 raw %methylation, red=UC, blue=Normal

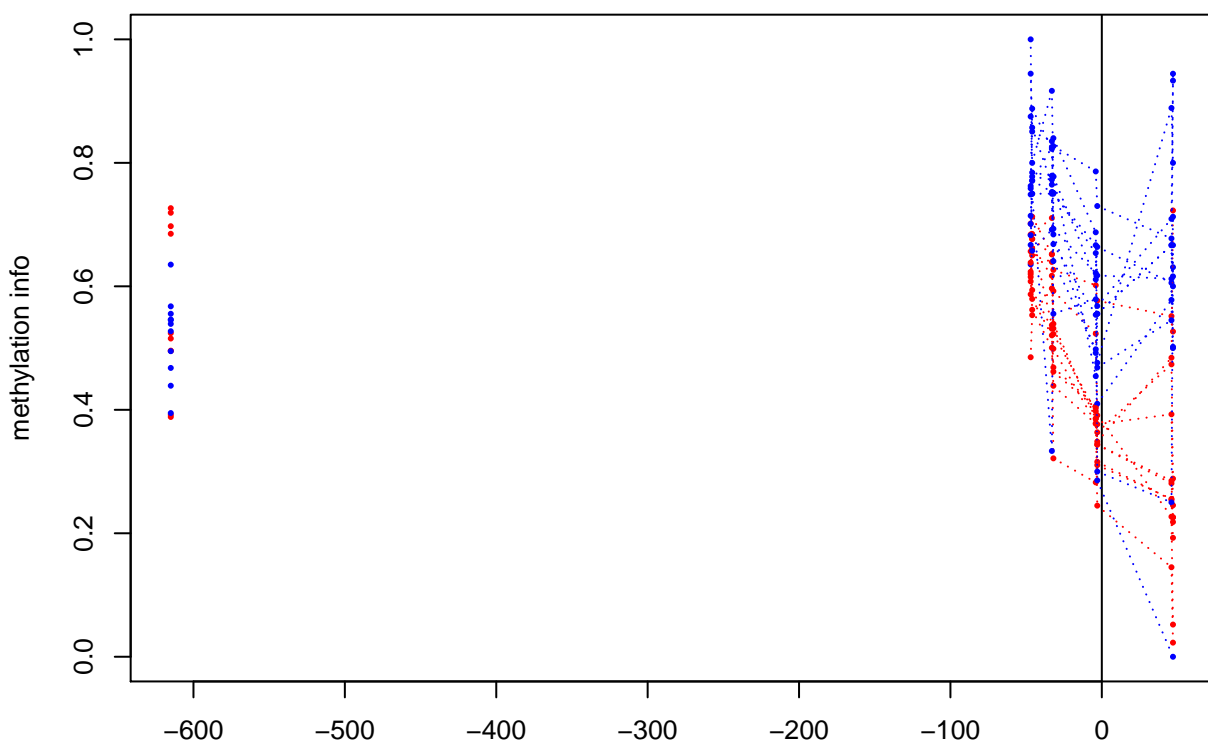

RNAseq logFC(UC-N)= 1.21

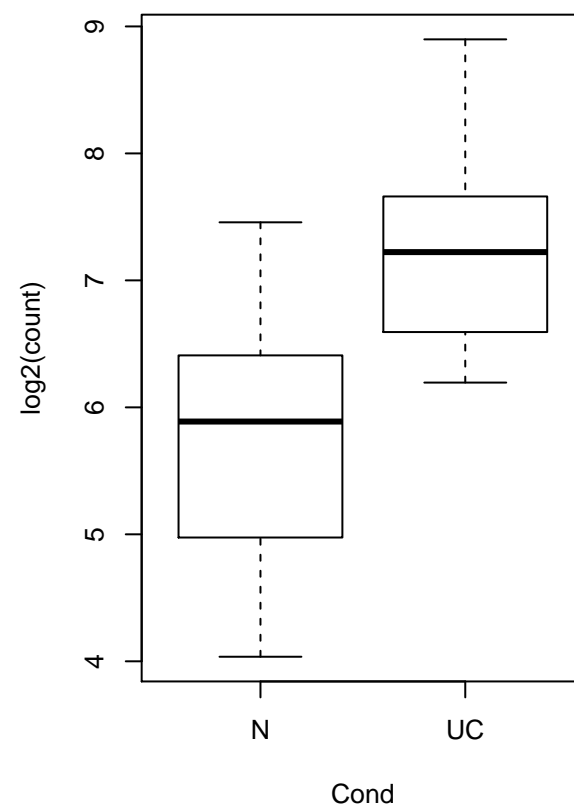

ADGRE2 average UC-N %methylation max=-5.85% min=-31.52%

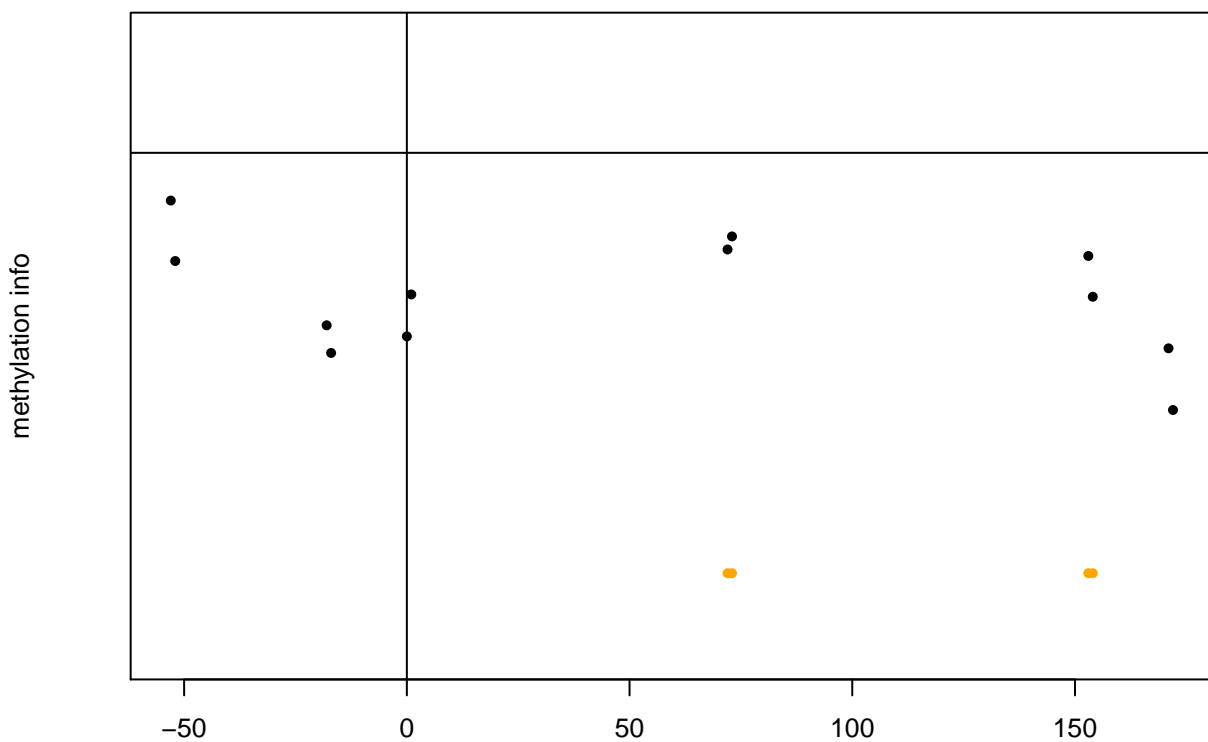

ADGRE2 raw %methylation, red=UC, blue=Normal

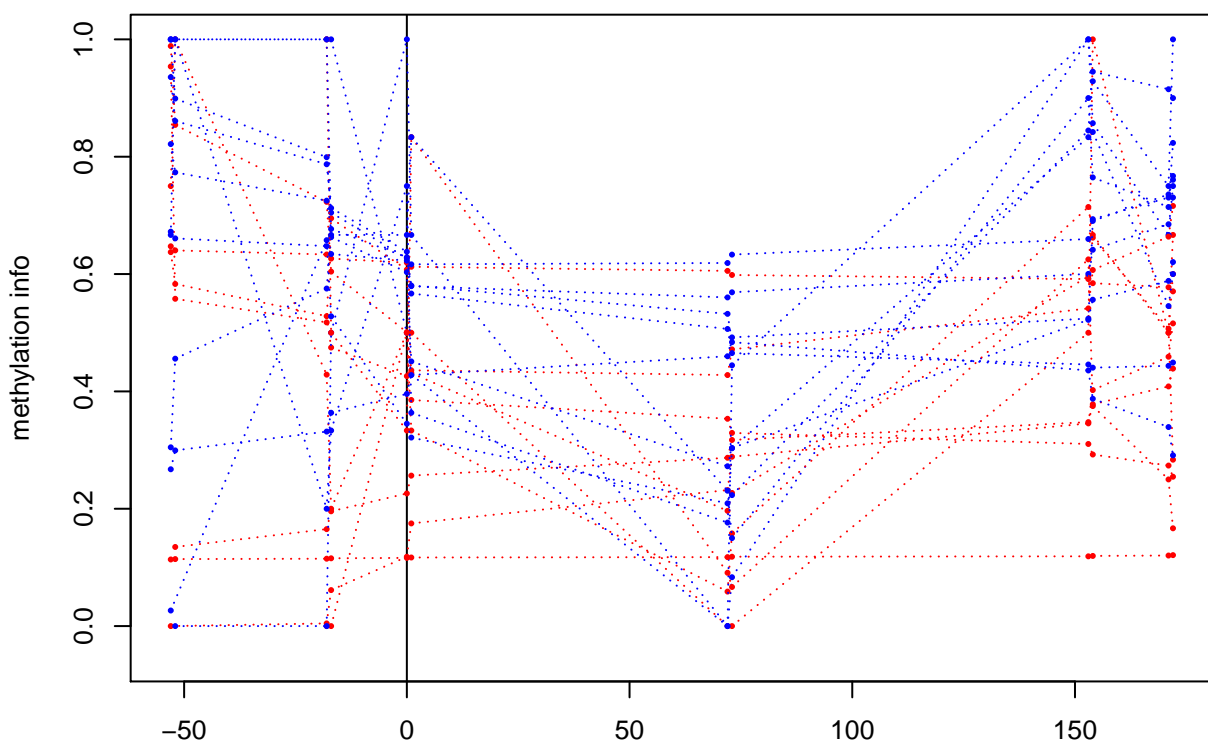

RNAseq logFC(UC-N)= 1.73

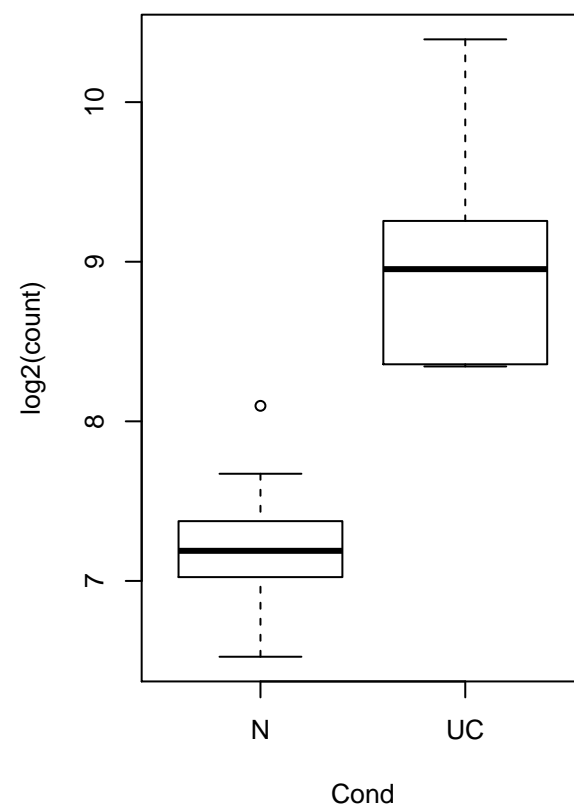

ADGRG5 average UC-N %methylation max=-14.26% min=-34.46%

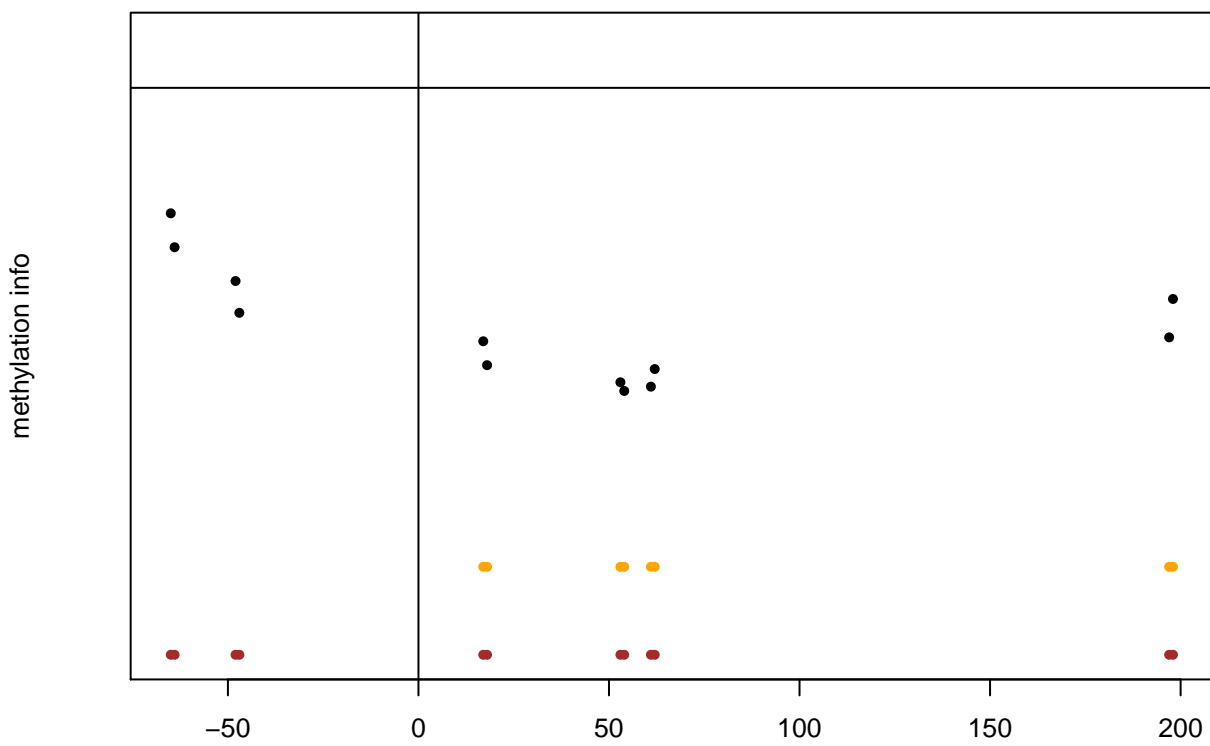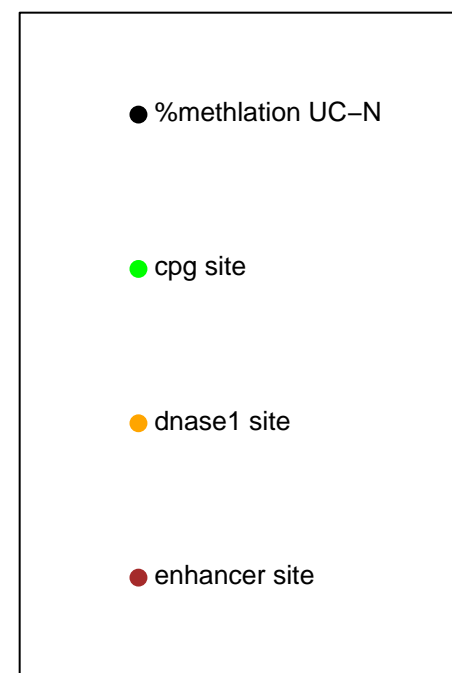

ADGRG5 raw %methylation, red=UC, blue=Normal

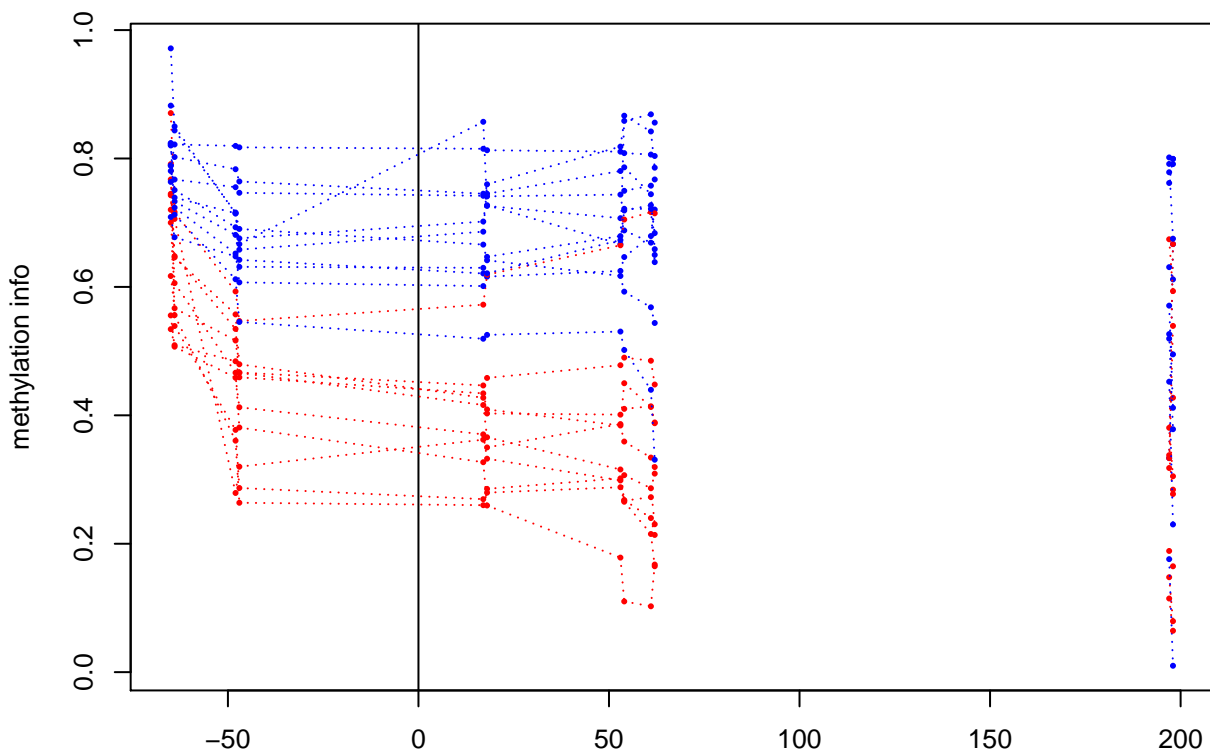

RNAseq logFC(UC-N)= 1.54

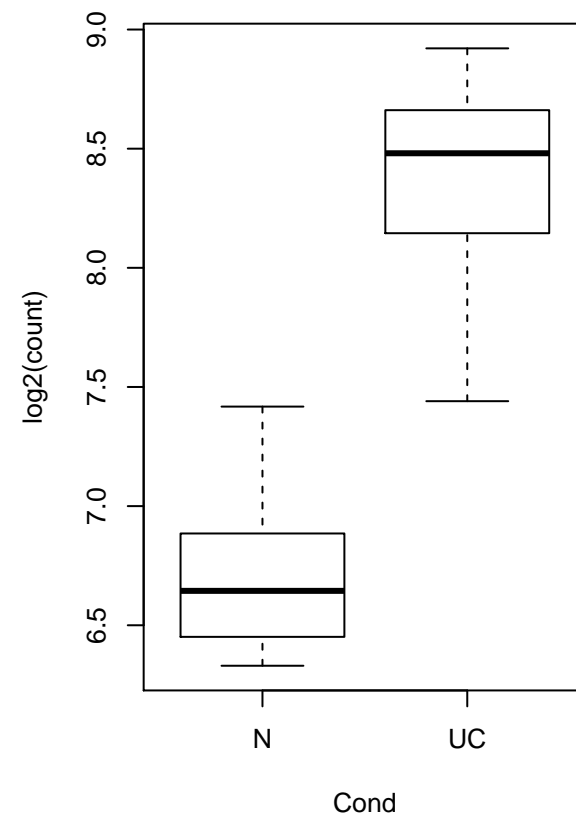

ADH1C average UC-N %methylation max=12.93% min=3.83%

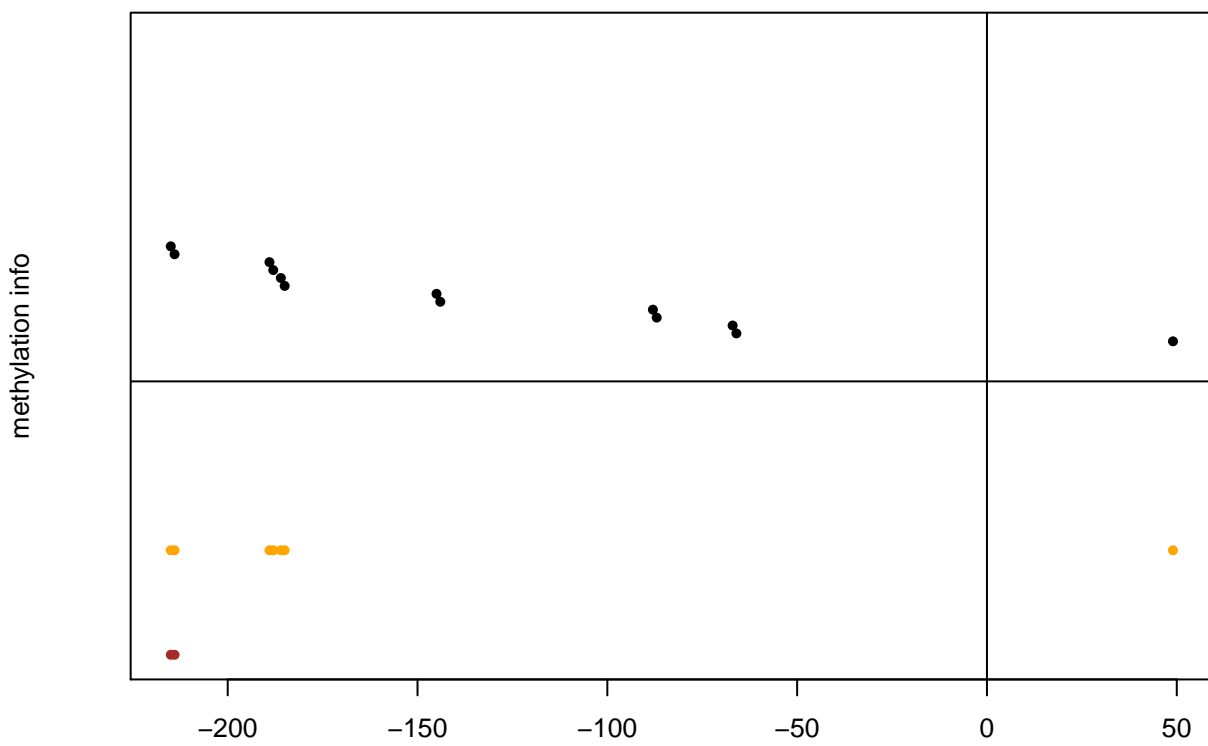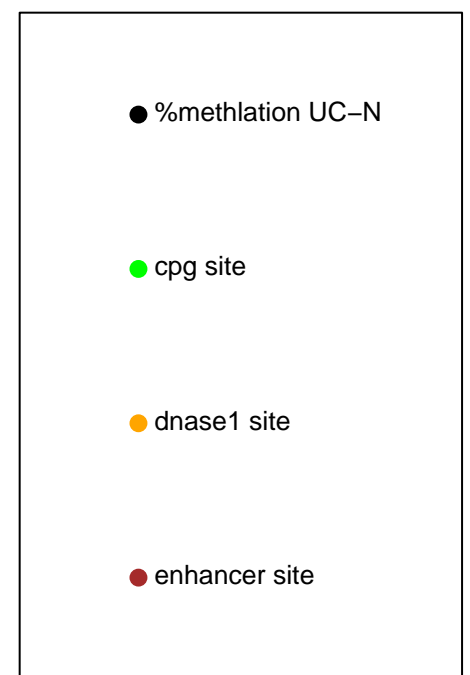

ADH1C raw %methylation, red=UC, blue=Normal

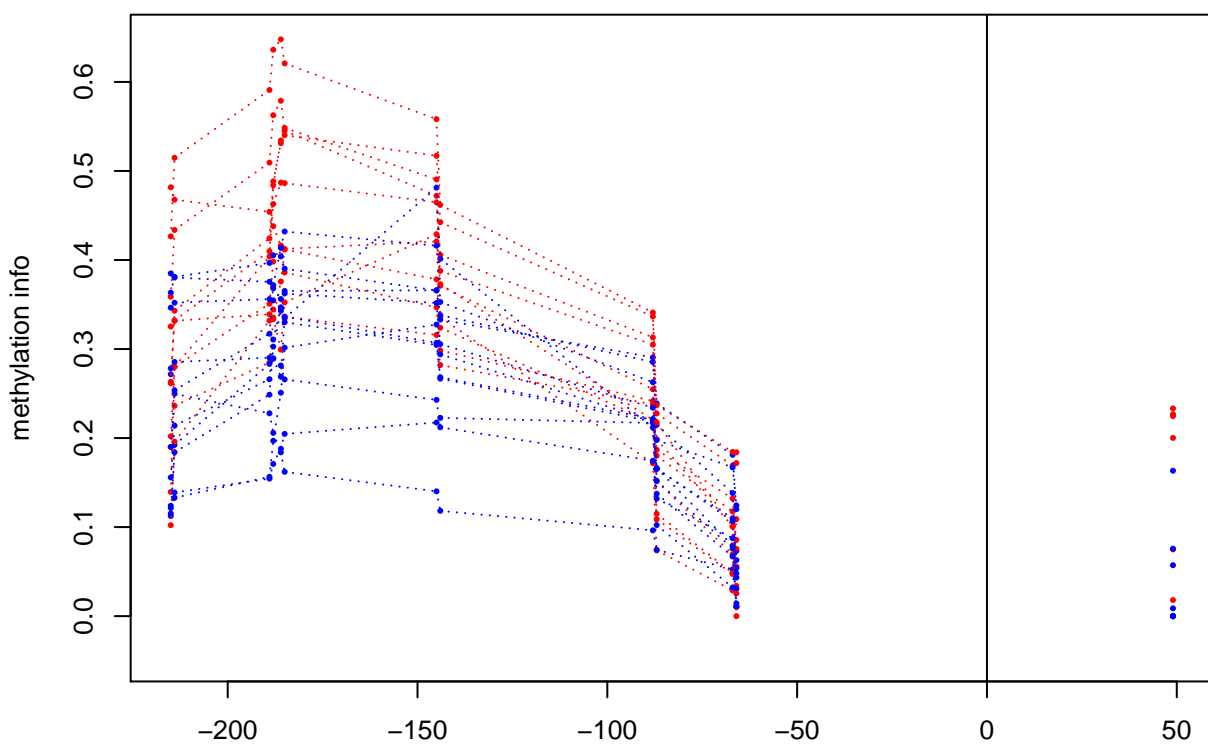

RNAseq logFC(UC-N)= -1.25

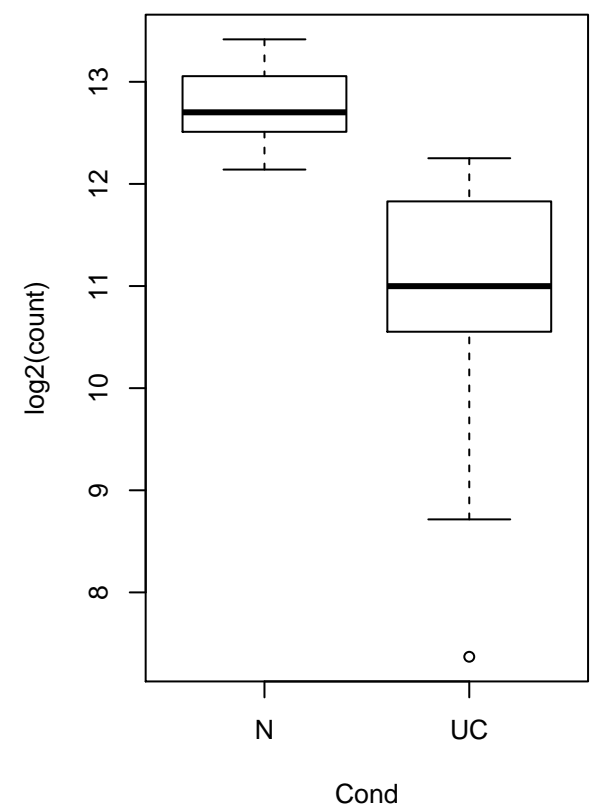

ADH6 average UC-N %methylation max=21.6% min=7.39%

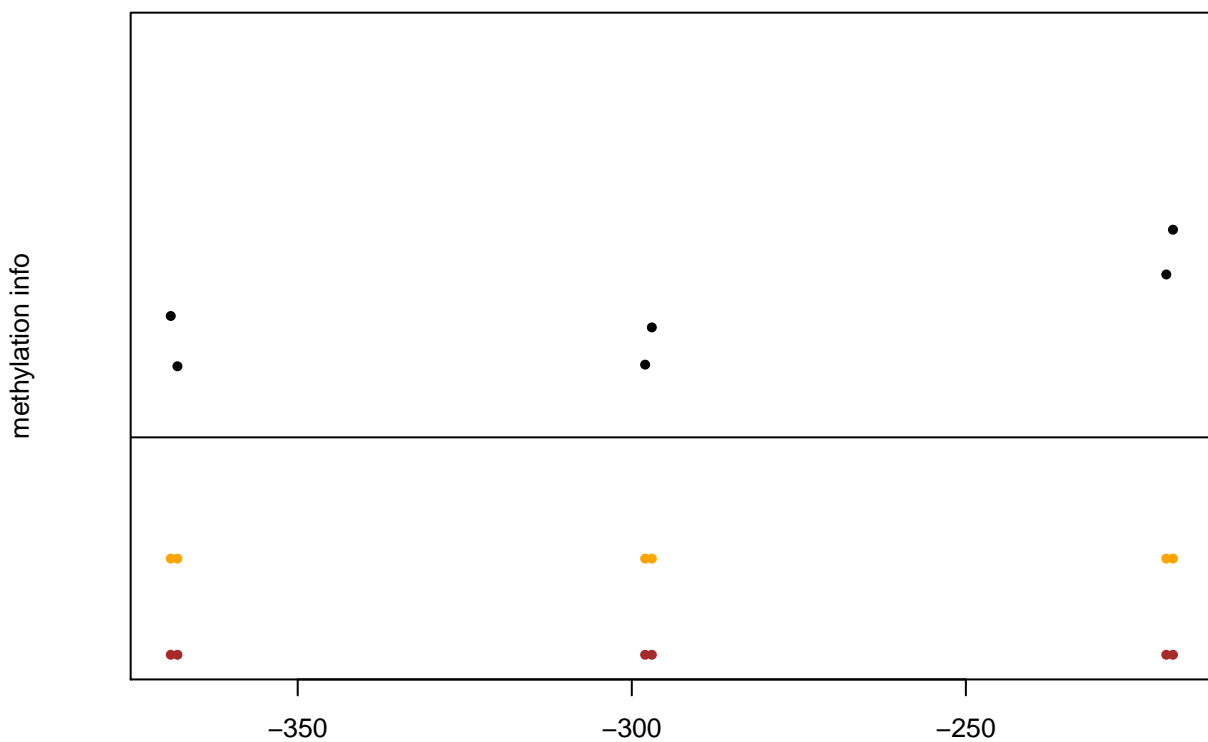

ADH6 raw %methylation, red=UC, blue=Normal

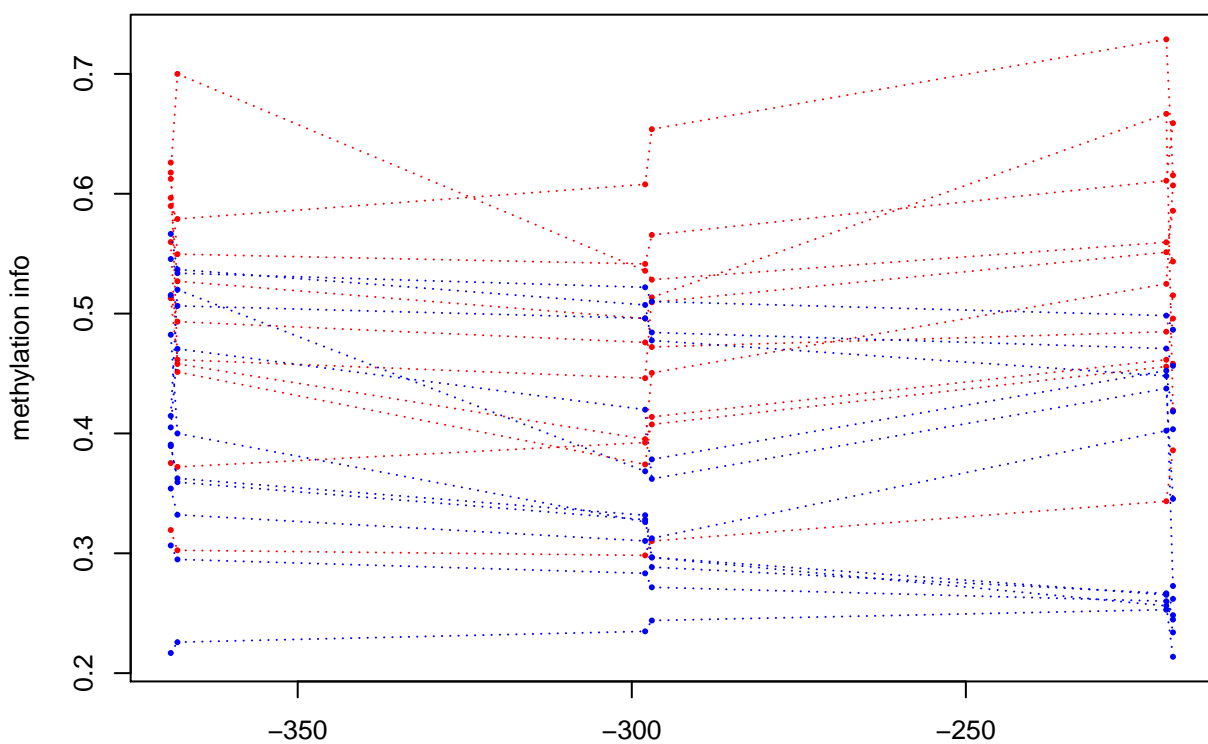

RNAseq logFC(UC-N)= -1.11

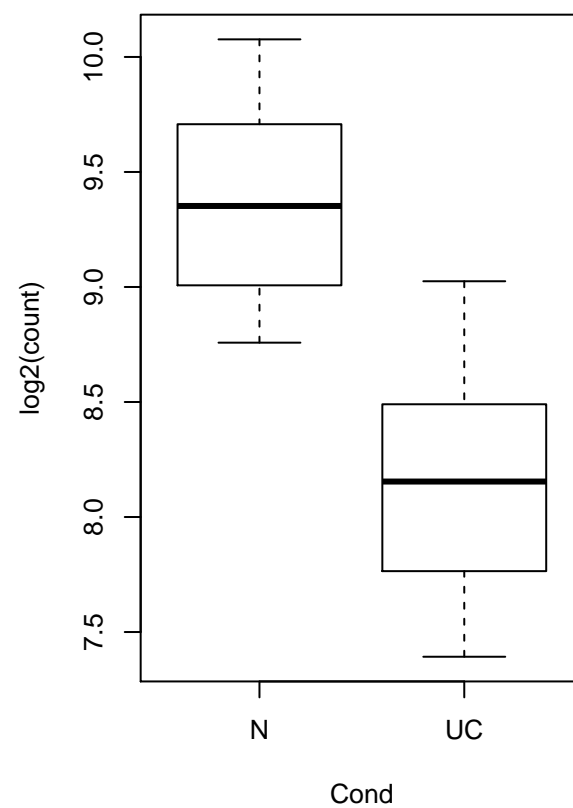



ADIRF average UC-N %methylation max=13.83% min=-11.74%

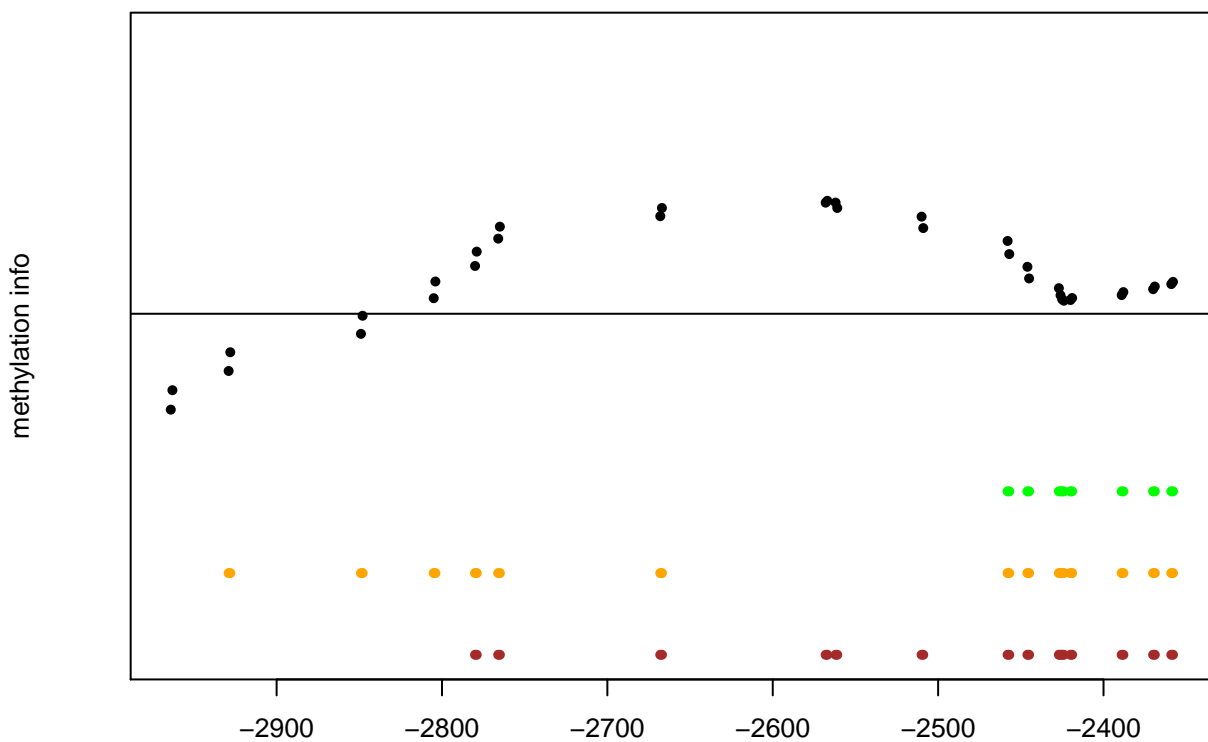

ADIRF raw %methylation, red=UC, blue=Normal

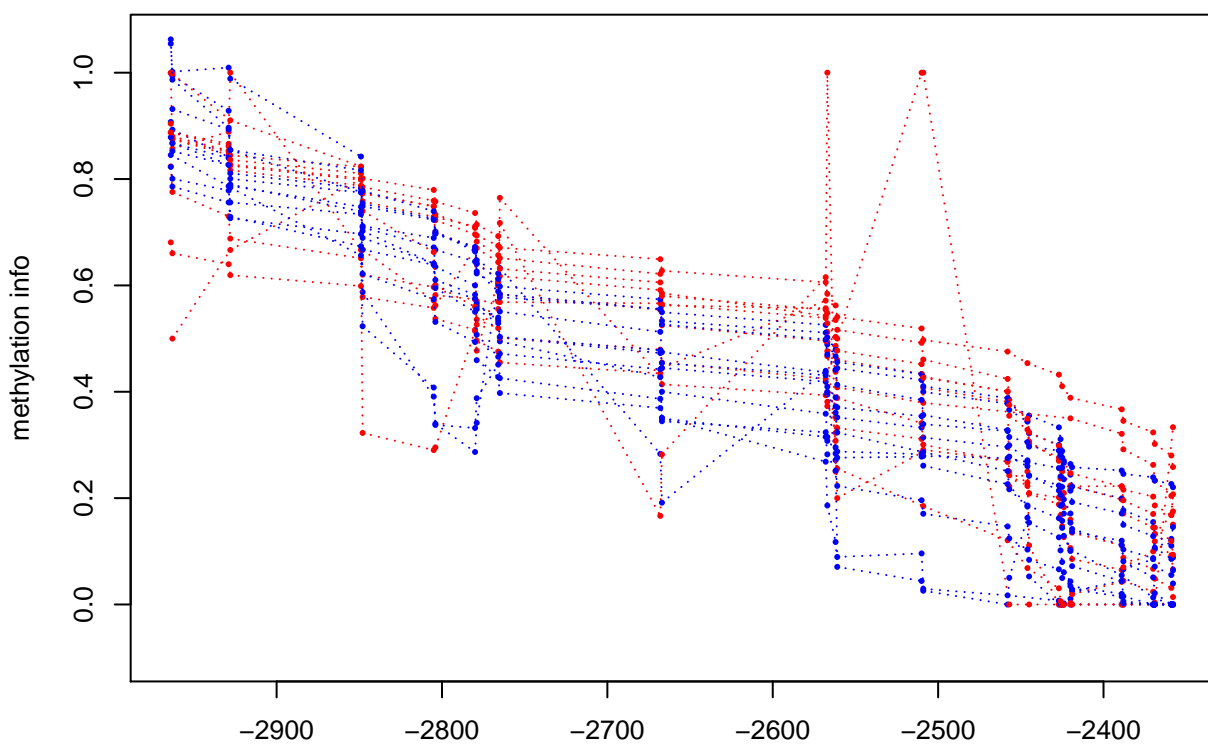

RNAseq logFC(UC-N)= -1.88

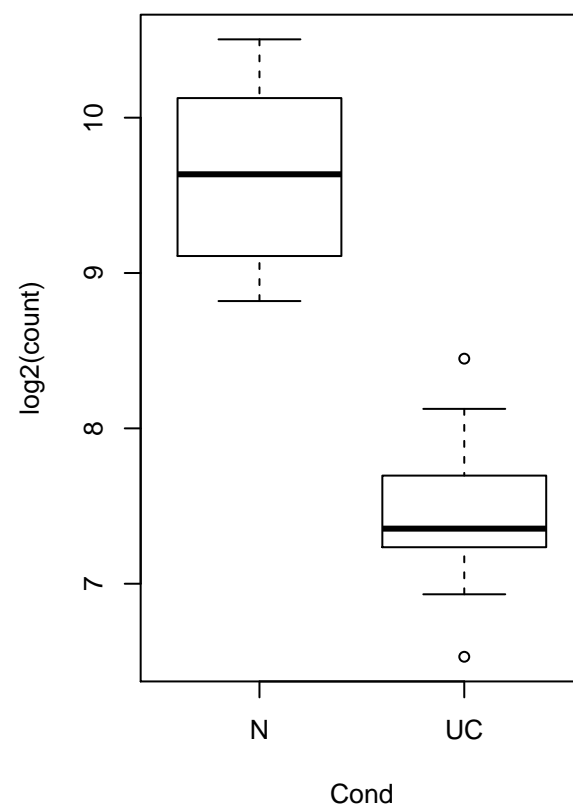

AGMO average UC-N %methylation max=39.88% min=-8.53%

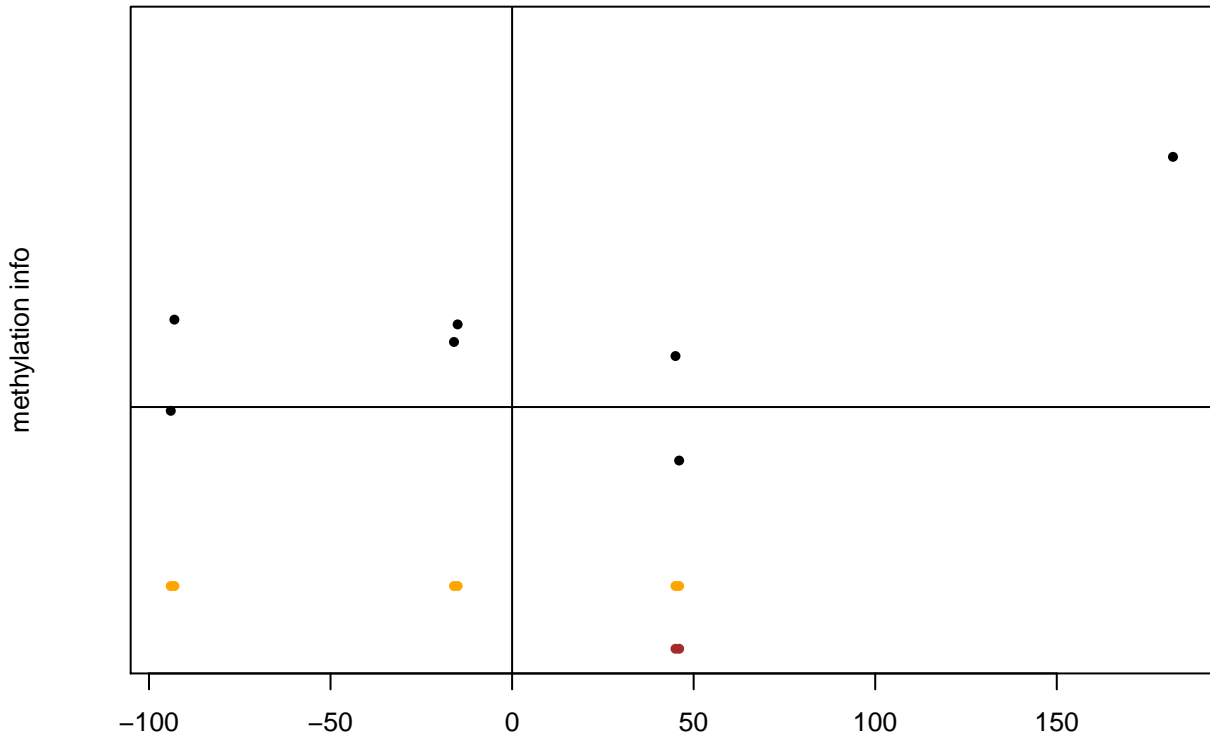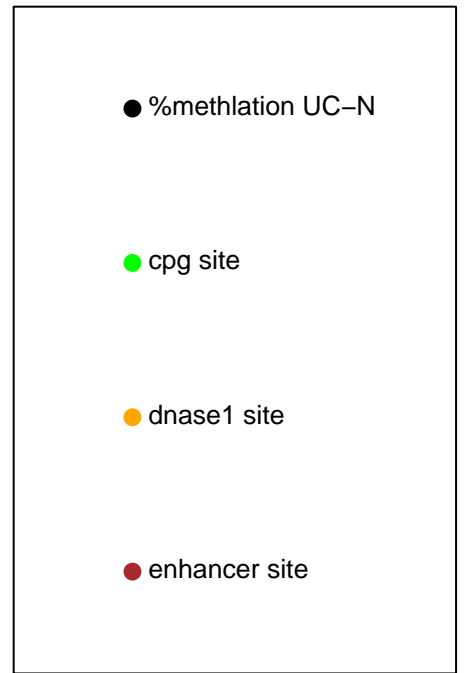

AGMO raw %methylation, red=UC, blue=Normal

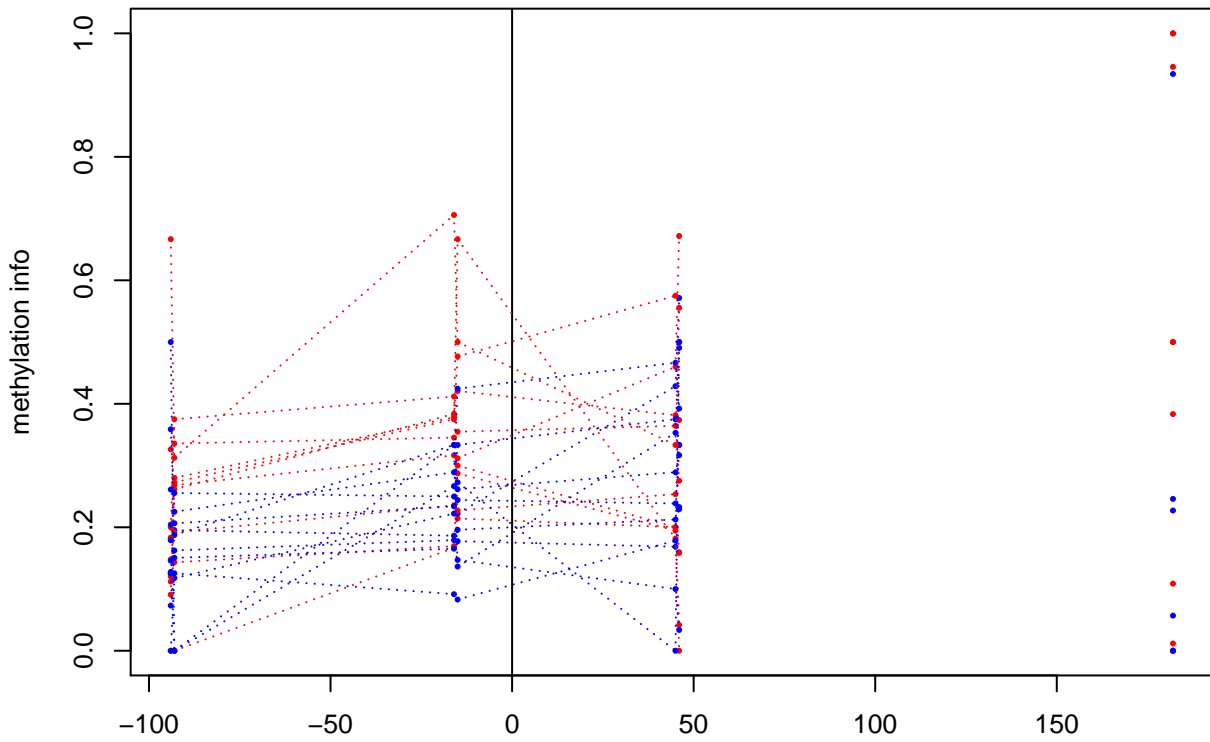

RNAseq logFC(UC-N)= -1.57

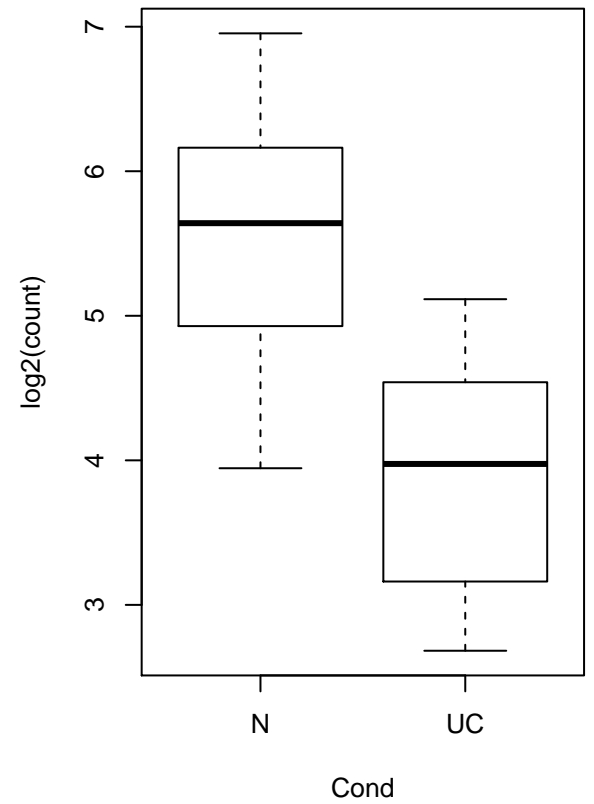

ALOX12B average UC-N %methylation max=5.48% min=-0.12%

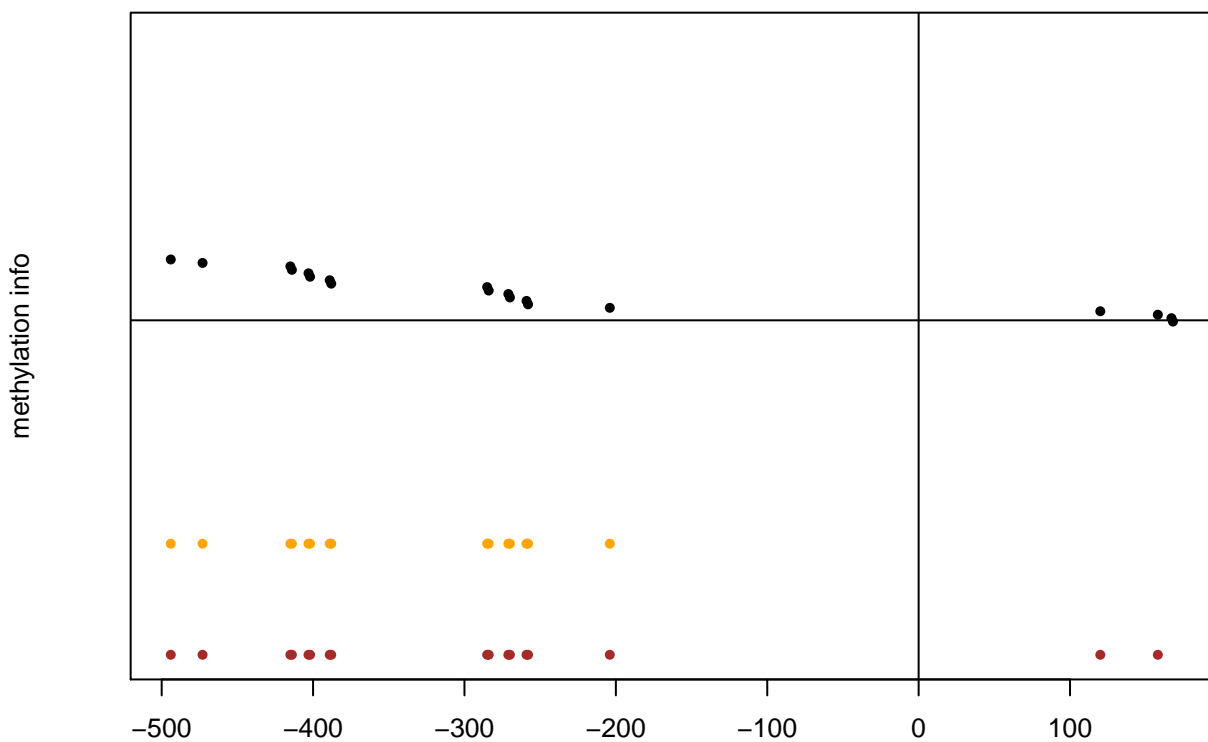

ALOX12B raw %methylation, red=UC, blue=Normal

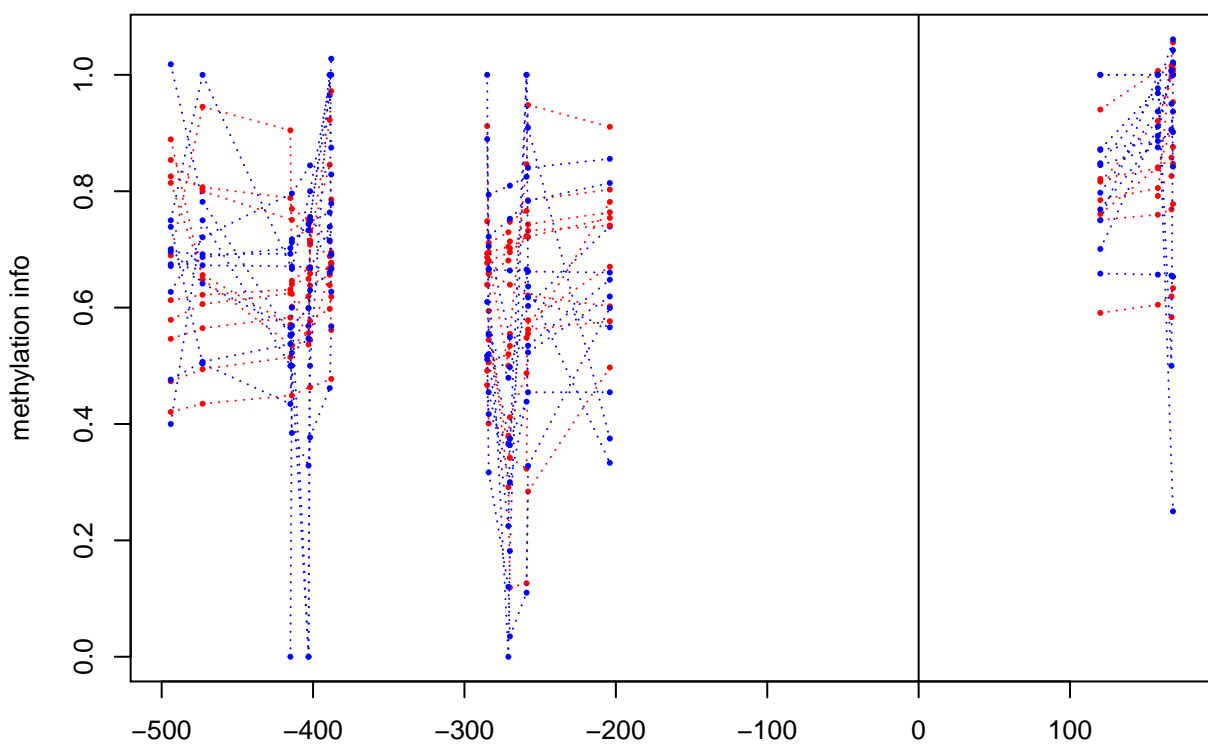

RNAseq logFC(UC-N) = -1.47

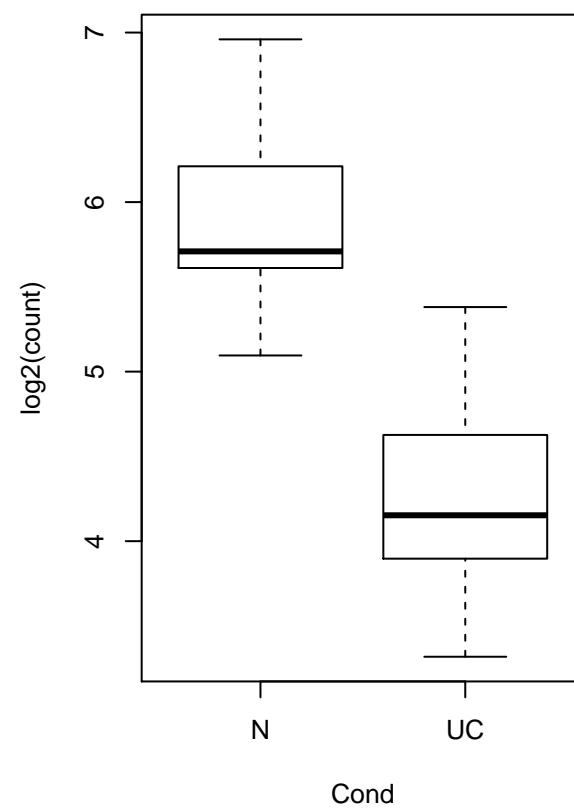

ALPI average UC-N %methylation max=19.58% min=-15.52%

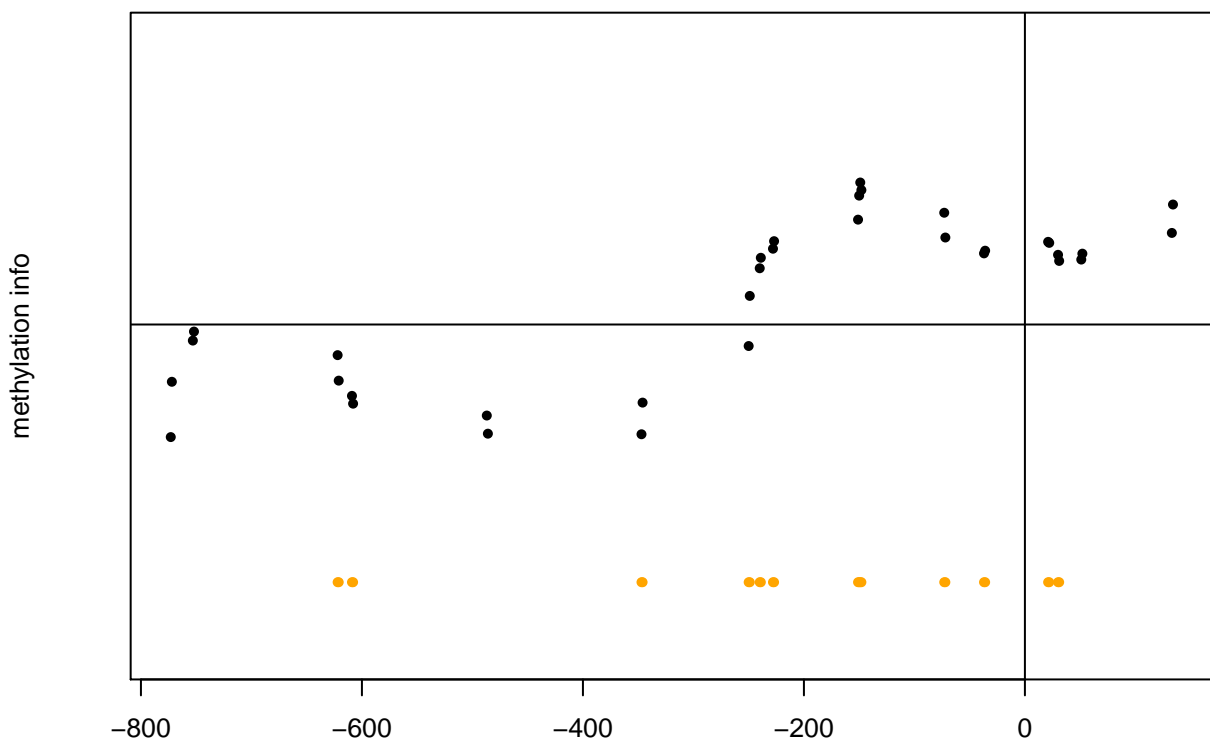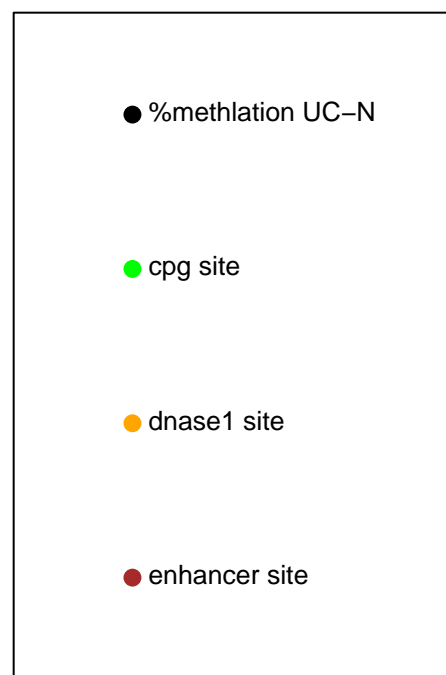

ALPI raw %methylation, red=UC, blue=Normal

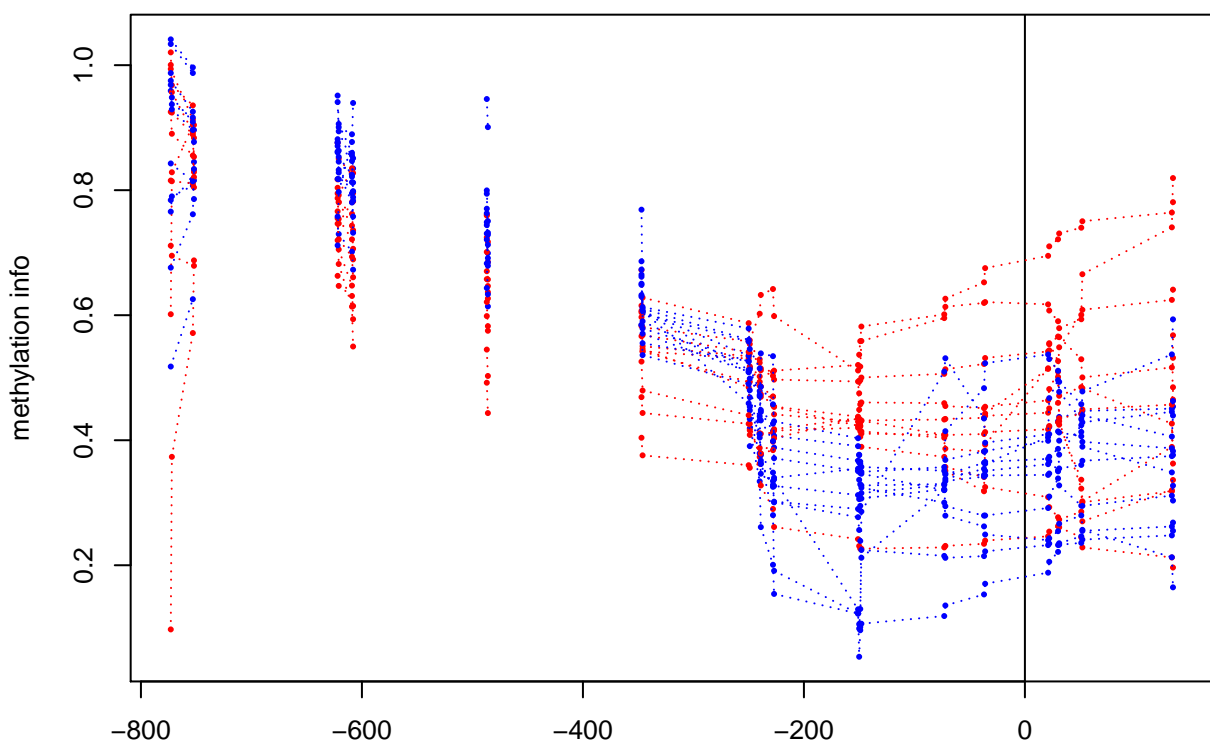

RNAseq logFC(UC-N) = -1.91

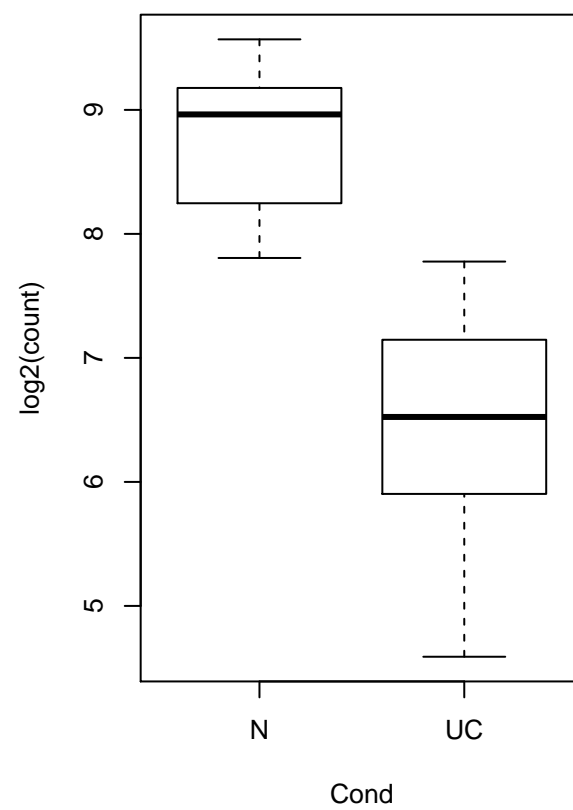

ALPK2 average UC-N %methylation max=-0.21% min=-10.02%

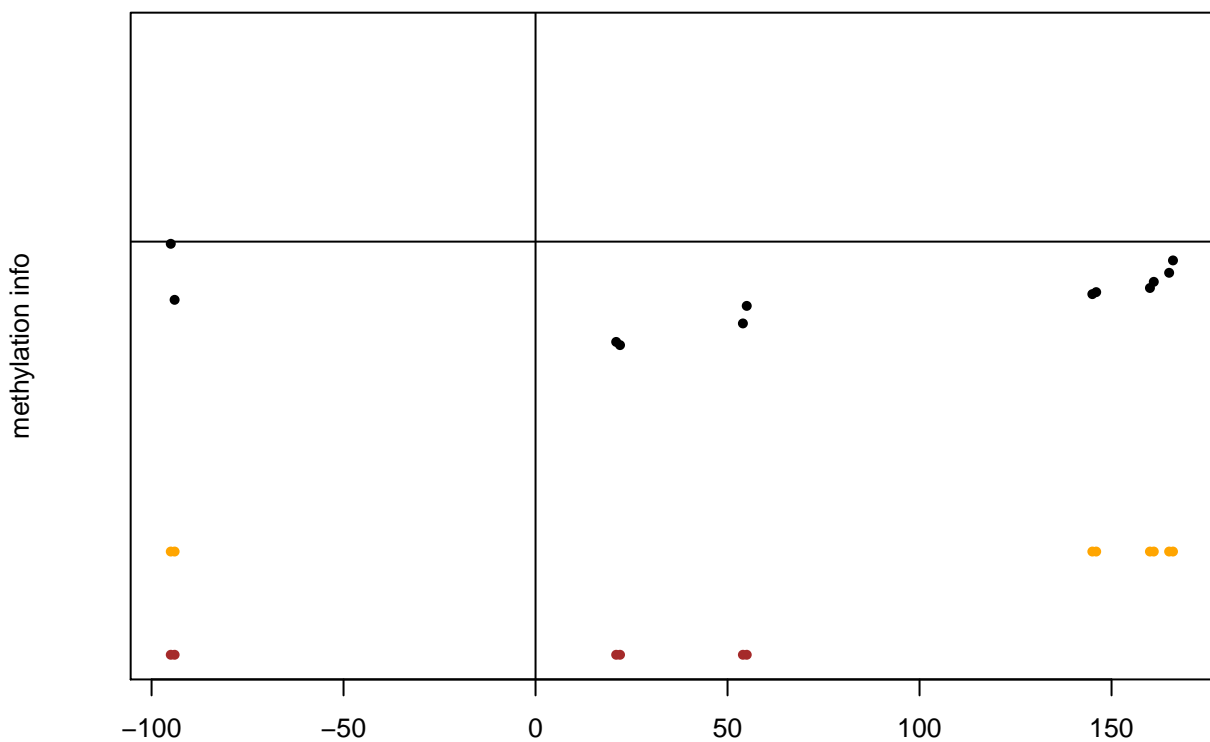

ALPK2 raw %methylation, red=UC, blue=Normal

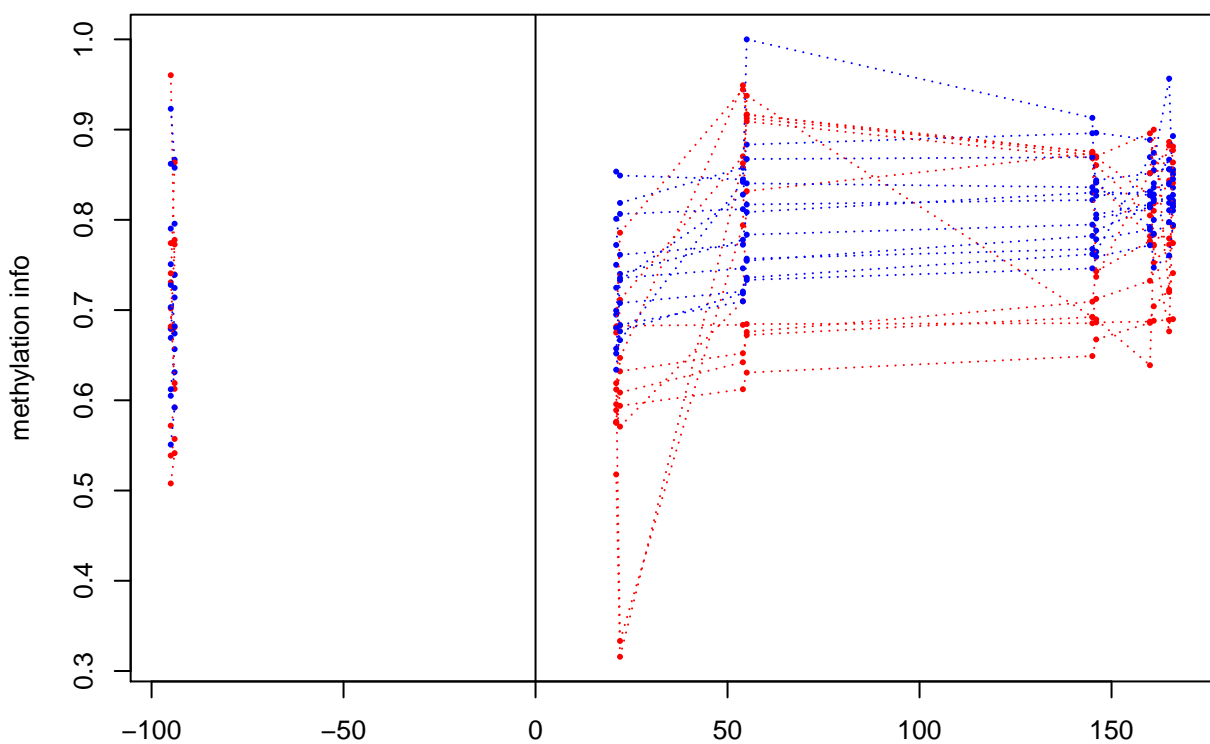

RNAseq logFC(UC-N)= 1.22

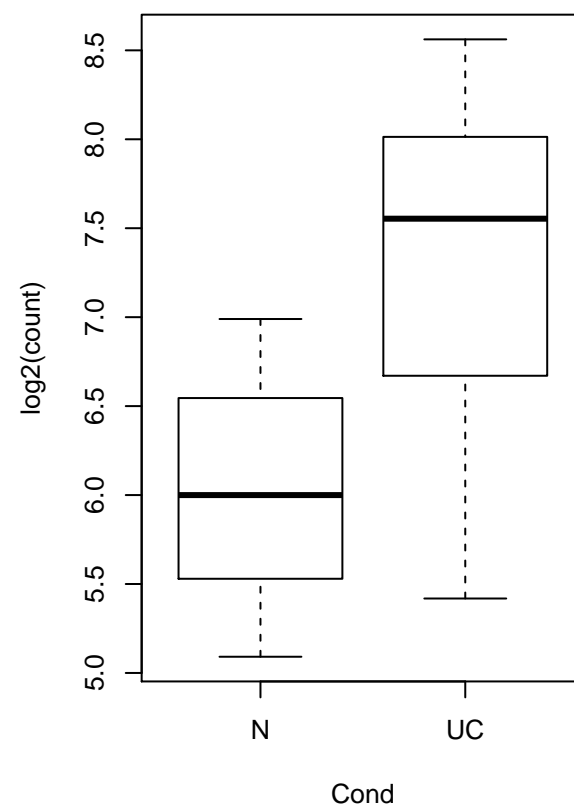

ALPL average UC-N %methylation max=4.56% min=-29.27%

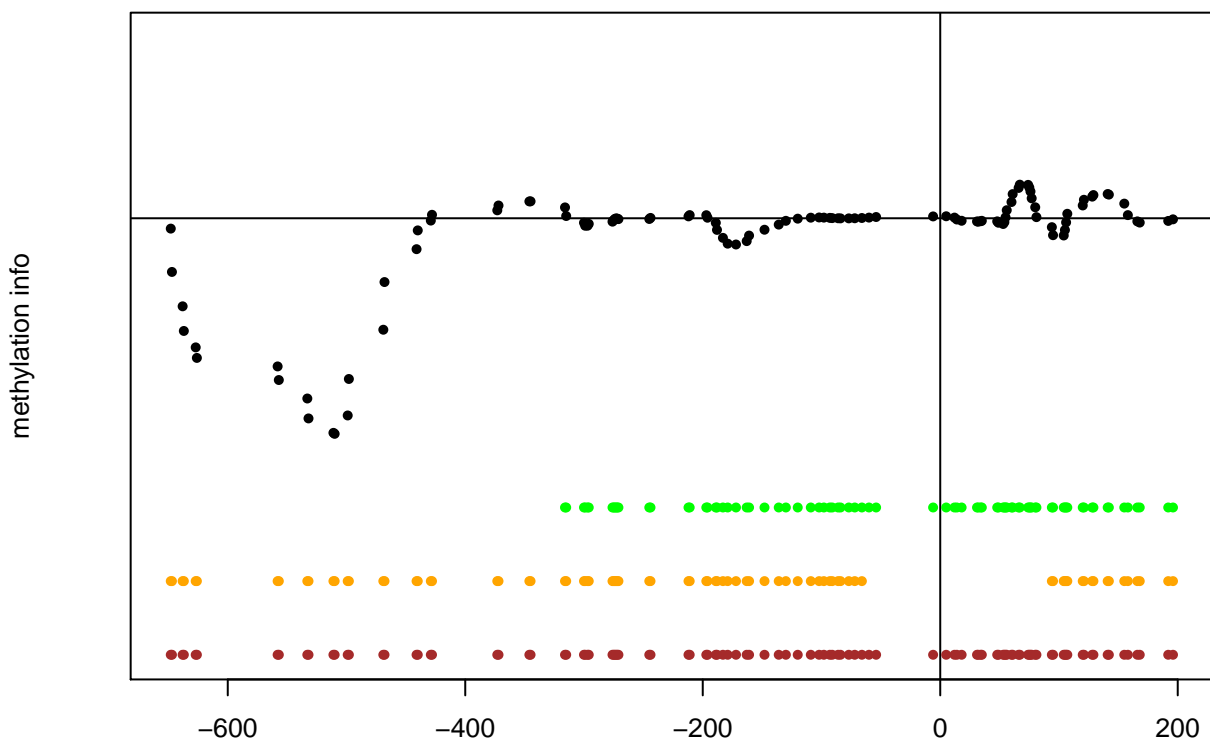

ALPL raw %methylation, red=UC, blue=Normal

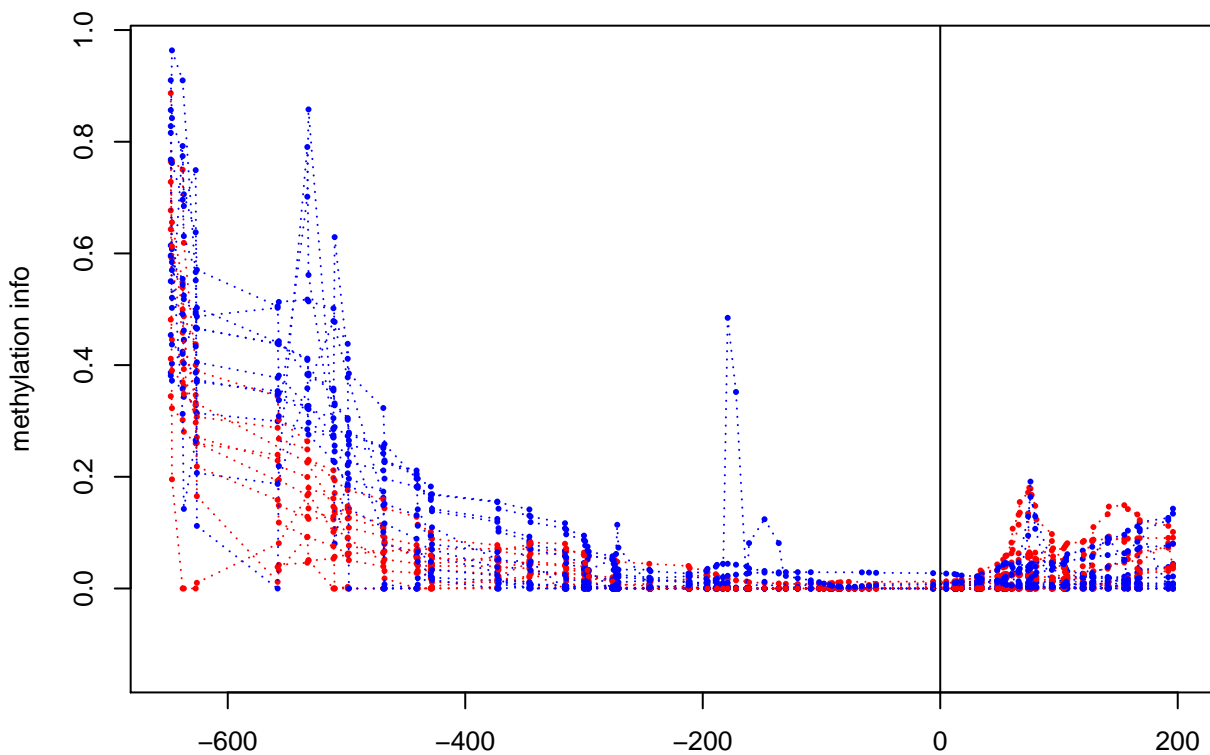

RNAseq logFC(UC-N)= 2.23

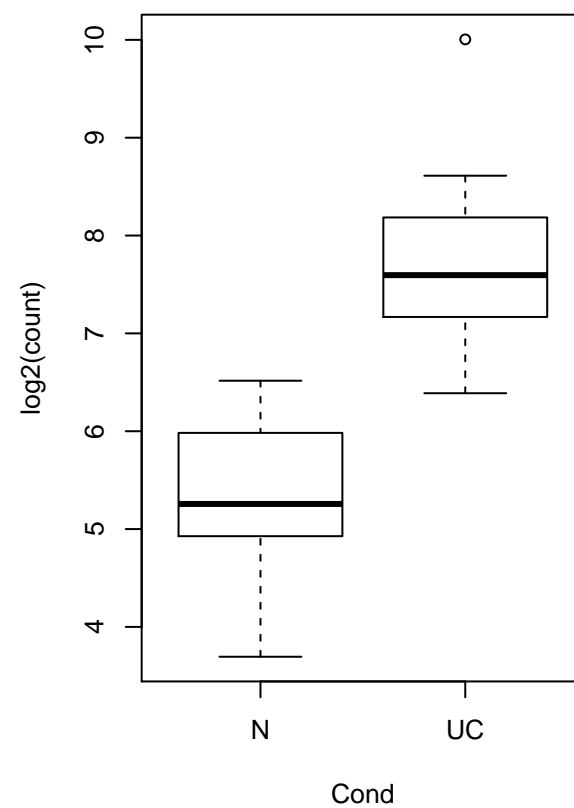

ANKRD62 average UC-N %methylation max=26.53% min=-9.66%

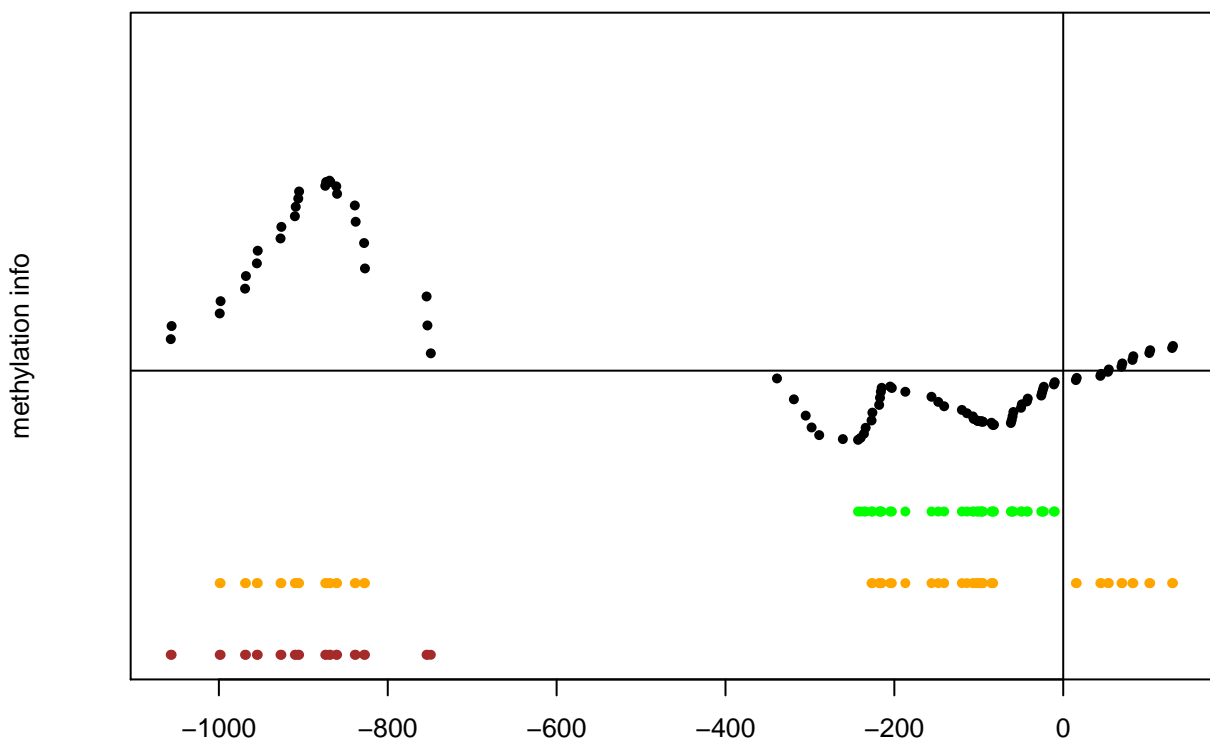

ANKRD62 raw %methylation, red=UC, blue=Normal

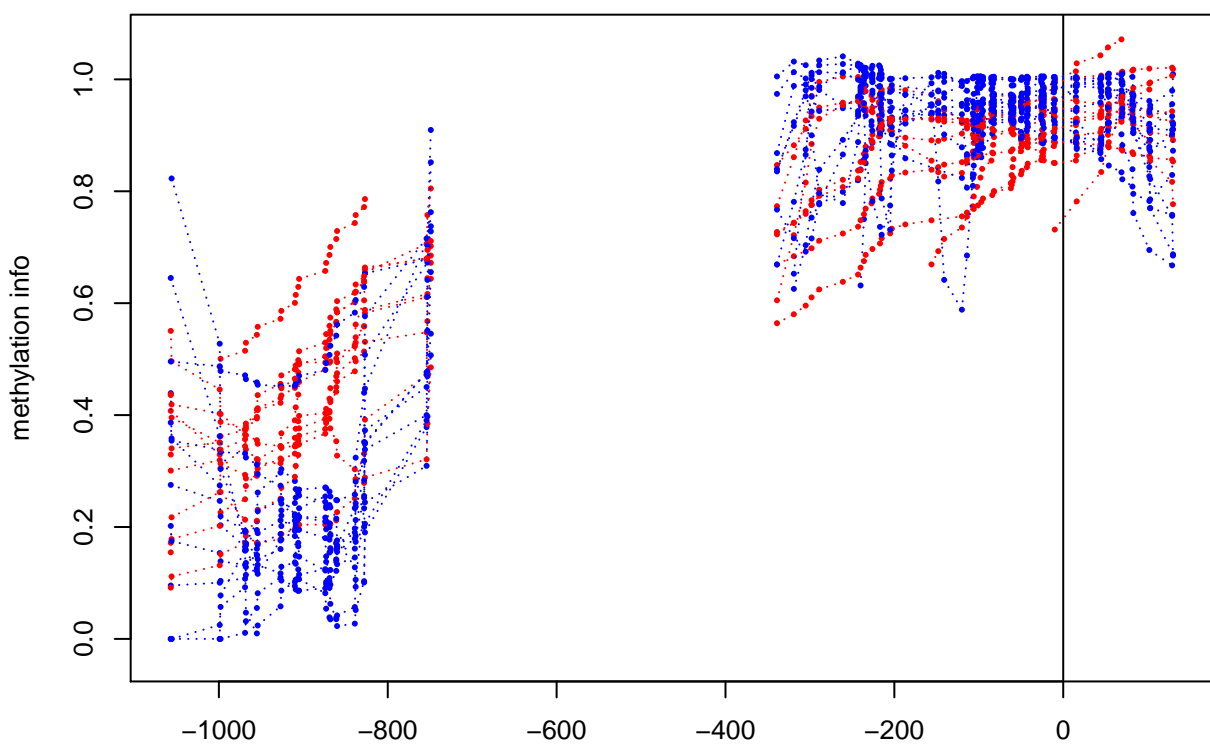

RNAseq logFC(UC-N)= -2.25

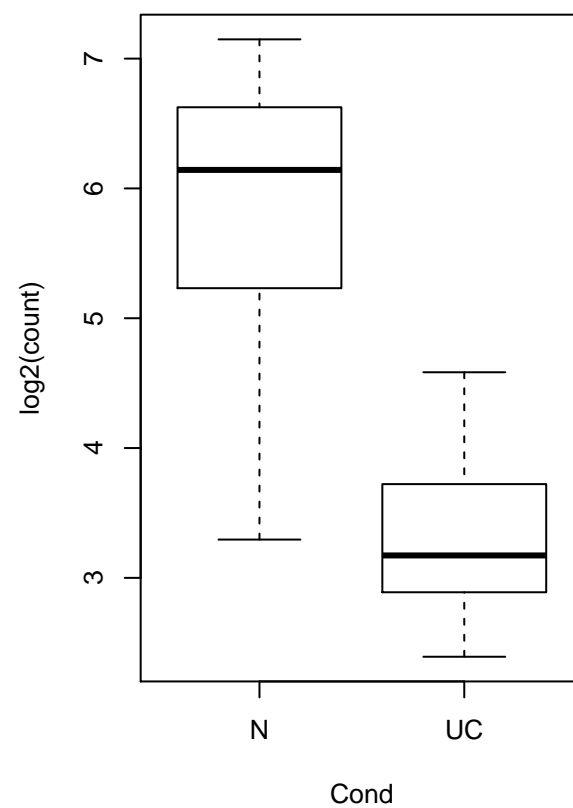

ANXA1 average UC-N %methylation max=-4.1% min=-18.6%

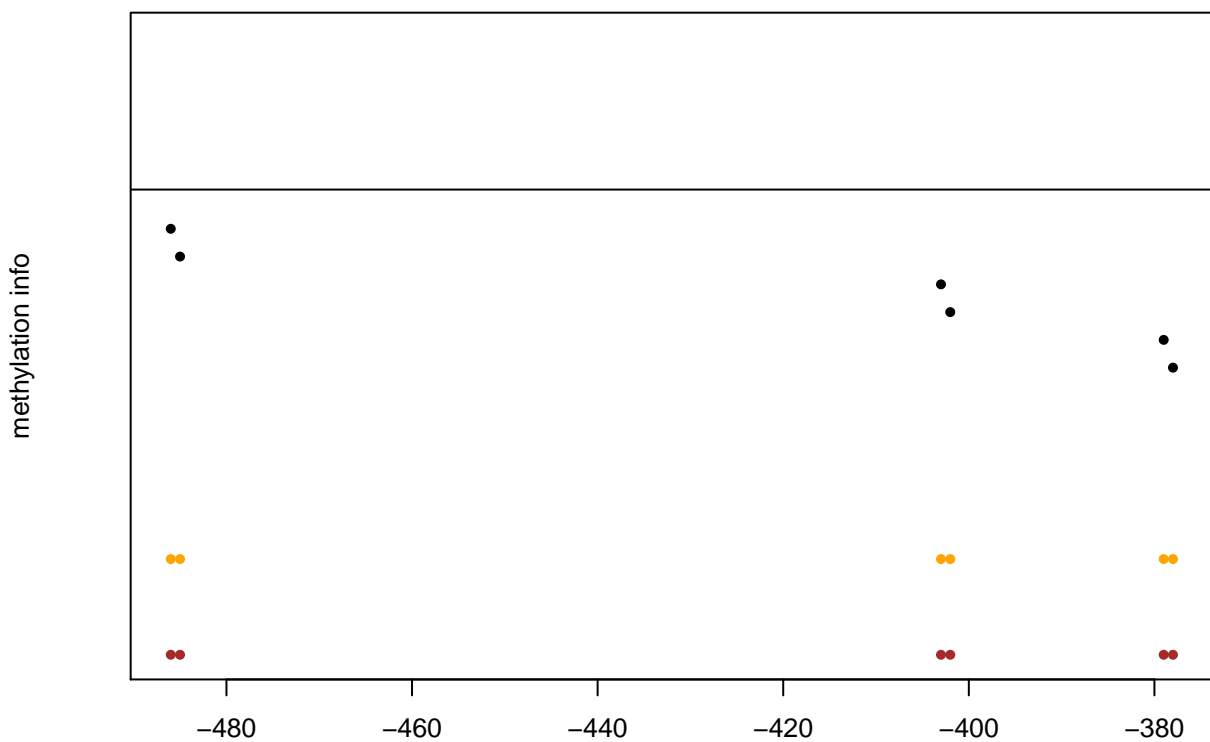

ANXA1 raw %methylation, red=UC, blue=Normal

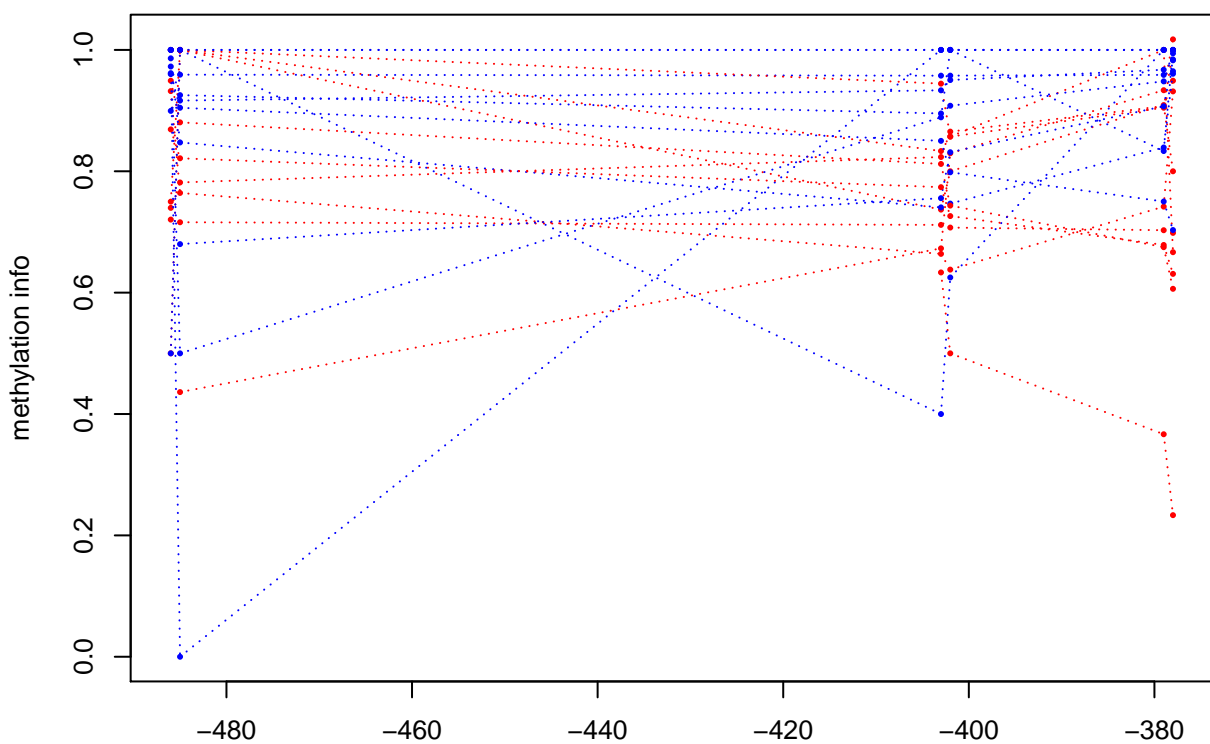

RNAseq logFC(UC-N)= 1.16

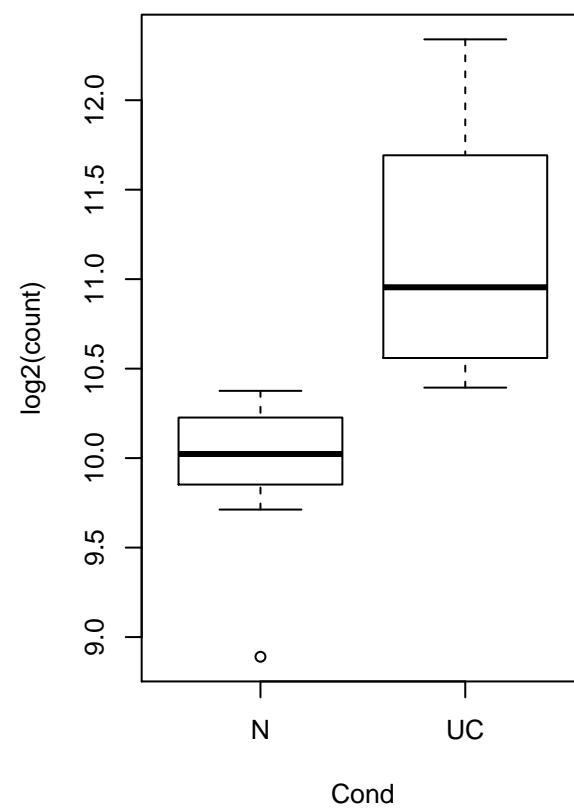



APBB1IP average UC-N %methylation max=-3.41% min=-28.99%

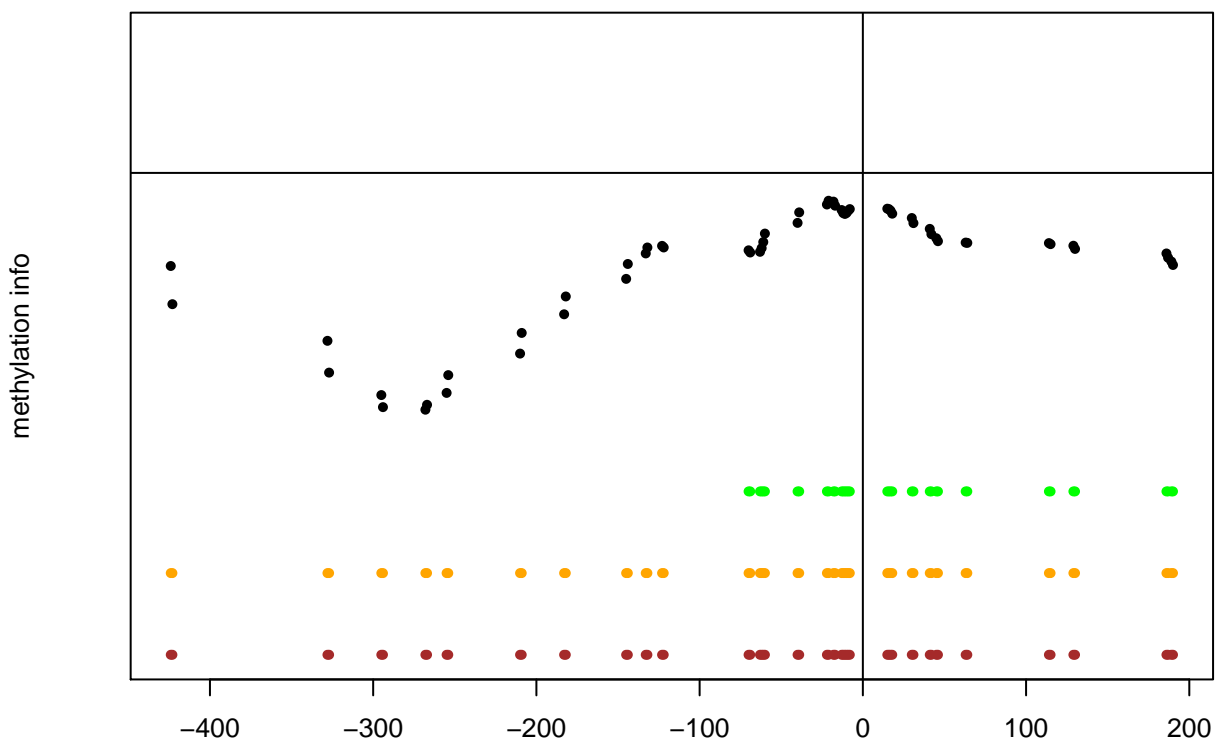

APBB1IP raw %methylation, red=UC, blue=Normal

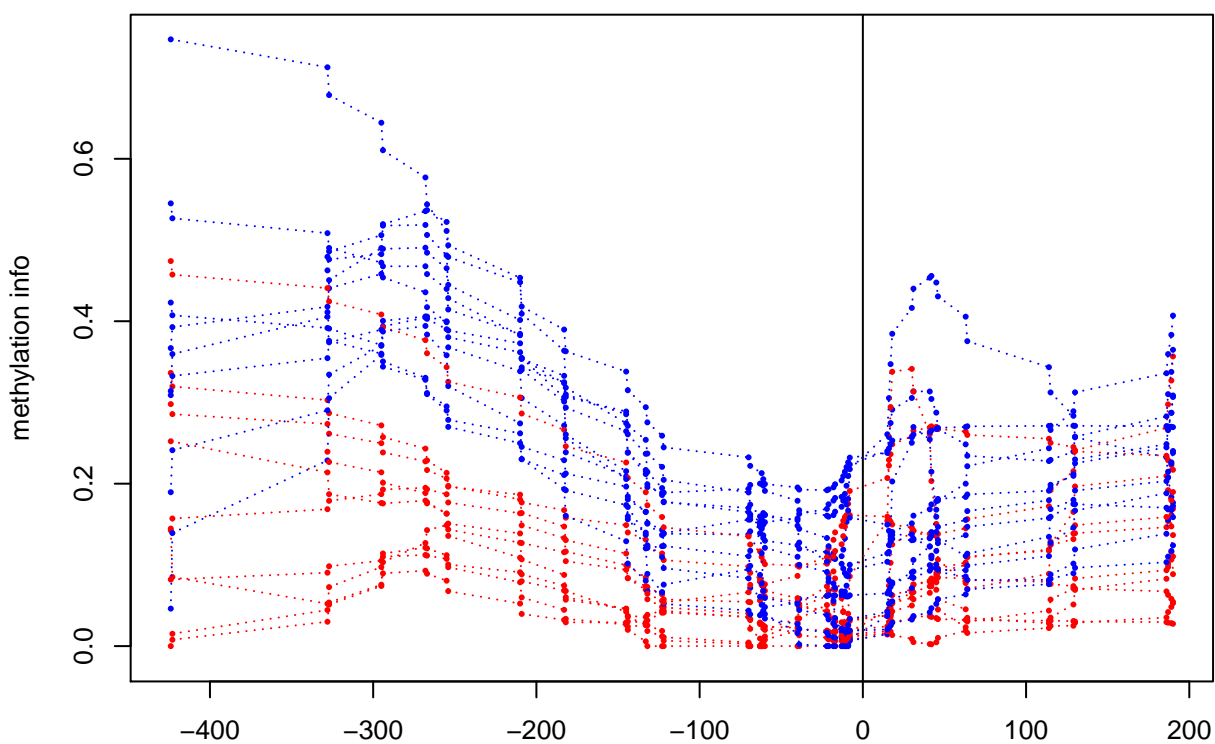

RNAseq logFC(UC-N)= 1.1

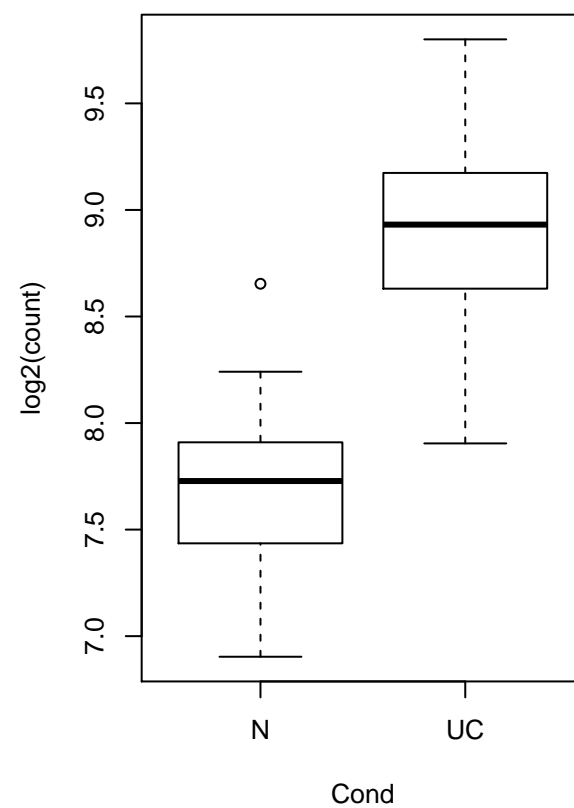

**APOBEC3G average UC-N %methylation max=7.92% min=-27.22%**

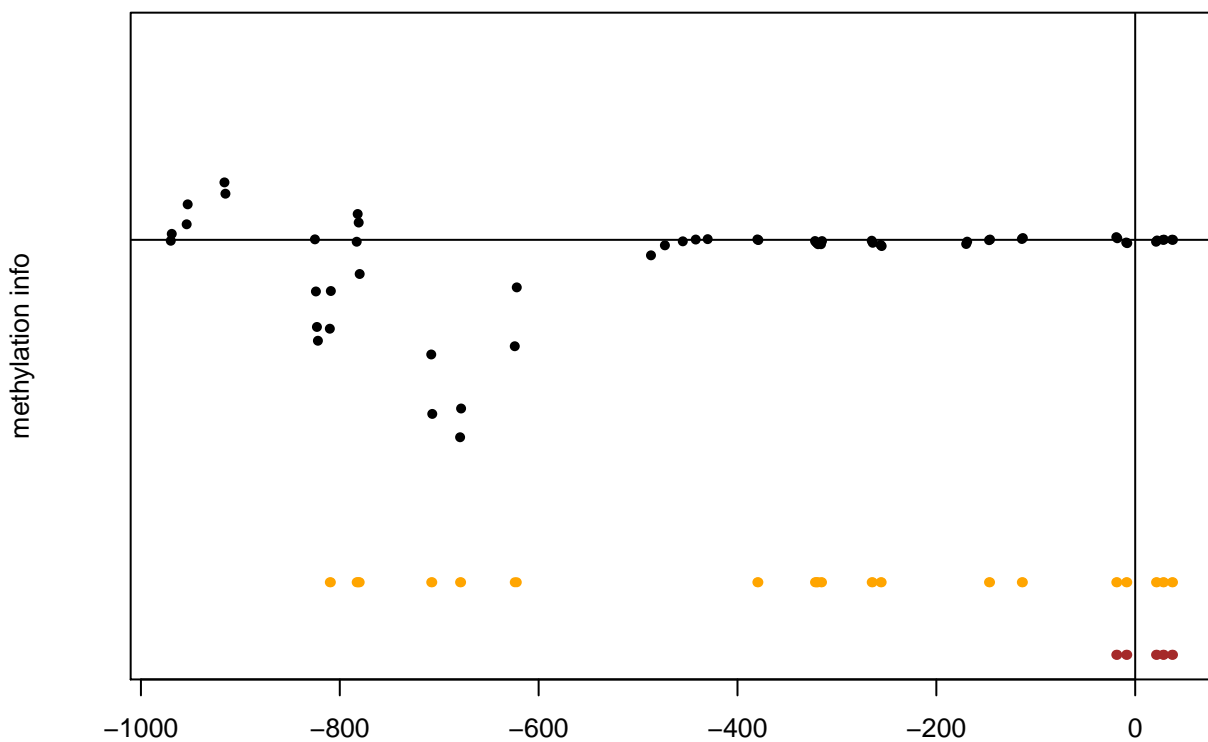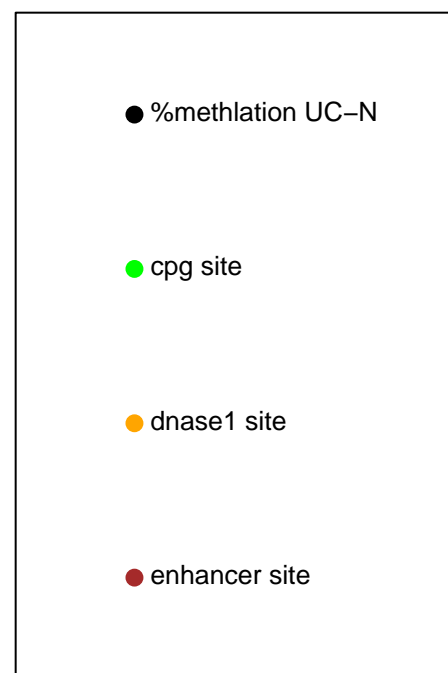

**APOBEC3G raw %methylation, red=UC, blue=Normal**

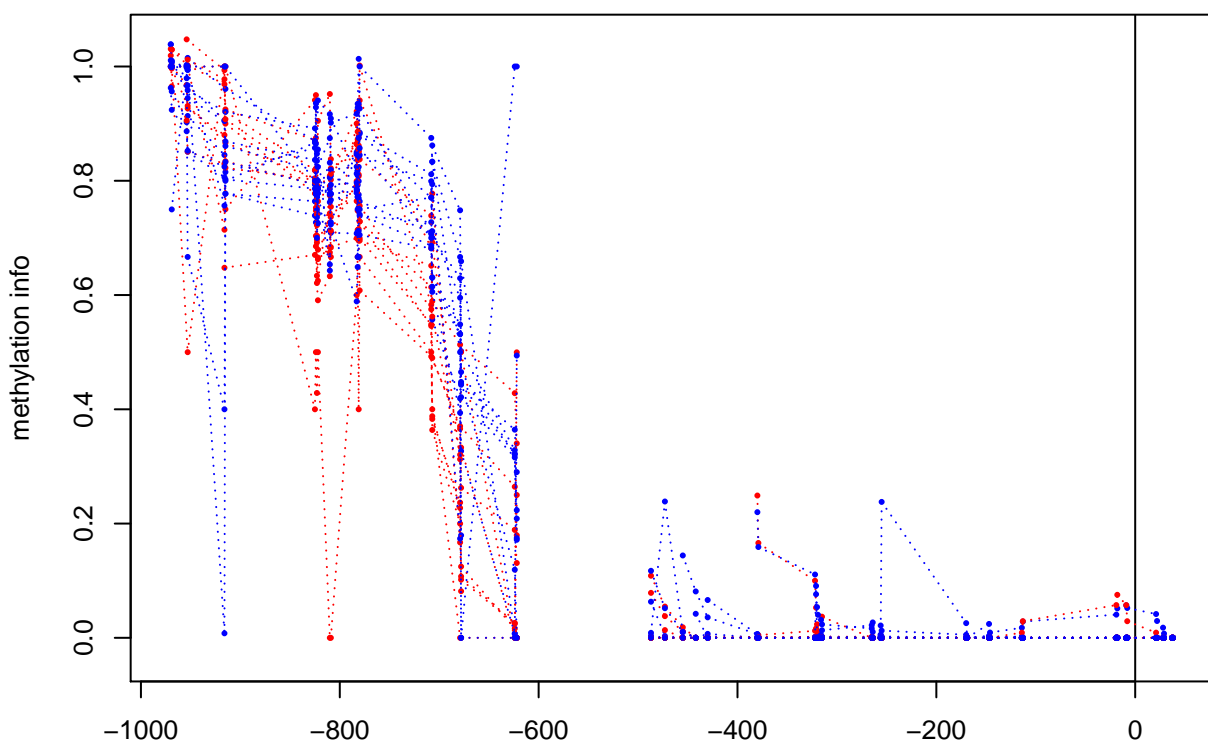

**RNAseq logFC(UC-N)= 1.36**

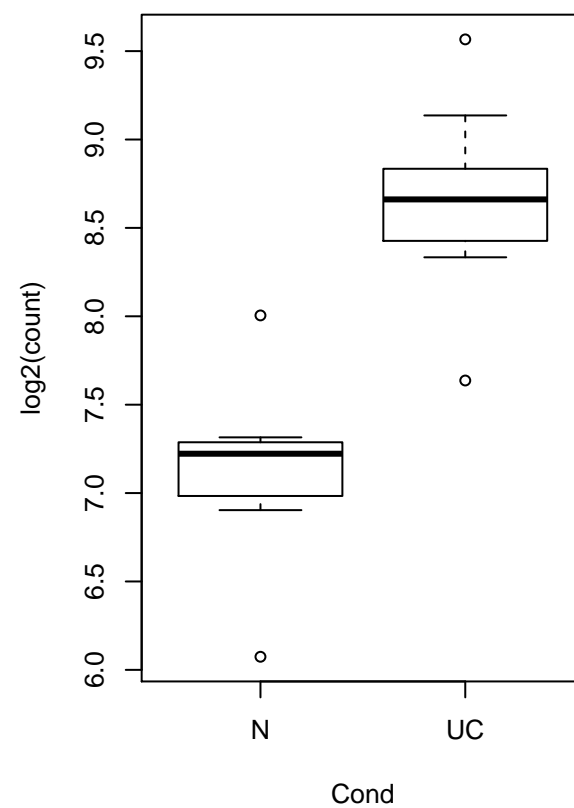

AQP9 average UC-N %methylation max=-7.15% min=-13.03%

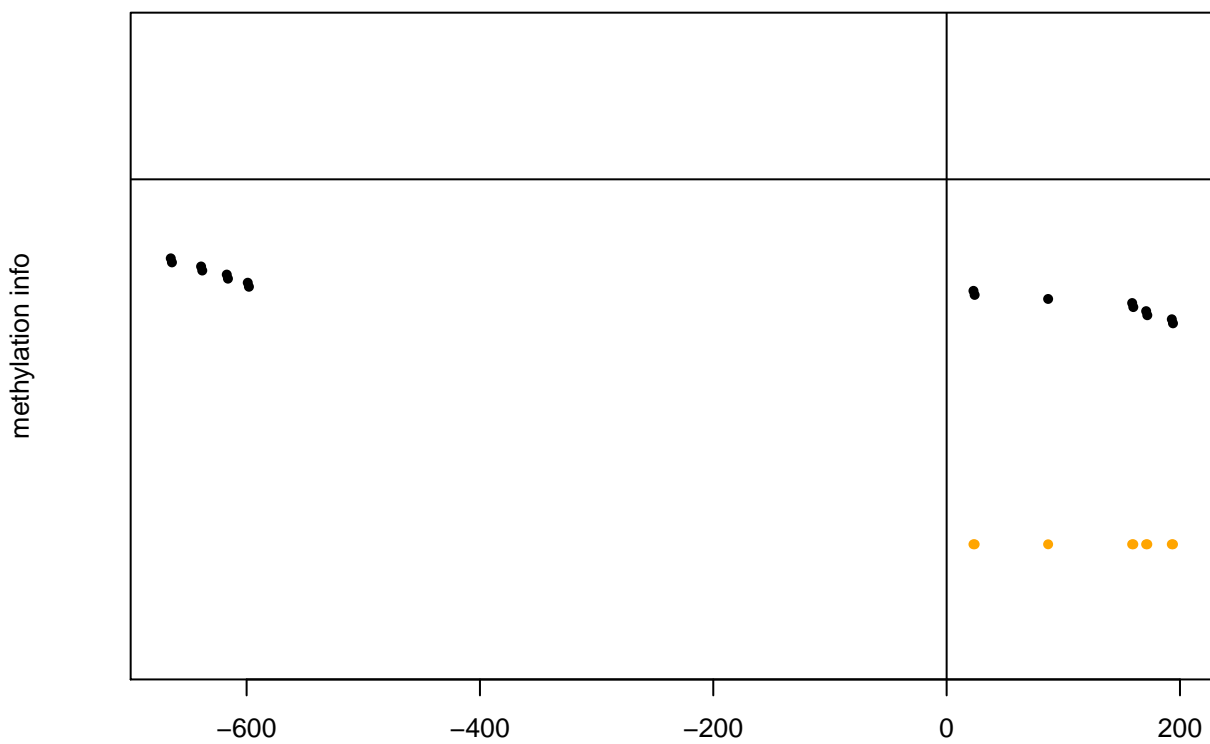

AQP9 raw %methylation, red=UC, blue=Normal

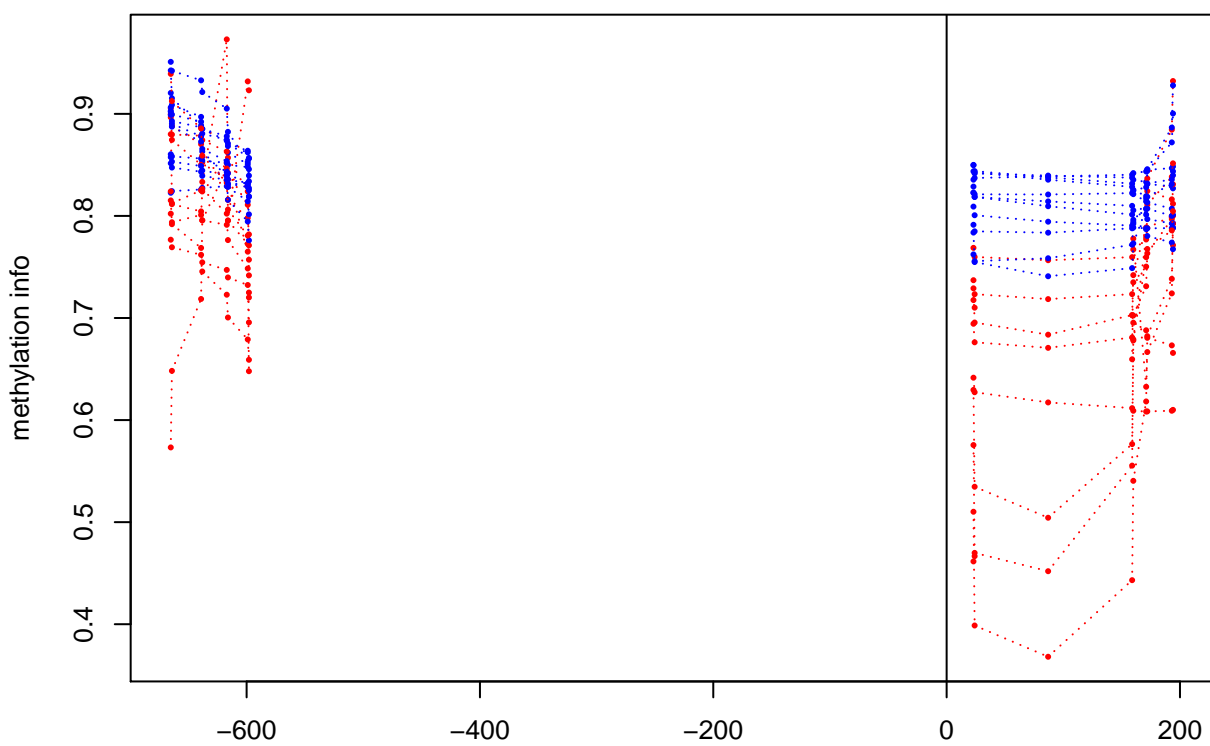

RNAseq logFC(UC-N)= 5.37

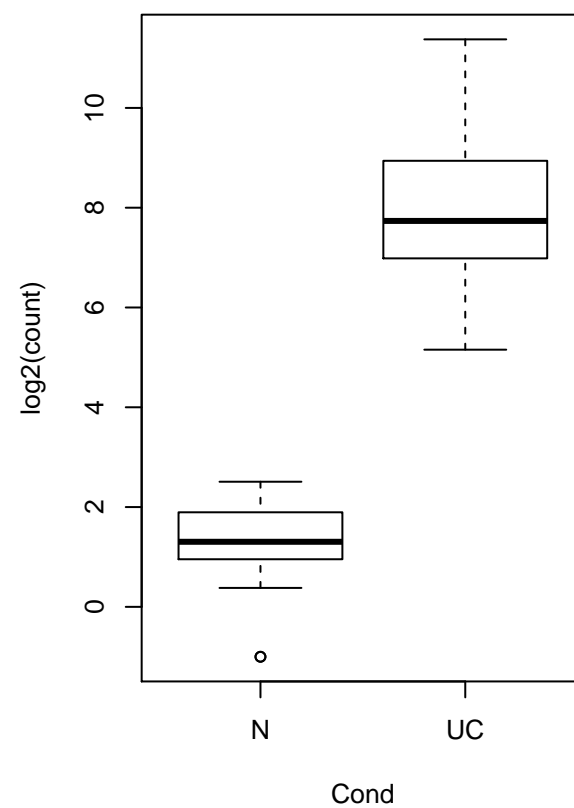

ARHGAP30 average UC-N %methylation max=-25.58% min=-45.19%

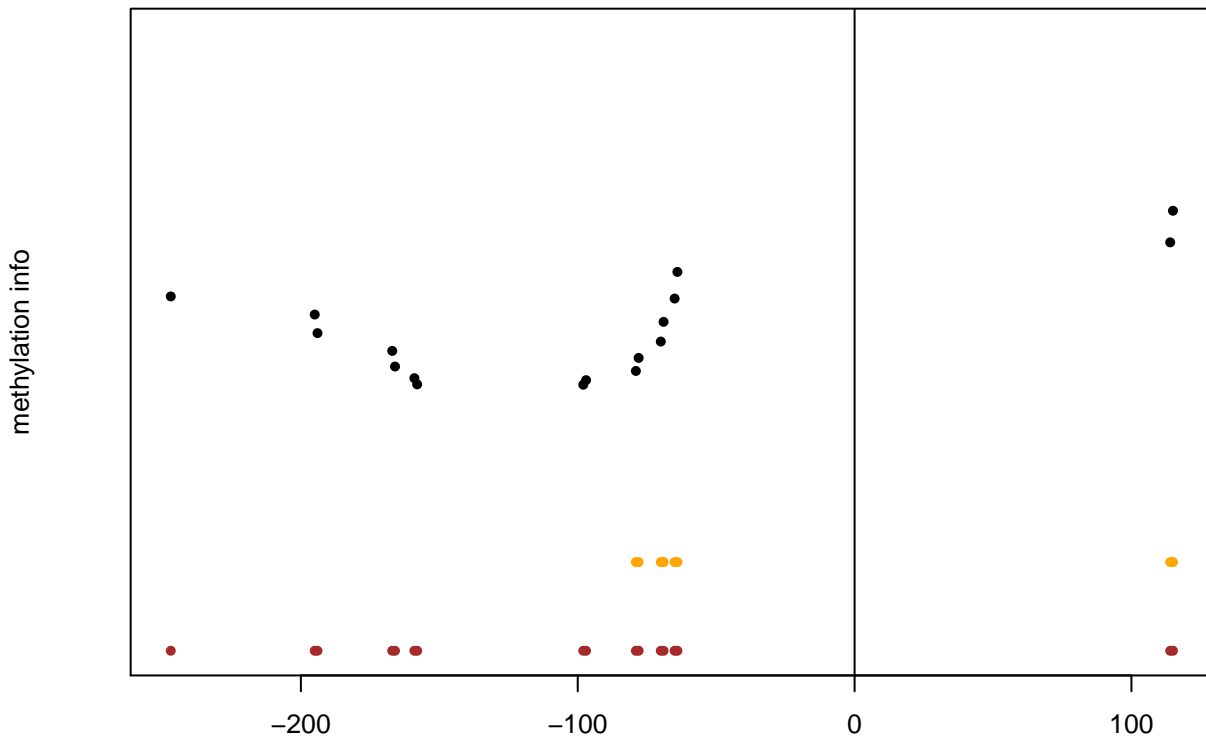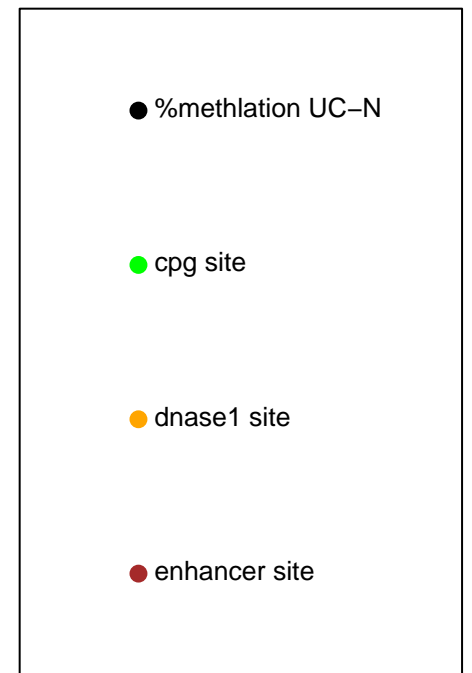

ARHGAP30 raw %methylation, red=UC, blue=Normal

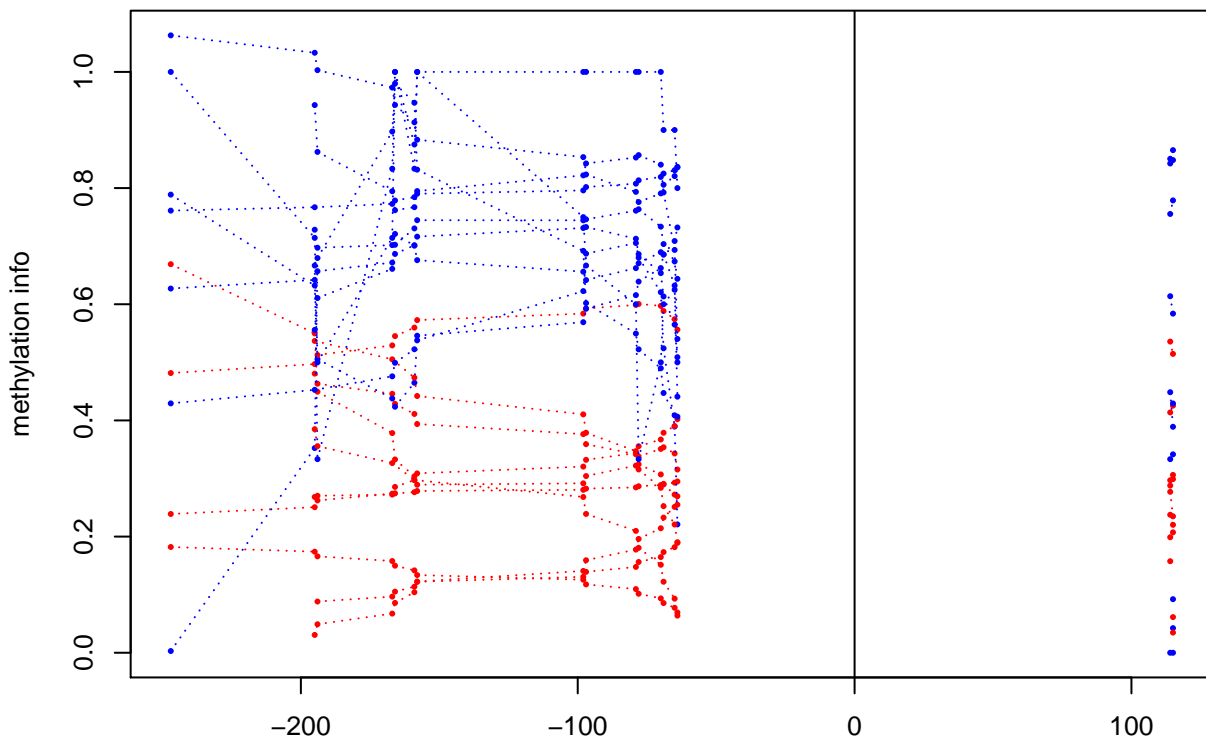

RNAseq logFC(UC-N)= 1.13

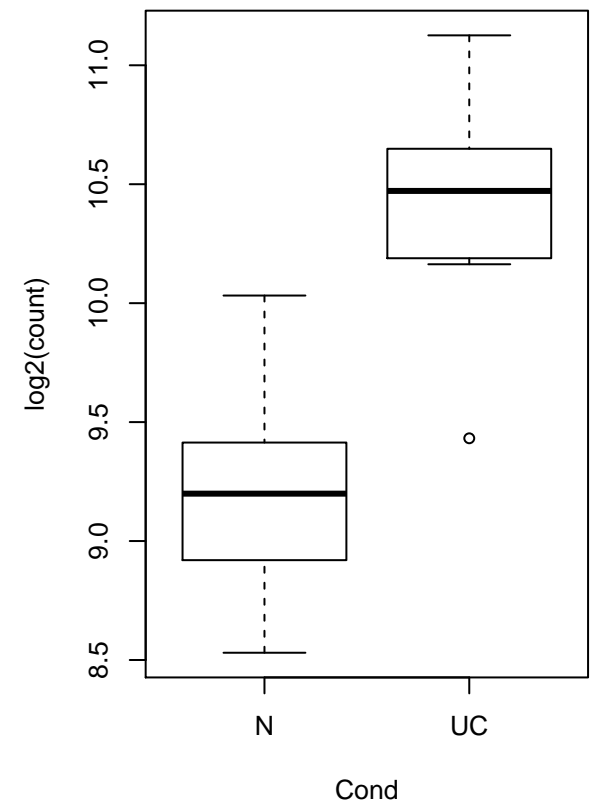

ARHGDIB average UC-N %methylation max=-26.03% min=-34.44%

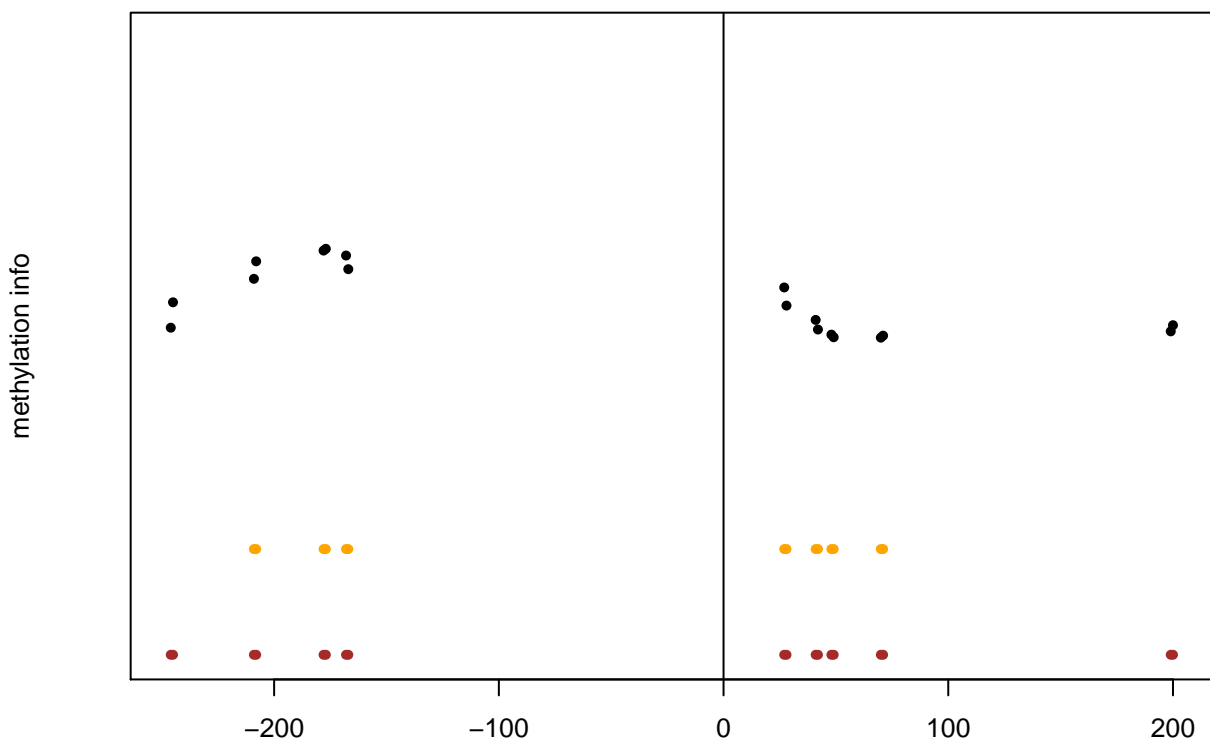

ARHGDIB raw %methylation, red=UC, blue=Normal

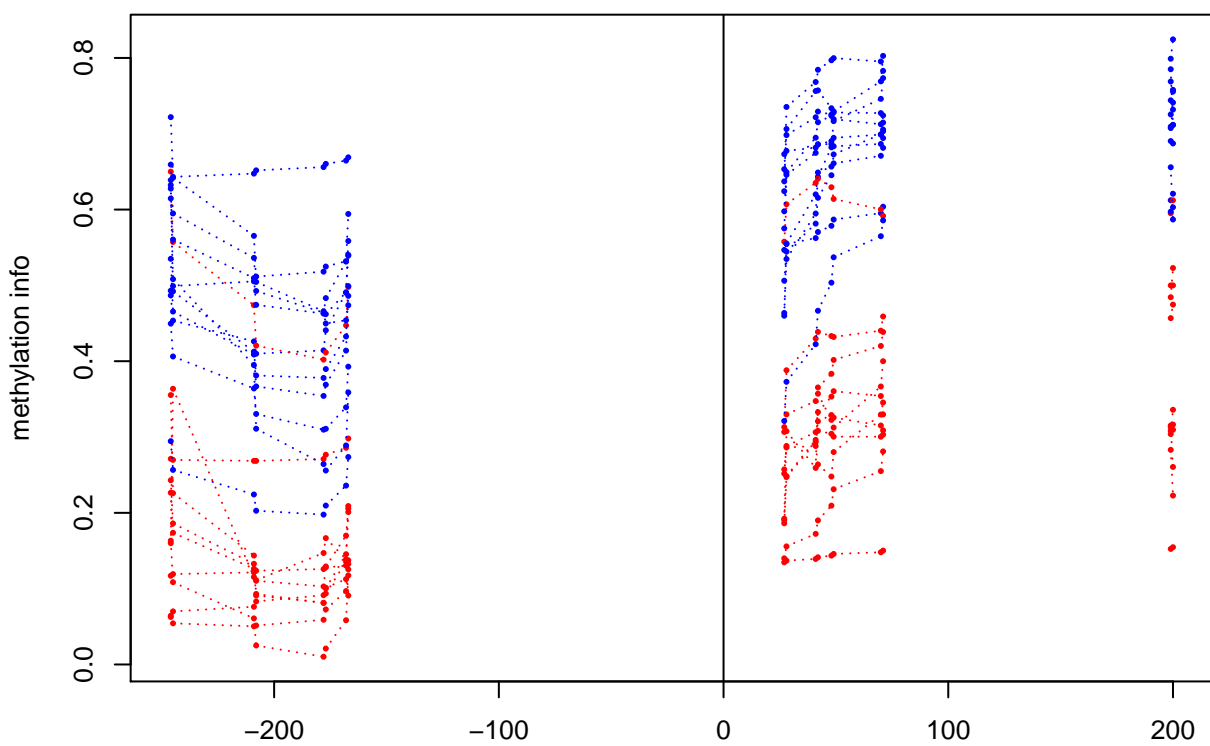

RNAseq logFC(UC-N)= 1.12

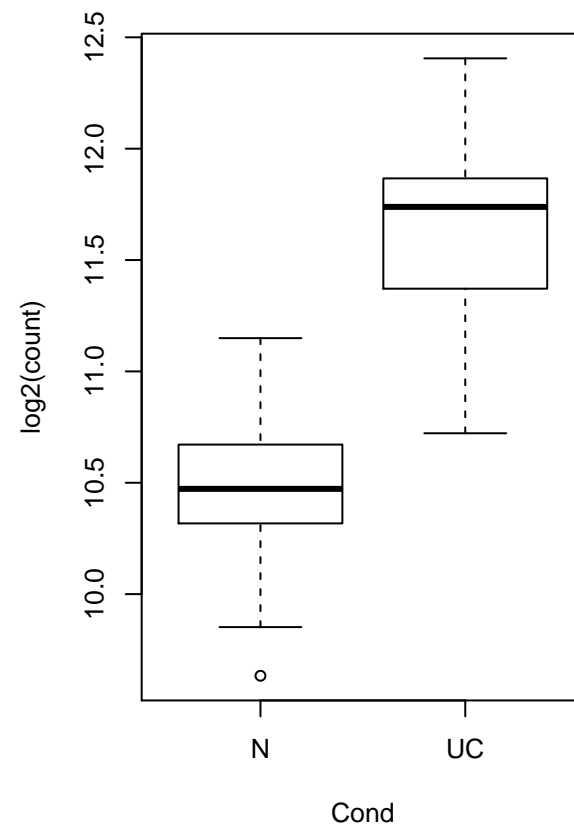

BASP1 average UC-N %methylation max=-0.02% min=-6.52%

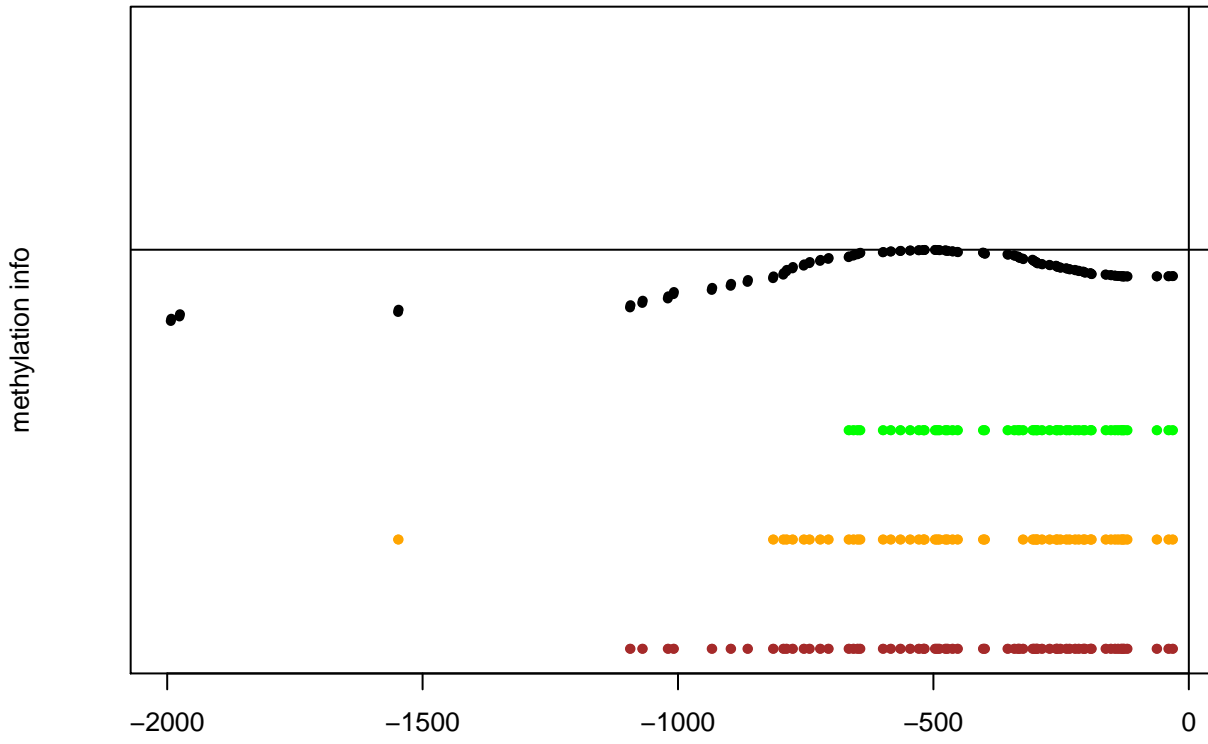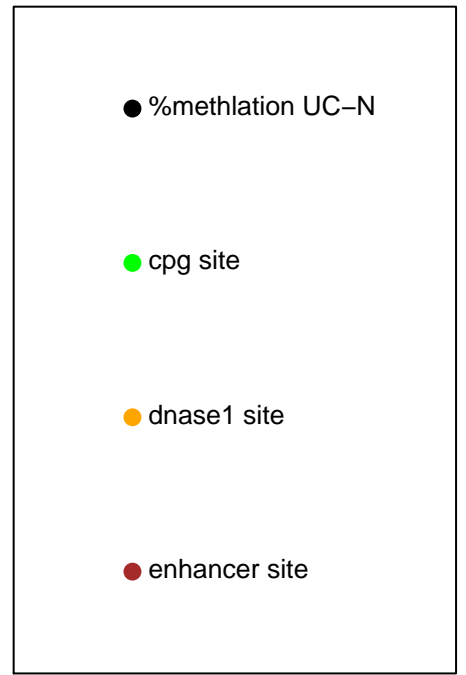

BASP1 raw %methylation, red=UC, blue=Normal

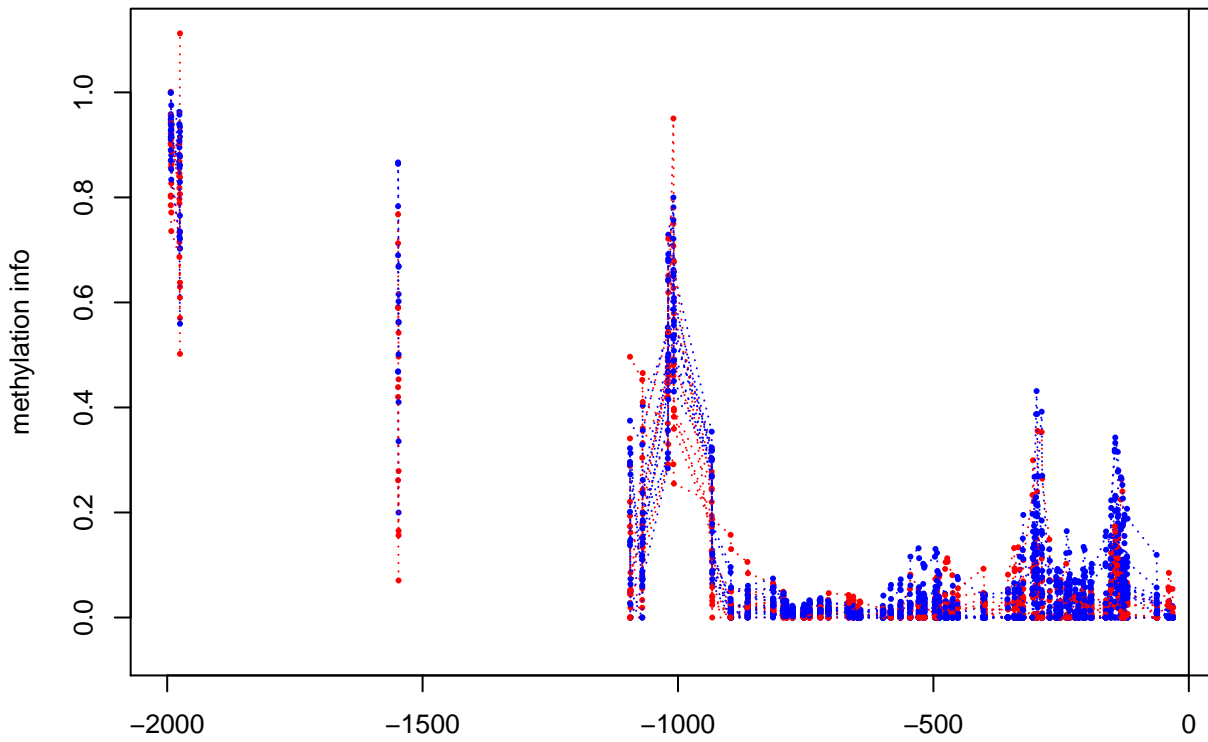

RNAseq logFC(UC-N)= 1.48

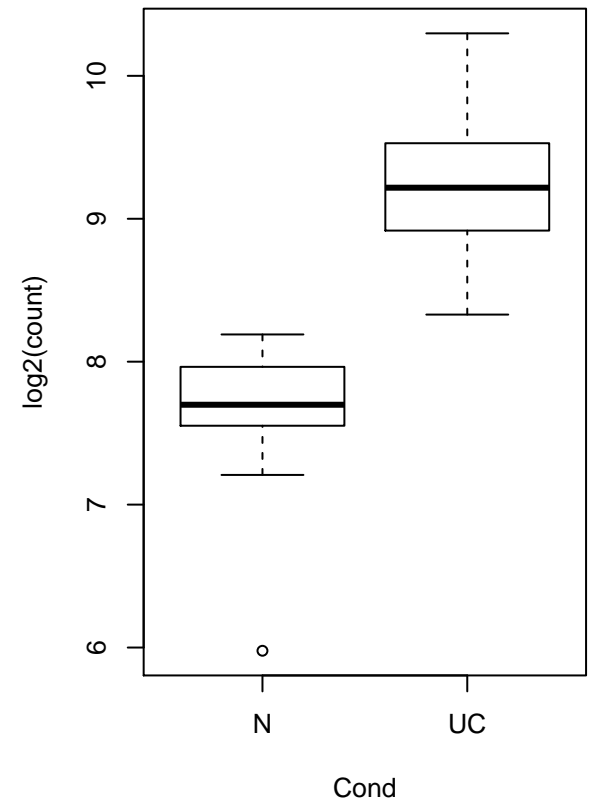

BATF average UC-N %methylation max=4.36% min=-33.74%

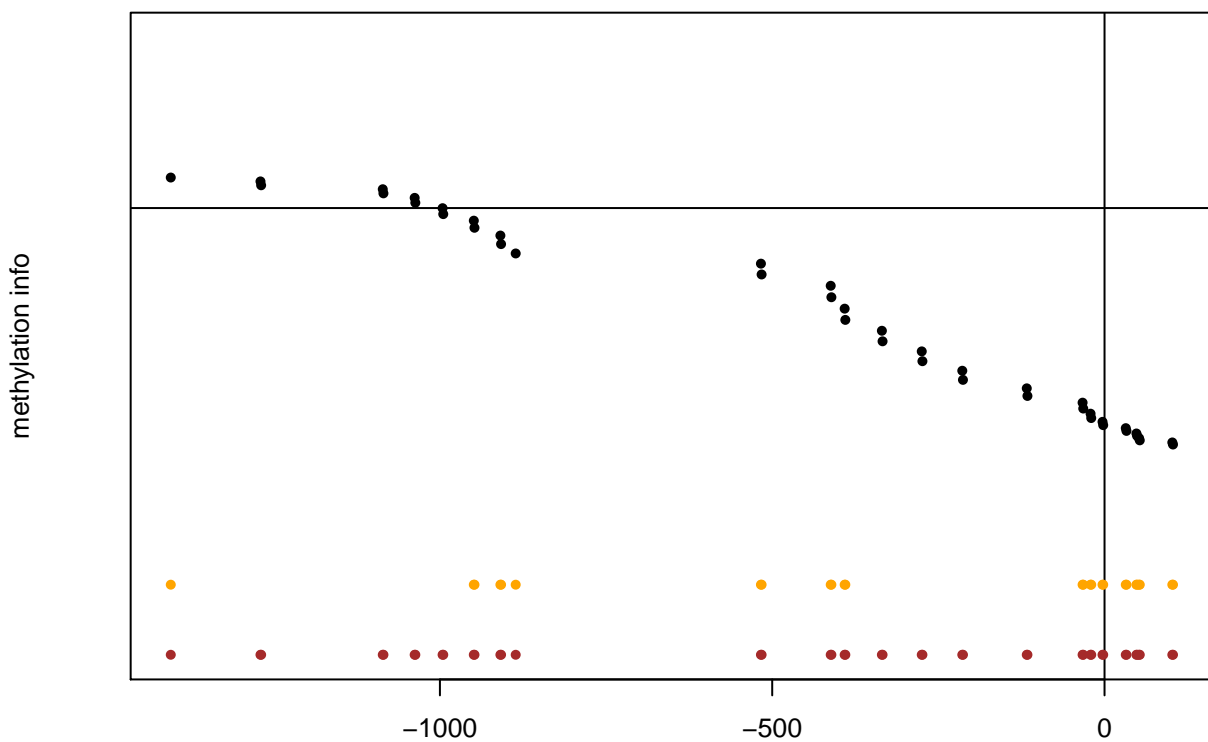

BATF raw %methylation, red=UC, blue=Normal

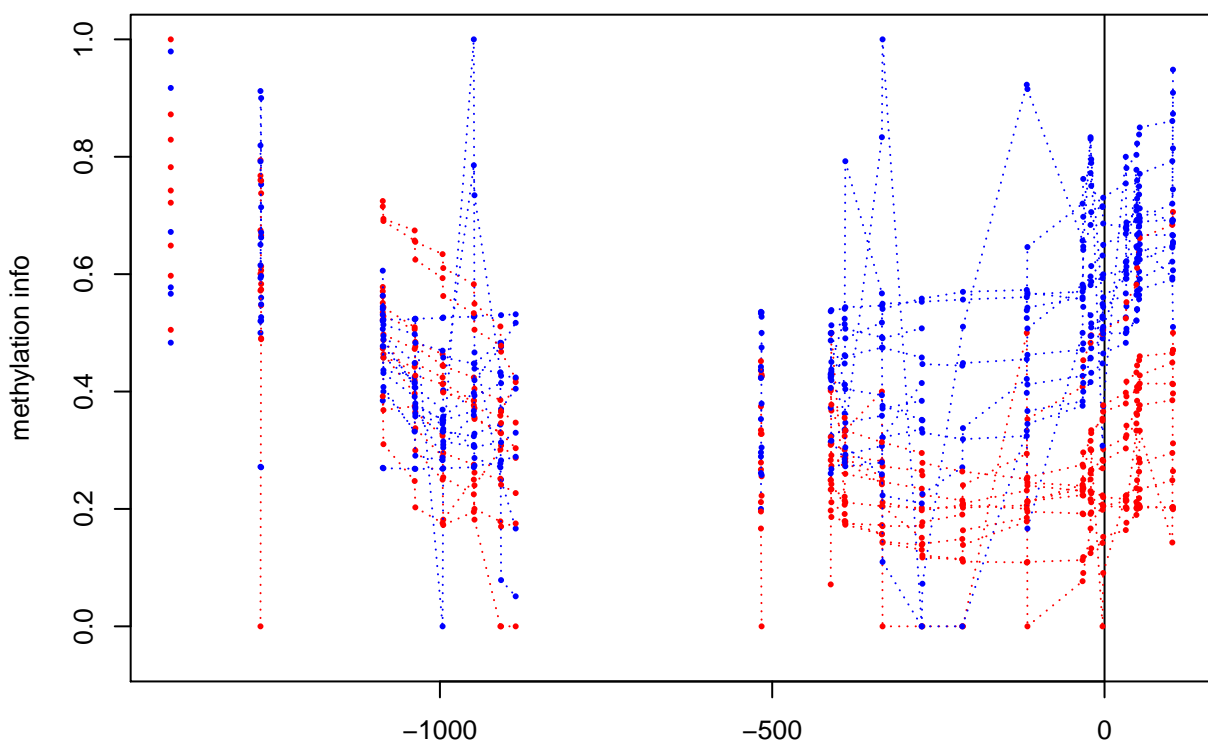

RNAseq logFC(UC-N)= 2.1

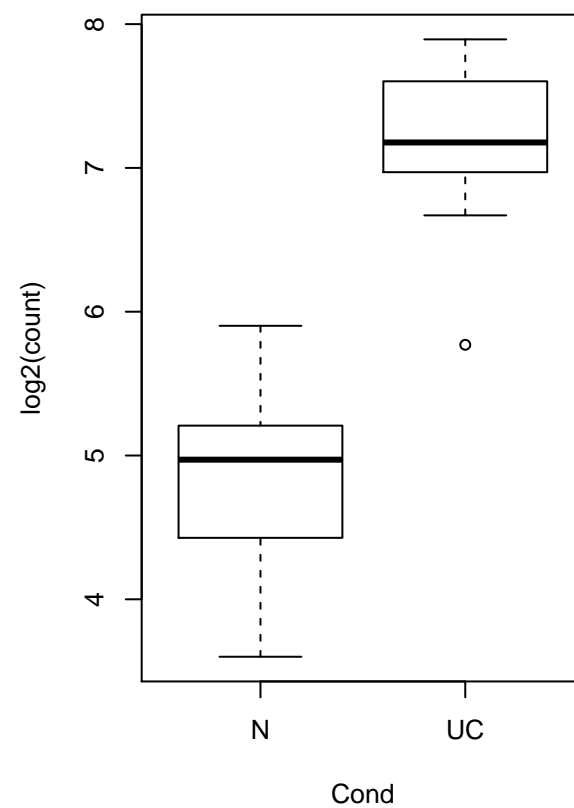

BCAS4 average UC-N %methylation max=0.47% min=-37.33%

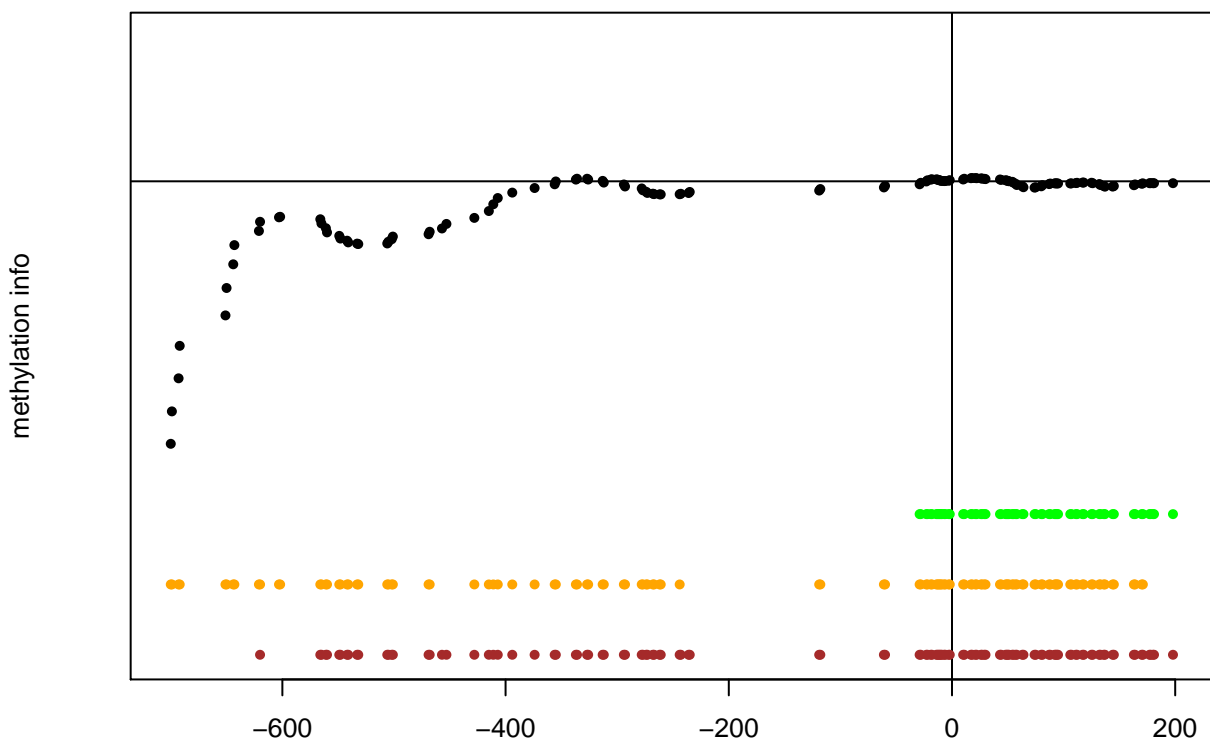

BCAS4 raw %methylation, red=UC, blue=Normal

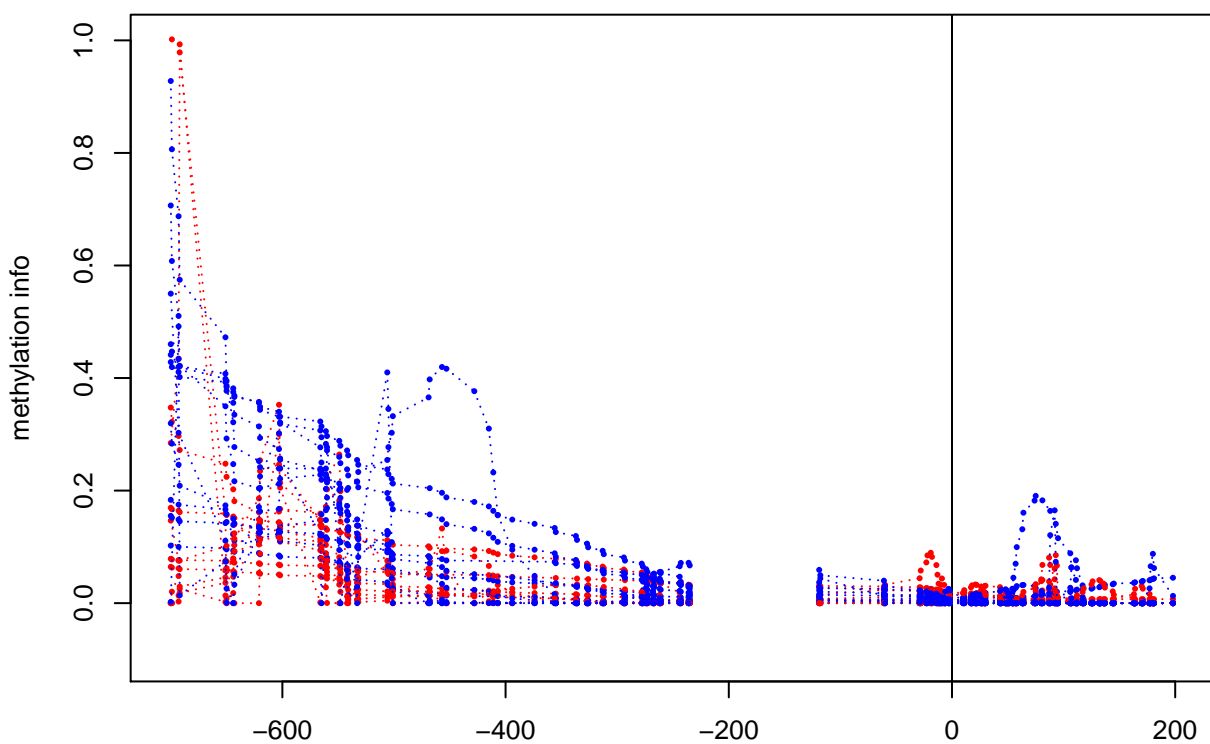

RNAseq logFC(UC-N)= 1.12

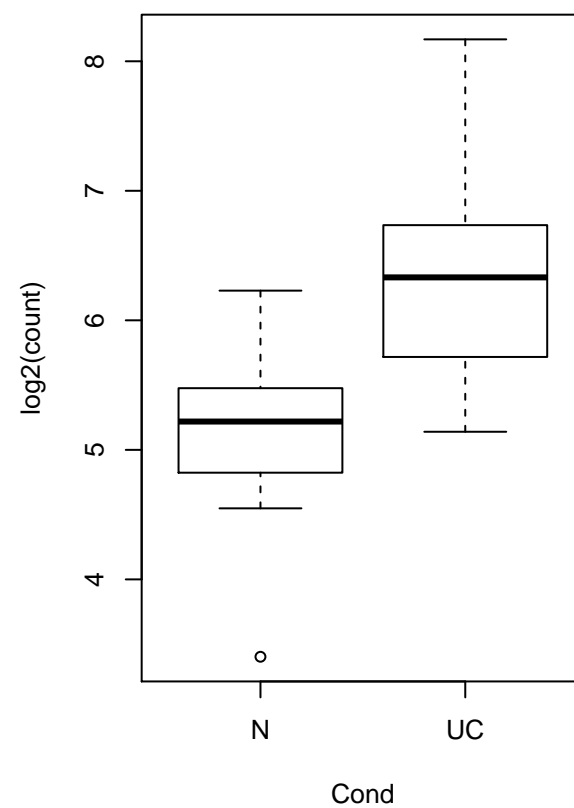



BCHE average UC-N %methylation max=5.47% min=4.89%

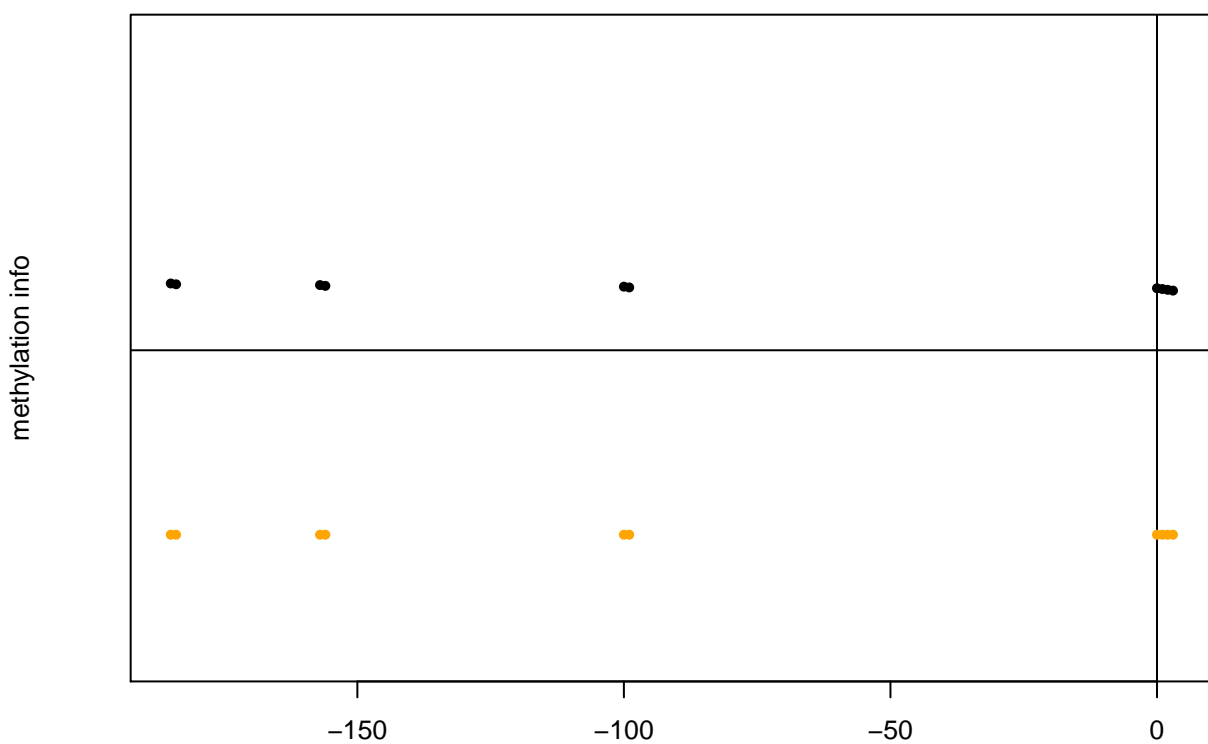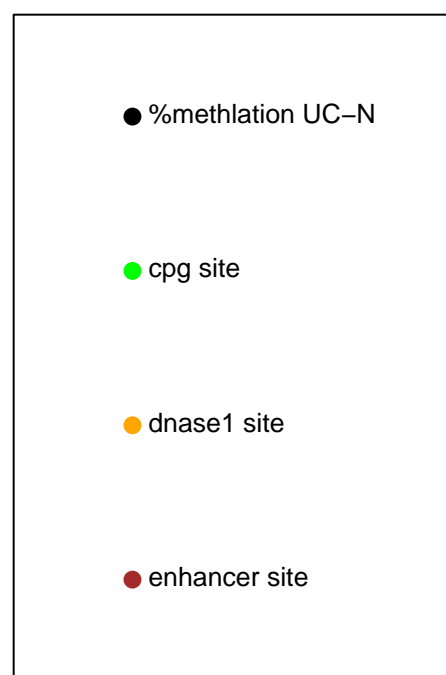

BCHE raw %methylation, red=UC, blue=Normal

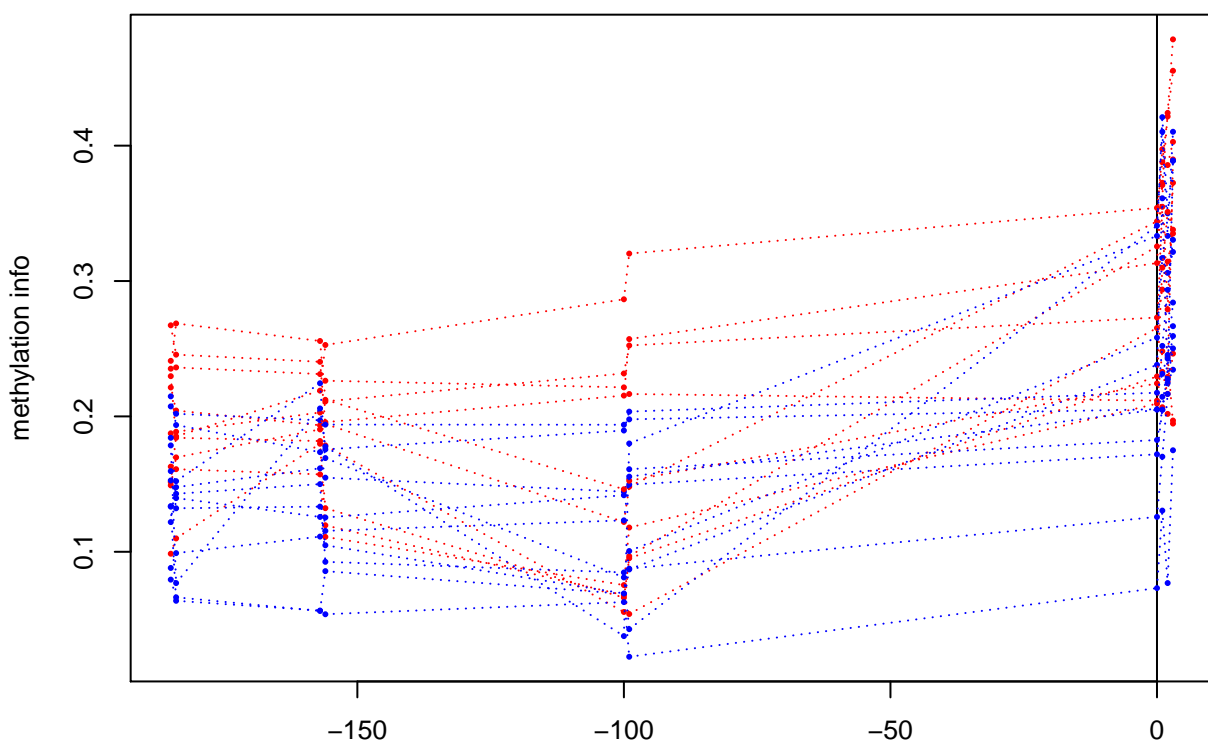

RNAseq logFC(UC-N)= -1.69

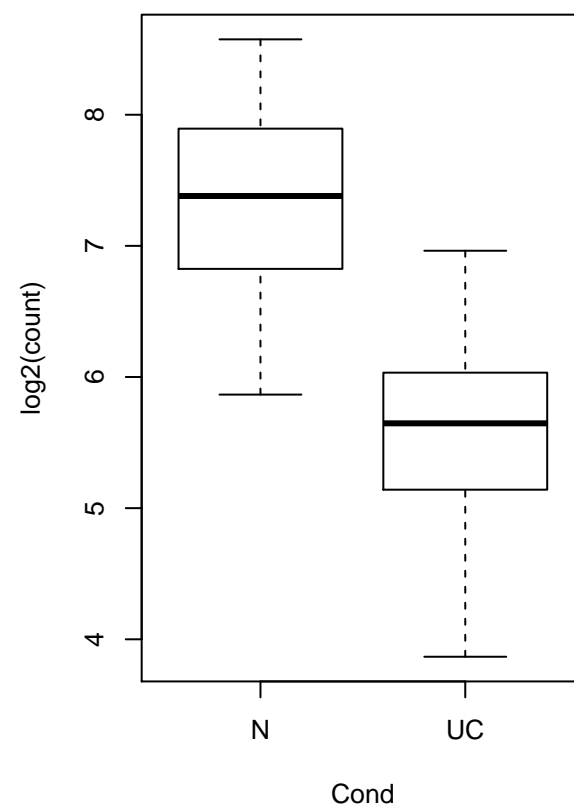

BHLHE40 average UC-N %methylation max=1.23% min=-13.54%

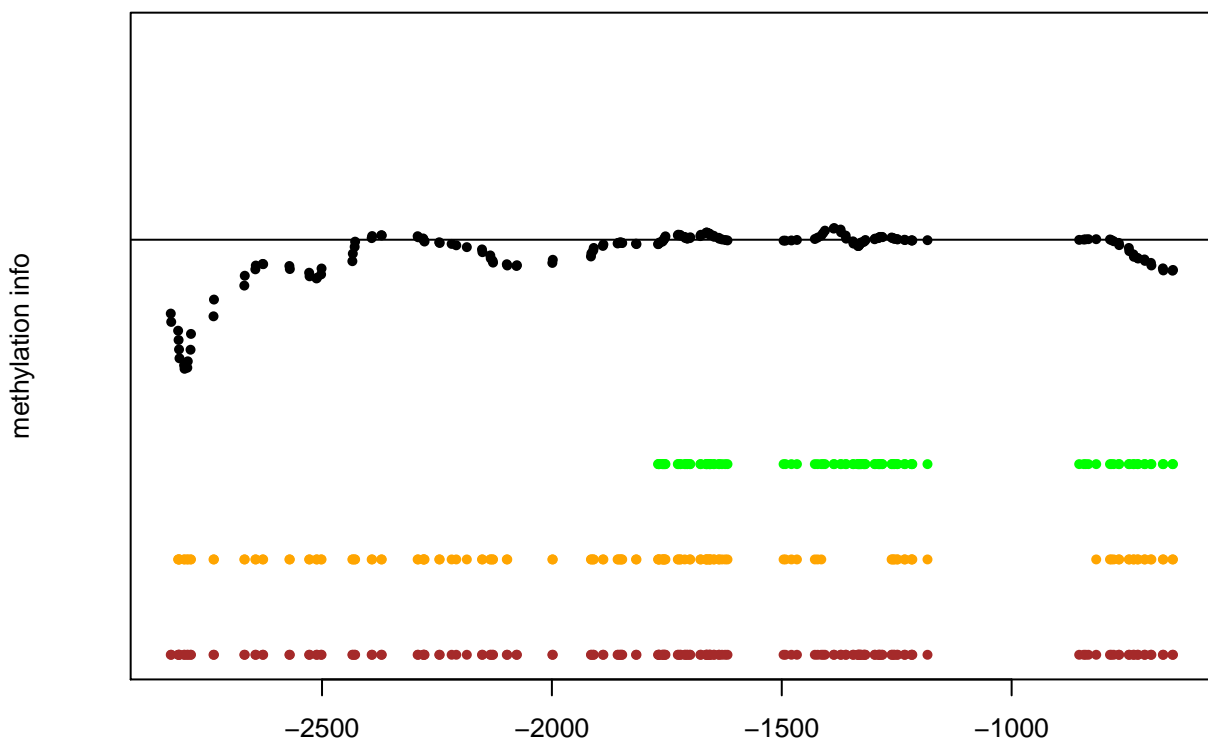

BHLHE40 raw %methylation, red=UC, blue=Normal

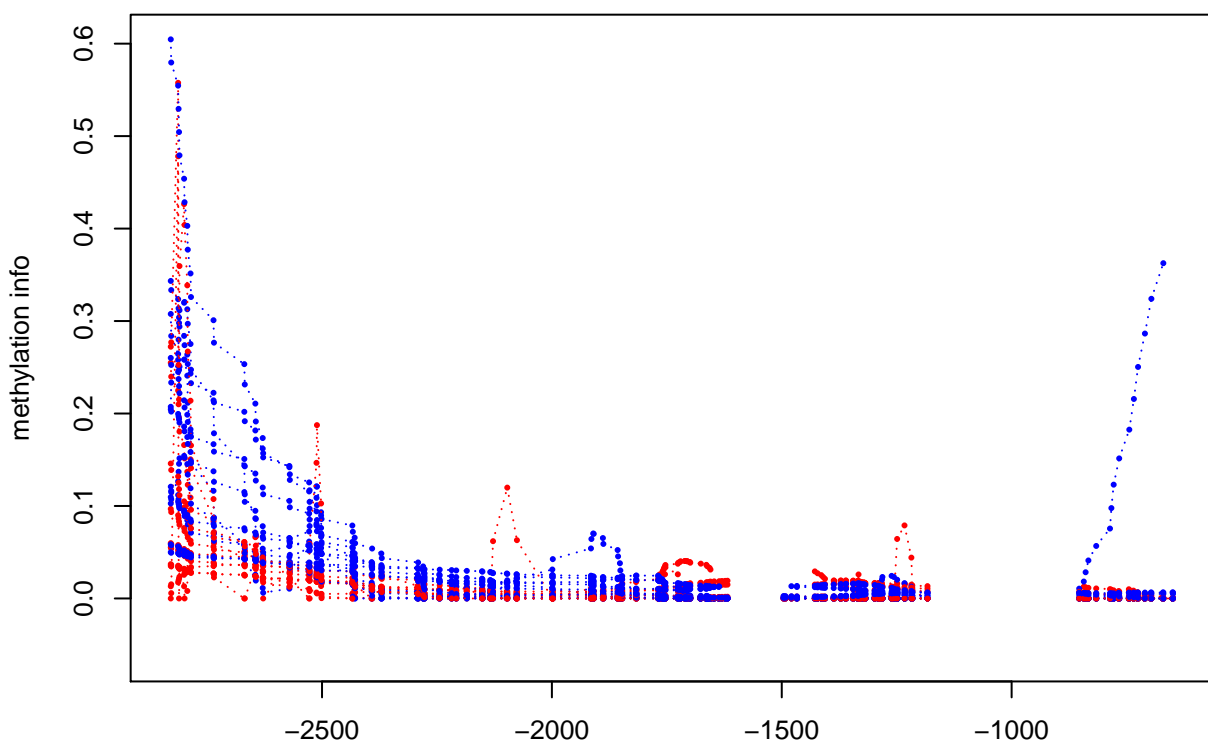

RNAseq logFC(UC-N)= 1.05

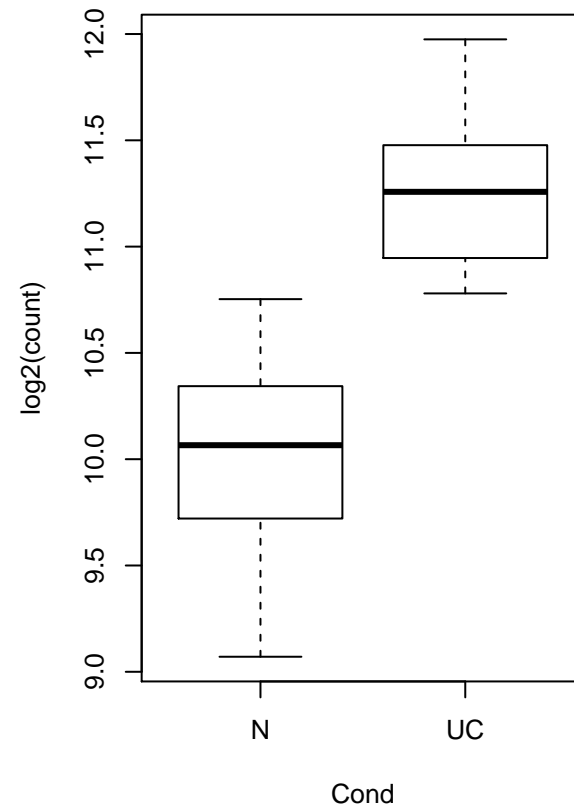

BISPR average UC-N %methylation max=-14.18% min=-30.57%

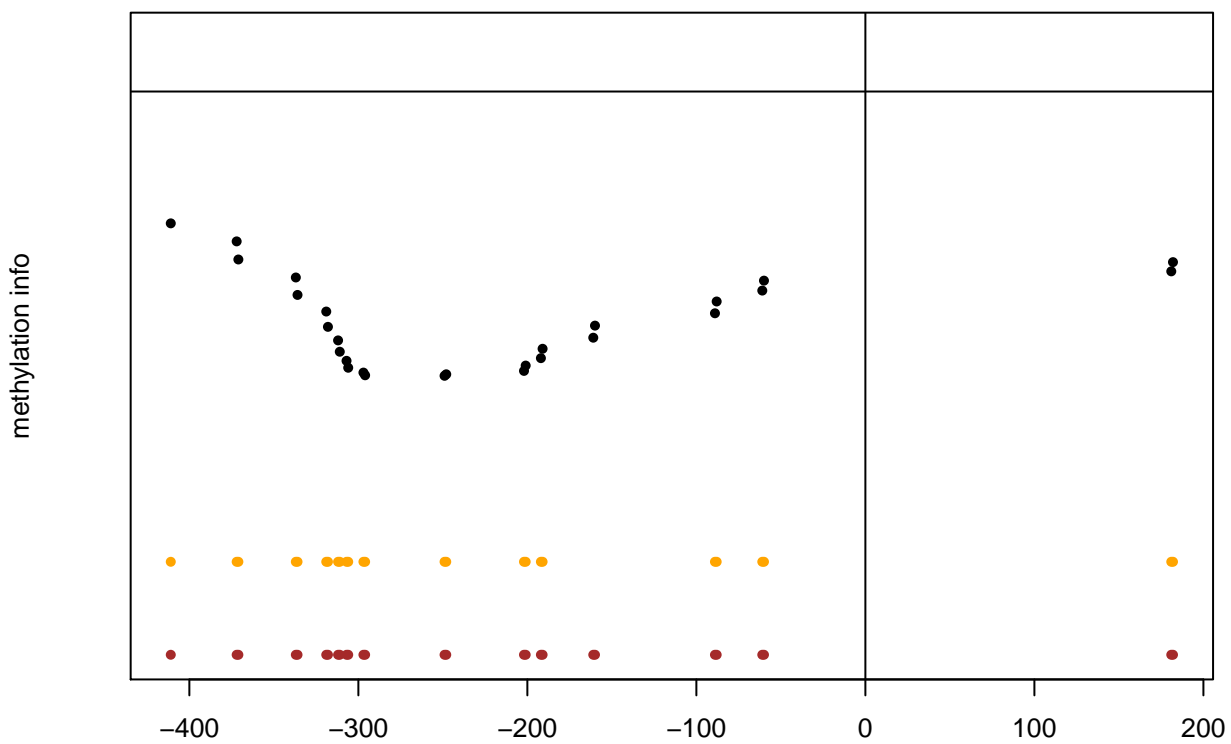

BISPR raw %methylation, red=UC, blue=Normal

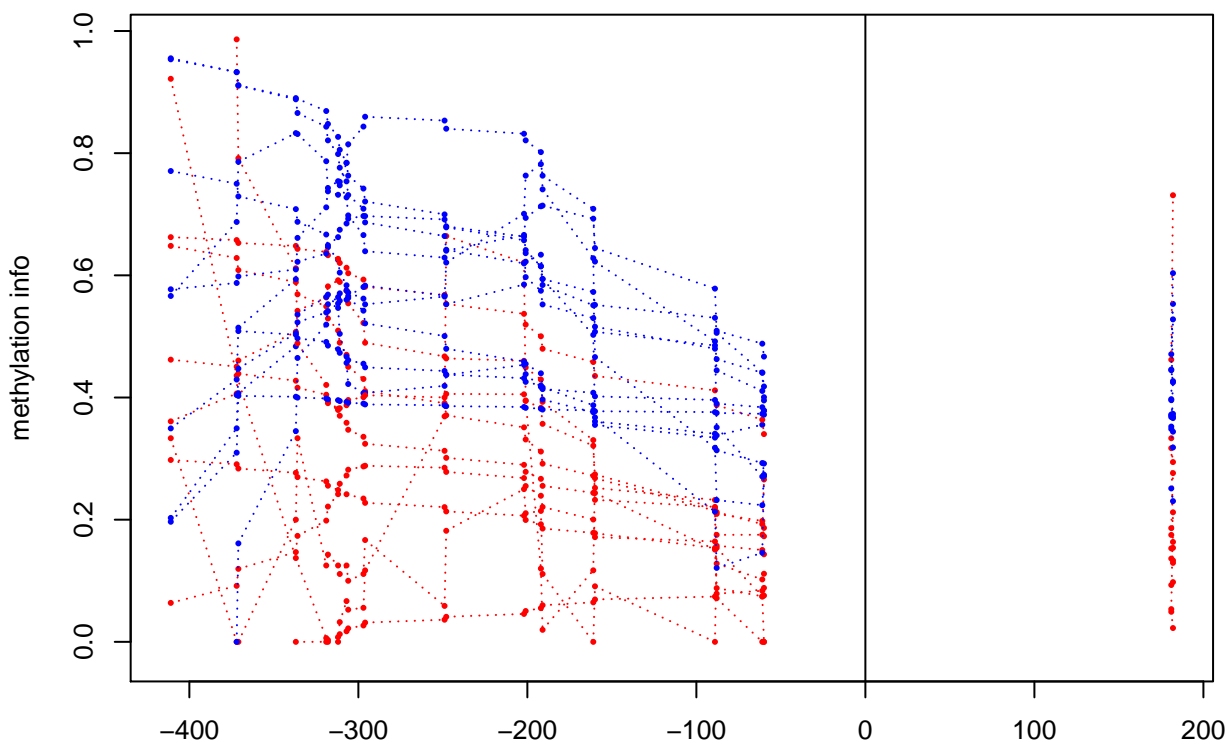

RNAseq logFC(UC-N)= 1.37

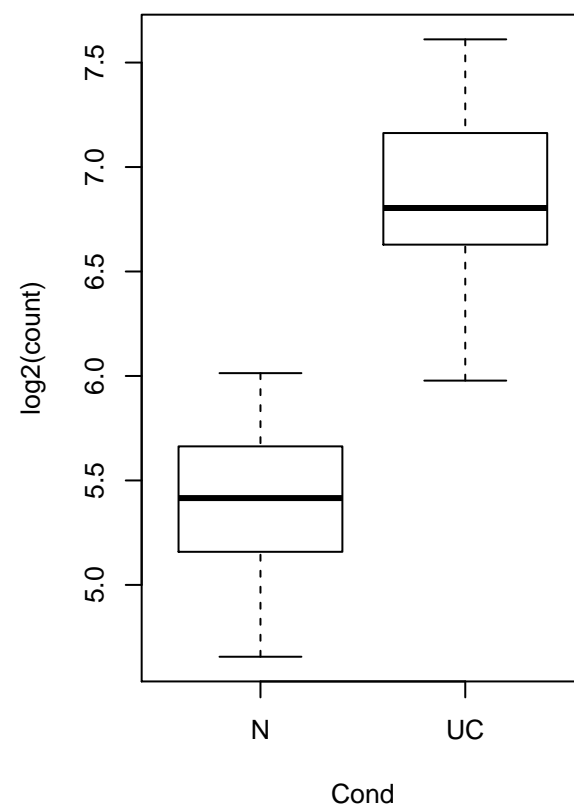

BLK average UC-N %methylation max=-10.15% min=-21.51%

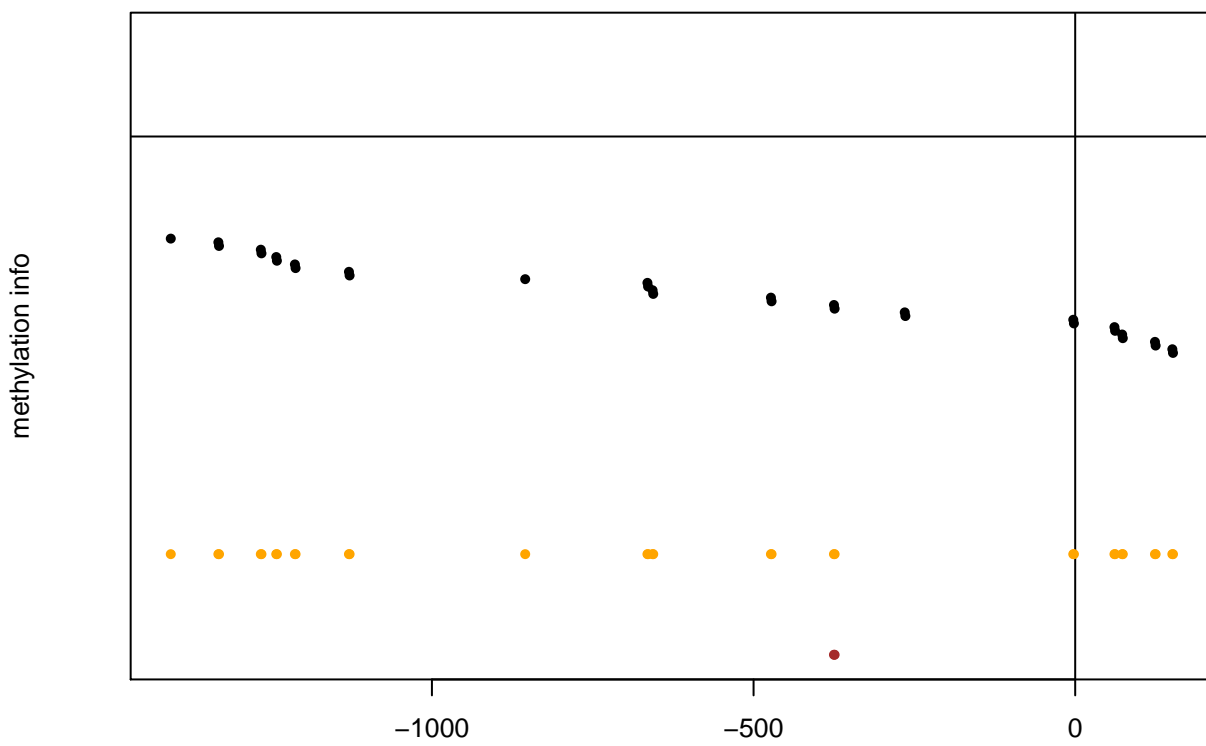

BLK raw %methylation, red=UC, blue=Normal

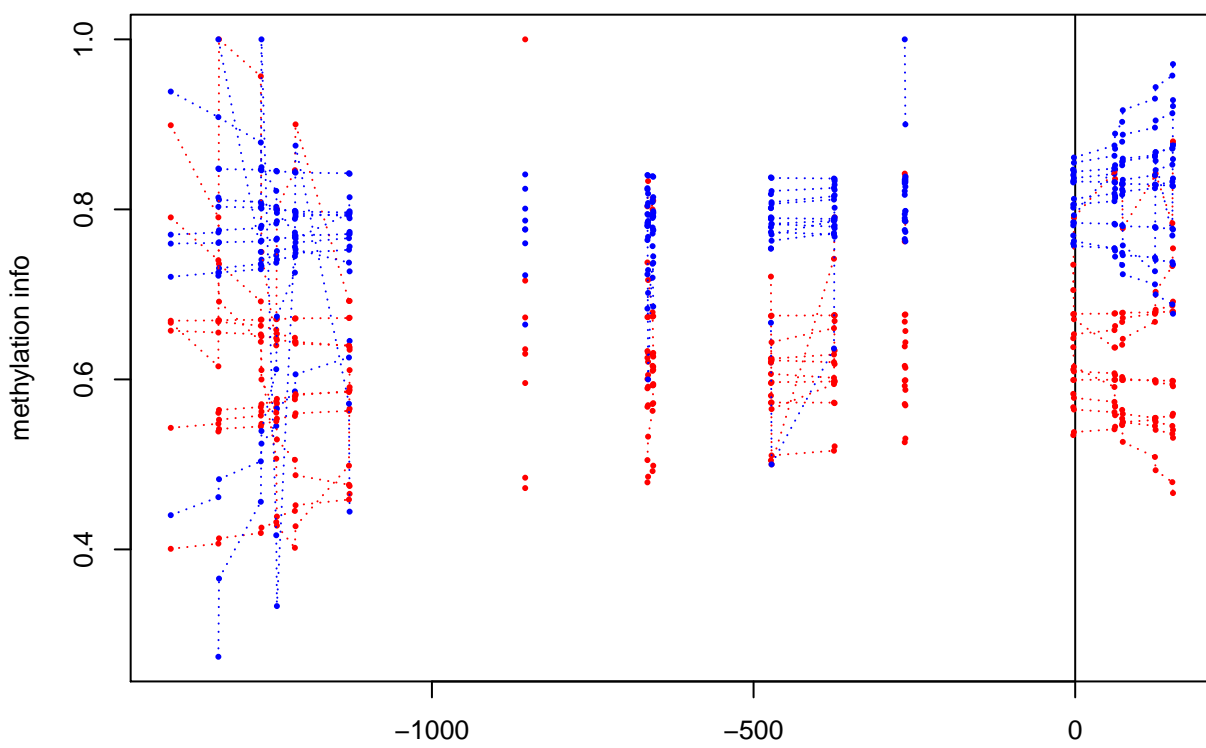

RNAseq logFC(UC-N)= 1.56

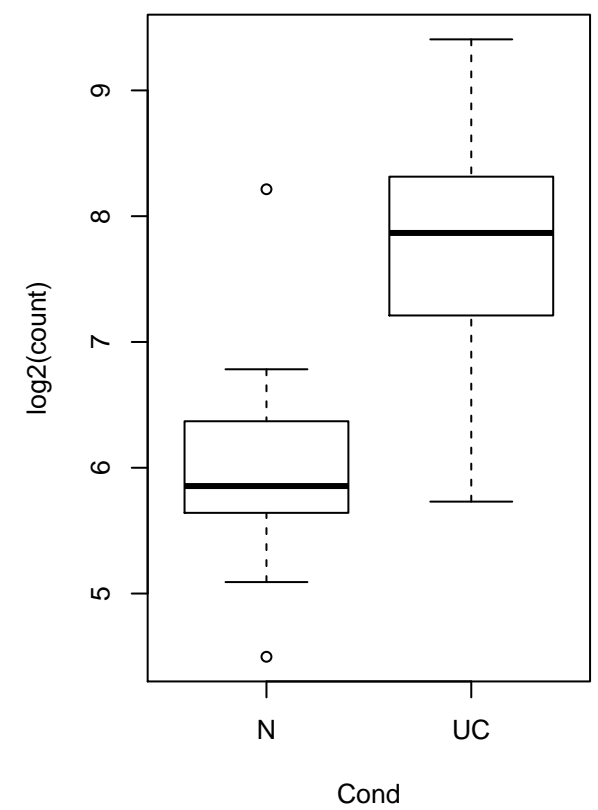

BRINP3 average UC-N %methylation max=23.81% min=-26.98%

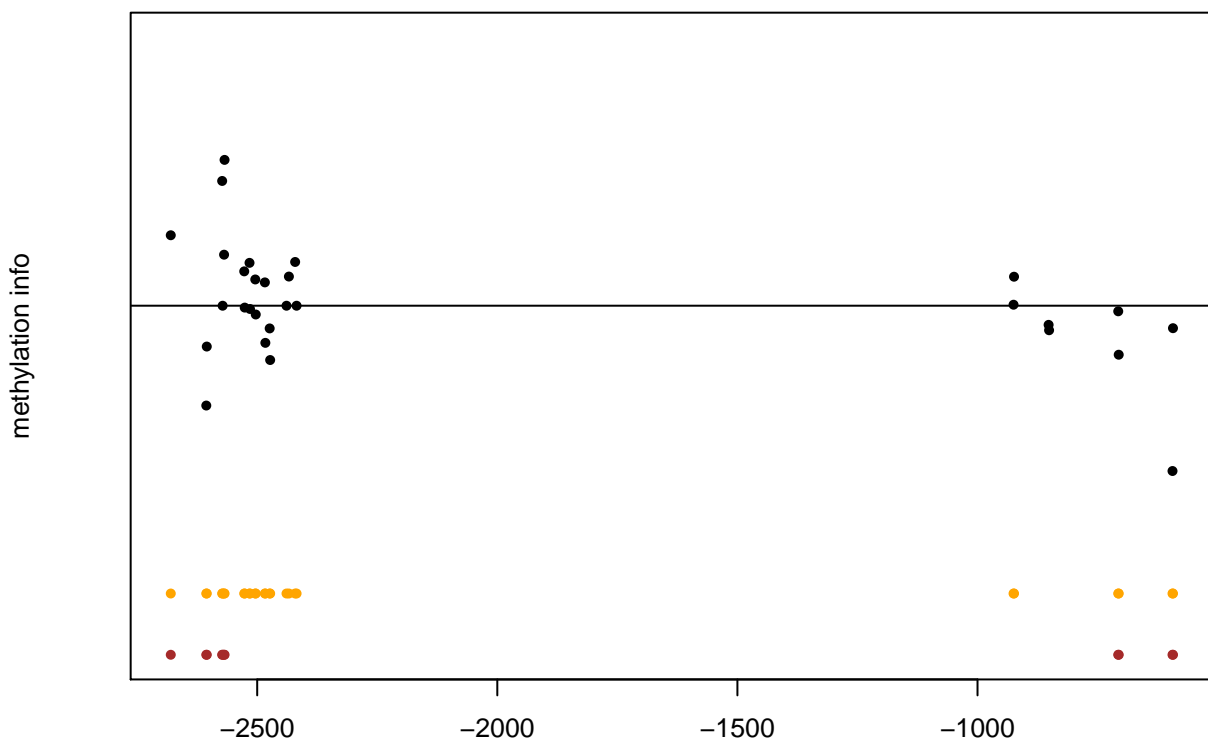

BRINP3 raw %methylation, red=UC, blue=Normal

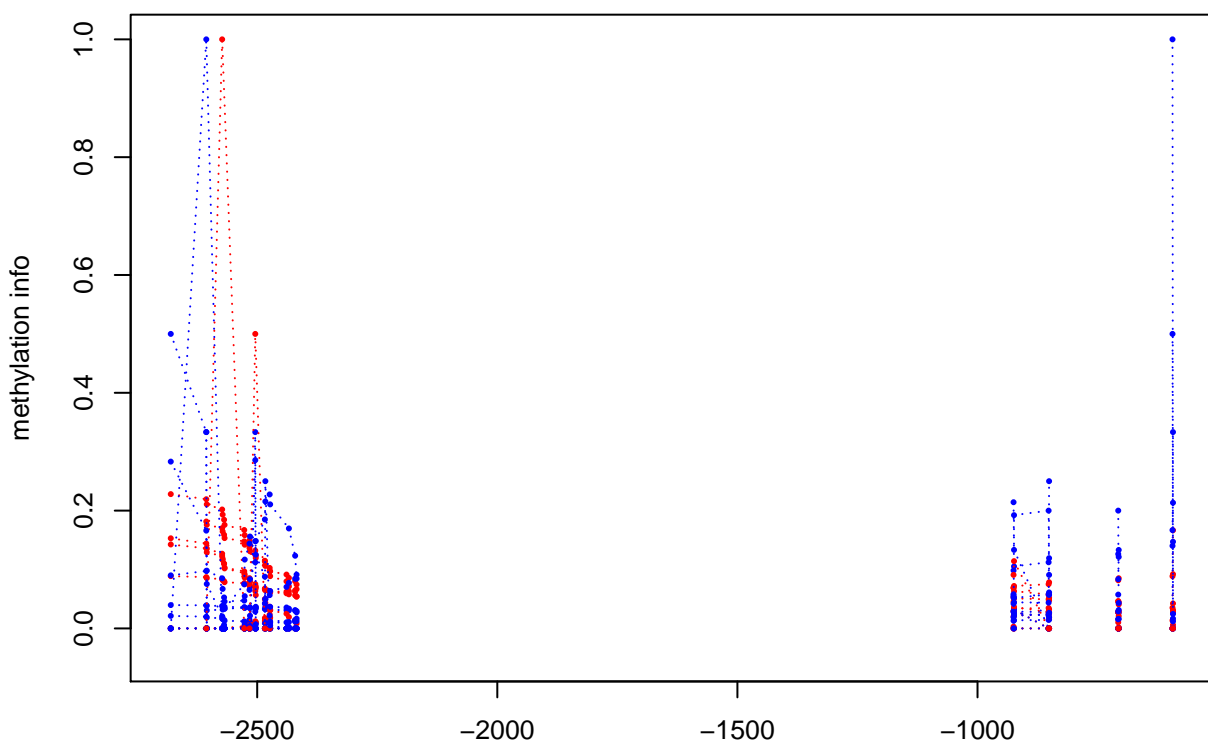

RNAseq logFC(UC-N) = -1.74

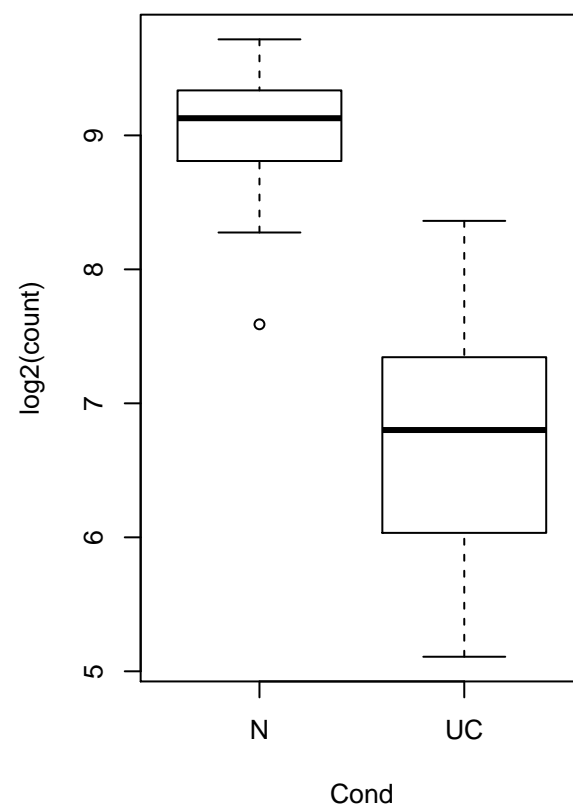

**BTLA average UC-N %methylation max=-25.48% min=-30.41%**

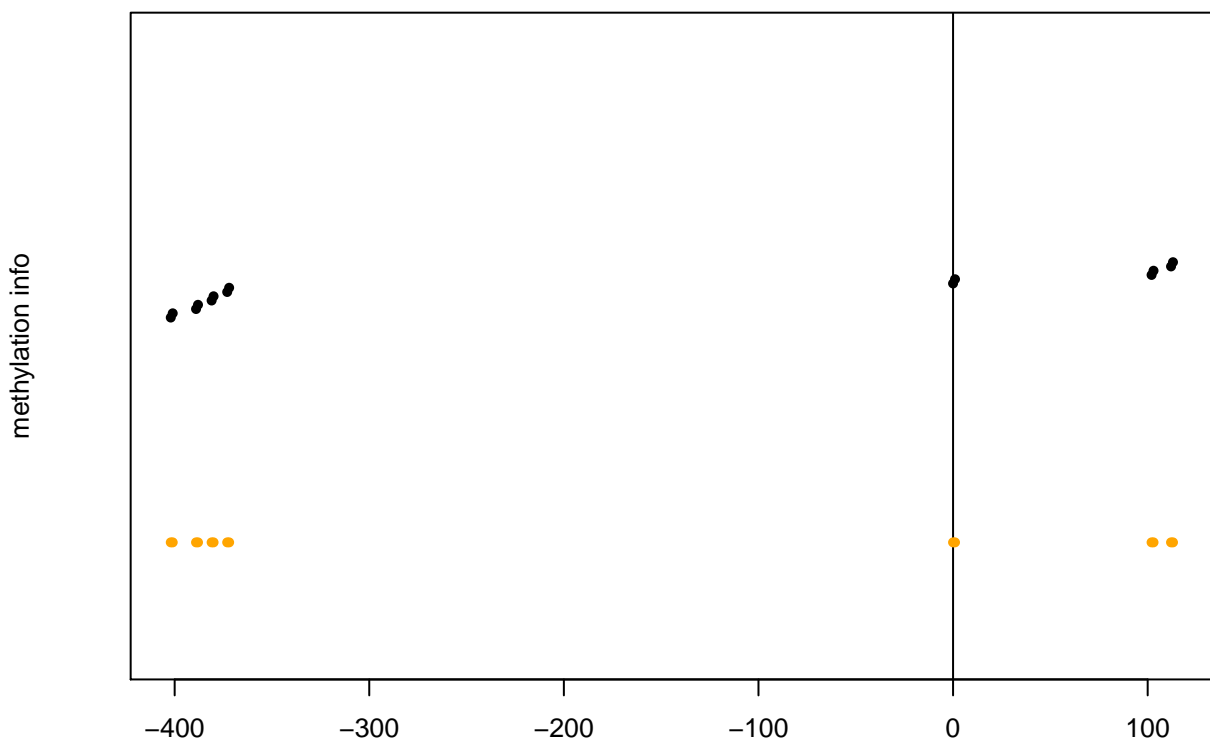

**BTLA raw %methylation, red=UC, blue=Normal**

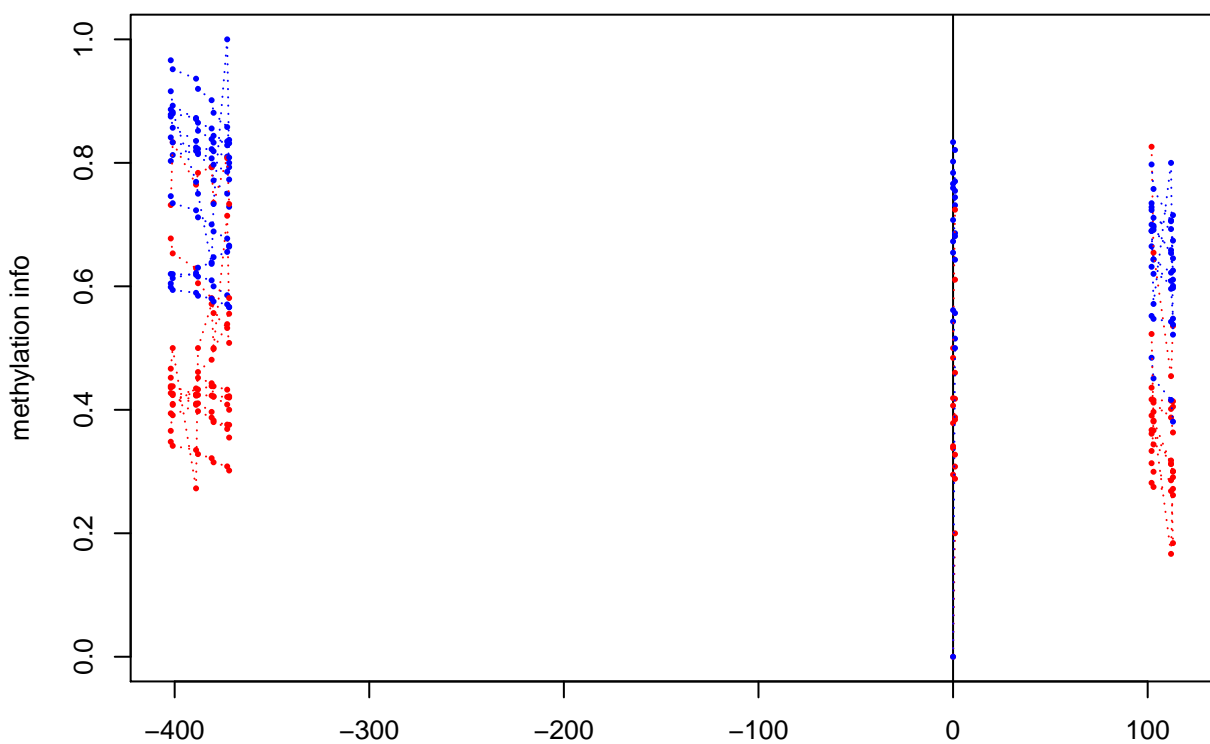

**RNAseq logFC(UC-N)= 1.14**

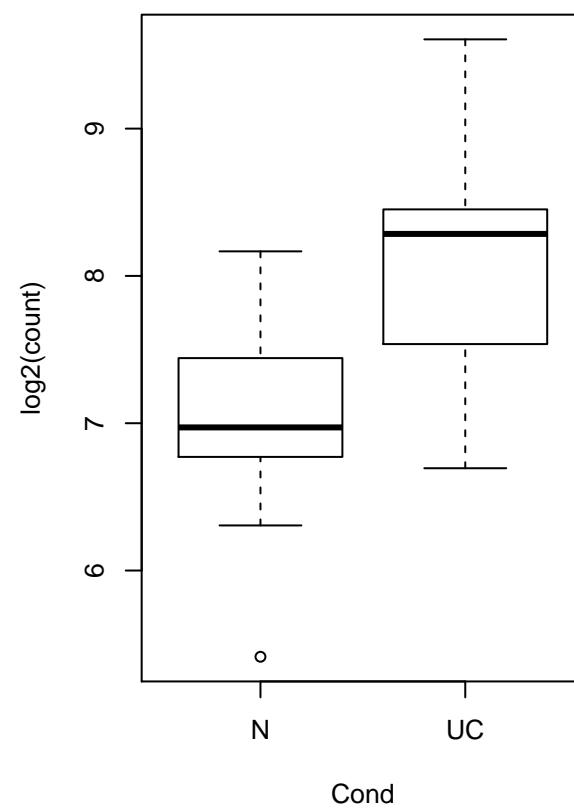

BTNL3 average UC-N %methylation max=29.77% min=-8.44%

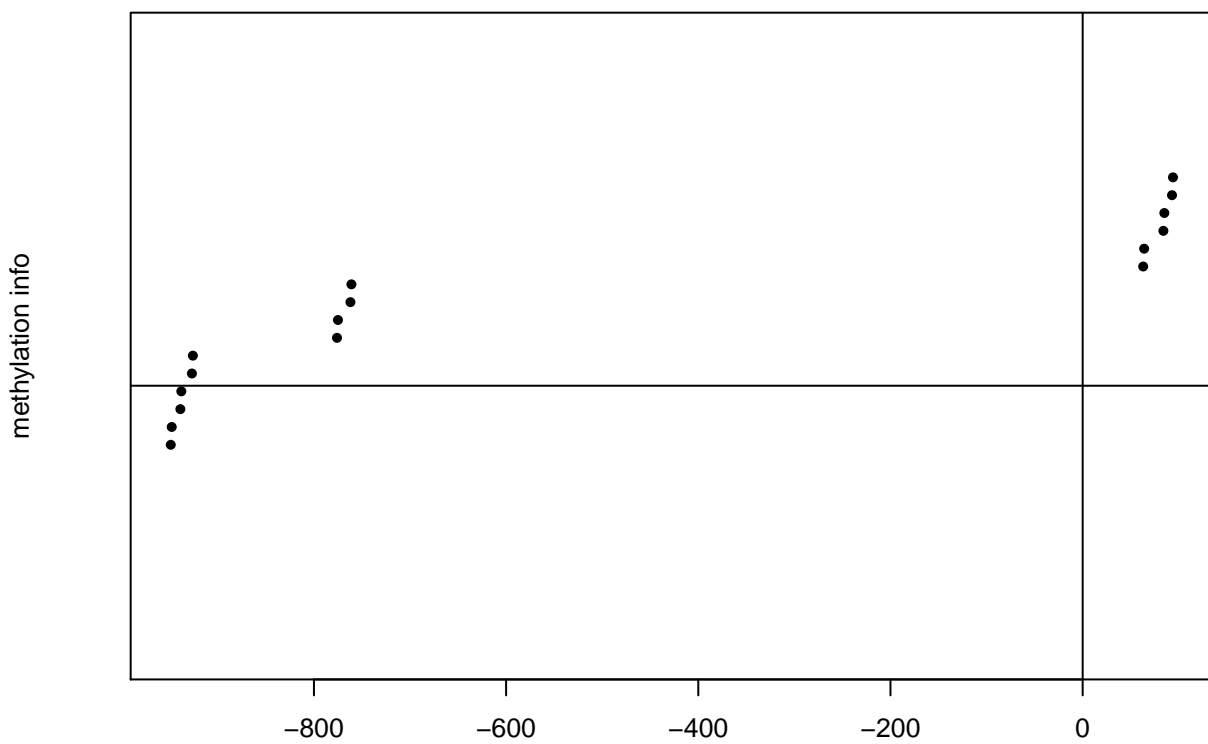

BTNL3 raw %methylation, red=UC, blue=Normal

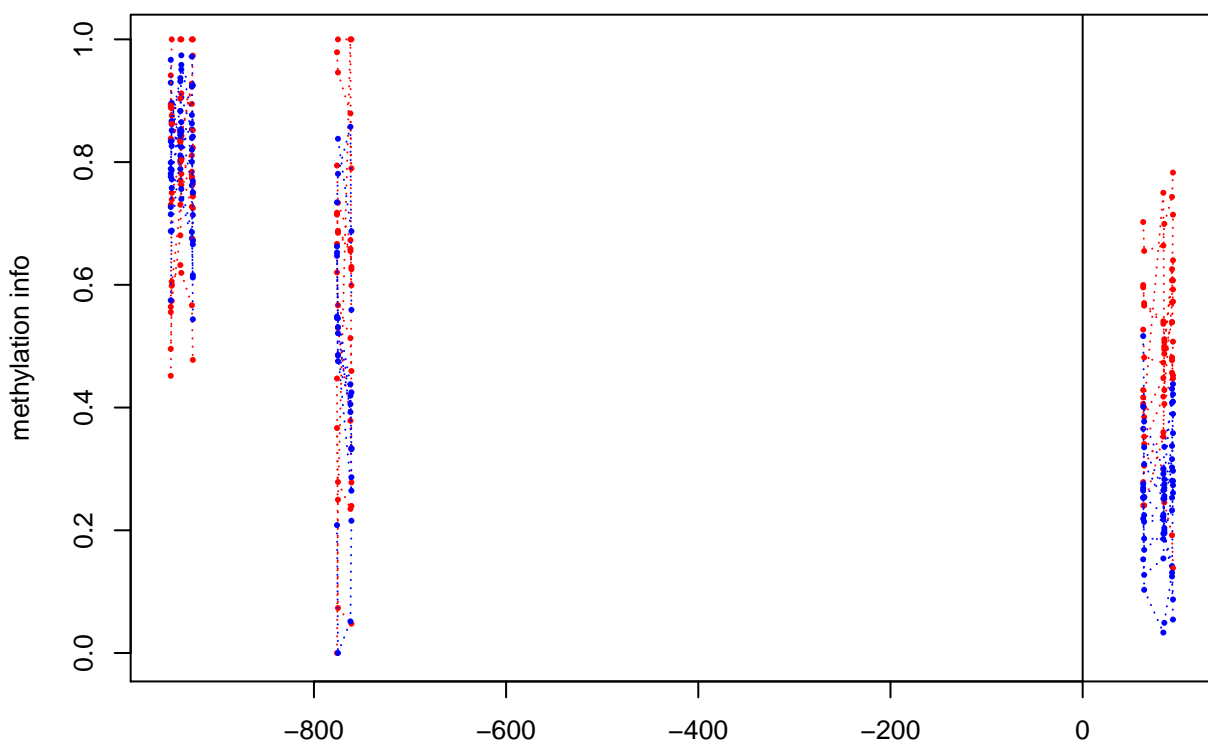

RNAseq logFC(UC-N)= -1.31

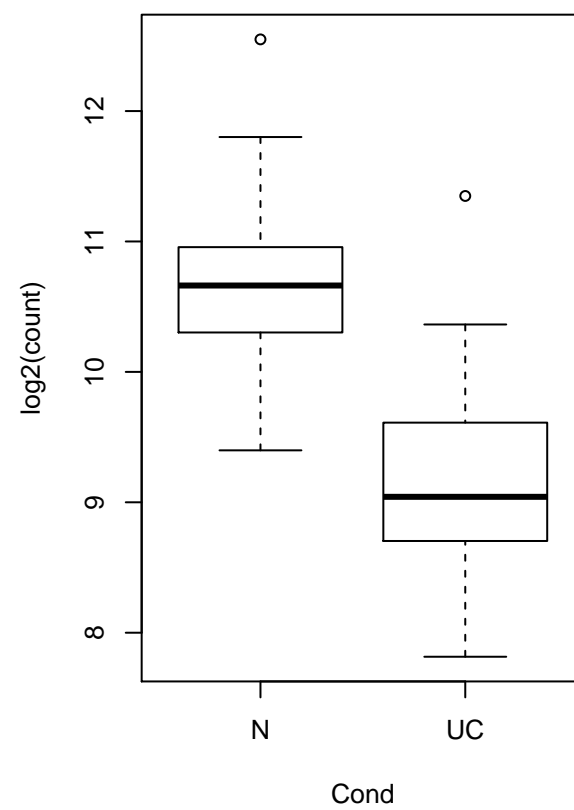

BTNL8 average UC-N %methylation max=13.69% min=-6.9%

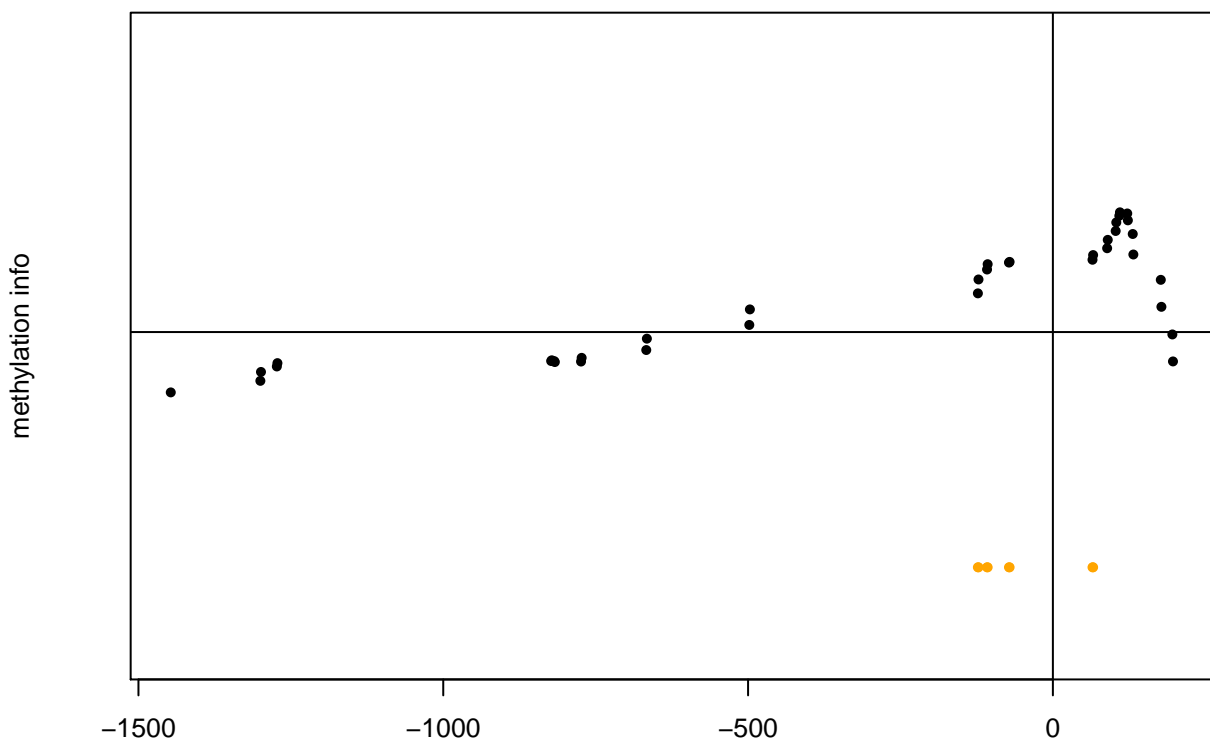

BTNL8 raw %methylation, red=UC, blue=Normal

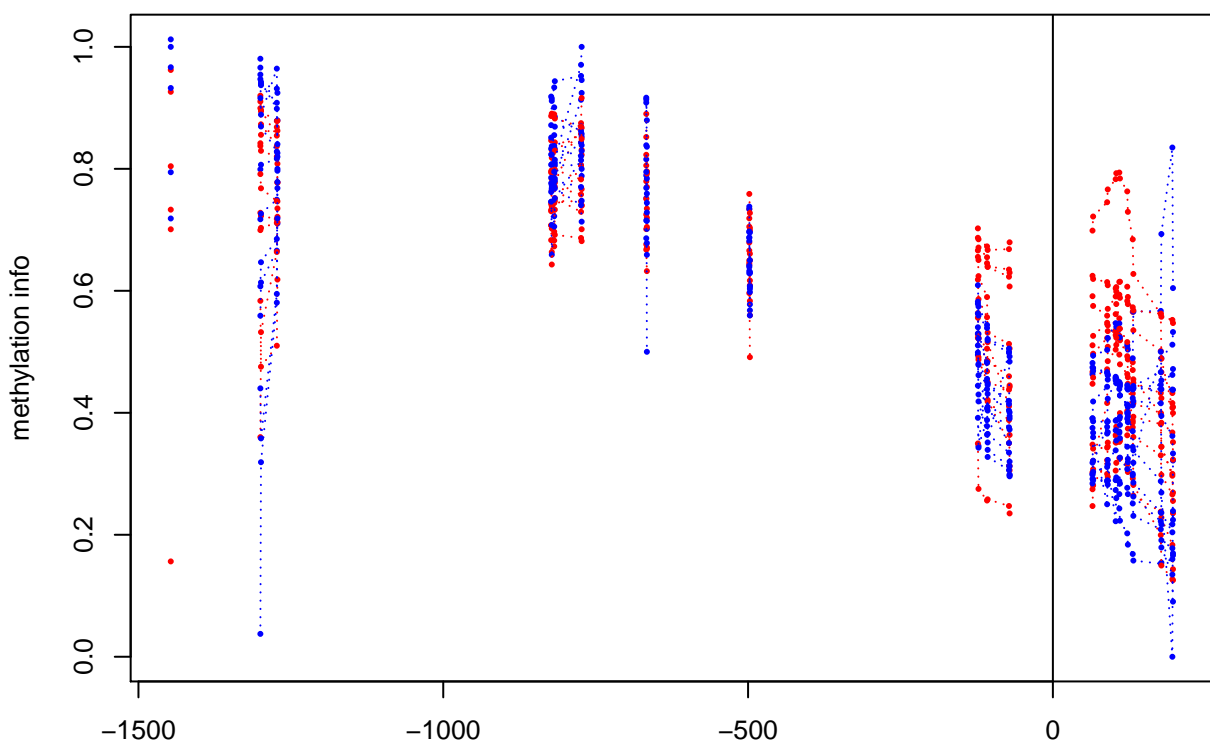

RNAseq logFC(UC-N)= -1.41

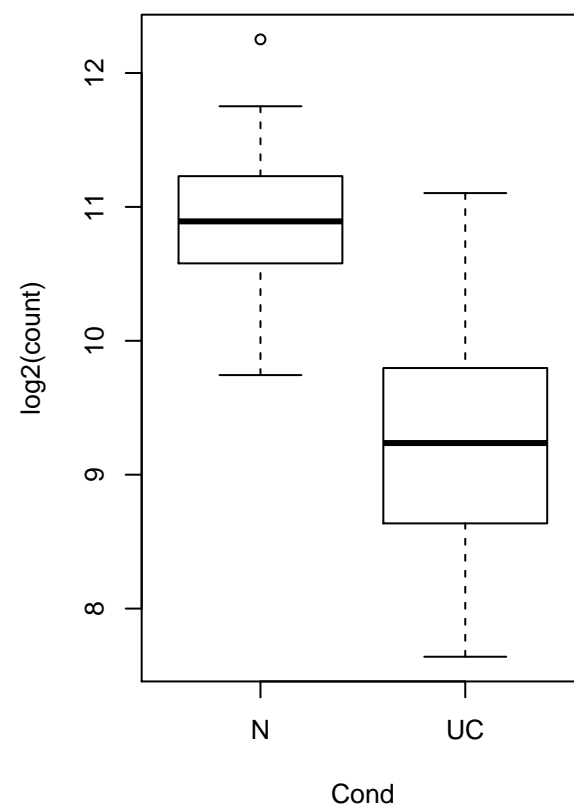



**BZRAP1-AS1 average UC-N %methylation max=-22.54% min=-27.3%**

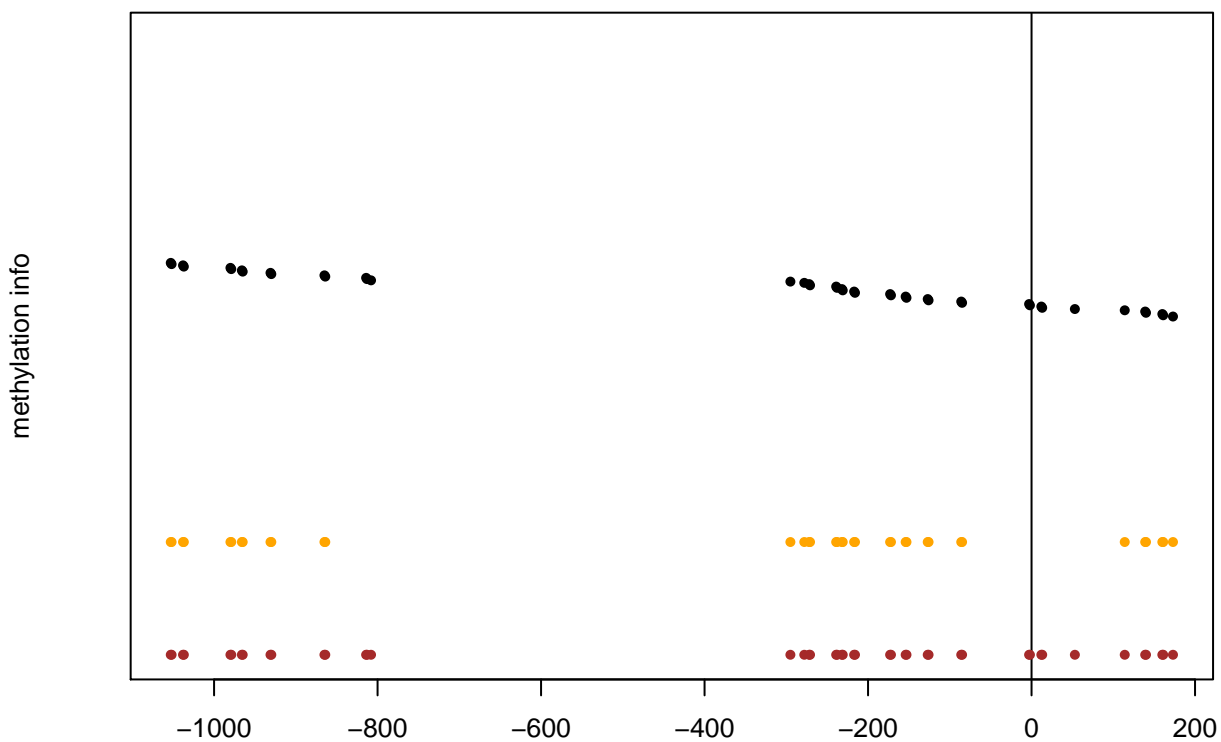

**BZRAP1-AS1 raw %methylation, red=UC, blue=Normal**

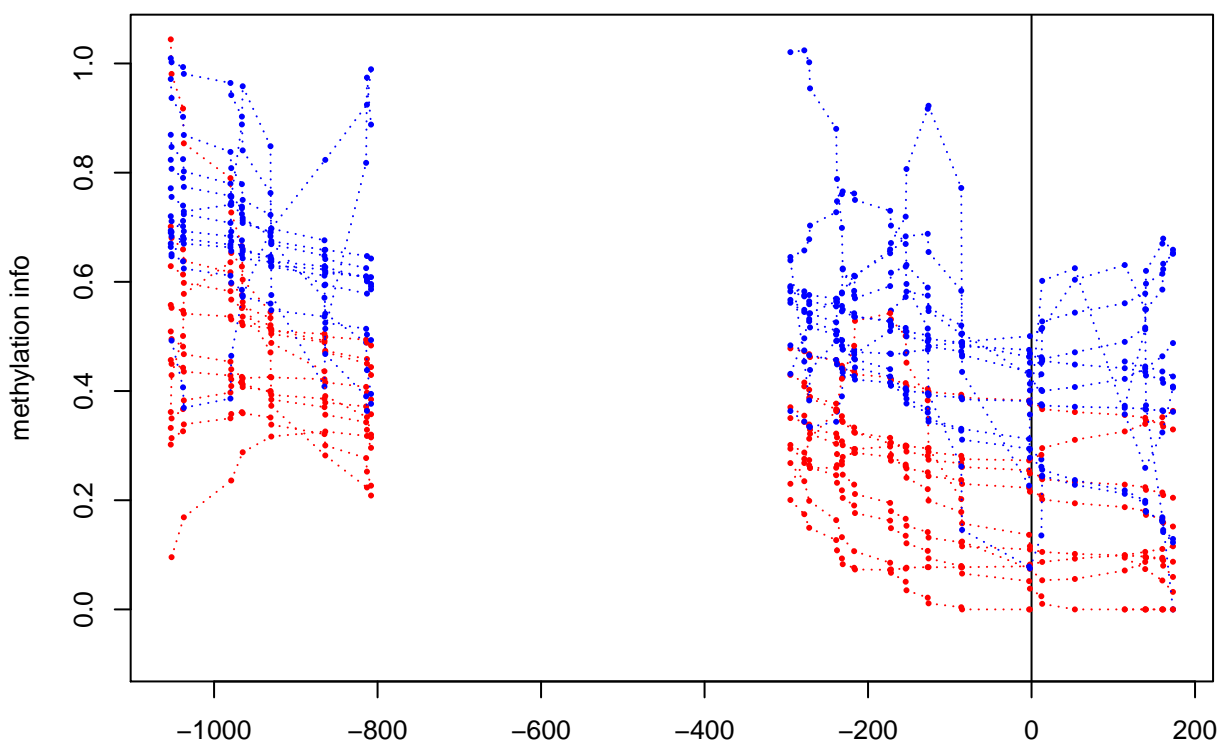

**RNAseq logFC(UC-N)= 1.07**

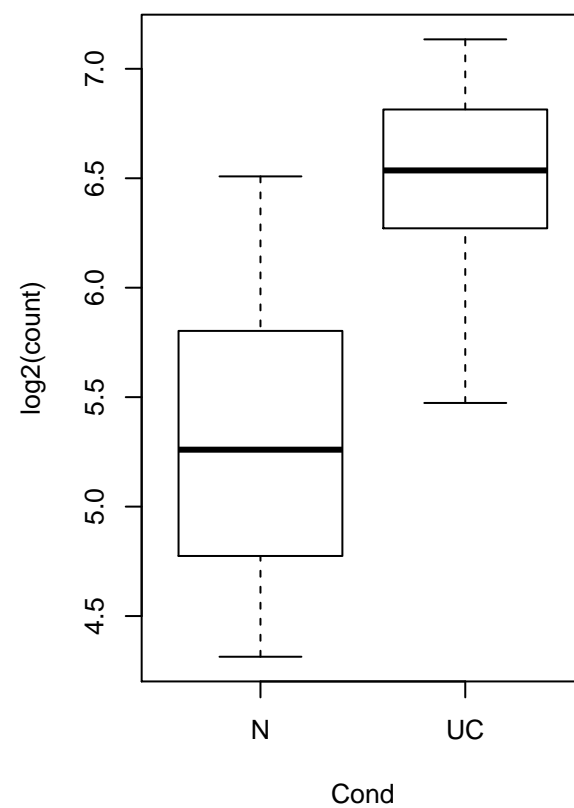

C11orf21 average UC-N %methylation max=-4.31% min=-31.35%

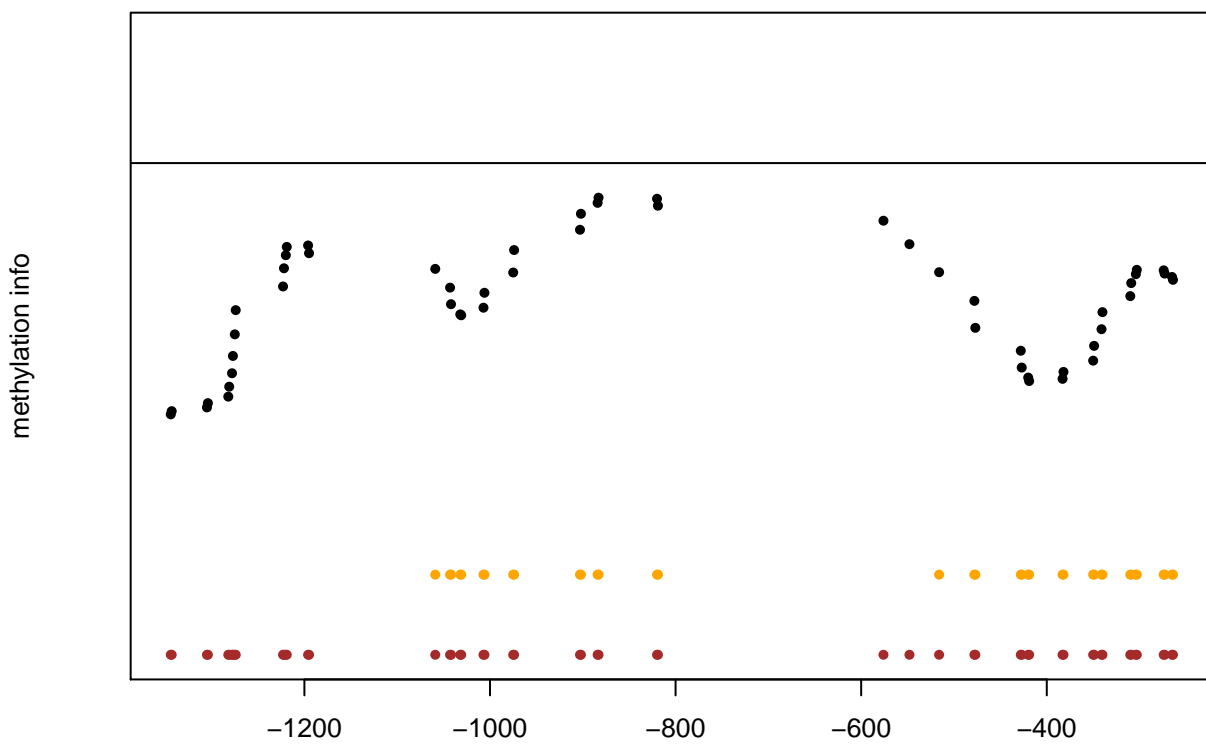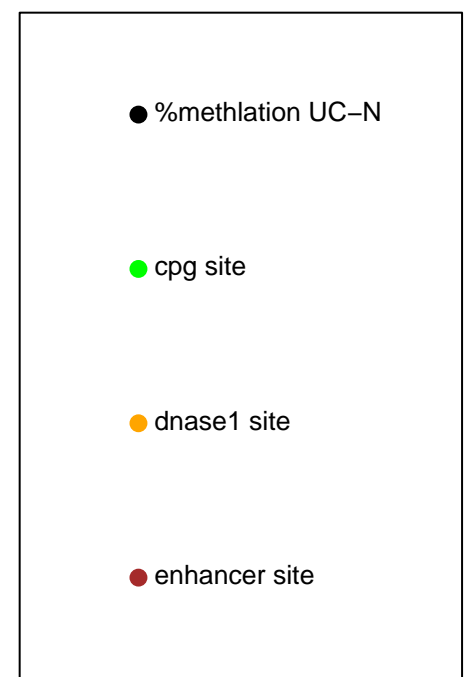

C11orf21 raw %methylation, red=UC, blue=Normal

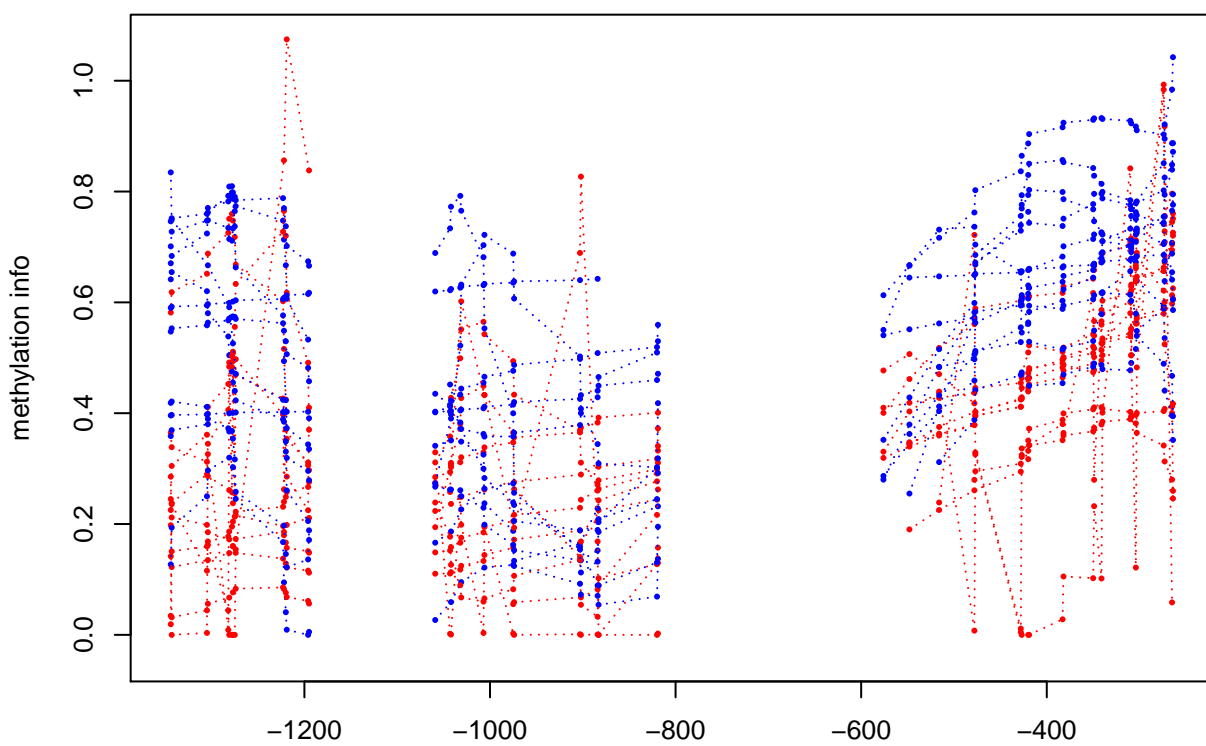

RNAseq logFC(UC-N)= 1.18

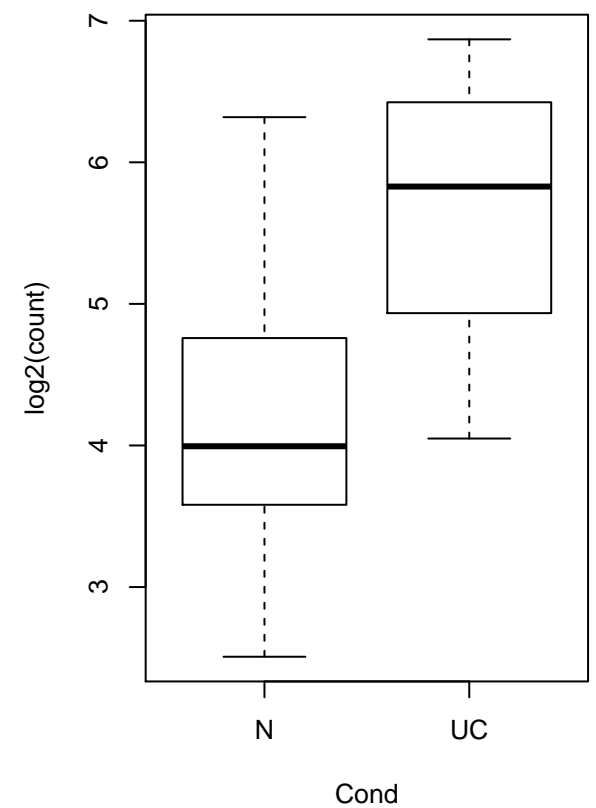

C16orf54 average UC-N %methylation max=-16.15% min=-51.35%

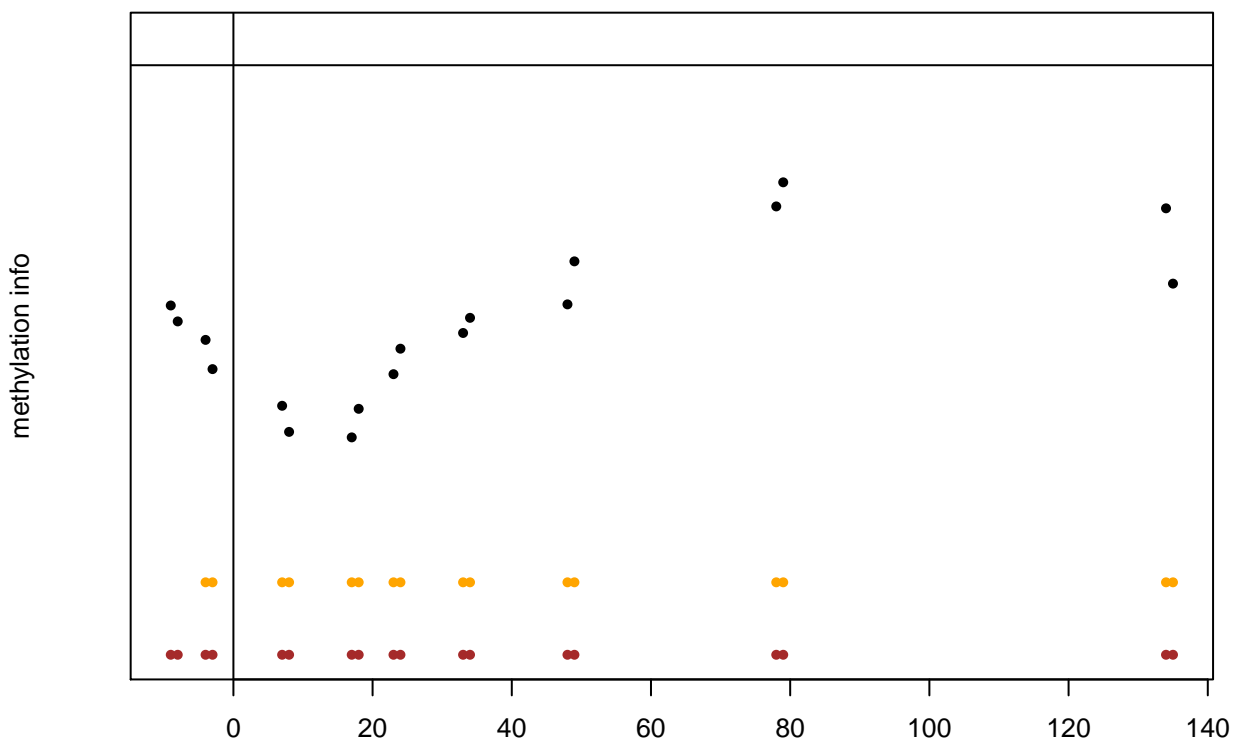

C16orf54 raw %methylation, red=UC, blue=Normal

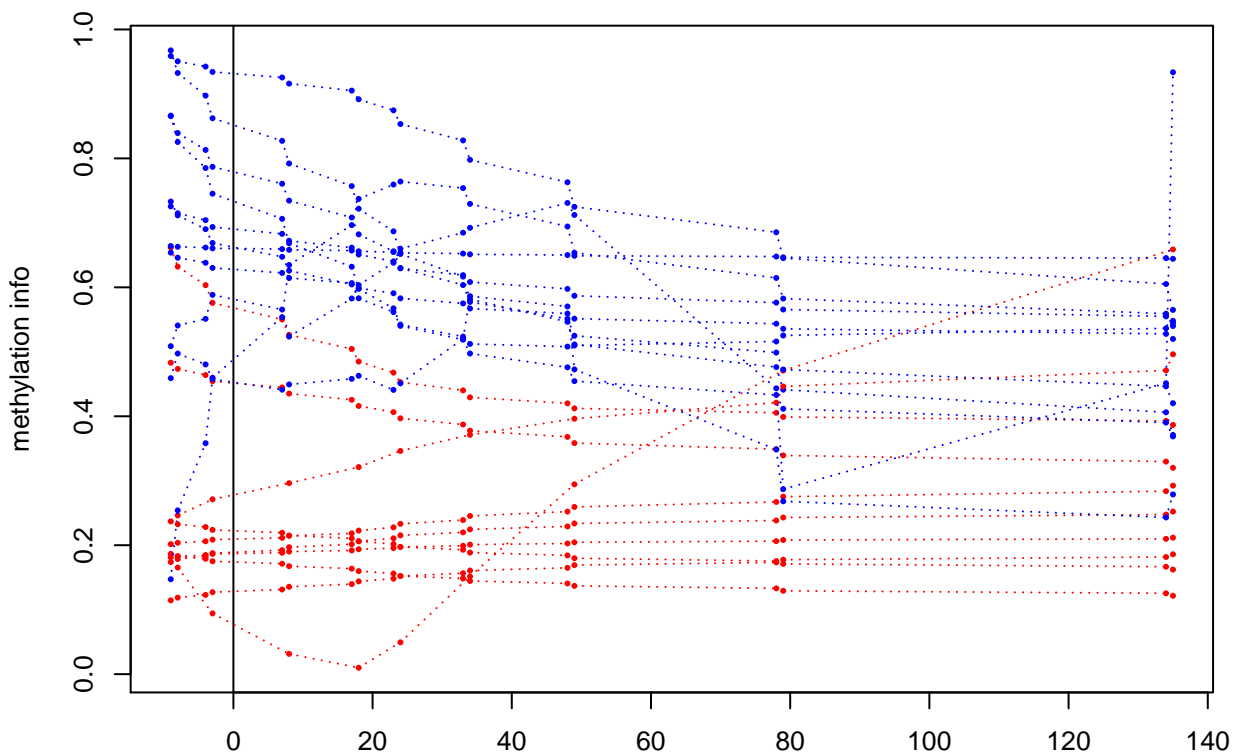

RNAseq logFC(UC-N)= 1.13

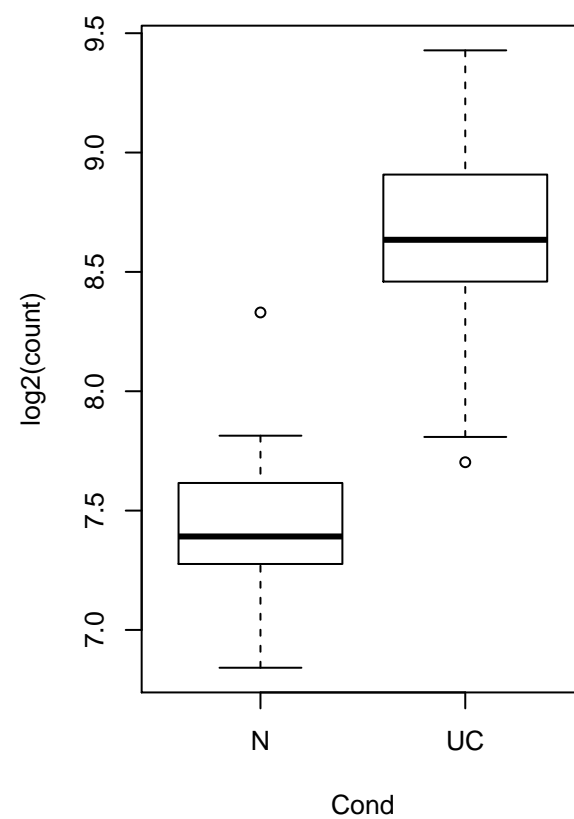

C2CD4A average UC-N %methylation max=-0.07% min=-13.02%

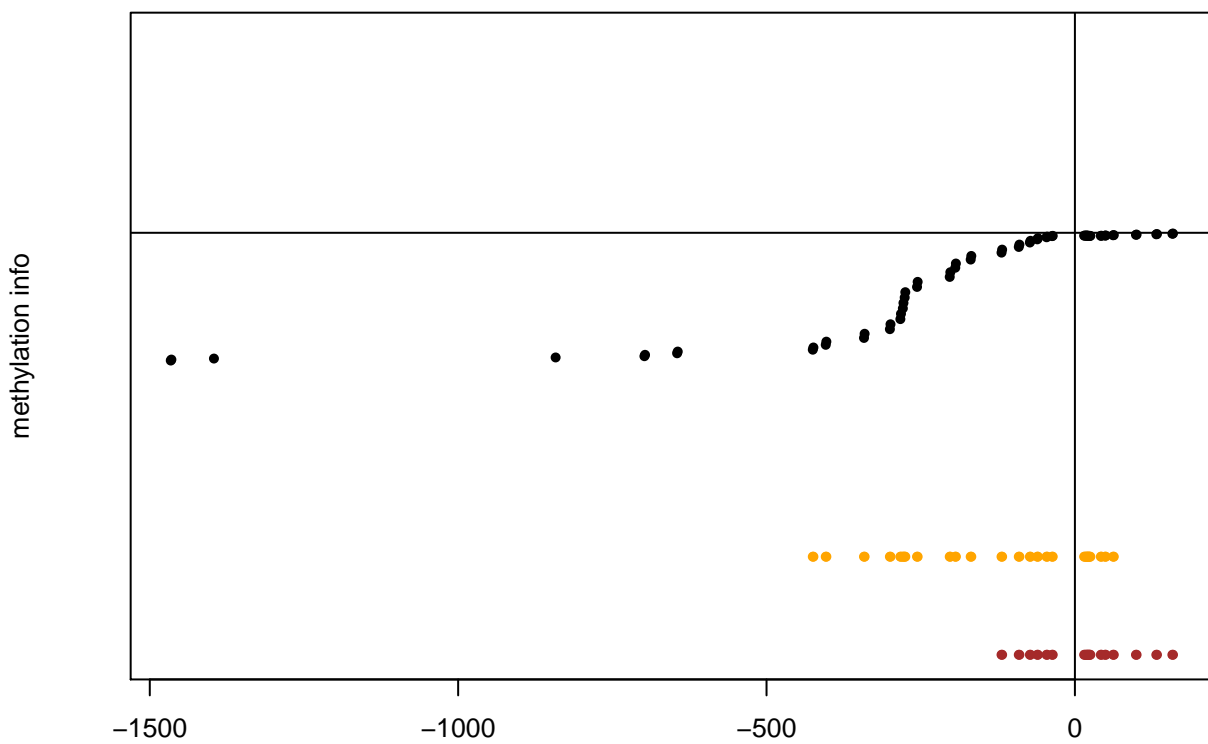

C2CD4A raw %methylation, red=UC, blue=Normal

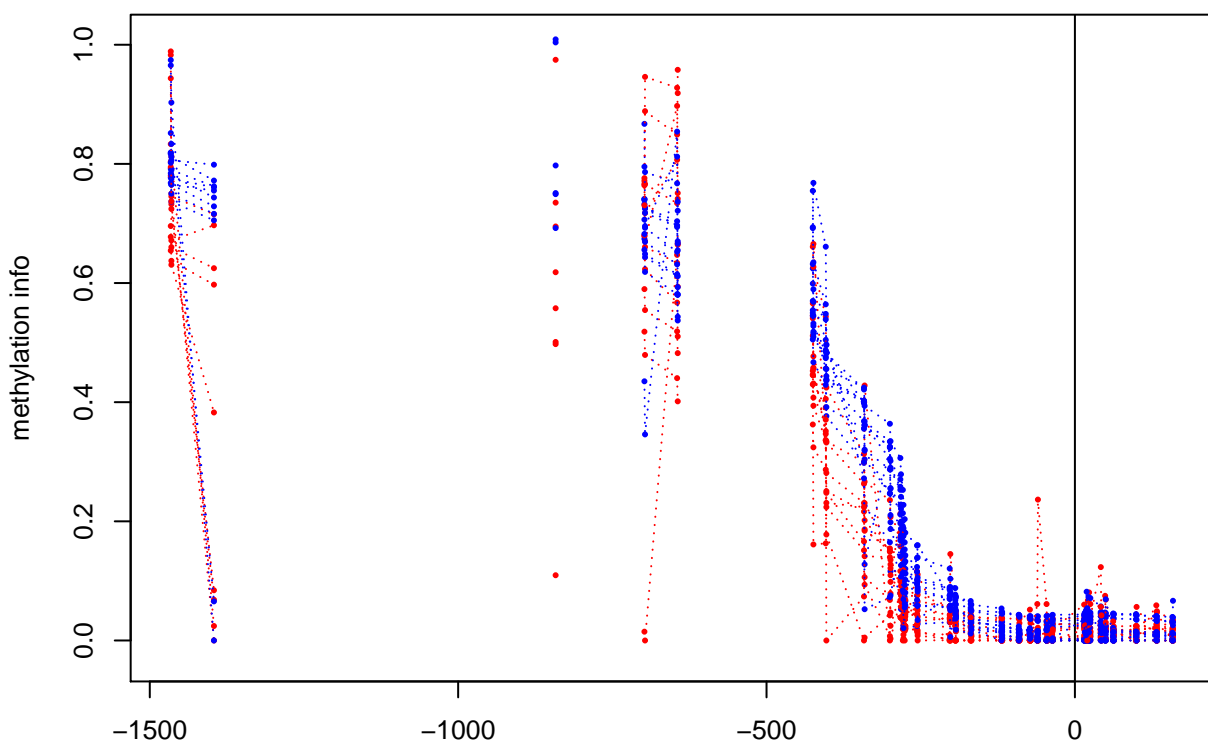

RNAseq logFC(UC-N)= 3.72

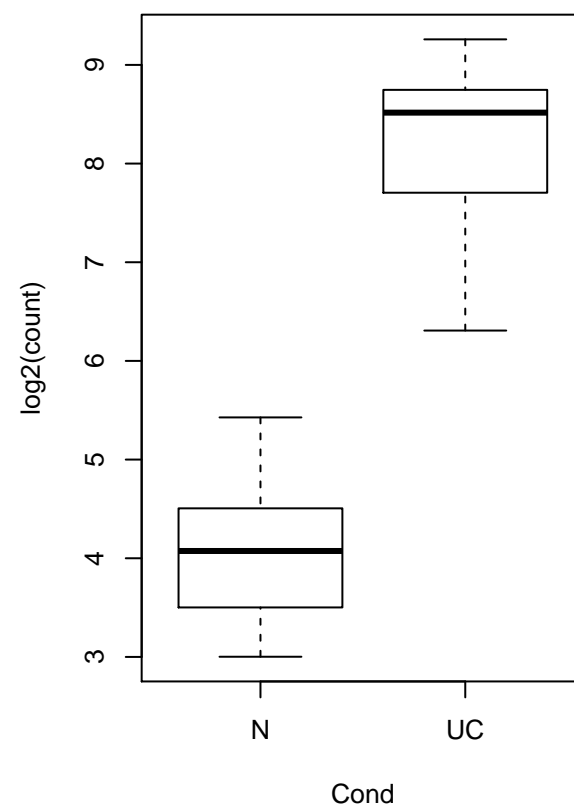

C2CD4B average UC-N %methylation max=0.41% min=-18.86%

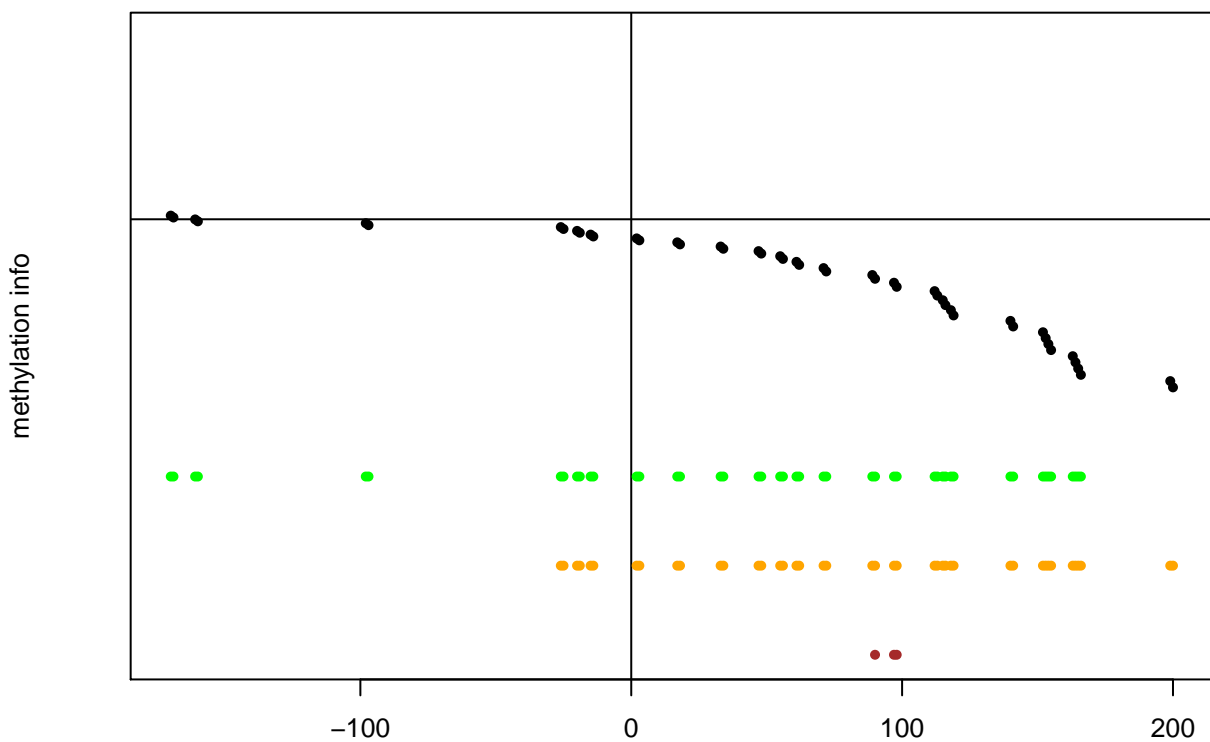

C2CD4B raw %methylation, red=UC, blue=Normal

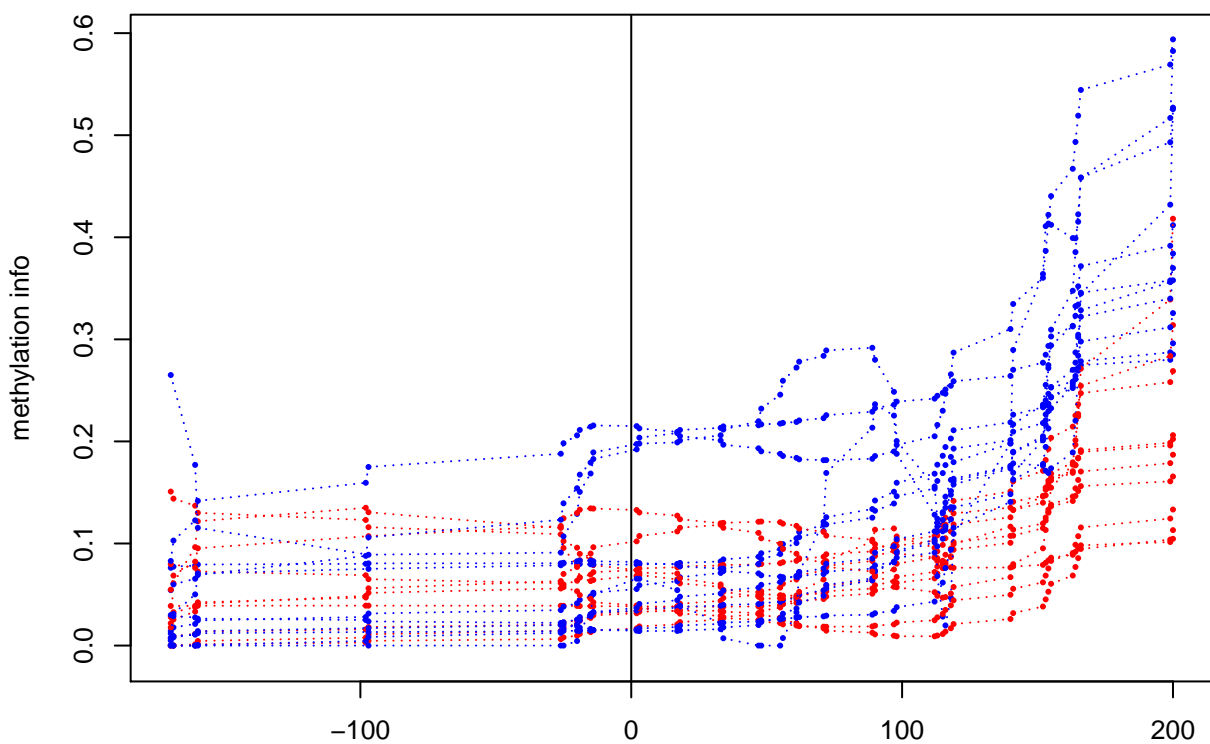

RNAseq logFC(UC-N)= 2.79

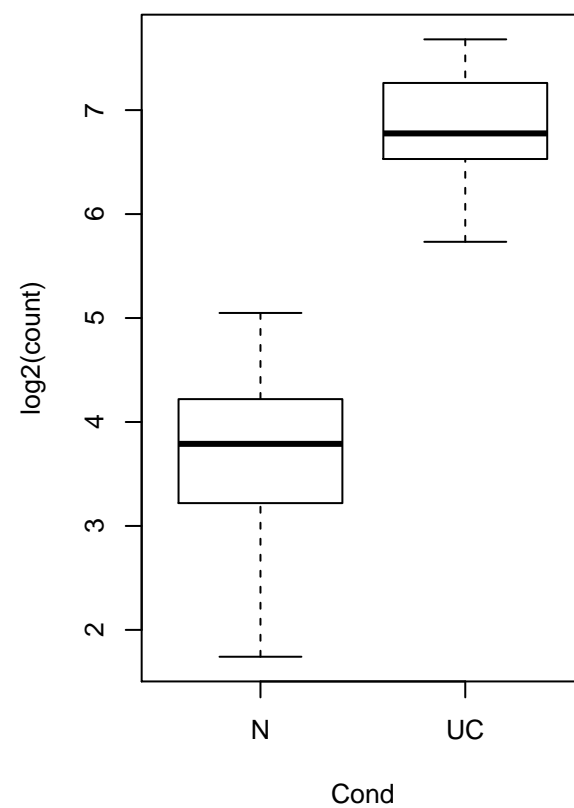

C4BPA average UC-N %methylation max=11.04% min=-13.4%

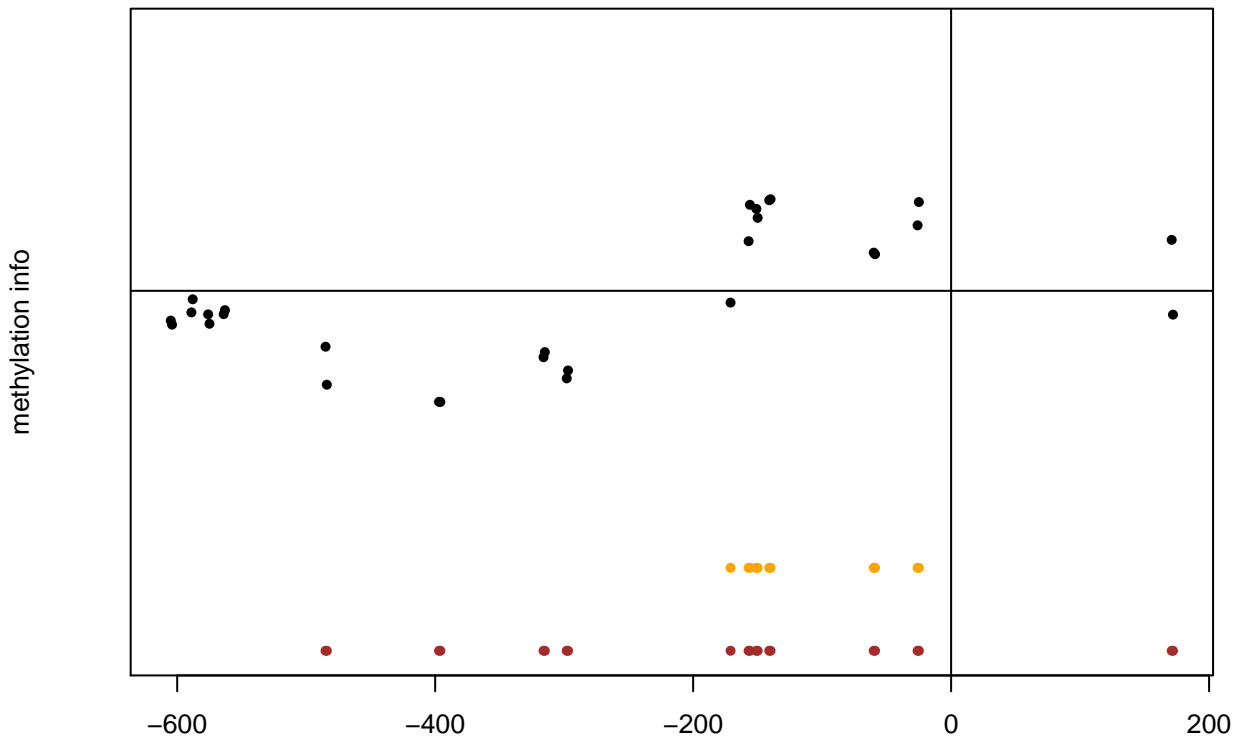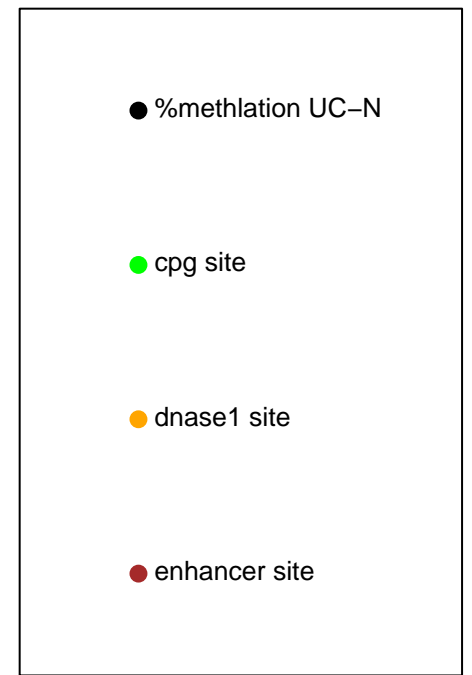

C4BPA raw %methylation, red=UC, blue=Normal

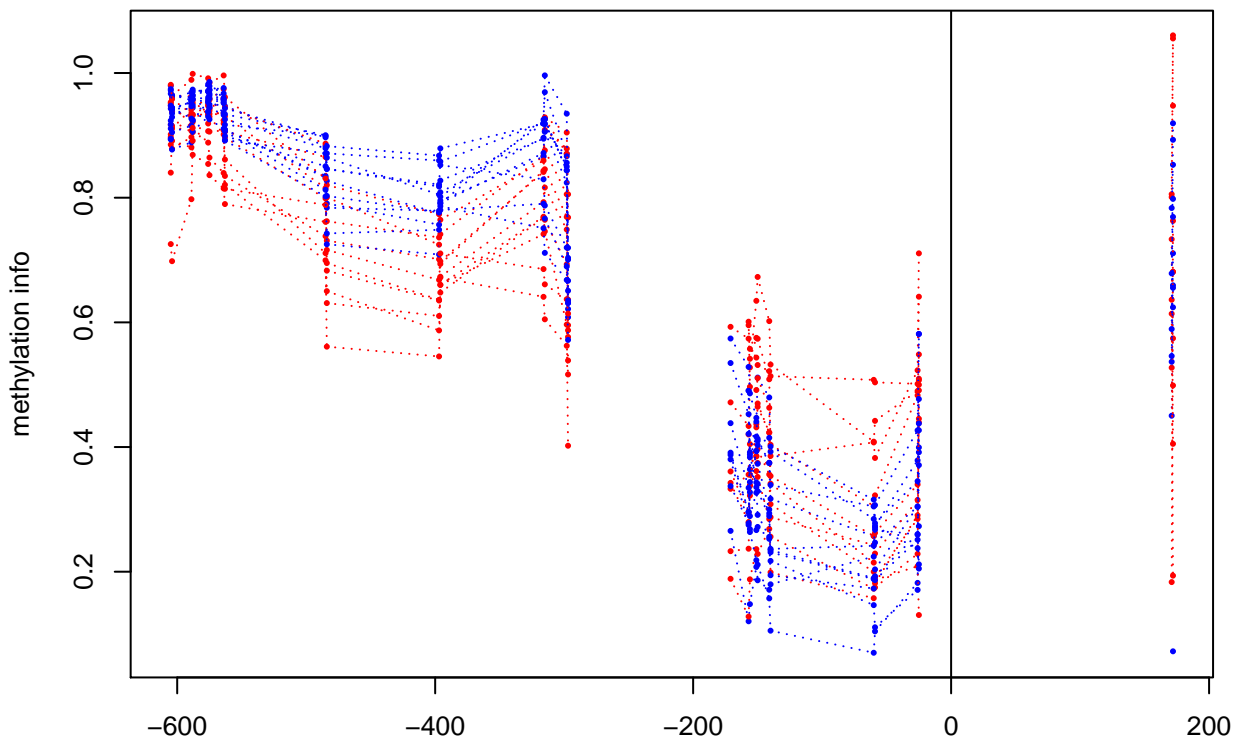

RNAseq logFC(UC-N)= 1.96

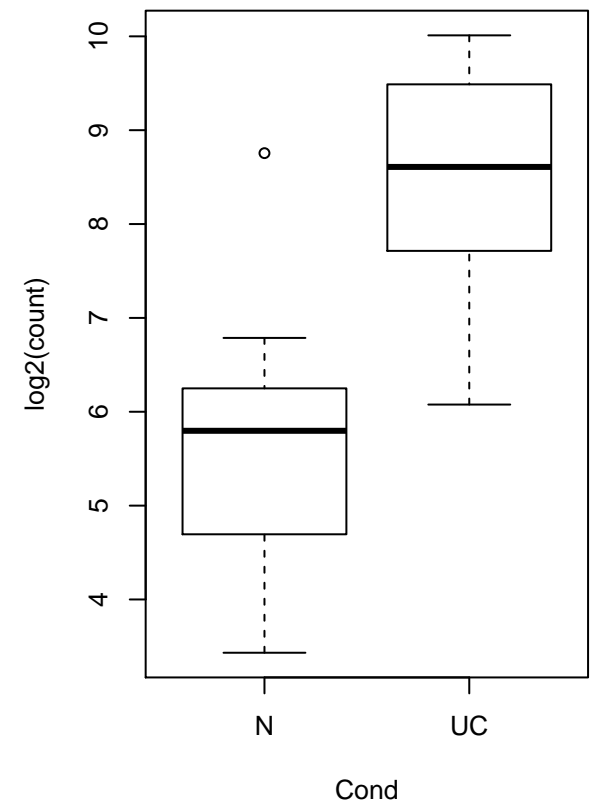

C5AR1 average UC-N %methylation max=-0.77% min=-18.68%

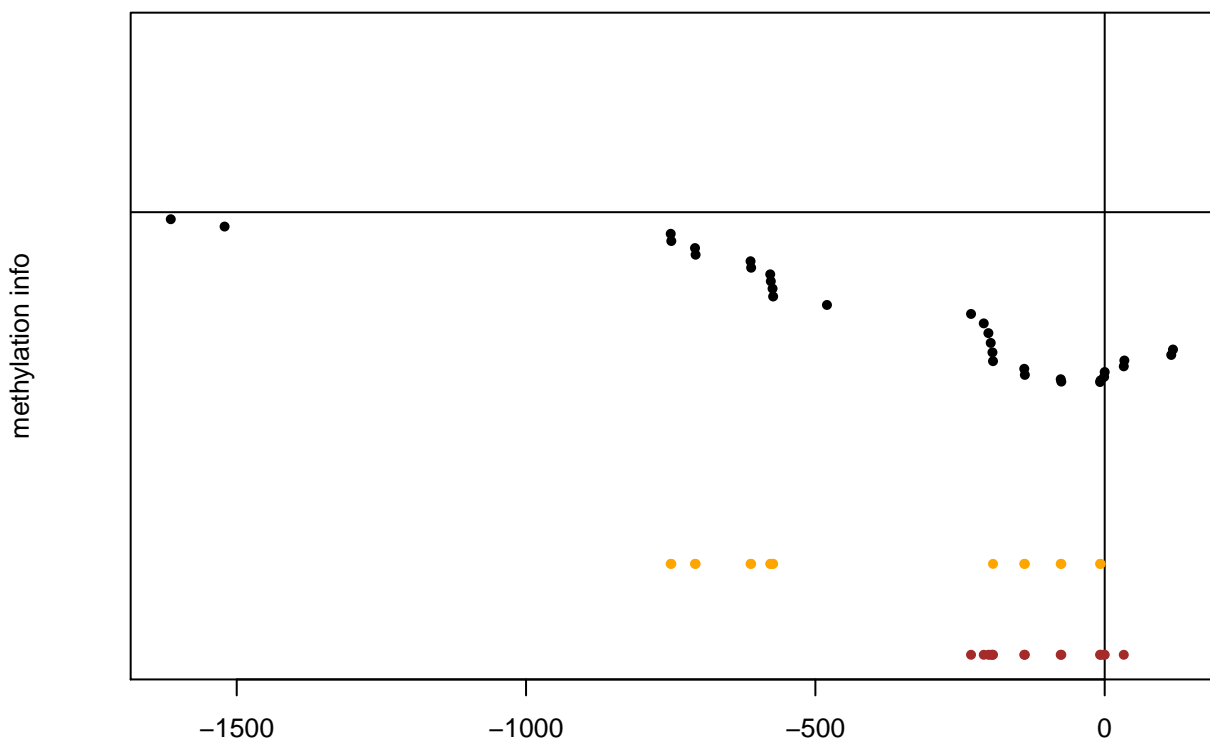

C5AR1 raw %methylation, red=UC, blue=Normal

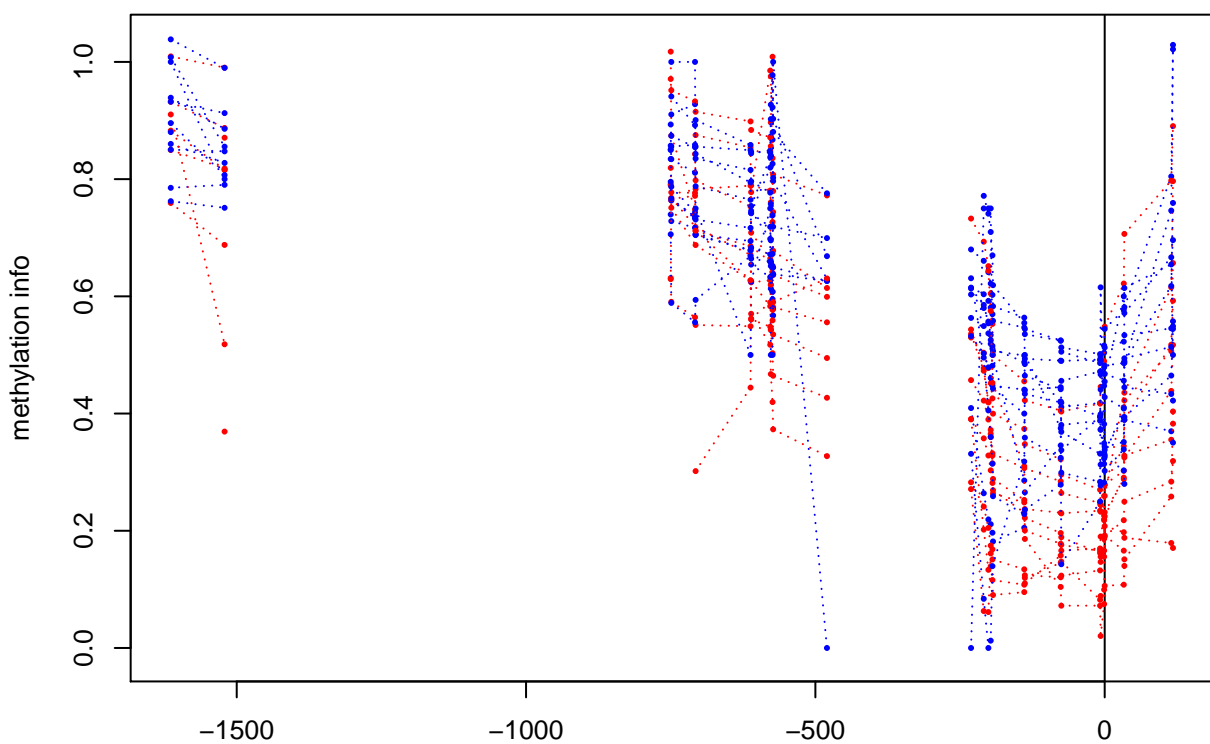

RNAseq logFC(UC-N)= 1.18

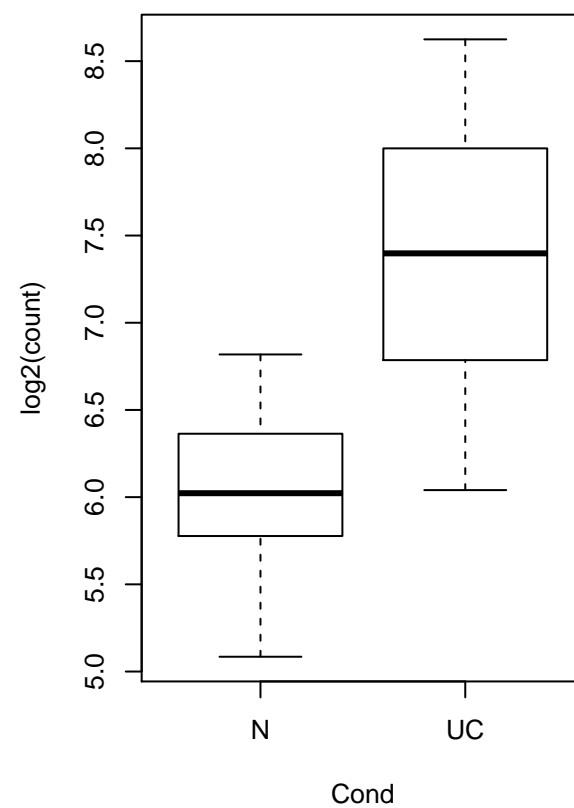

C6orf223 average UC-N %methylation max=7.35% min=-31.91%

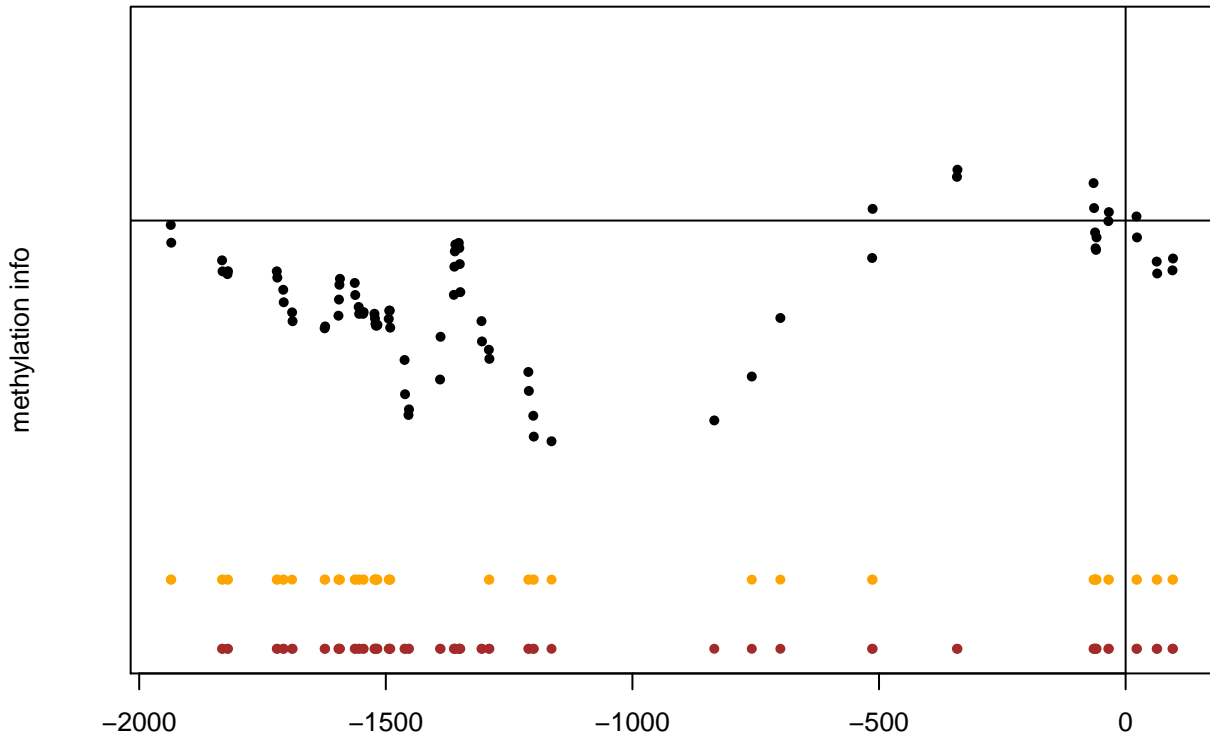

C6orf223 raw %methylation, red=UC, blue=Normal

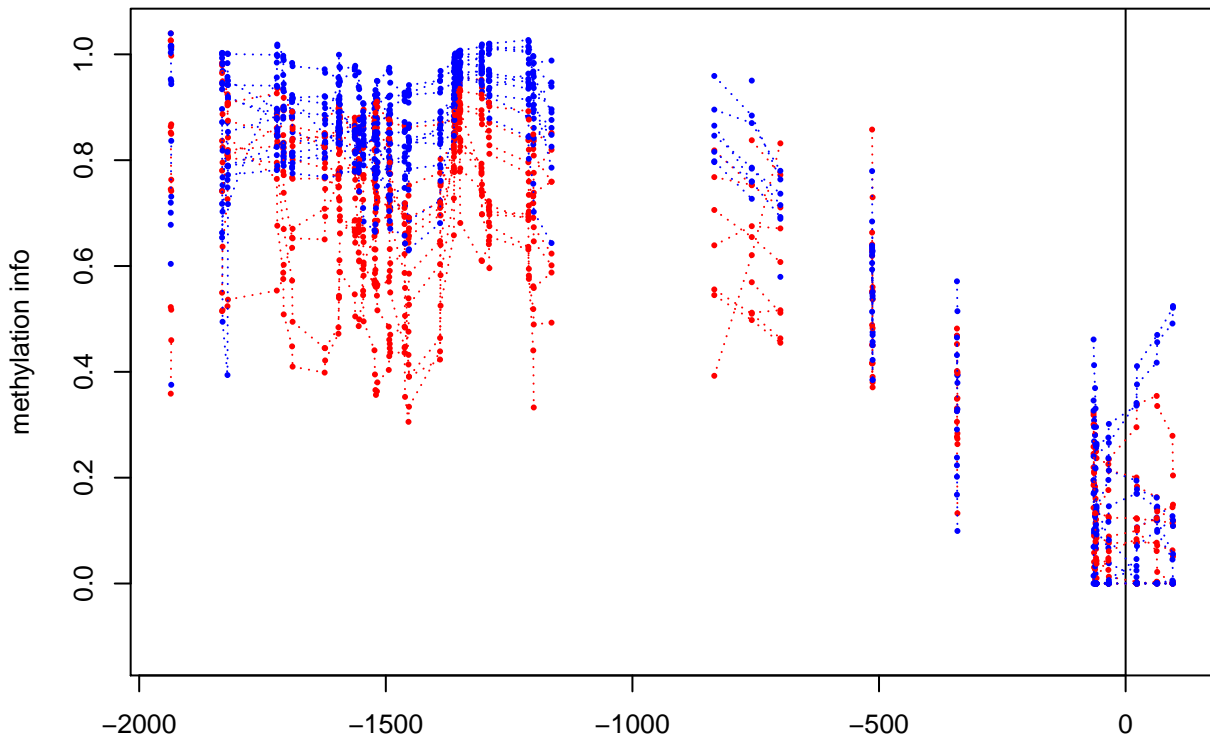

RNAseq logFC(UC-N)= 2.31

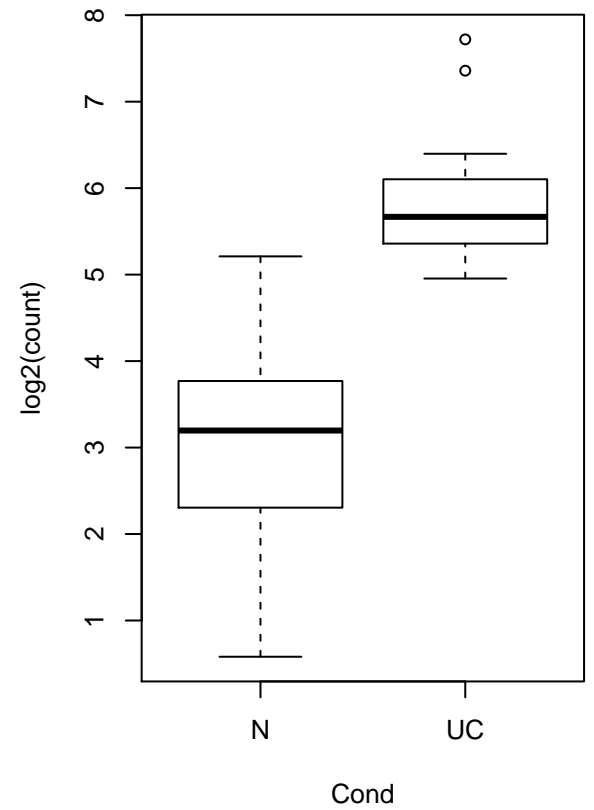



CACNA1E average UC-N %methylation max=-7.13% min=-8.76%

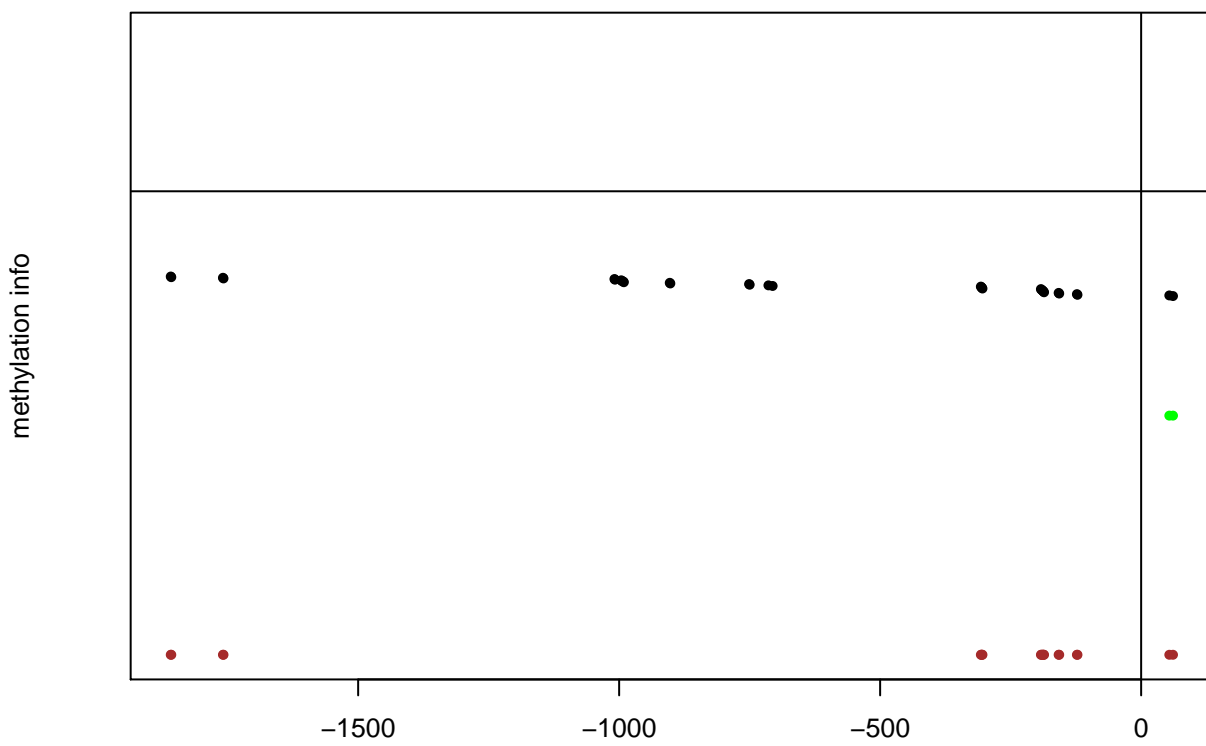

CACNA1E raw %methylation, red=UC, blue=Normal

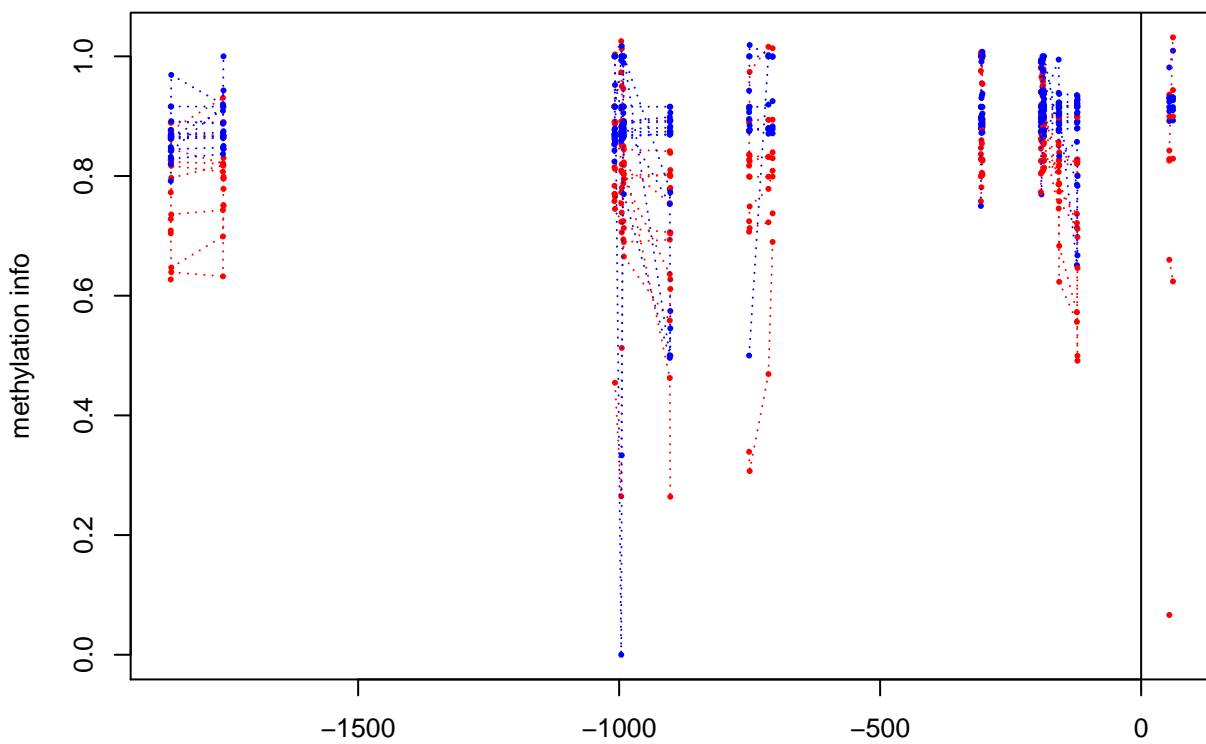

RNAseq logFC(UC-N)= 1.47

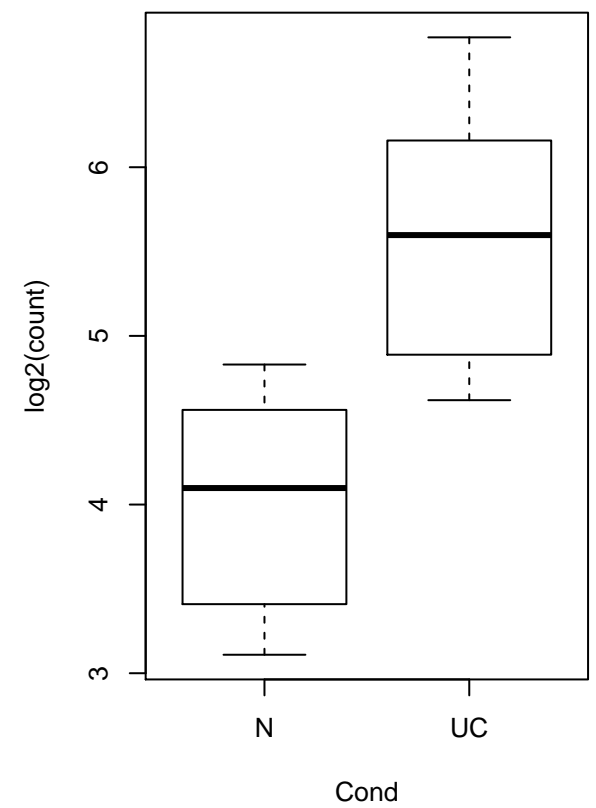

CASS4 average UC-N %methylation max=-7.16% min=-34.16%

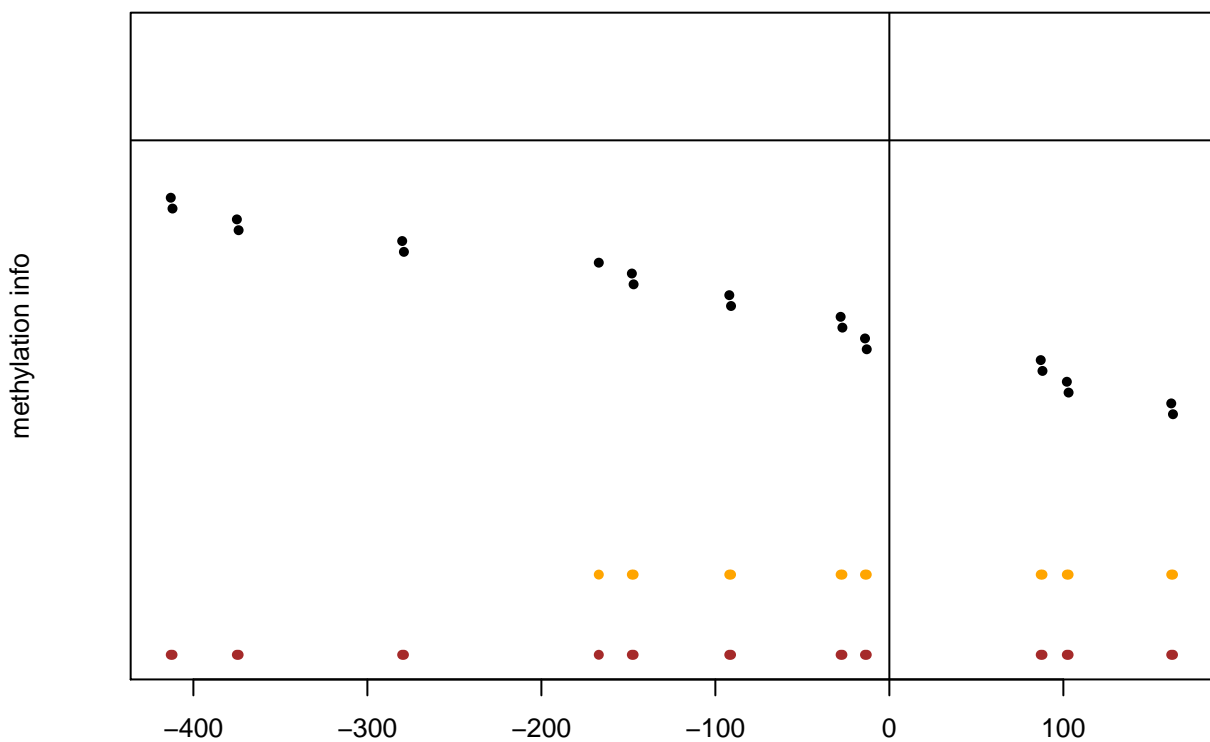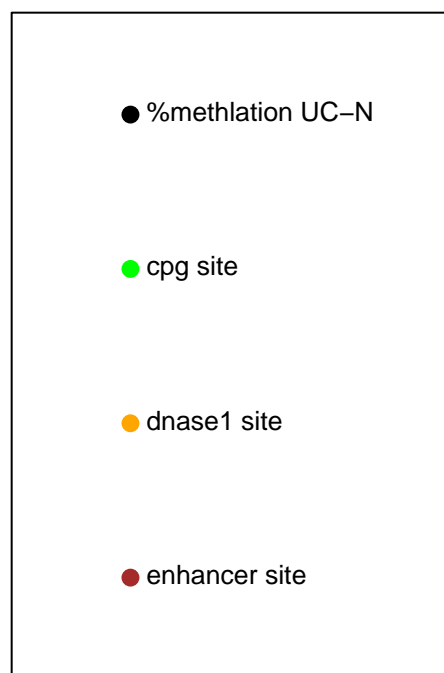

CASS4 raw %methylation, red=UC, blue=Normal

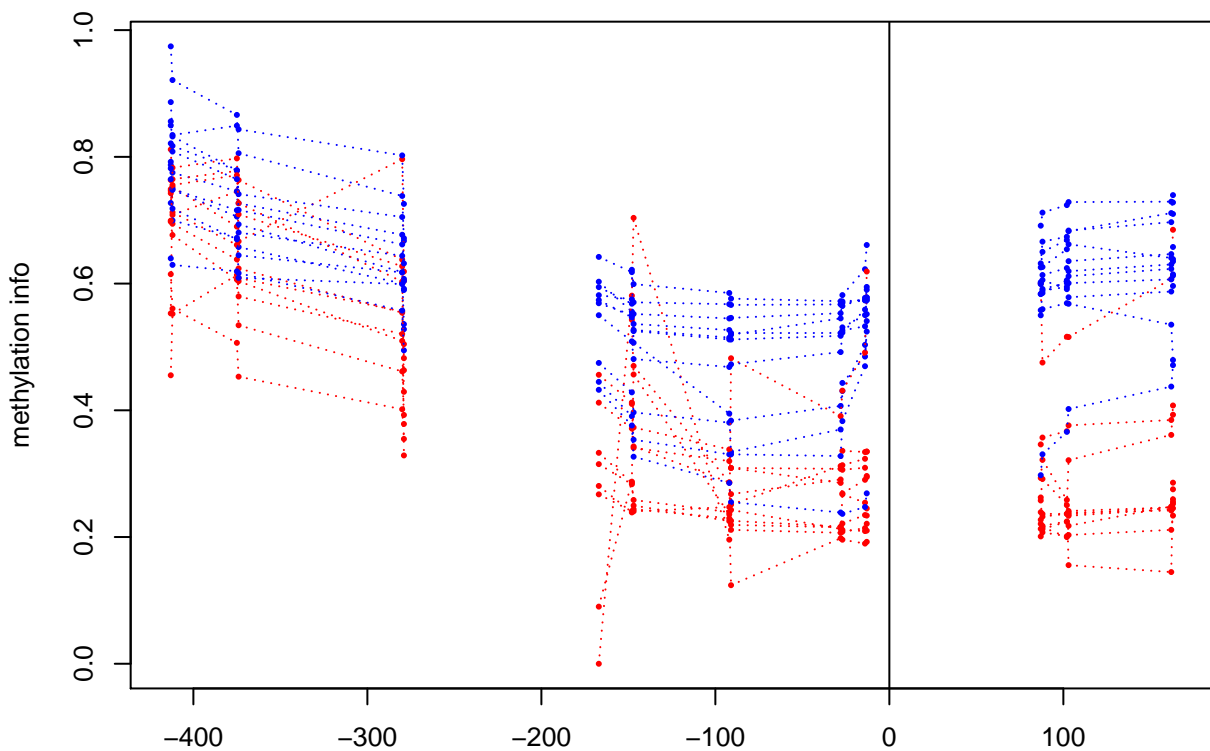

RNAseq logFC(UC-N)= 1.07

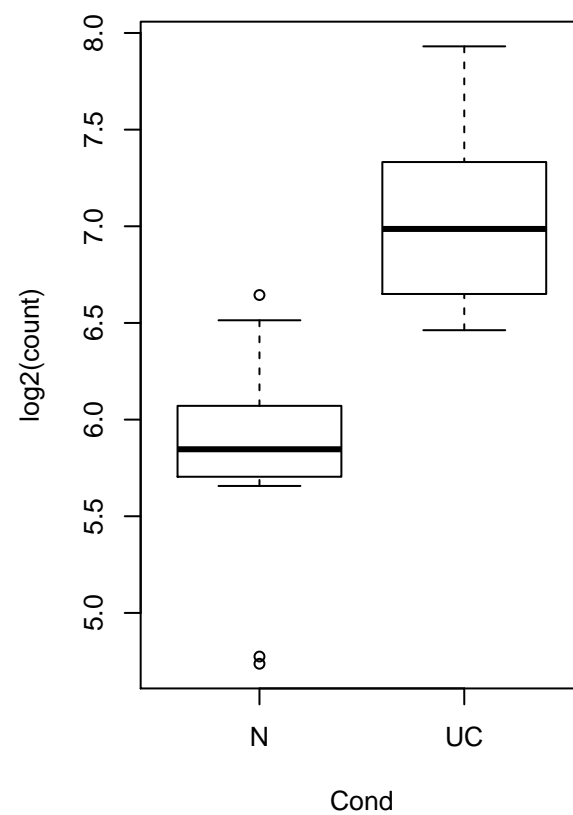

CCDC183 average UC-N %methylation max=21.2% min=2.89%

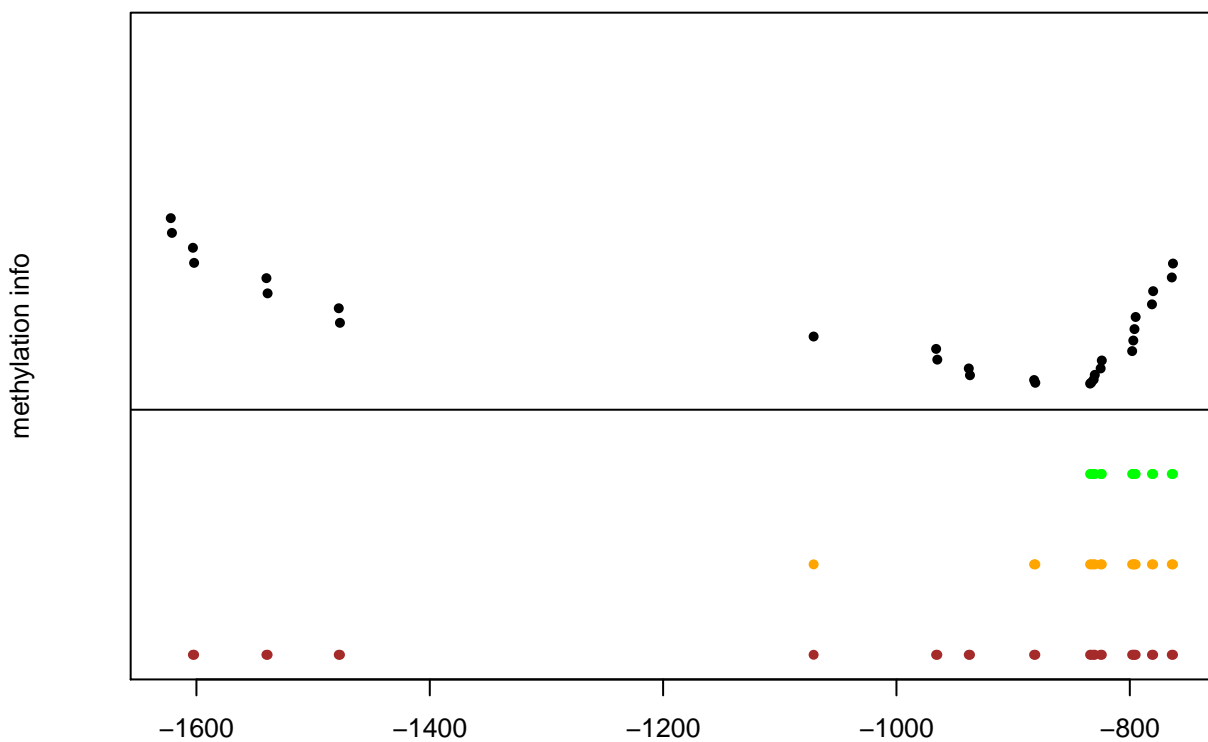

CCDC183 raw %methylation, red=UC, blue=Normal

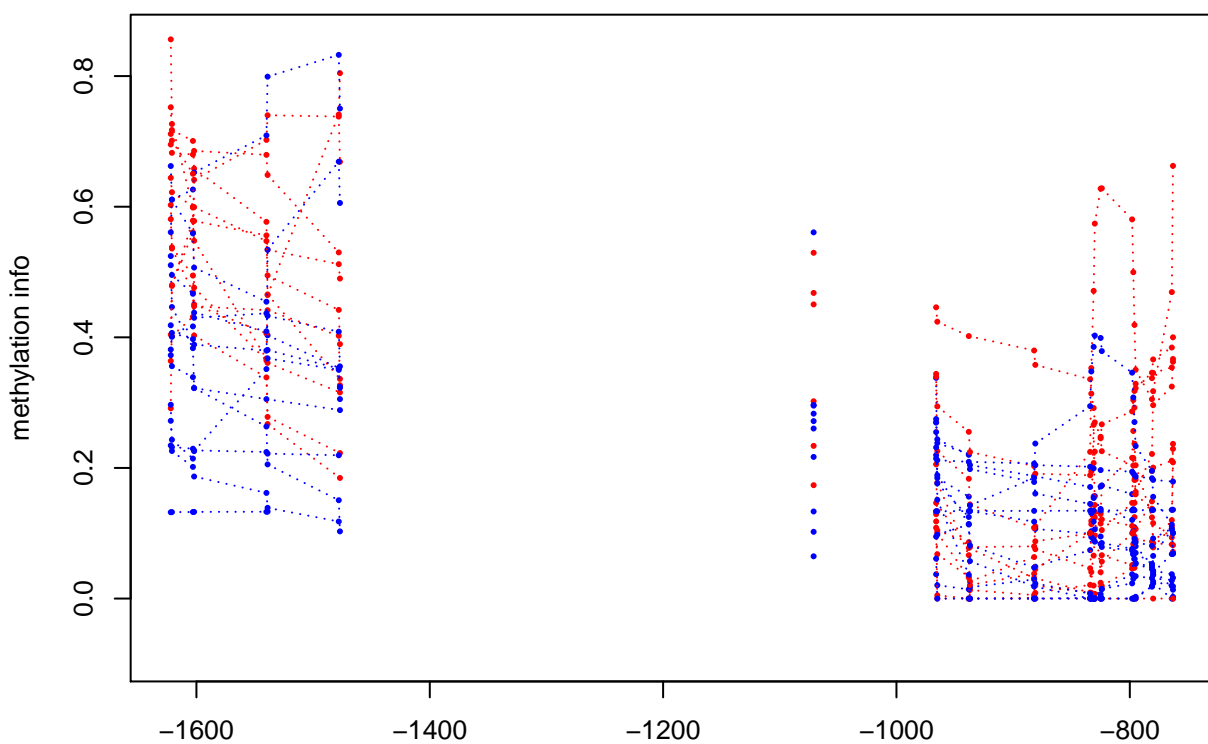

RNAseq logFC(UC-N)= -1.36

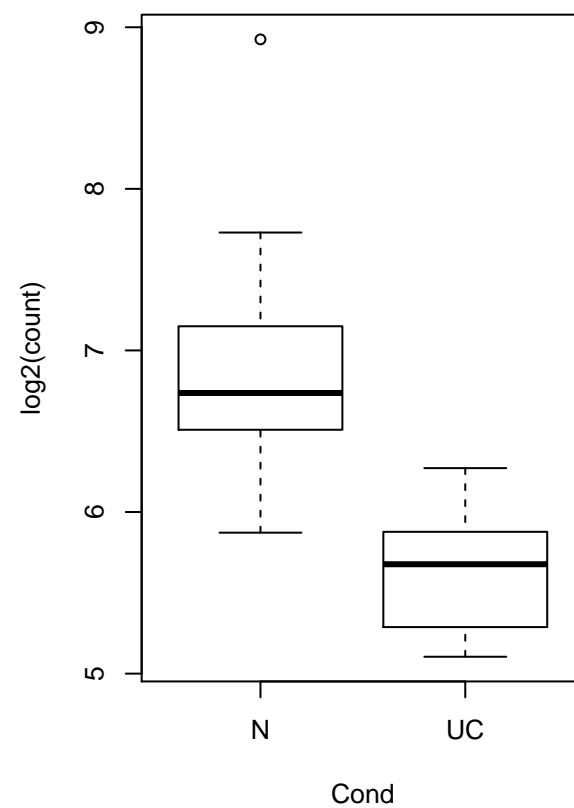

CCDC88B average UC-N %methylation max=-0.4% min=-61.45%

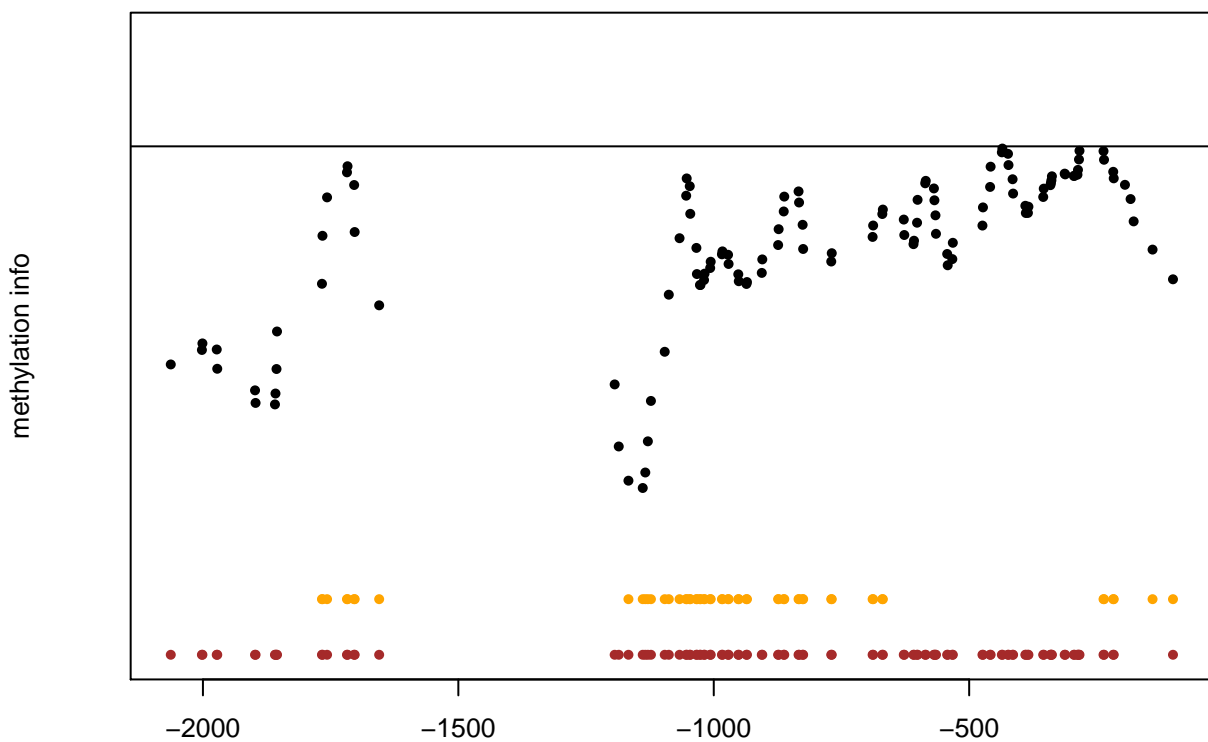

CCDC88B raw %methylation, red=UC, blue=Normal

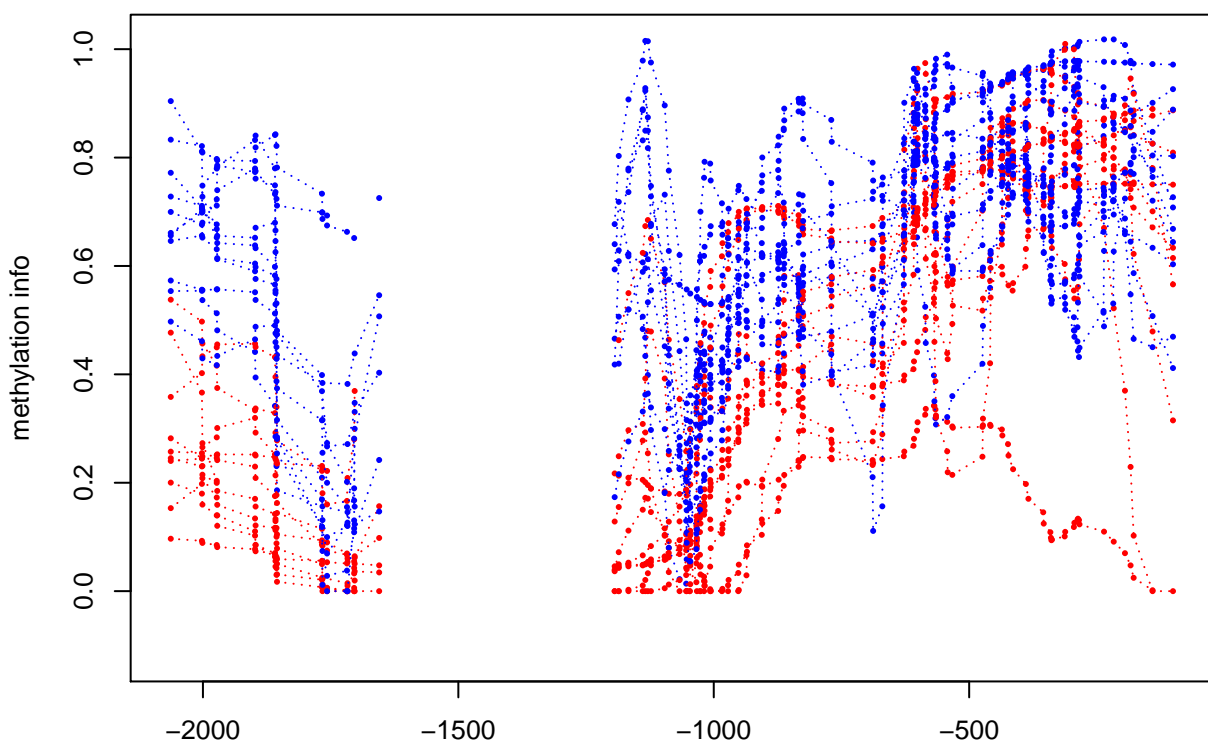

RNAseq logFC(UC-N)= 1.96

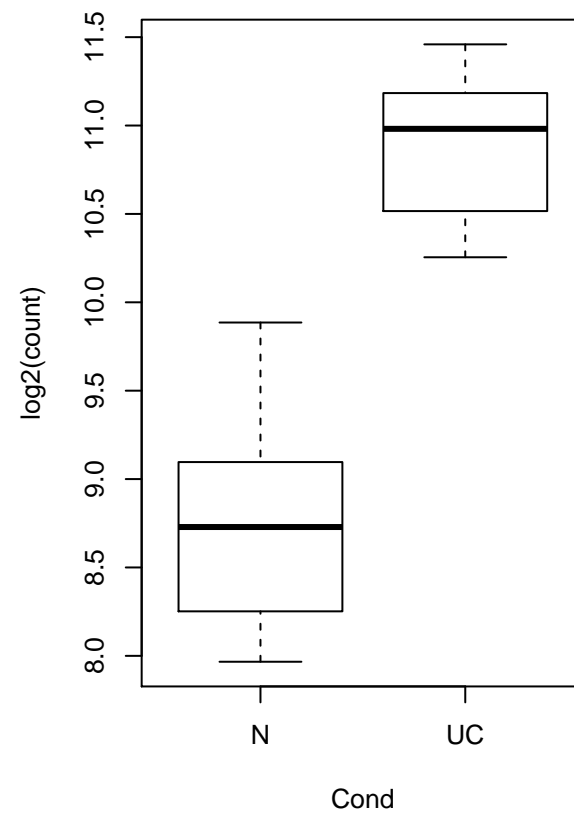

CCL22 average UC-N %methylation max=-16.97% min=-24.13%

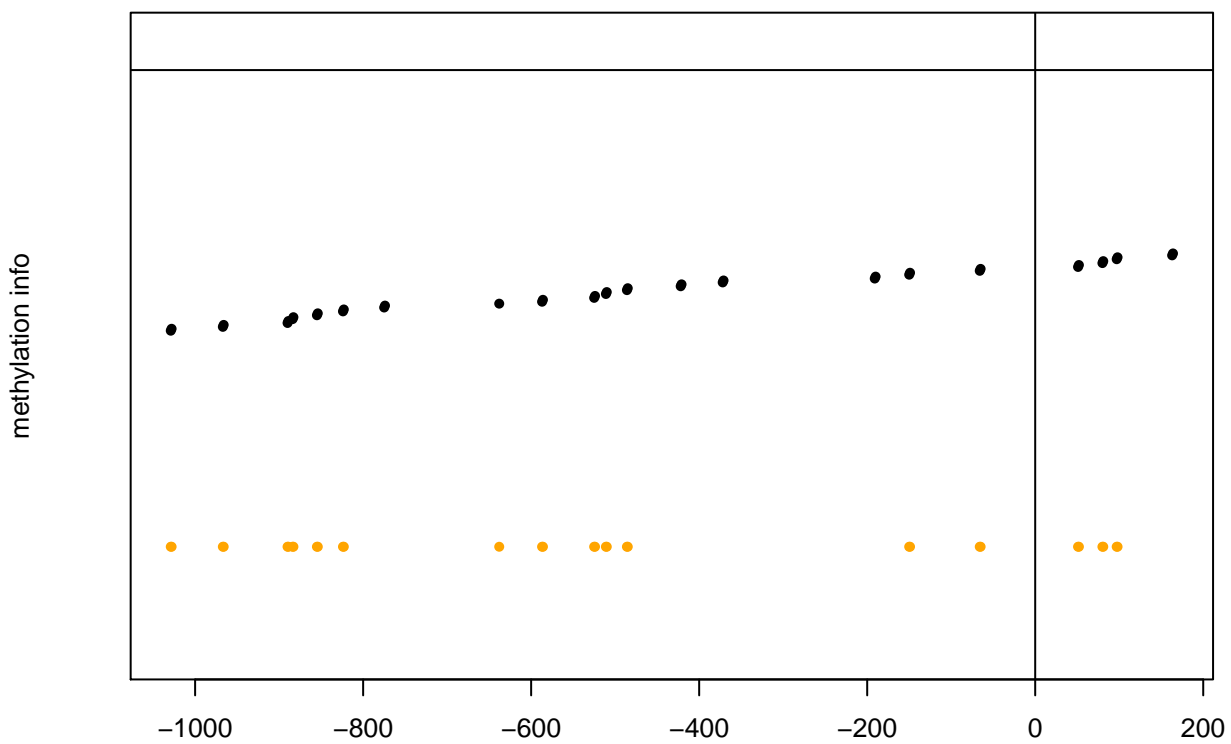

CCL22 raw %methylation, red=UC, blue=Normal

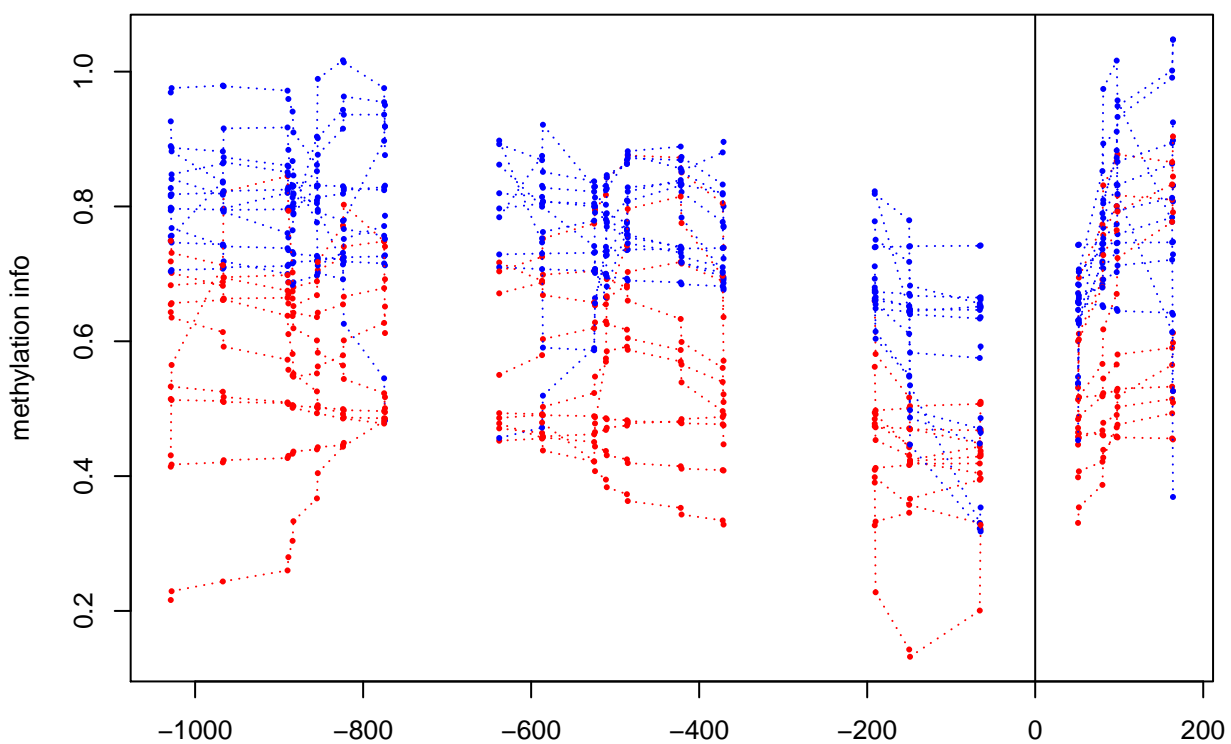

RNAseq logFC(UC-N)= 2.46

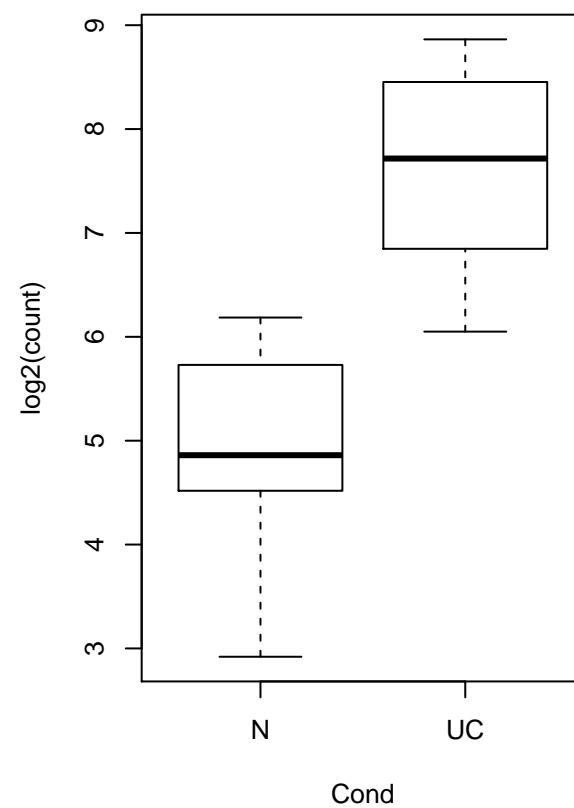

CCR4 average UC-N %methylation max=6.47% min=-32.55%

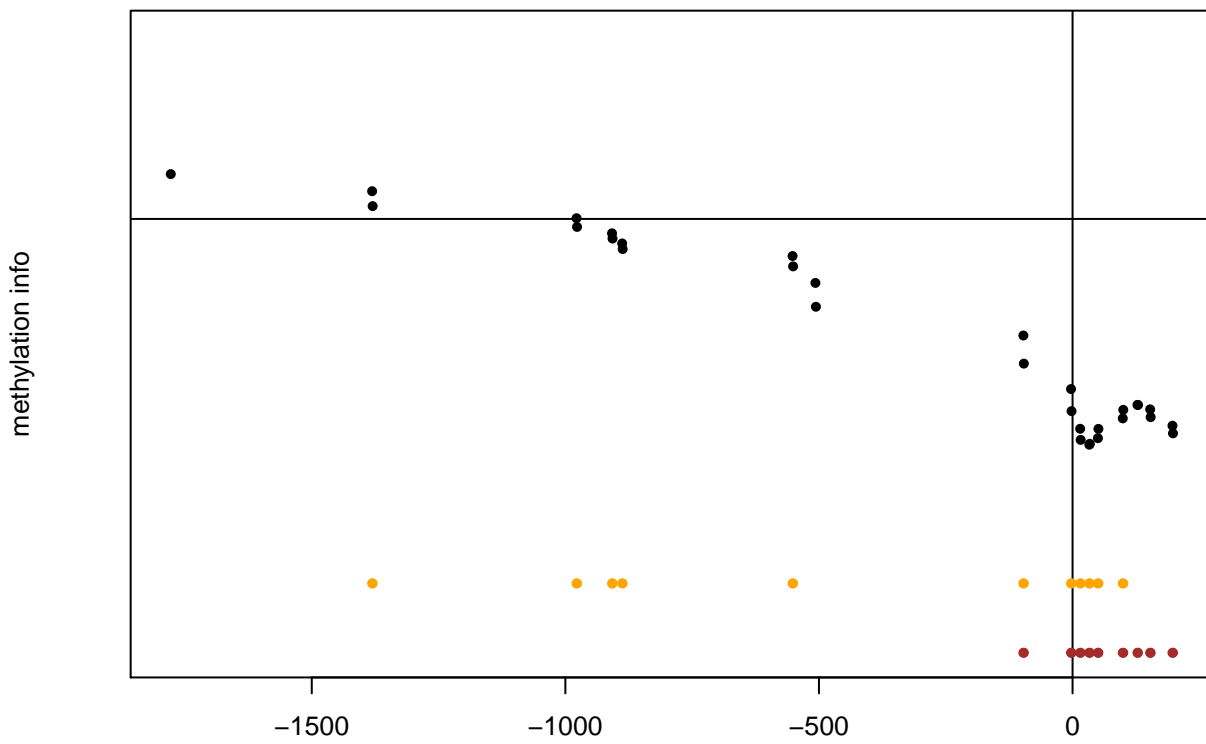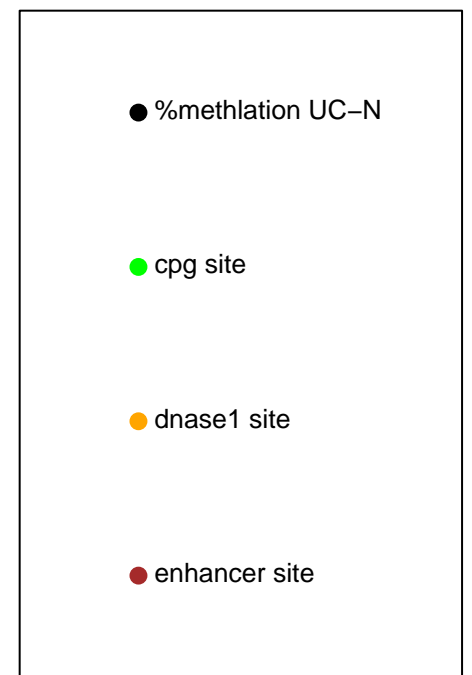

CCR4 raw %methylation, red=UC, blue=Normal

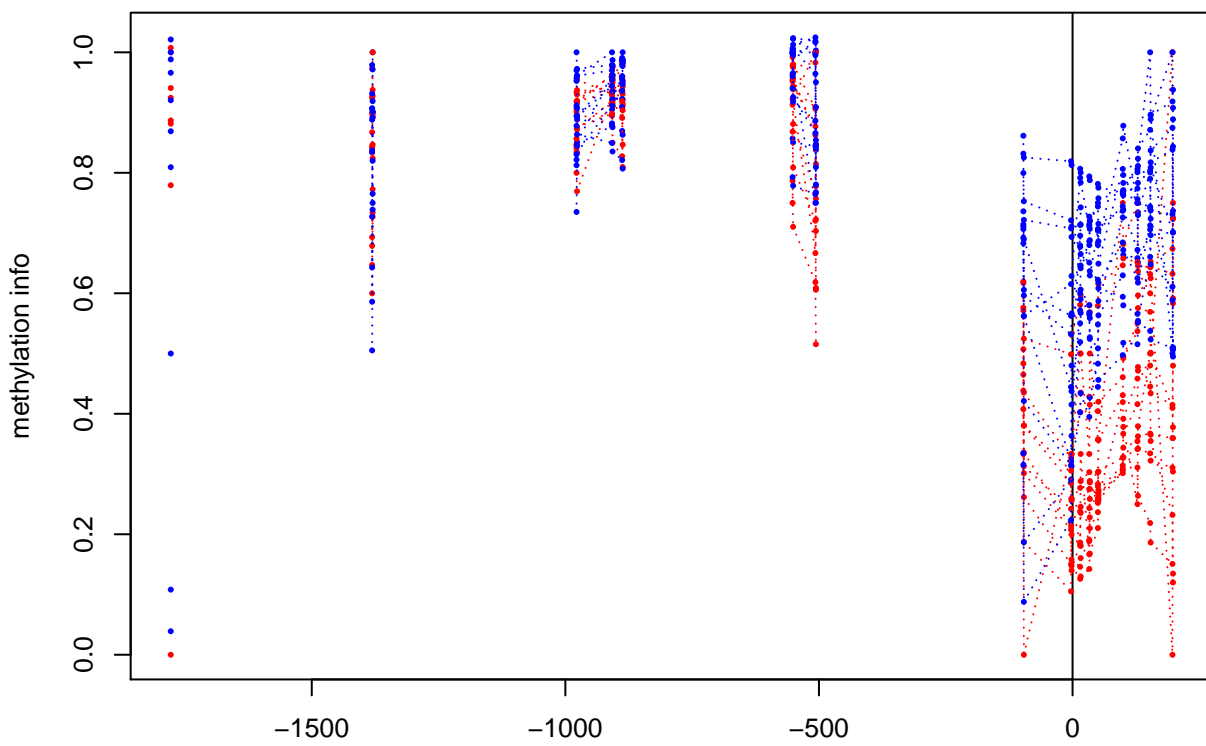

RNAseq logFC(UC-N)= 1.7

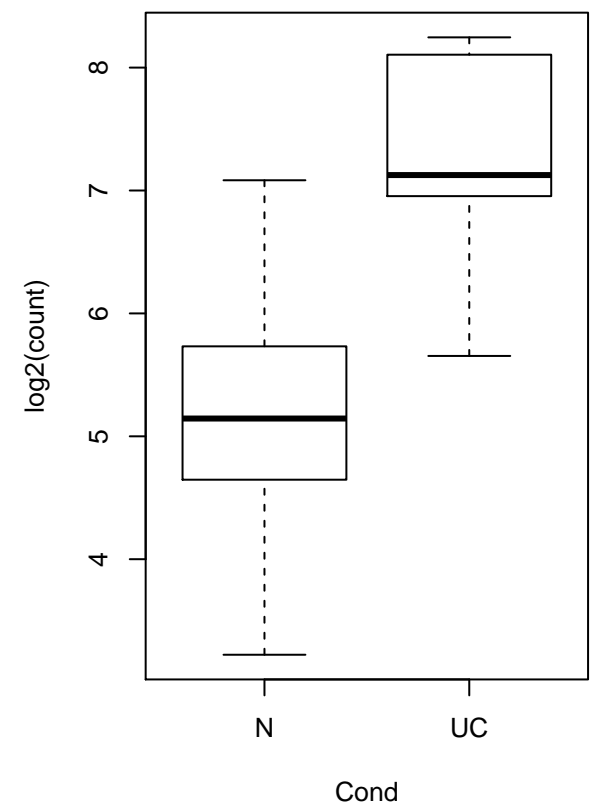

CCR5 average UC-N %methylation max=-16.94% min=-20.51%

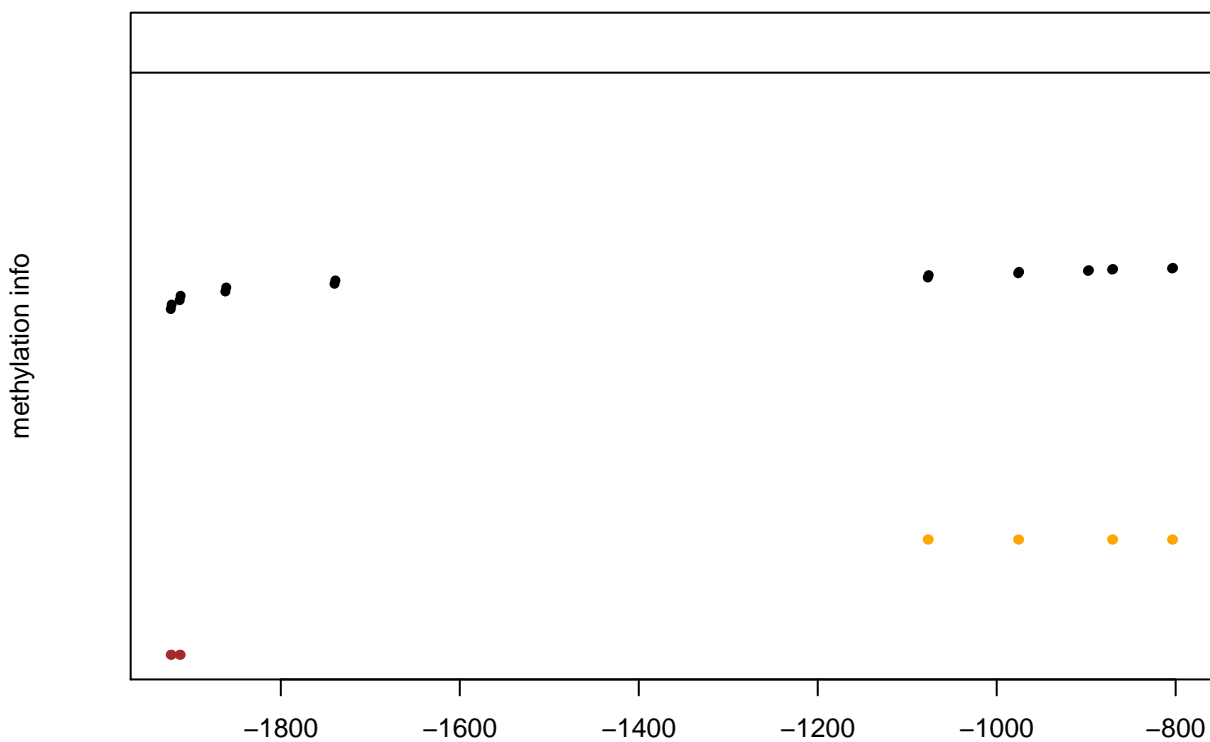

CCR5 raw %methylation, red=UC, blue=Normal

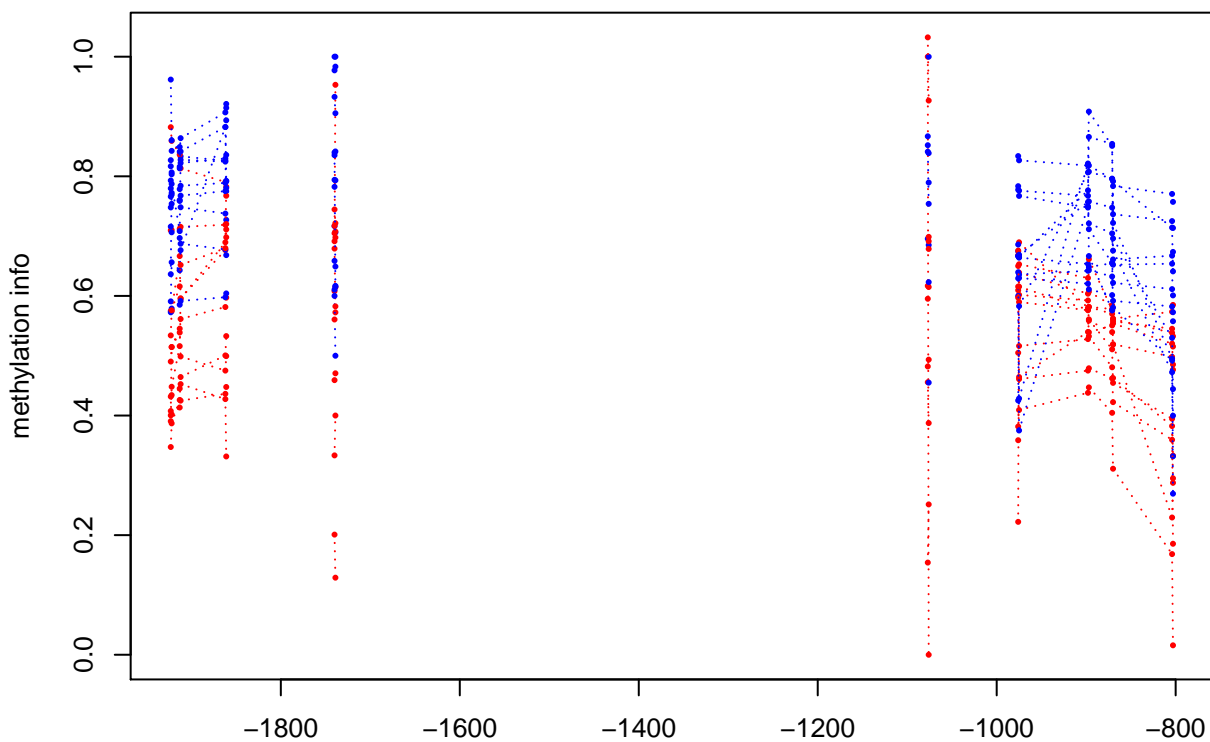

RNAseq logFC(UC-N)= 1.09

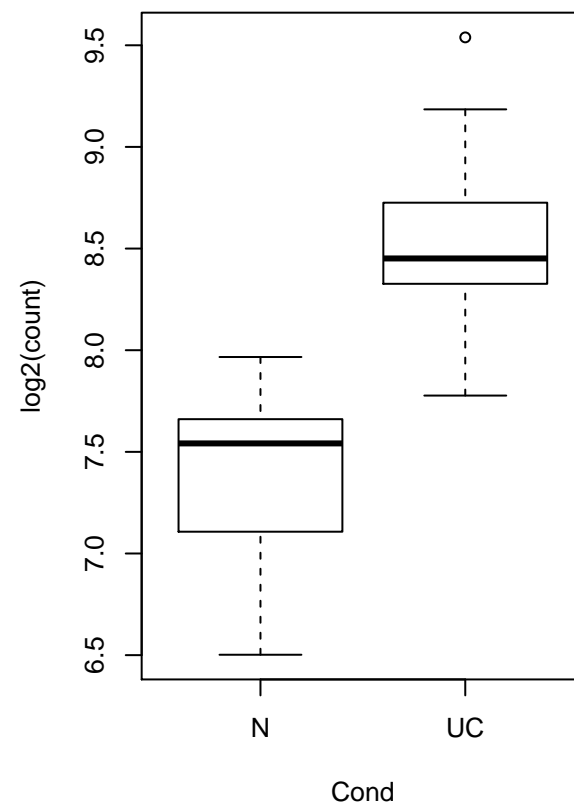

CCR7 average UC-N %methylation max=-22.18% min=-38.87%

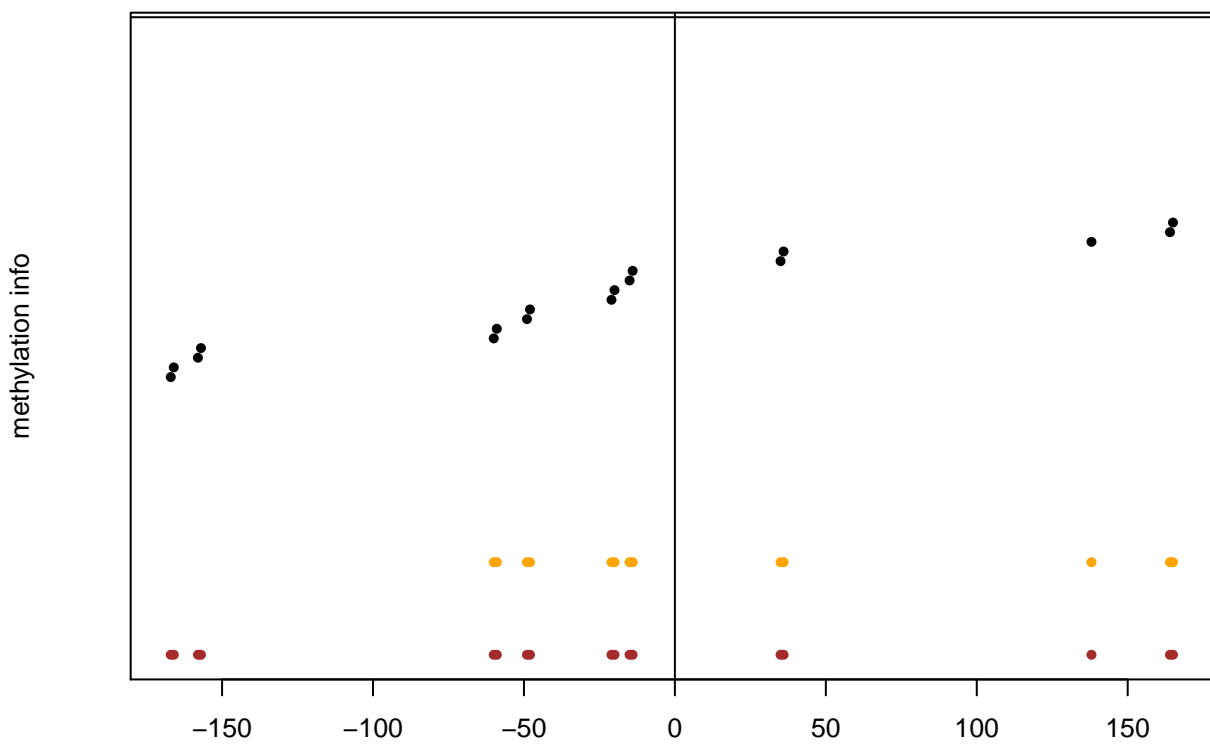

CCR7 raw %methylation, red=UC, blue=Normal

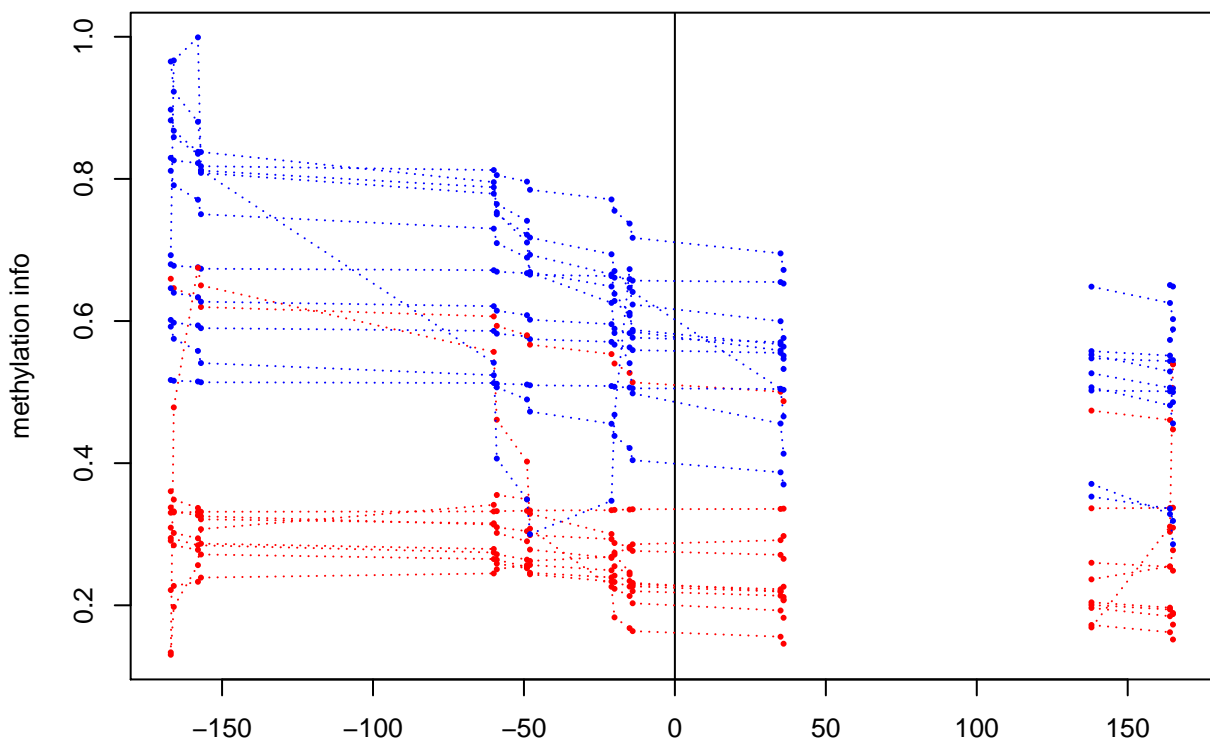

RNAseq logFC(UC-N)= 1.96

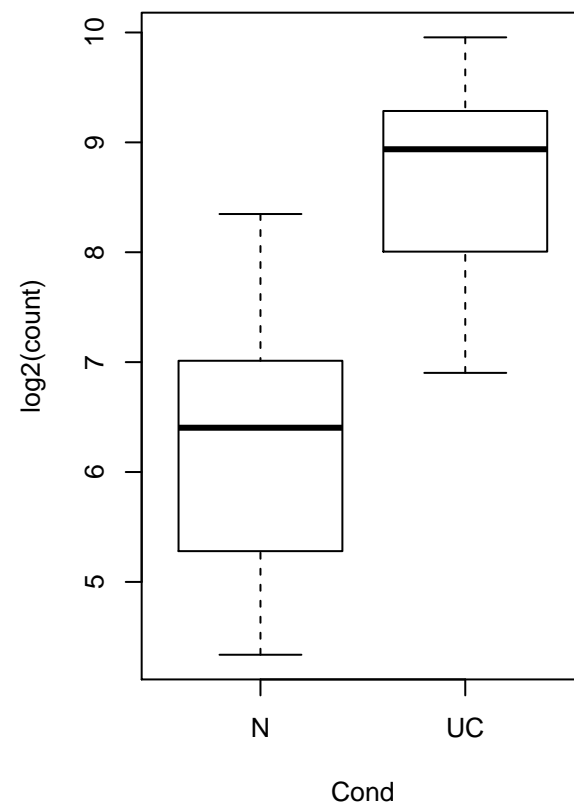



CD180 average UC-N %methylation max=-5.43% min=-21.14%

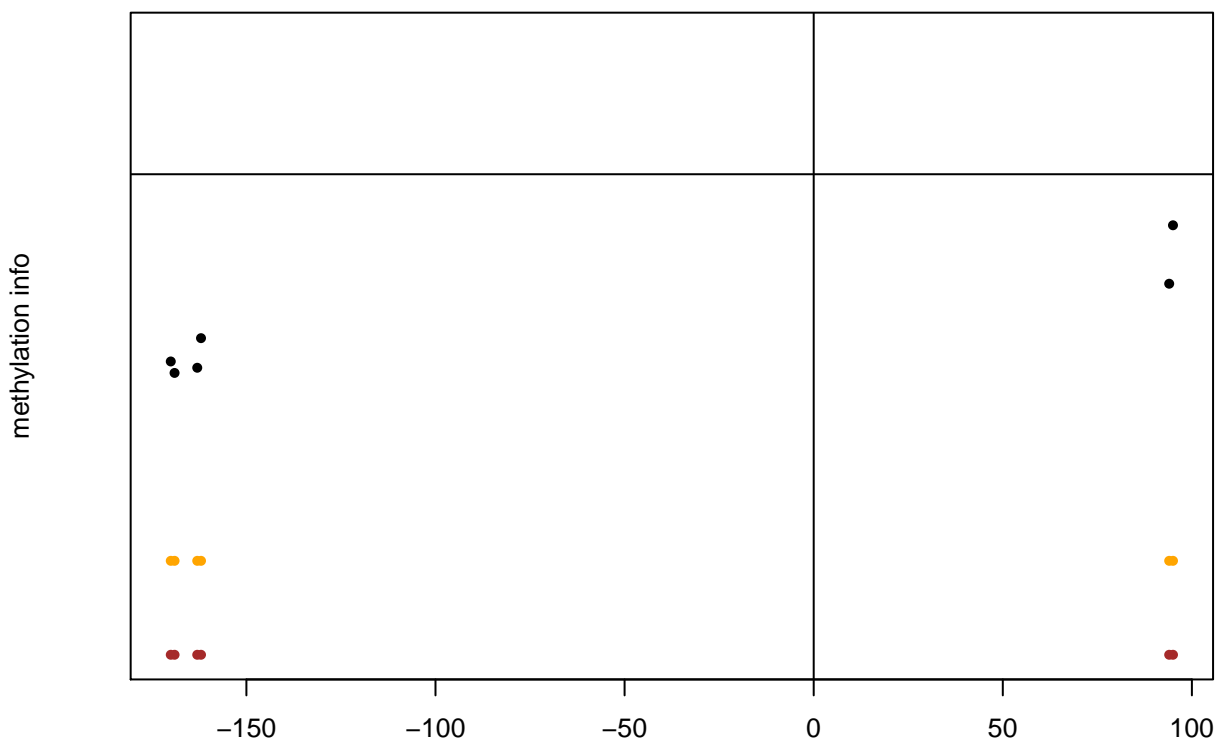

CD180 raw %methylation, red=UC, blue=Normal

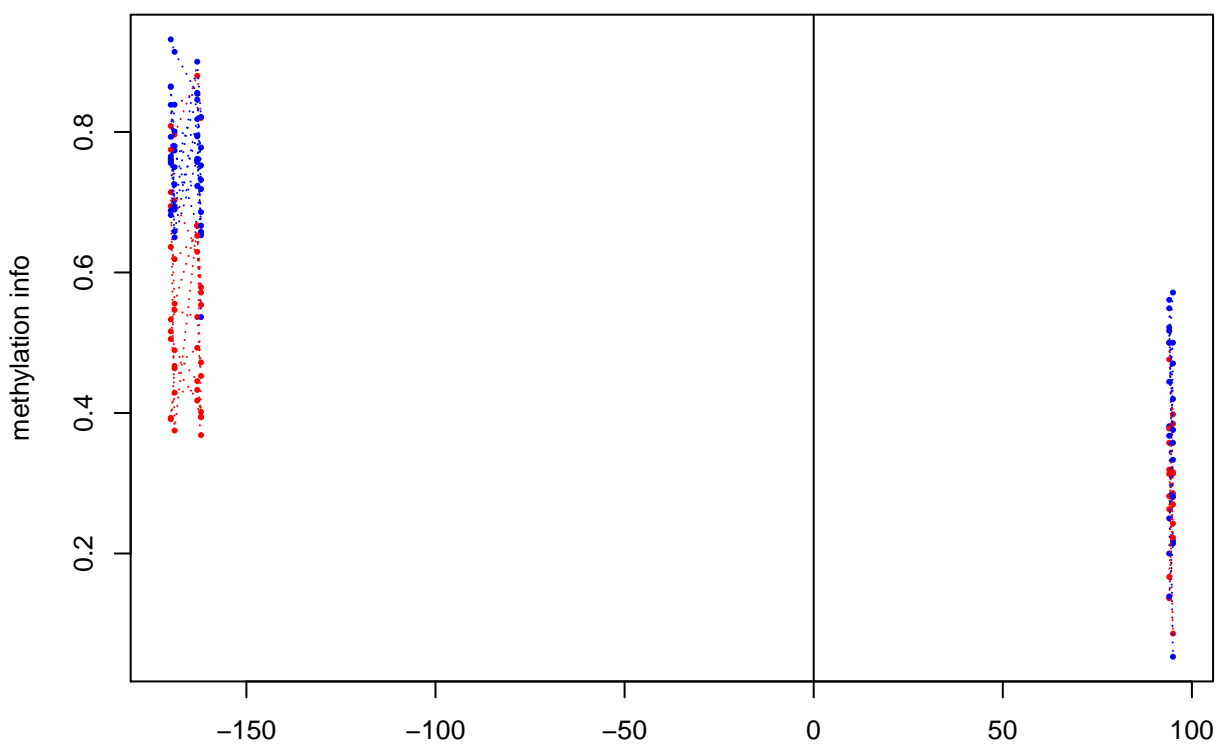

RNAseq logFC(UC-N)= 1.22

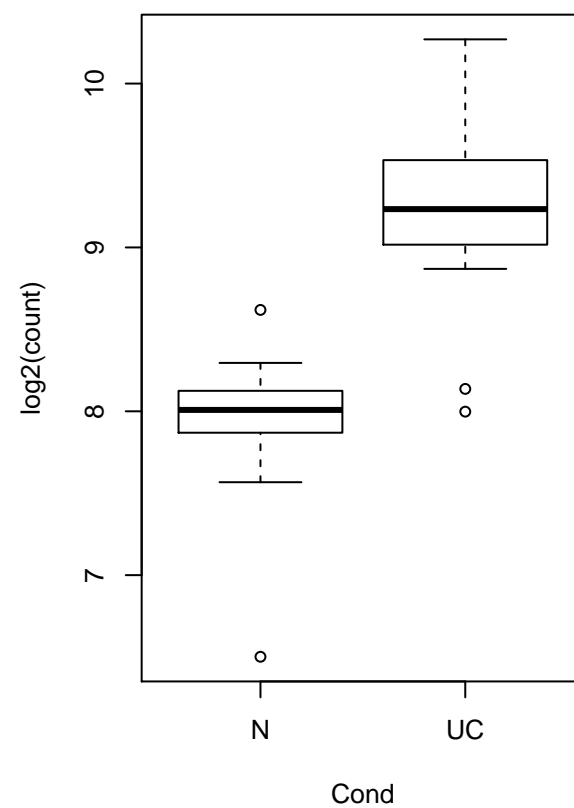

CD19 average UC-N %methylation max=-10.63% min=-39.48%

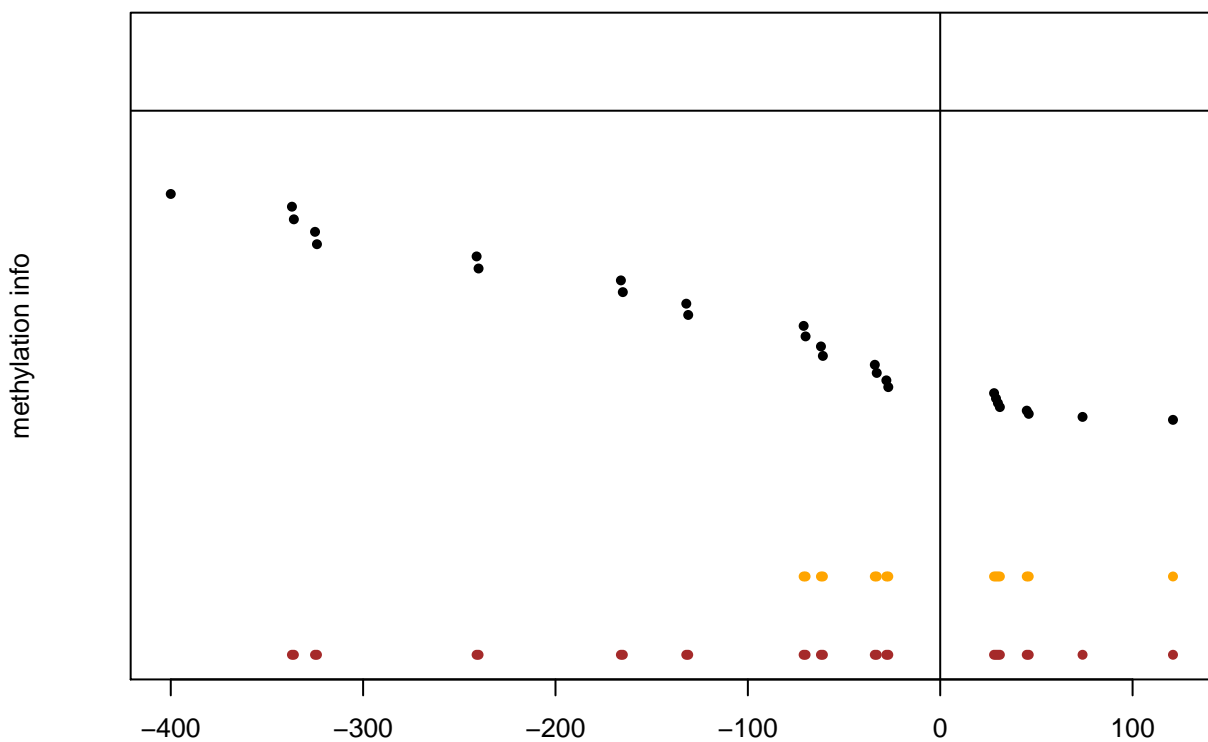

CD19 raw %methylation, red=UC, blue=Normal

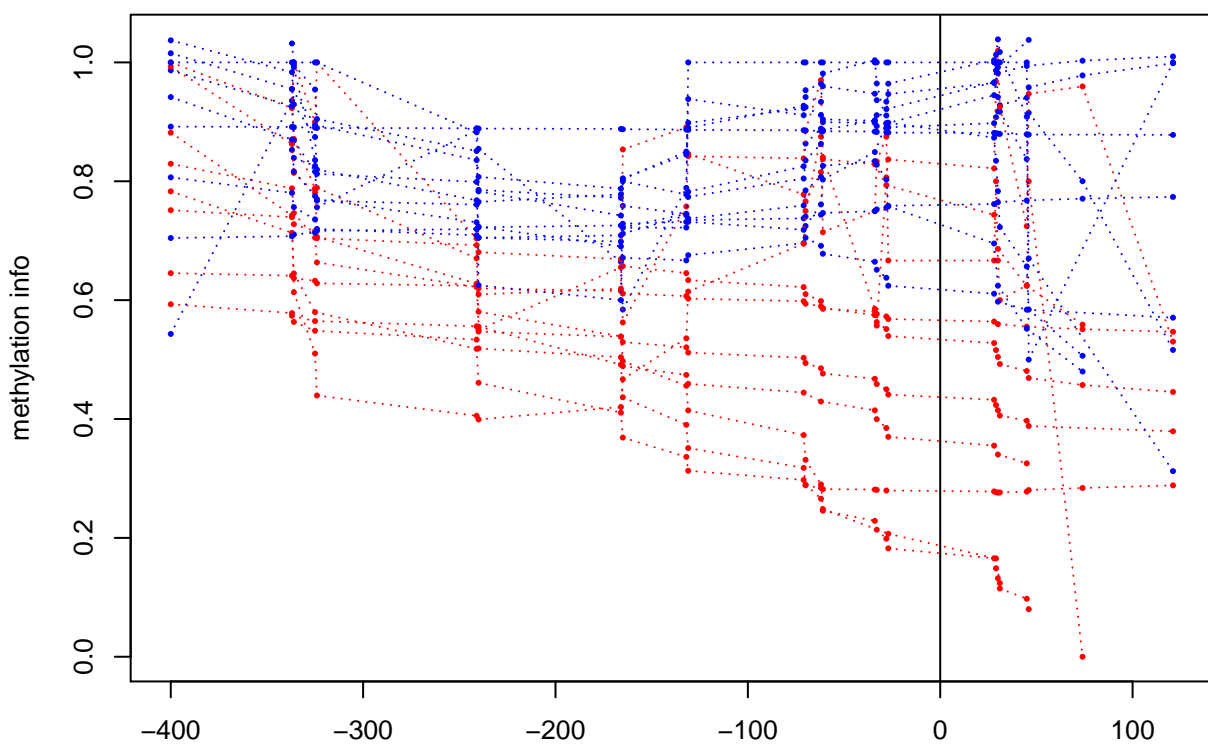

RNAseq logFC(UC-N)= 2.52

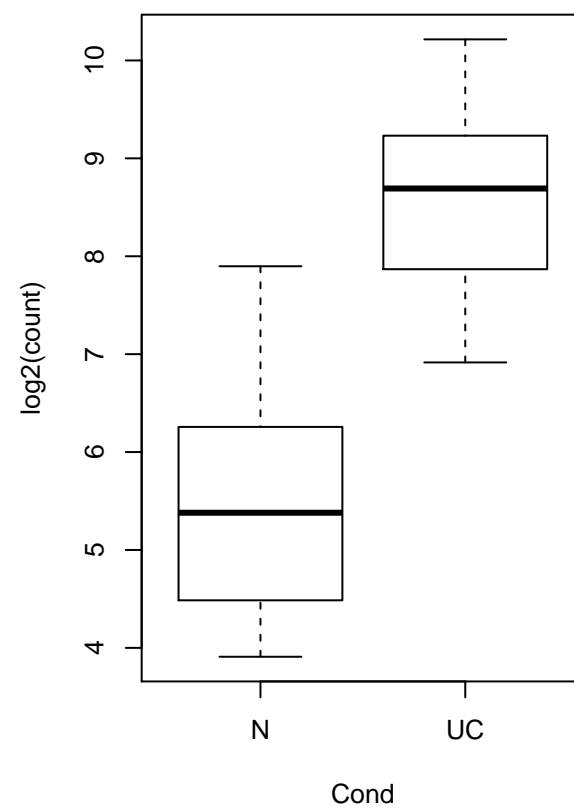

CD247 average UC-N %methylation max=-6.76% min=-30.23%

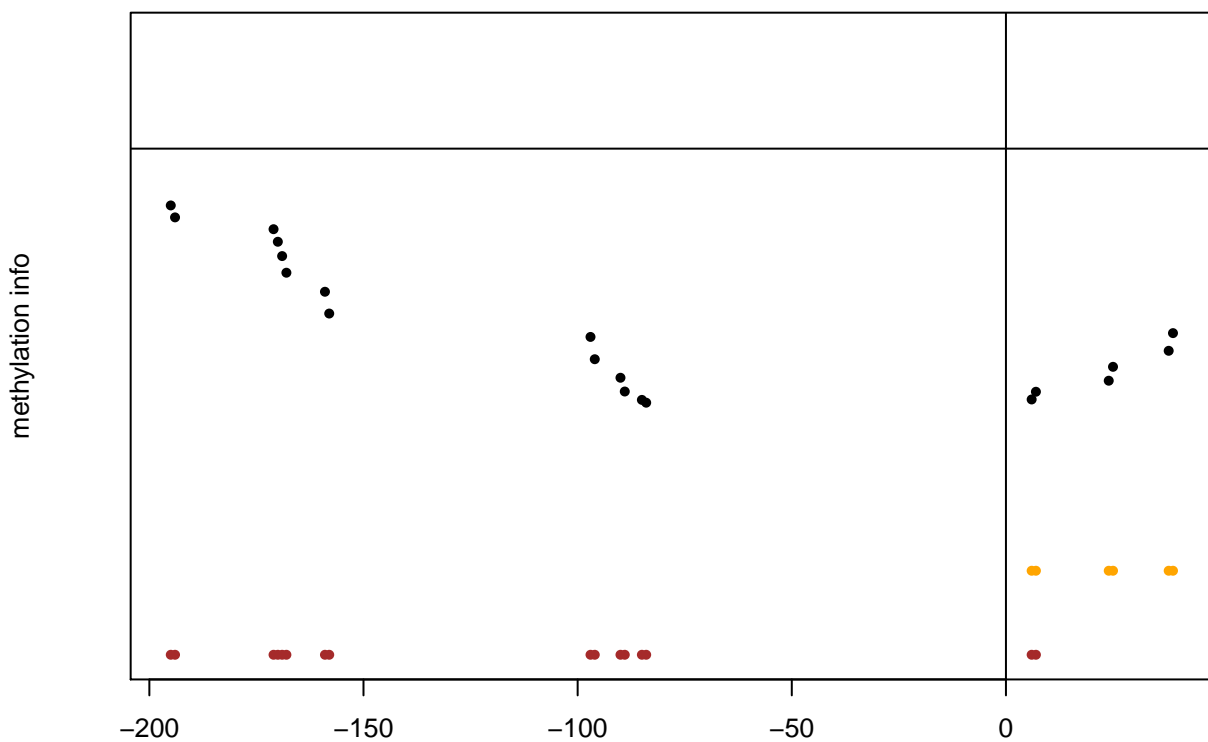

CD247 raw %methylation, red=UC, blue=Normal

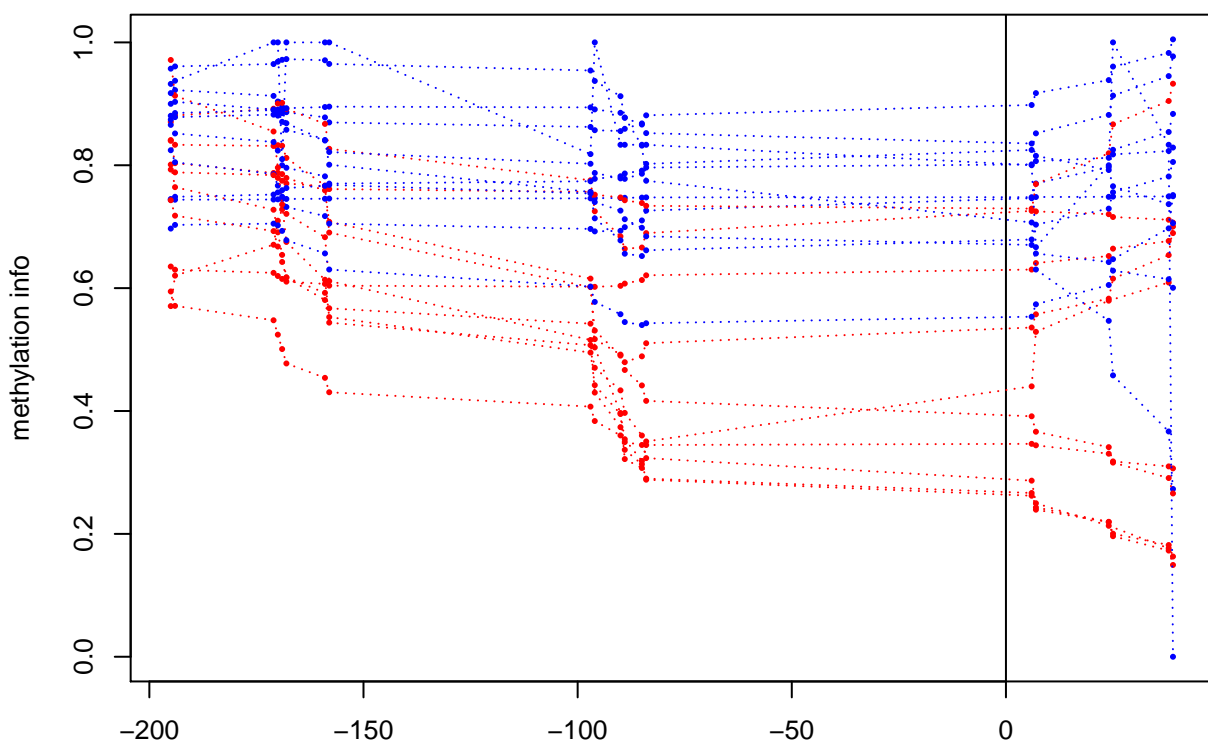

RNAseq logFC(UC-N)= 1.22

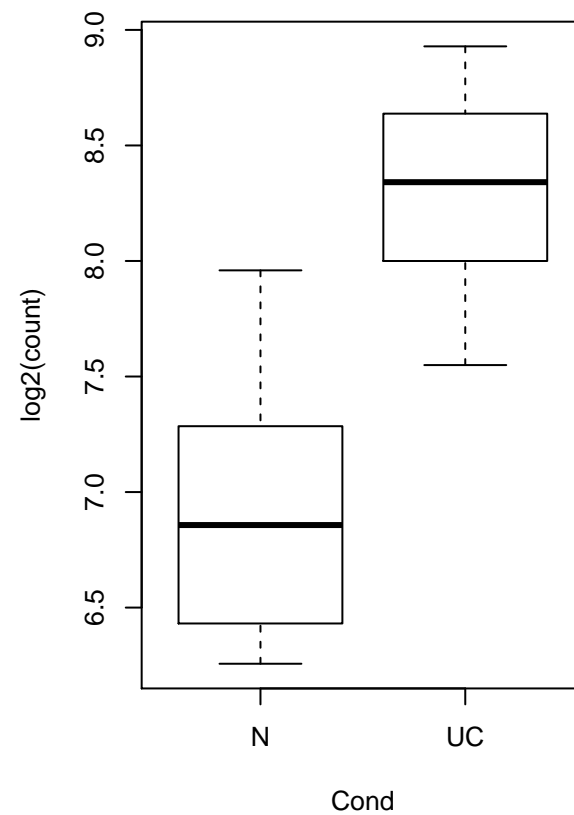

CD28 average UC-N %methylation max=0.07% min=-35.12%

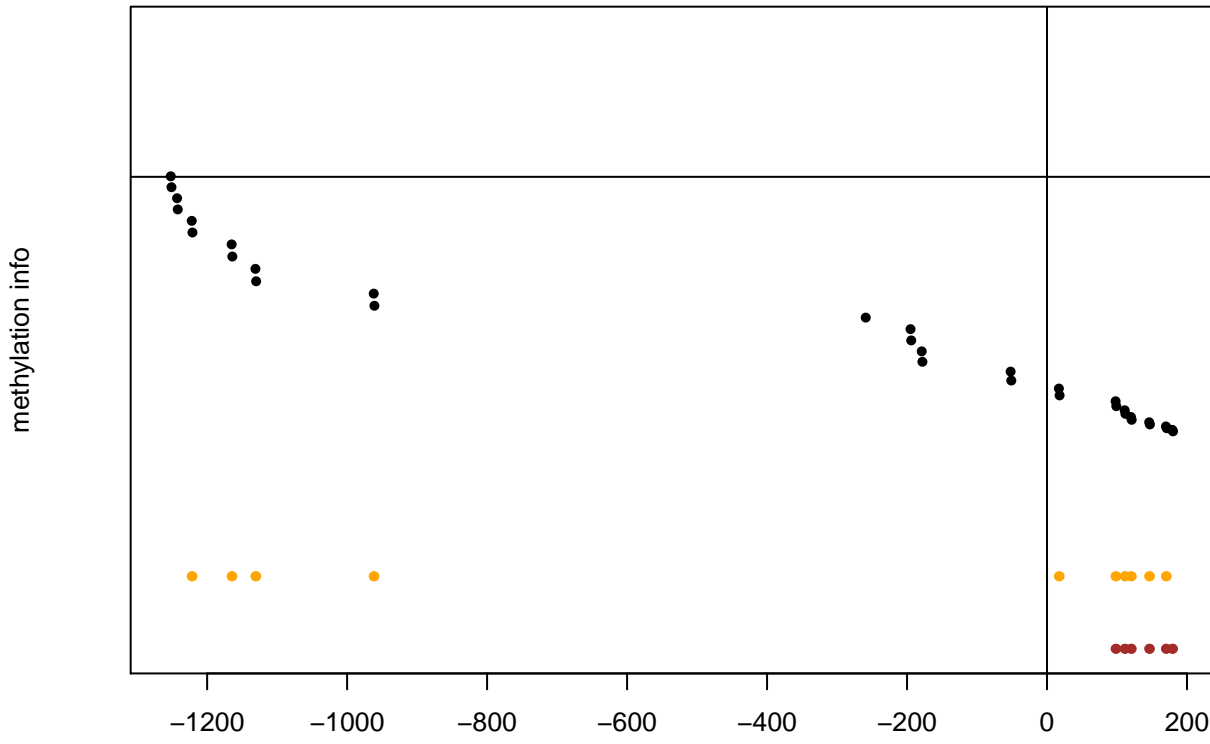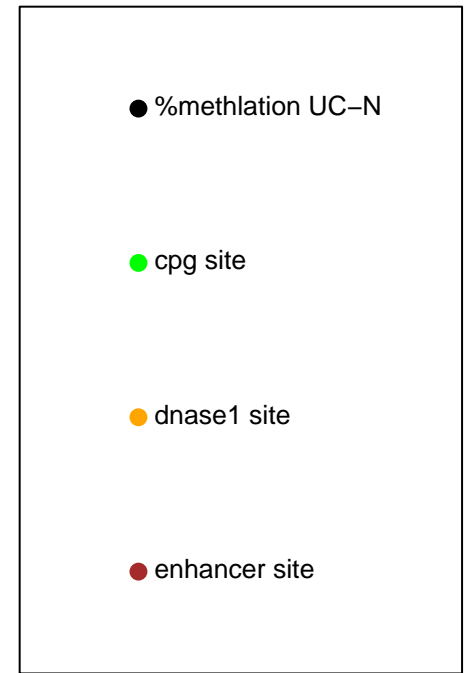

CD28 raw %methylation, red=UC, blue=Normal

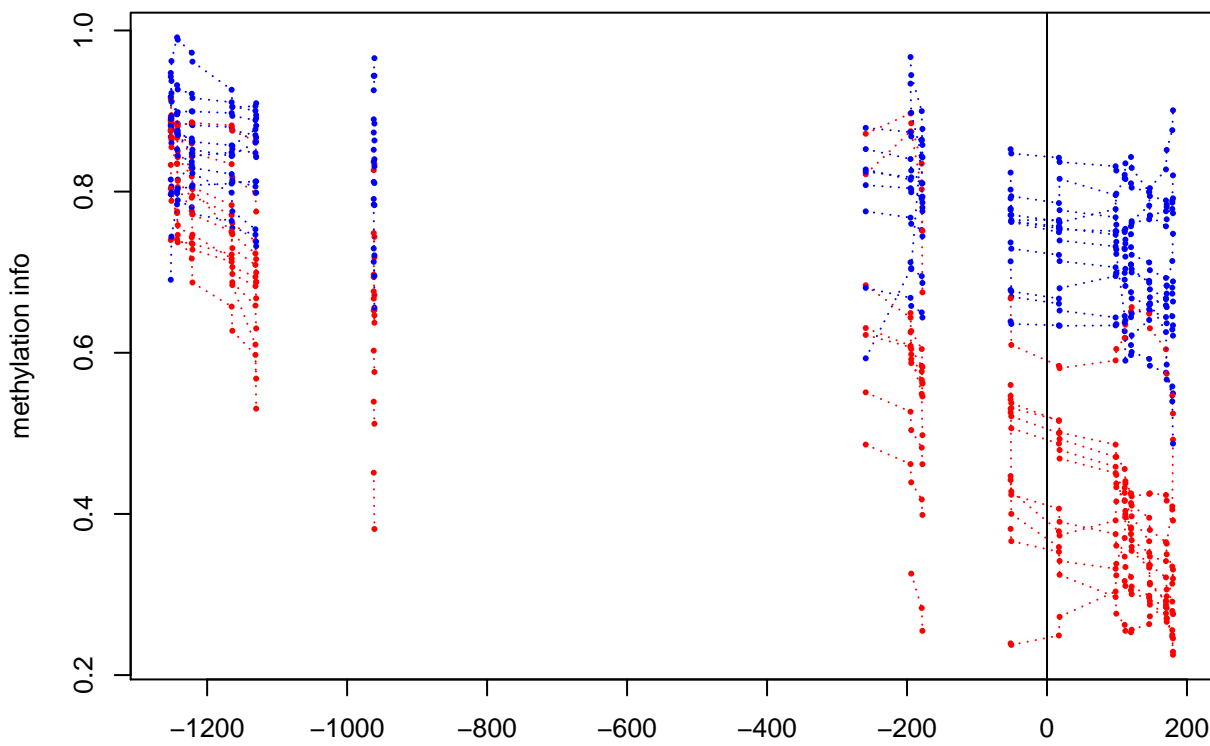

RNAseq logFC(UC-N)= 1.35

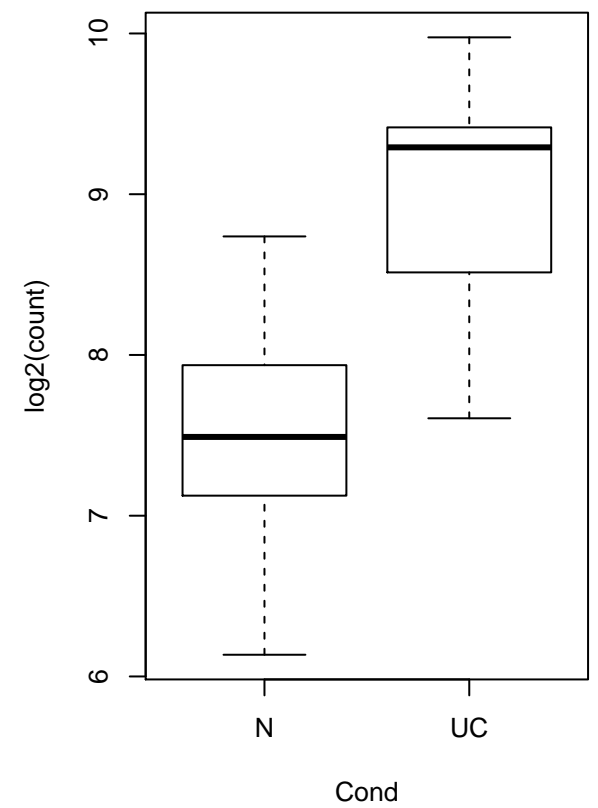

CD2 average UC-N %methylation max=1.93% min=-17.53%

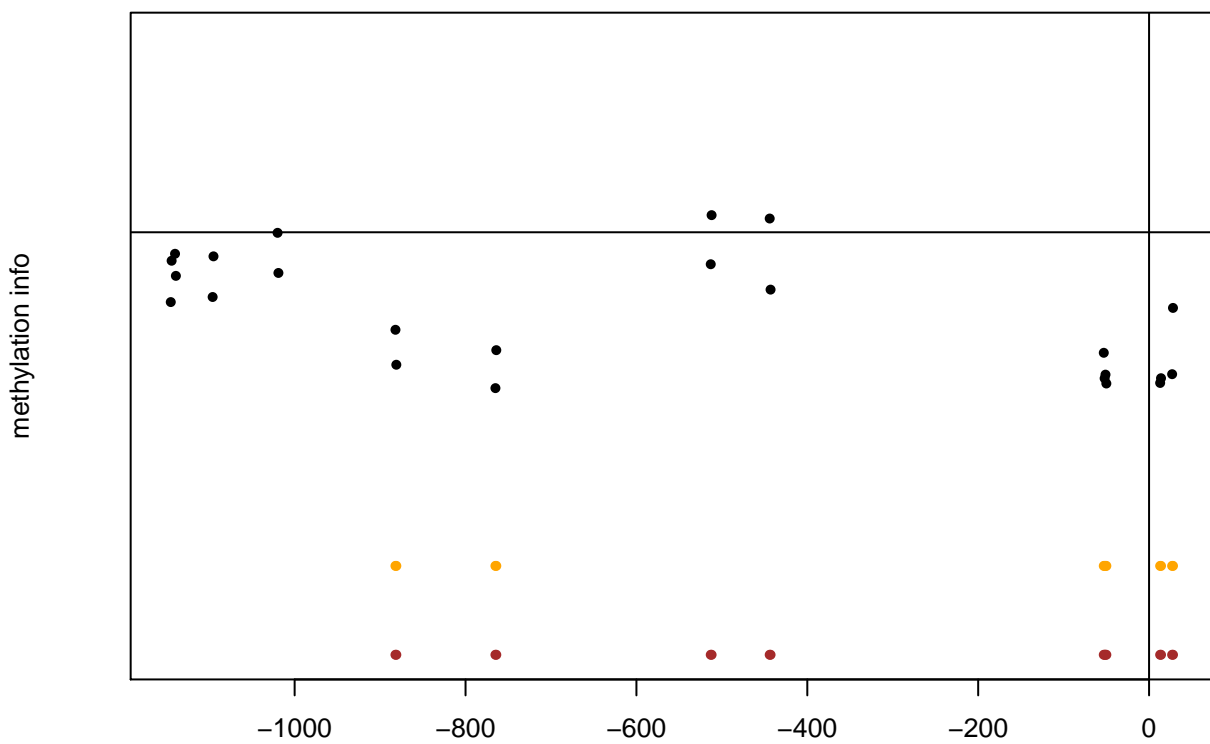

CD2 raw %methylation, red=UC, blue=Normal

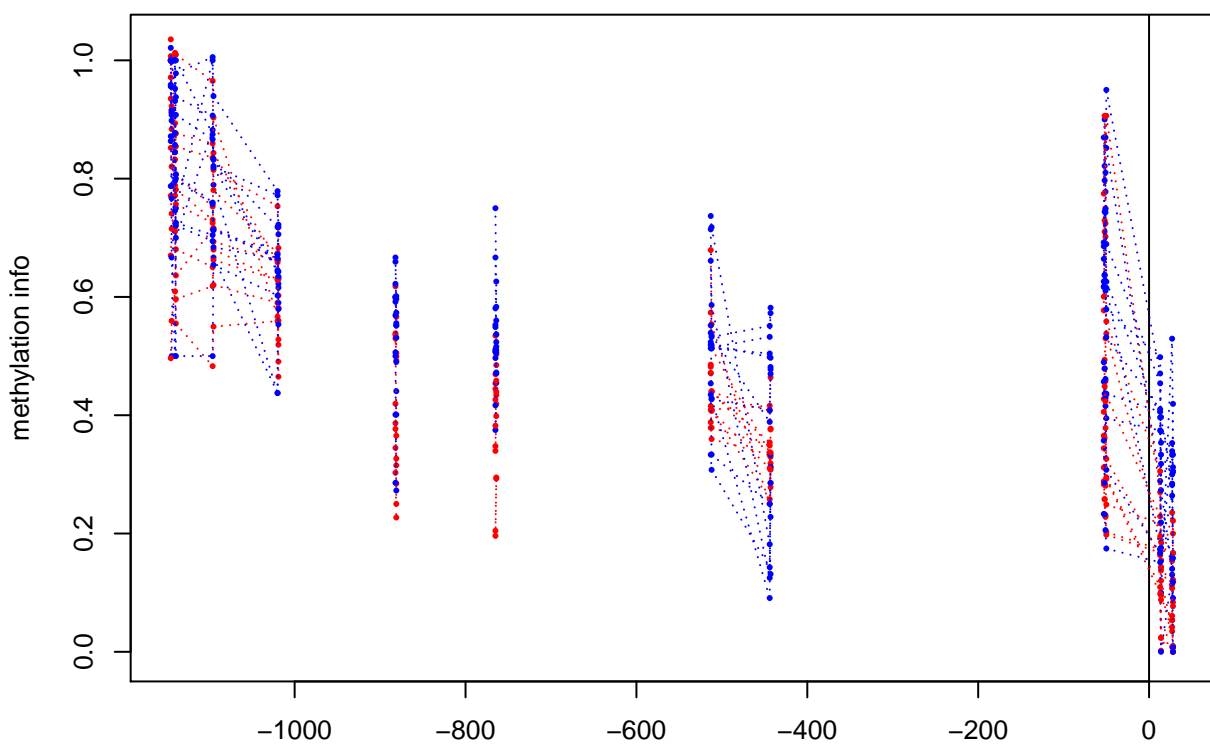

RNAseq logFC(UC-N)= 1.09

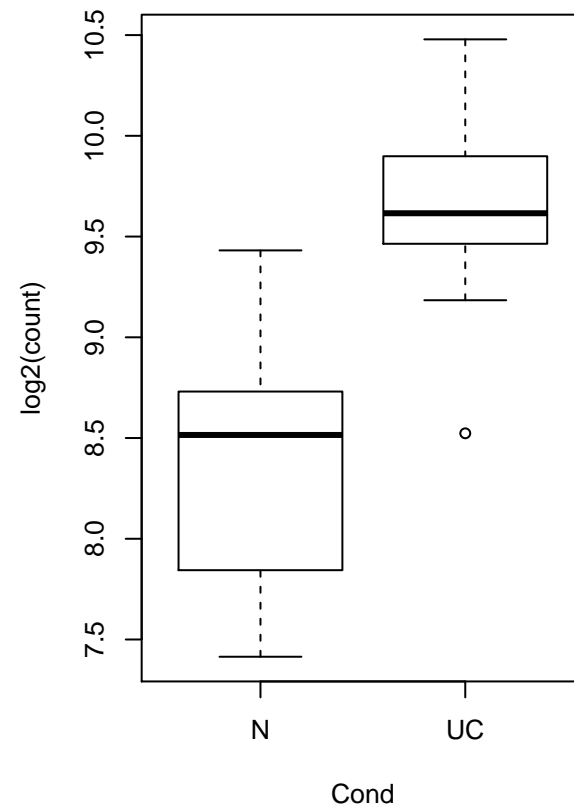

CD300E average UC-N %methylation max=-16.16% min=-18.21%

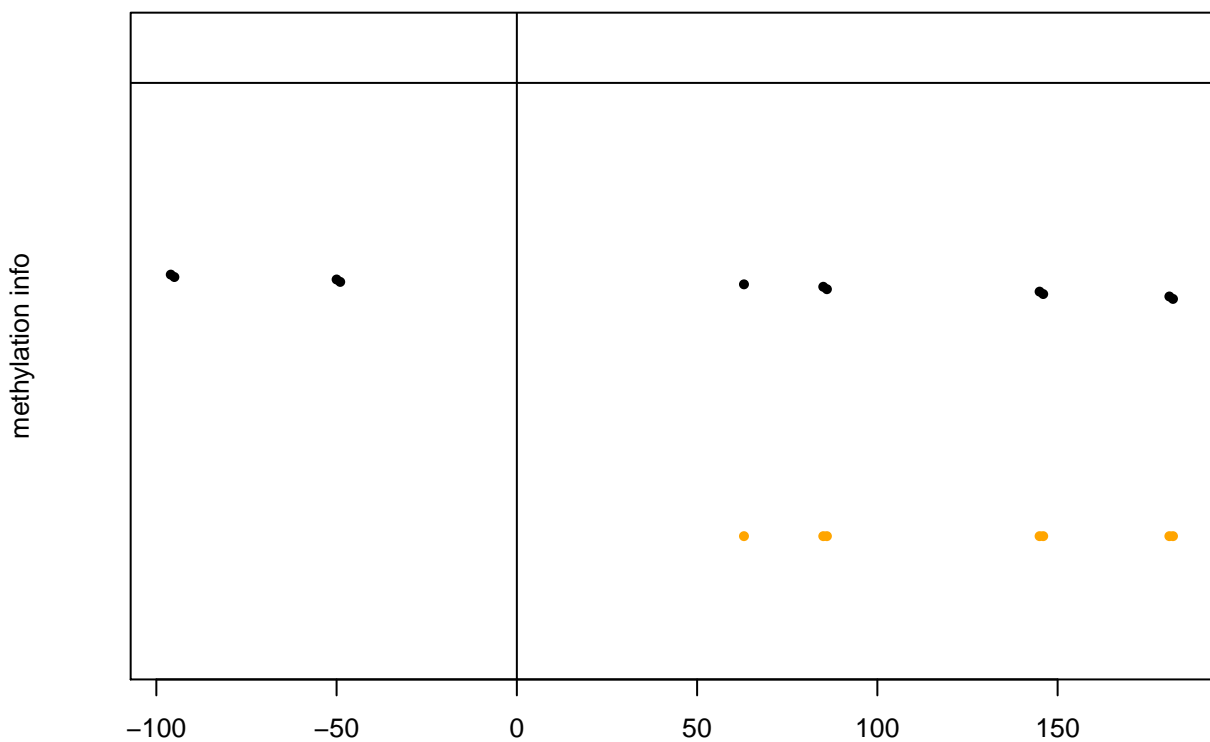

CD300E raw %methylation, red=UC, blue=Normal

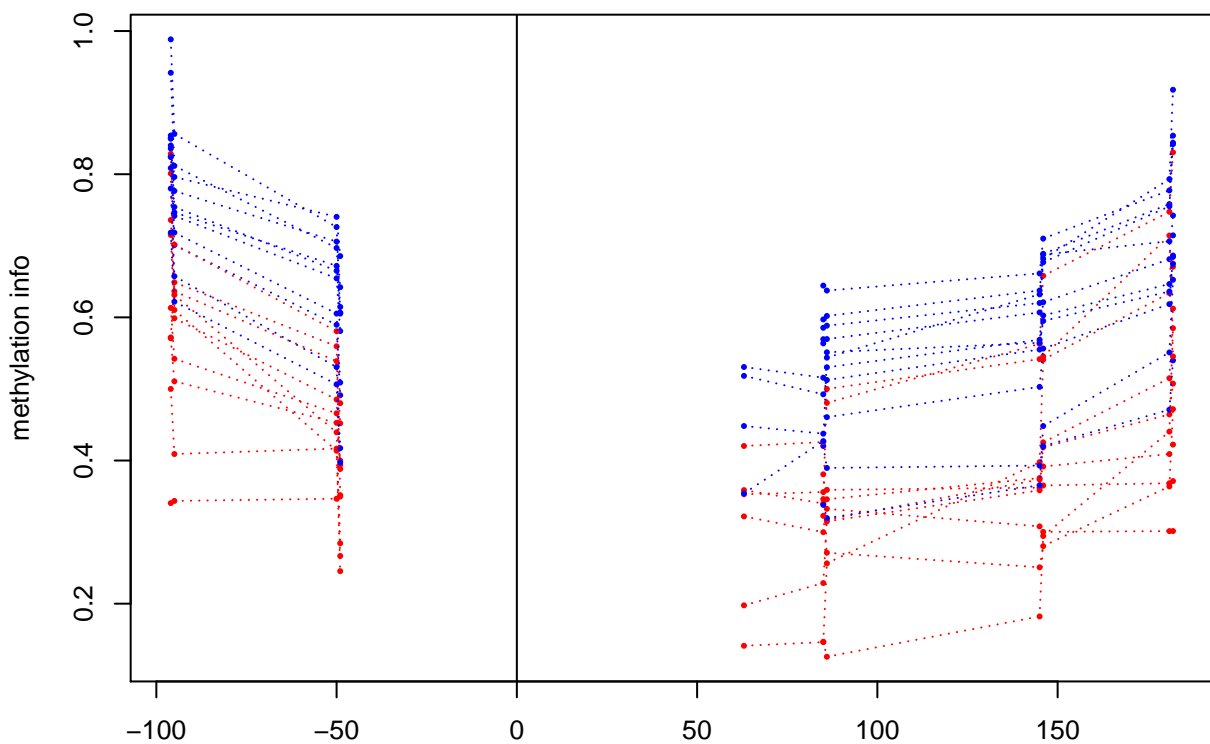

RNAseq logFC(UC-N)= 3.44

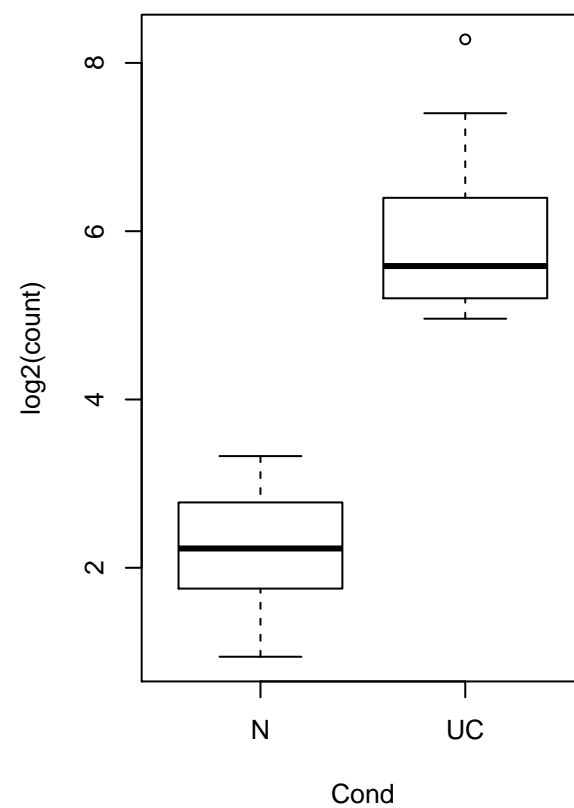

CD38 average UC-N %methylation max=-1.56% min=-16.39%

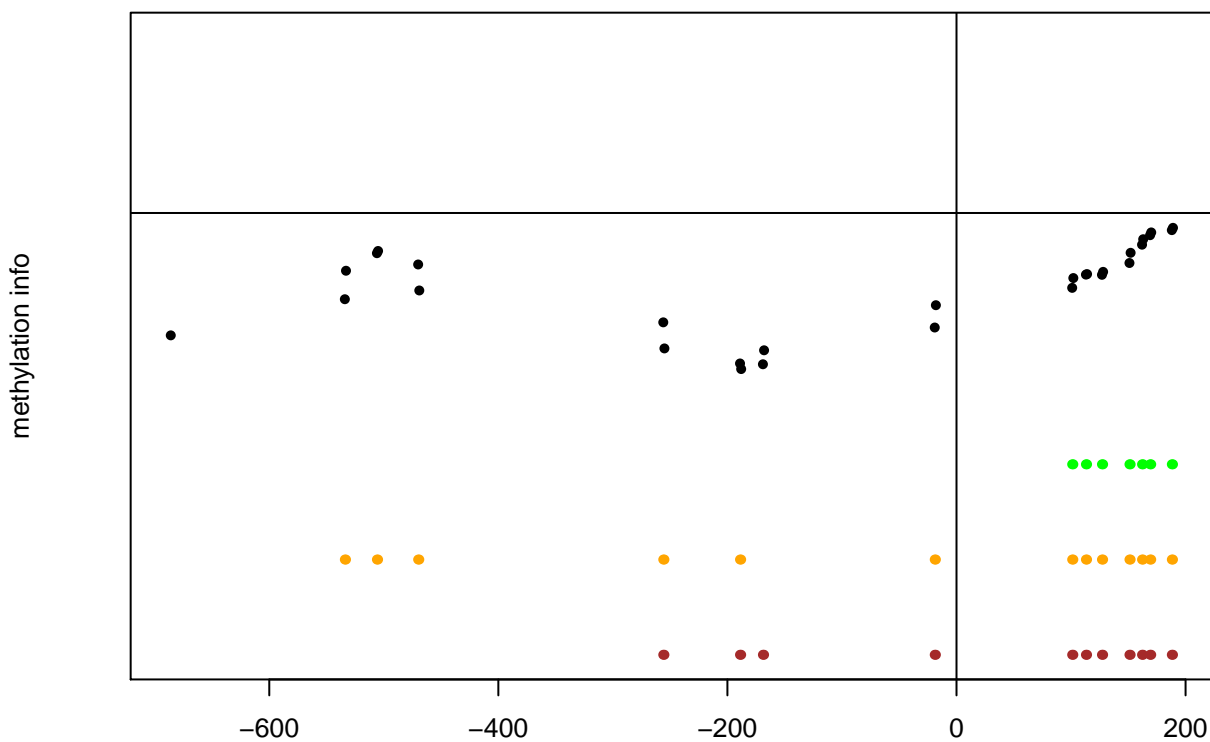

CD38 raw %methylation, red=UC, blue=Normal

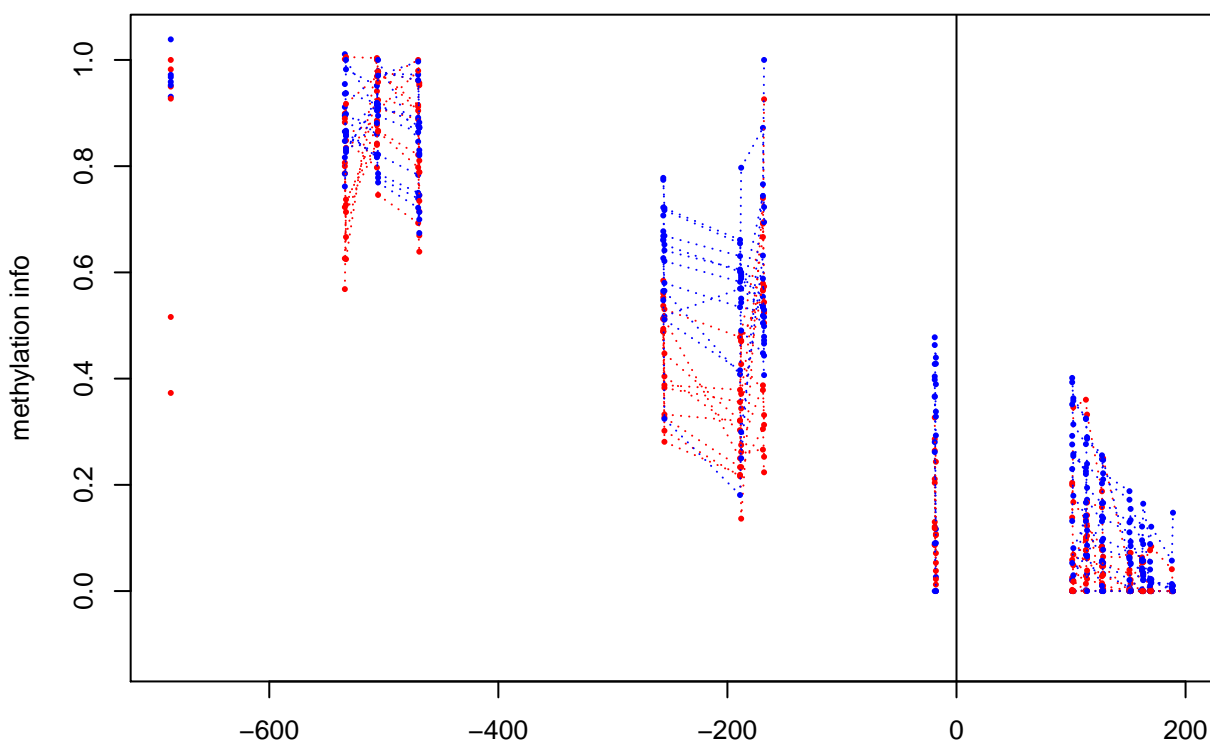

RNAseq logFC(UC-N)= 1.88

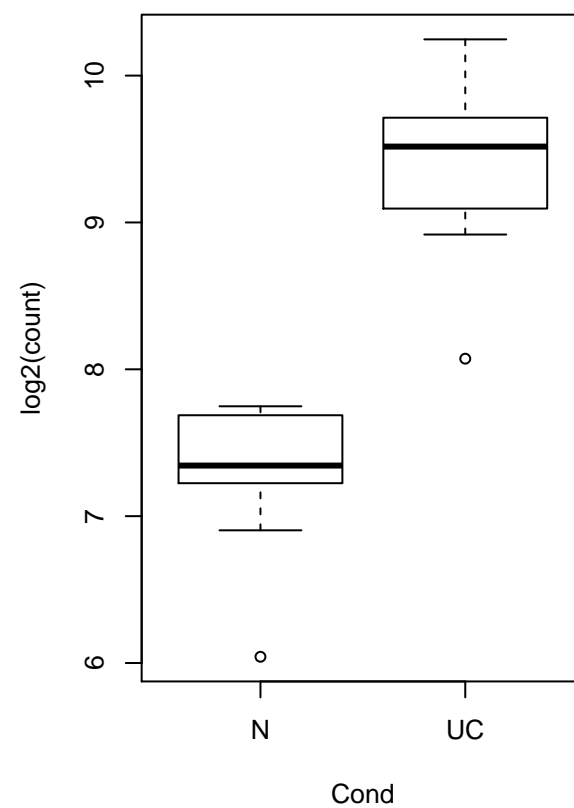

CD3D average UC-N %methylation max=-10.4% min=-23.62%

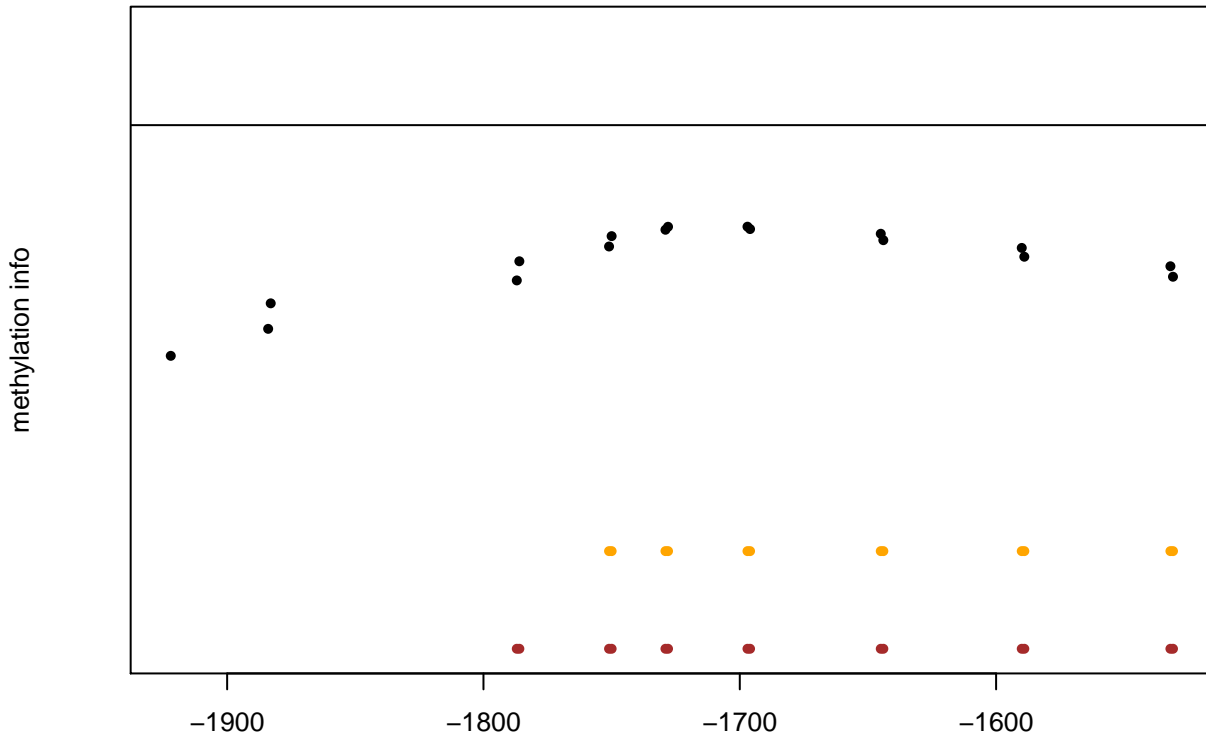

CD3D raw %methylation, red=UC, blue=Normal

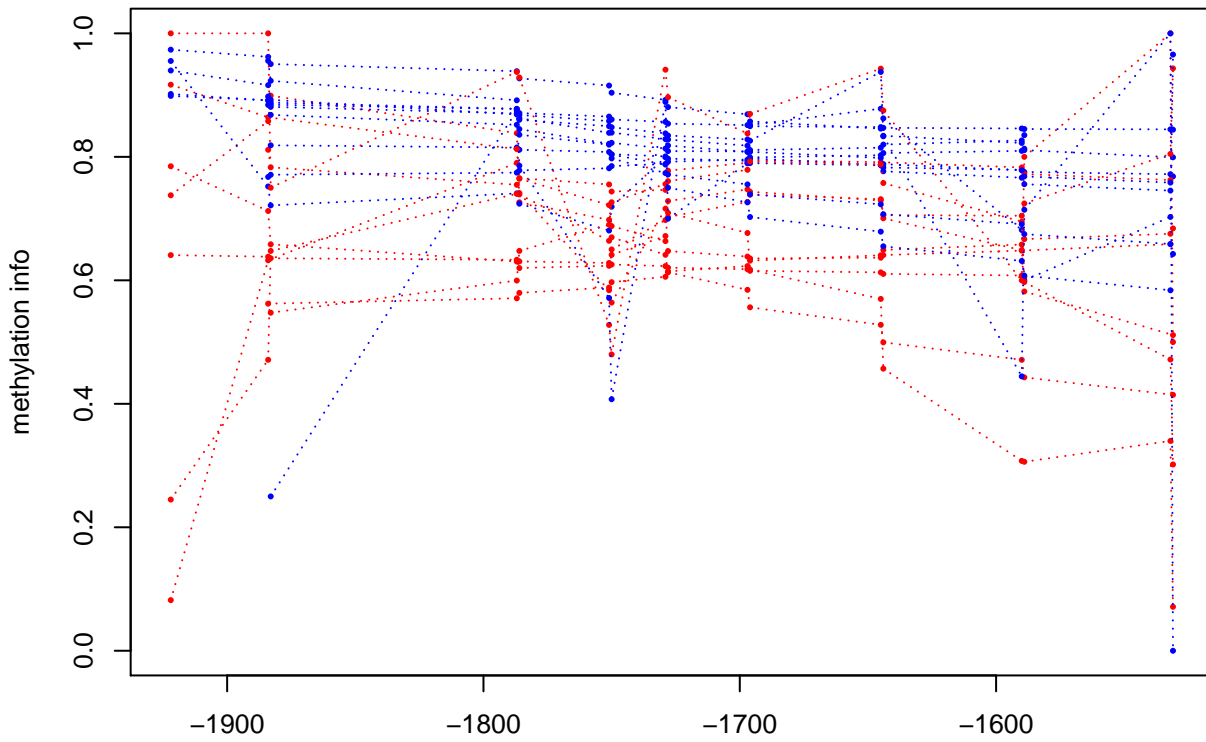

RNAseq logFC(UC-N)= 1.34

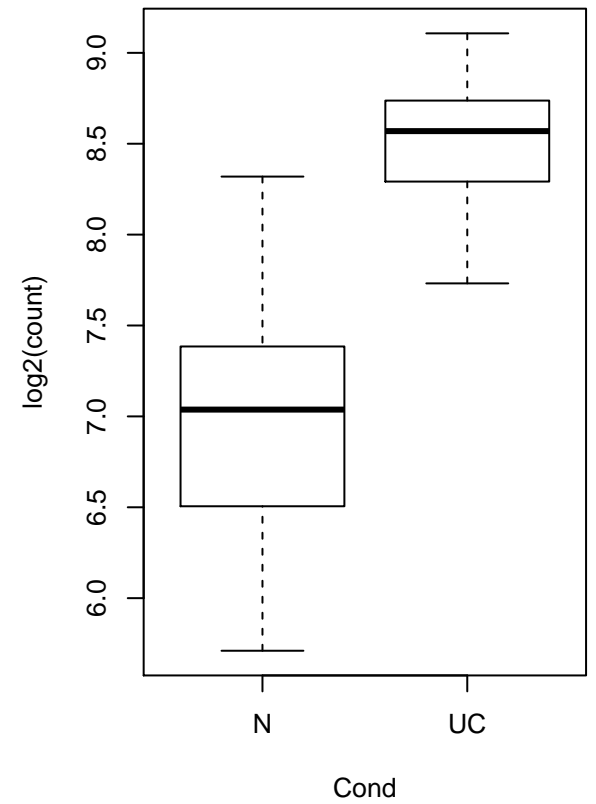



CD3E average UC-N %methylation max=3.31% min=-29.69%

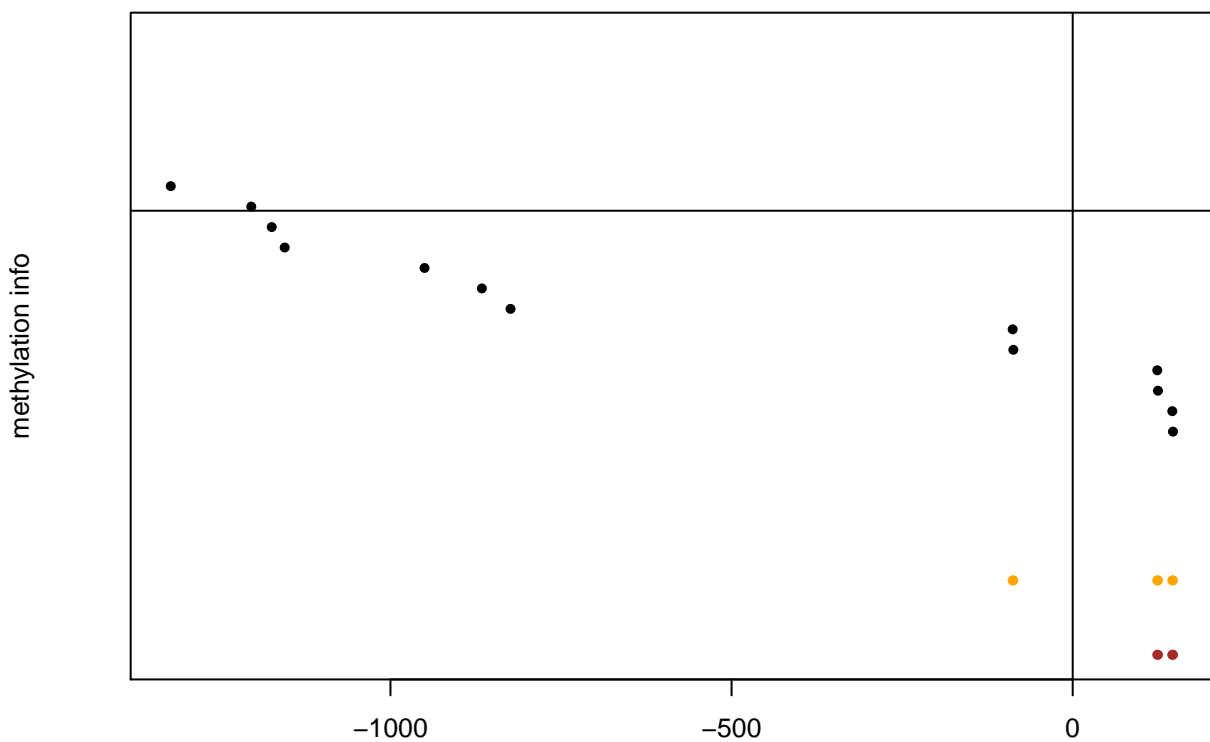

CD3E raw %methylation, red=UC, blue=Normal

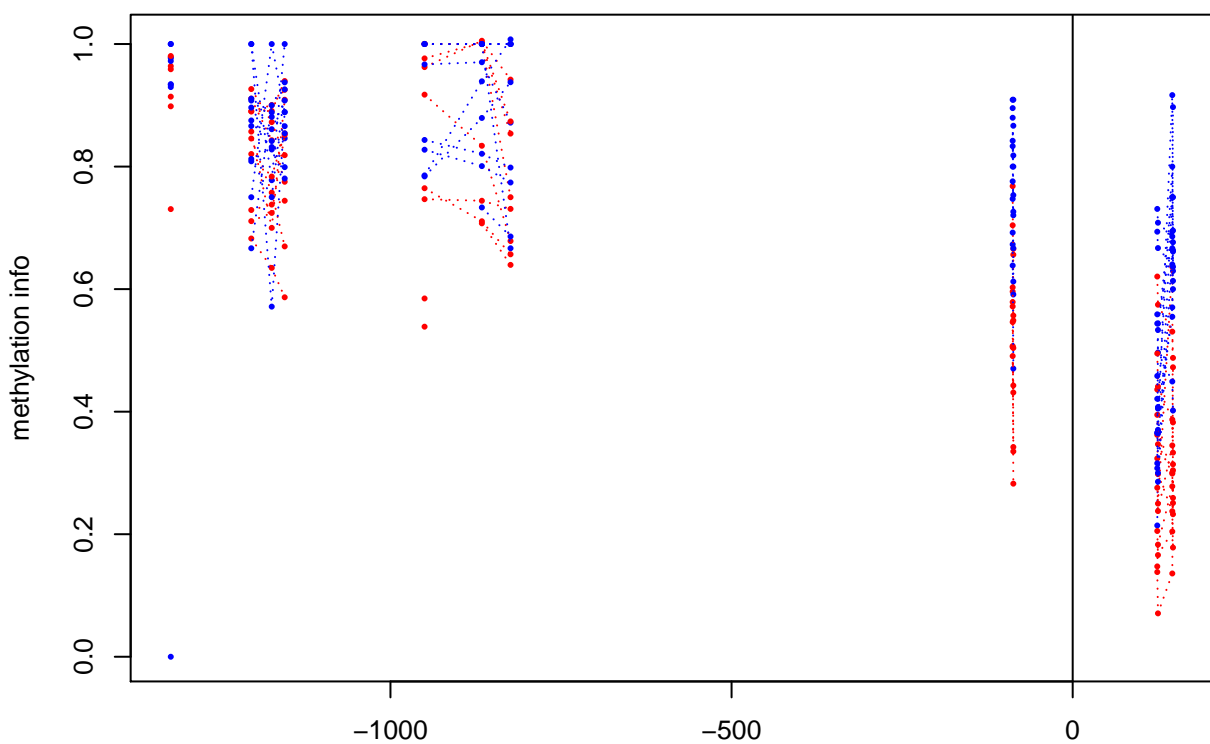

RNAseq logFC(UC-N)= 1.19

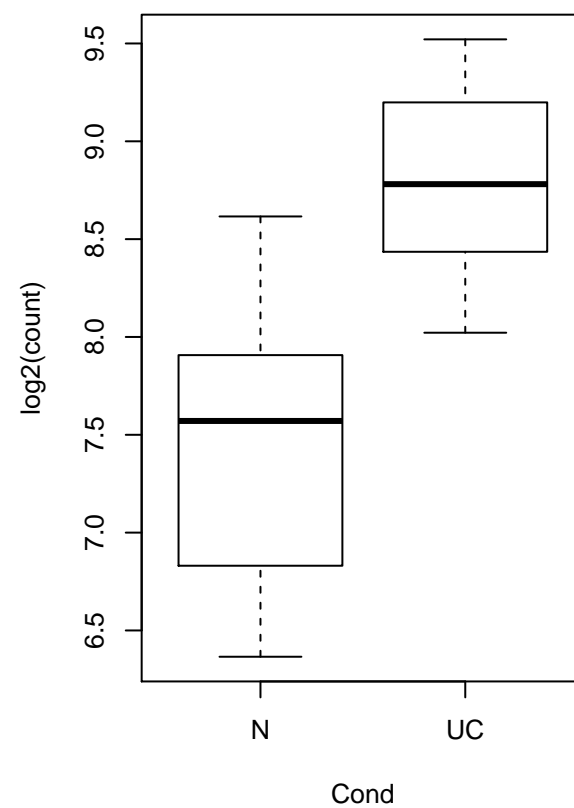

CD3G average UC-N %methylation max=-10.04% min=-25.87%

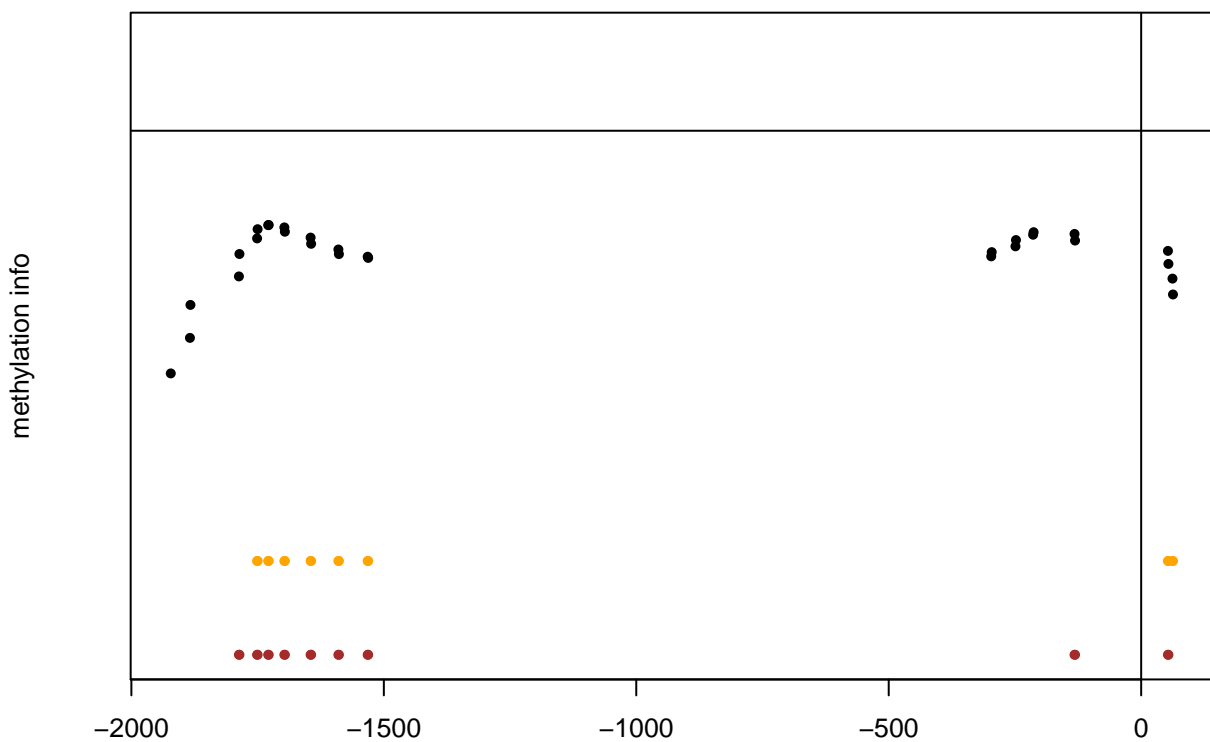

CD3G raw %methylation, red=UC, blue=Normal

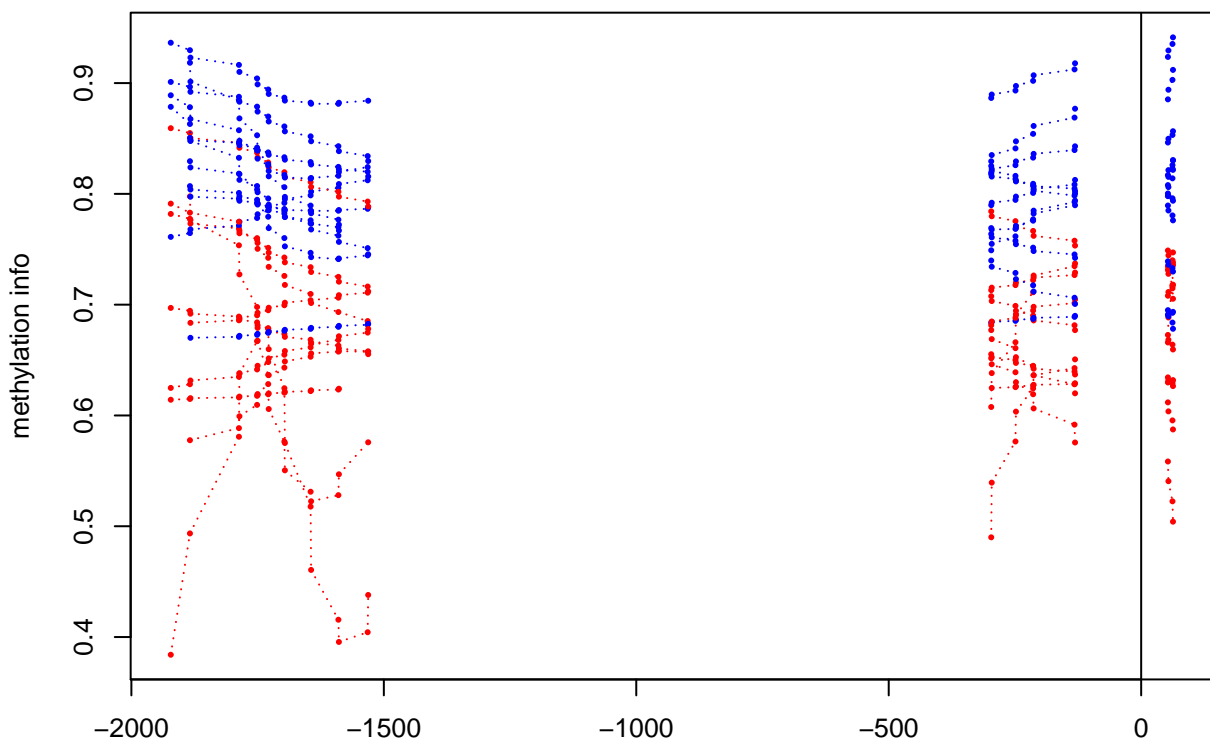

RNAseq logFC(UC-N)= 1.09

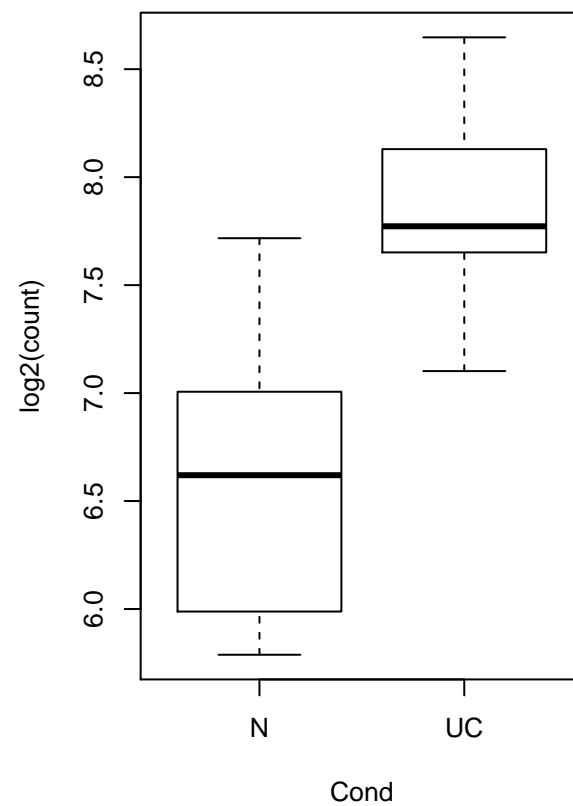

CD40 average UC-N %methylation max=-0.52% min=-14.74%

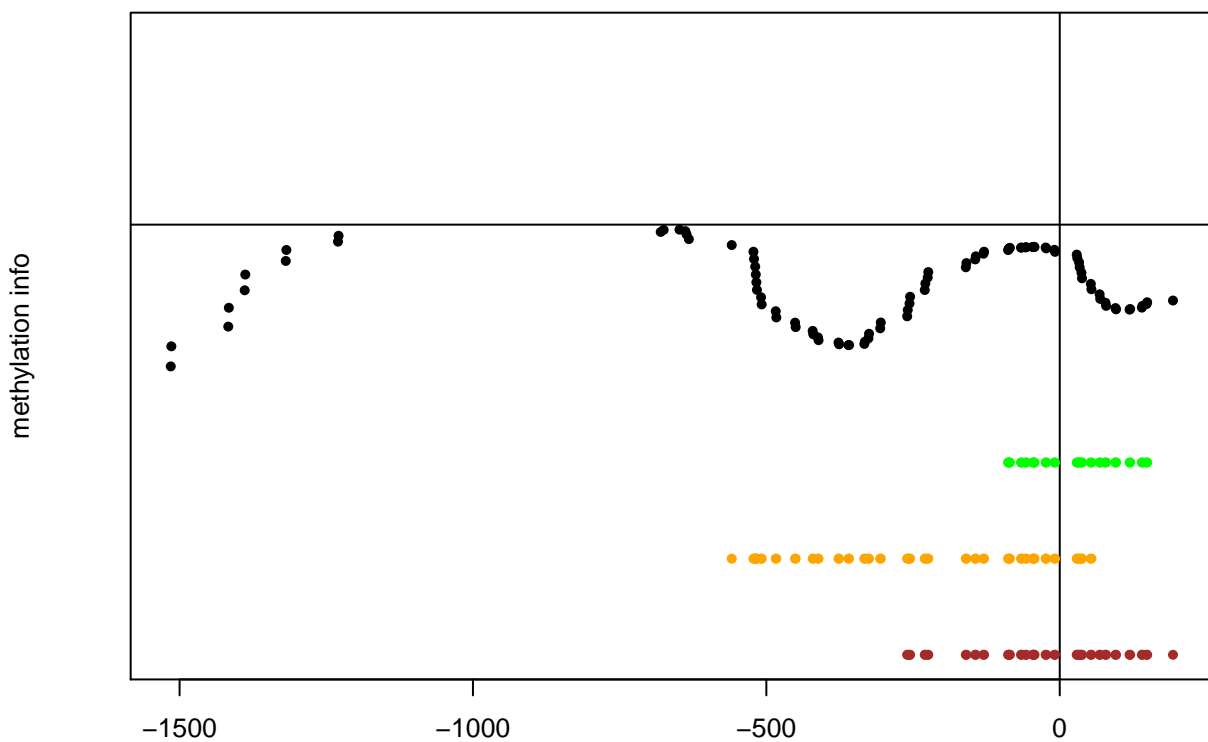

CD40 raw %methylation, red=UC, blue=Normal

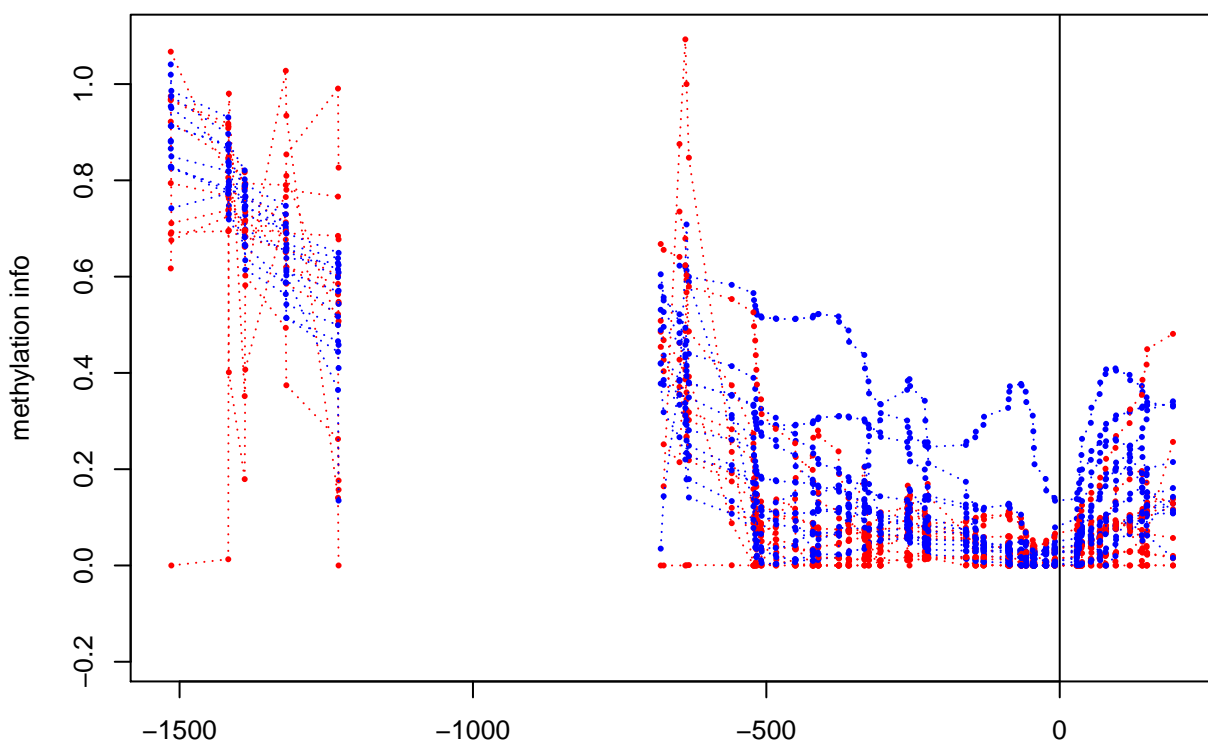

RNAseq logFC(UC-N)= 1.65

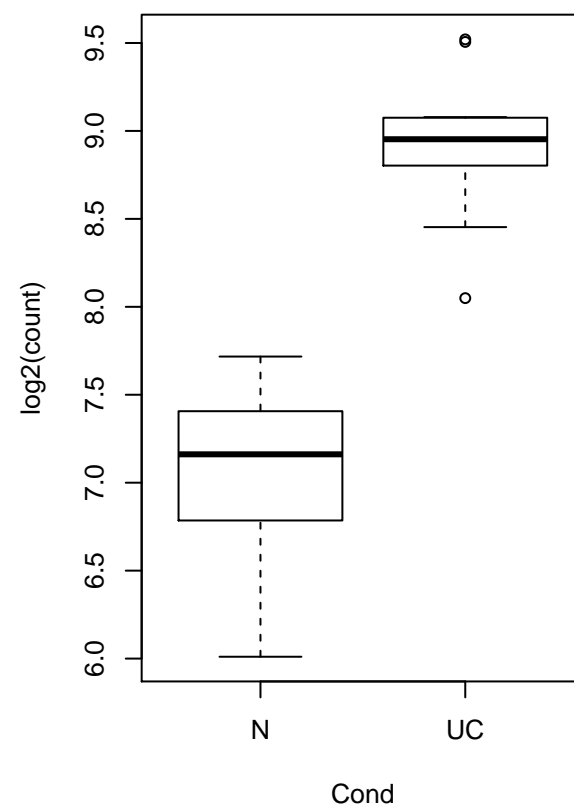

CD52 average UC-N %methylation max=-11.68% min=-34.01%

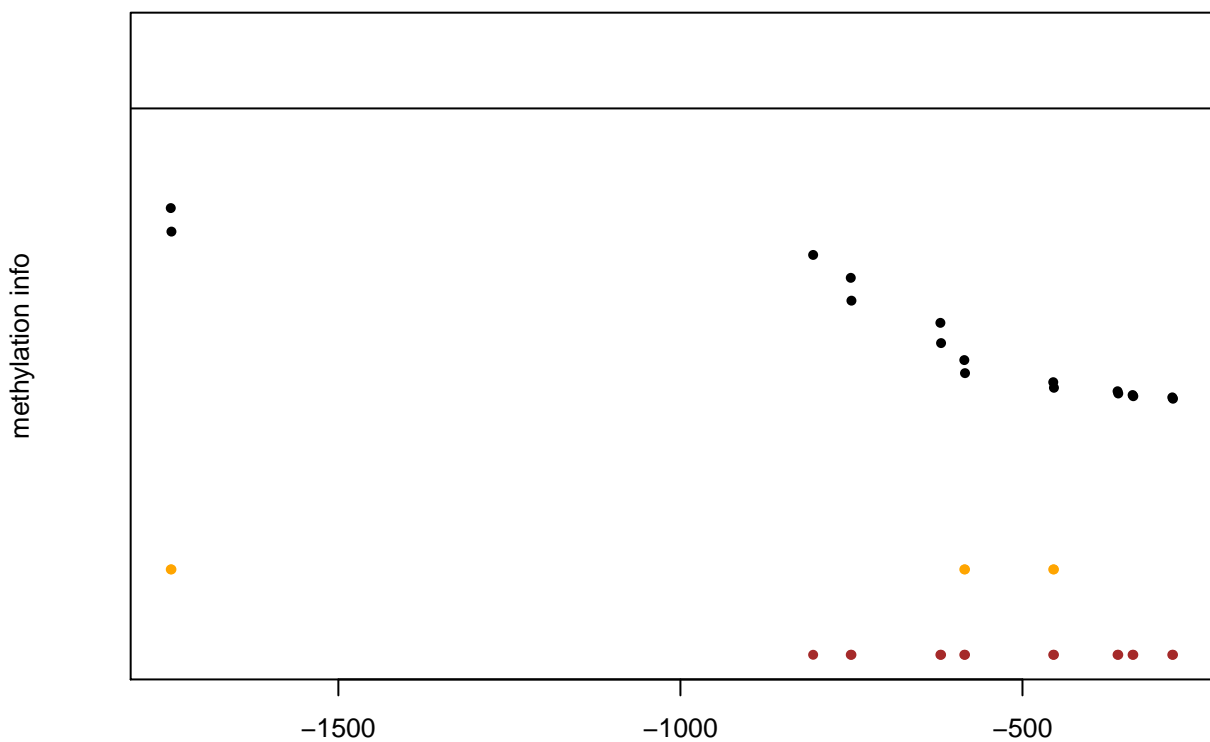

CD52 raw %methylation, red=UC, blue=Normal

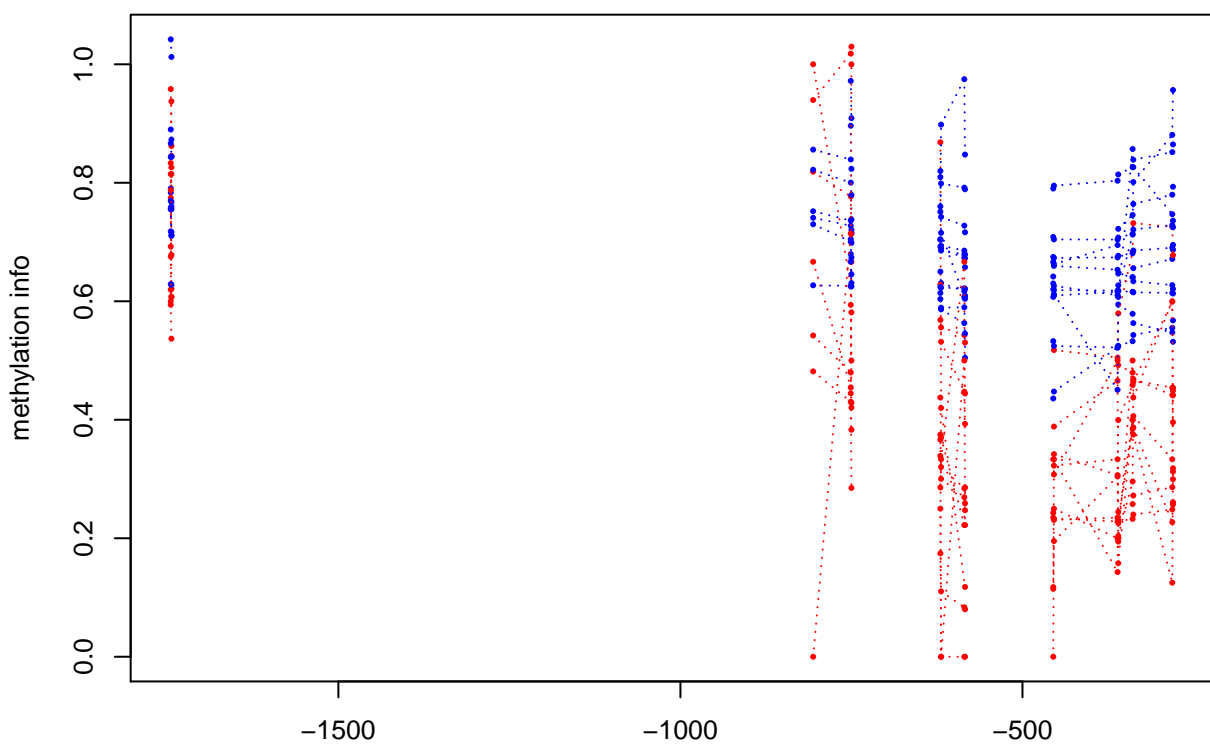

RNAseq logFC(UC-N)= 1.35

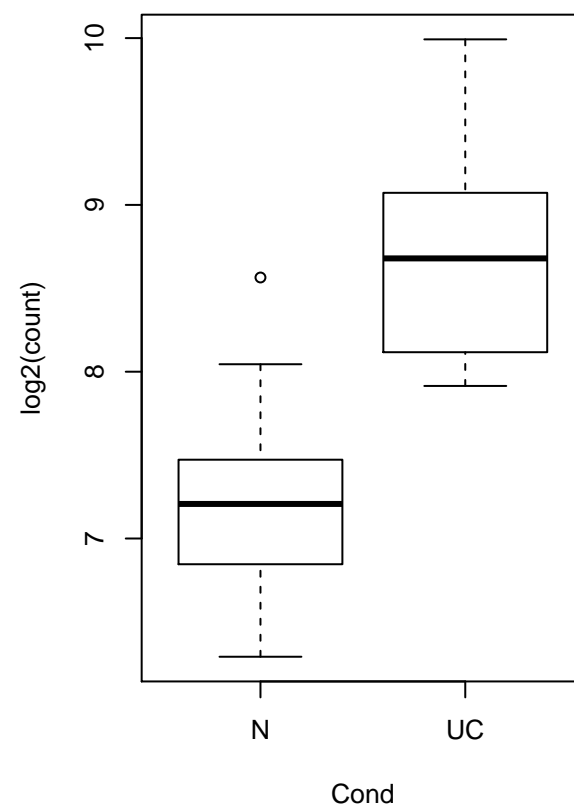

CD53 average UC-N %methylation max=-6.25% min=-40.75%

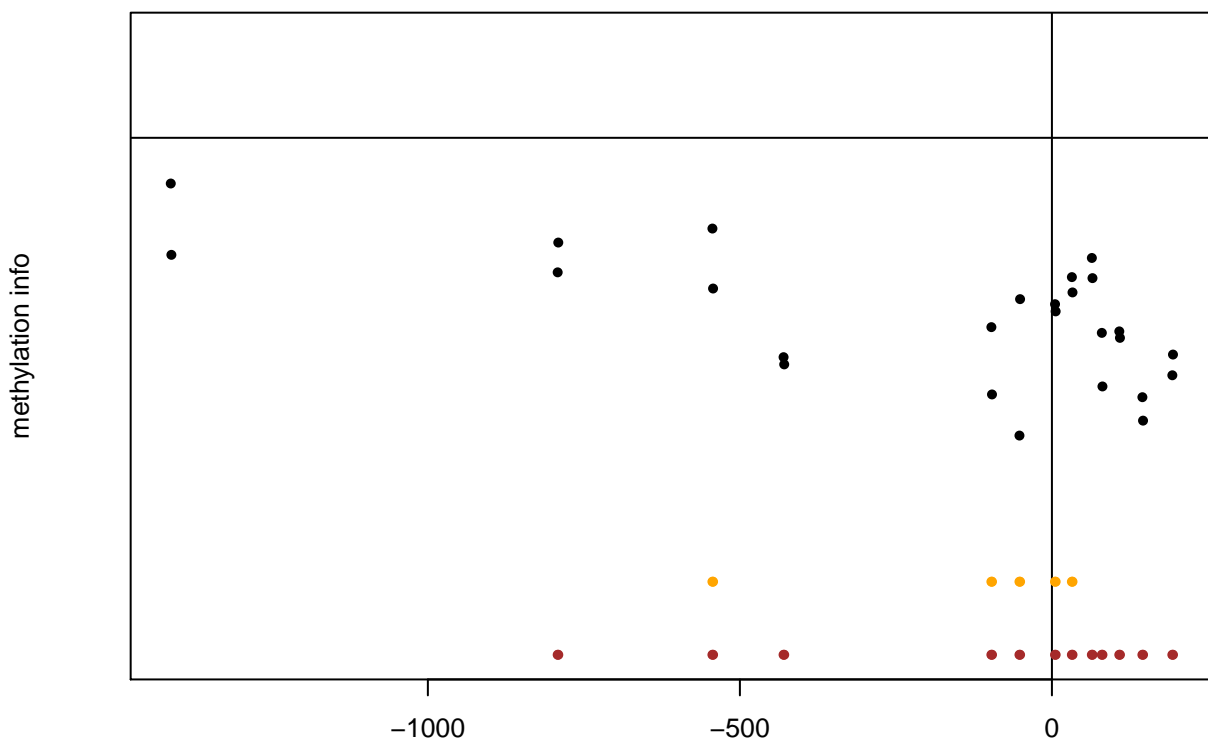

CD53 raw %methylation, red=UC, blue=Normal

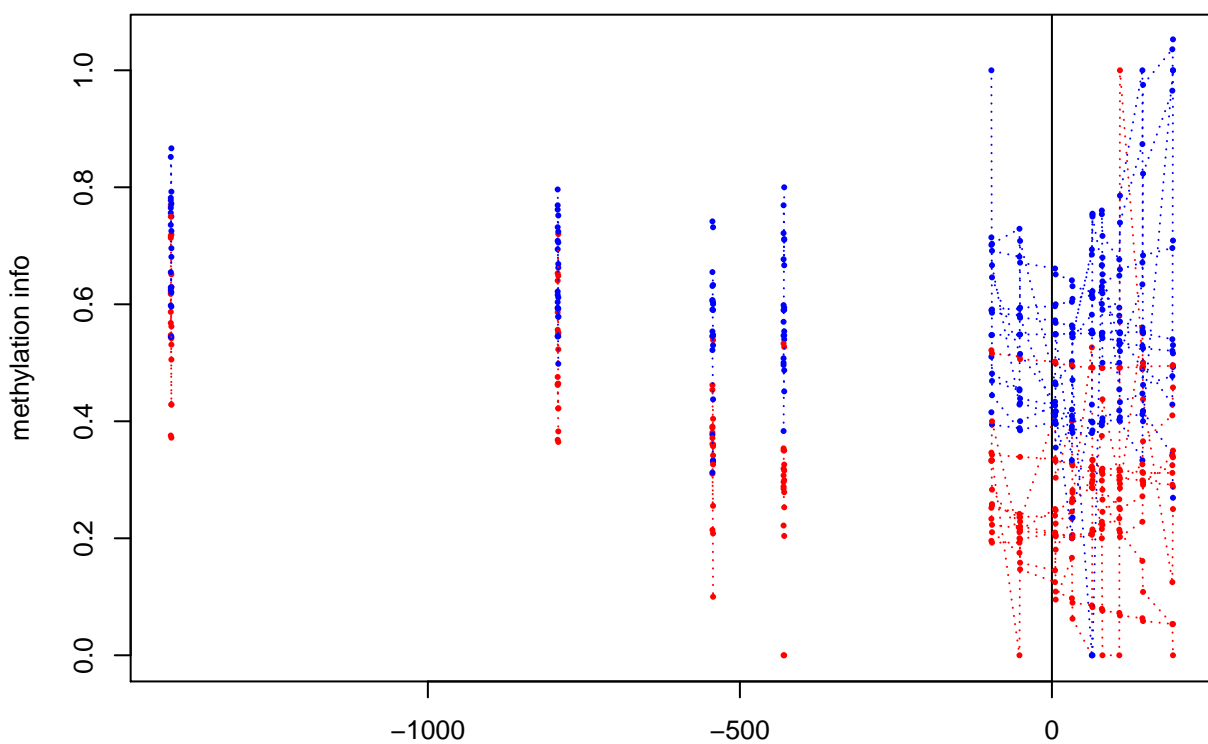

RNAseq logFC(UC-N)= 1.07

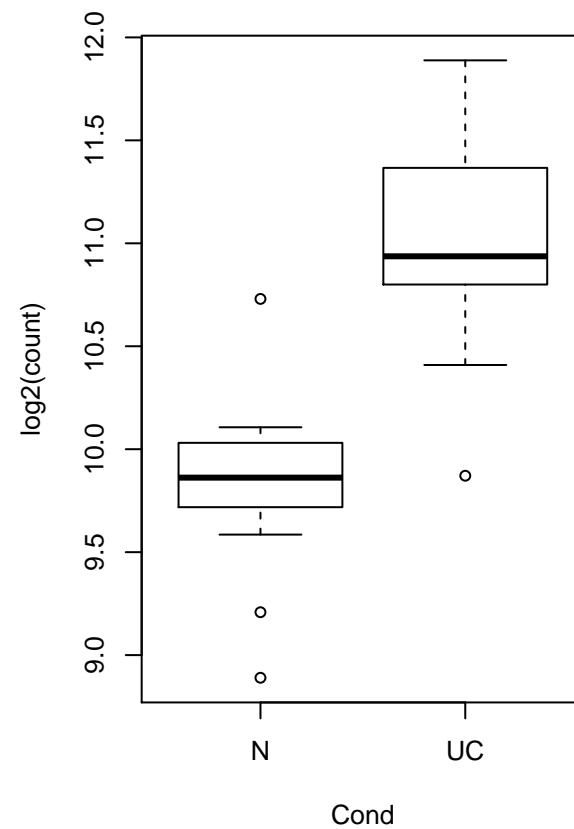

CD69 average UC-N %methylation max=-19.52% min=-28.56%

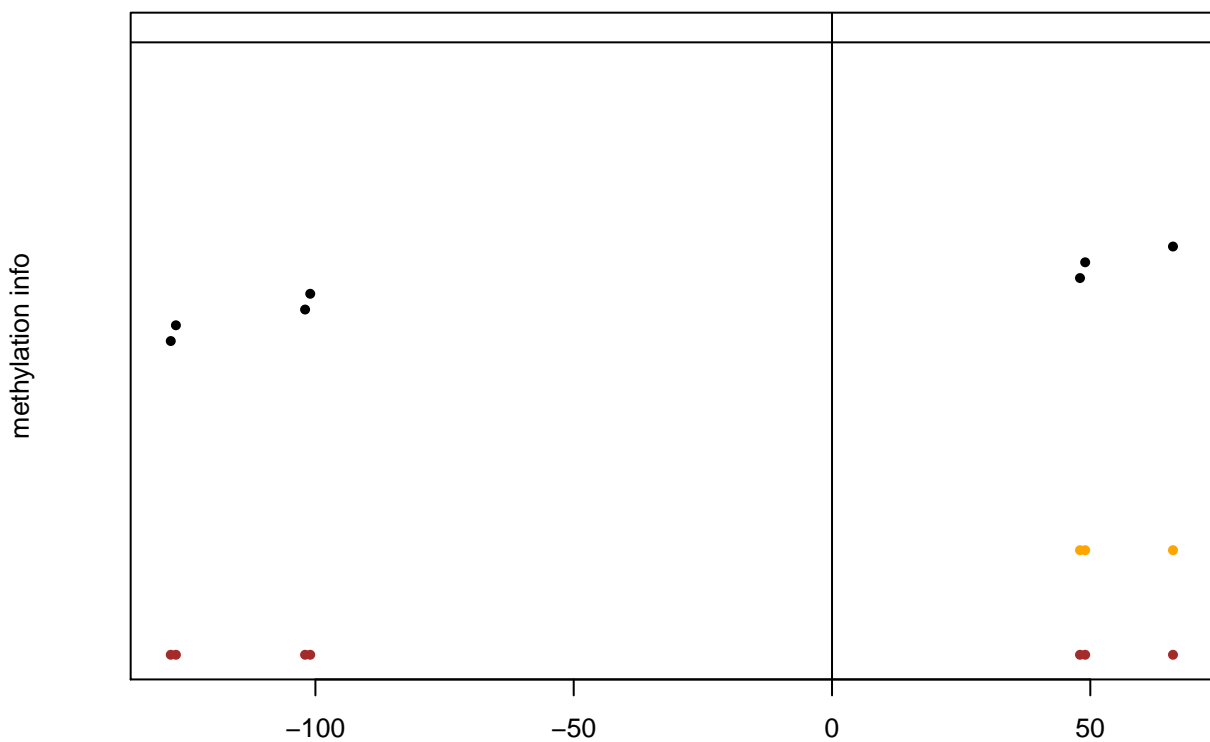

CD69 raw %methylation, red=UC, blue=Normal

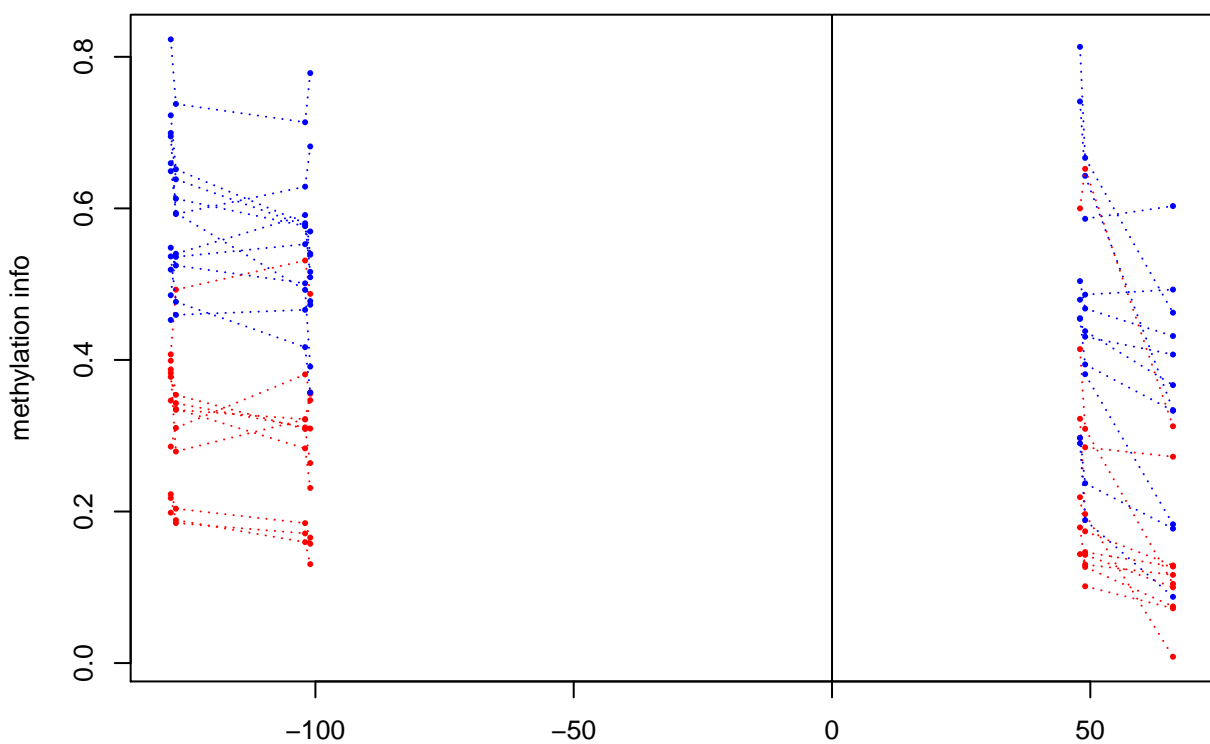

RNAseq logFC(UC-N)= 1.08

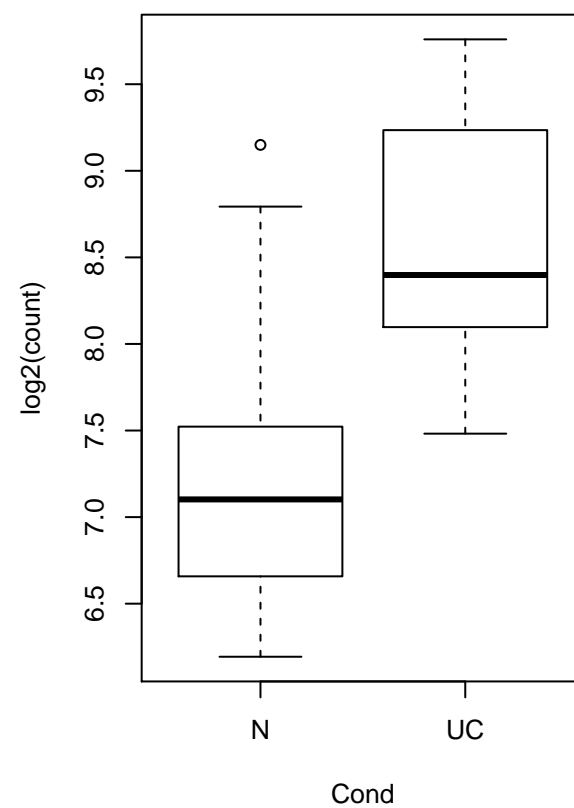

CD6 average UC-N %methylation max=1.11% min=-38.28%

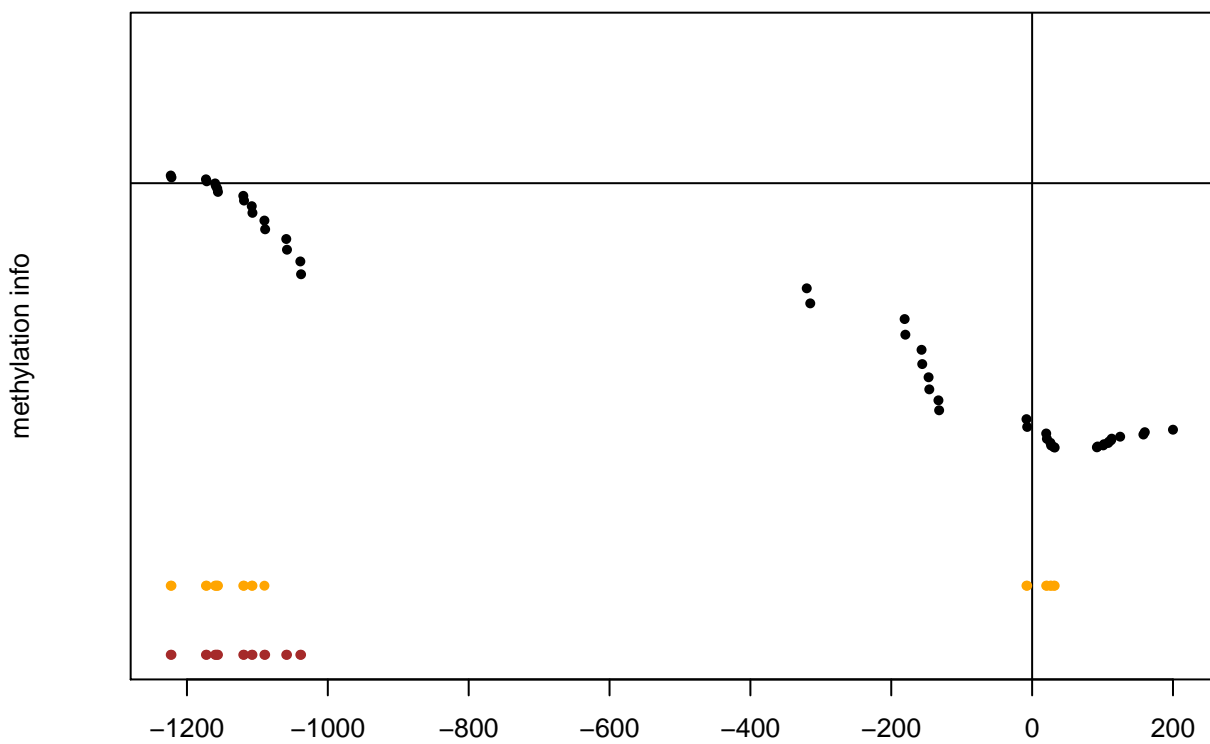

CD6 raw %methylation, red=UC, blue=Normal

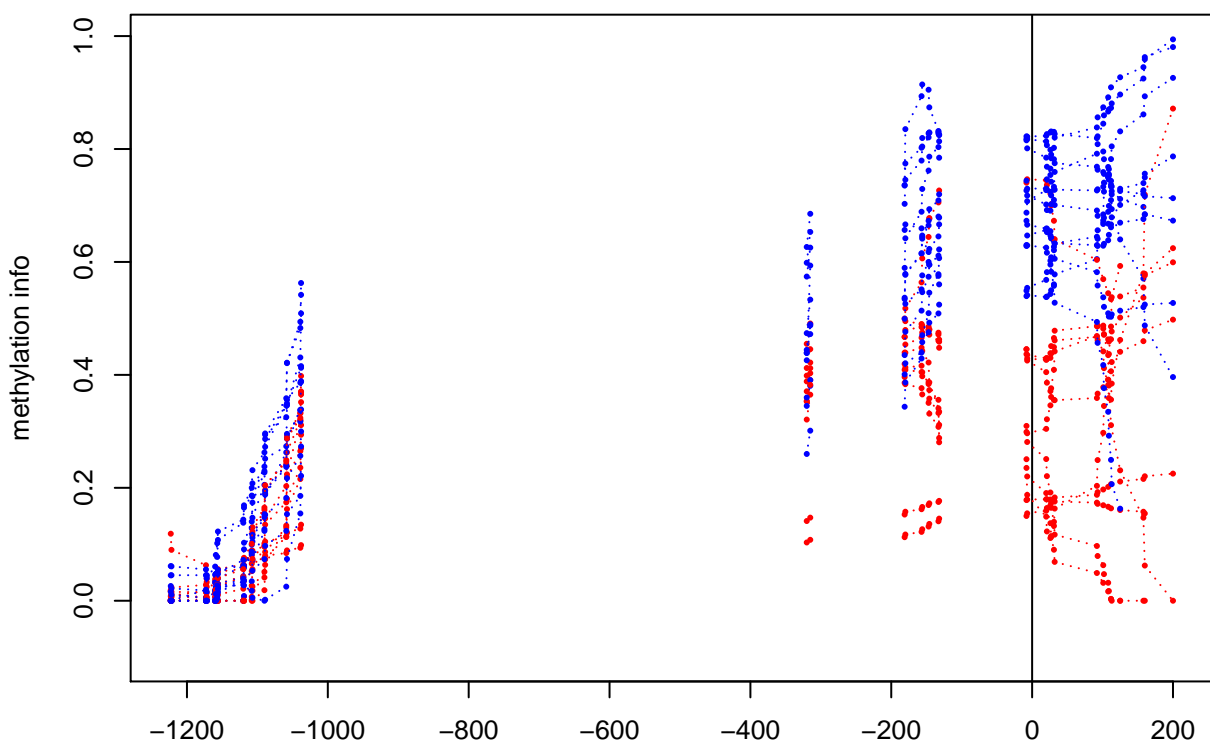

RNAseq logFC(UC-N)= 1.45

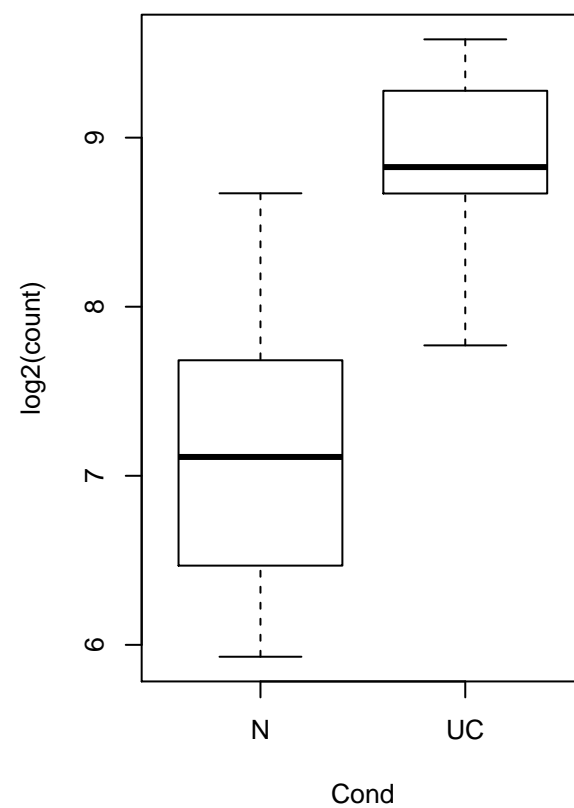

CD74 average UC-N %methylation max=-1.23% min=-4.05%

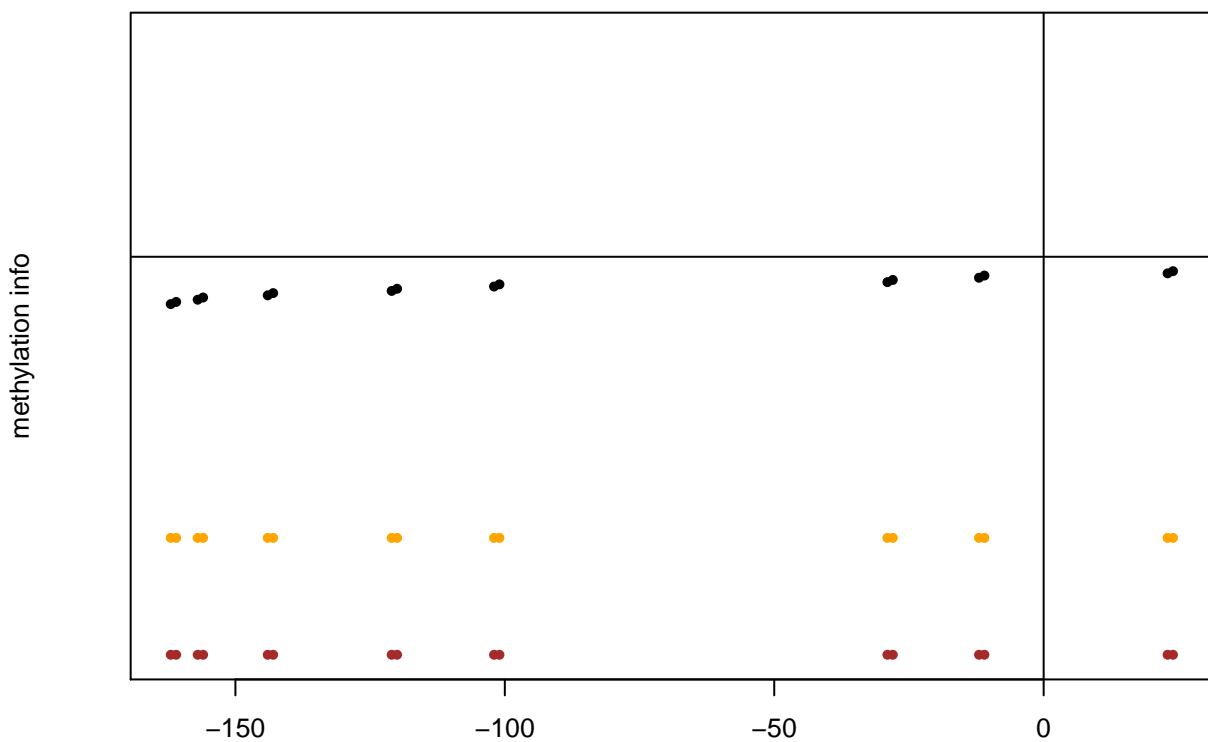

CD74 raw %methylation, red=UC, blue=Normal

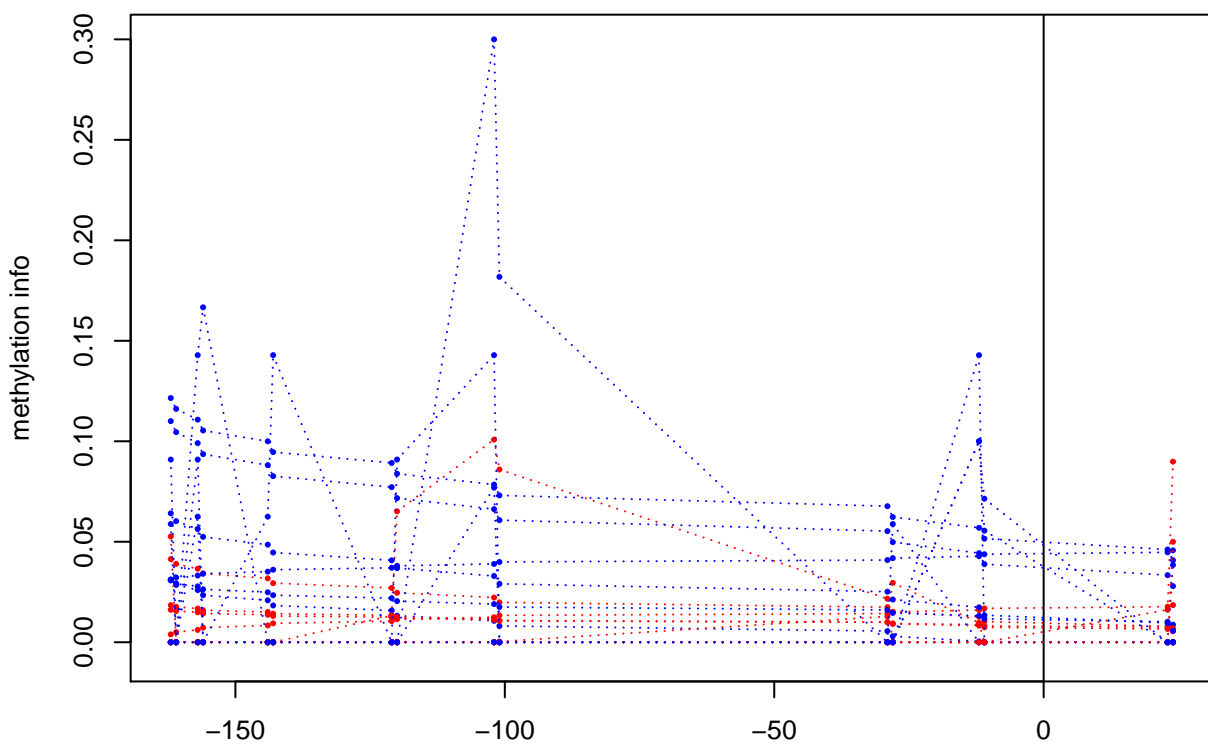

RNAseq logFC(UC-N)= 1.12

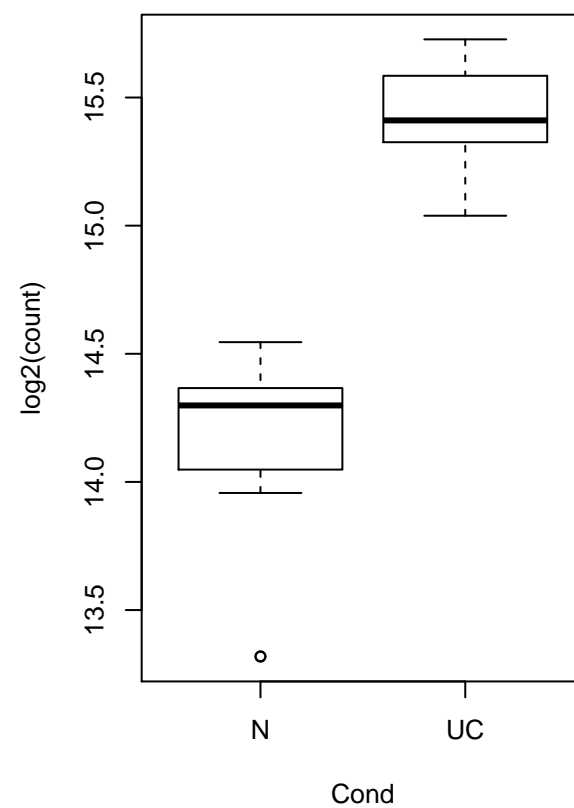



CD79A average UC-N %methylation max=-9.93% min=-28.48%

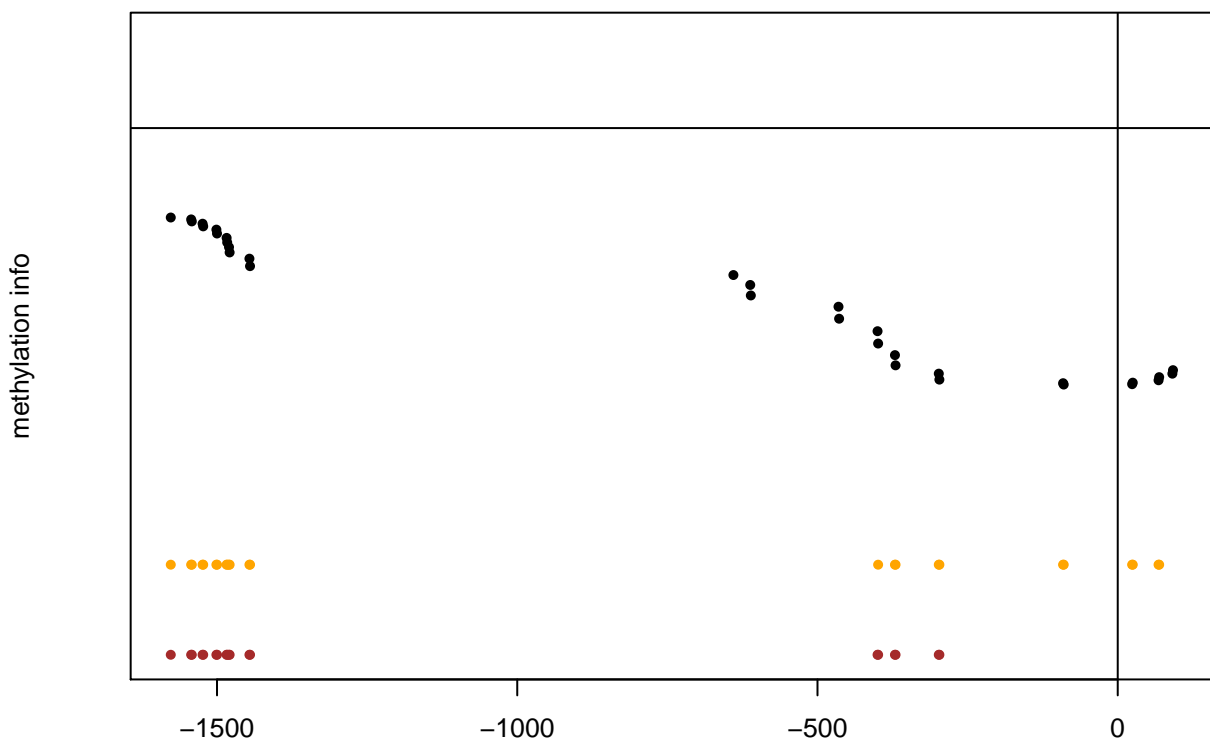

CD79A raw %methylation, red=UC, blue=Normal

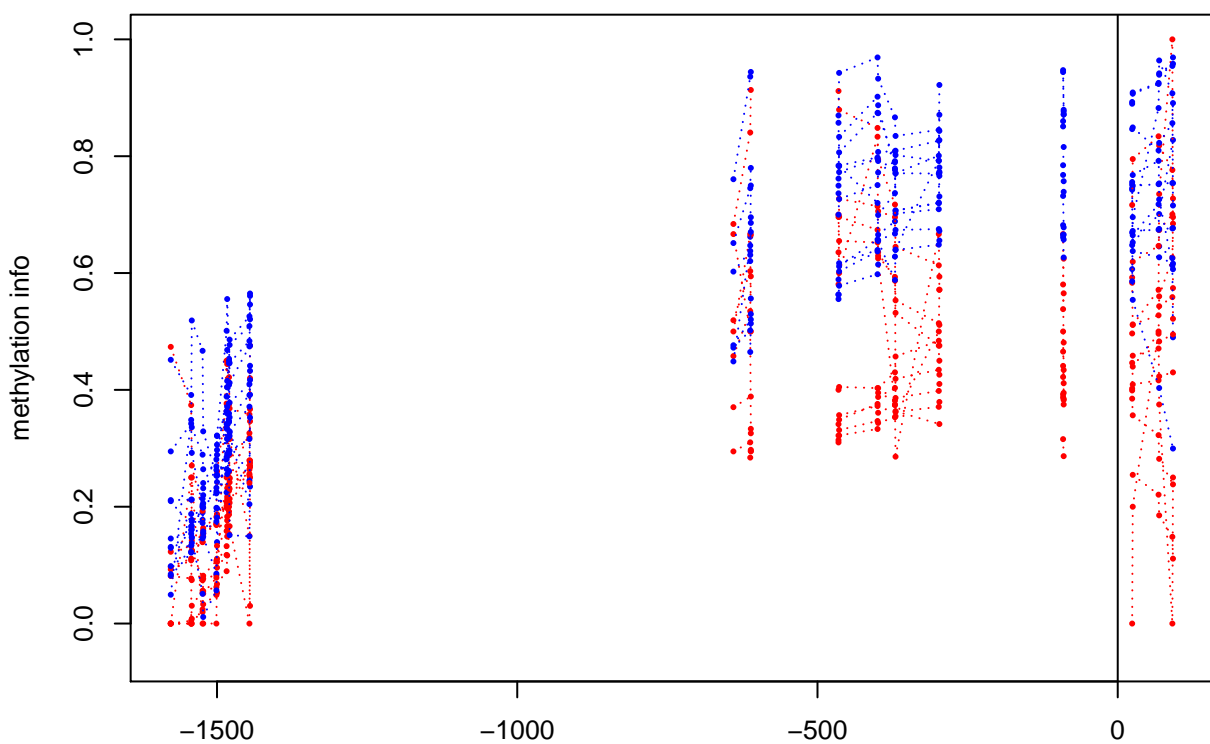

RNAseq logFC(UC-N)= 1.62

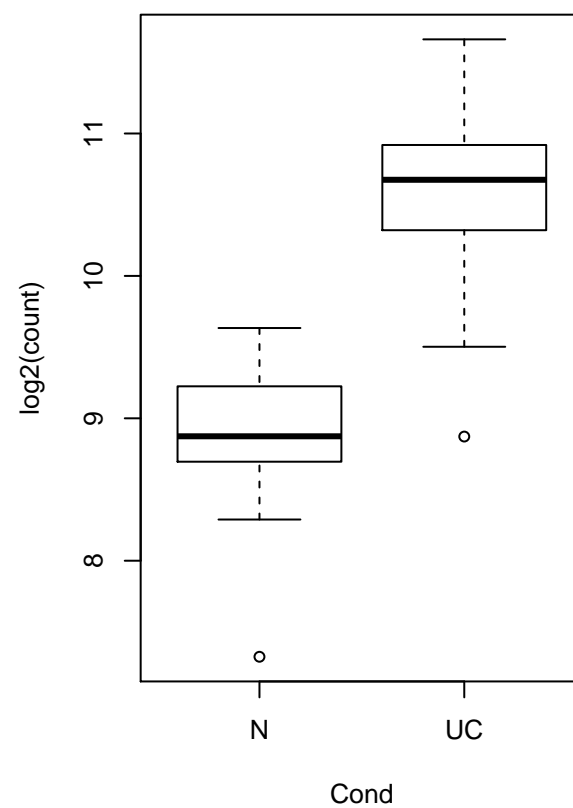

CD79B average UC-N %methylation max=-18.55% min=-34.77%

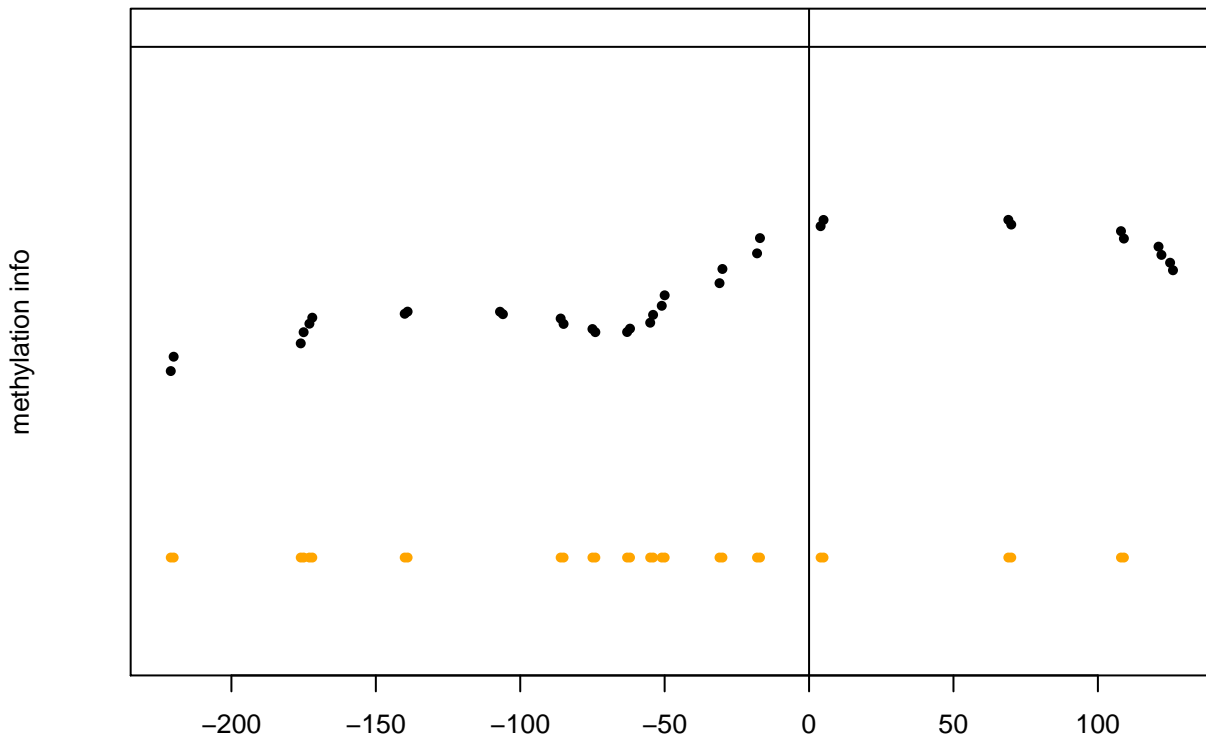

CD79B raw %methylation, red=UC, blue=Normal

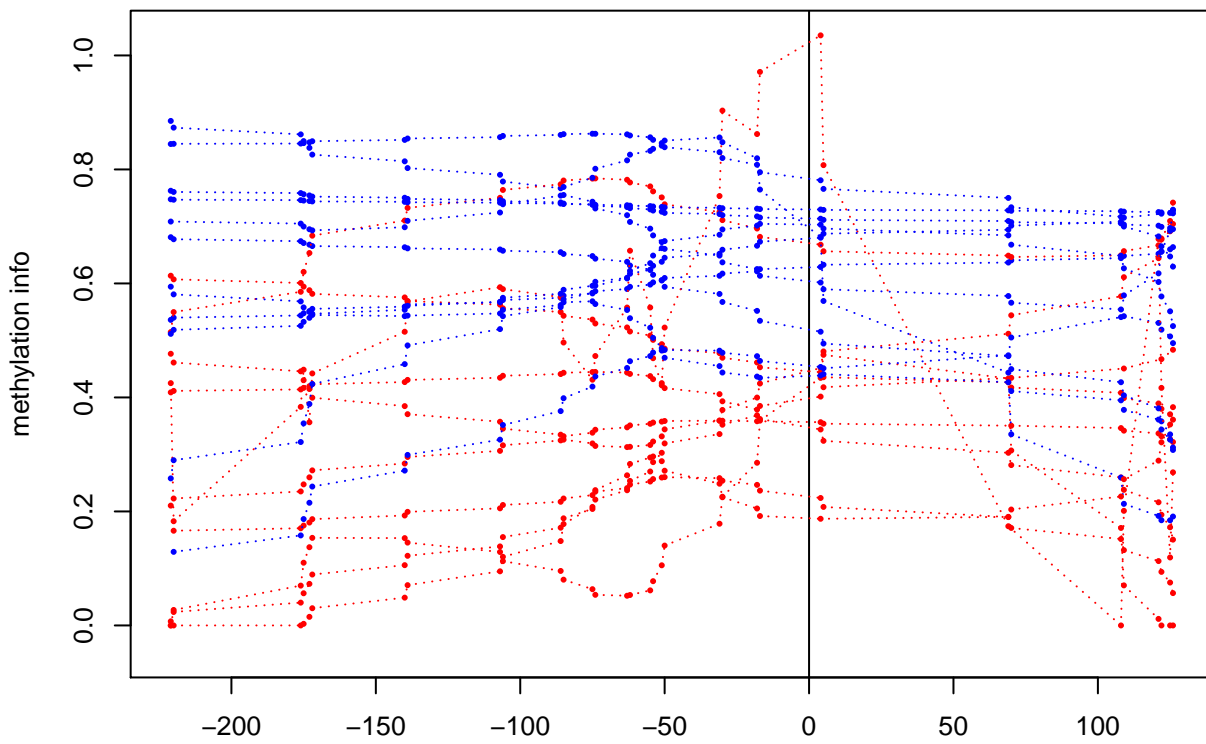

RNAseq logFC(UC-N)= 2.07

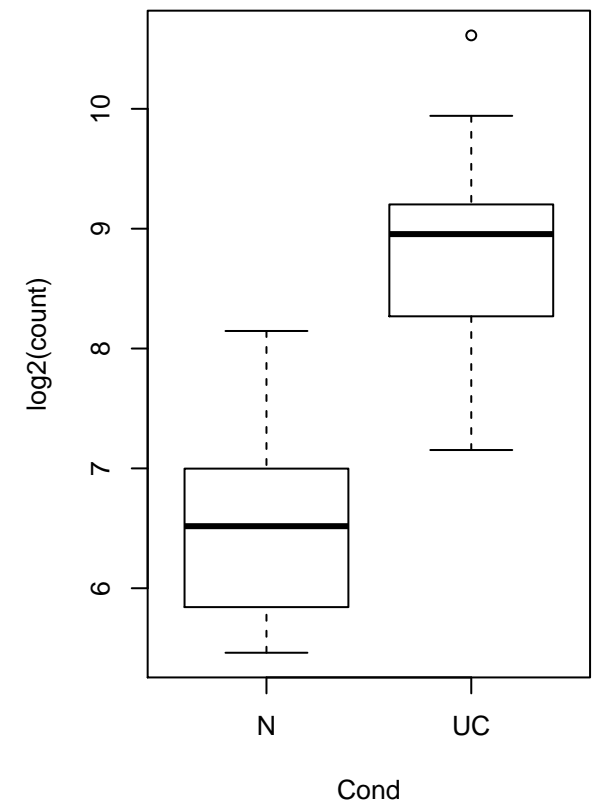

CD7 average UC-N %methylation max=8.58% min=-26.09%

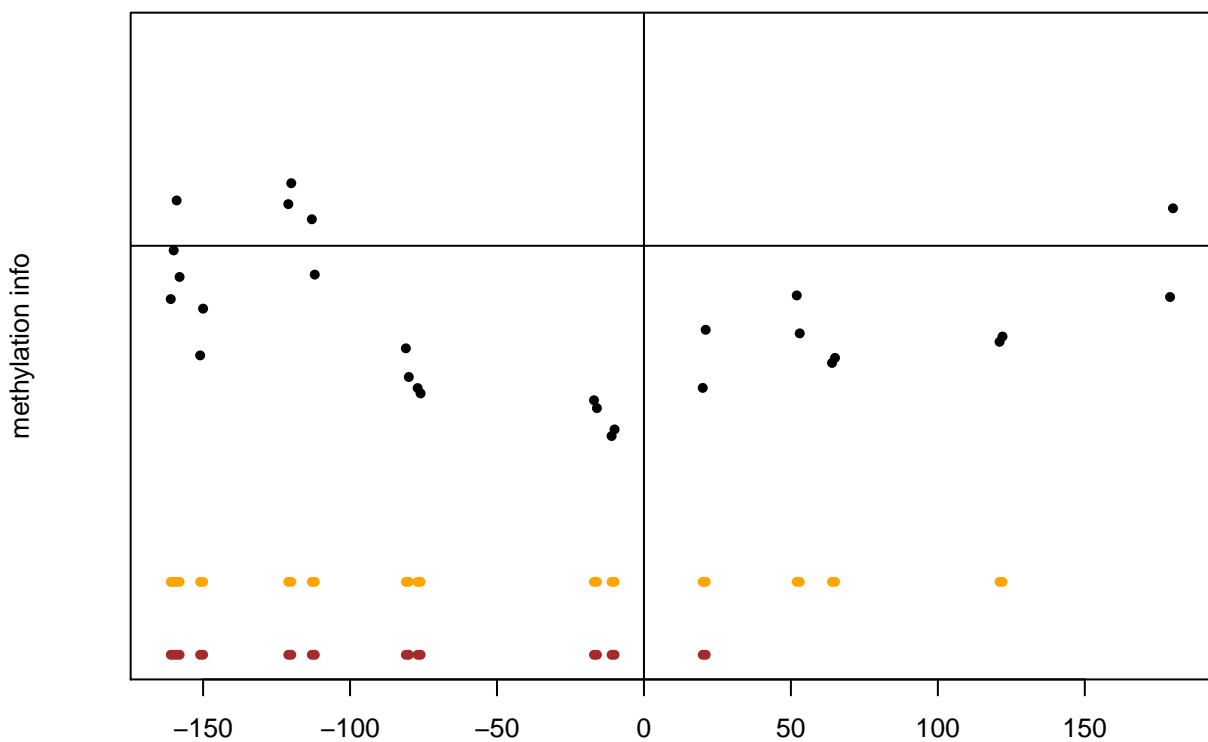

CD7 raw %methylation, red=UC, blue=Normal

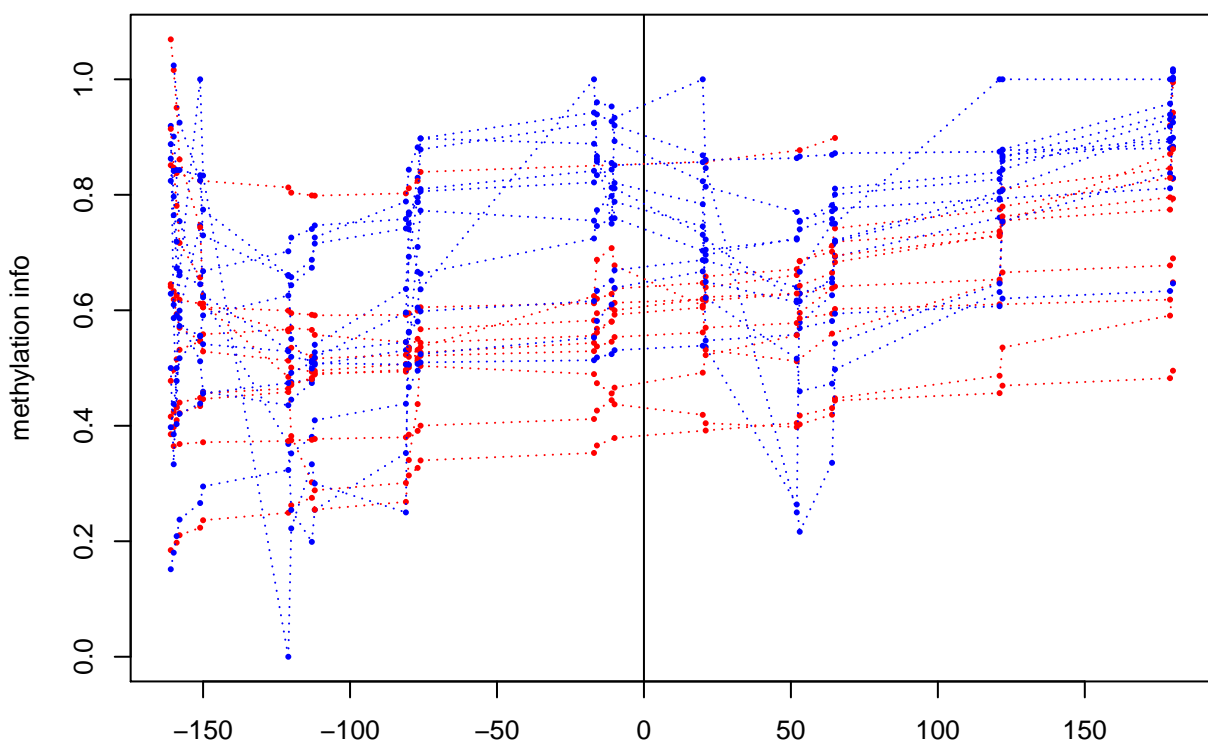

RNAseq logFC(UC-N)= 1.23

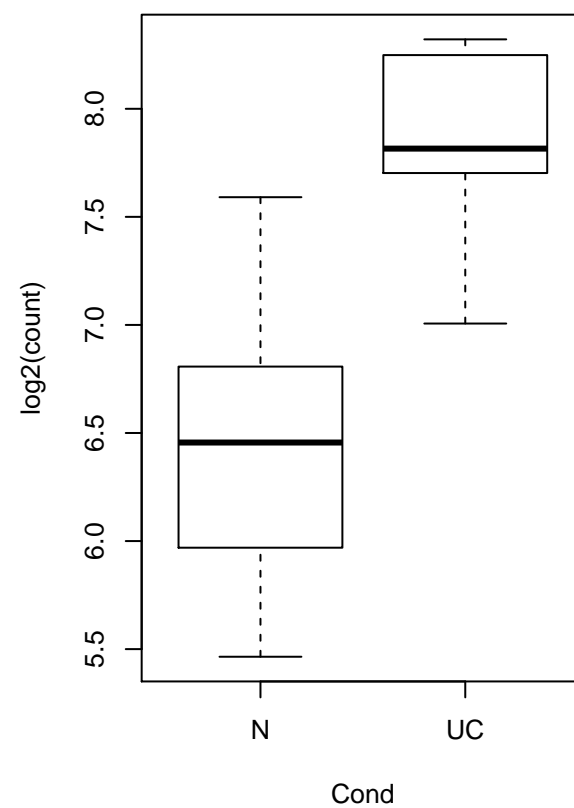

CD80 average UC-N %methylation max=-1.26% min=-26.5%

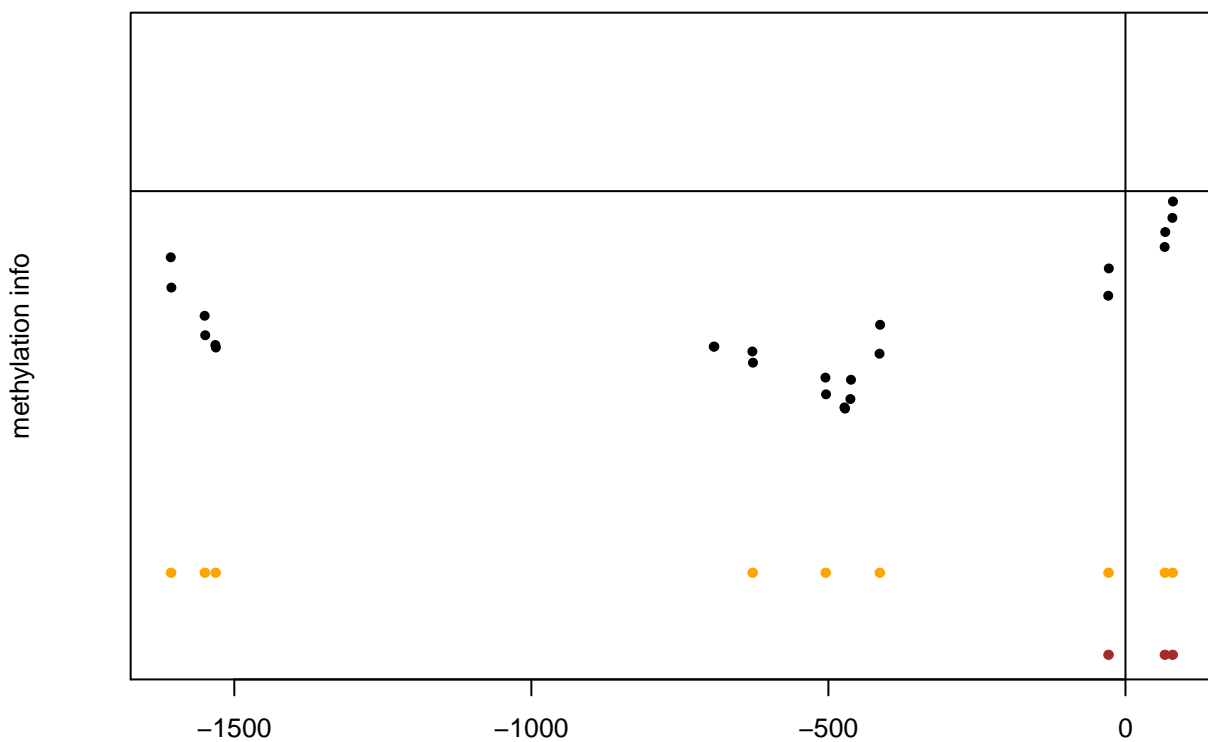

CD80 raw %methylation, red=UC, blue=Normal

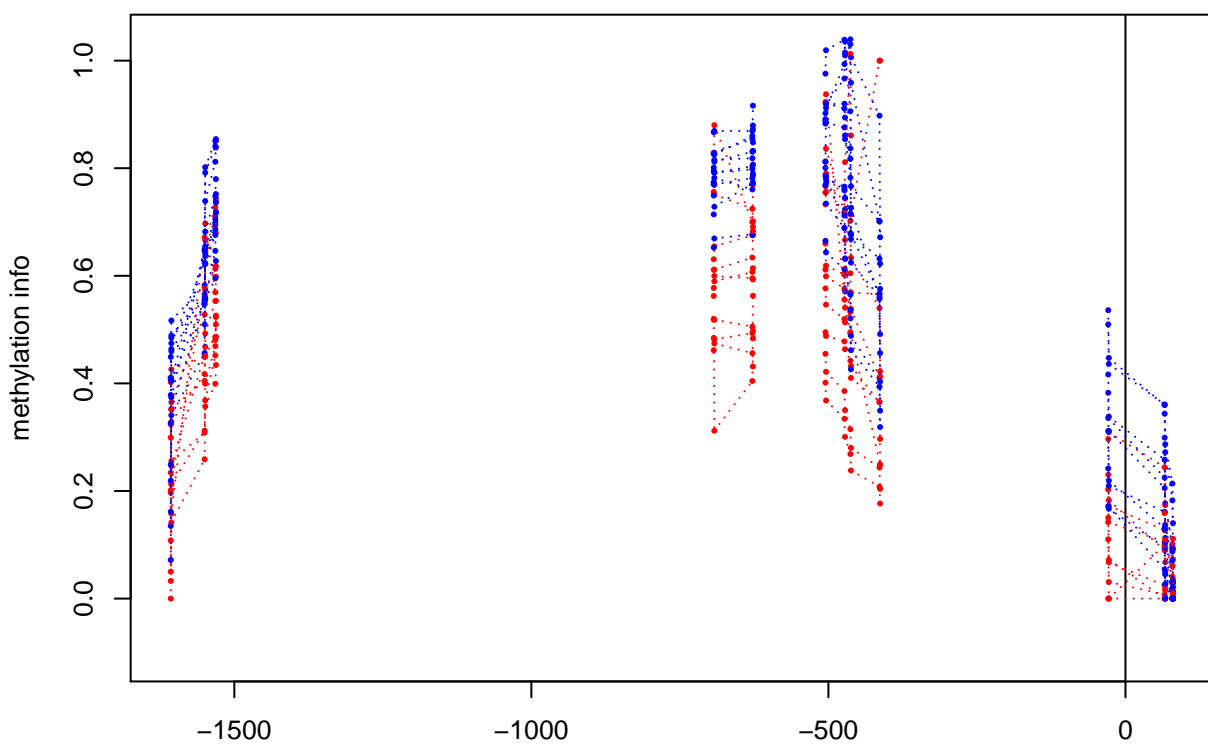

RNAseq logFC(UC-N)= 1.79

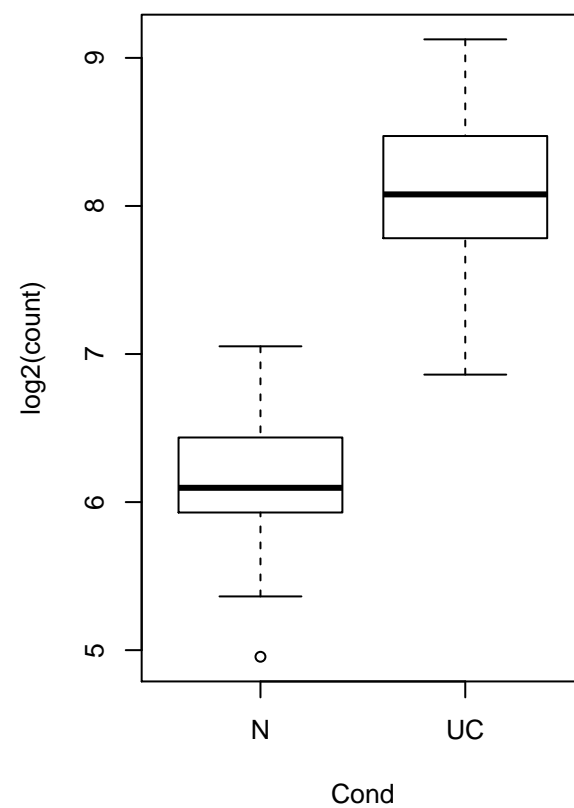

CDHR1 average UC-N %methylation max=13.65% min=-2.11%

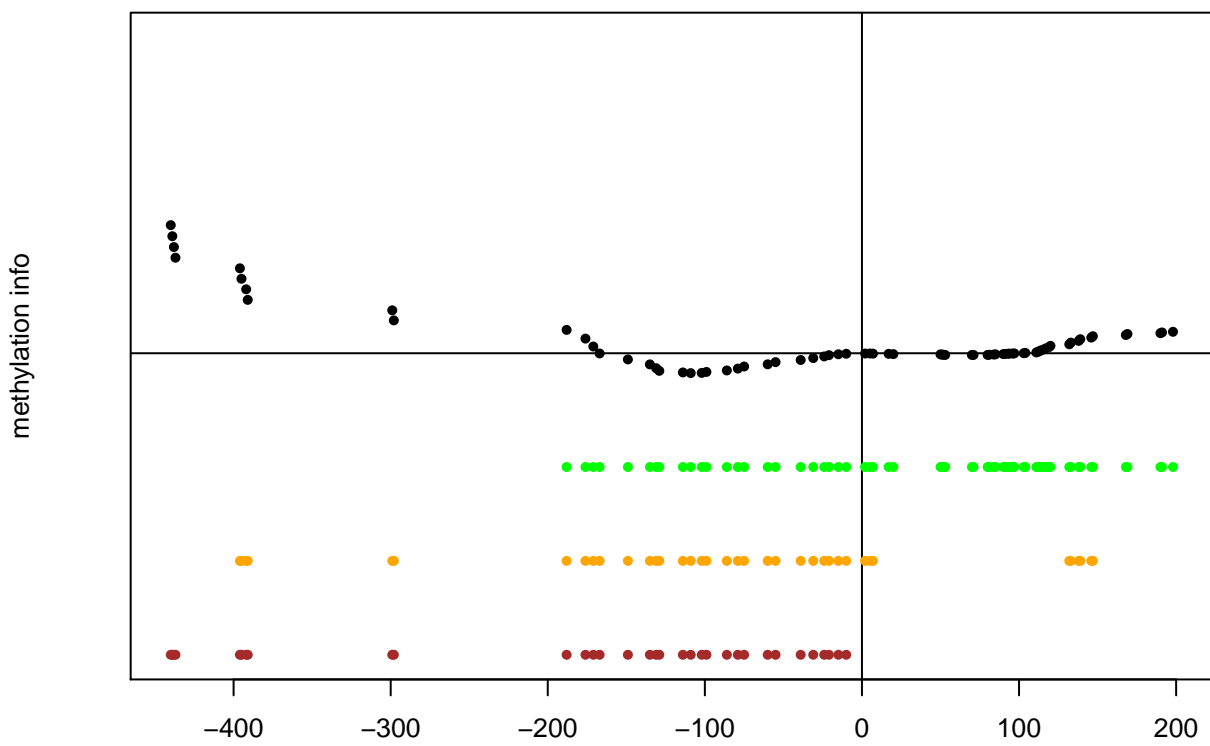

CDHR1 raw %methylation, red=UC, blue=Normal

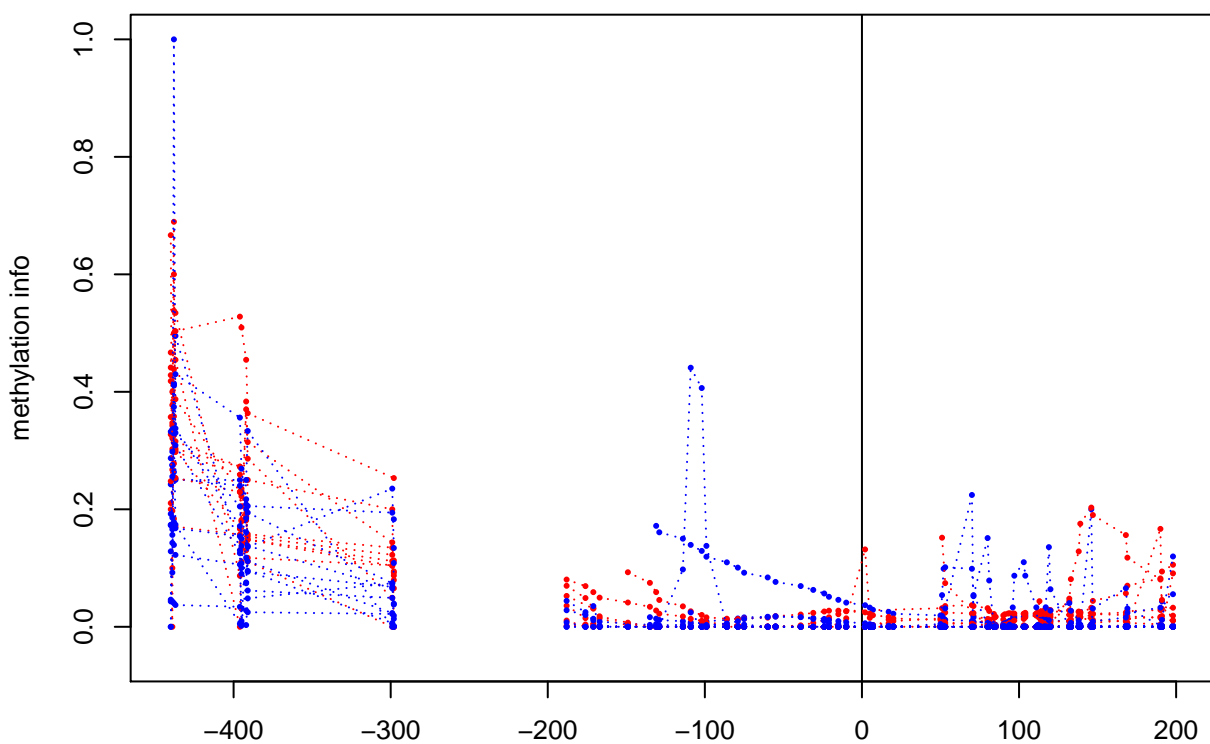

RNAseq logFC(UC-N)= -1.06

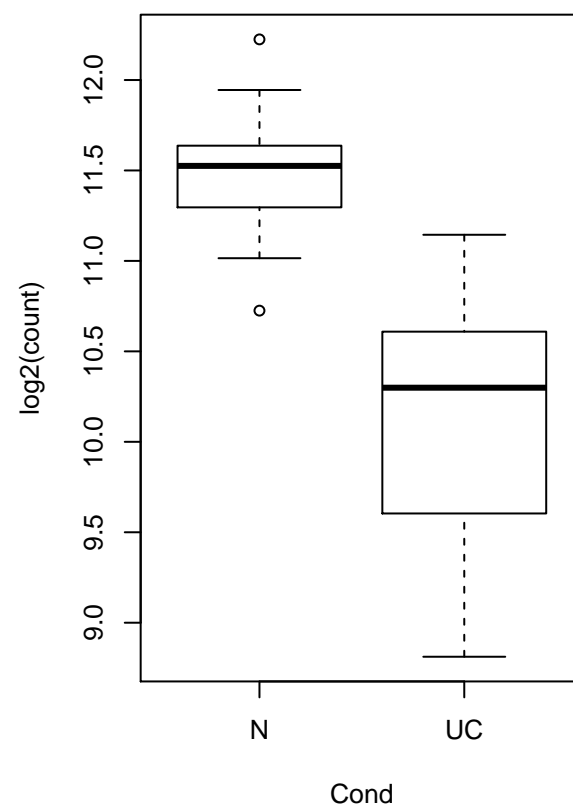

CELSR1 average UC-N %methylation max=17.03% min=-27.13%

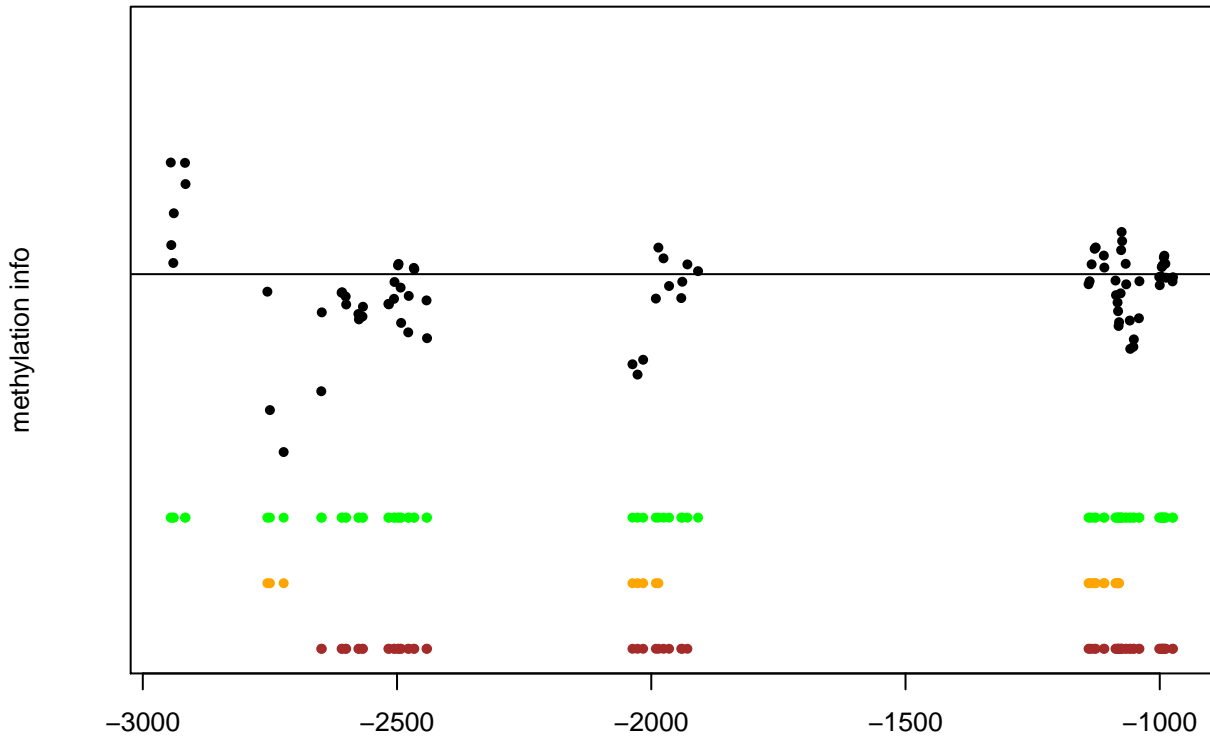

CELSR1 raw %methylation, red=UC, blue=Normal

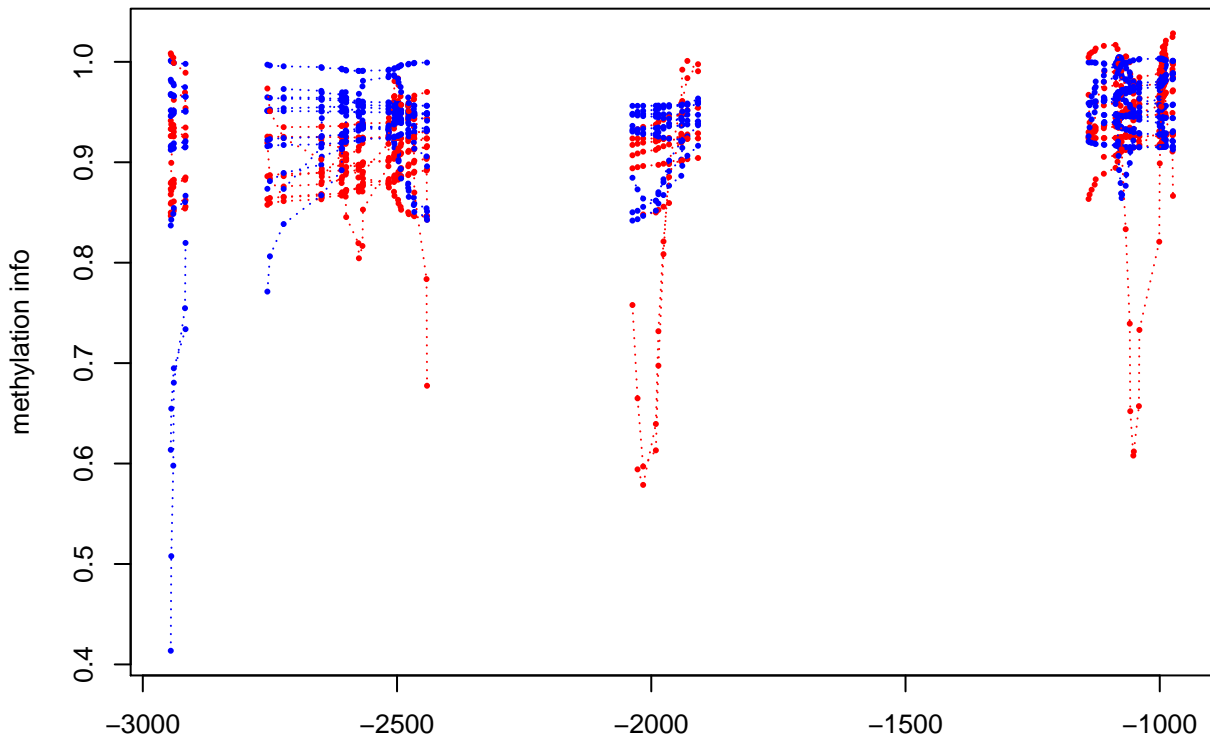

RNAseq logFC(UC-N)= 1.09

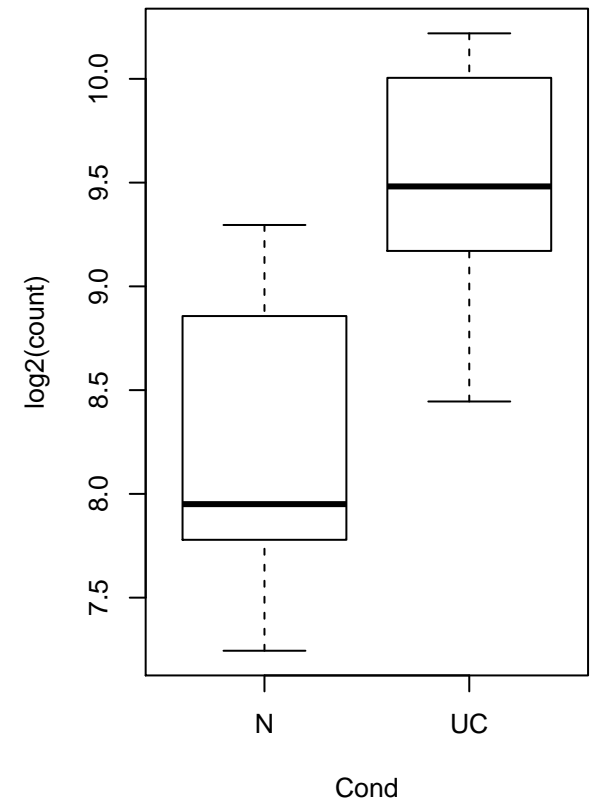

CETP average UC-N %methylation max=-0.31% min=-10.42%

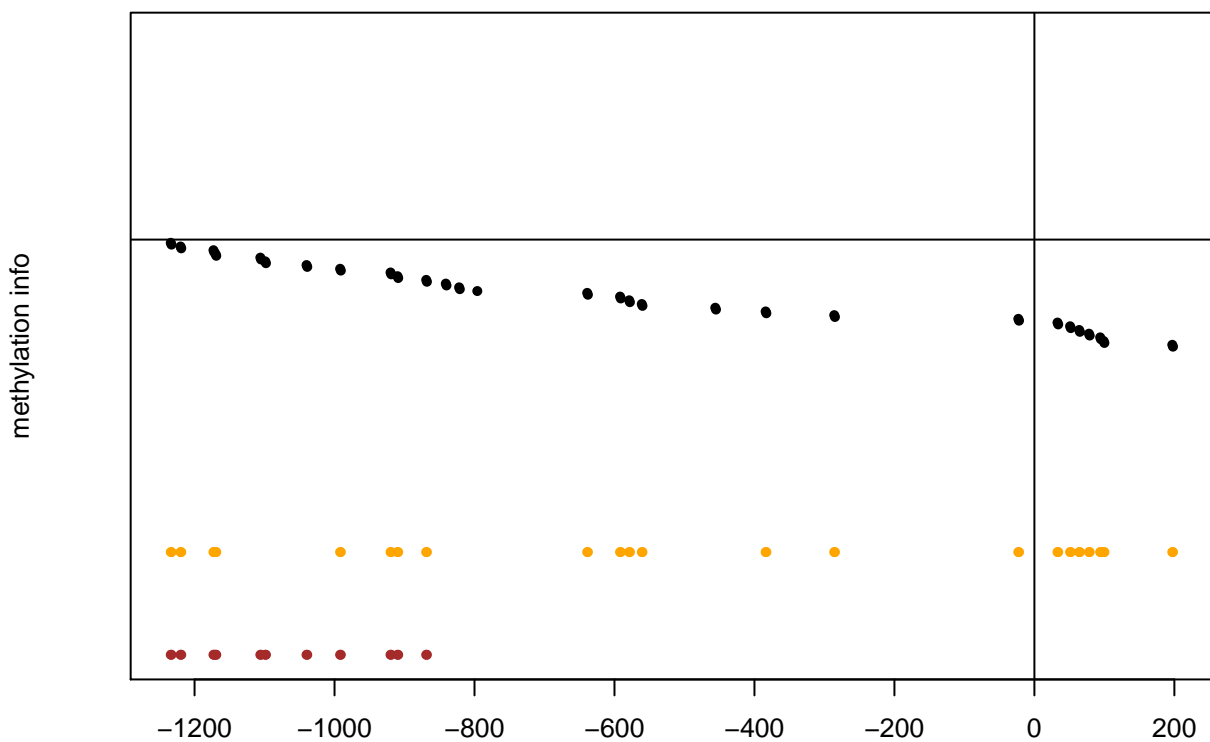

CETP raw %methylation, red=UC, blue=Normal

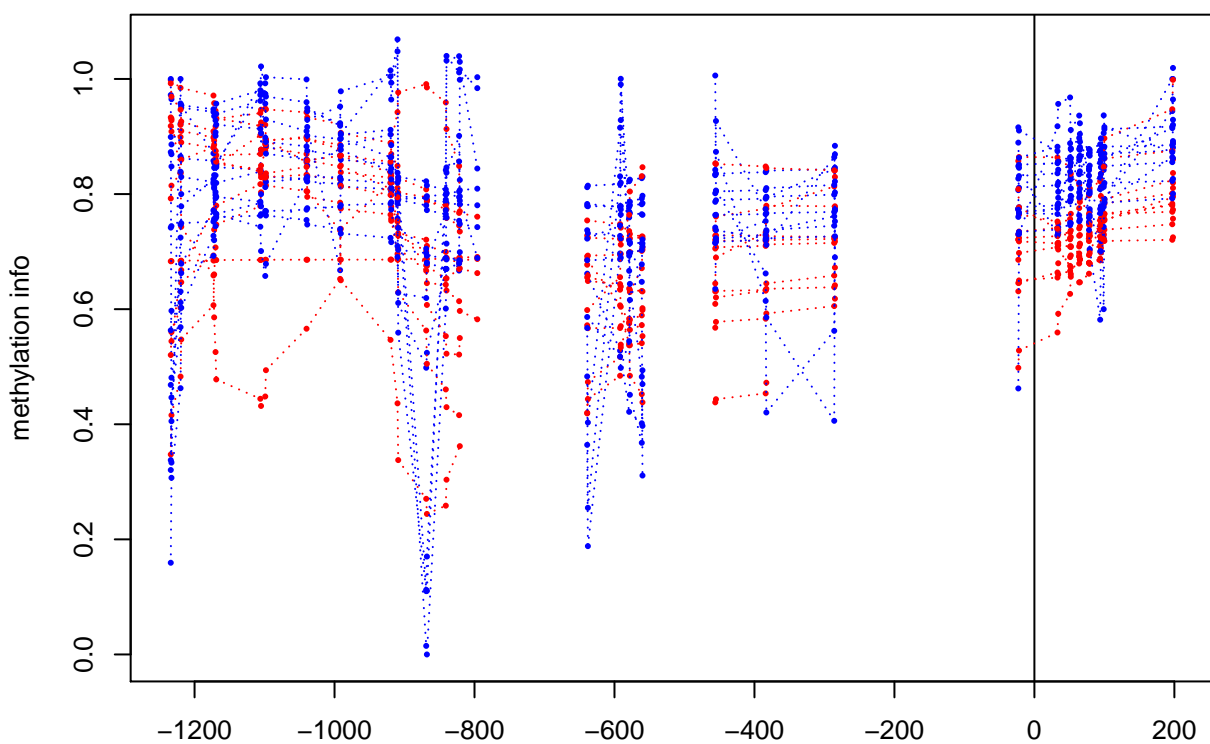

RNAseq logFC(UC-N)= 2.06

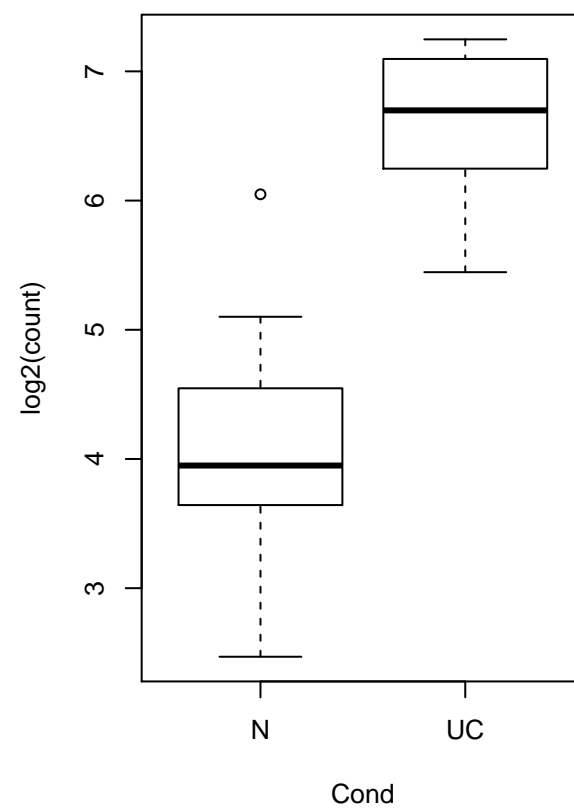

CFP average UC-N %methylation max=-26.69% min=-29.74%

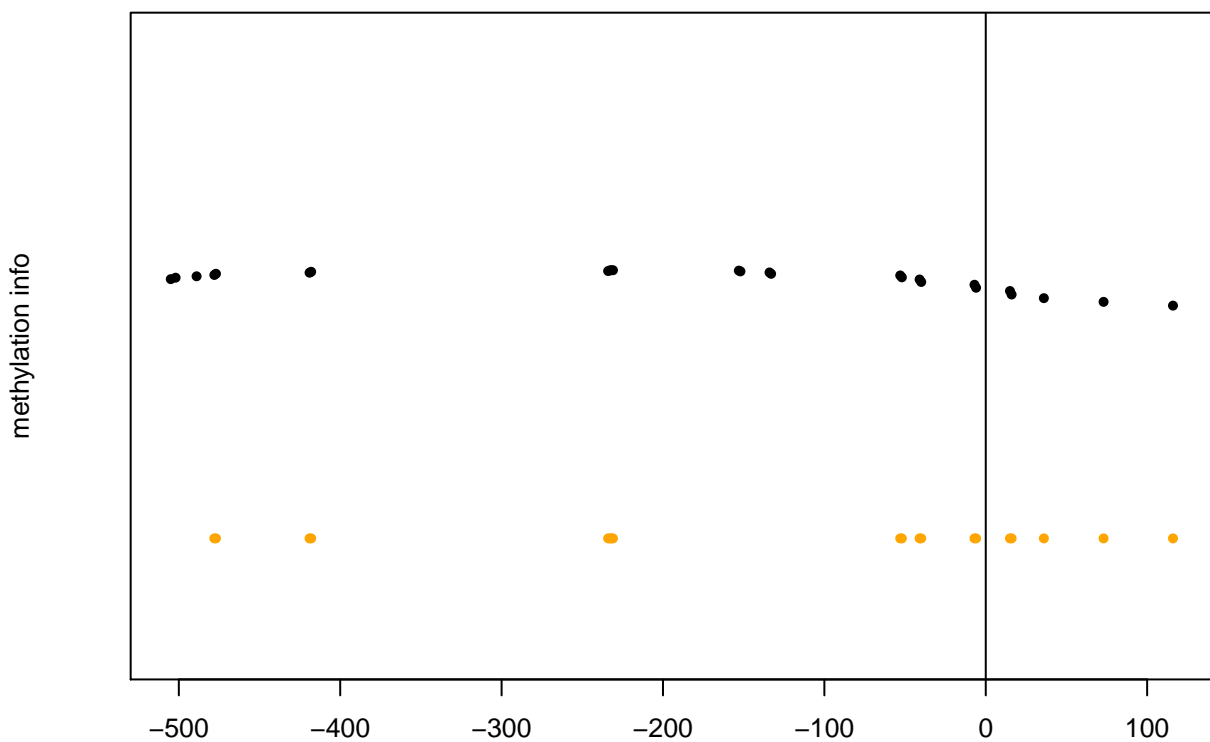

CFP raw %methylation, red=UC, blue=Normal

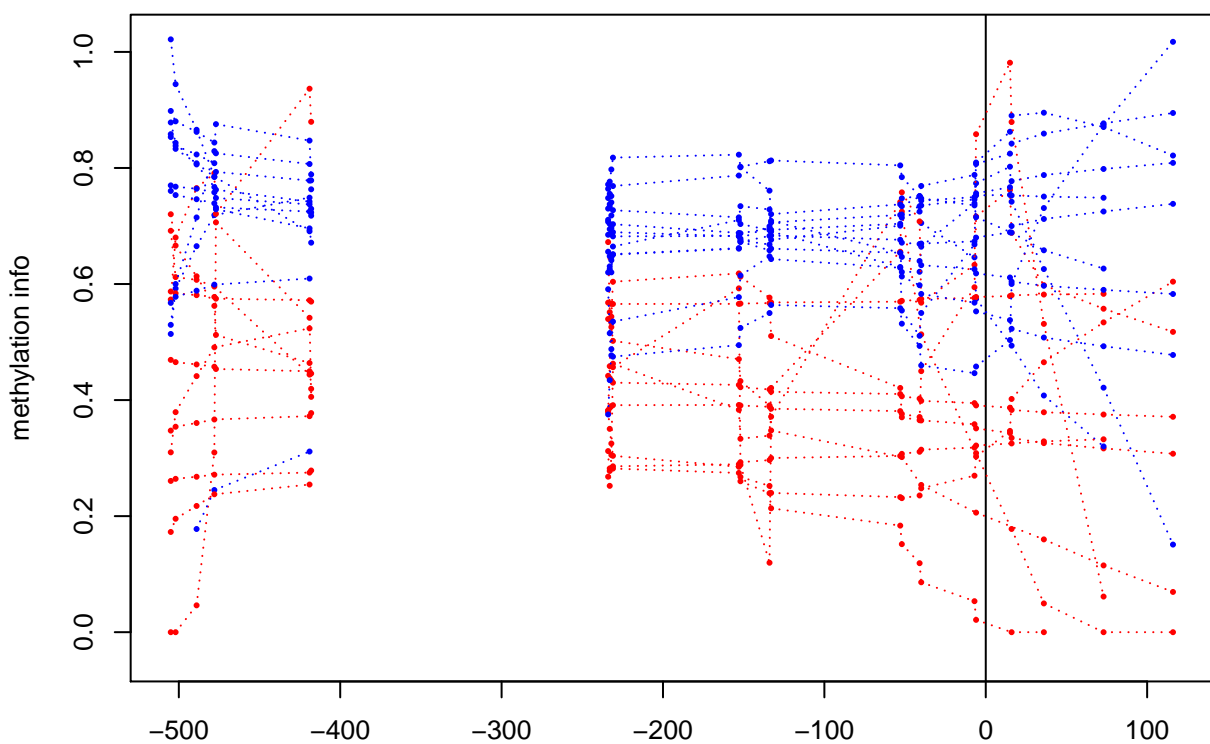

RNAseq logFC(UC-N)= 1.82

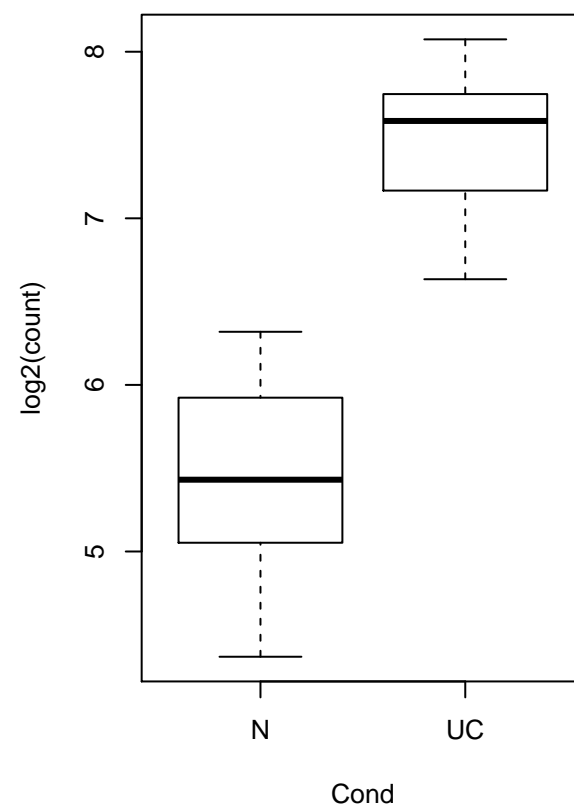



CHI3L2 average UC-N %methylation max=1.3% min=-28.66%

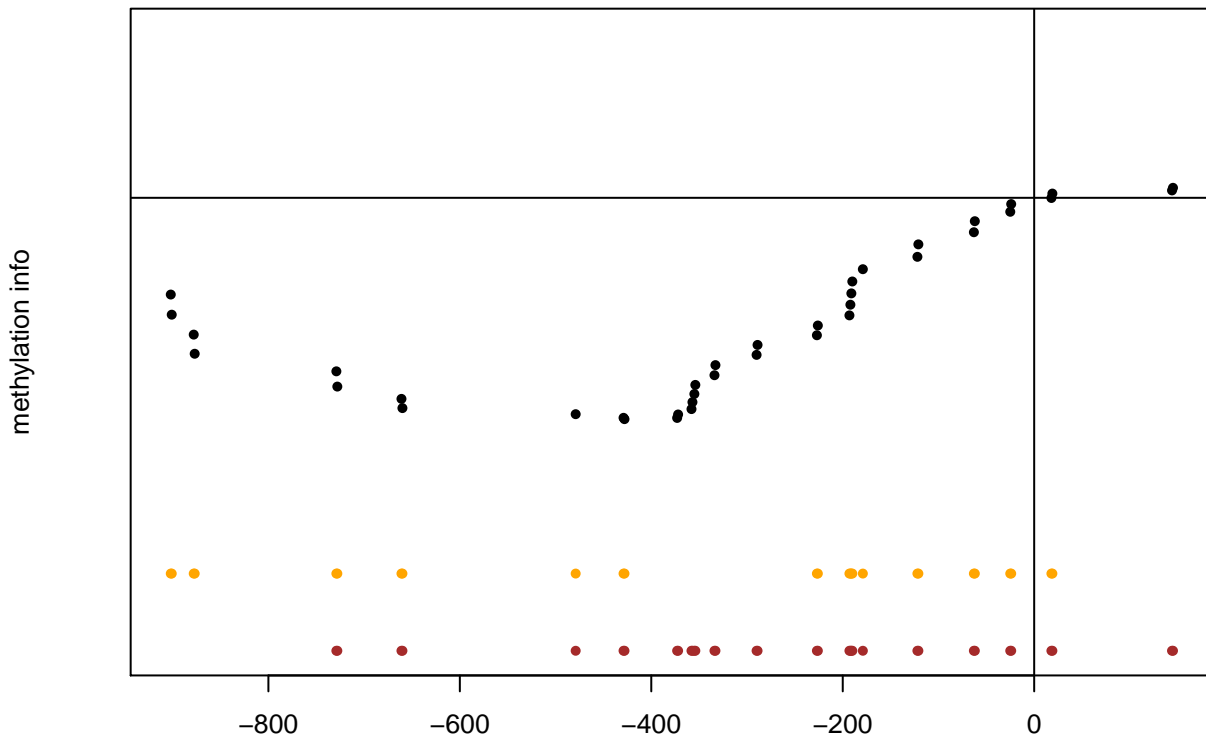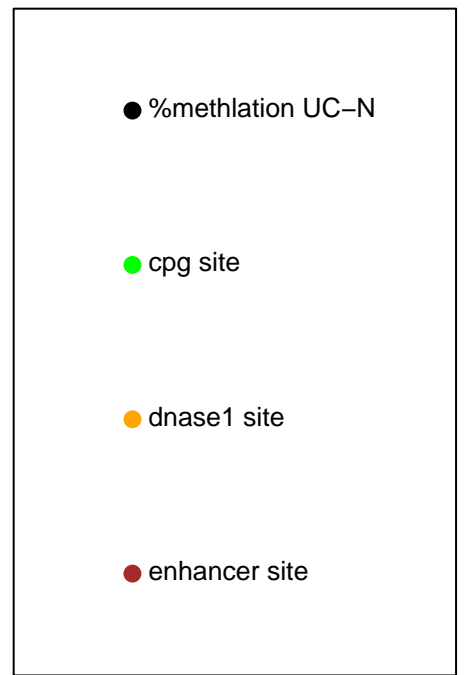

CHI3L2 raw %methylation, red=UC, blue=Normal

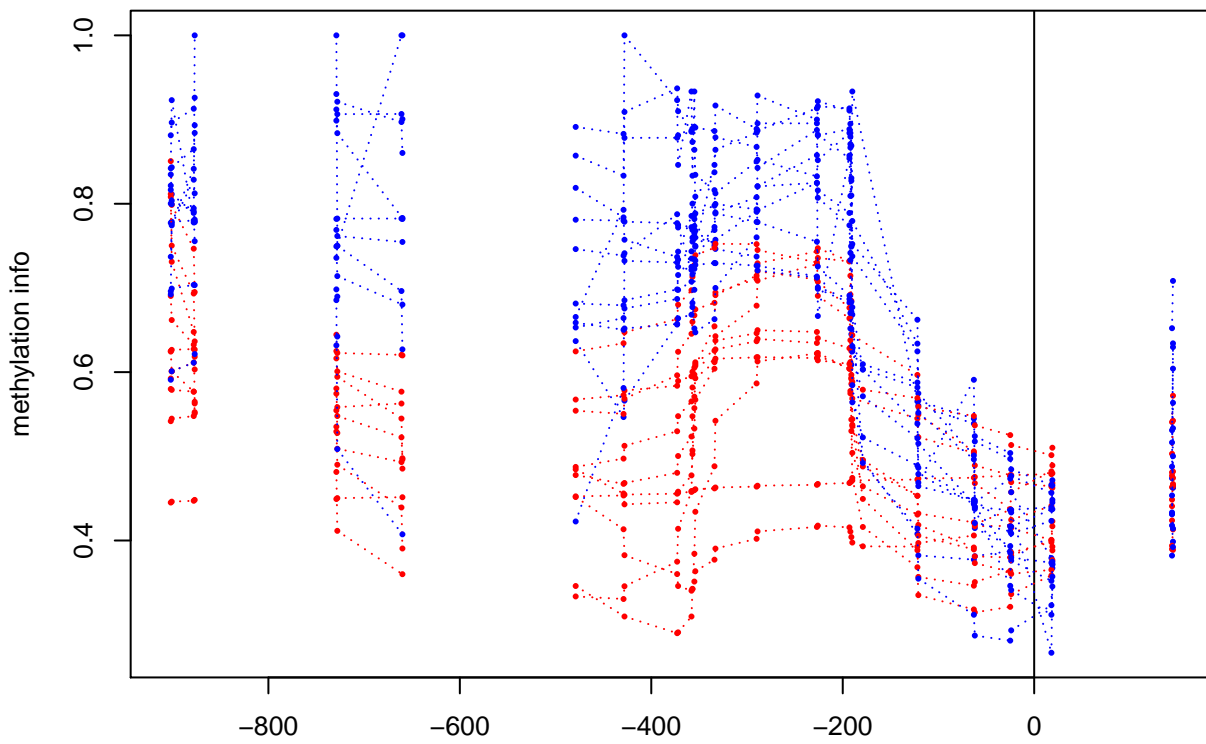

RNAseq logFC(UC-N)= 3.32

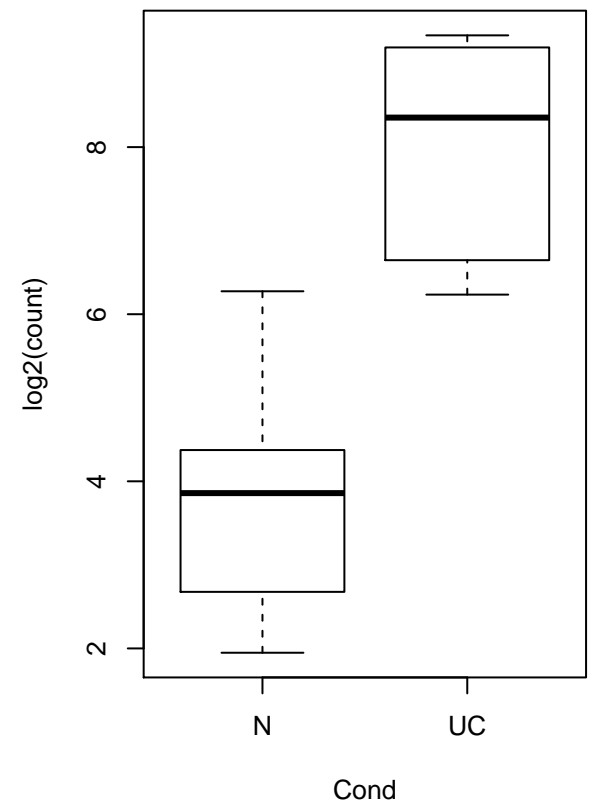

CHRD2 average UC-N %methylation max=6.76% min=-15.48%

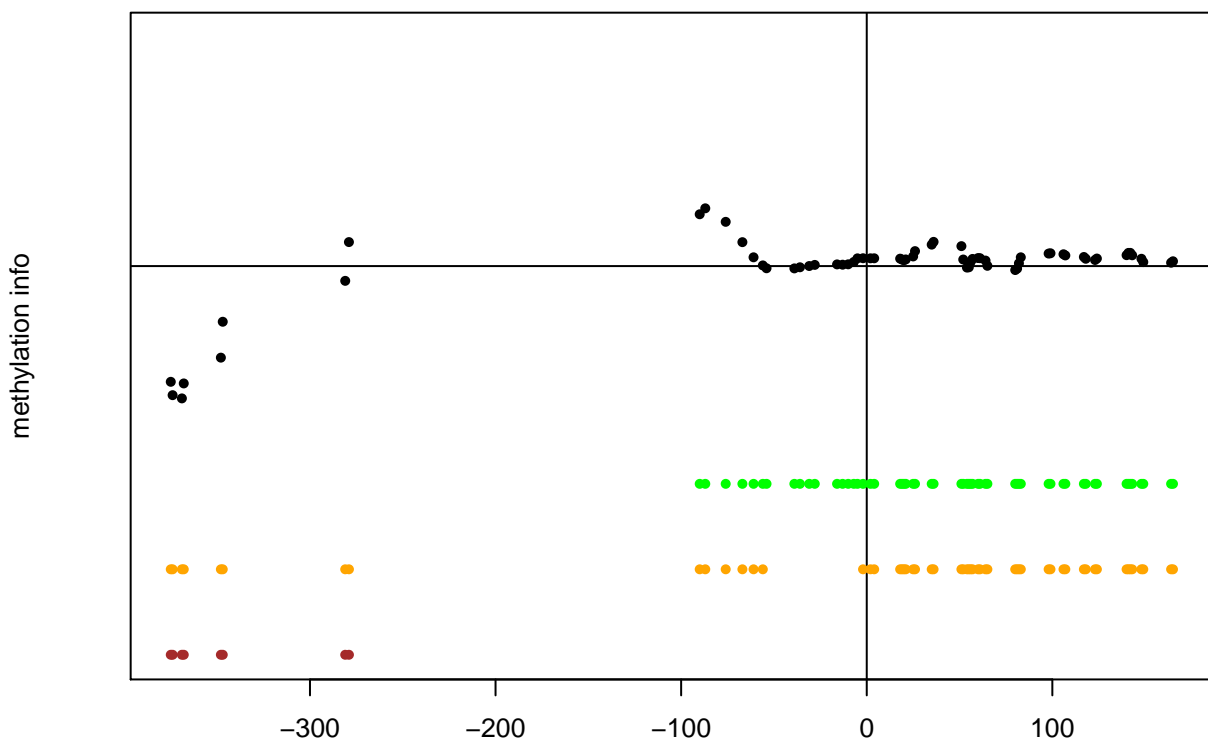

CHRD2 raw %methylation, red=UC, blue=Normal

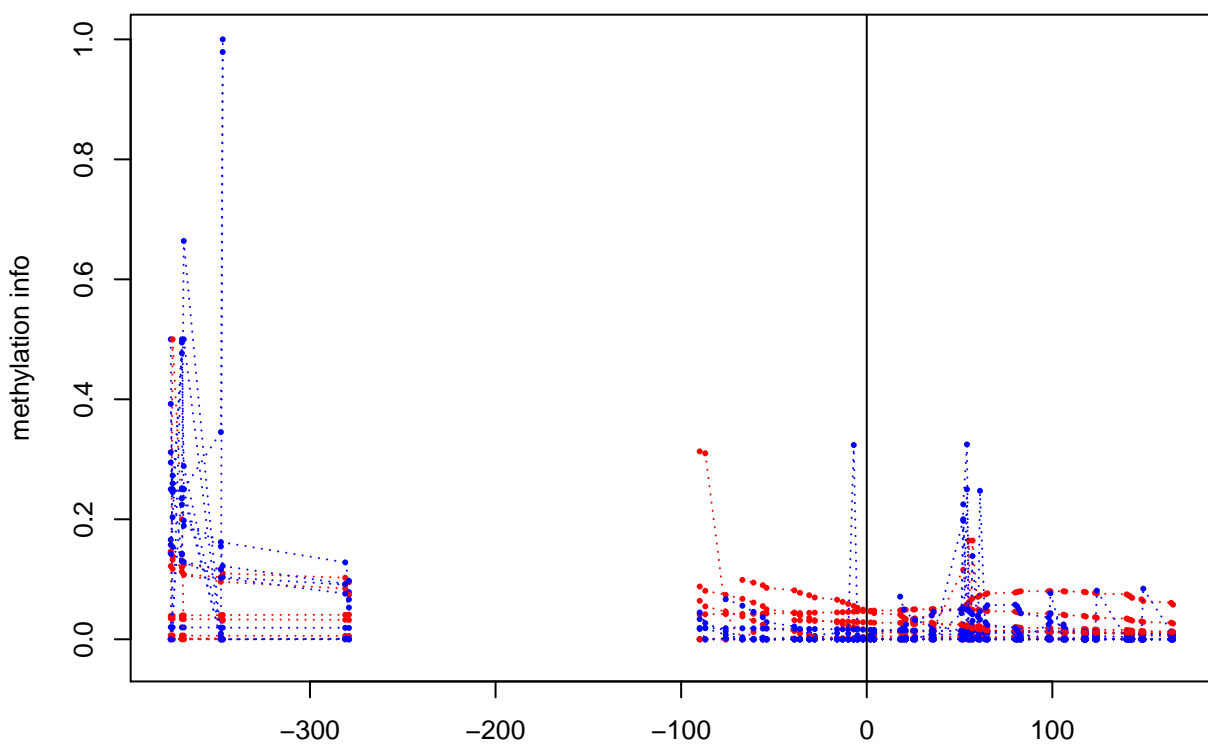

RNAseq logFC(UC-N)= 3.34

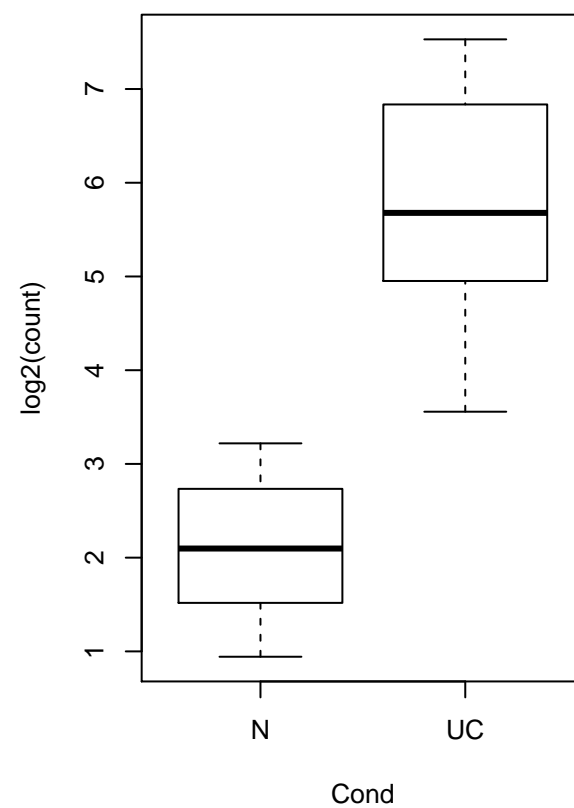

CHST11 average UC-N %methylation max=19.31% min=-16.51%

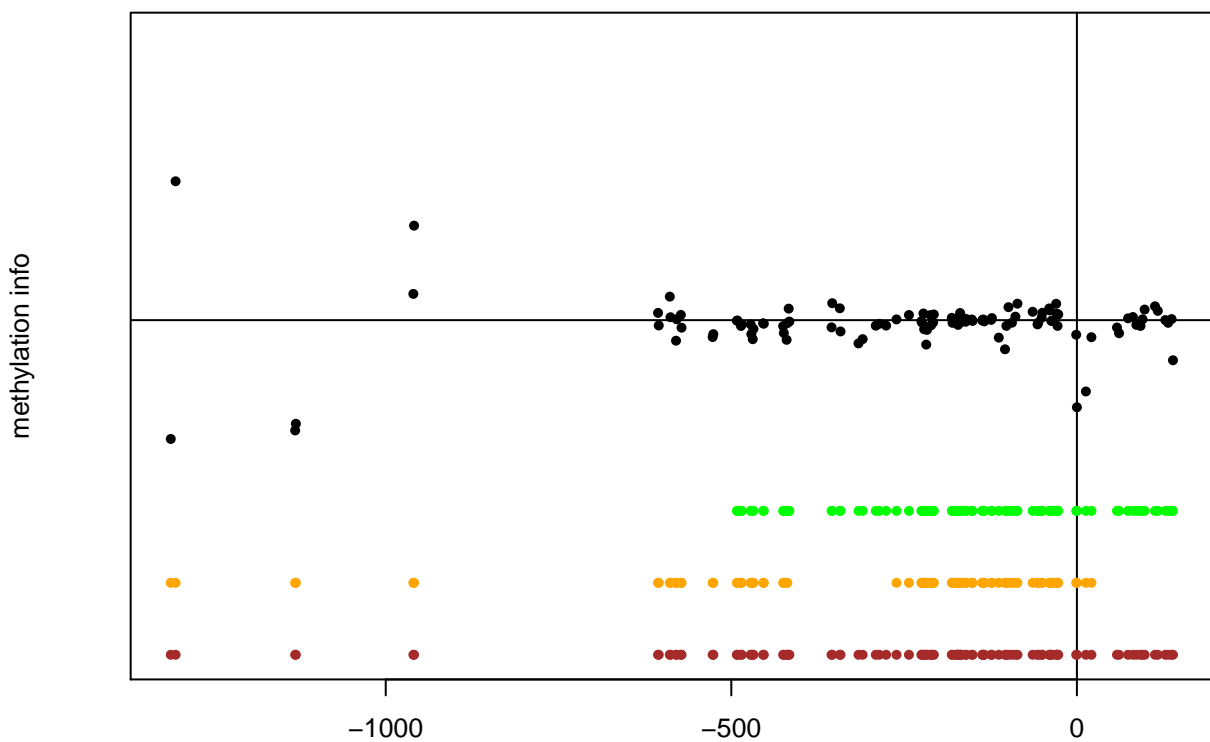

CHST11 raw %methylation, red=UC, blue=Normal

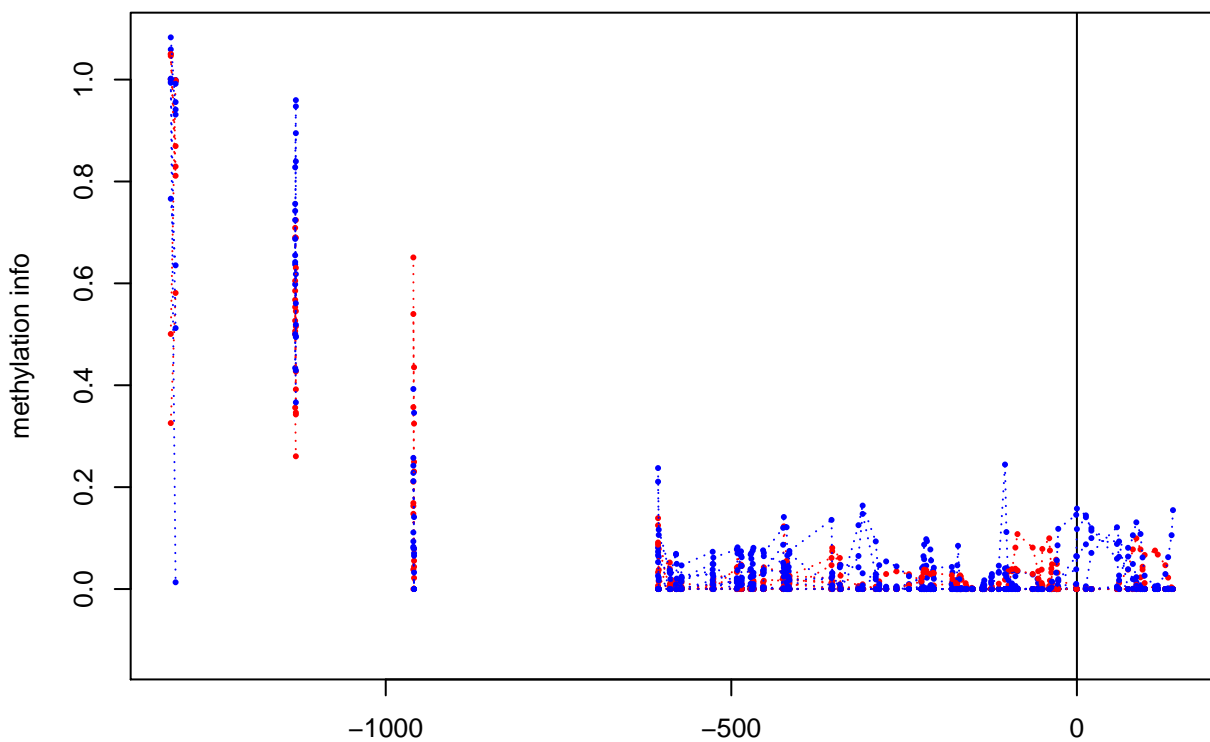

RNAseq logFC(UC-N)= 1.1

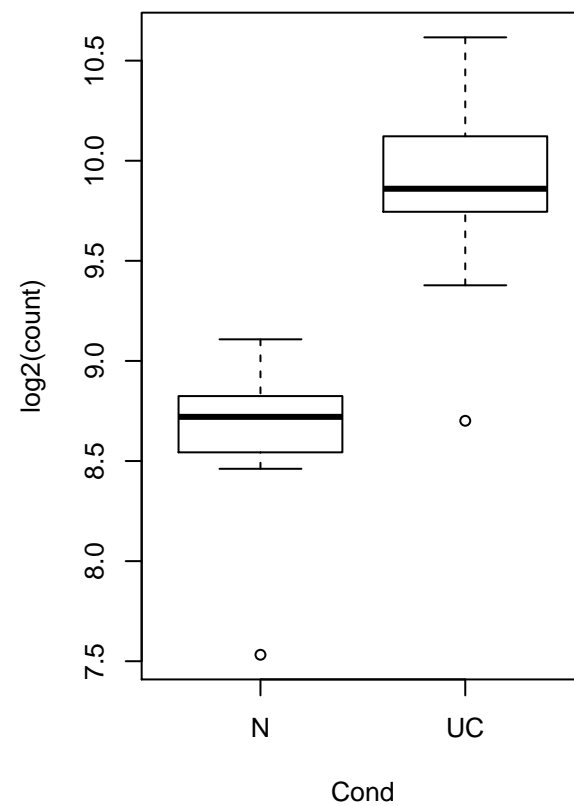

CHST2 average UC-N %methylation max=1.26% min=-21.33%

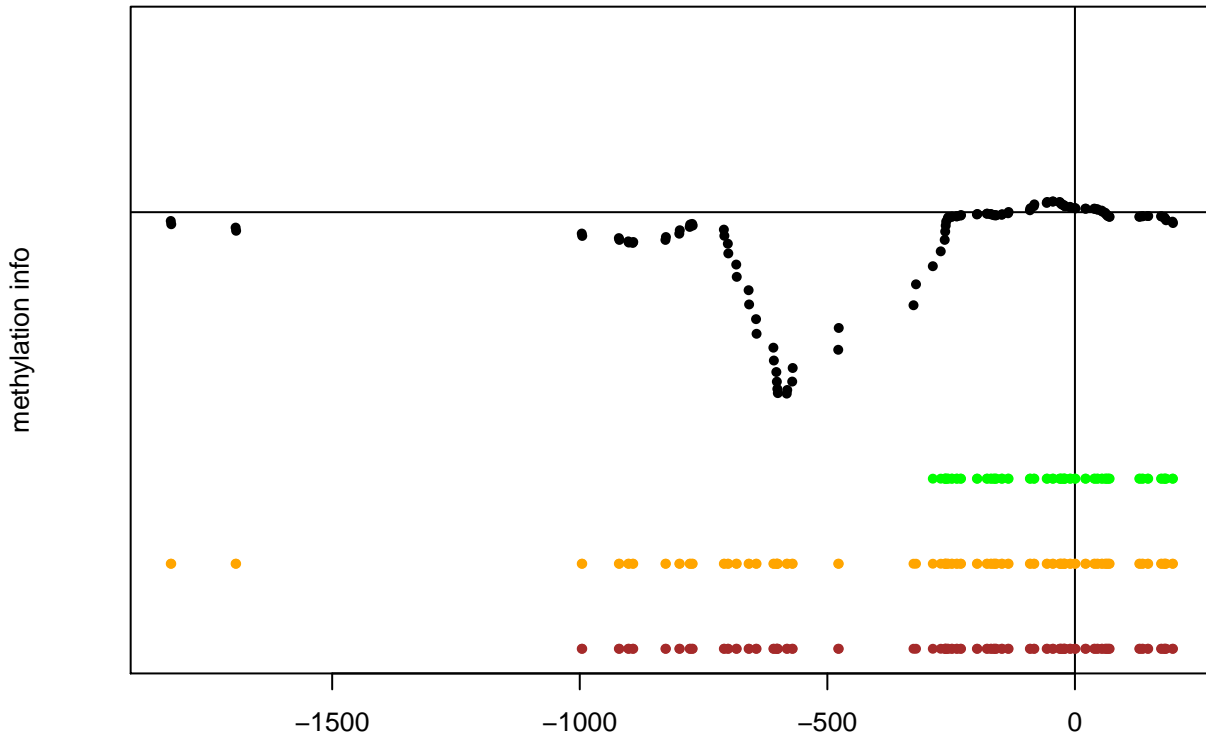

CHST2 raw %methylation, red=UC, blue=Normal

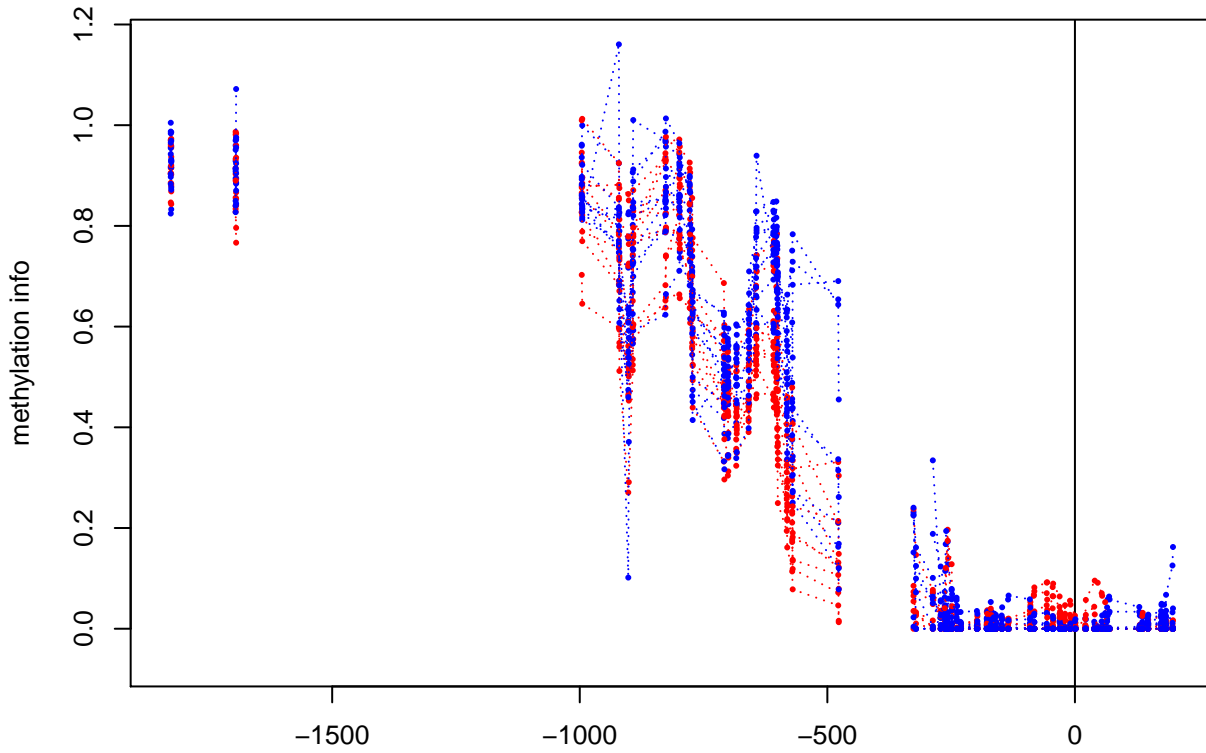

RNAseq logFC(UC-N)= 2.04

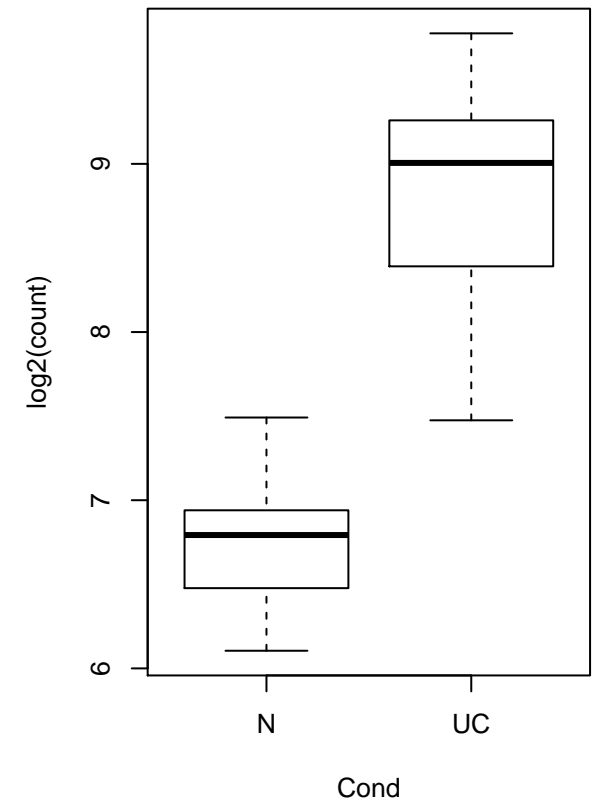

CIITA average UC-N %methylation max=-31.3% min=-33.31%

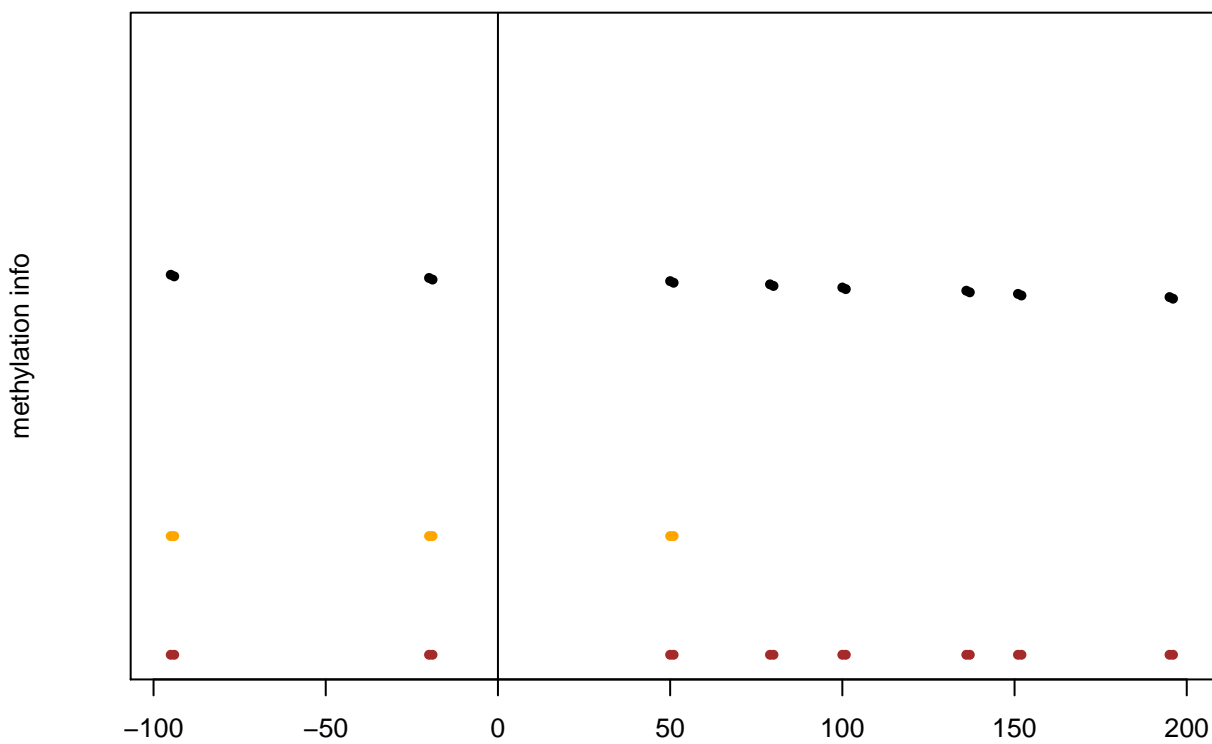

CIITA raw %methylation, red=UC, blue=Normal

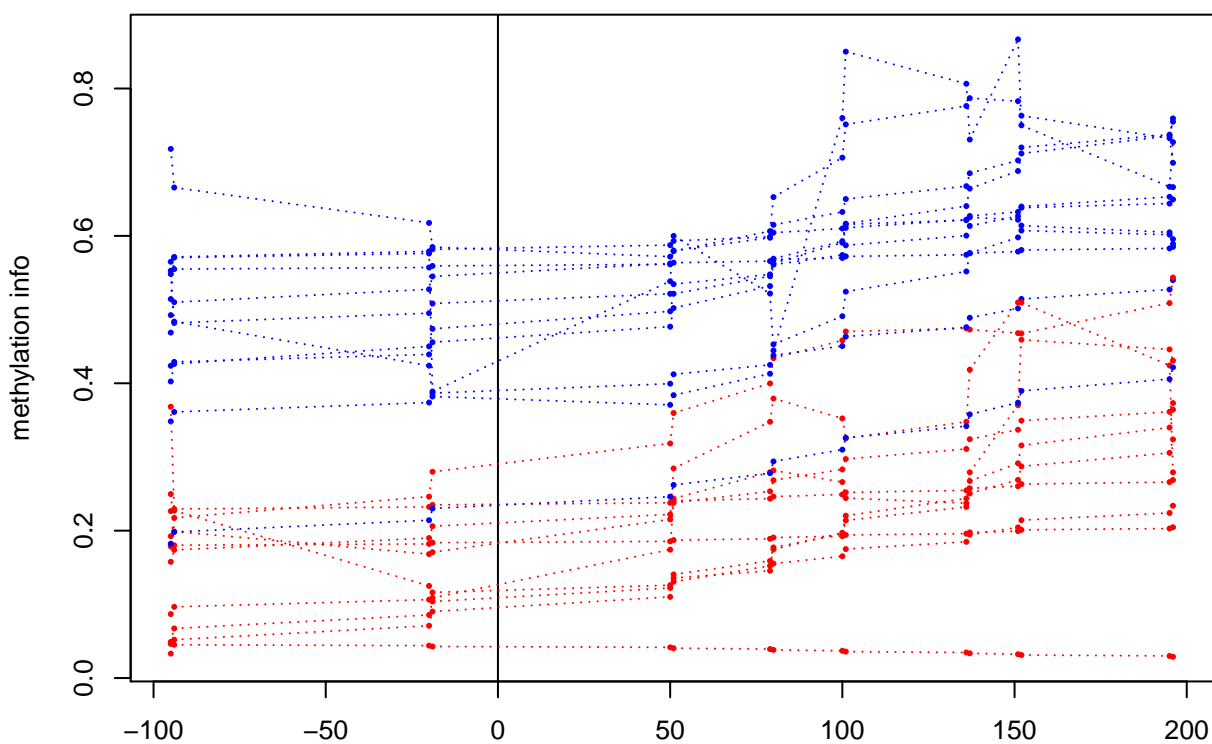

RNAseq logFC(UC-N)= 1.81

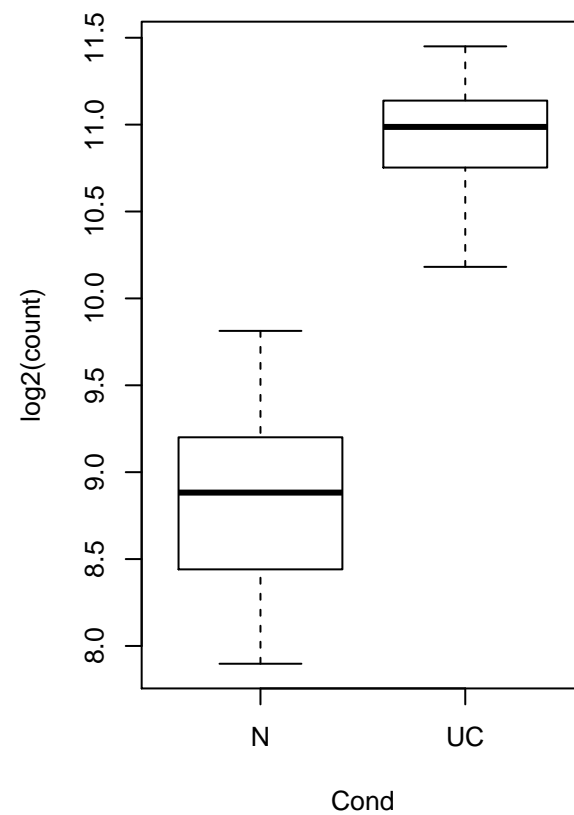

CLDN8 average UC-N %methylation max=9.44% min=-12.41%

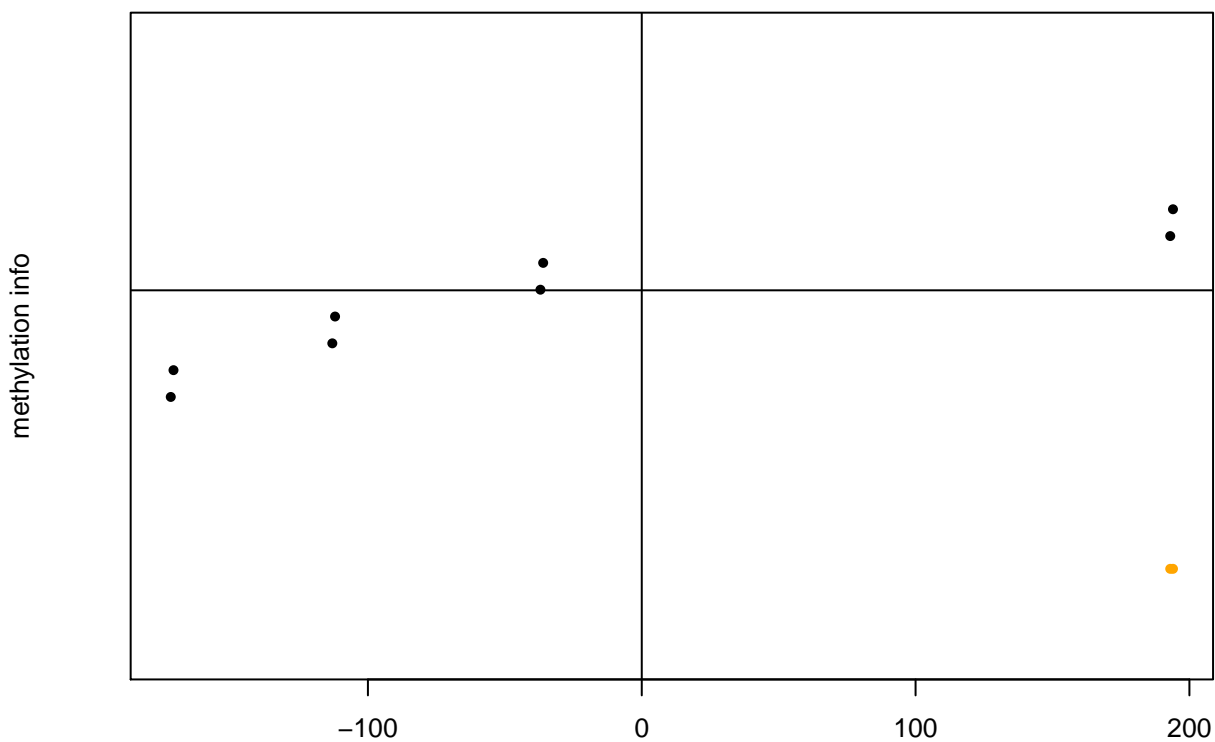

CLDN8 raw %methylation, red=UC, blue=Normal

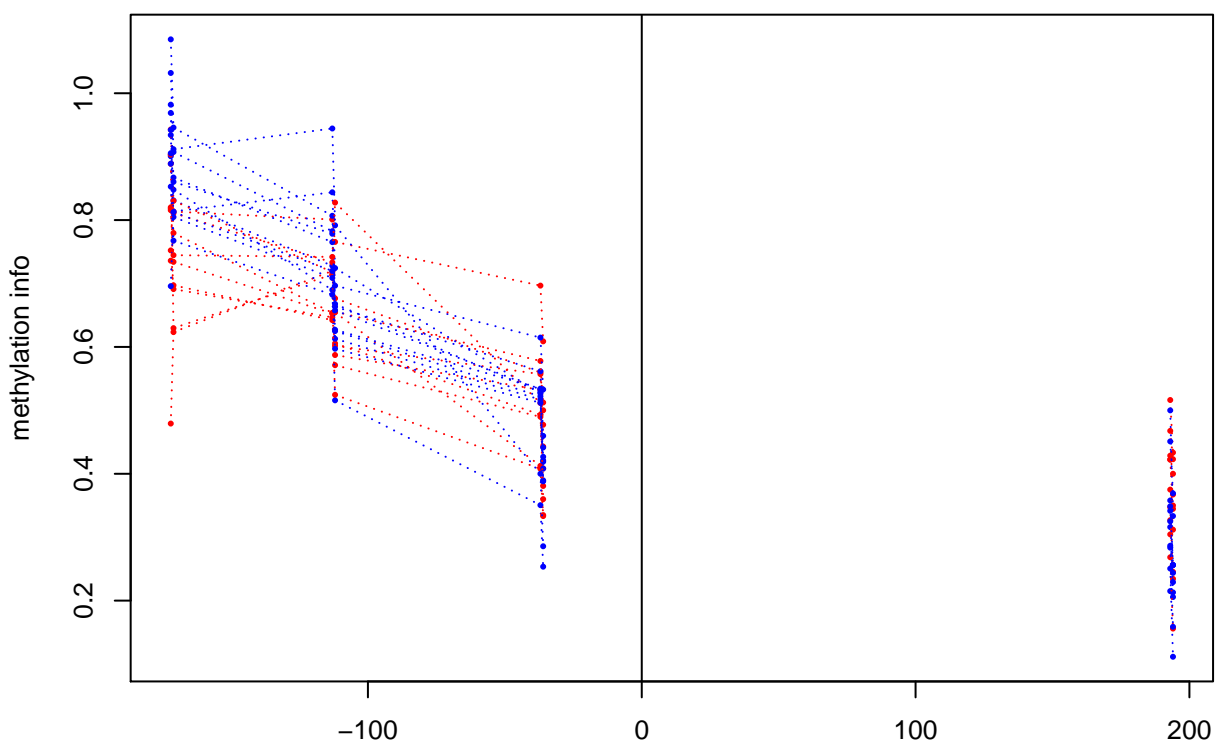

RNAseq logFC(UC-N)= -1.9

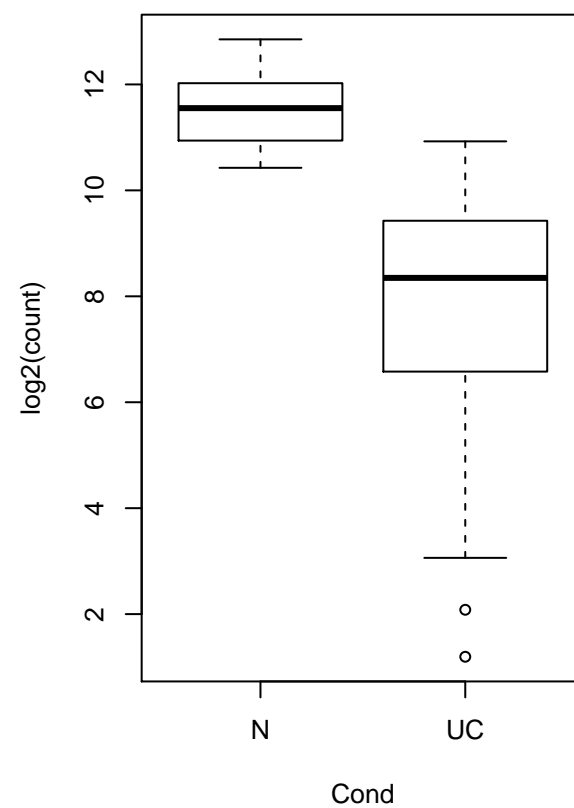

CLIC6 average UC-N %methylation max=-4.28% min=-34.57%

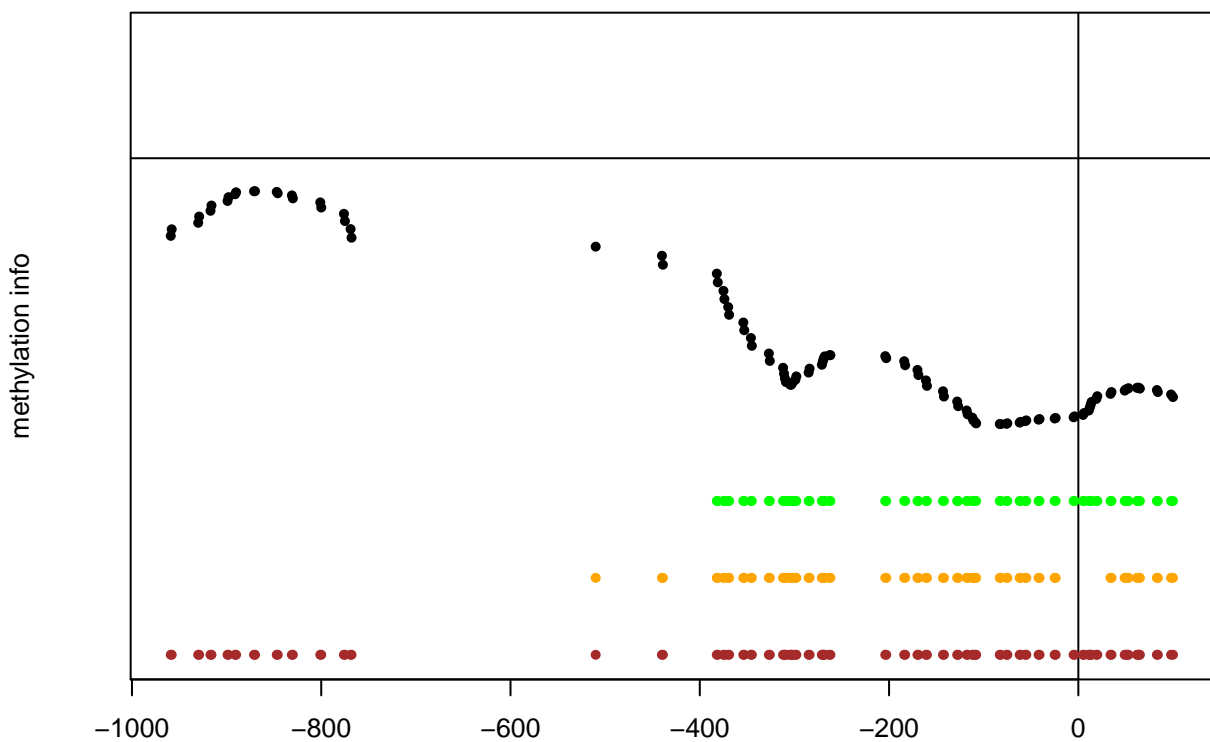

CLIC6 raw %methylation, red=UC, blue=Normal

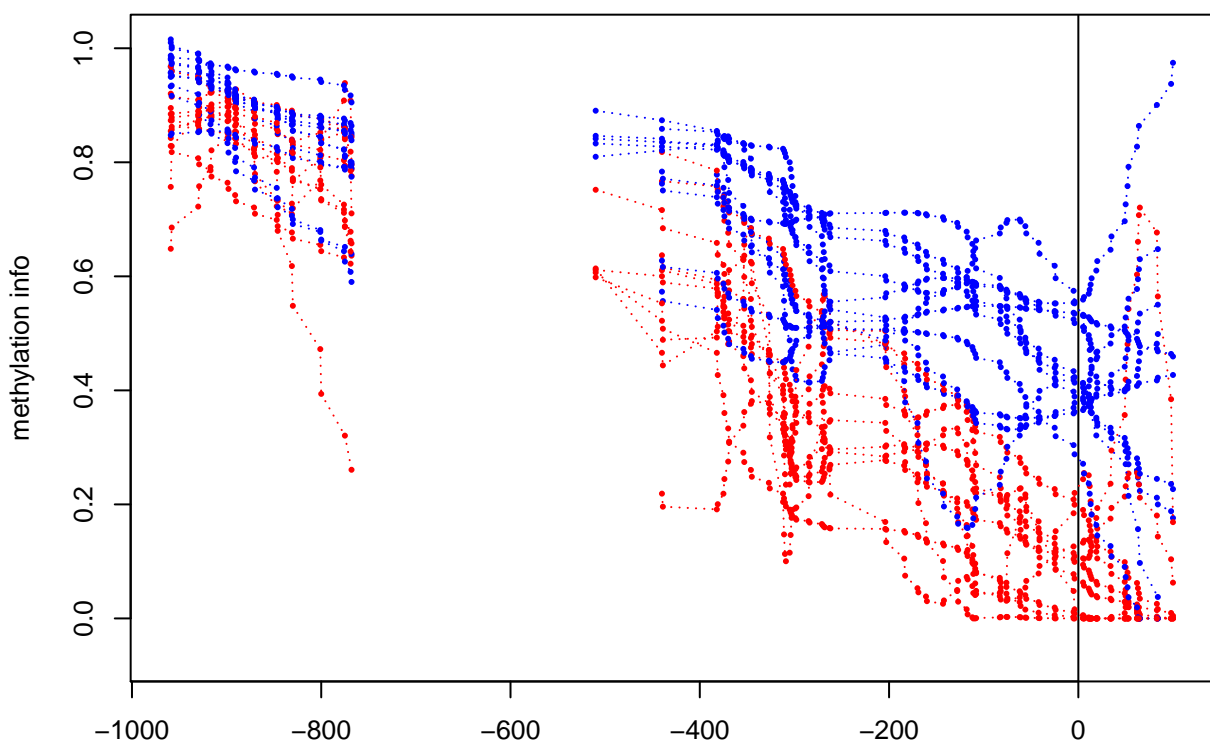

RNAseq logFC(UC-N)= 1.35

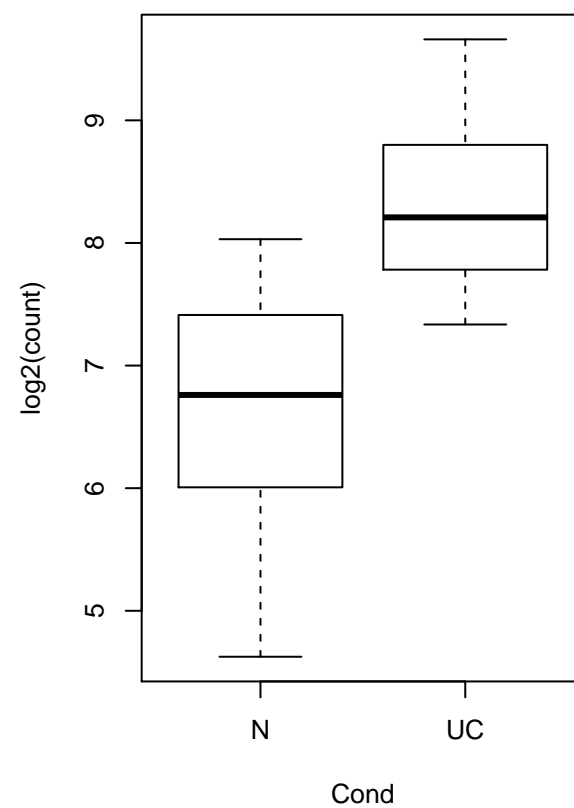

CNR2 average UC-N %methylation max=0.44% min=-16.45%

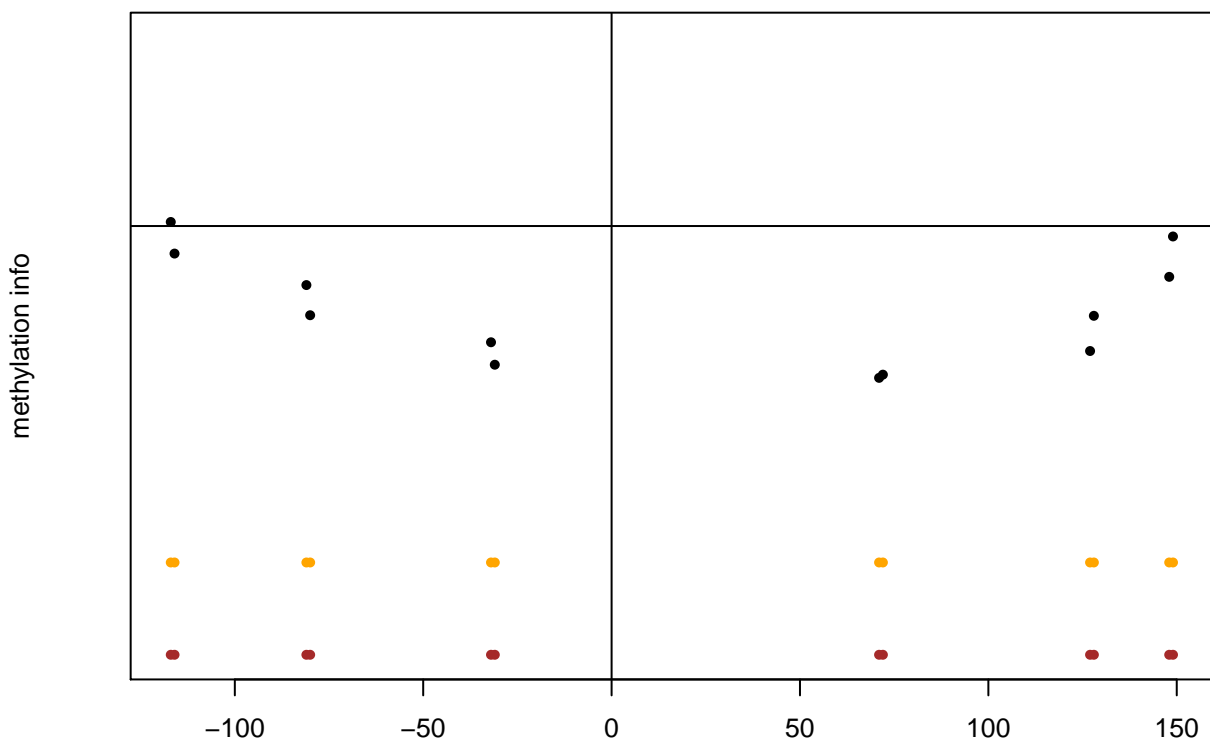

CNR2 raw %methylation, red=UC, blue=Normal

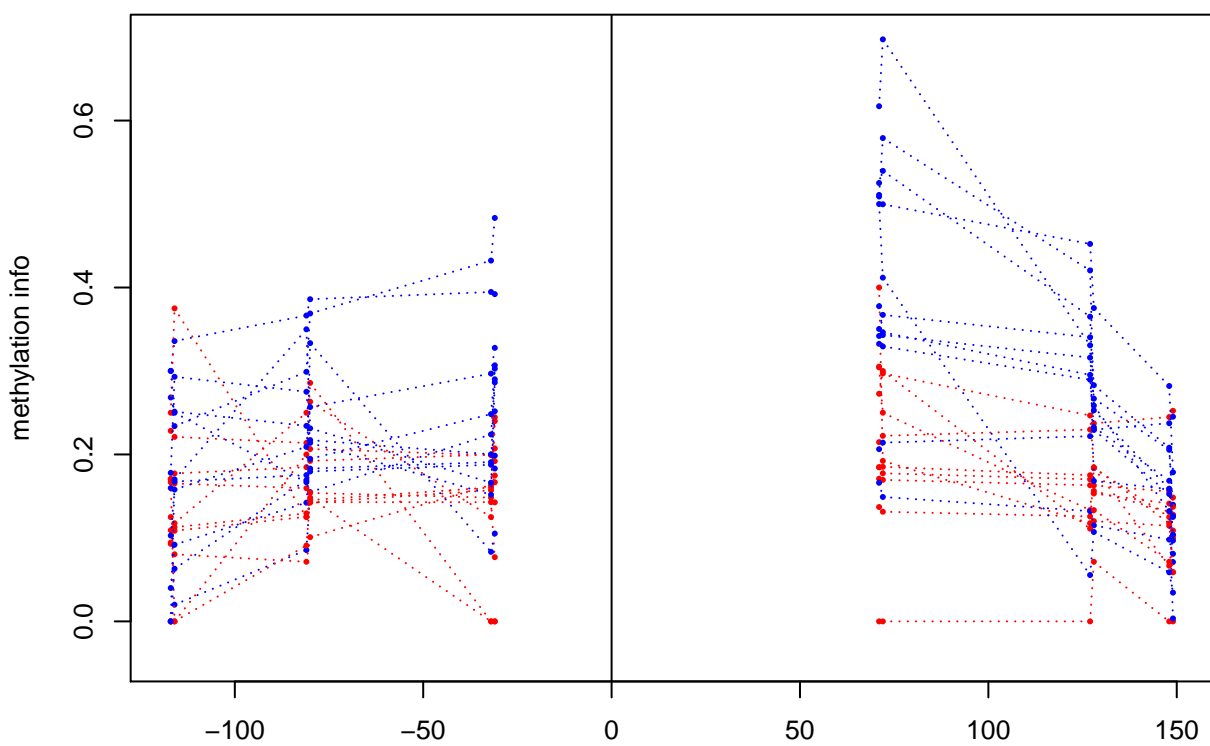

RNAseq logFC(UC-N)= 1.68

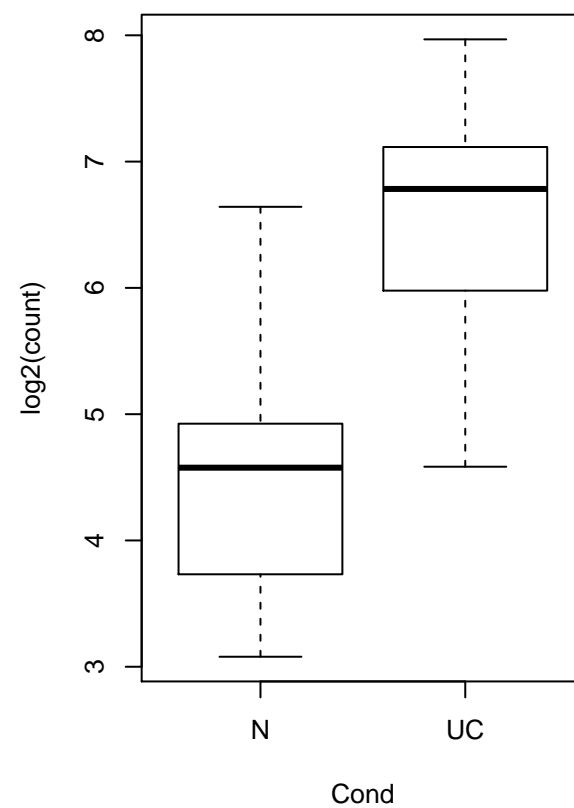



CPA6 average UC-N %methylation max=9.95% min=-4.83%

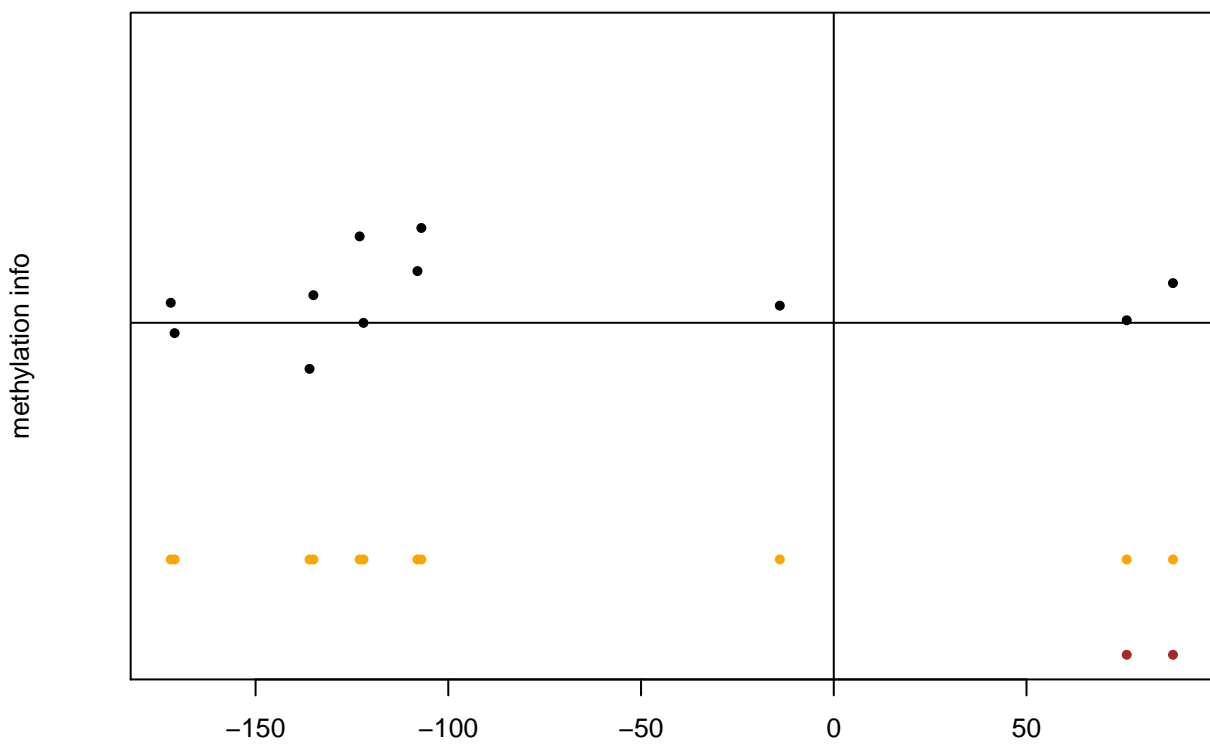

CPA6 raw %methylation, red=UC, blue=Normal

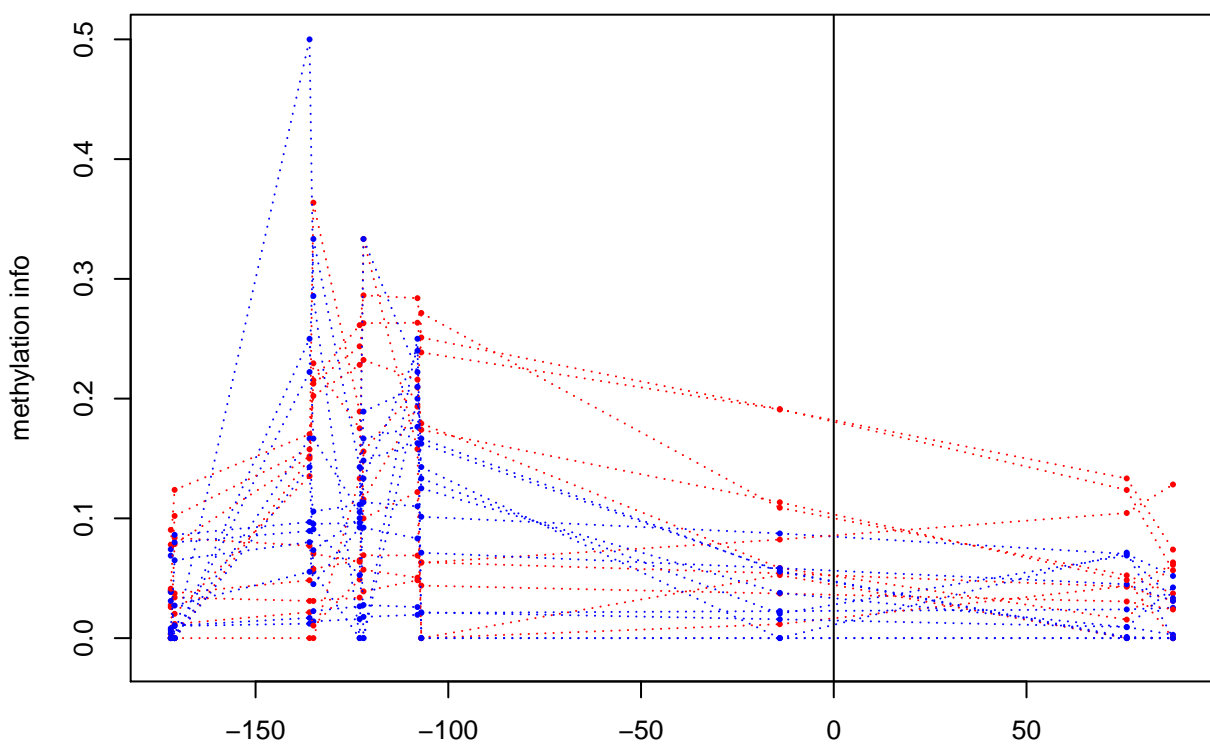

RNAseq logFC(UC-N)= -1.38

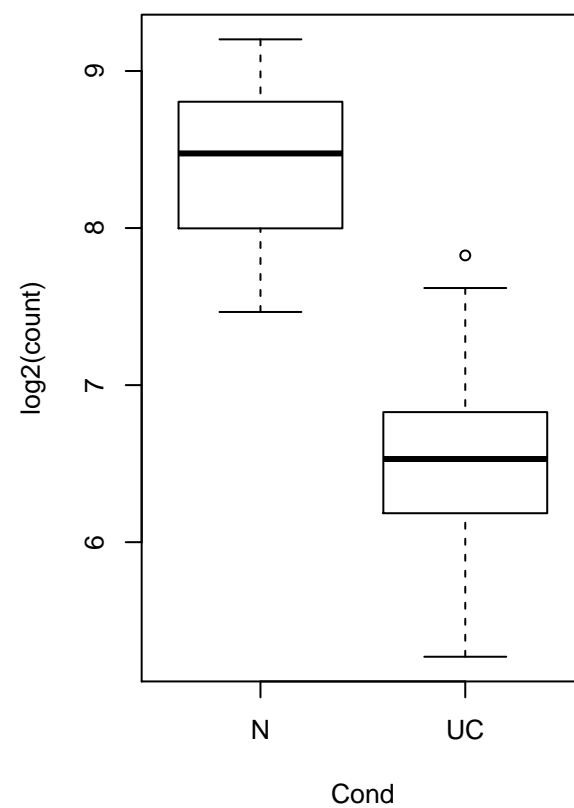

CR1 average UC-N %methylation max=0.09% min=-29.79%

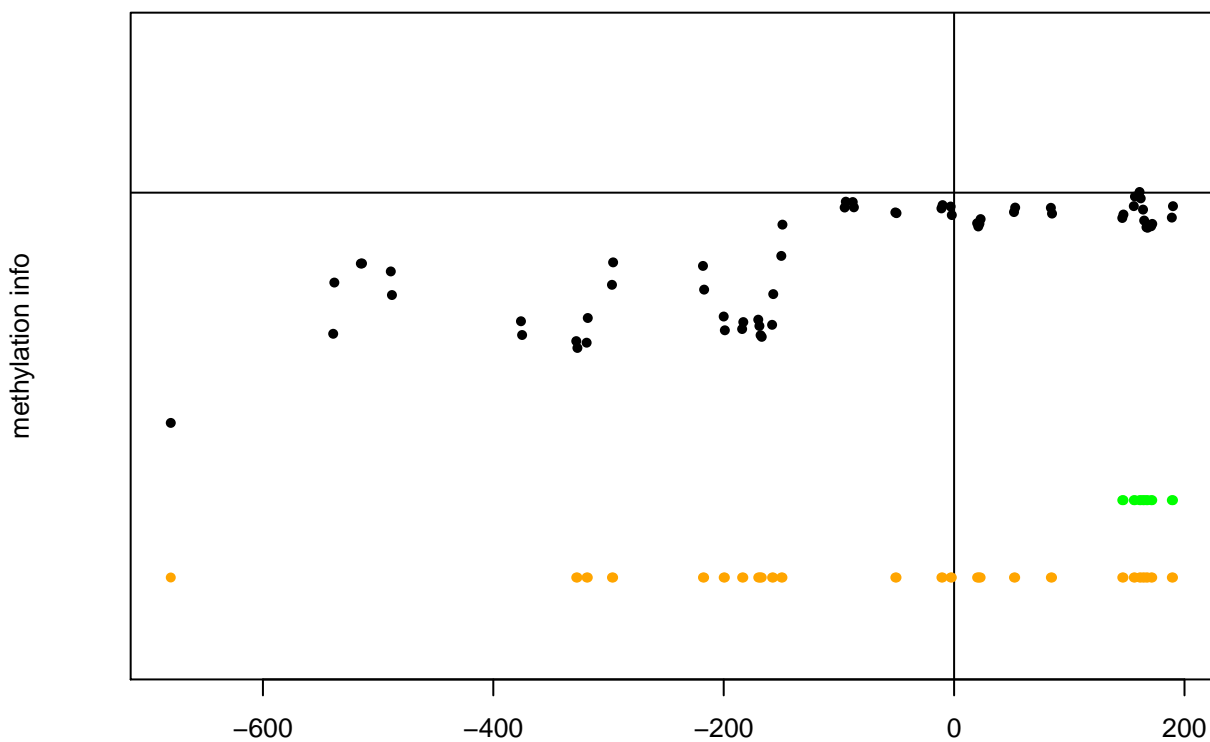

CR1 raw %methylation, red=UC, blue=Normal

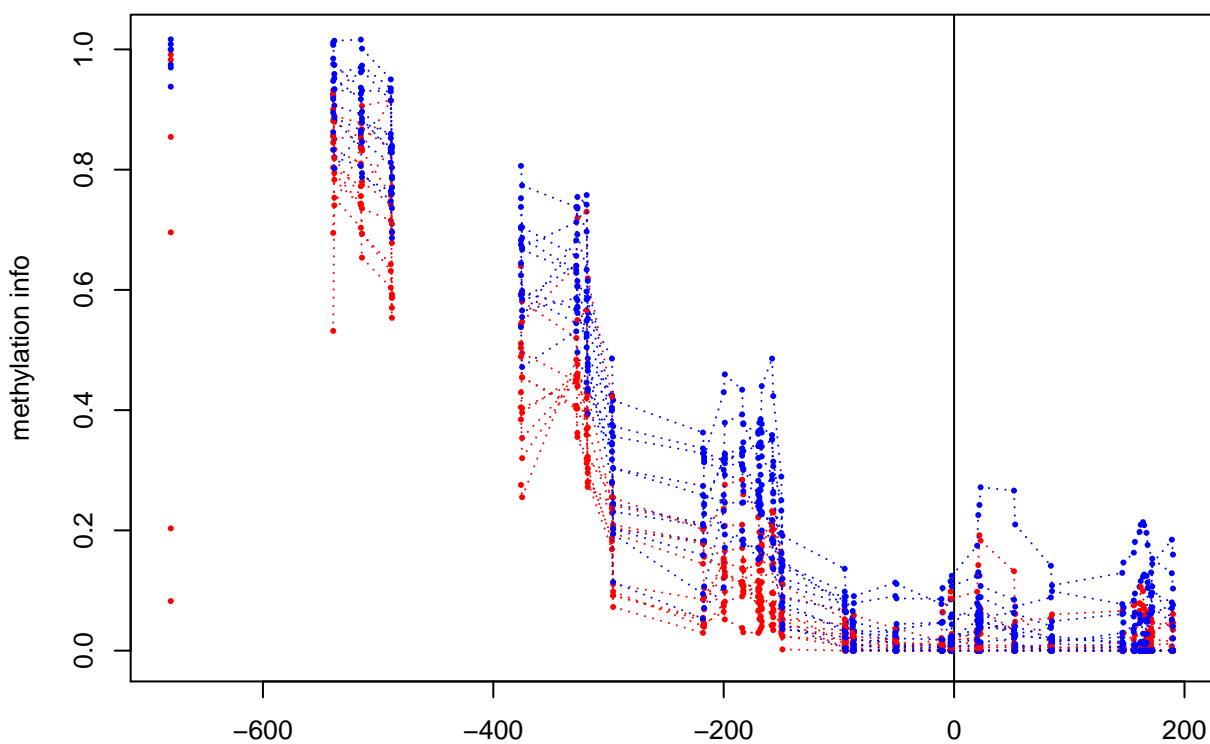

RNAseq logFC(UC-N)= 2.21

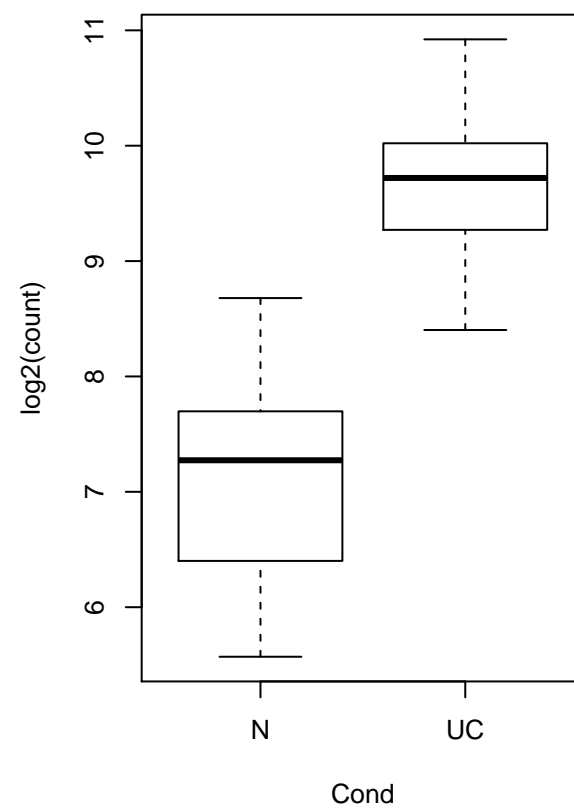

CSF2RB average UC-N %methylation max=-0.57% min=-21.51%

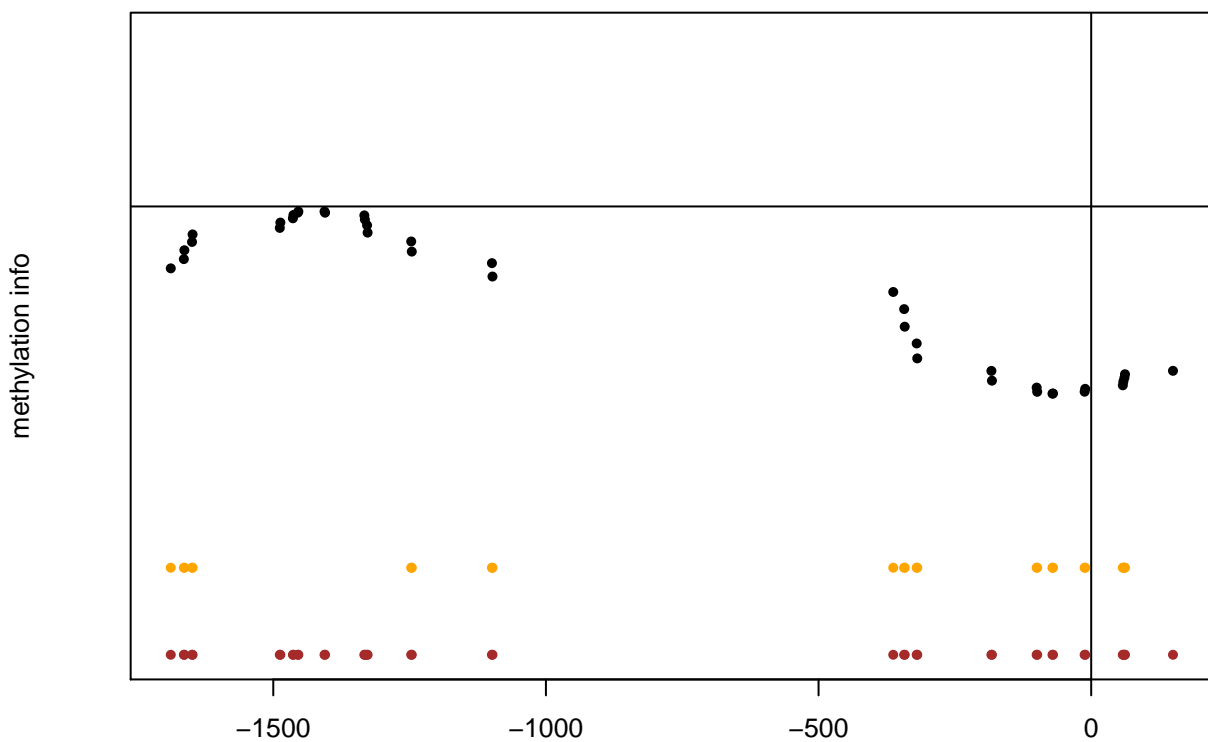

CSF2RB raw %methylation, red=UC, blue=Normal

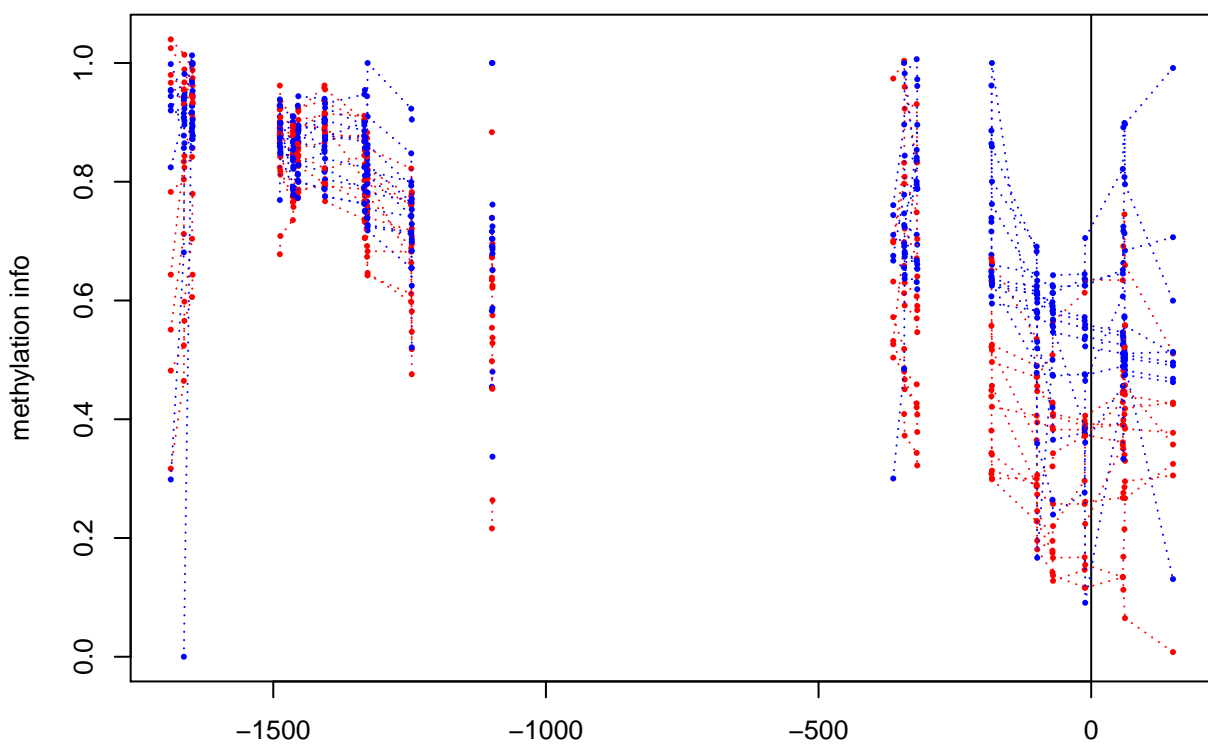

RNAseq logFC(UC-N)= 1.49

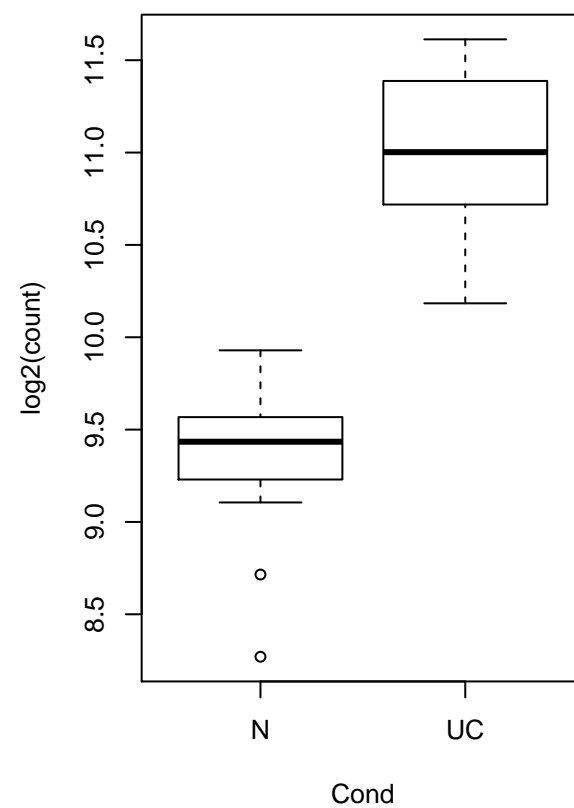

CSF3R average UC-N %methylation max=-18.57% min=-24.87%

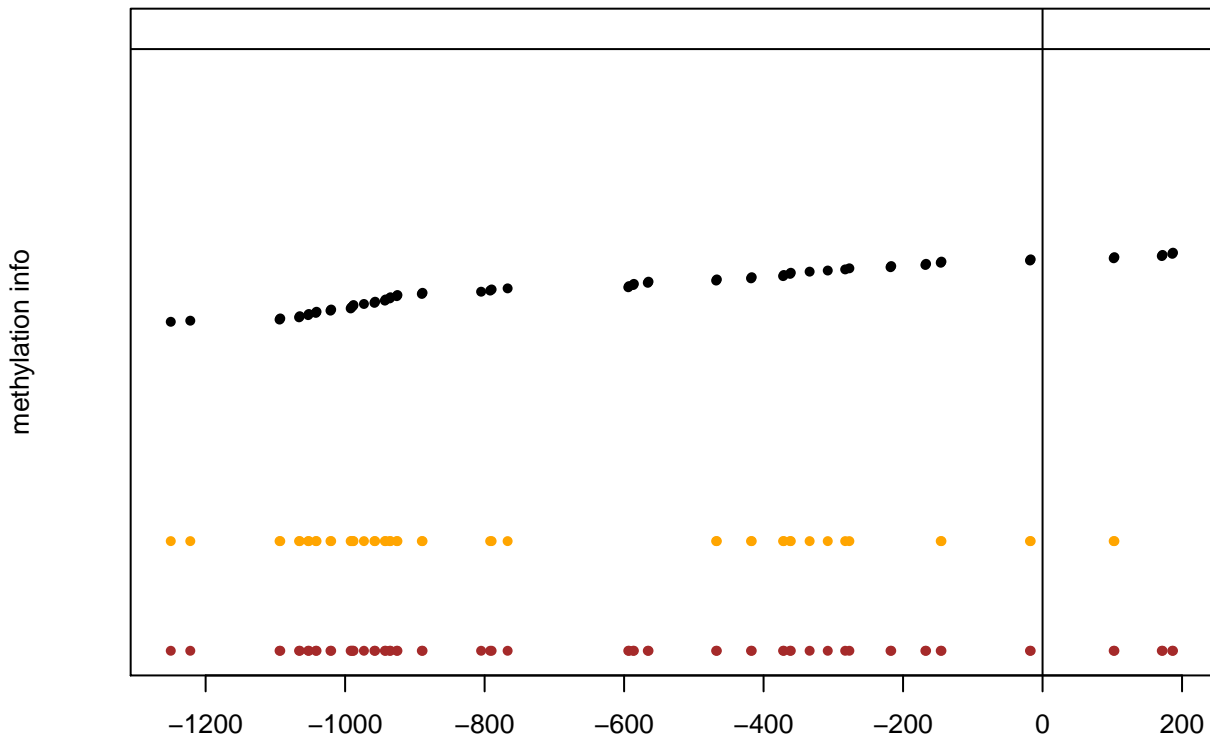

CSF3R raw %methylation, red=UC, blue=Normal

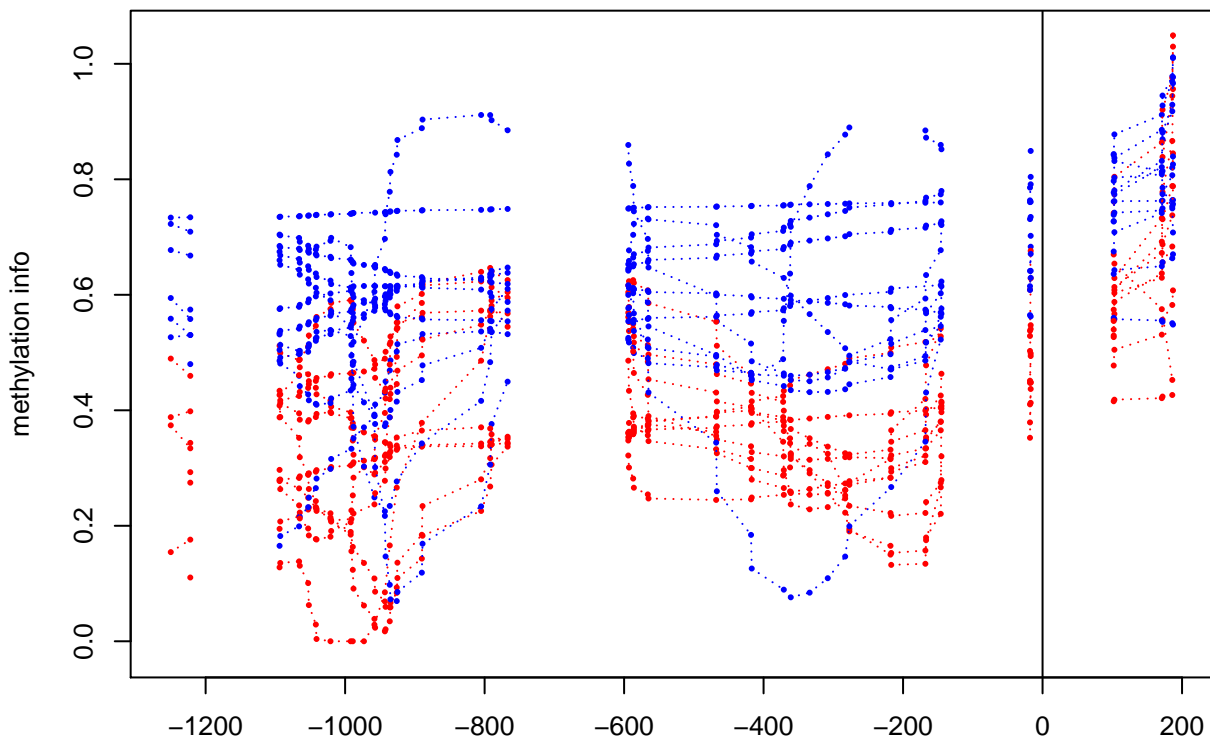

RNAseq logFC(UC-N)= 2.63

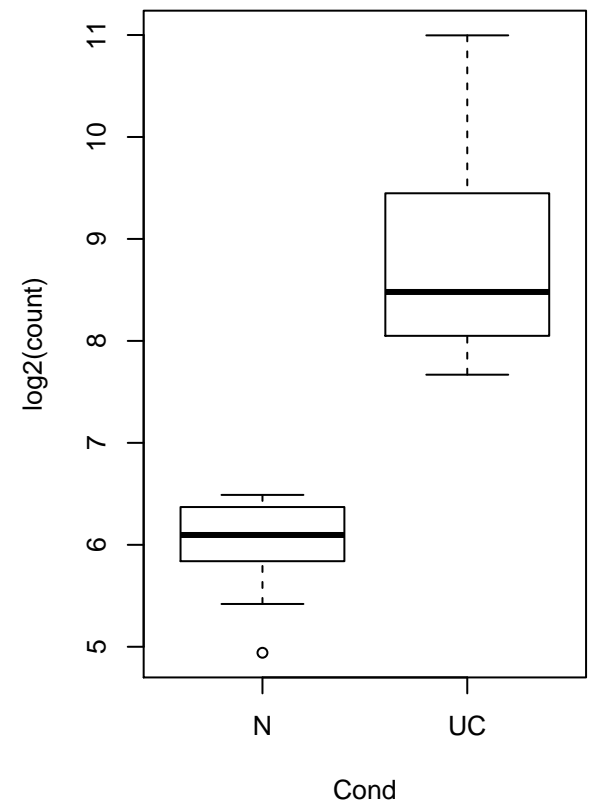

CST7 average UC-N %methylation max=-19.96% min=-30.85%

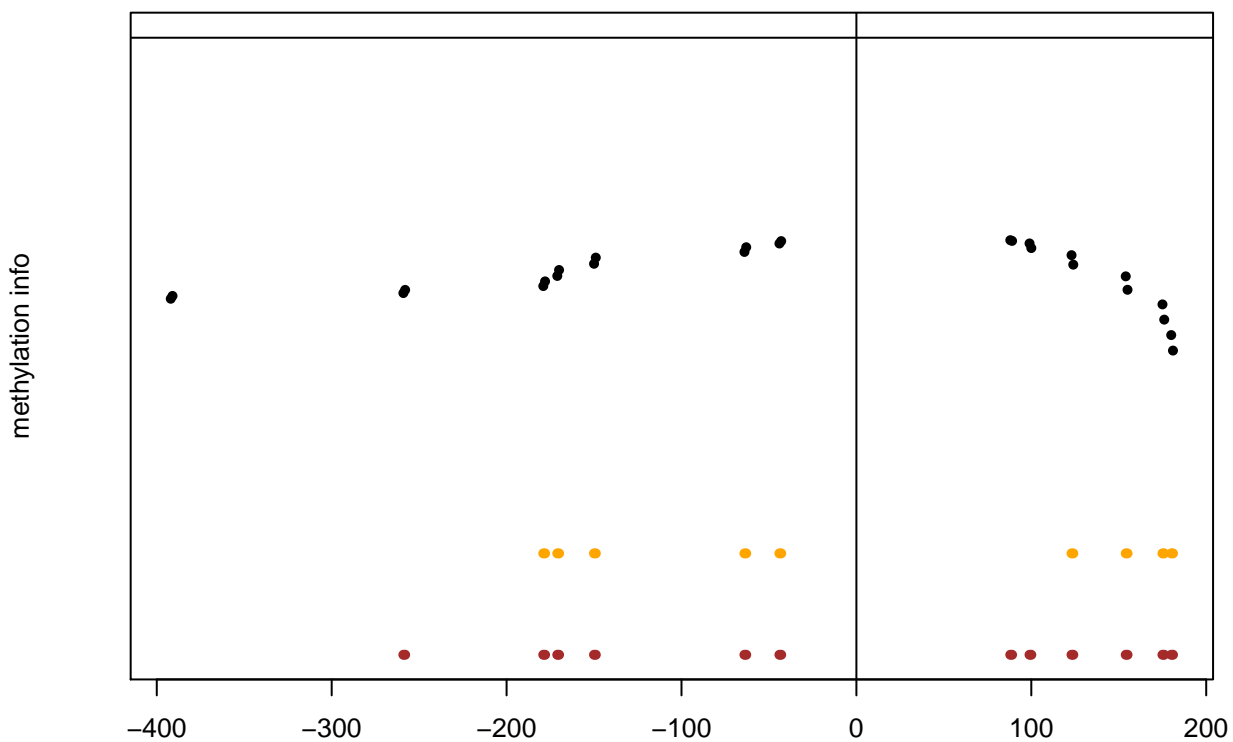

CST7 raw %methylation, red=UC, blue=Normal

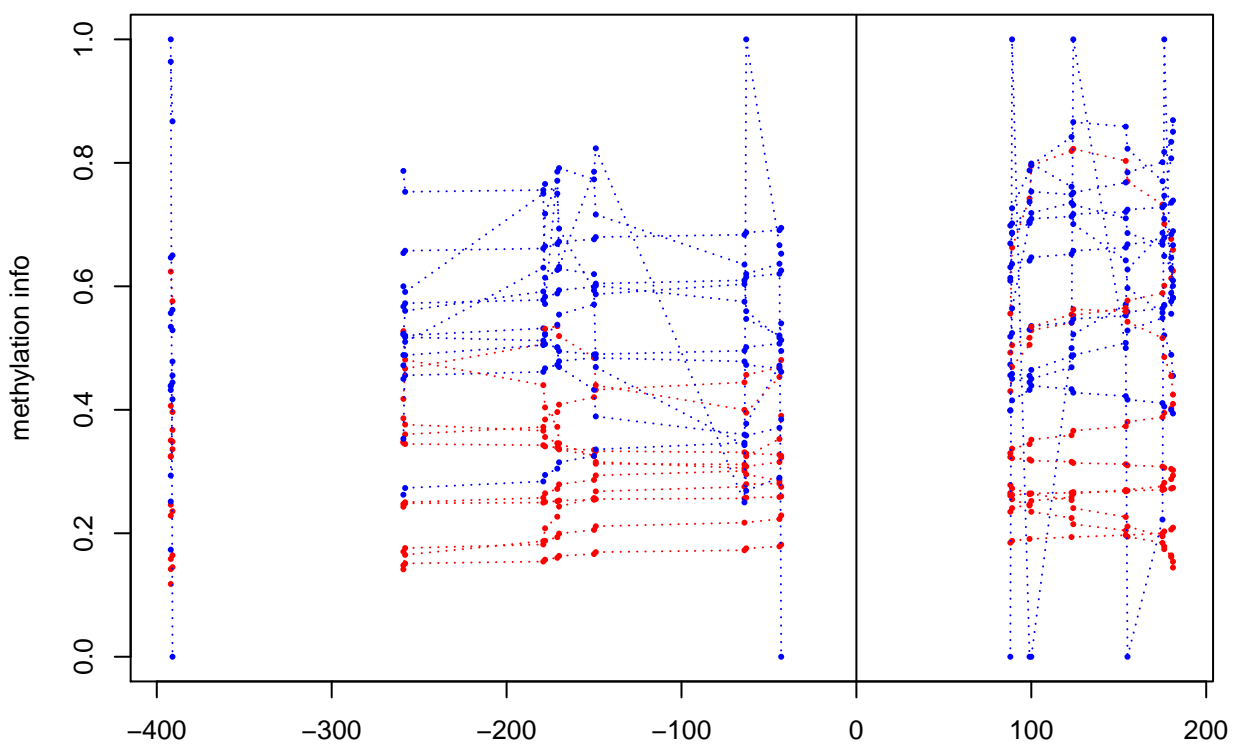

RNAseq logFC(UC-N)= 1.56

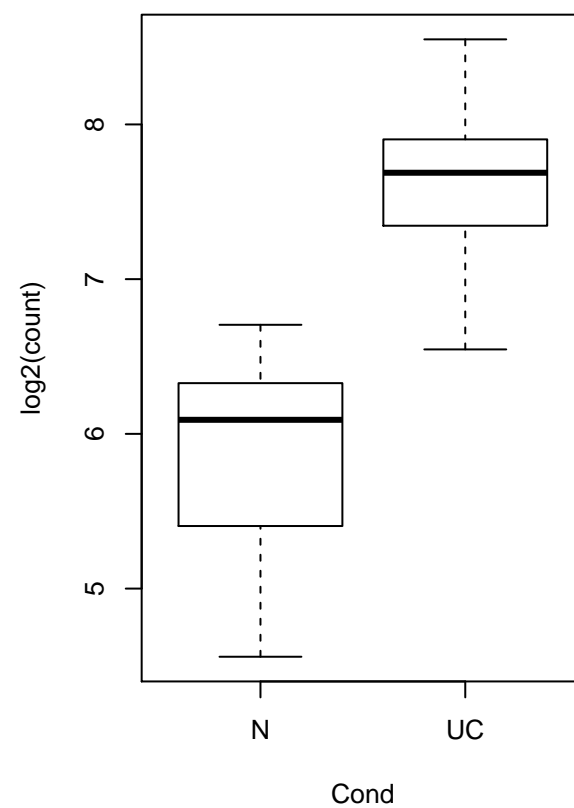

CTLA4 average UC-N %methylation max=-1.31% min=-34.87%

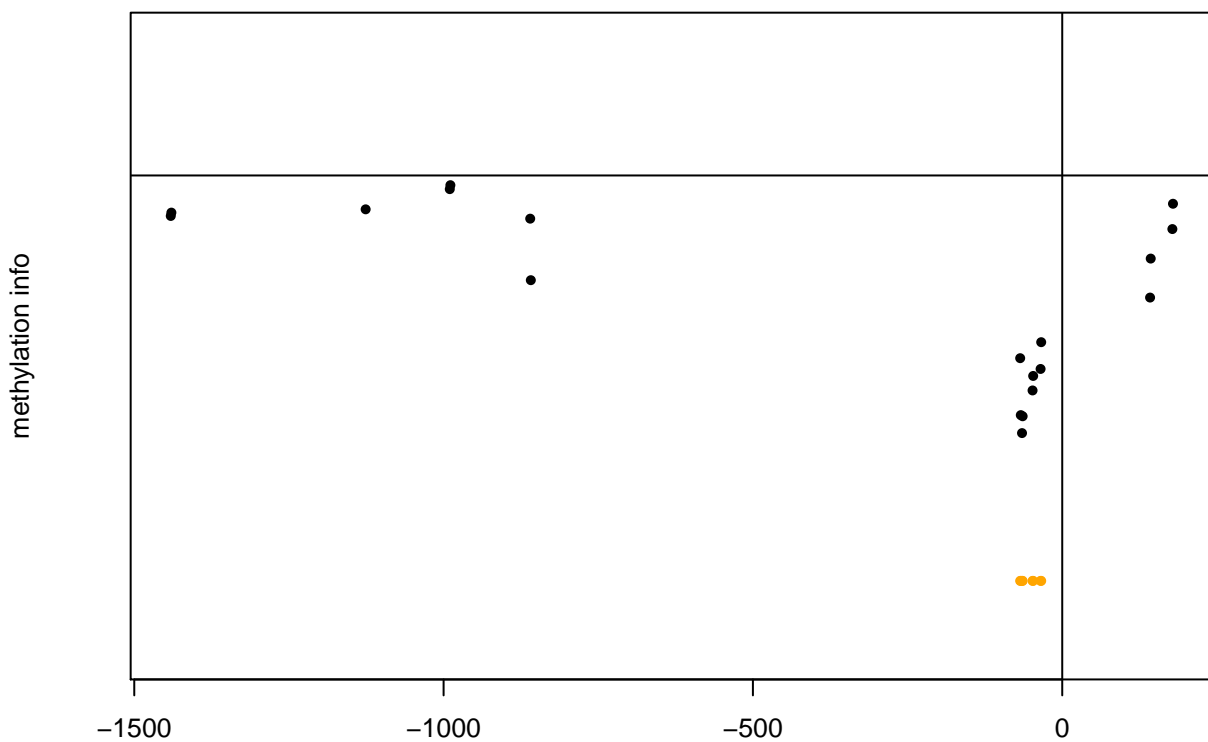

CTLA4 raw %methylation, red=UC, blue=Normal

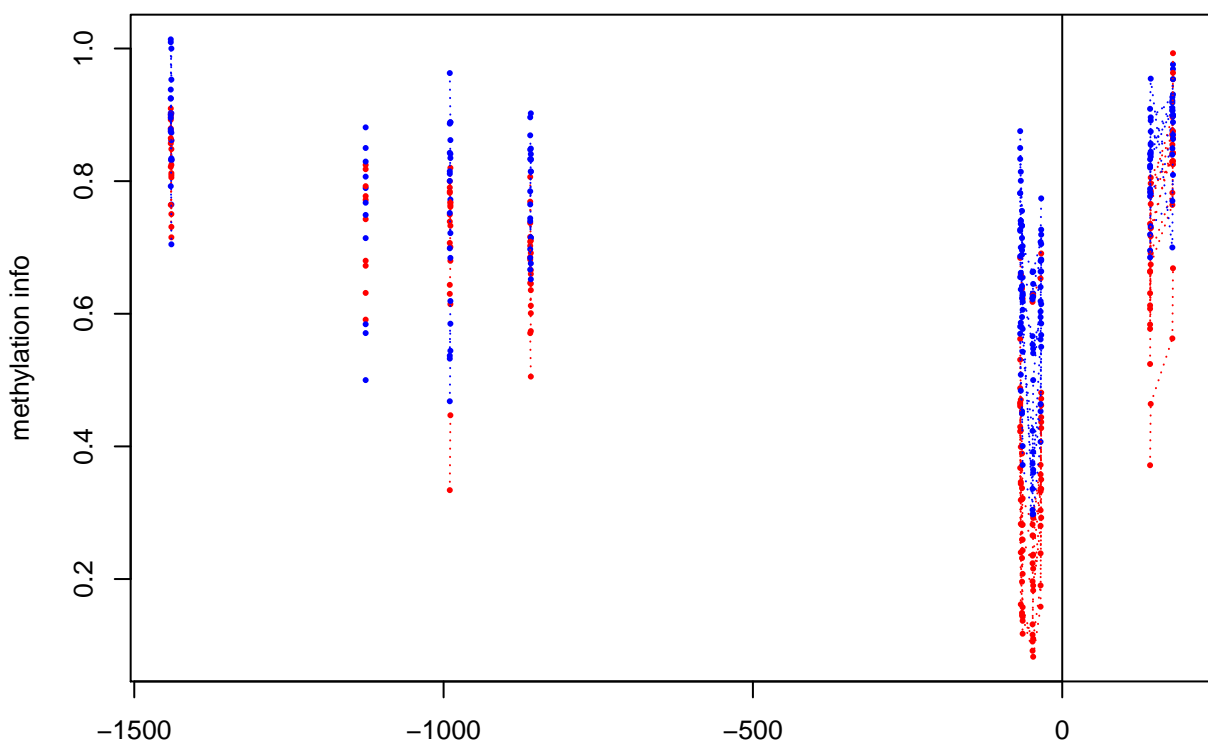

RNAseq logFC(UC-N)= 2.58

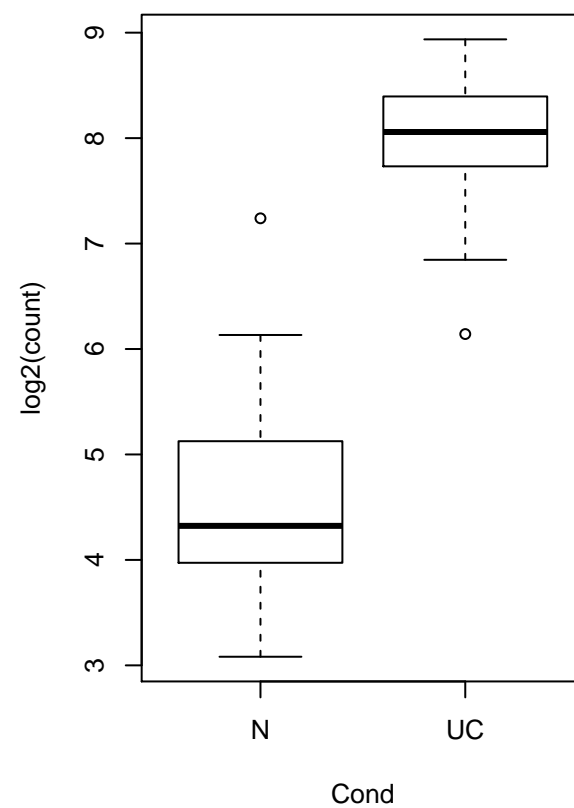

CTSK average UC-N %methylation max=1.13% min=-15.61%

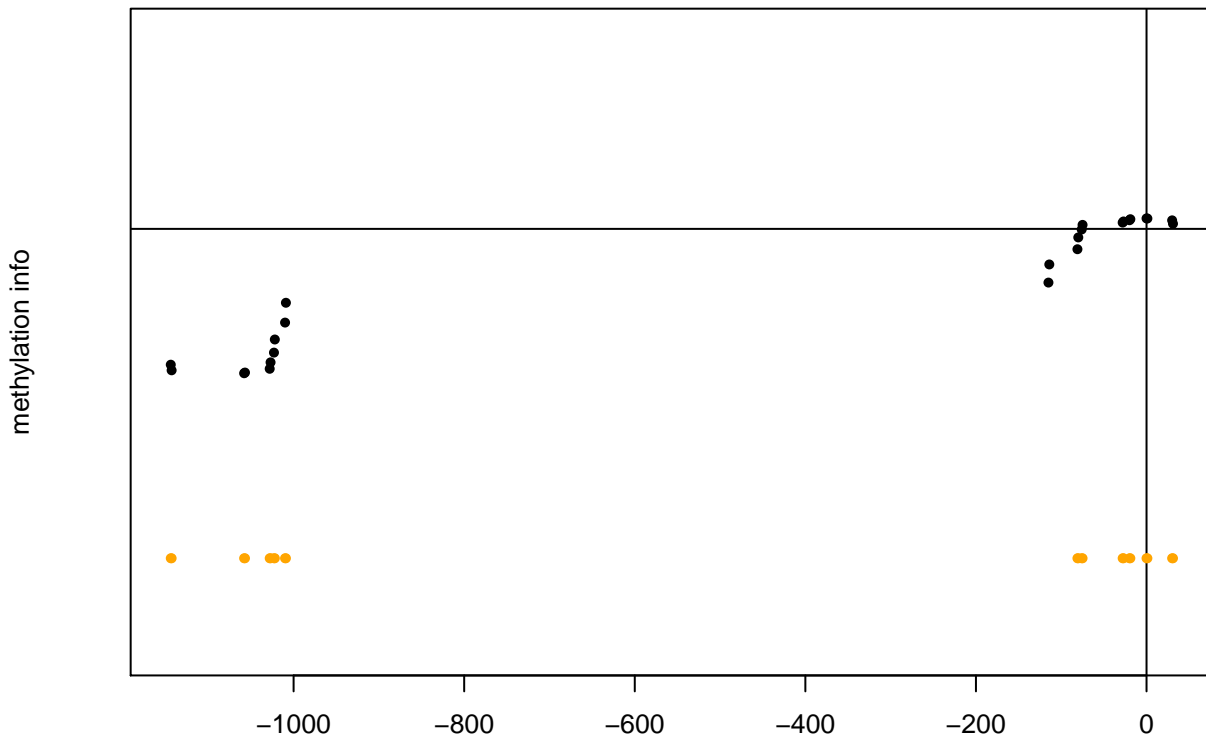

CTSK raw %methylation, red=UC, blue=Normal

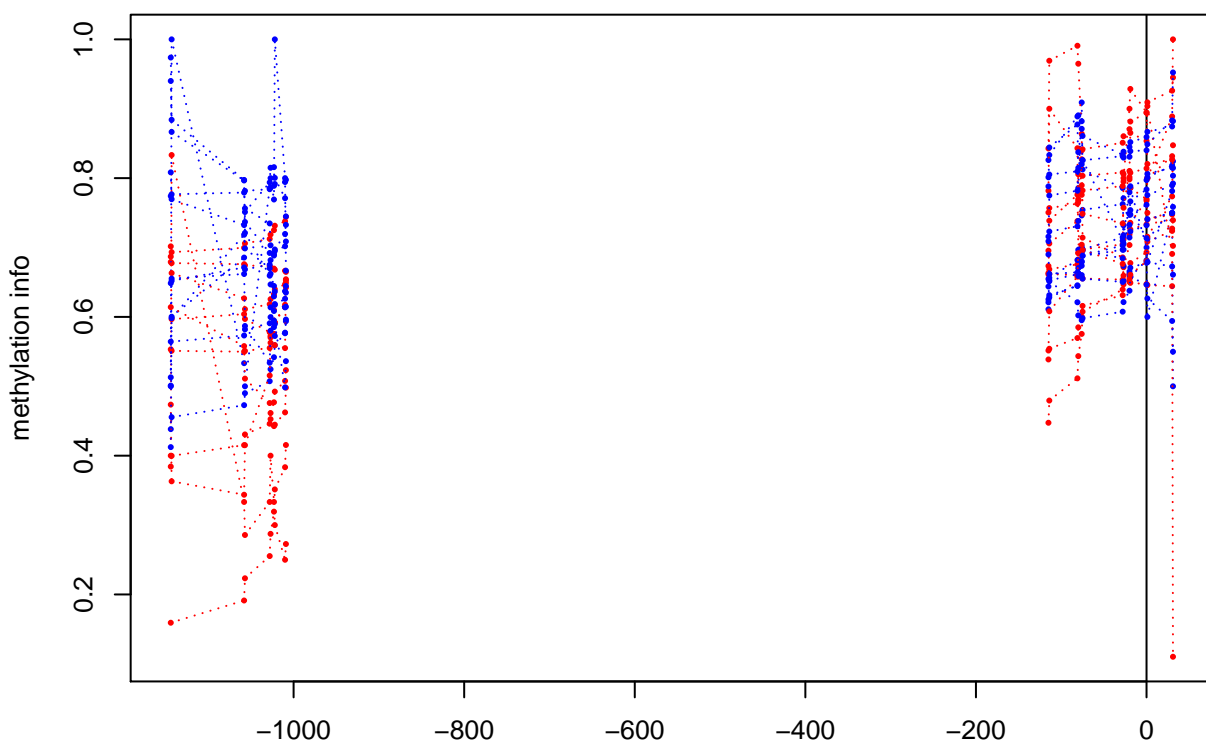

RNAseq logFC(UC-N)= 1.23

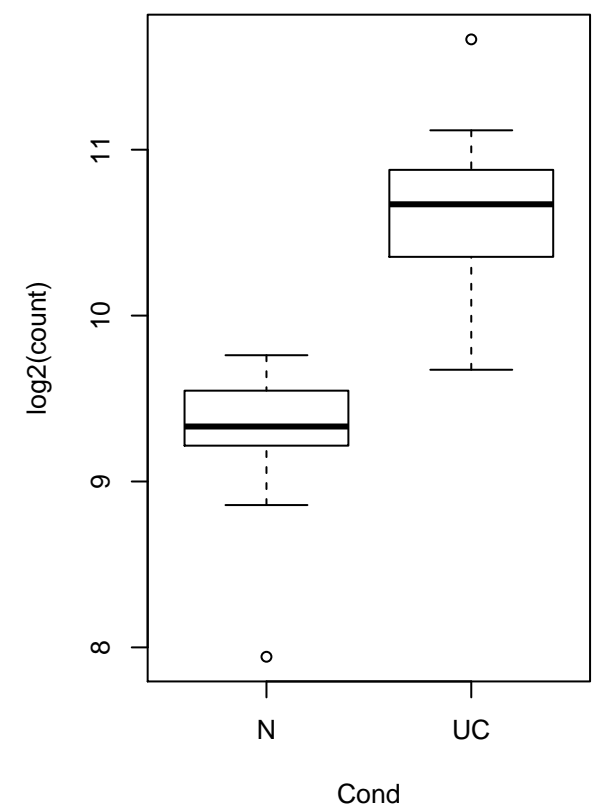

CXCL10 average UC-N %methylation max=6.83% min=-27.5%

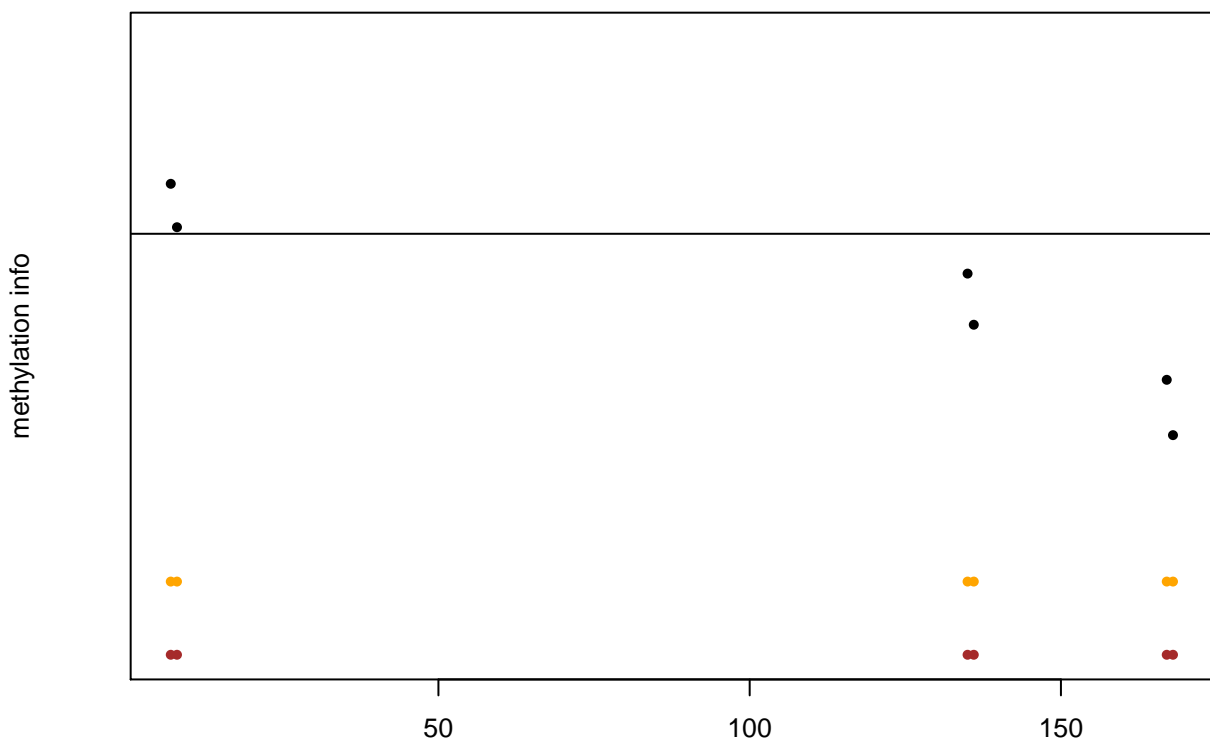

CXCL10 raw %methylation, red=UC, blue=Normal

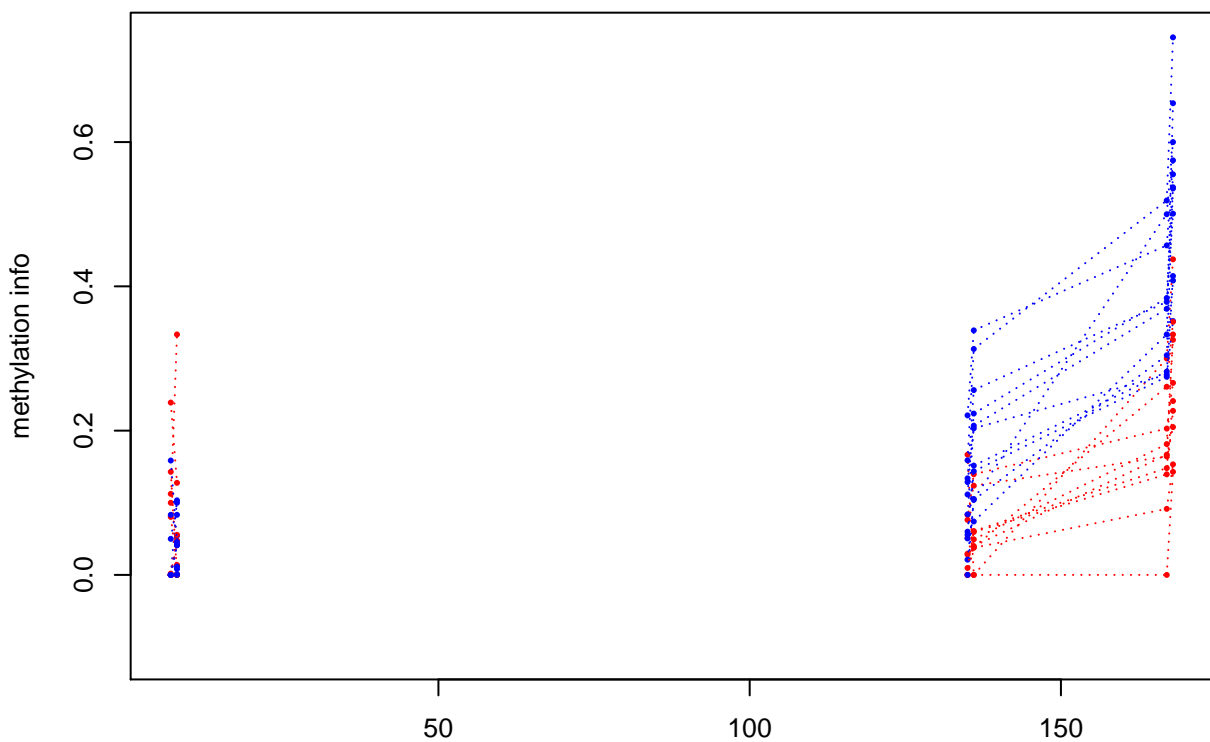

RNAseq logFC(UC-N)= 2.2

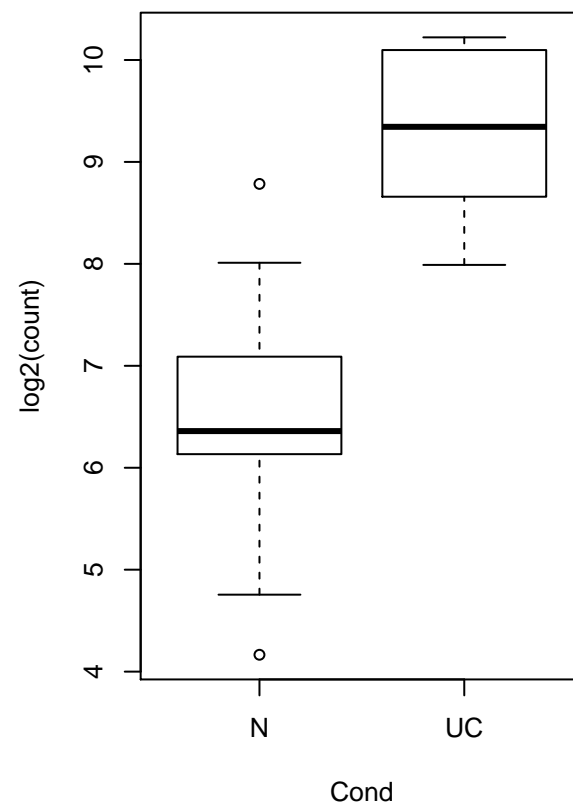



CXCL5 average UC-N %methylation max=-17.57% min=-22.88%

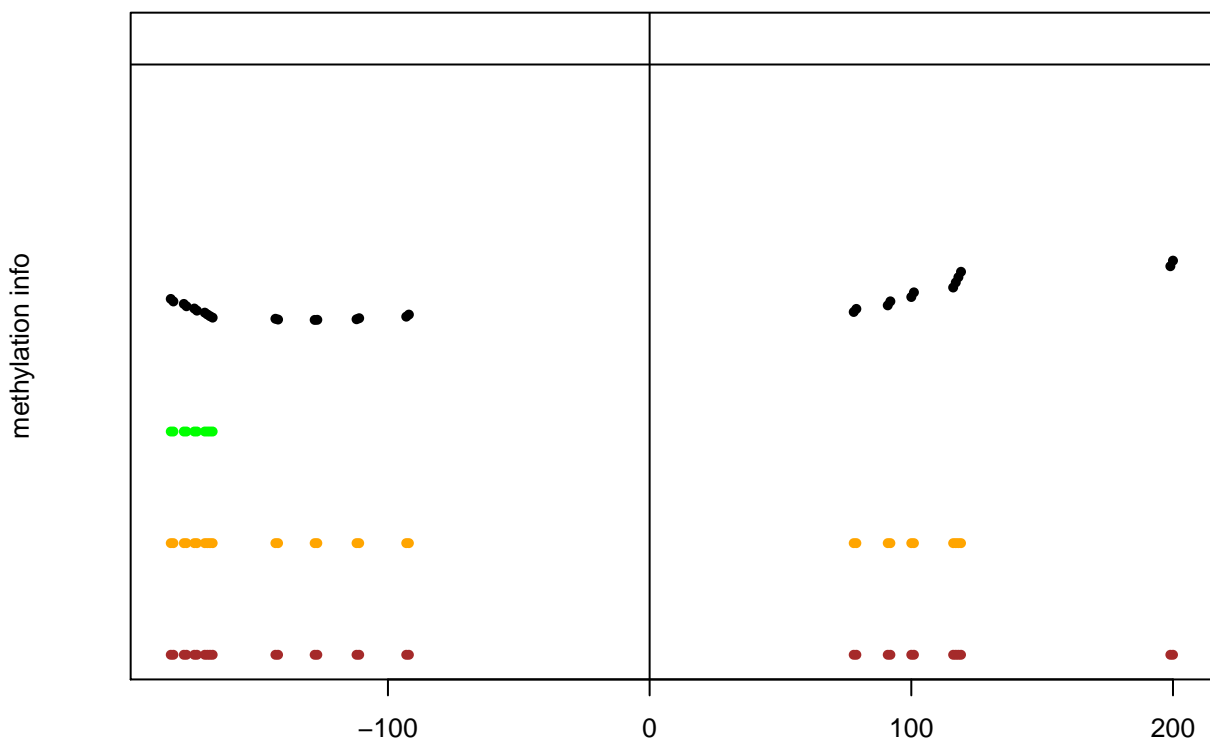

CXCL5 raw %methylation, red=UC, blue=Normal

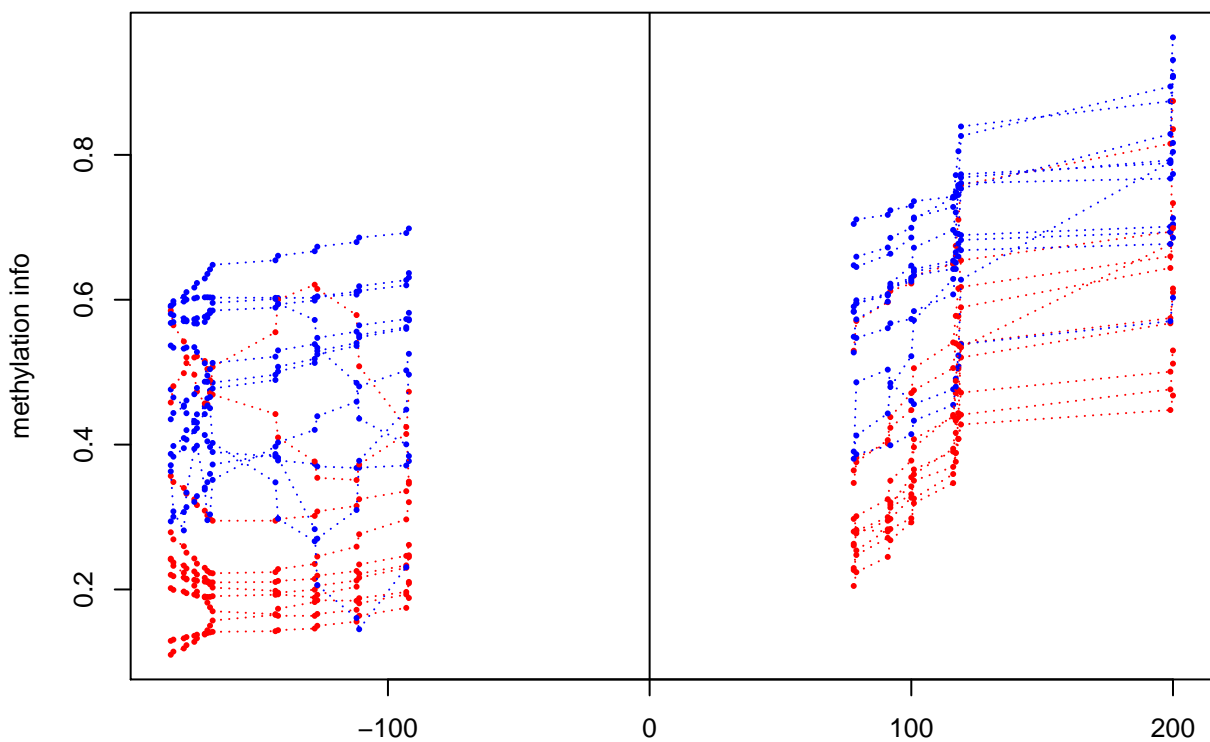

RNAseq logFC(UC-N)= 4.63

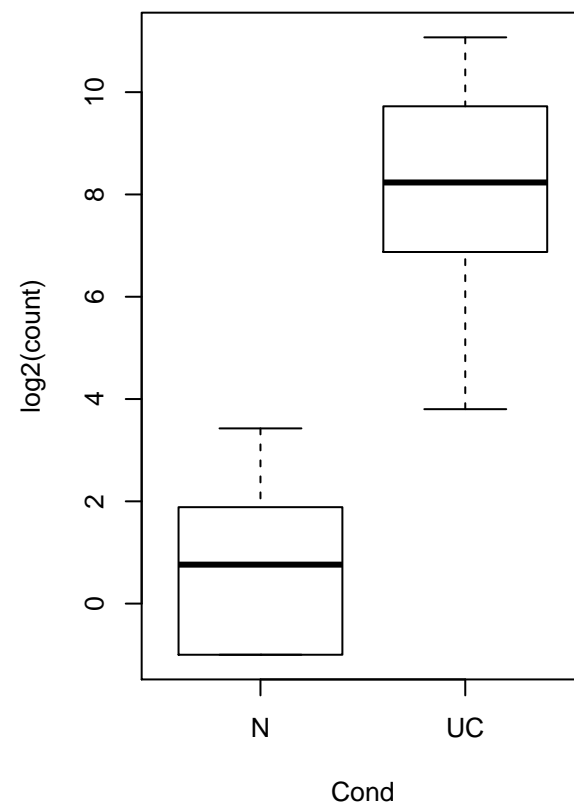

CXCL6 average UC-N %methylation max=-1.07% min=-19.16%

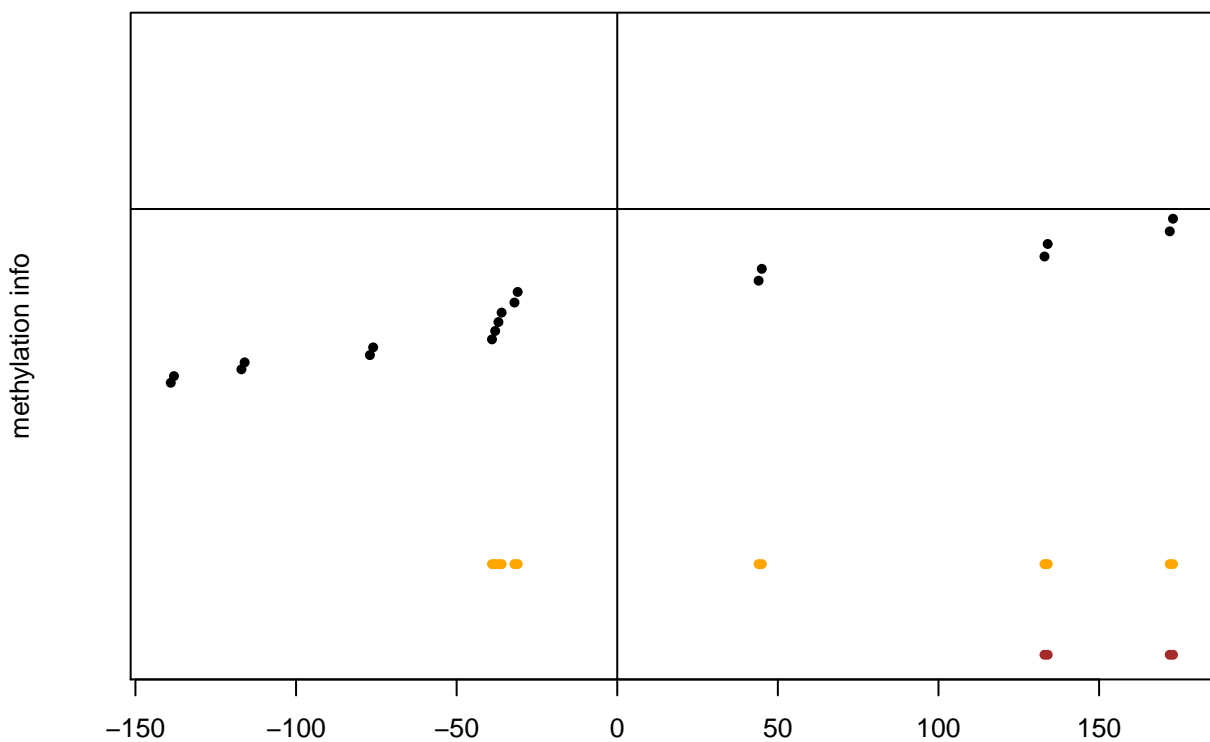

CXCL6 raw %methylation, red=UC, blue=Normal

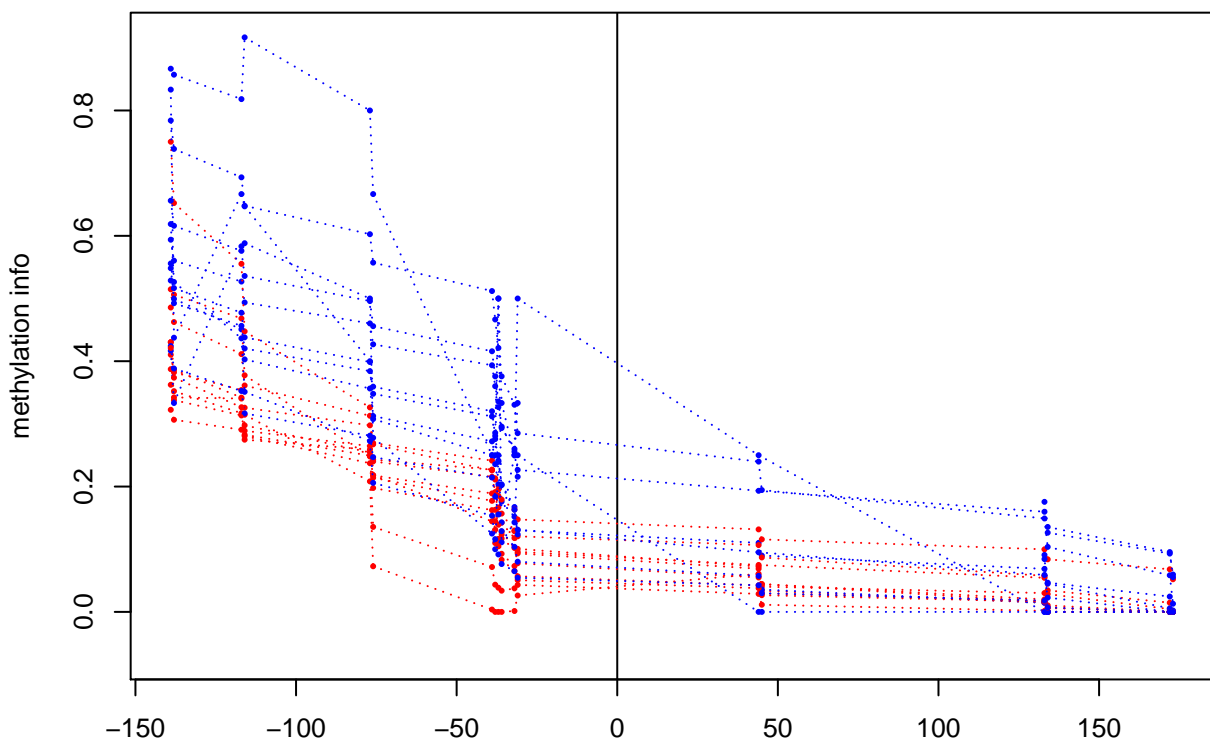

RNAseq logFC(UC-N)= 4.06

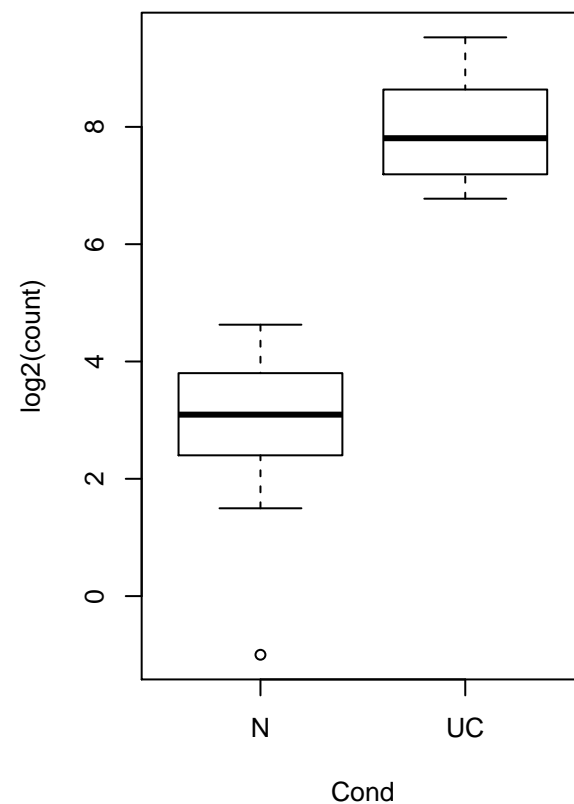

CXCR1 average UC-N %methylation max=-8.32% min=-12.22%

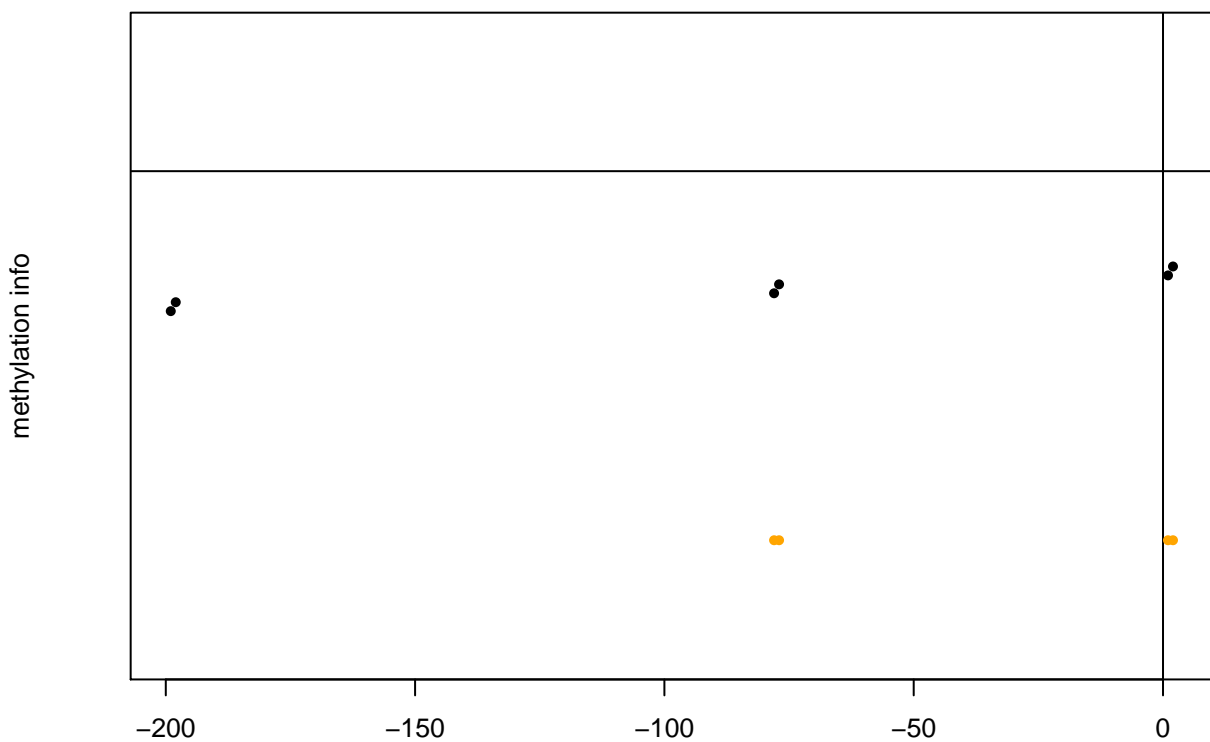

CXCR1 raw %methylation, red=UC, blue=Normal

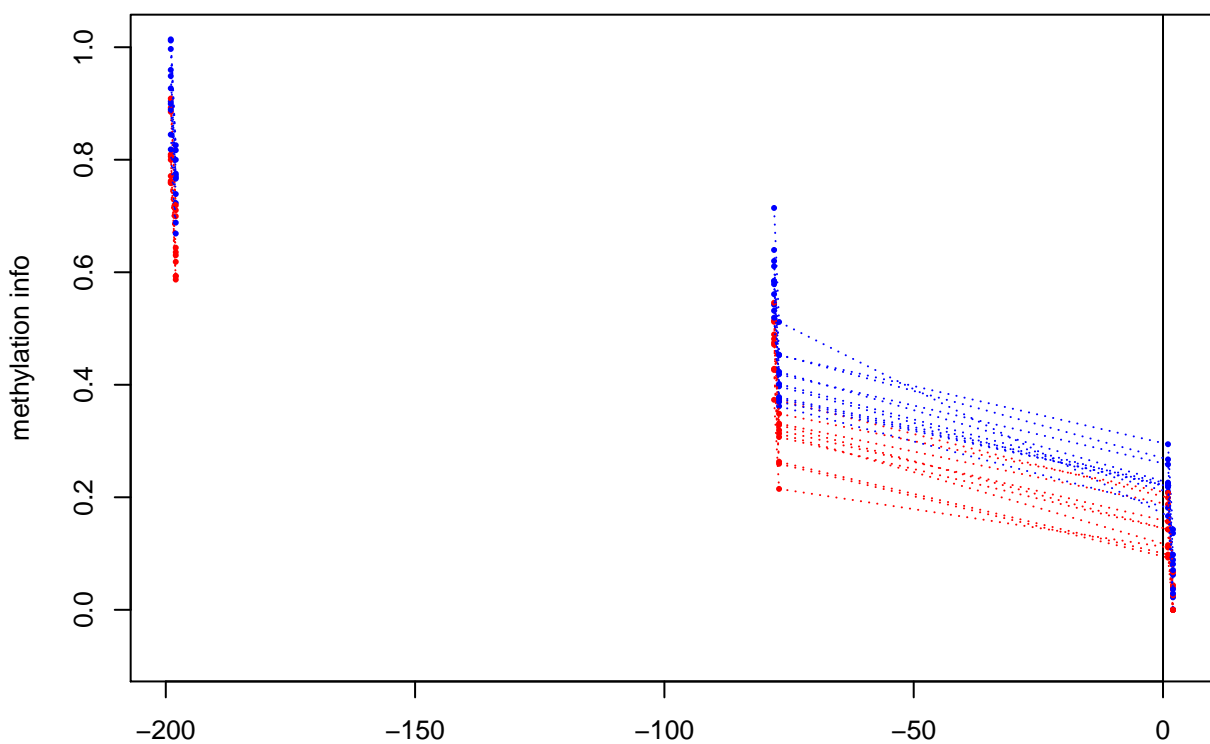

RNAseq logFC(UC-N)= 4.64

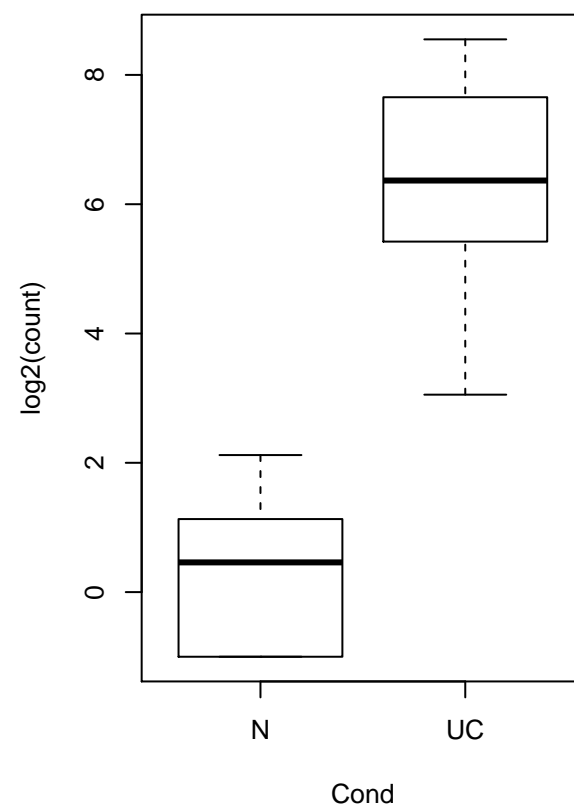

CXCR2 average UC-N %methylation max=-8.87% min=-11.98%

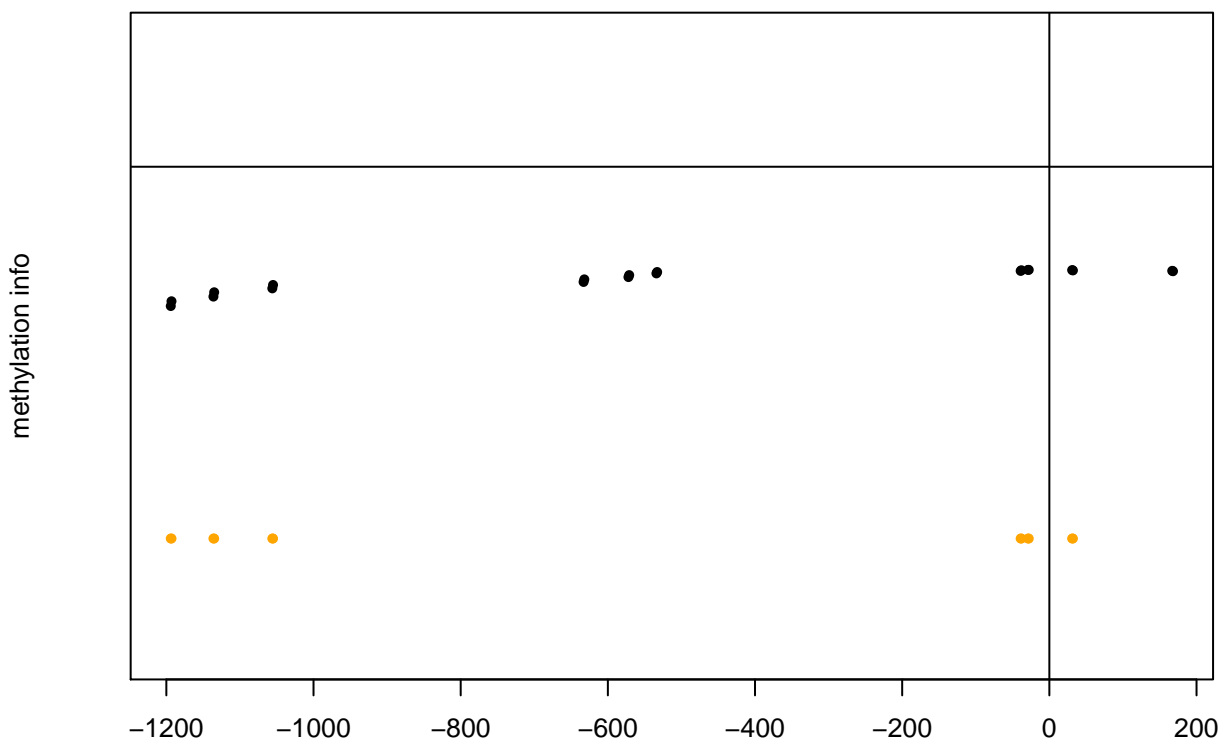

CXCR2 raw %methylation, red=UC, blue=Normal

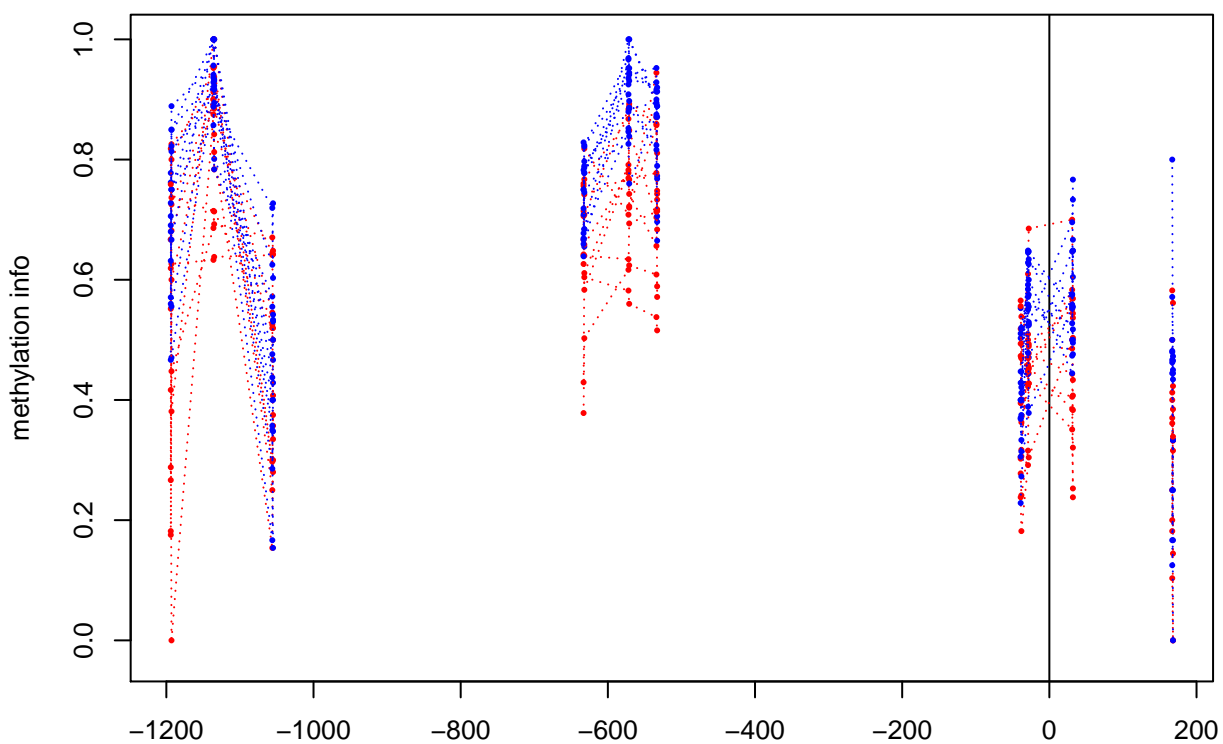

RNAseq logFC(UC-N)= 3.44

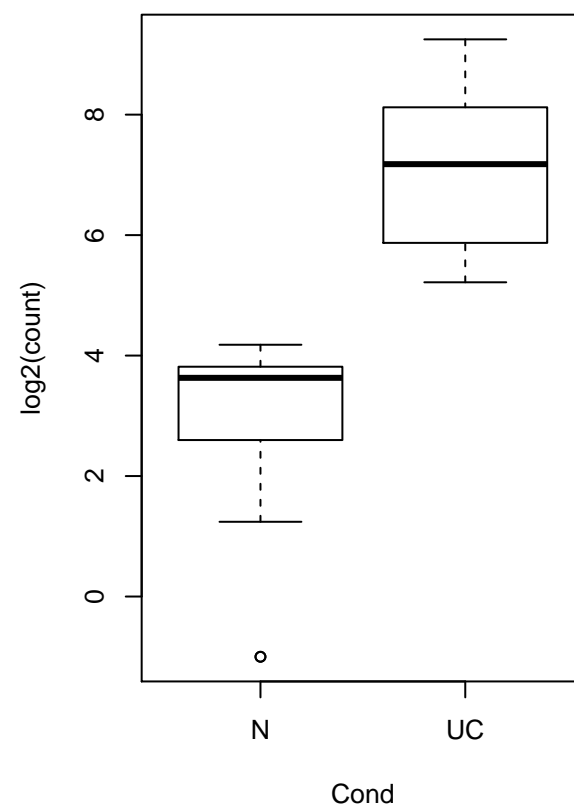

CXCR5 average UC-N %methylation max=-2.12% min=-30.77%

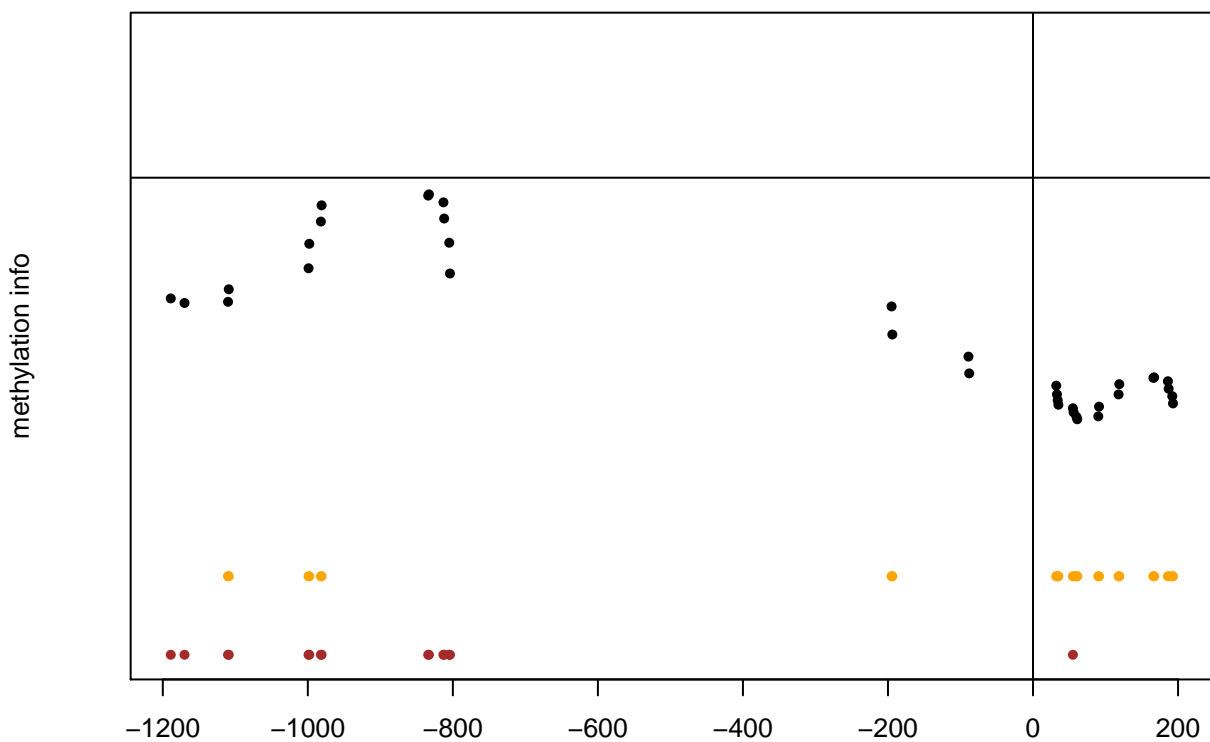

CXCR5 raw %methylation, red=UC, blue=Normal

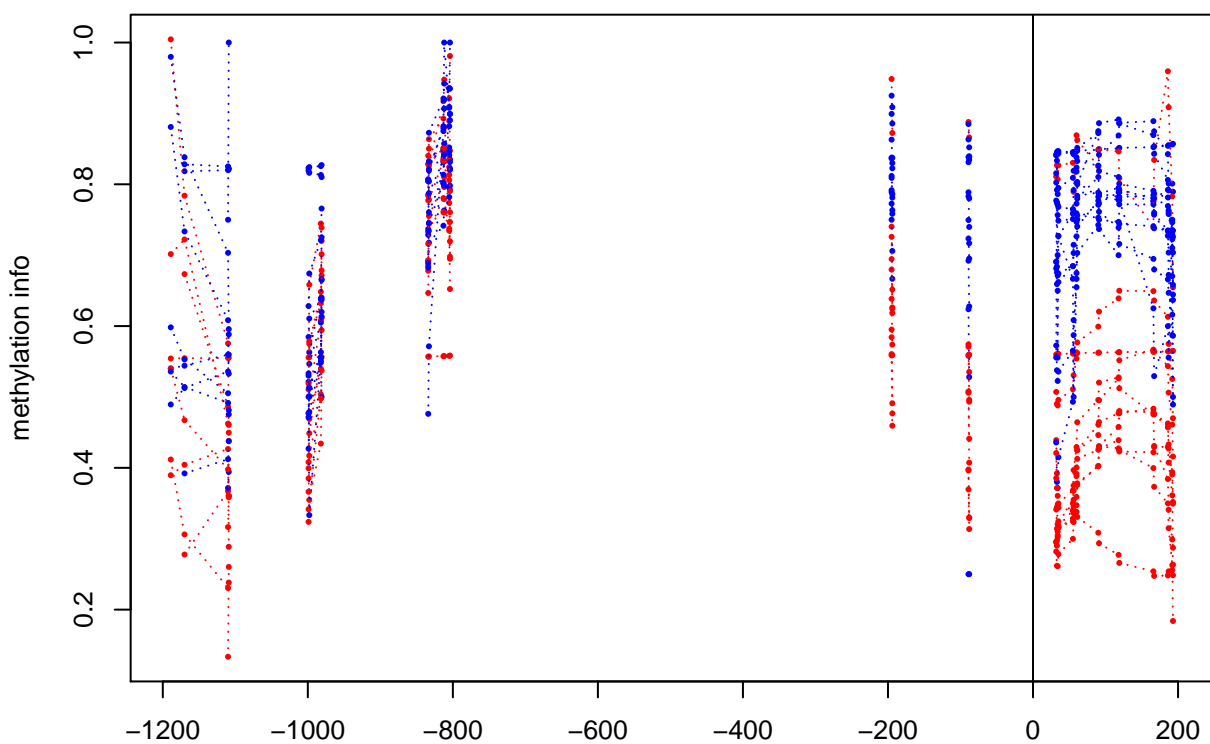

RNAseq logFC(UC-N)= 2.06

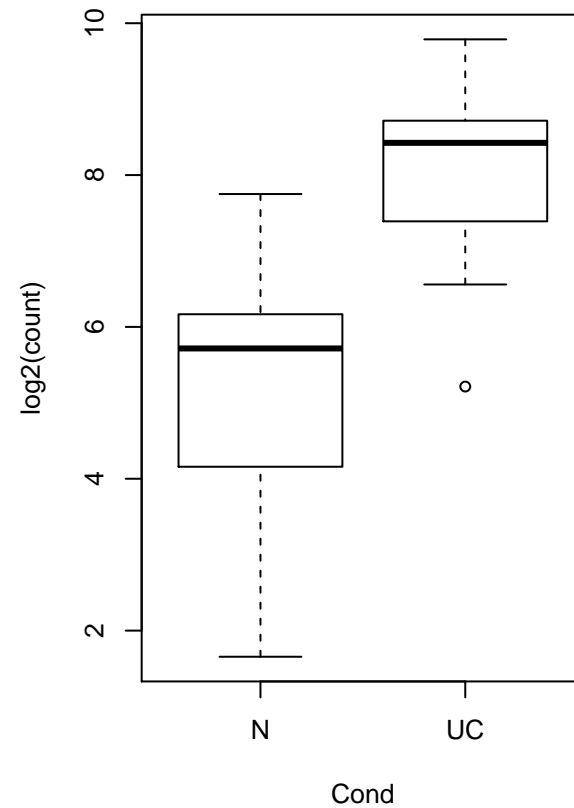

CYP4F12 average UC-N %methylation max=10.94% min=-6.46%

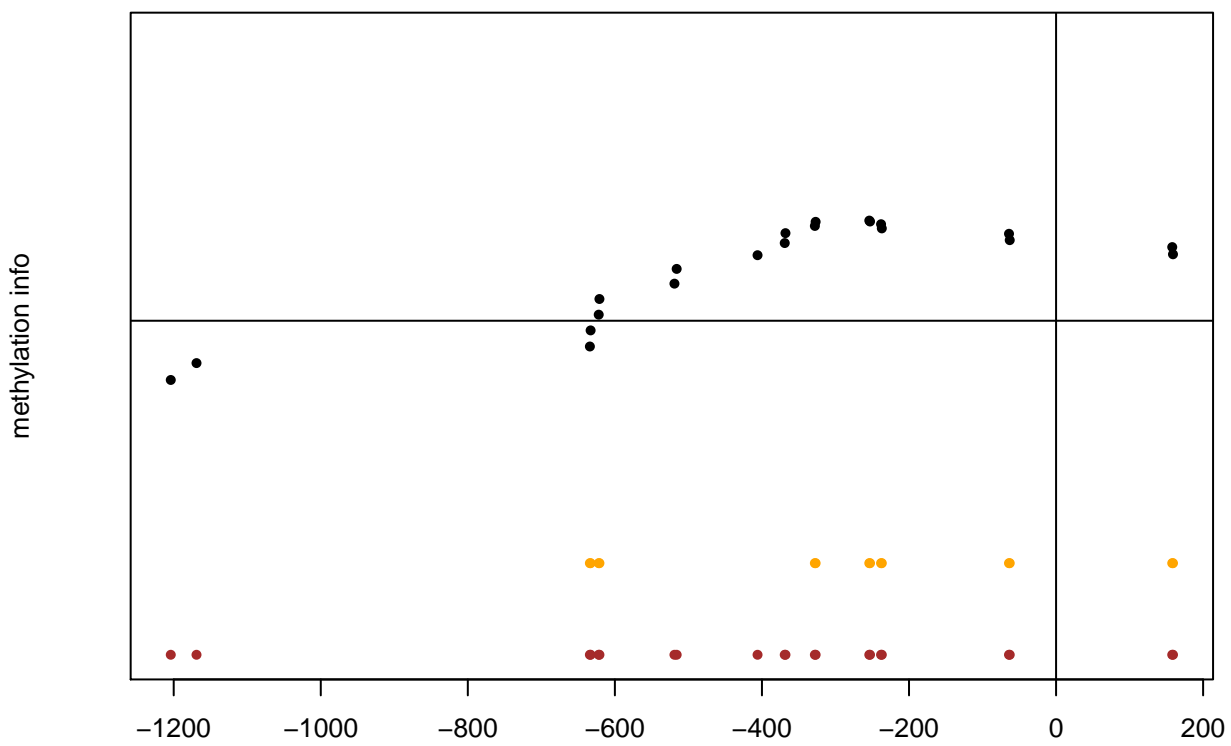

CYP4F12 raw %methylation, red=UC, blue=Normal

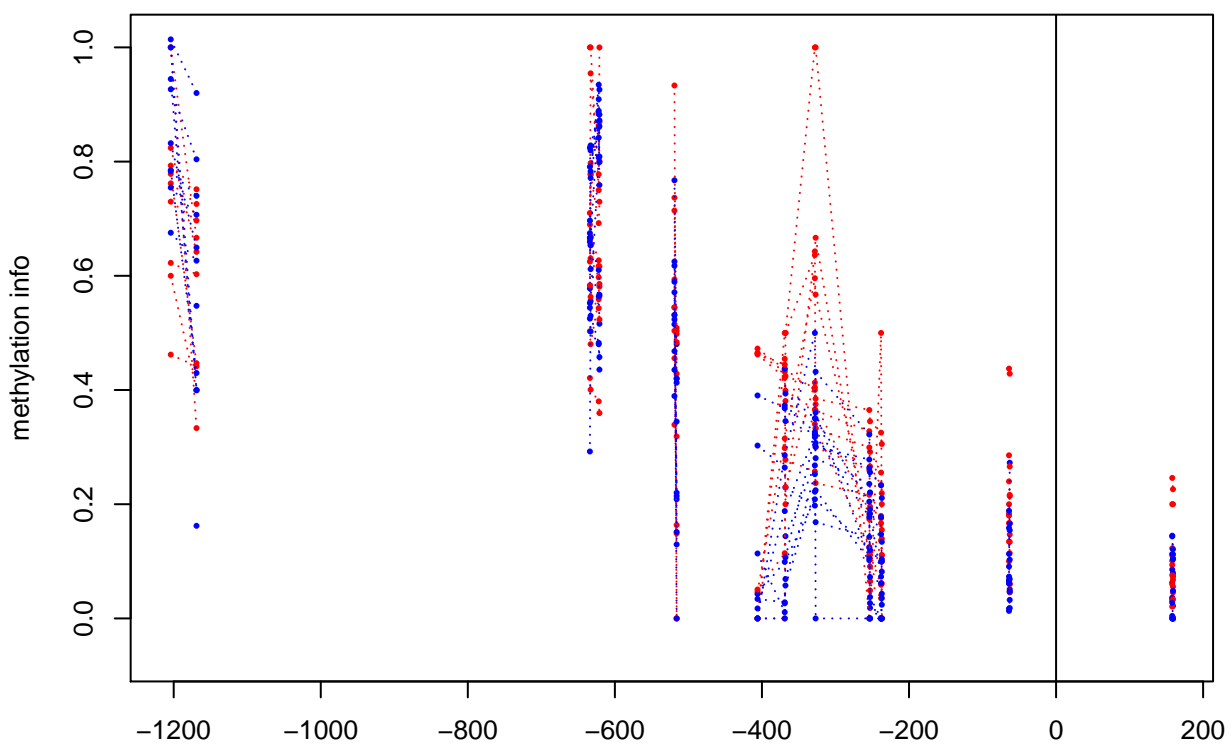

RNAseq logFC(UC-N)= -1.1

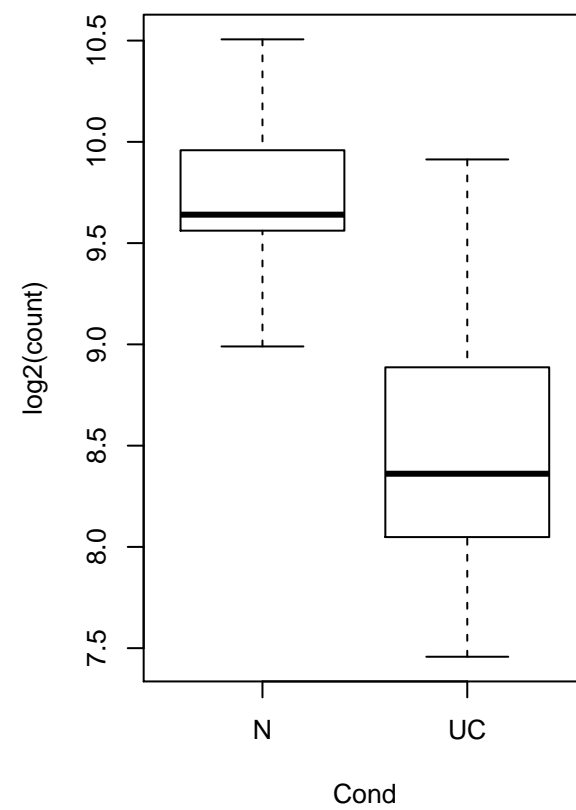

DAPP1 average UC-N %methylation max=12.85% min=-47.74%

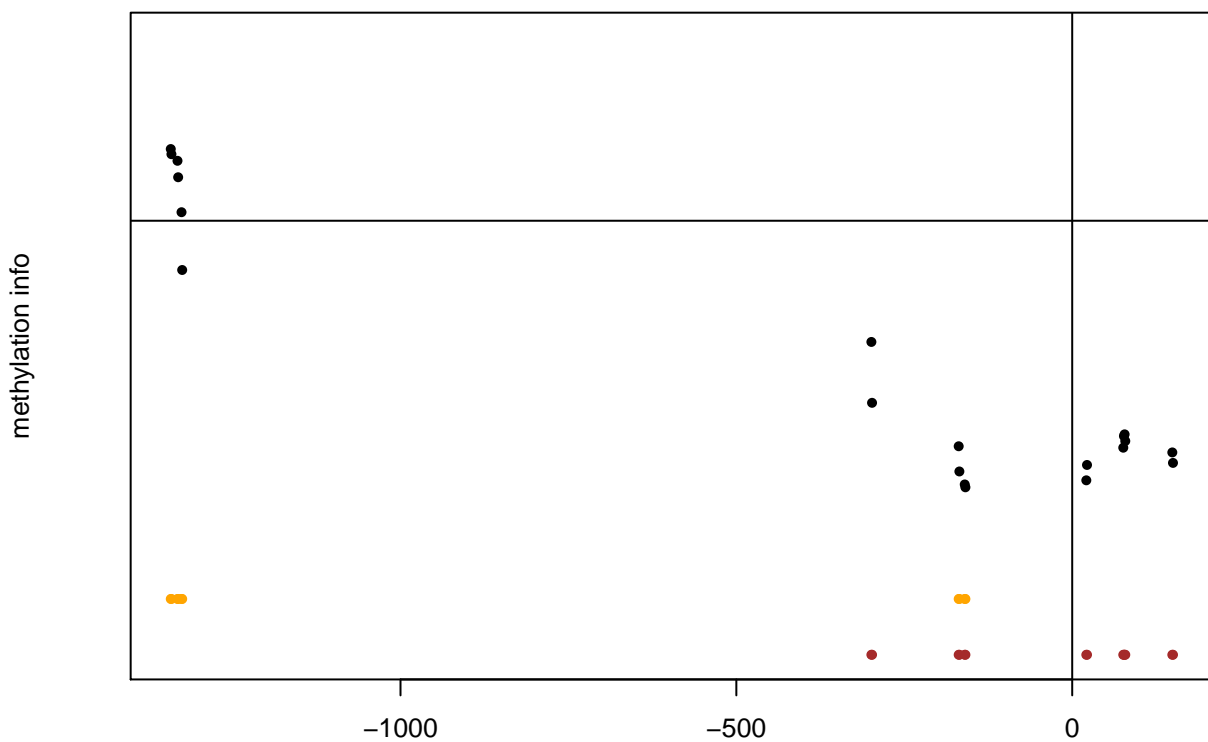

DAPP1 raw %methylation, red=UC, blue=Normal

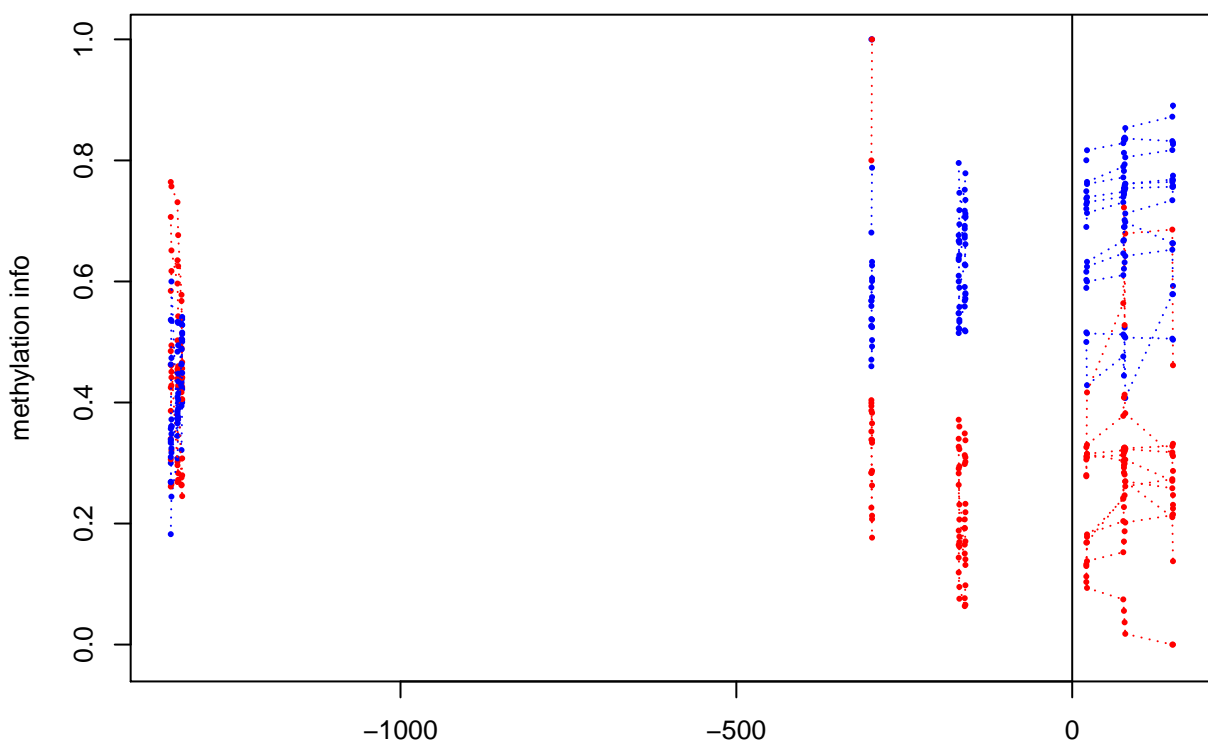

RNAseq logFC(UC-N)= 2.23

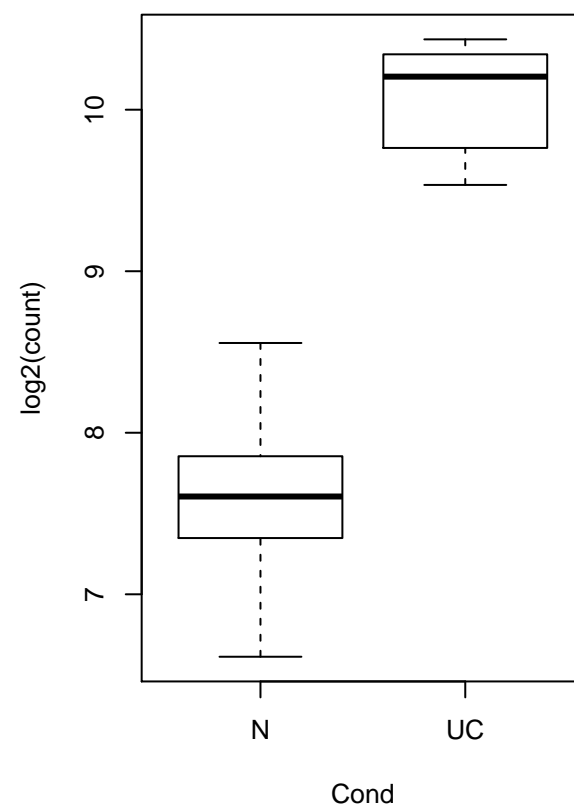

DEFA6 average UC-N %methylation max=-1.3% min=-21.5%

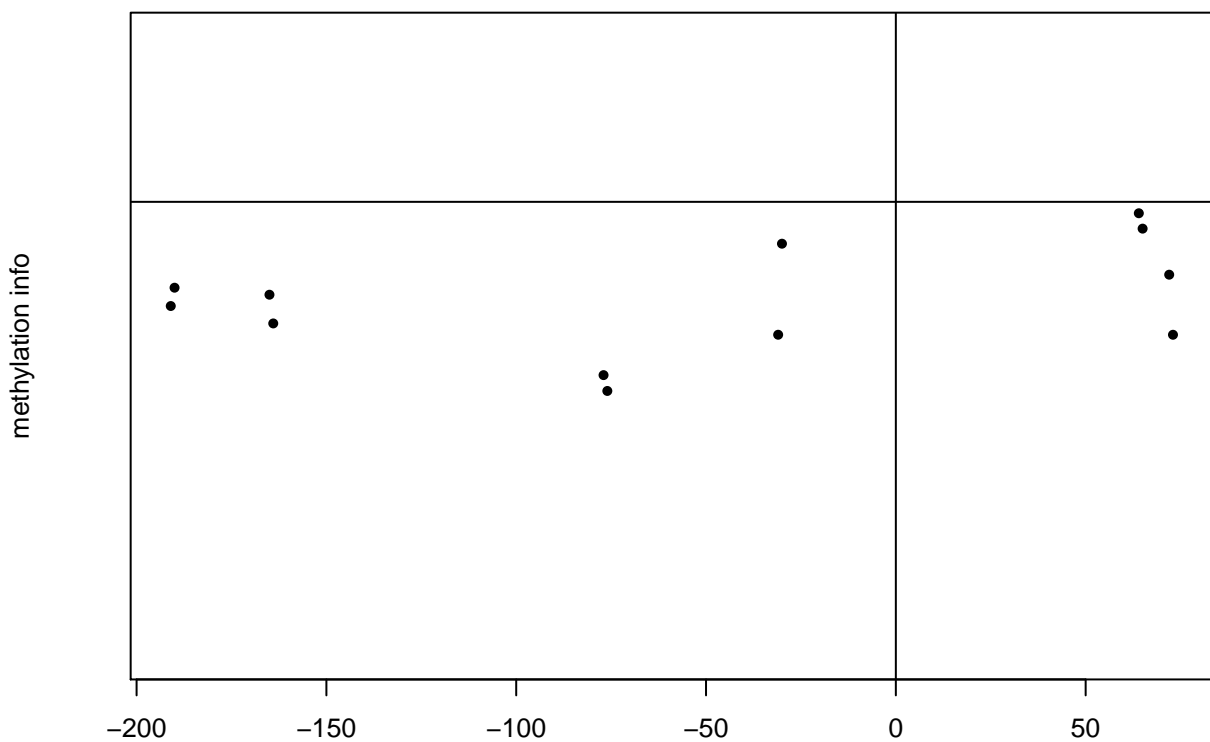

DEFA6 raw %methylation, red=UC, blue=Normal

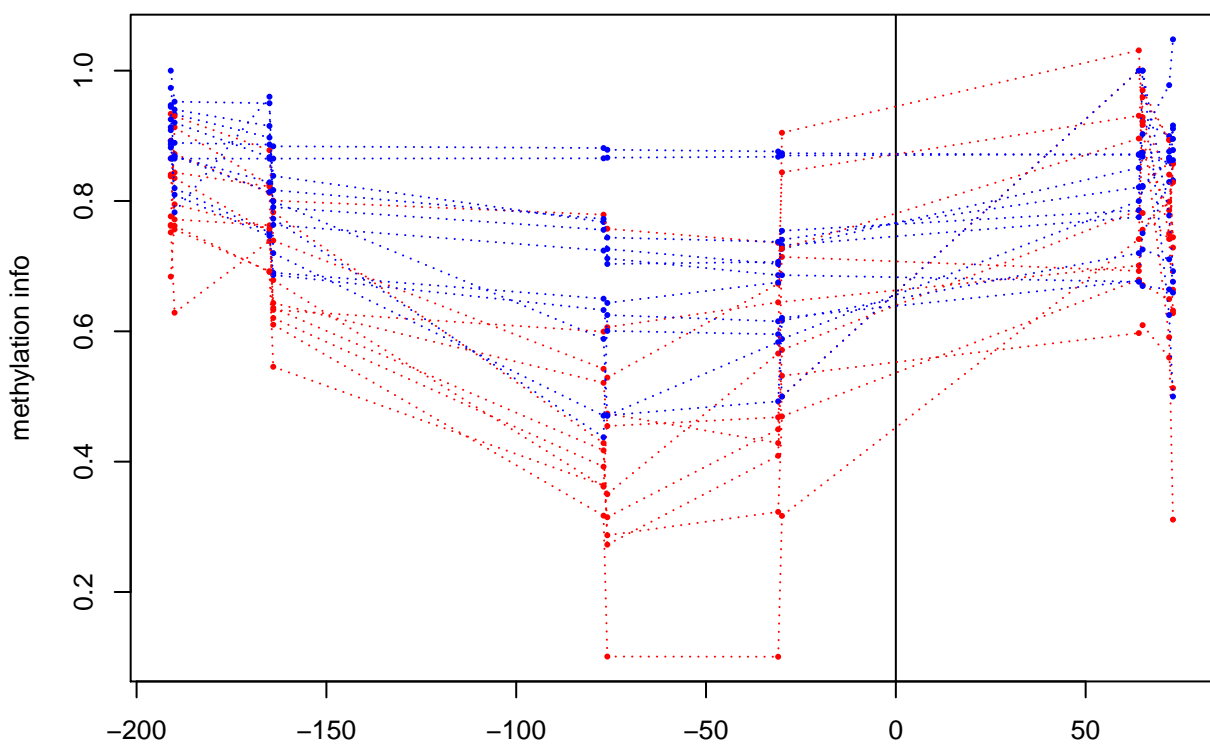

RNAseq logFC(UC-N)= 3.75

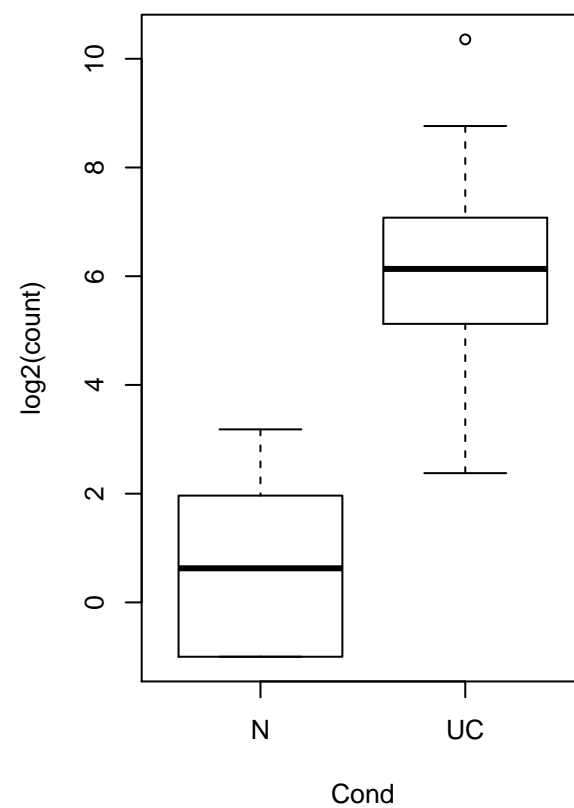



DEFB1 average UC-N %methylation max=6.91% min=4.46%

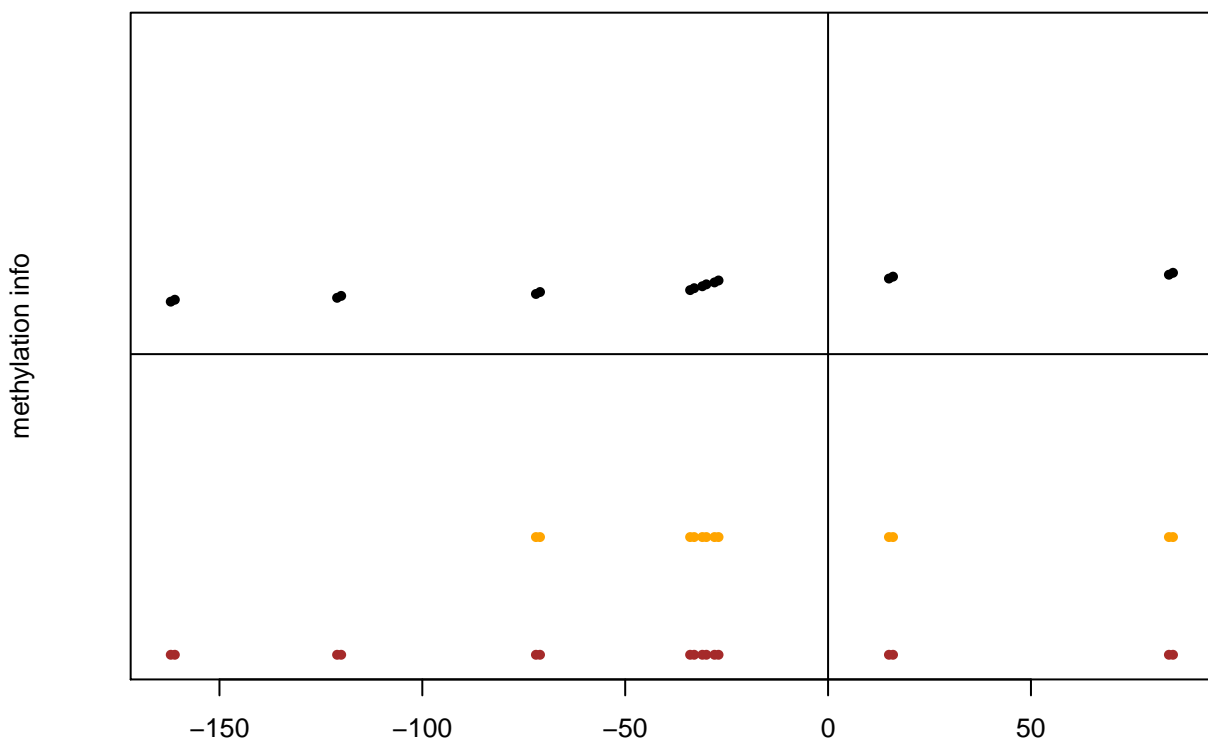

DEFB1 raw %methylation, red=UC, blue=Normal

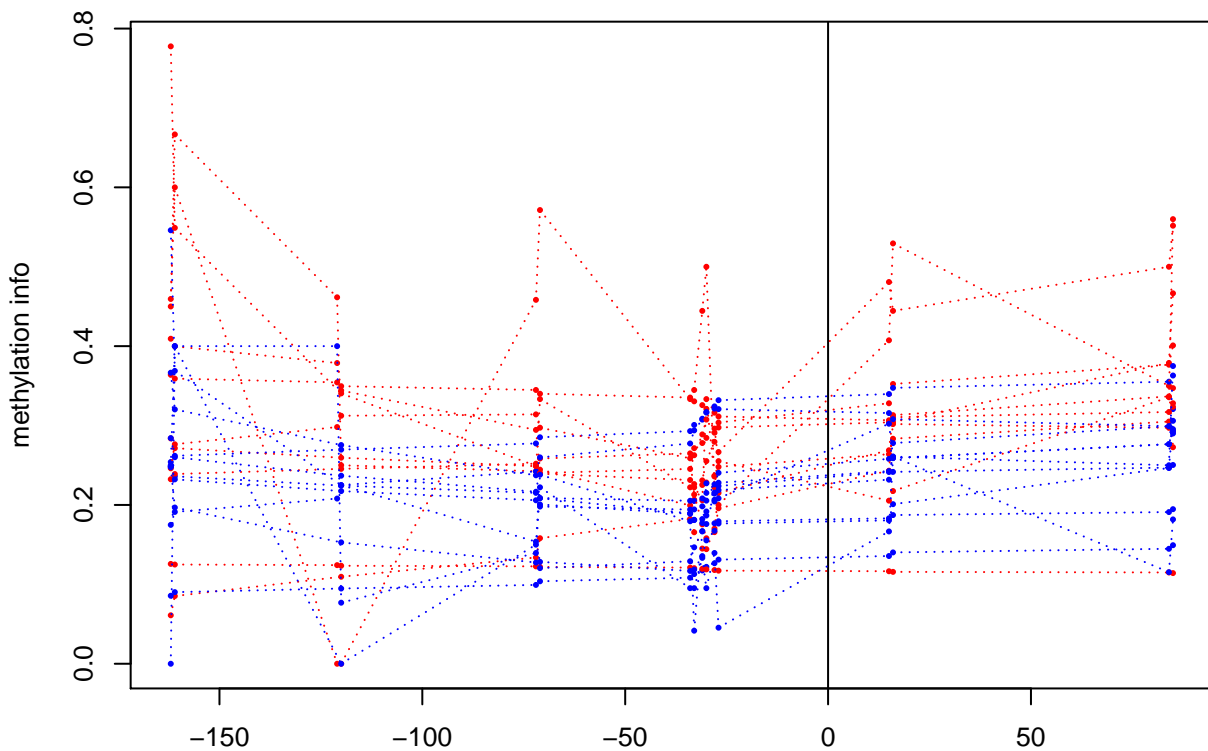

RNAseq logFC(UC-N)= -1.94

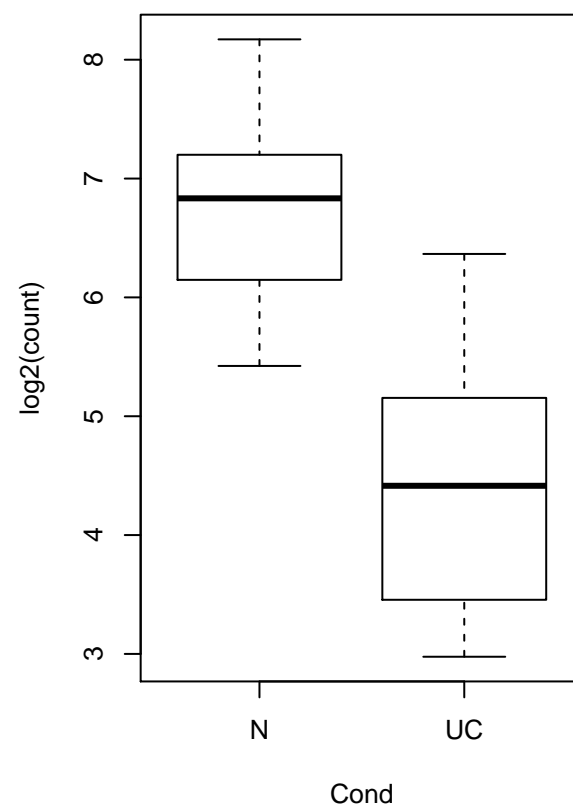

DMBT1 average UC-N %methylation max=-1.27% min=-32.33%

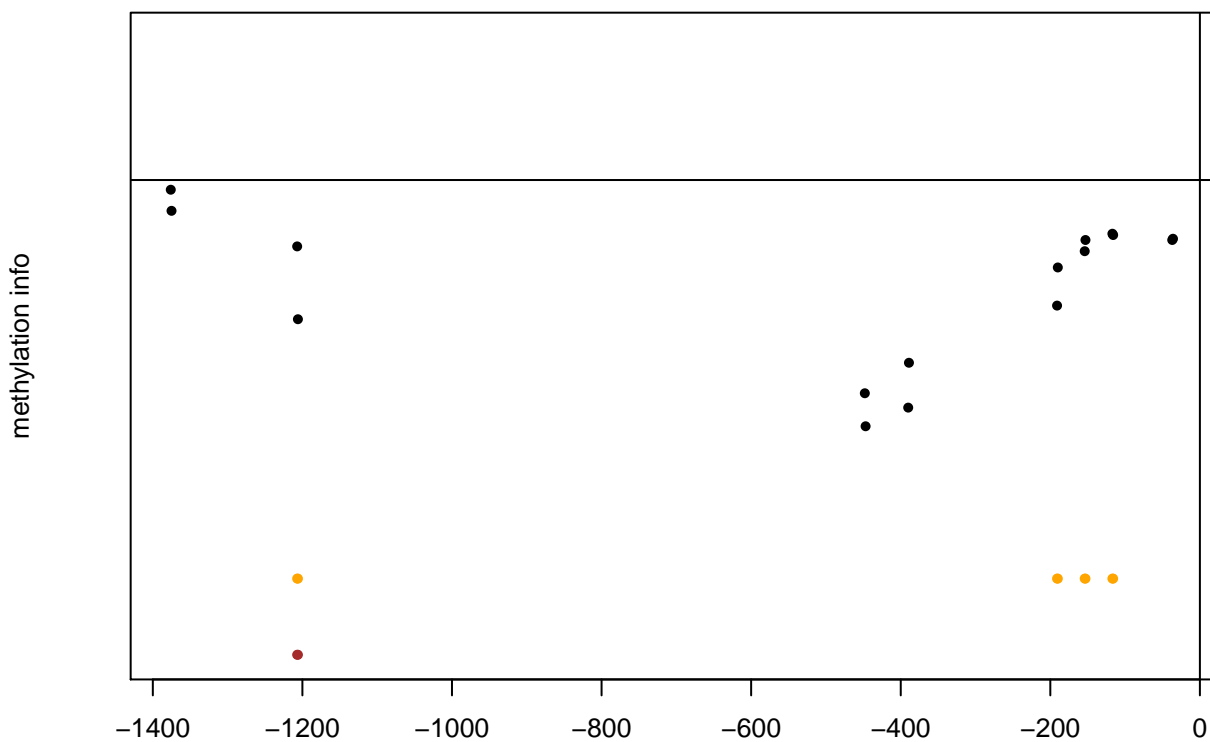

DMBT1 raw %methylation, red=UC, blue=Normal

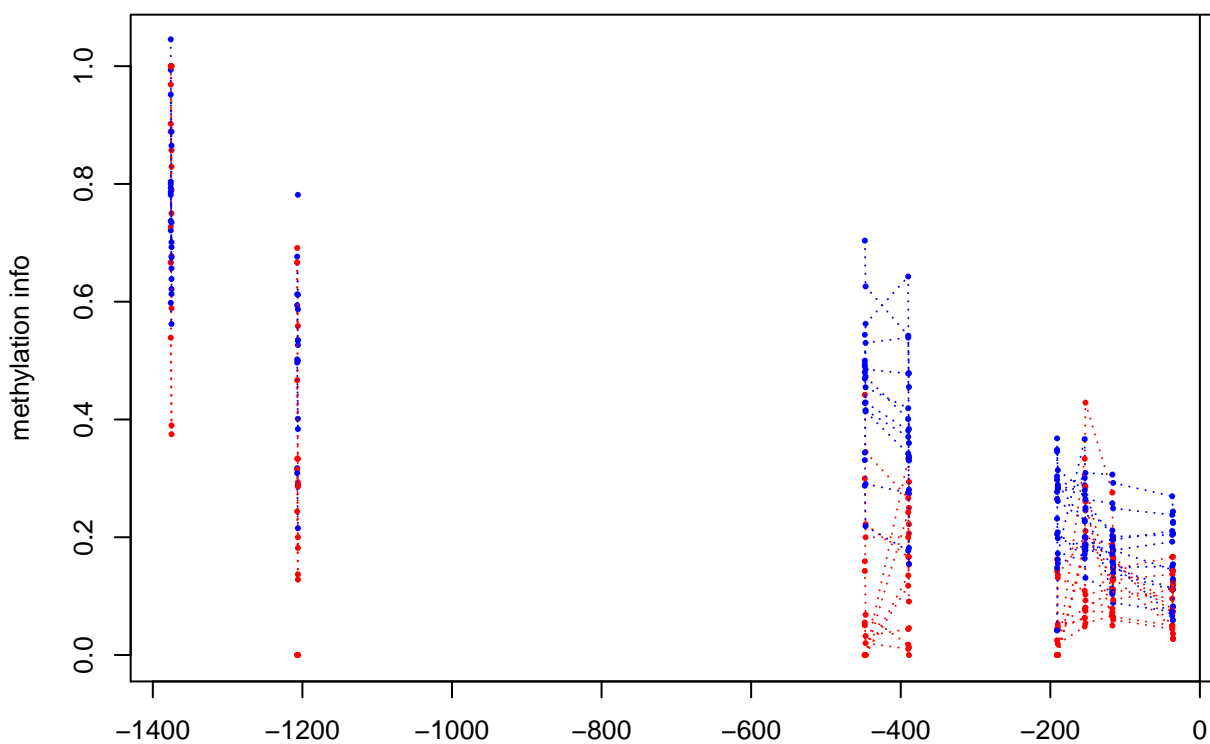

RNAseq logFC(UC-N)= 3.49

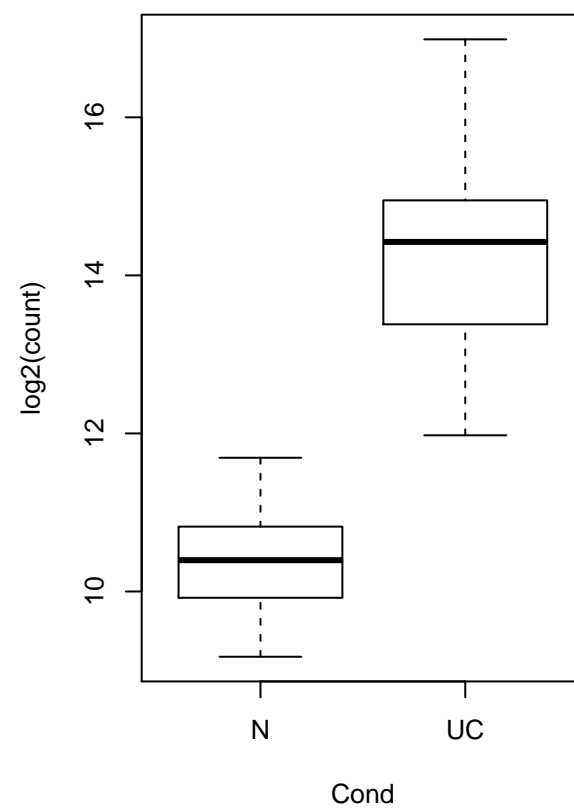

DNMBP-AS1 average UC-N %methylation max=19.78% min=1.32%

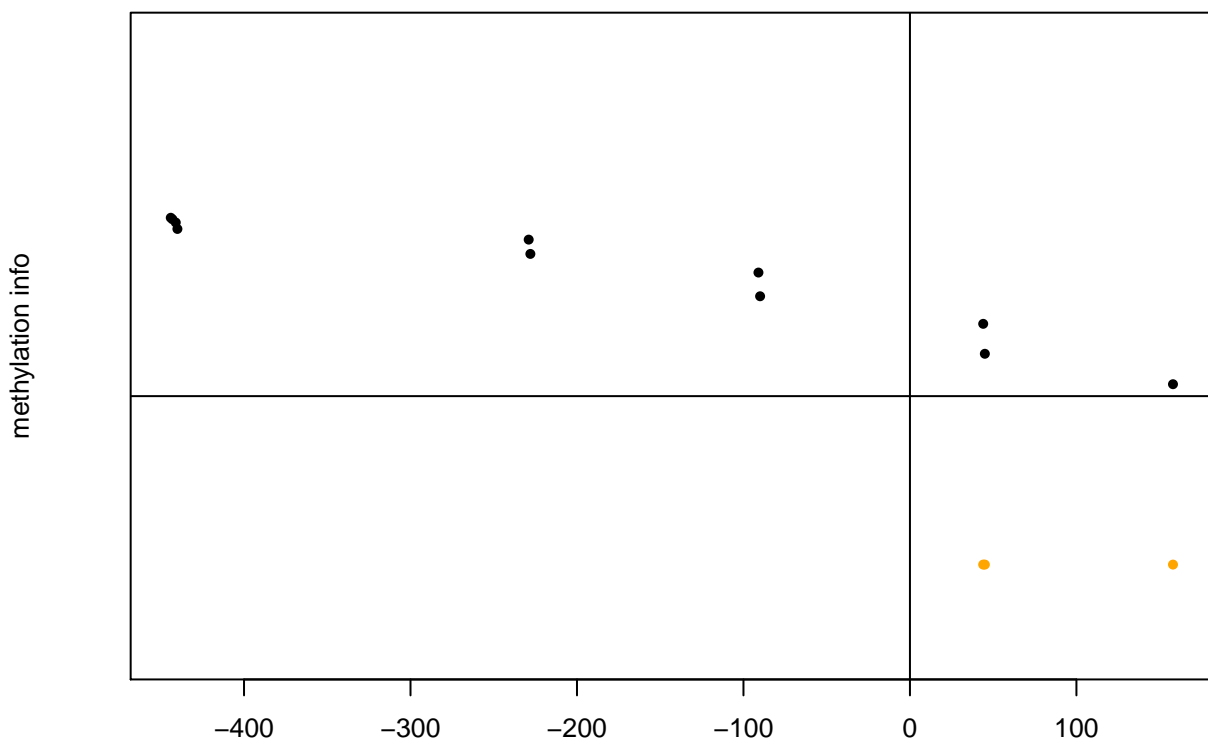

DNMBP-AS1 raw %methylation, red=UC, blue=Normal

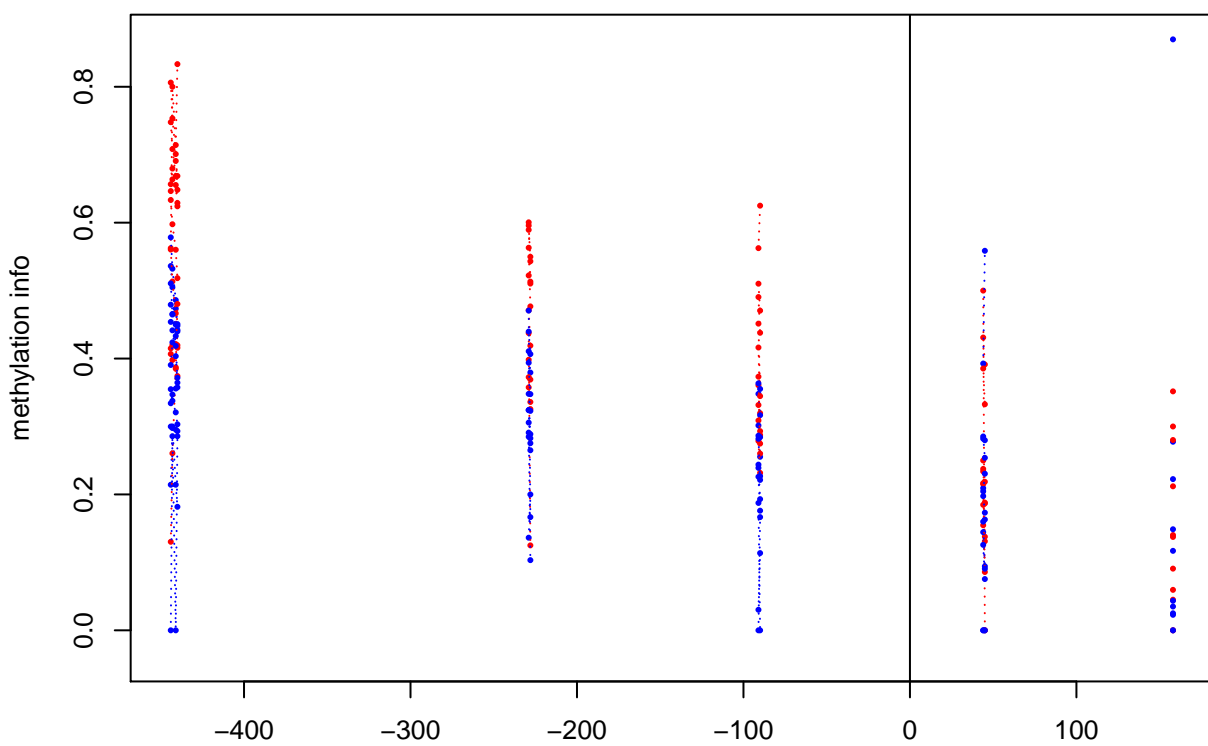

RNAseq logFC(UC-N)= -1.12

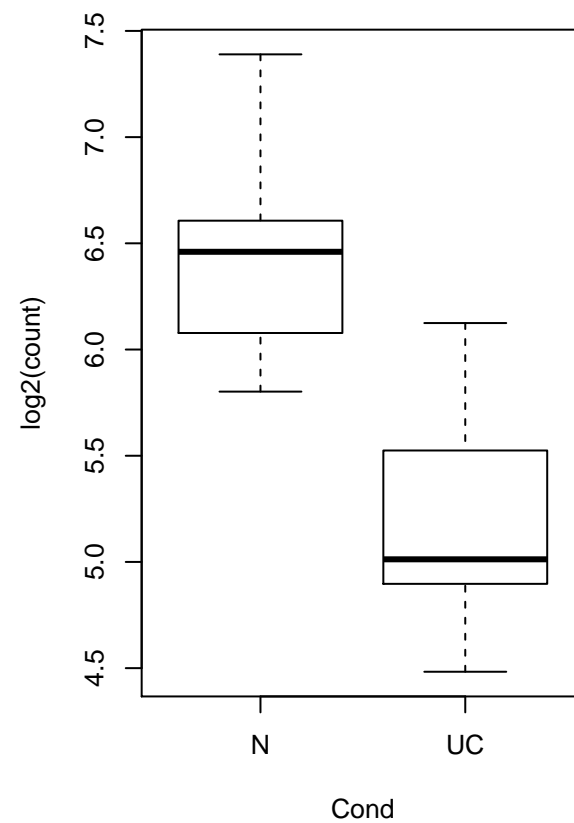

DOK3 average UC-N %methylation max=-13.04% min=-25.87%

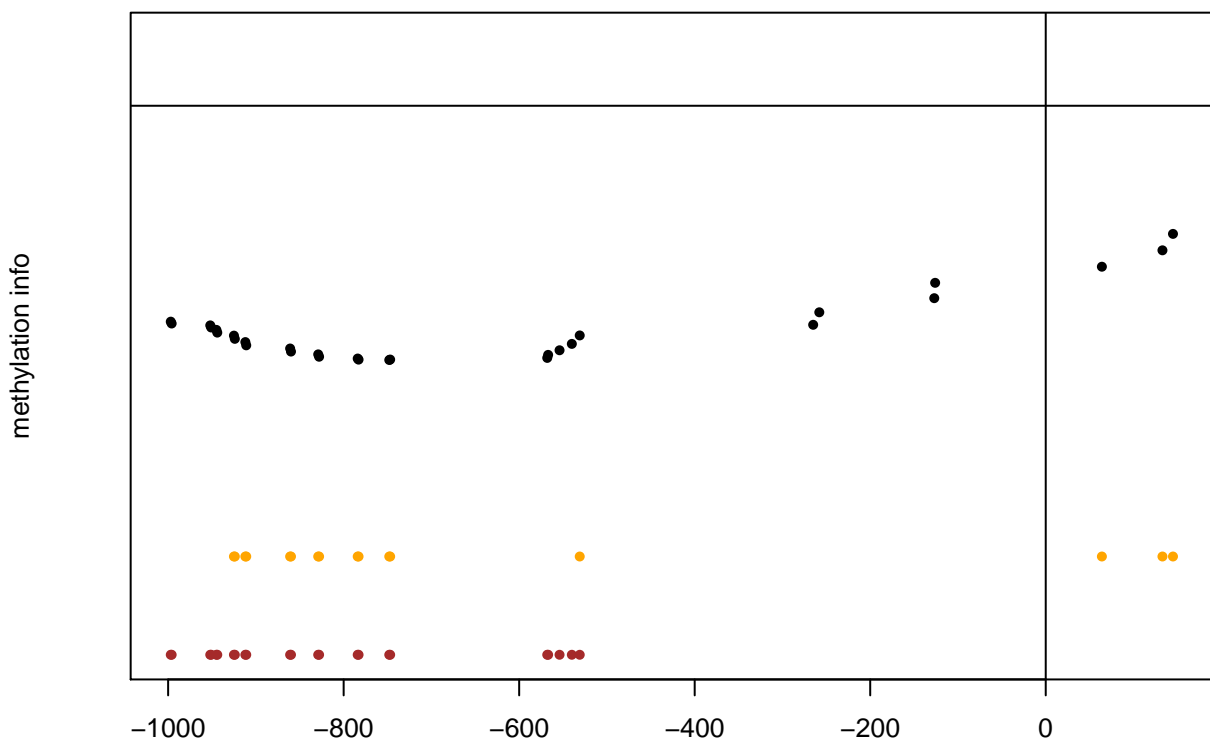

DOK3 raw %methylation, red=UC, blue=Normal

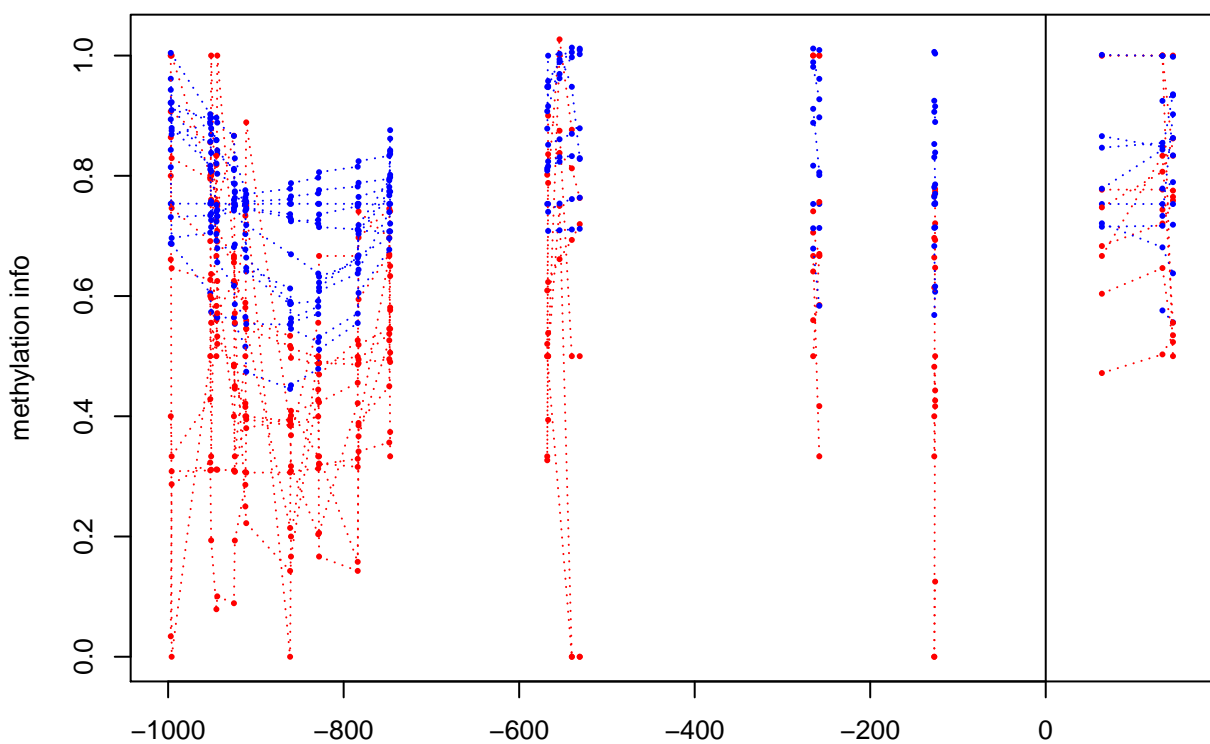

RNAseq logFC(UC-N)= 1.77

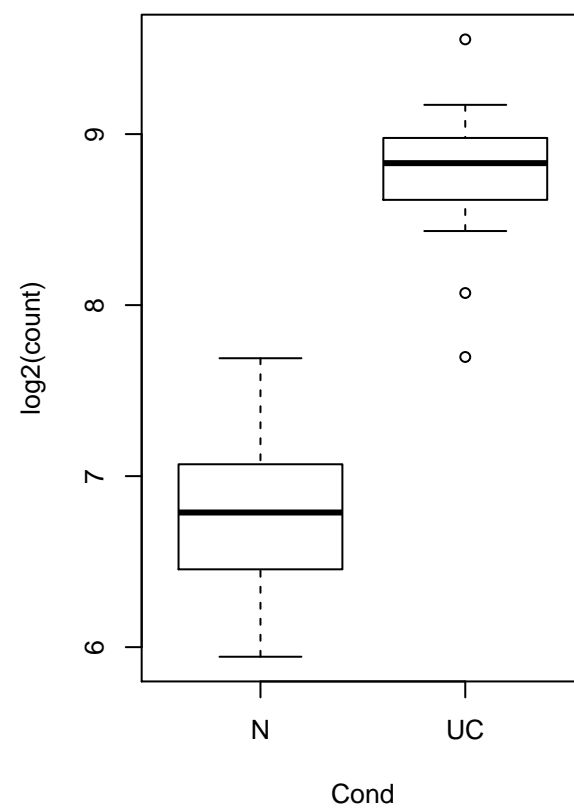

DTHD1 average UC-N %methylation max=0% min=-16.95%

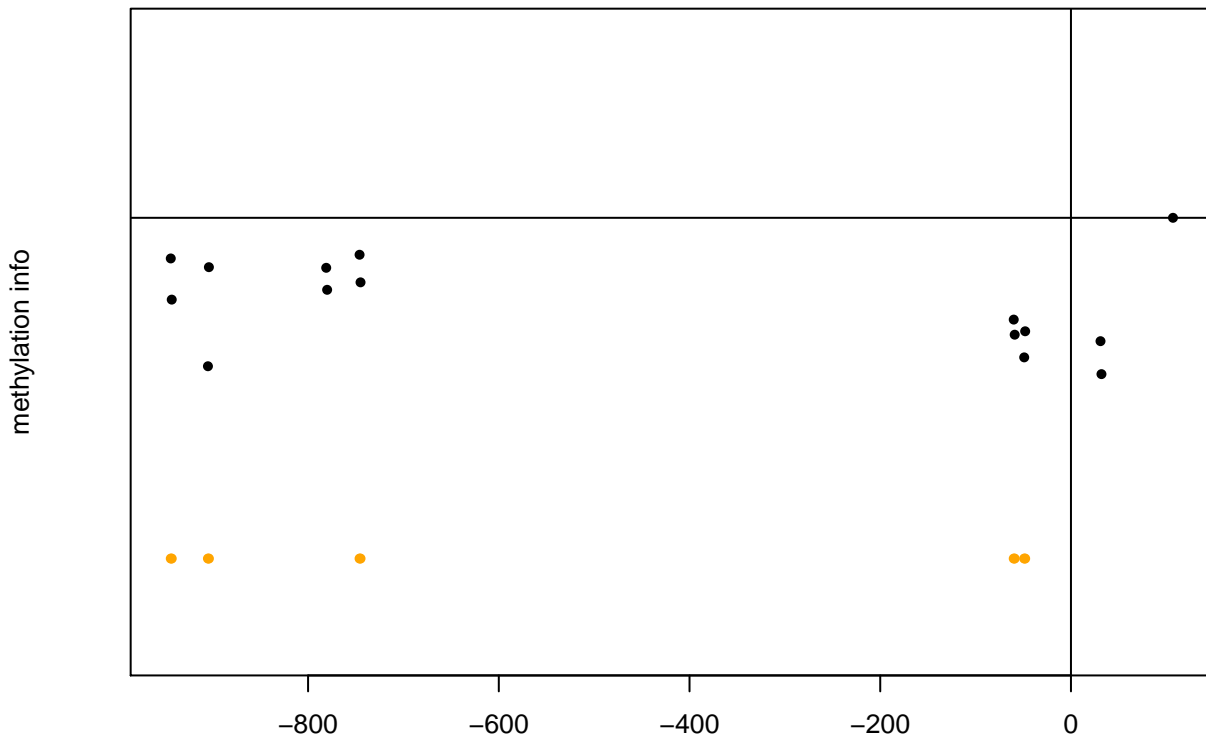

DTHD1 raw %methylation, red=UC, blue=Normal

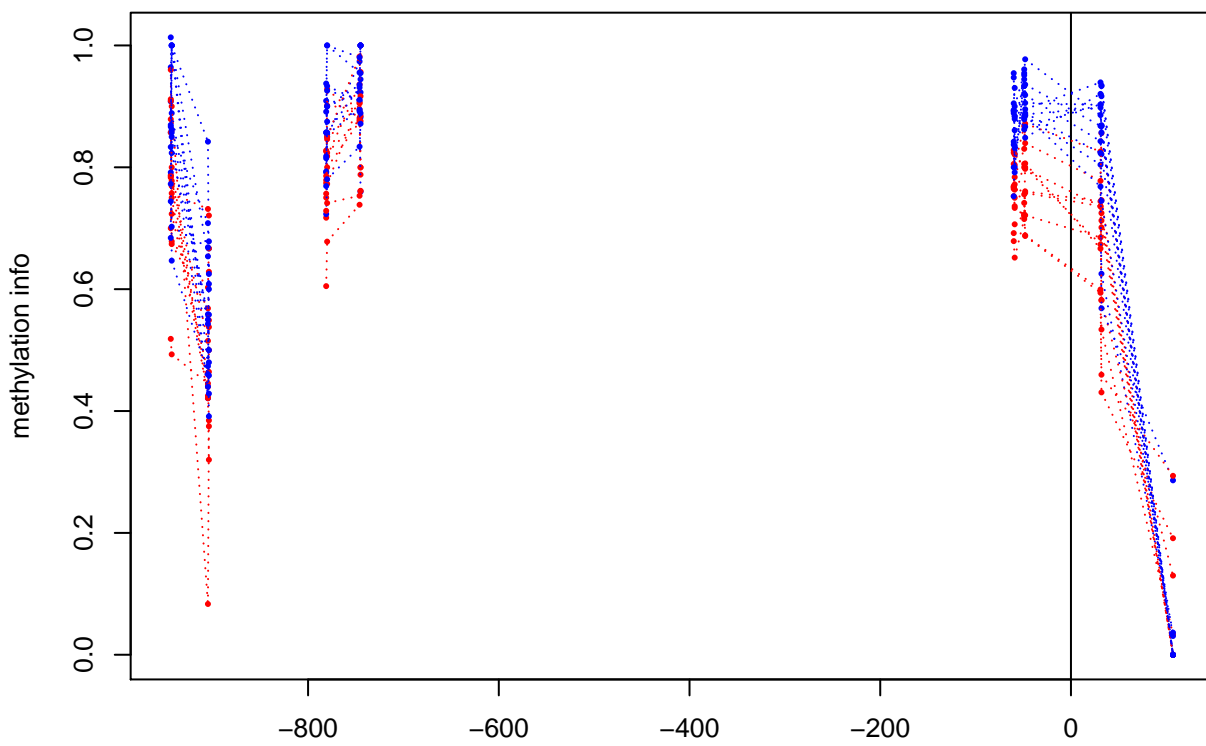

RNAseq logFC(UC-N)= 1.65

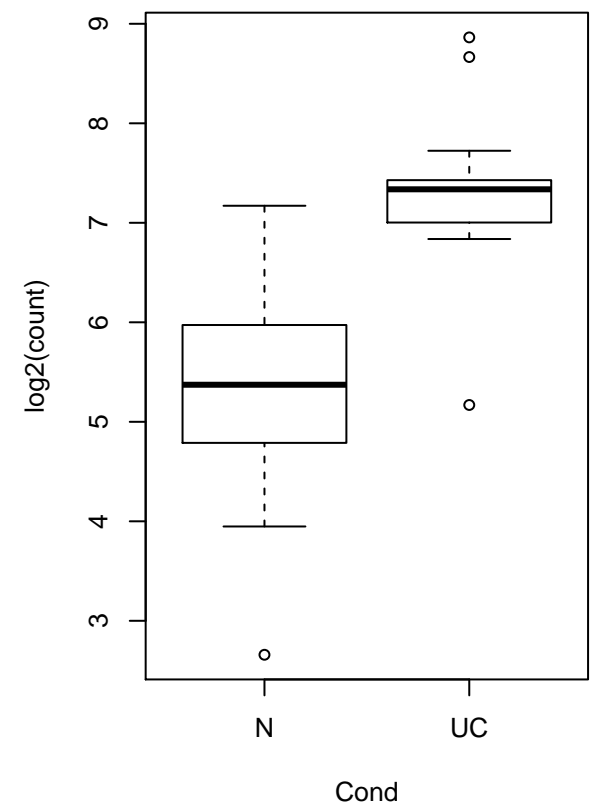

DYRK3 average UC-N %methylation max=16.21% min=-25.65%

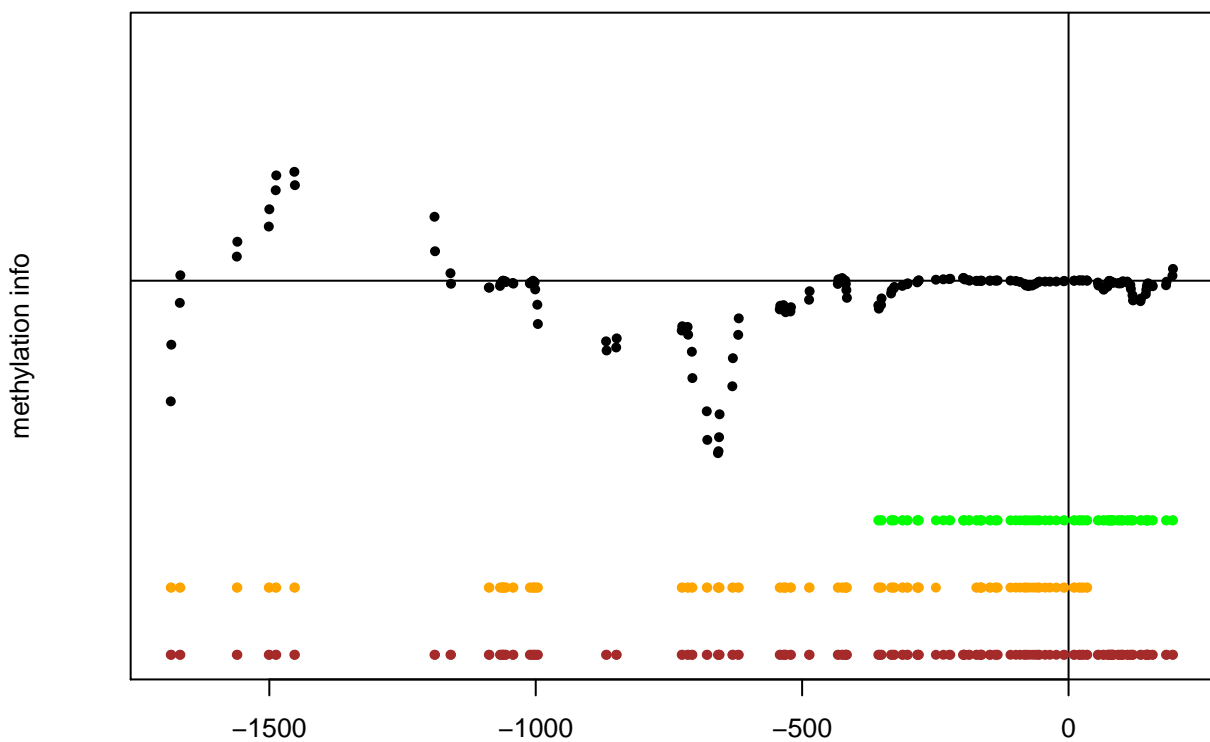

DYRK3 raw %methylation, red=UC, blue=Normal

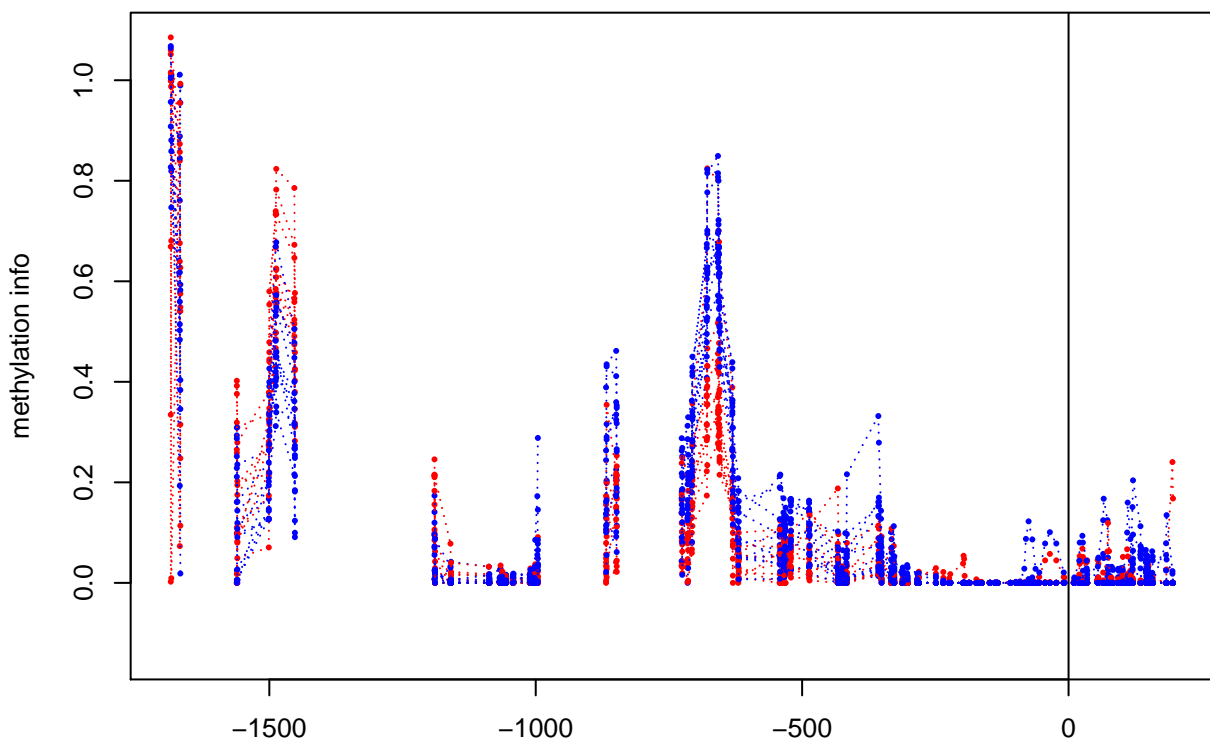

RNAseq logFC(UC-N)= 1.08

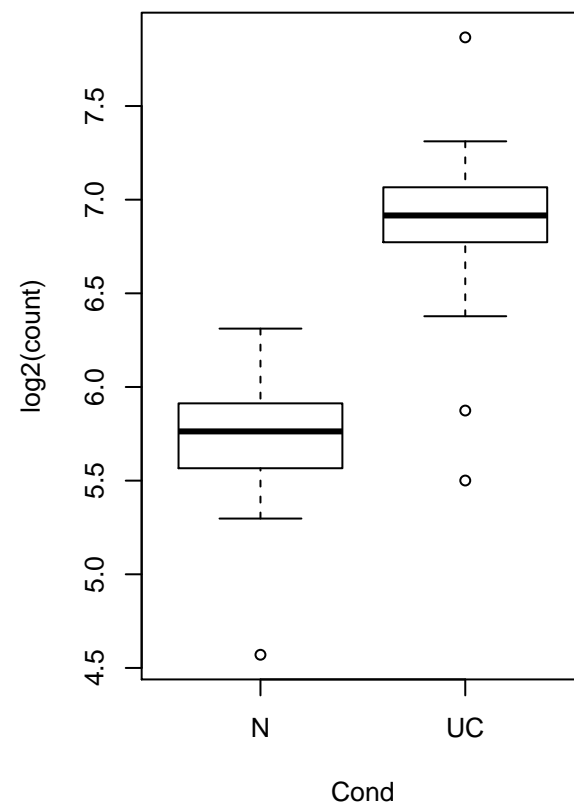

ELOVL5 average UC-N %methylation max=-0.33% min=-0.75%

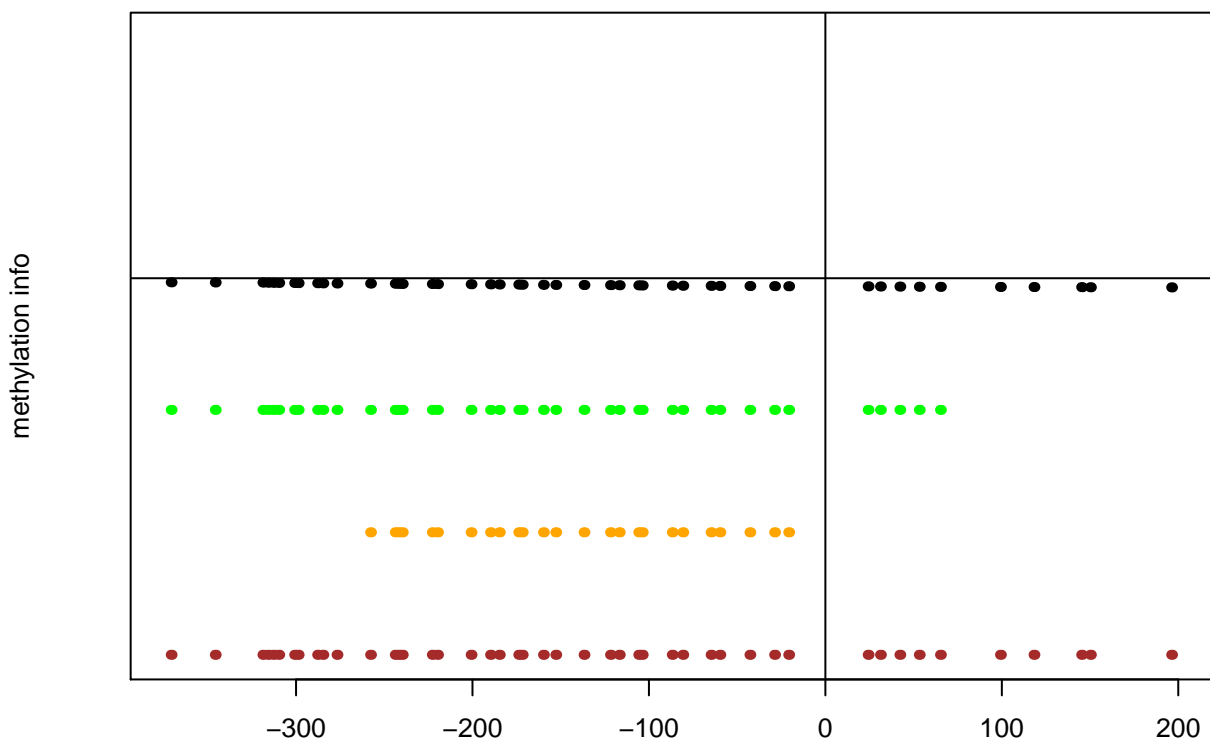

ELOVL5 raw %methylation, red=UC, blue=Normal

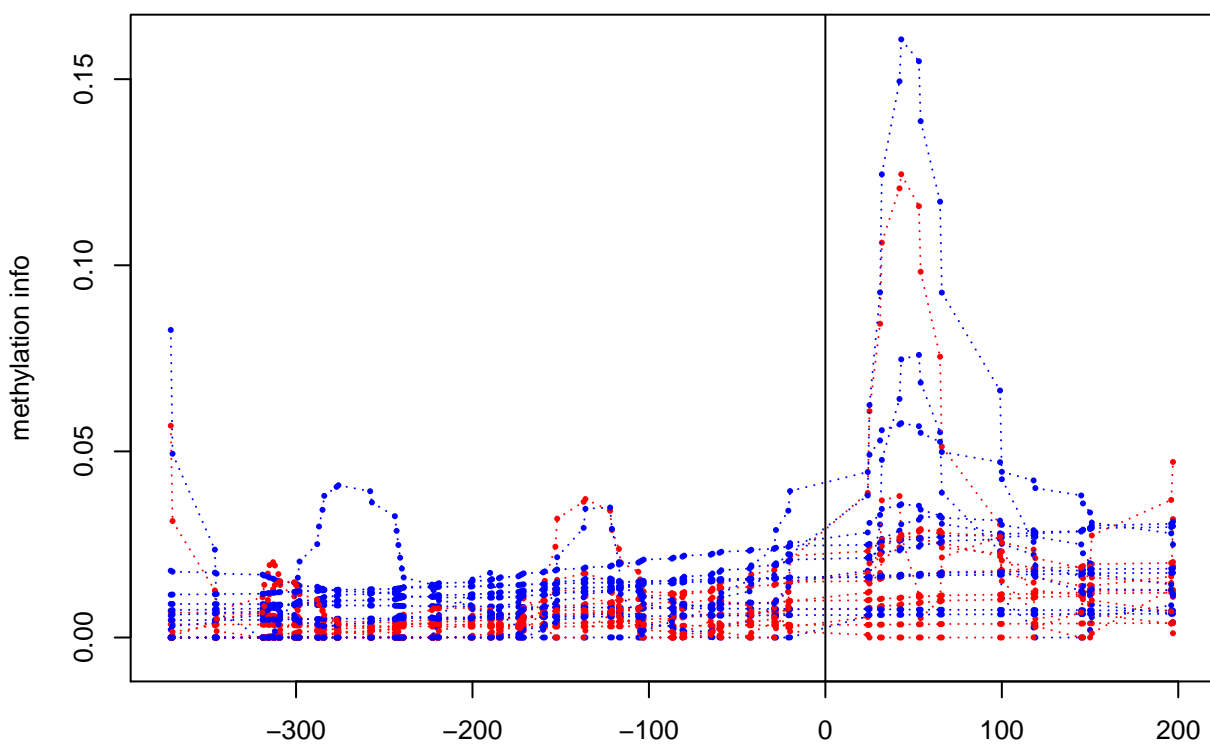

RNAseq logFC(UC-N)= 1.32

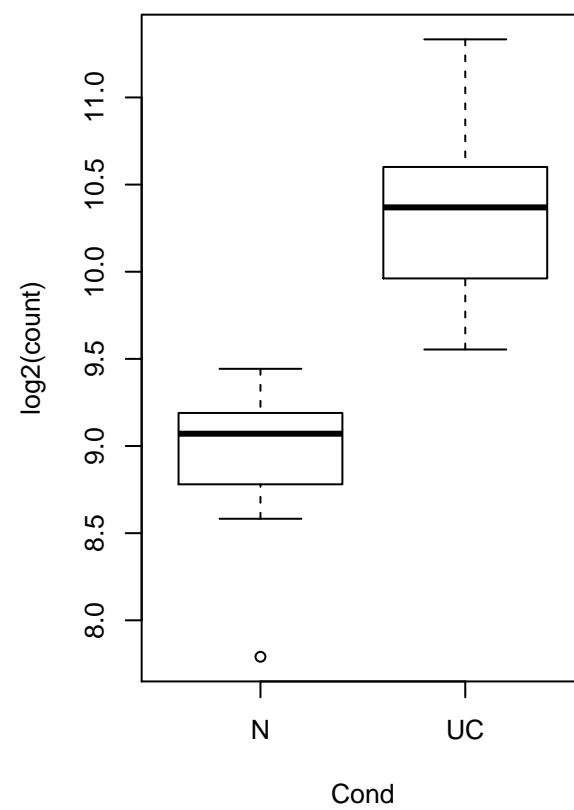

EPHX2 average UC-N %methylation max=18.84% min=-15.19%

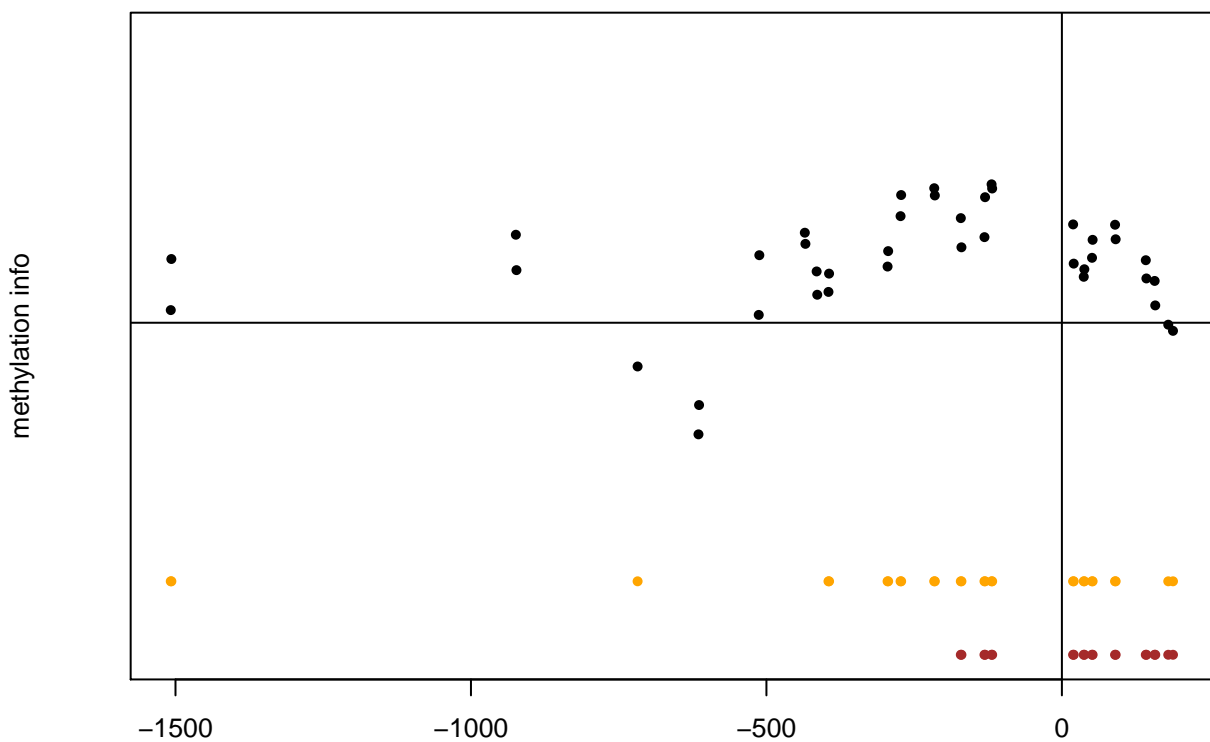

EPHX2 raw %methylation, red=UC, blue=Normal

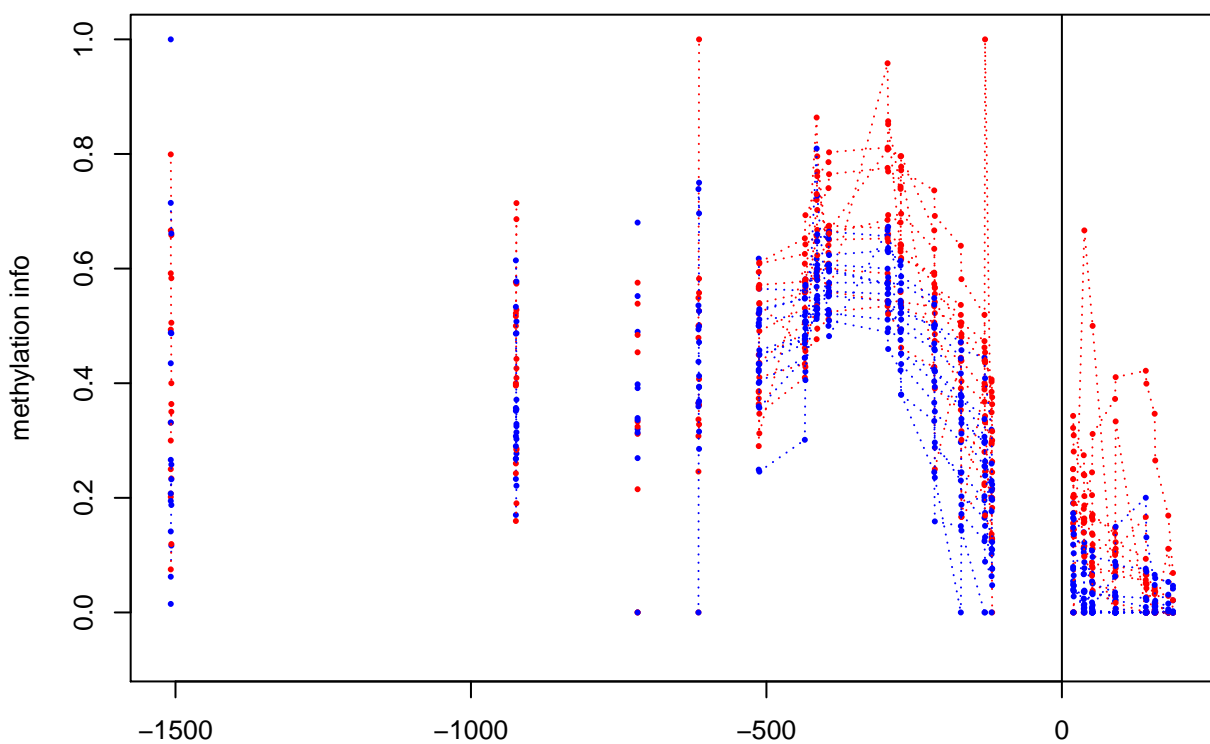

RNAseq logFC(UC-N) = -1.17

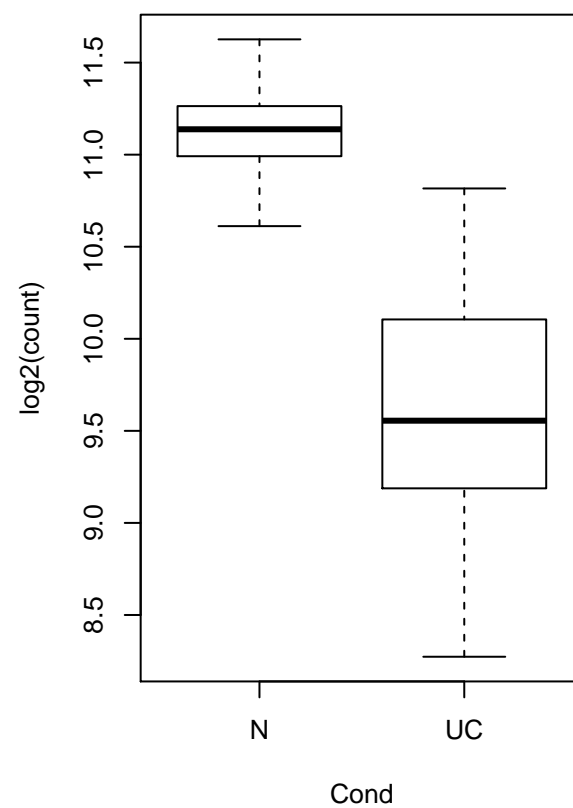



ESPN average UC-N %methylation max=6.25% min=-8.81%

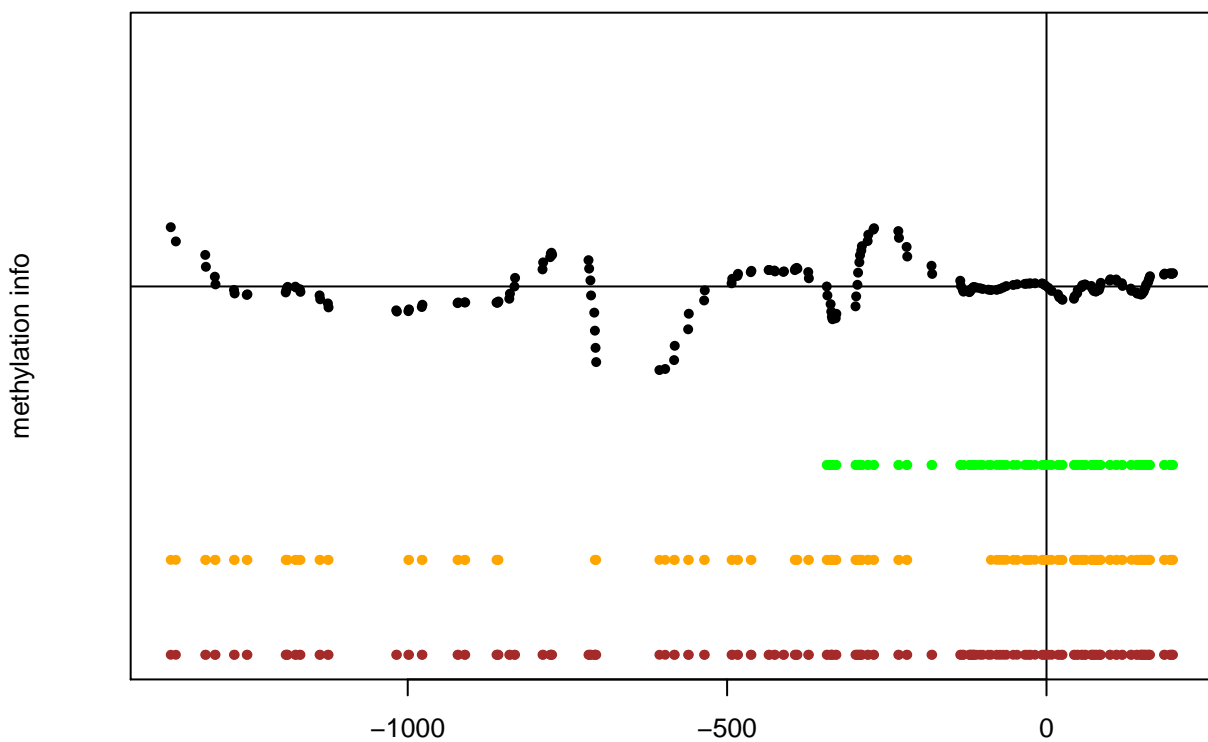

ESPN raw %methylation, red=UC, blue=Normal

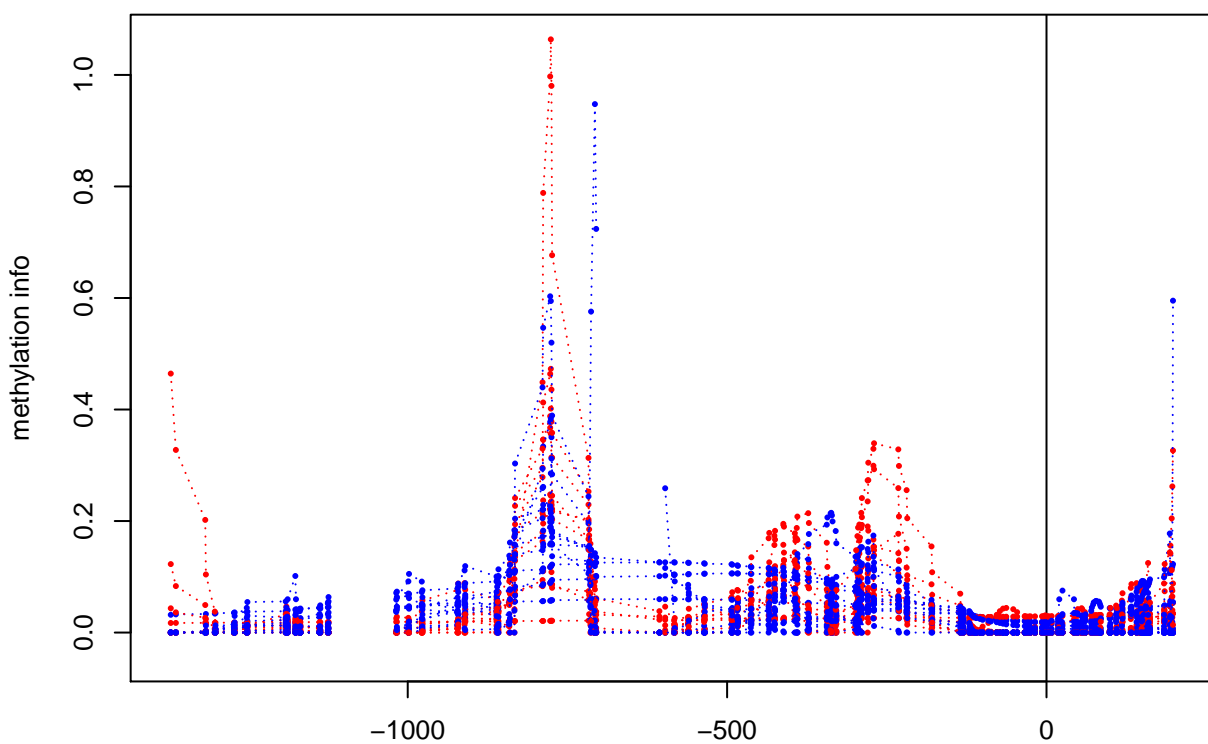

RNAseq logFC(UC-N)= -1.07

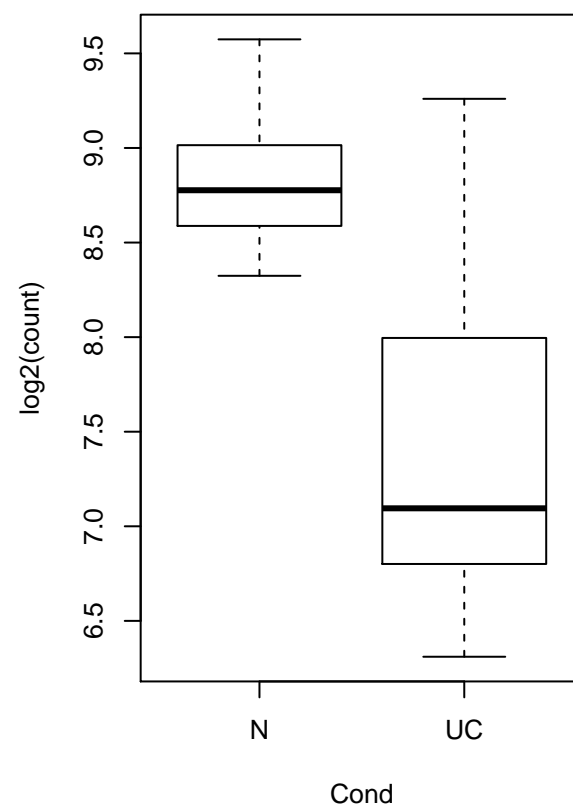

F2R average UC-N %methylation max=3.85% min=-31.35%

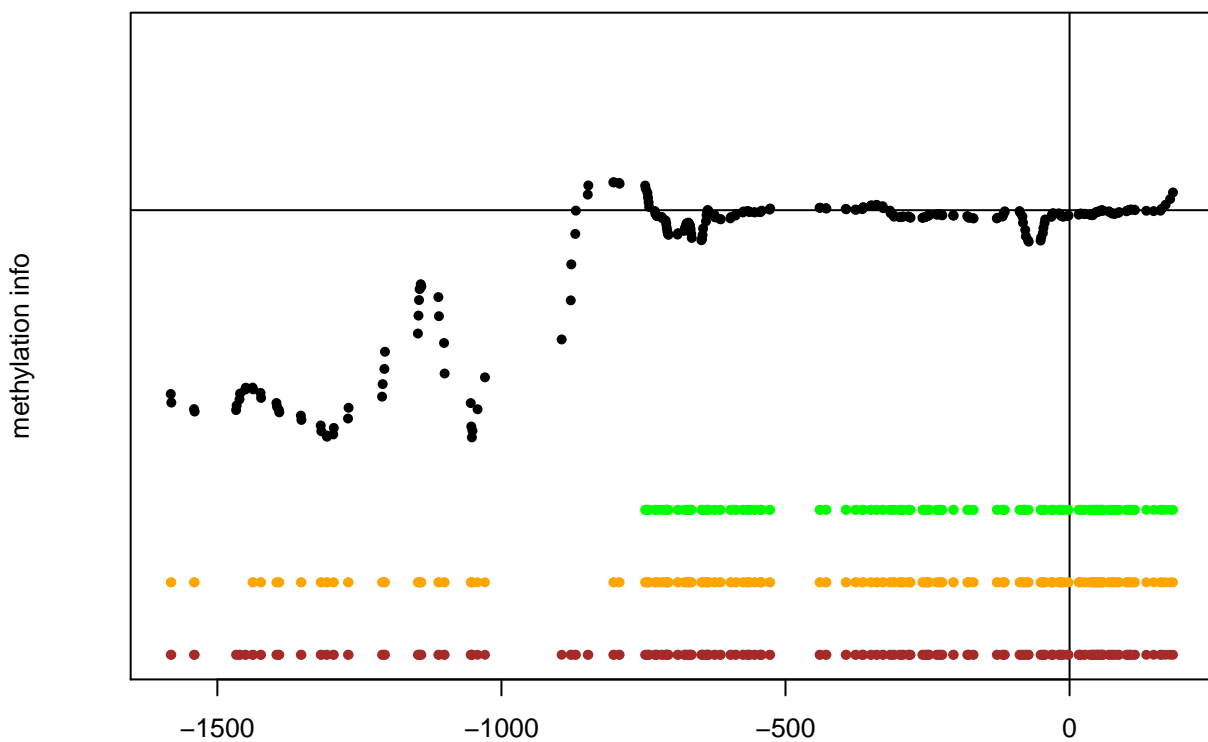

F2R raw %methylation, red=UC, blue=Normal

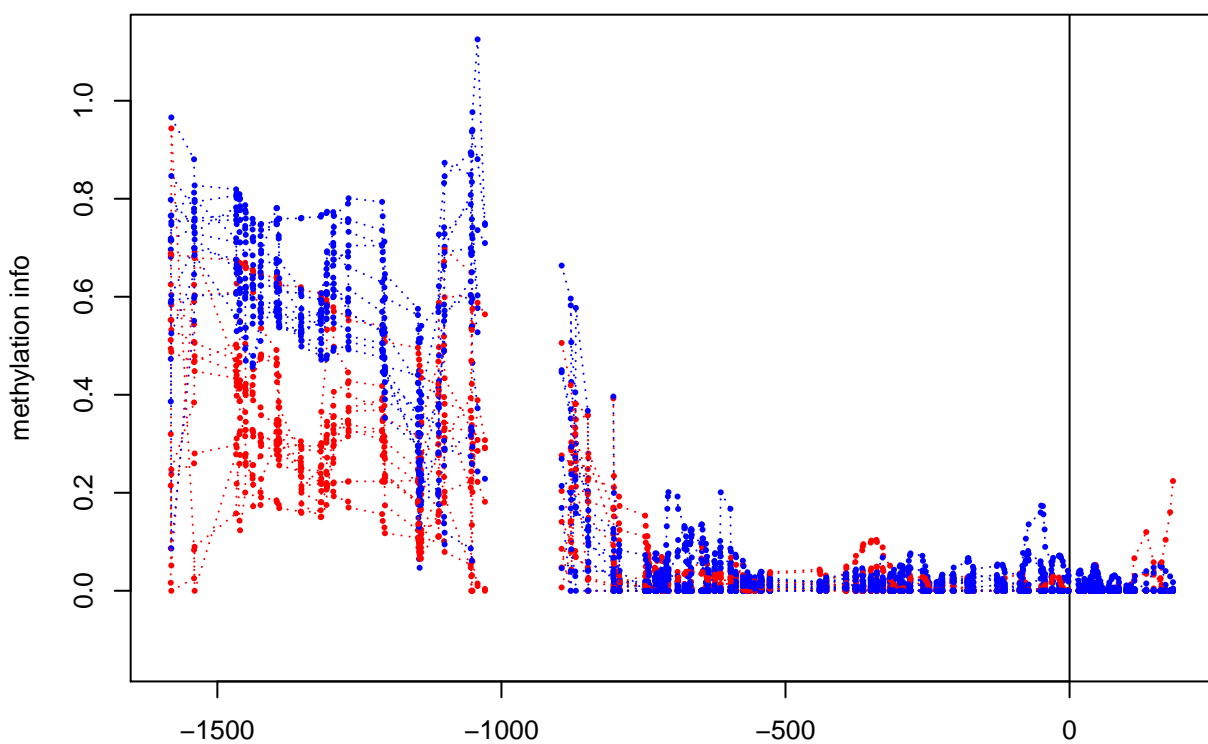

RNAseq logFC(UC-N)= 1.08

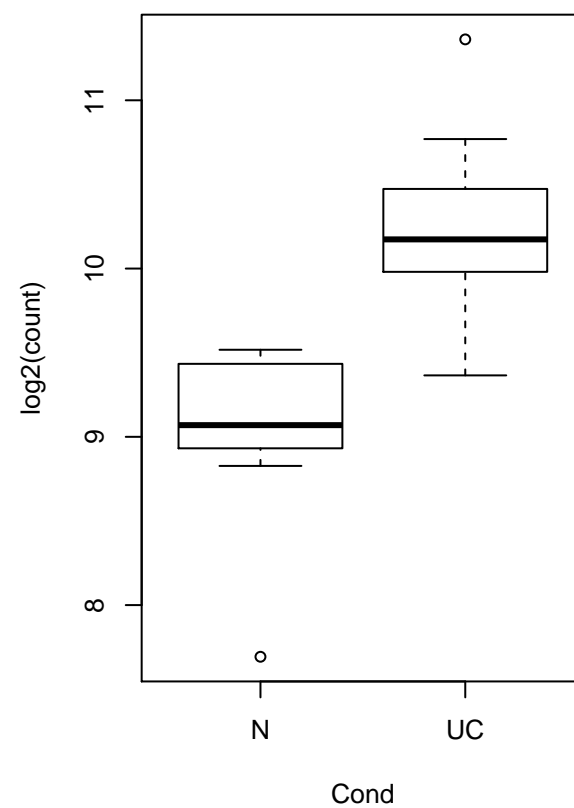

FABP1 average UC-N %methylation max=31.39% min=8.7%

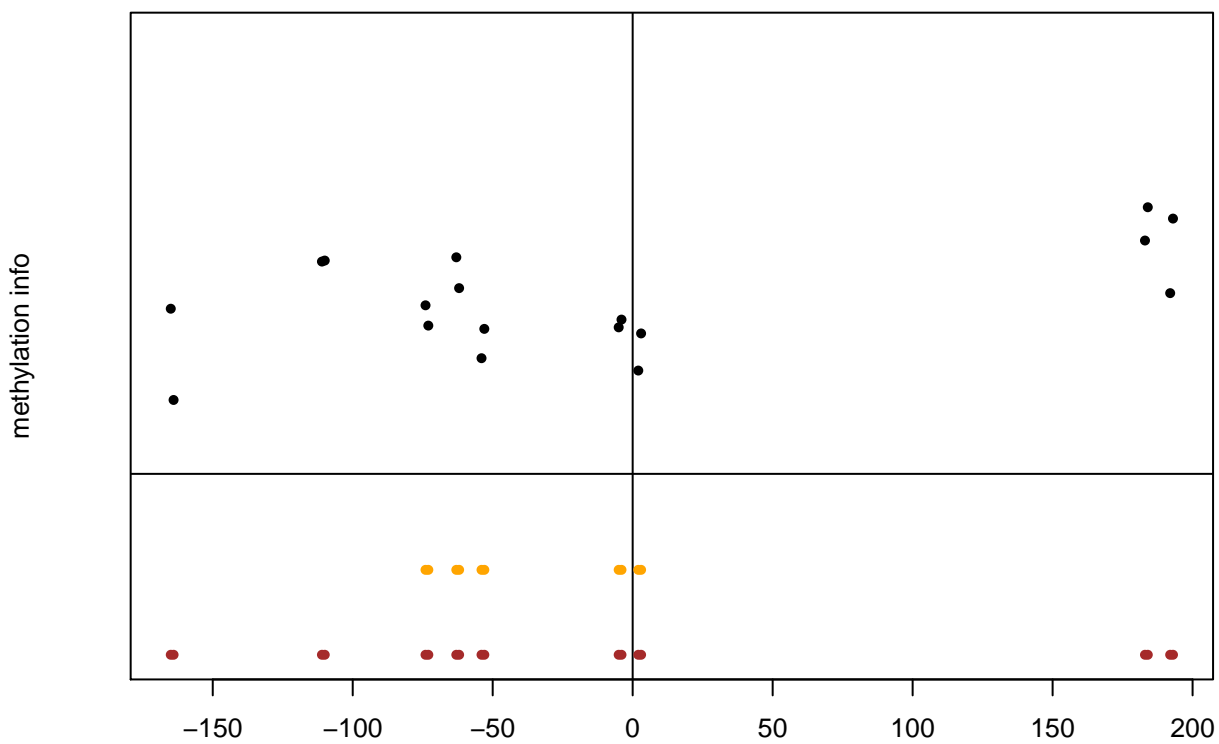

FABP1 raw %methylation, red=UC, blue=Normal

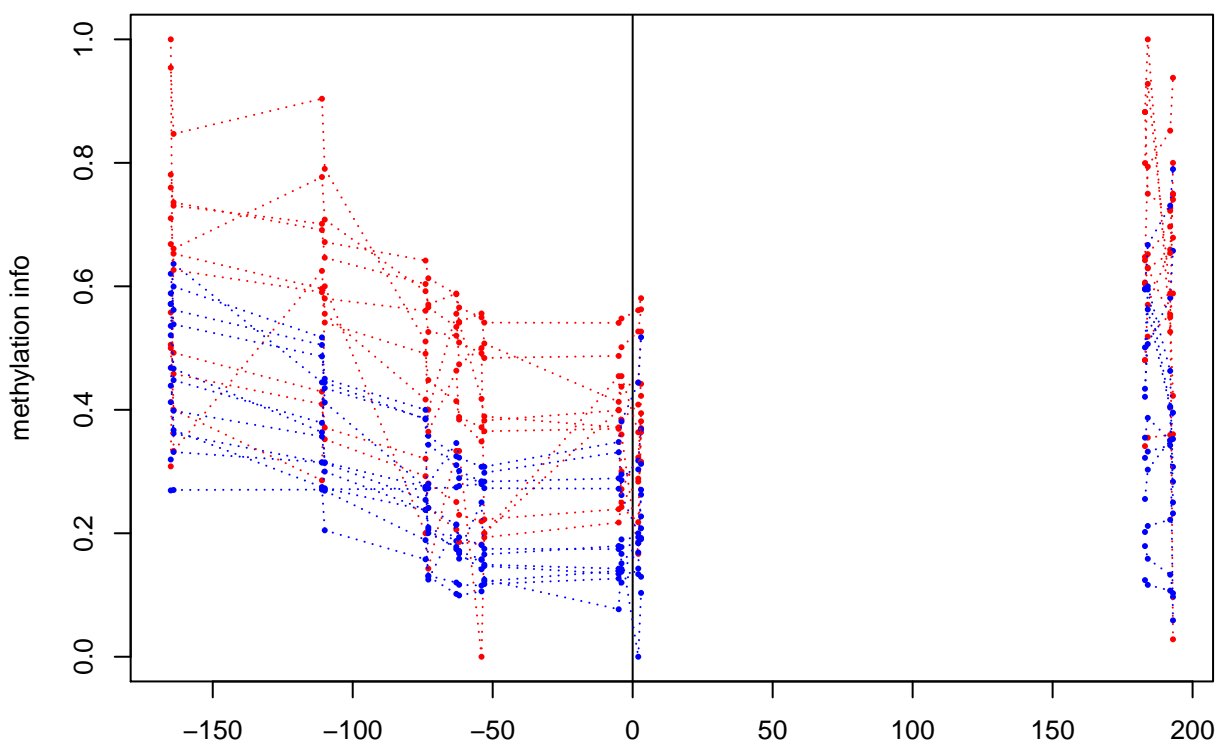

RNAseq logFC(UC-N)= -1.66

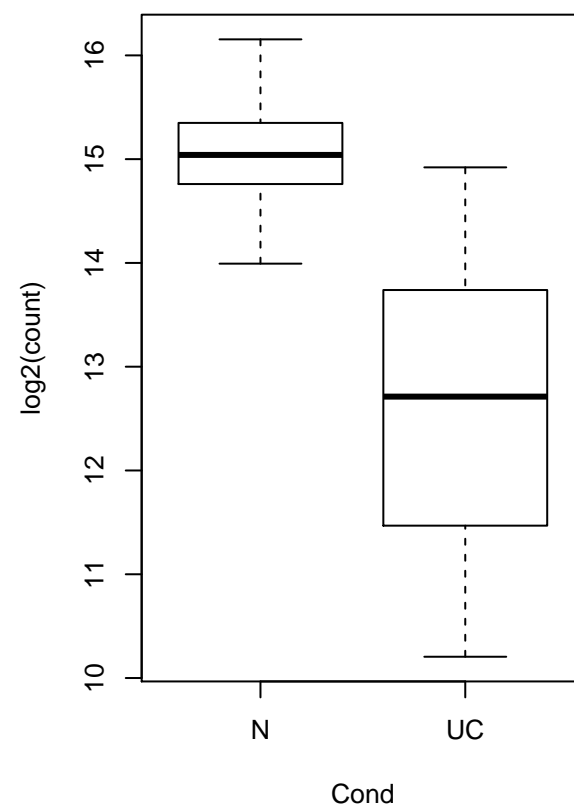

FADS1 average UC-N %methylation max=-4.86% min=-21.91%

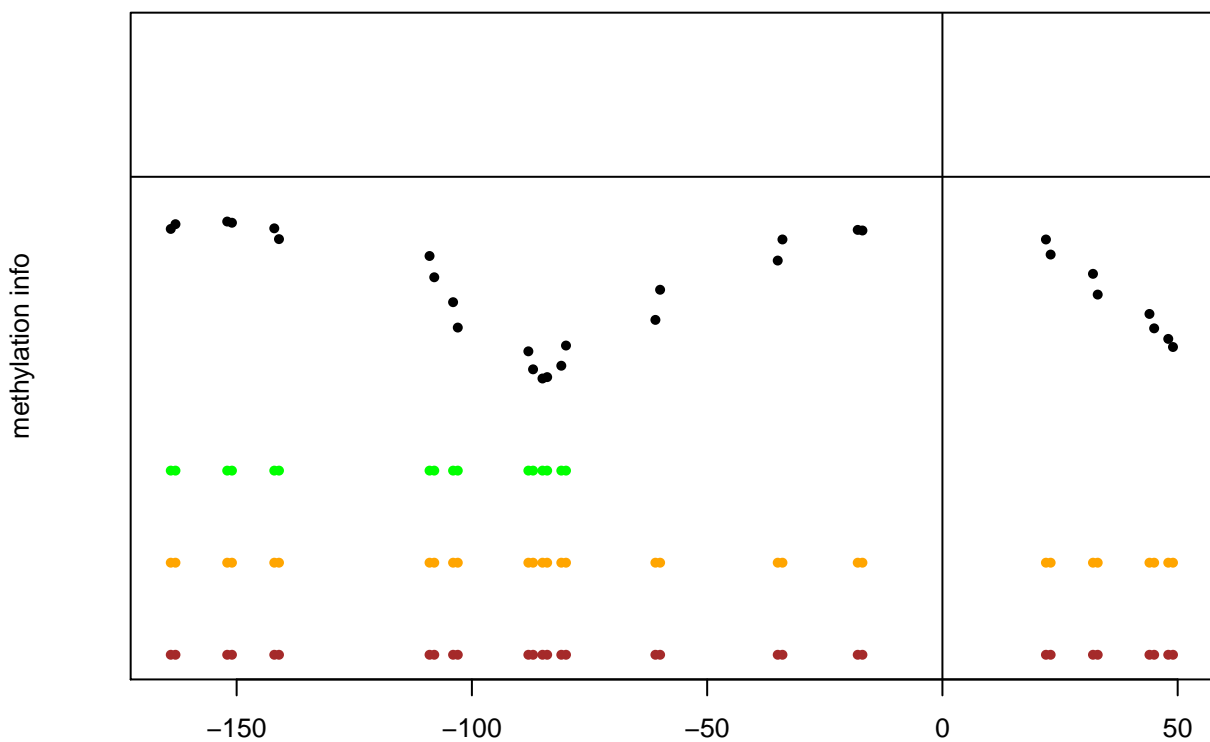

FADS1 raw %methylation, red=UC, blue=Normal

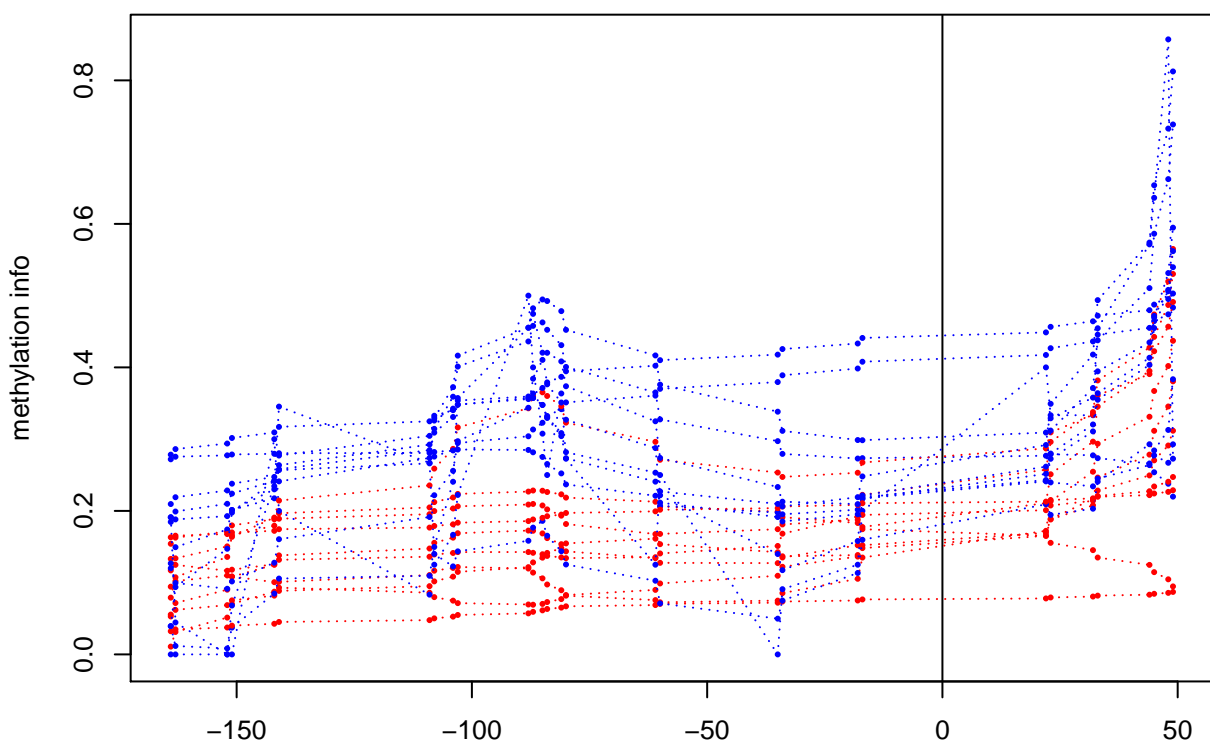

RNAseq logFC(UC-N)= 1.3

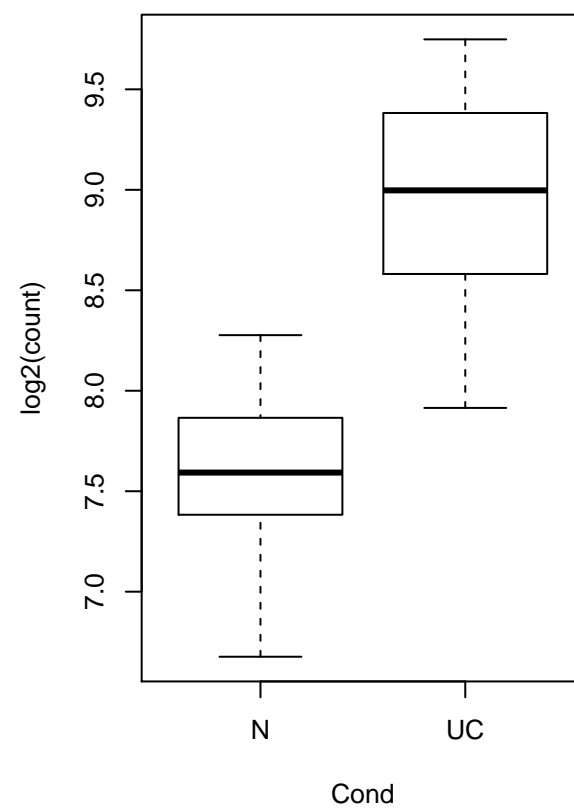

FAM129C average UC-N %methylation max=9.54% min=-30.11%

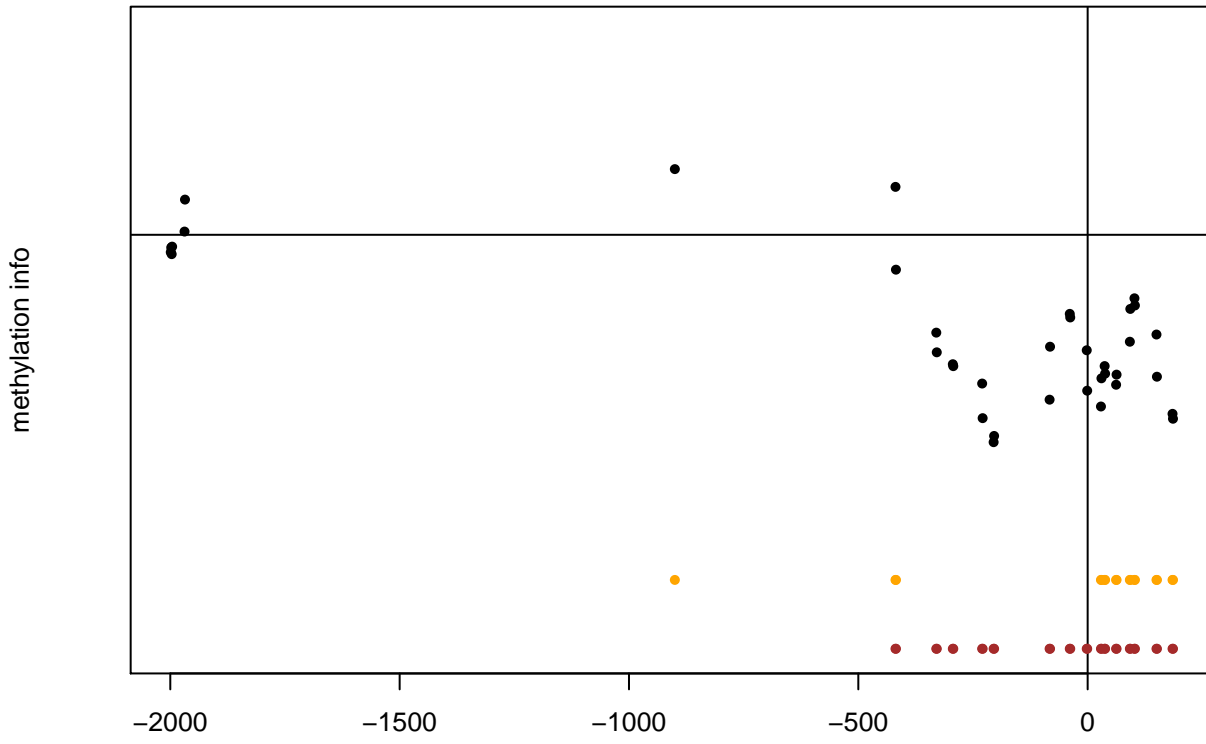

FAM129C raw %methylation, red=UC, blue=Normal

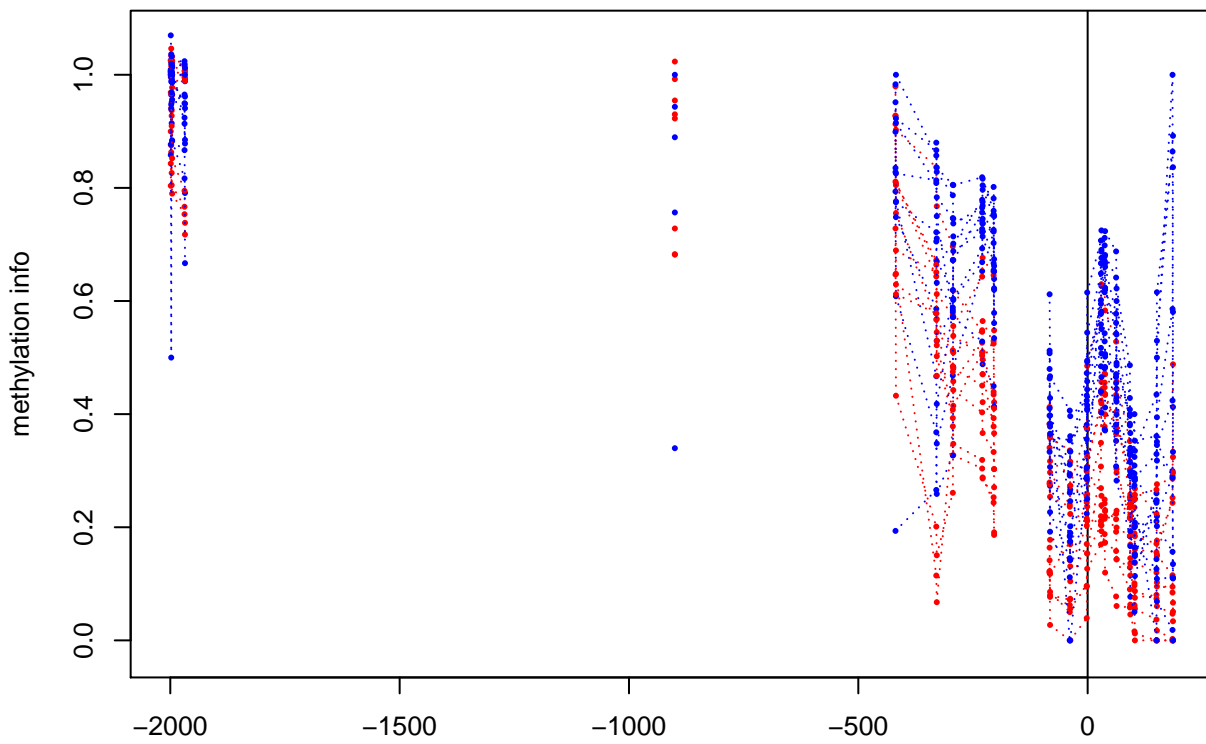

RNAseq logFC(UC-N)= 2.14

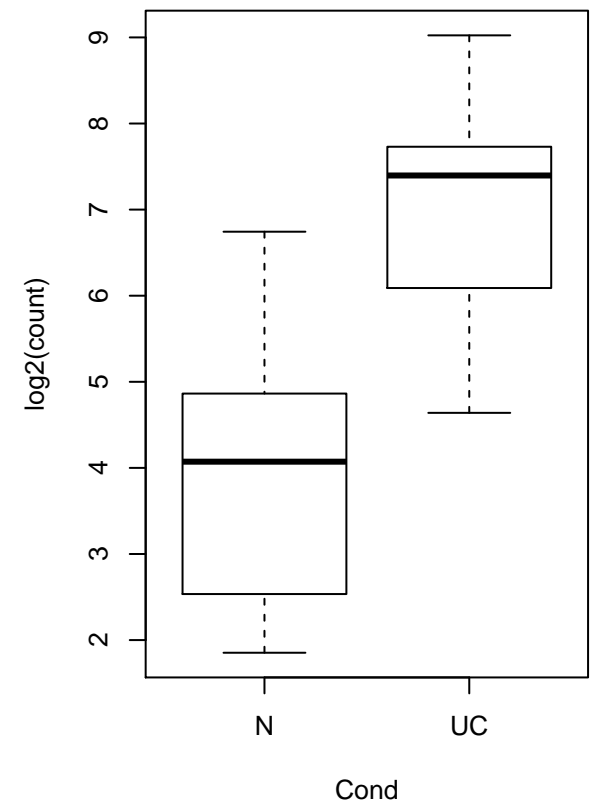

FAM151A average UC-N %methylation max=19.37% min=-31.9%

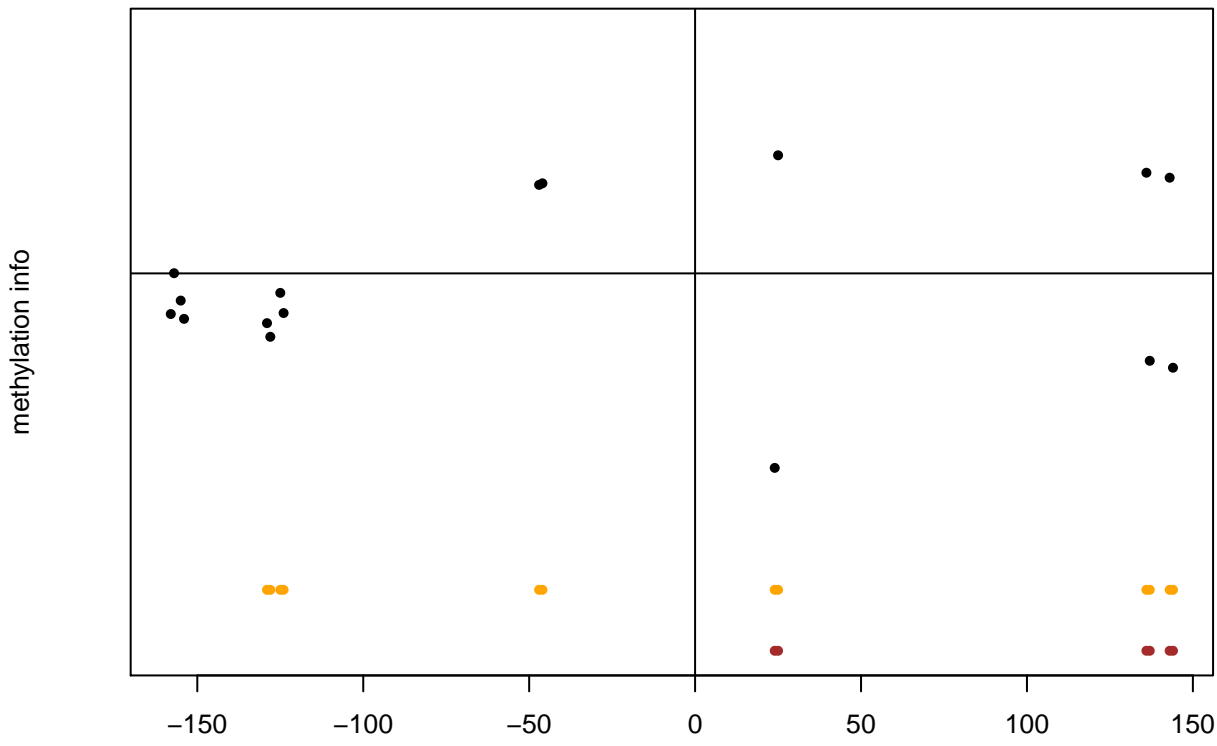

FAM151A raw %methylation, red=UC, blue=Normal

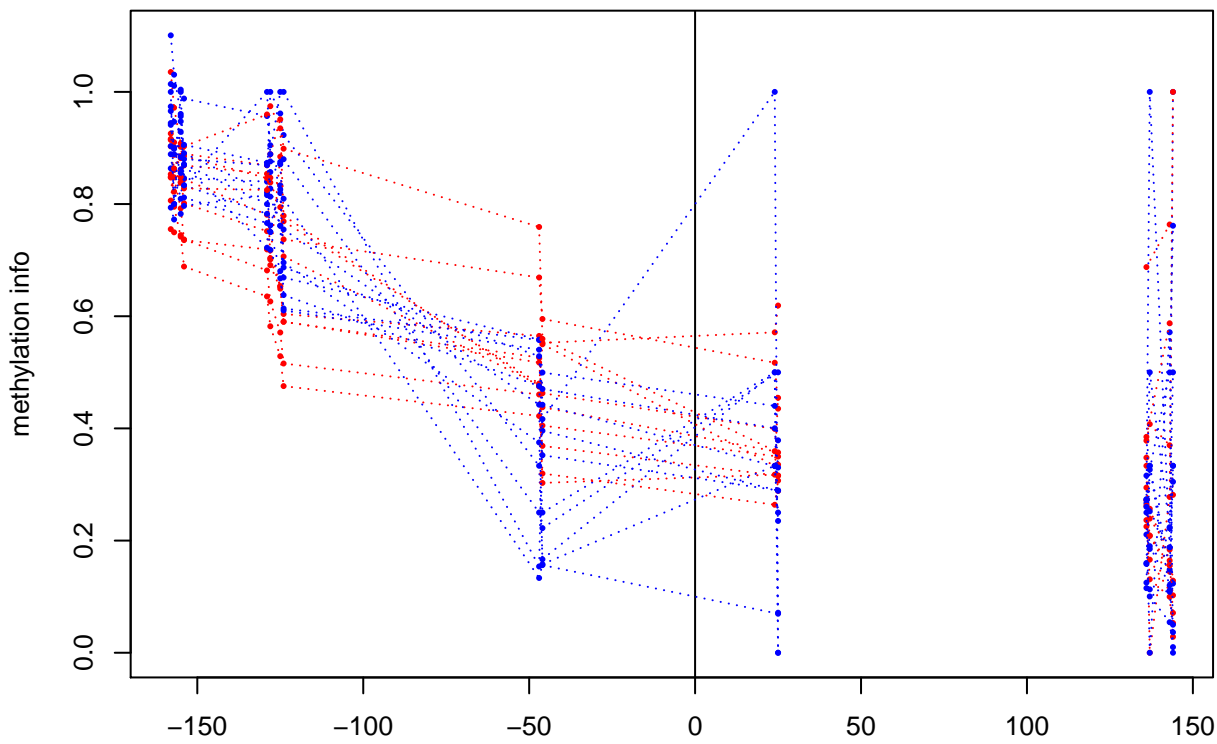

RNAseq logFC(UC-N)= -1.59

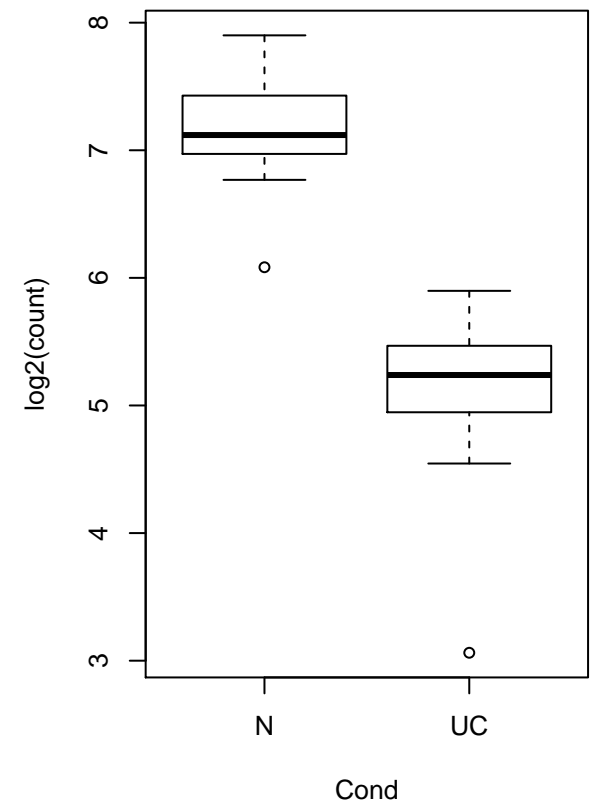

FAM216B average UC-N %methylation max=-4.55% min=-17.97%

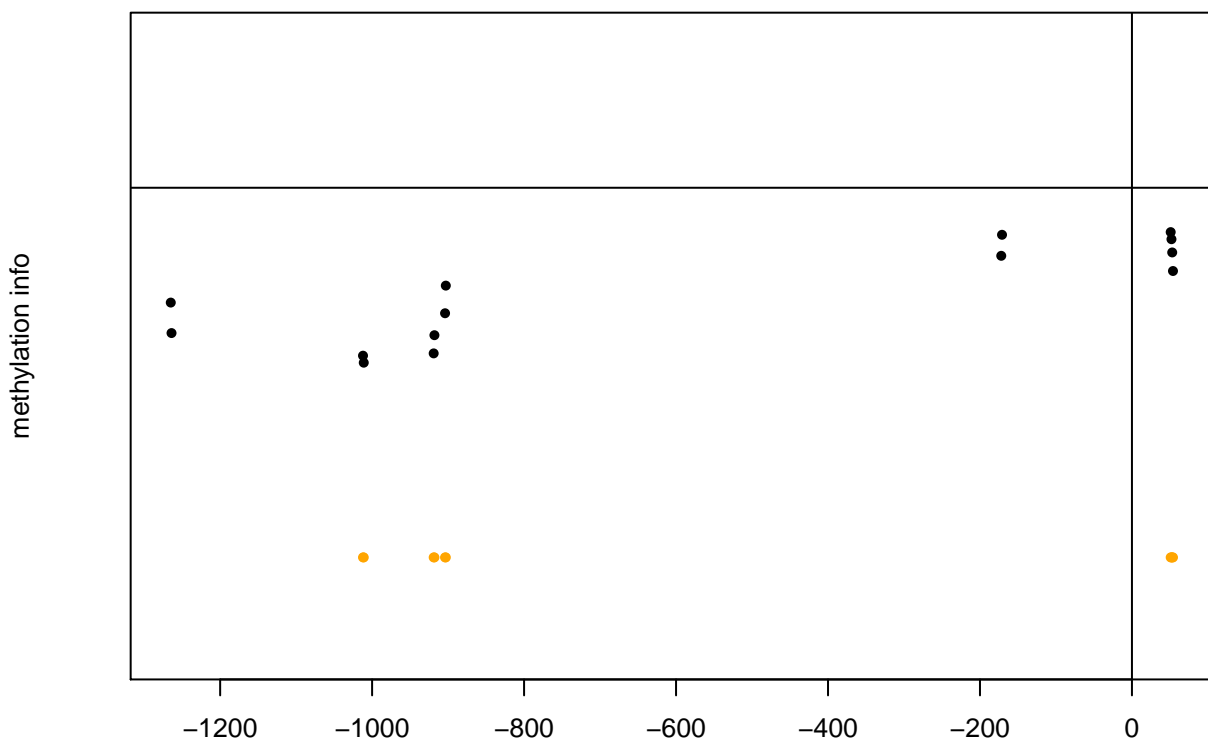

FAM216B raw %methylation, red=UC, blue=Normal

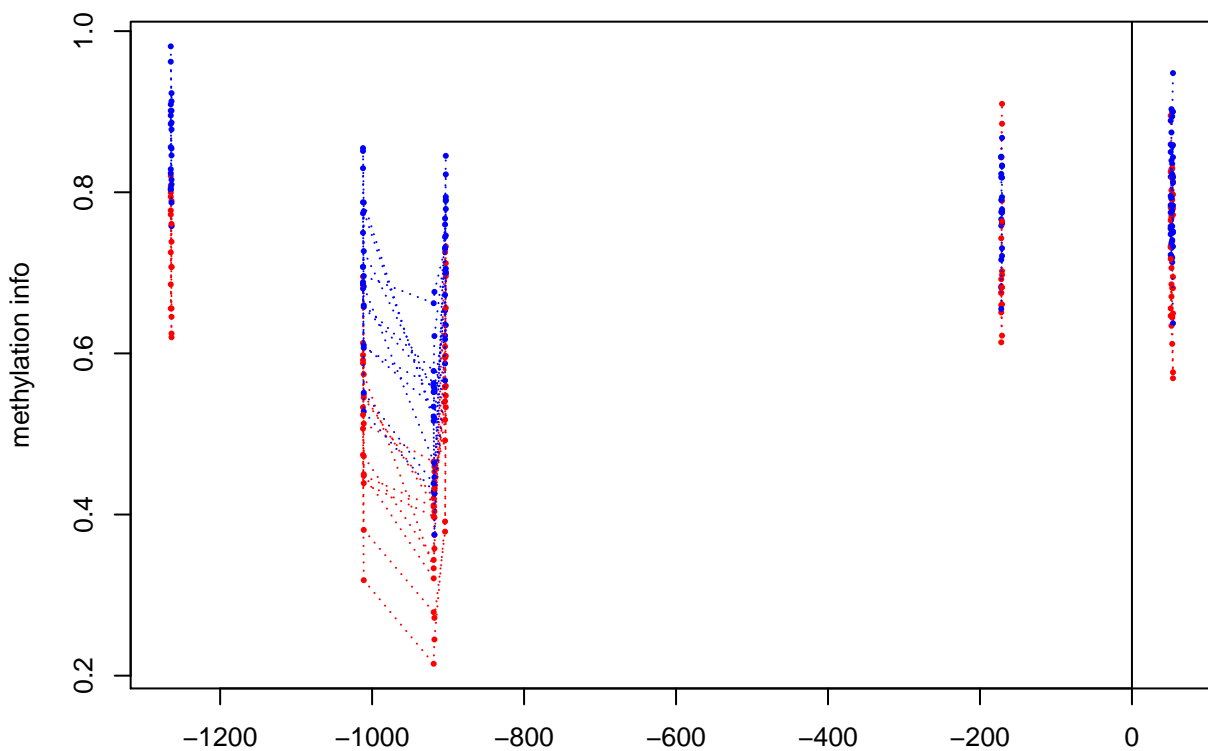

RNAseq logFC(UC-N)= 1.97

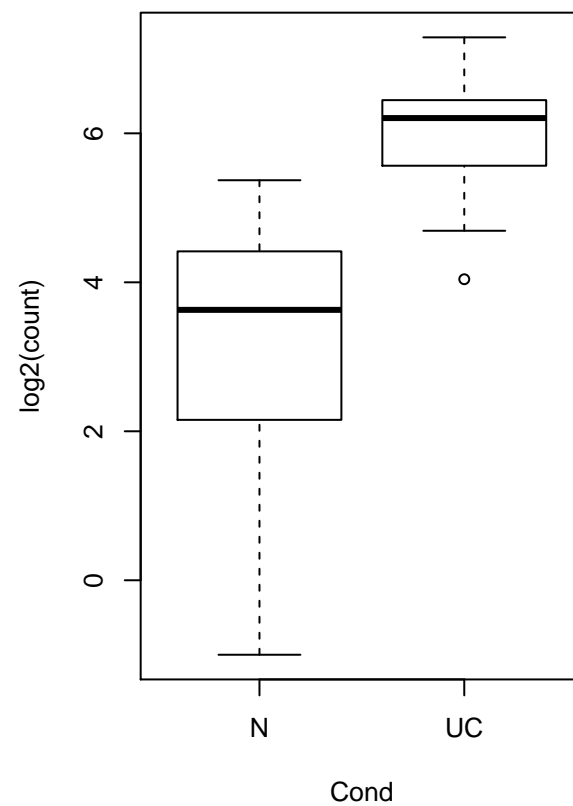

FAM47E average UC-N %methylation max=18.17% min=-1.3%

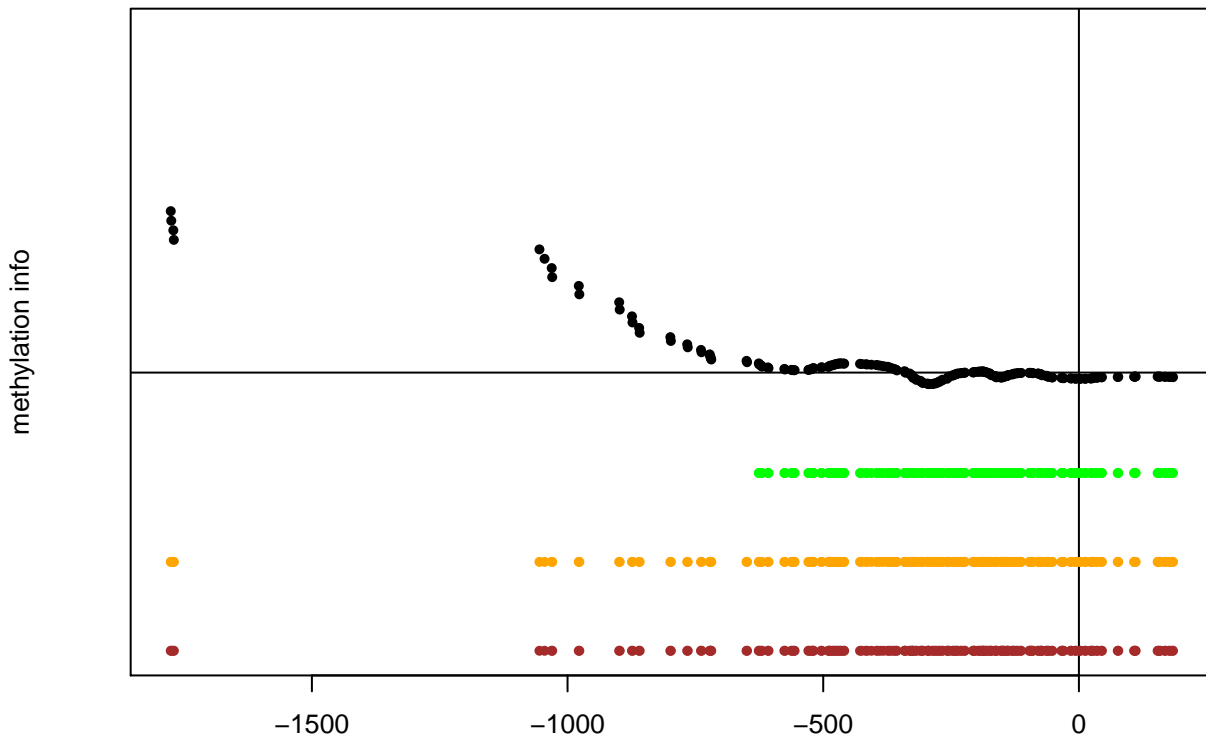

FAM47E raw %methylation, red=UC, blue=Normal

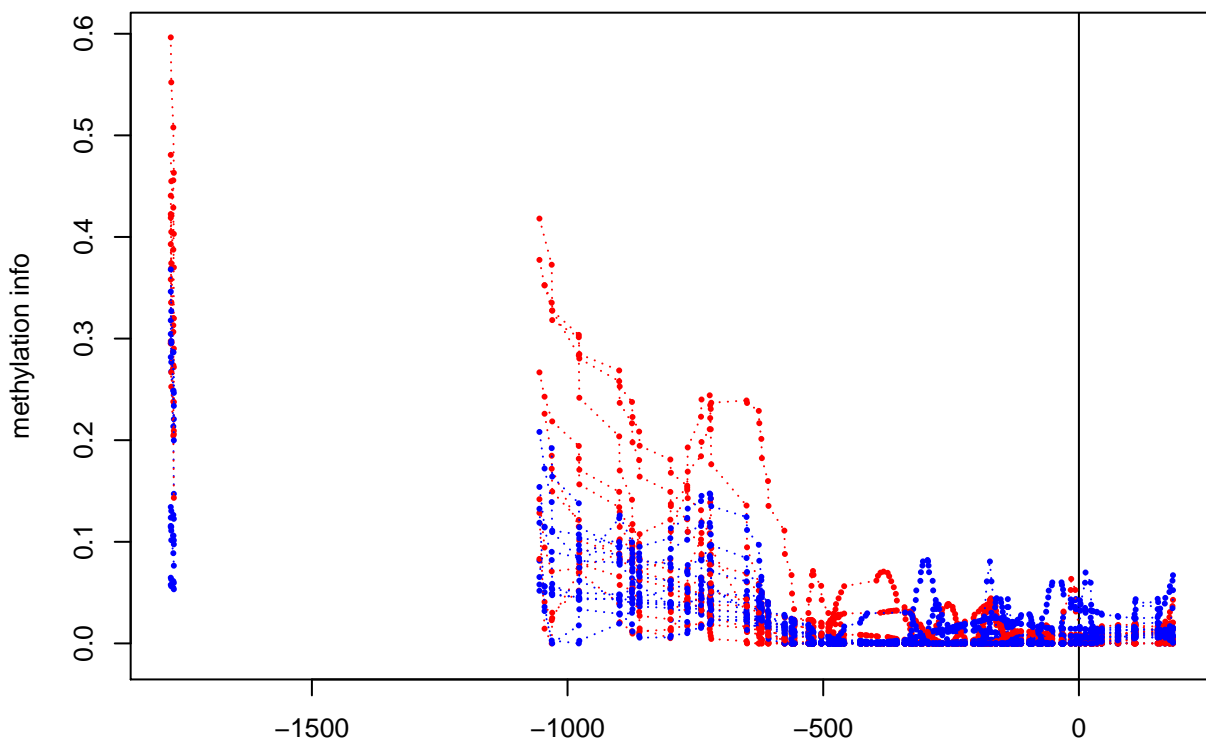

RNAseq logFC(UC-N)= -1.29

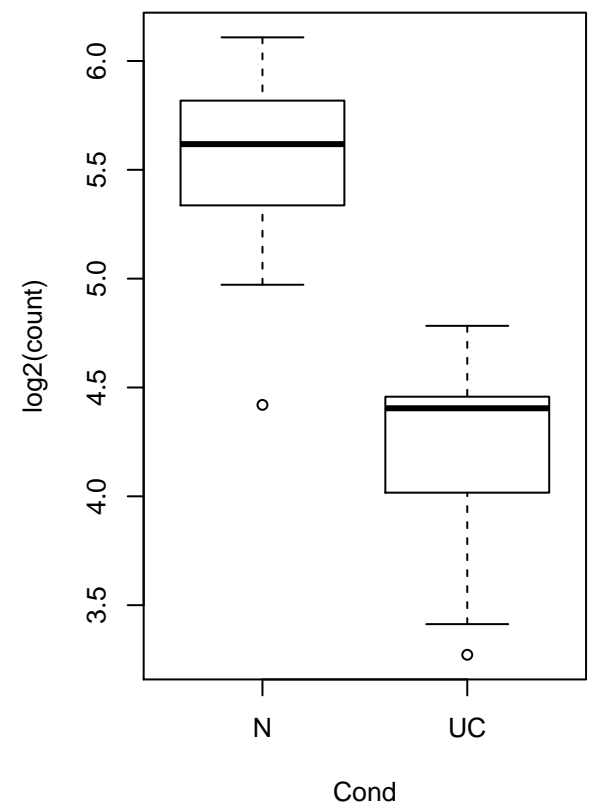



FAM65B average UC-N %methylation max=-28.18% min=-42.11%

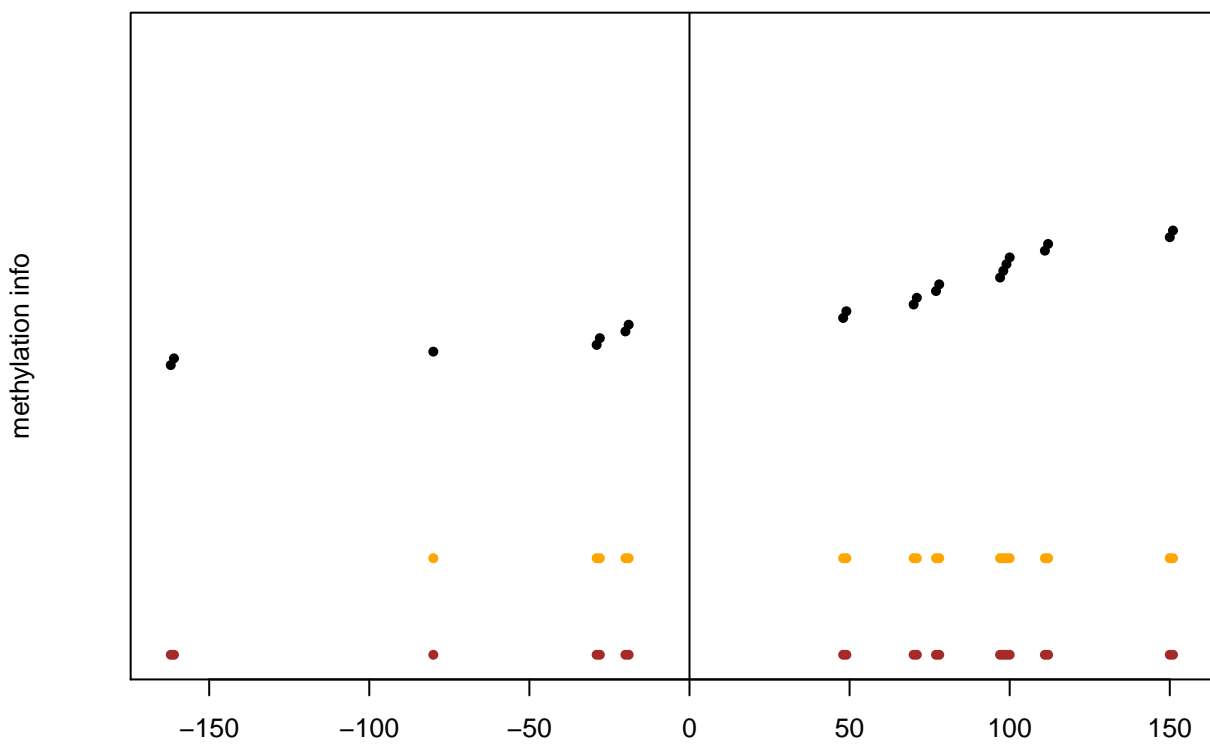

FAM65B raw %methylation, red=UC, blue=Normal

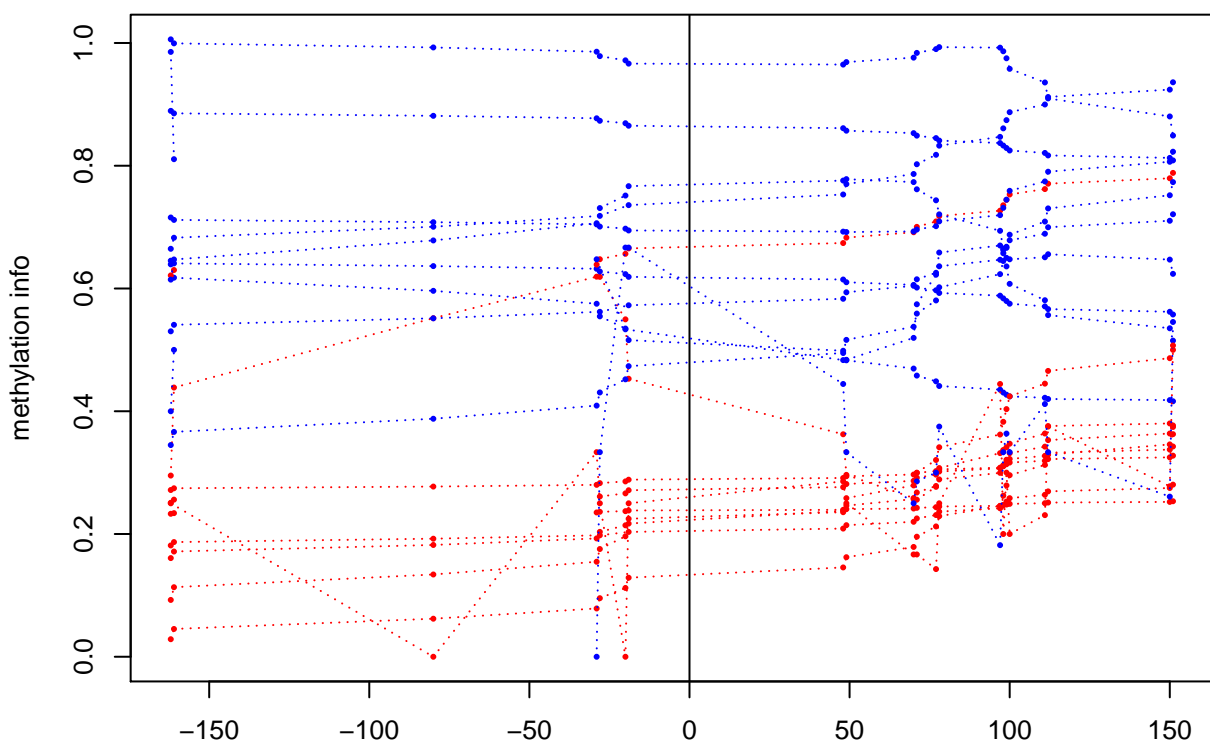

RNAseq logFC(UC-N)= 1.92

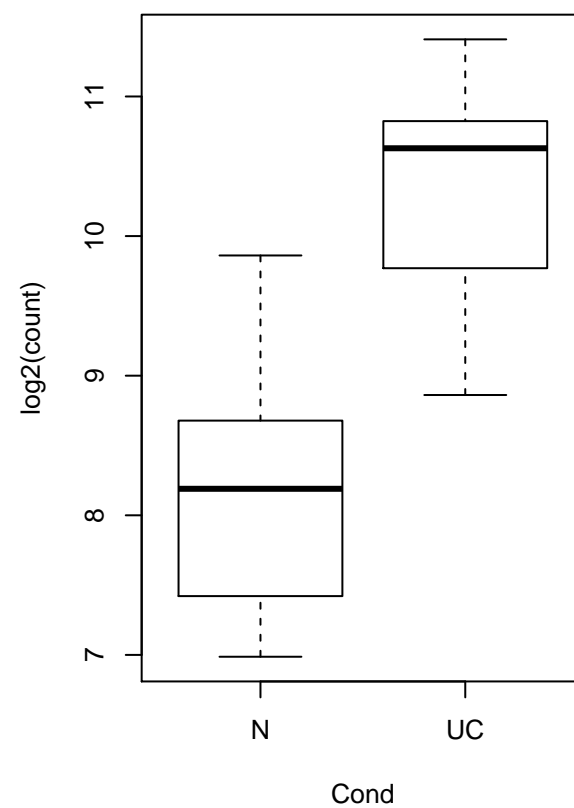

FASLG average UC-N %methylation max=-3.14% min=-20.41%

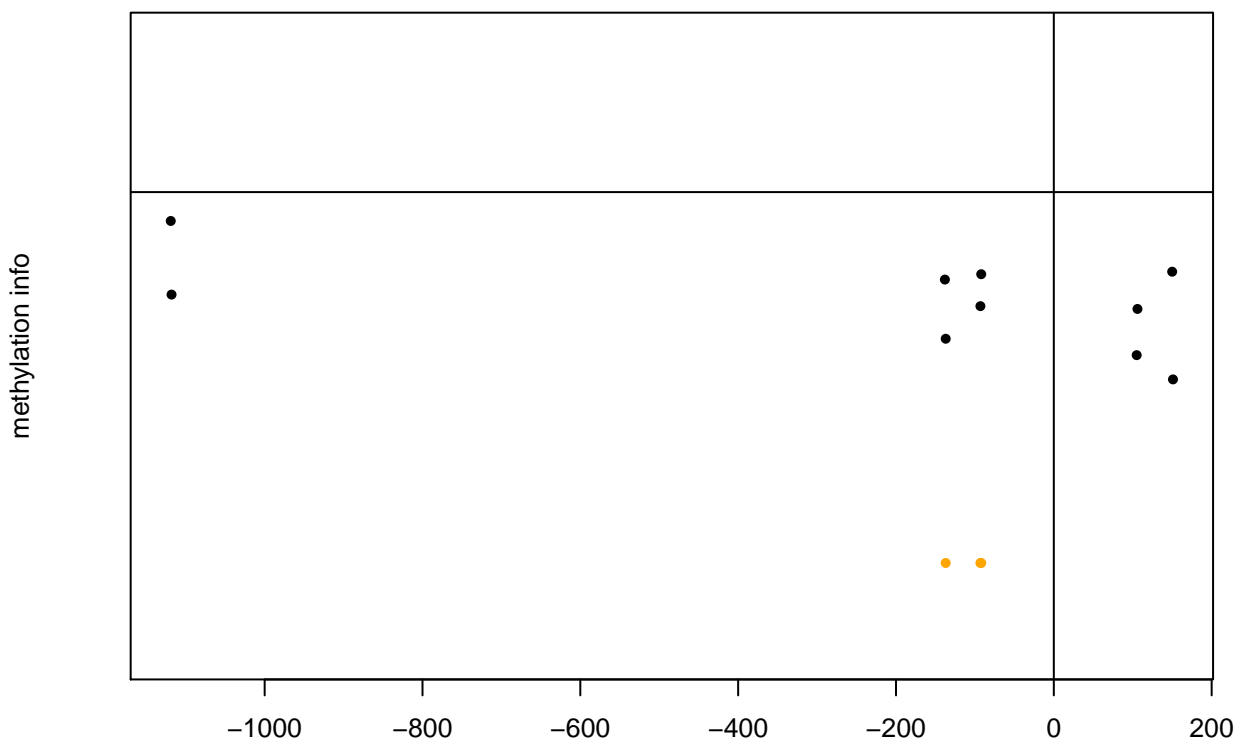

FASLG raw %methylation, red=UC, blue=Normal

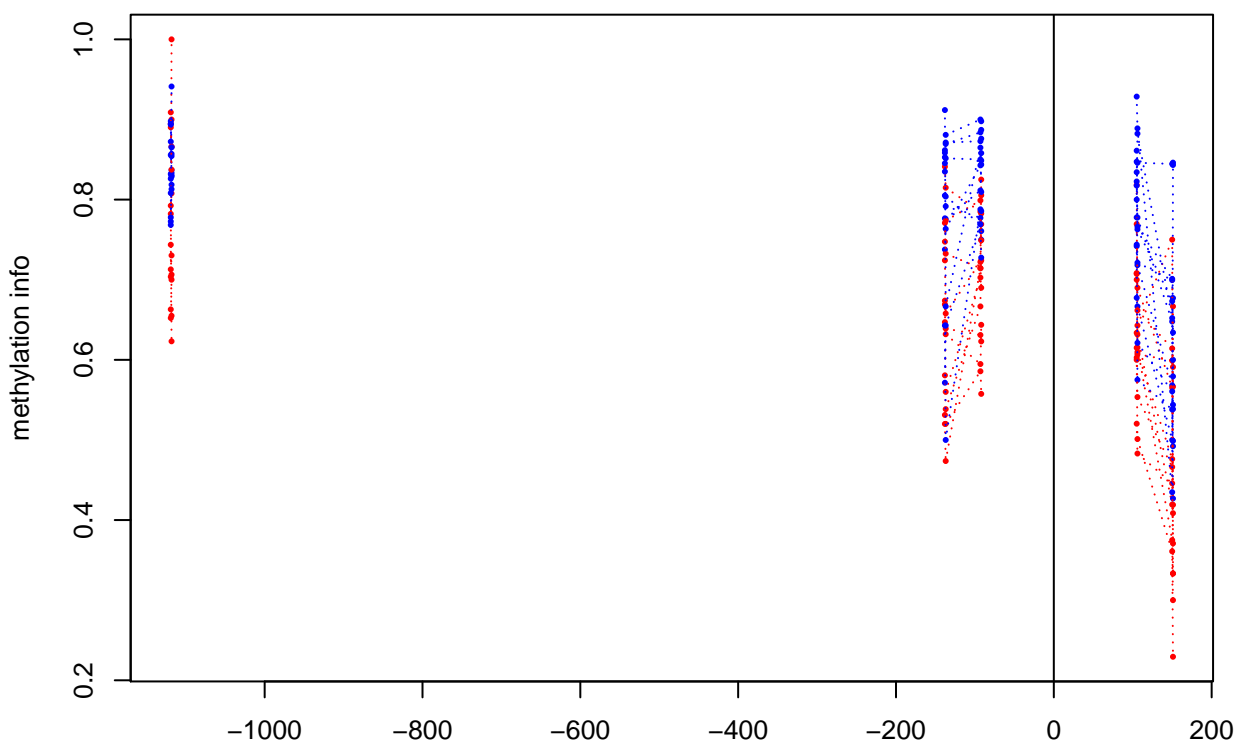

RNAseq logFC(UC-N)= 1.13

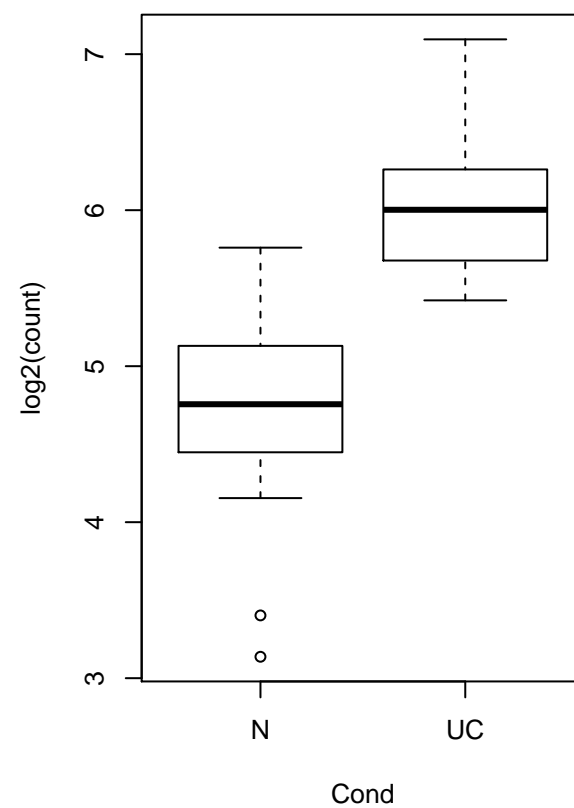

FCER2 average UC-N %methylation max=-4.66% min=-22.88%

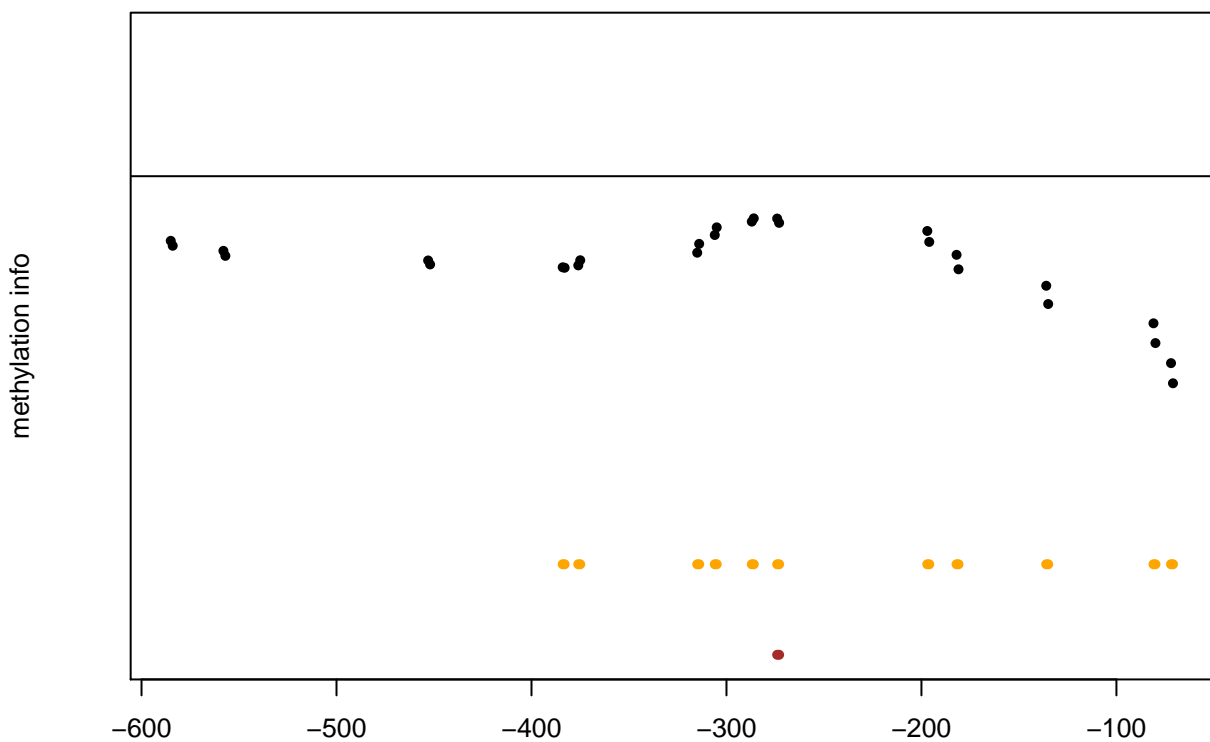

FCER2 raw %methylation, red=UC, blue=Normal

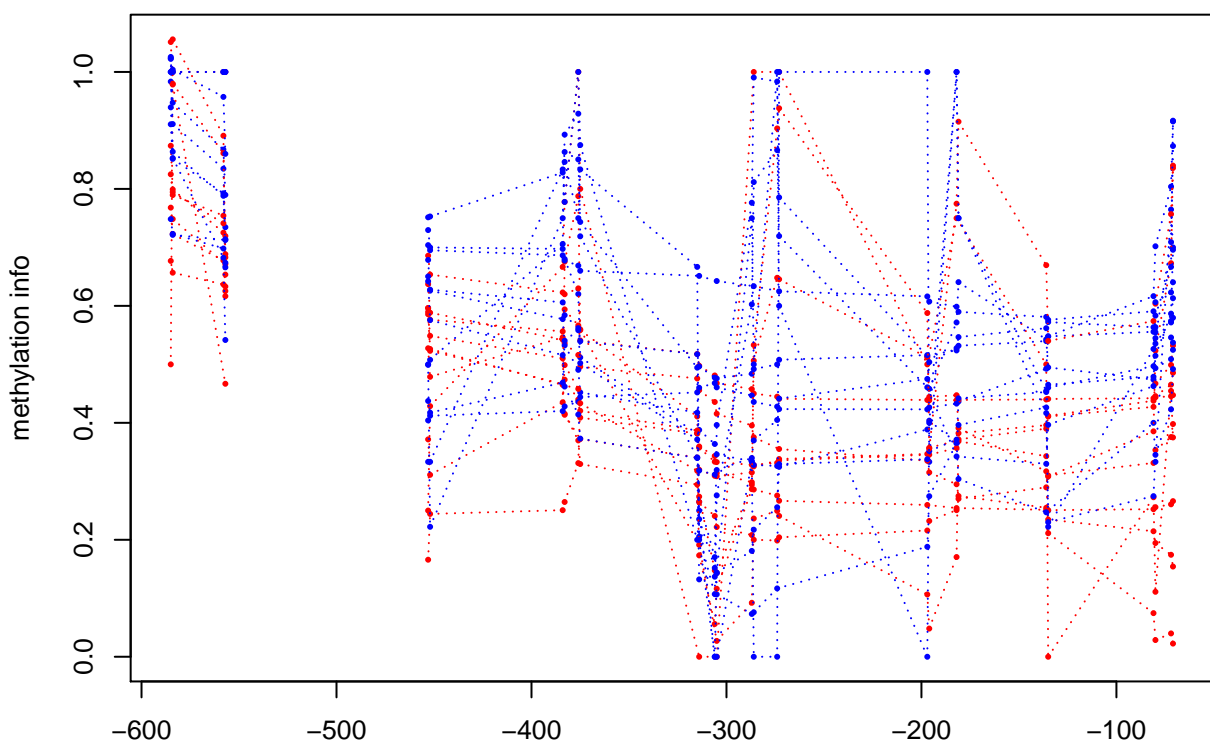

RNAseq logFC(UC-N)= 2.07

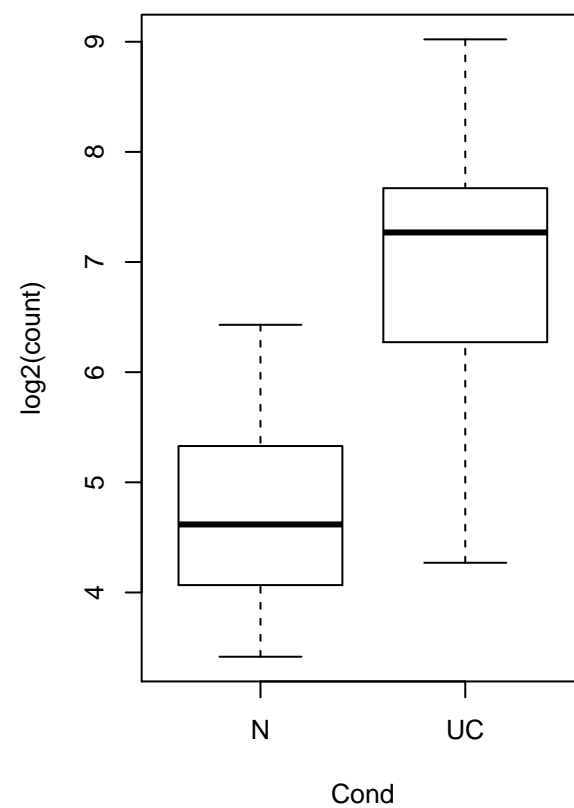

FCGR1A average UC-N %methylation max=-0.72% min=-15.35%

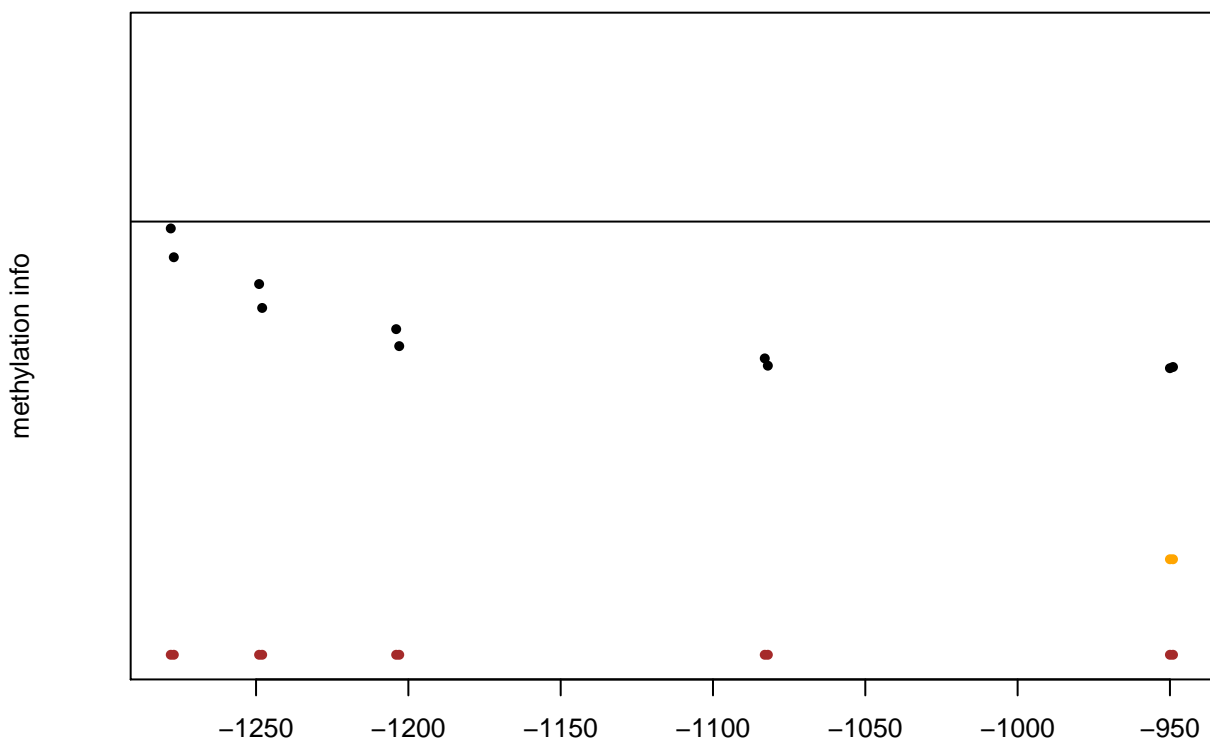

FCGR1A raw %methylation, red=UC, blue=Normal

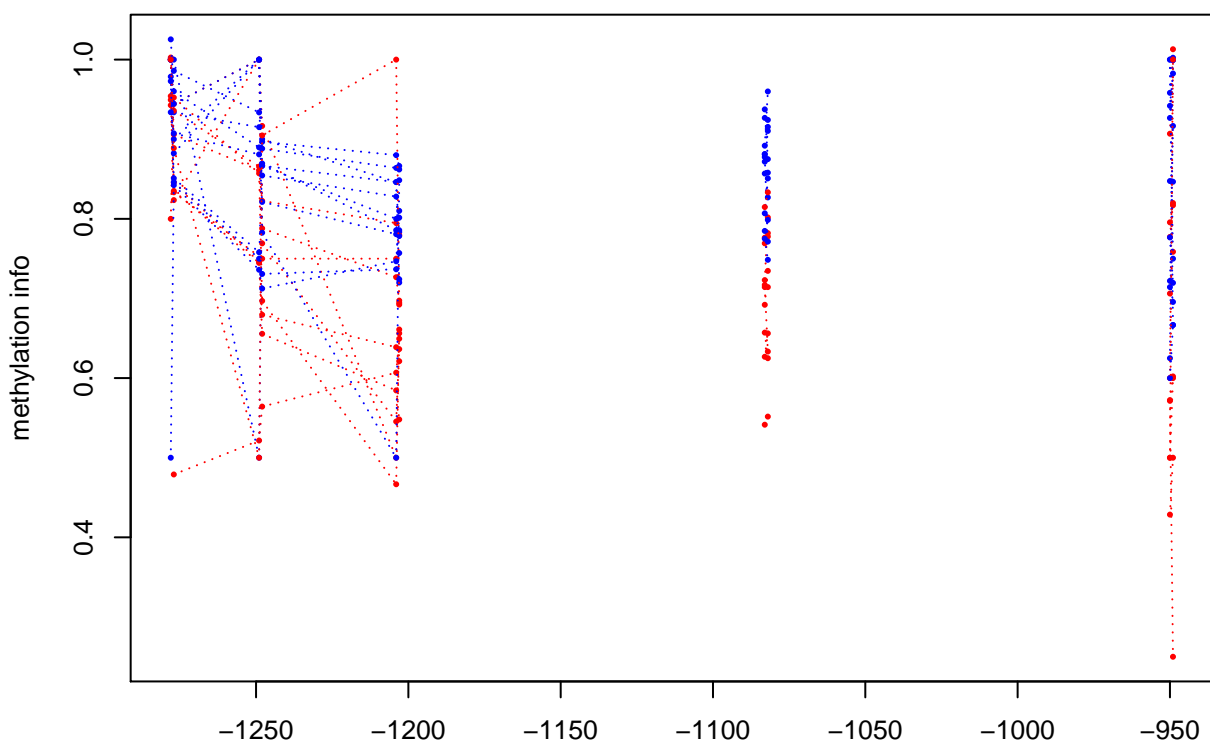

RNAseq logFC(UC-N)= 1.5

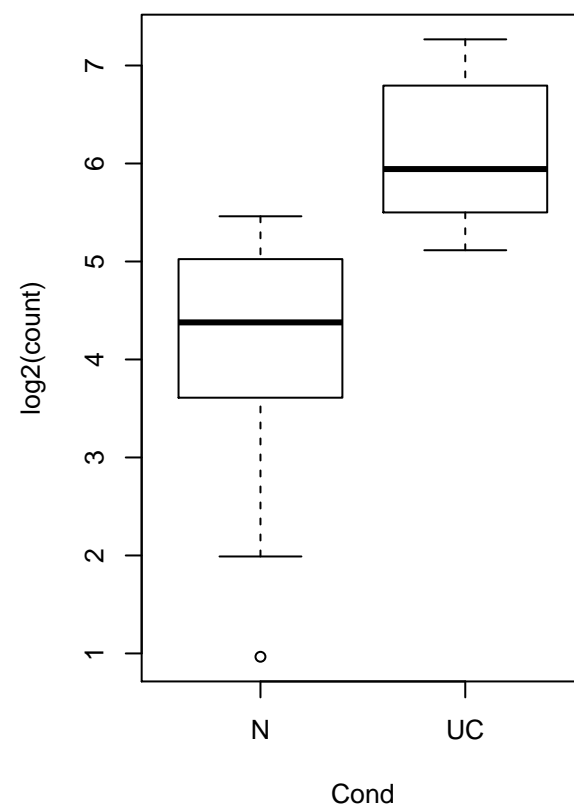

FCGR3A average UC-N %methylation max=4.18% min=-41.8%

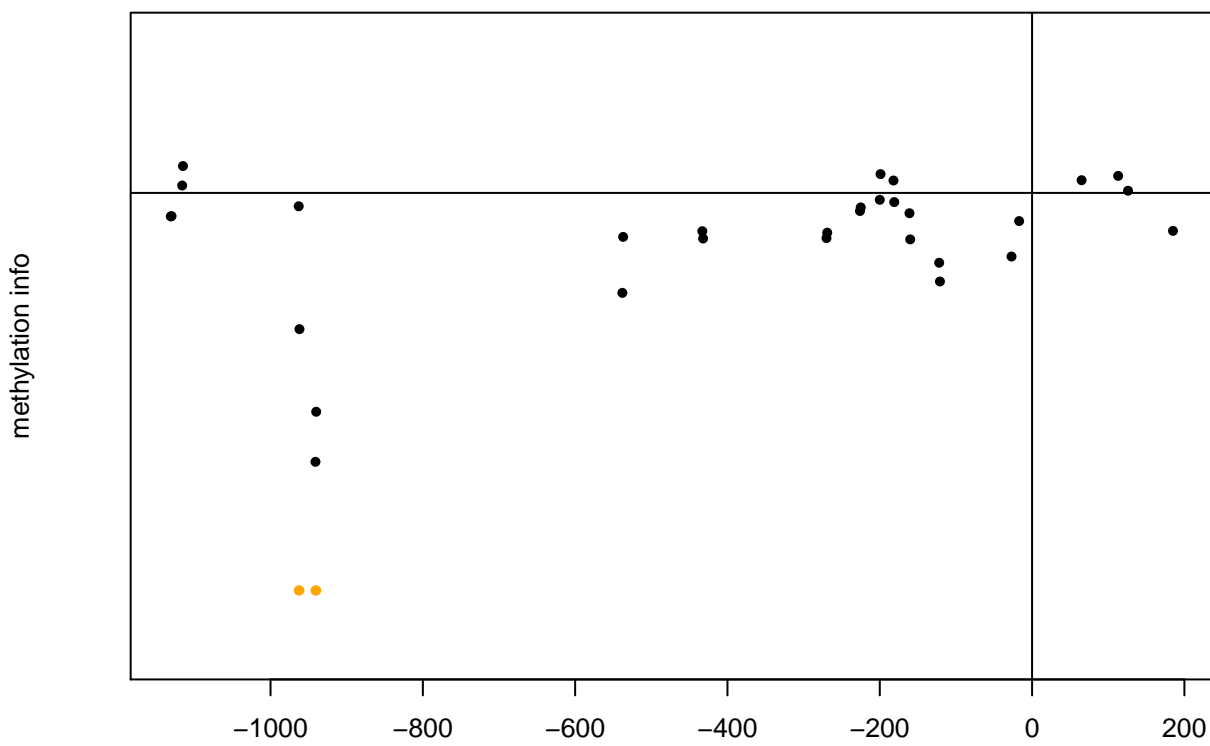

FCGR3A raw %methylation, red=UC, blue=Normal

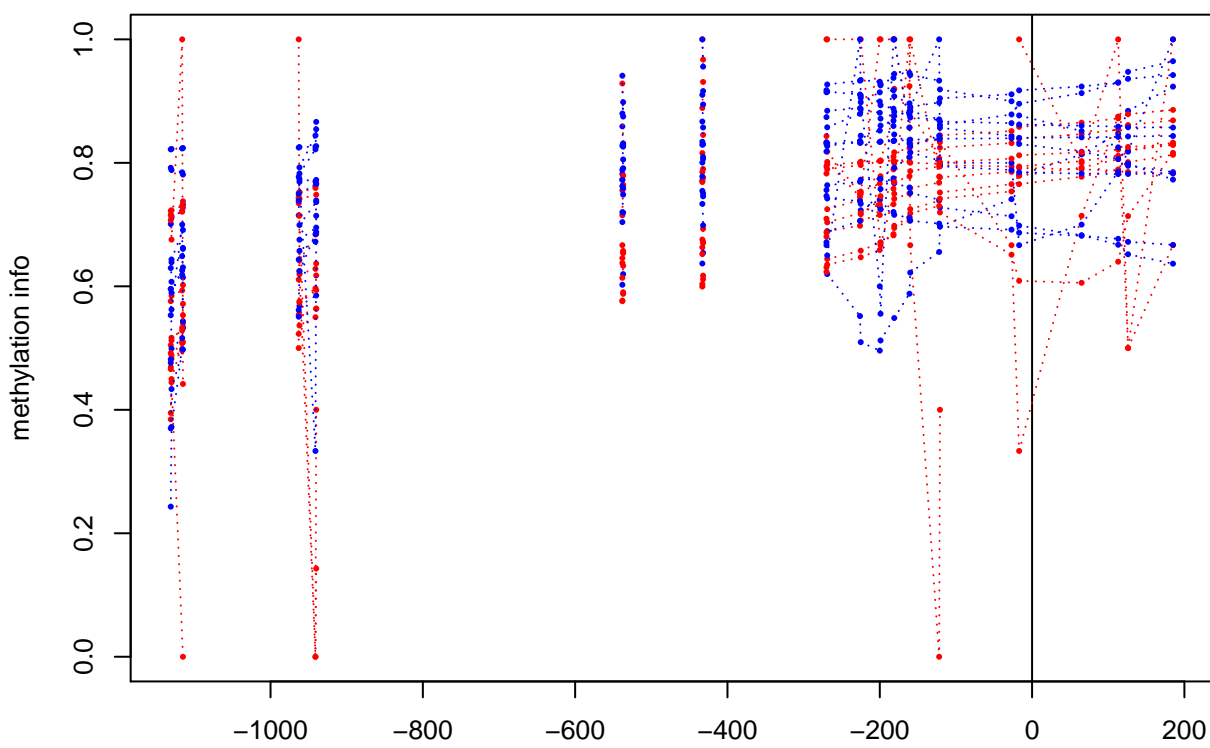

RNAseq logFC(UC-N)= 2.13

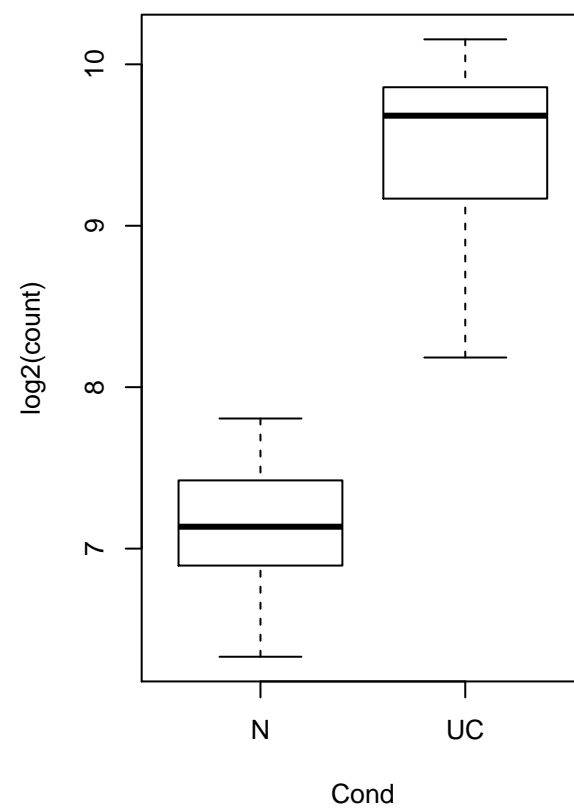

FCMR average UC-N %methylation max=-10.53% min=-33.09%

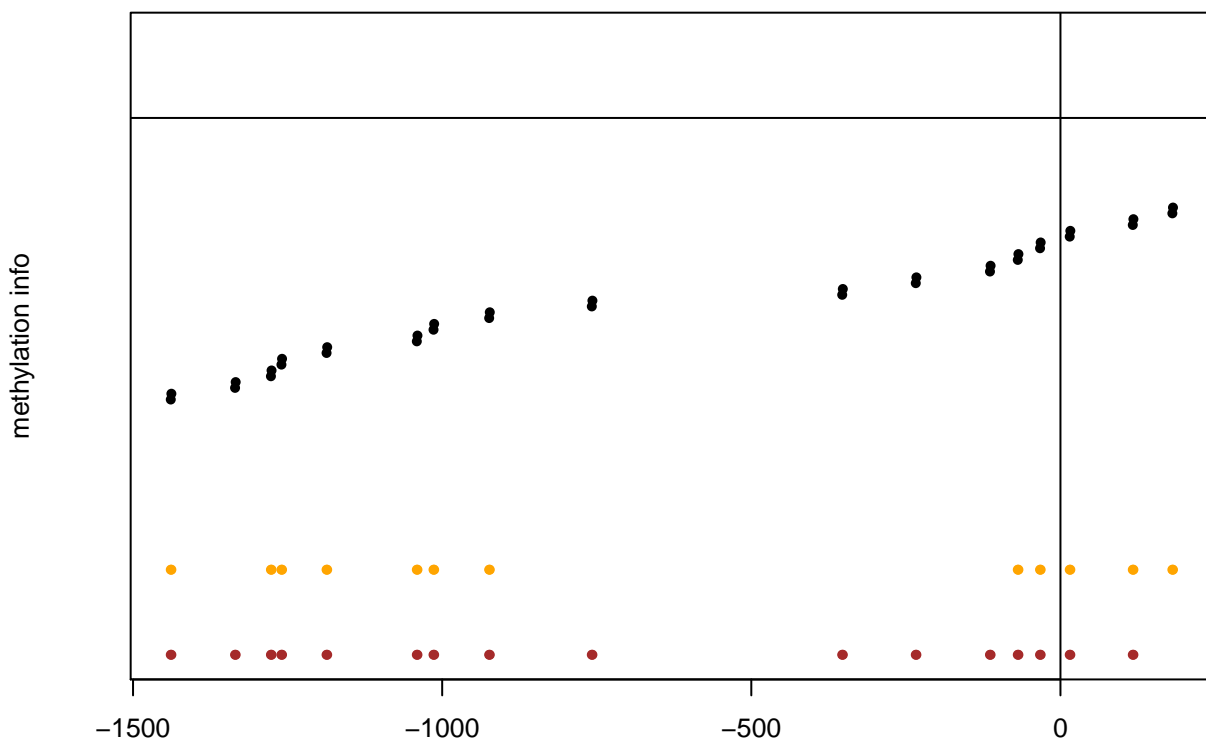

FCMR raw %methylation, red=UC, blue=Normal

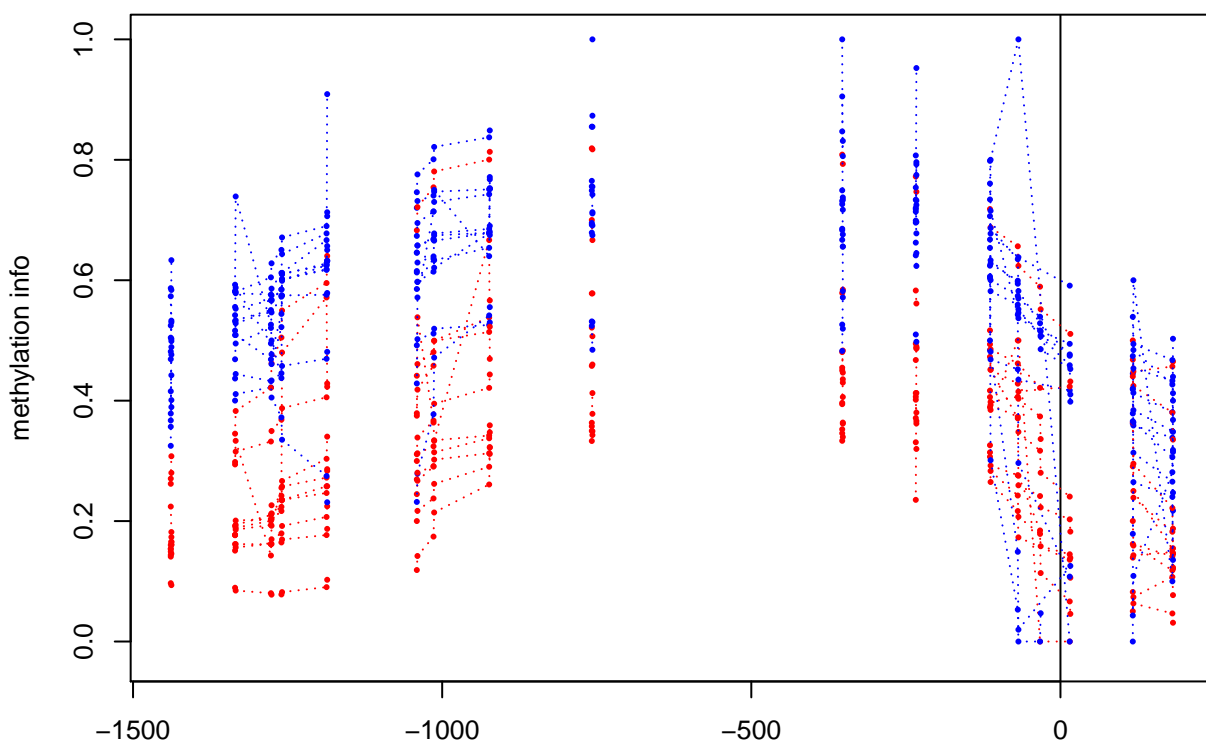

RNAseq logFC(UC-N)= 1.51

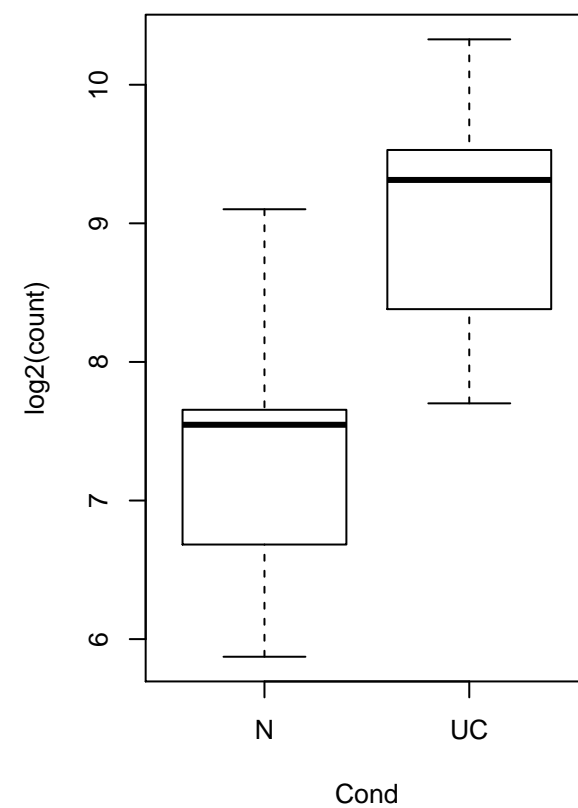

FCN1 average UC-N %methylation max=-10.71% min=-13.66%

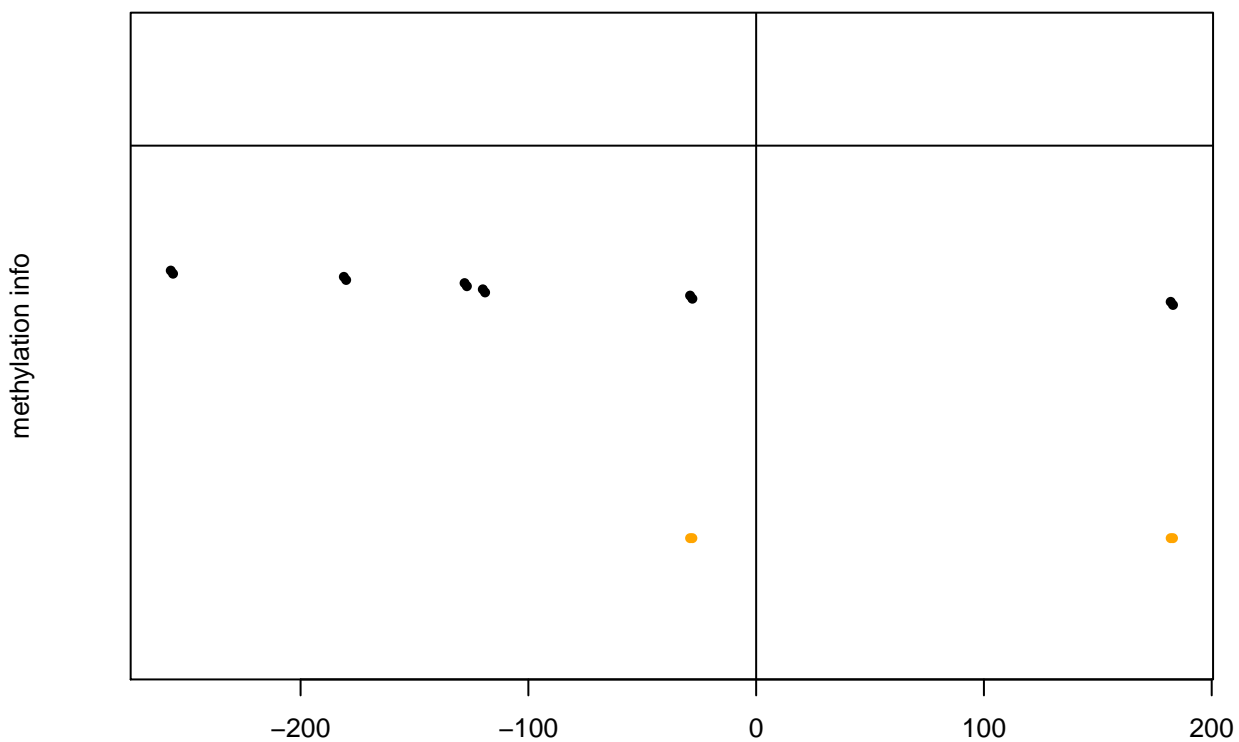

FCN1 raw %methylation, red=UC, blue=Normal

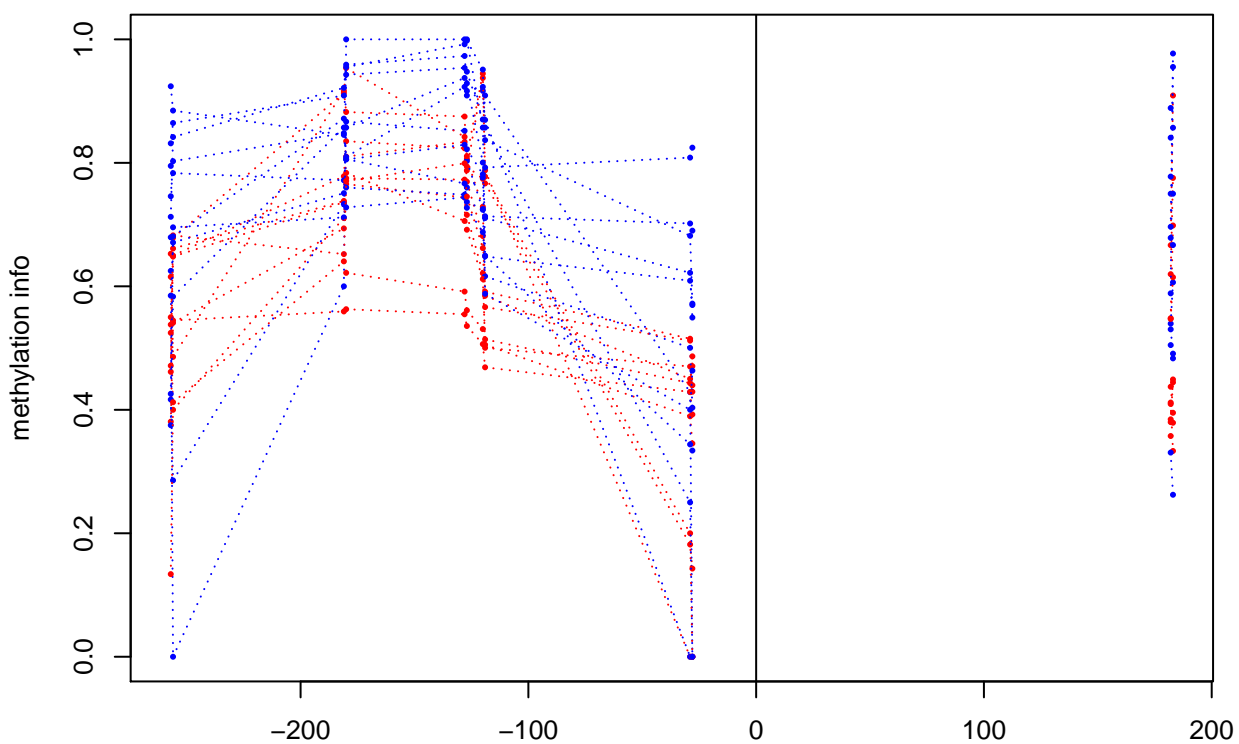

RNAseq logFC(UC-N)= 3.25

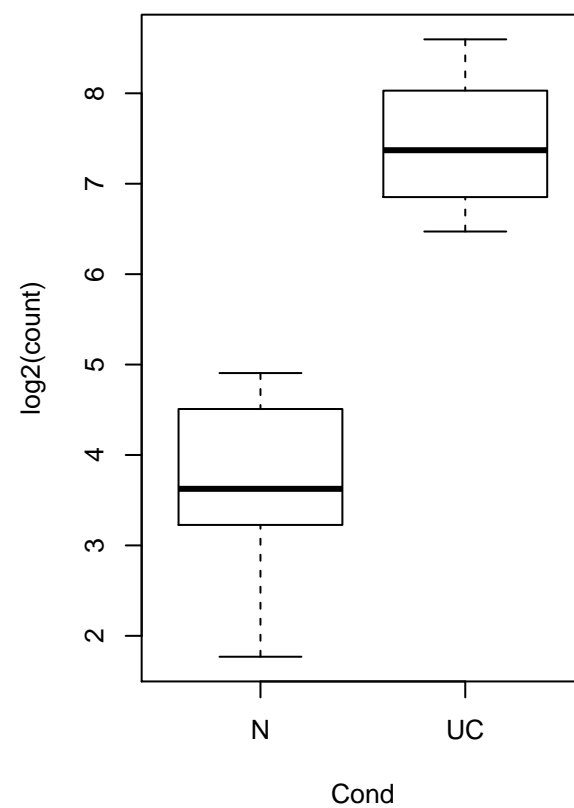

FCRL1 average UC-N %methylation max=-17.09% min=-26.88%

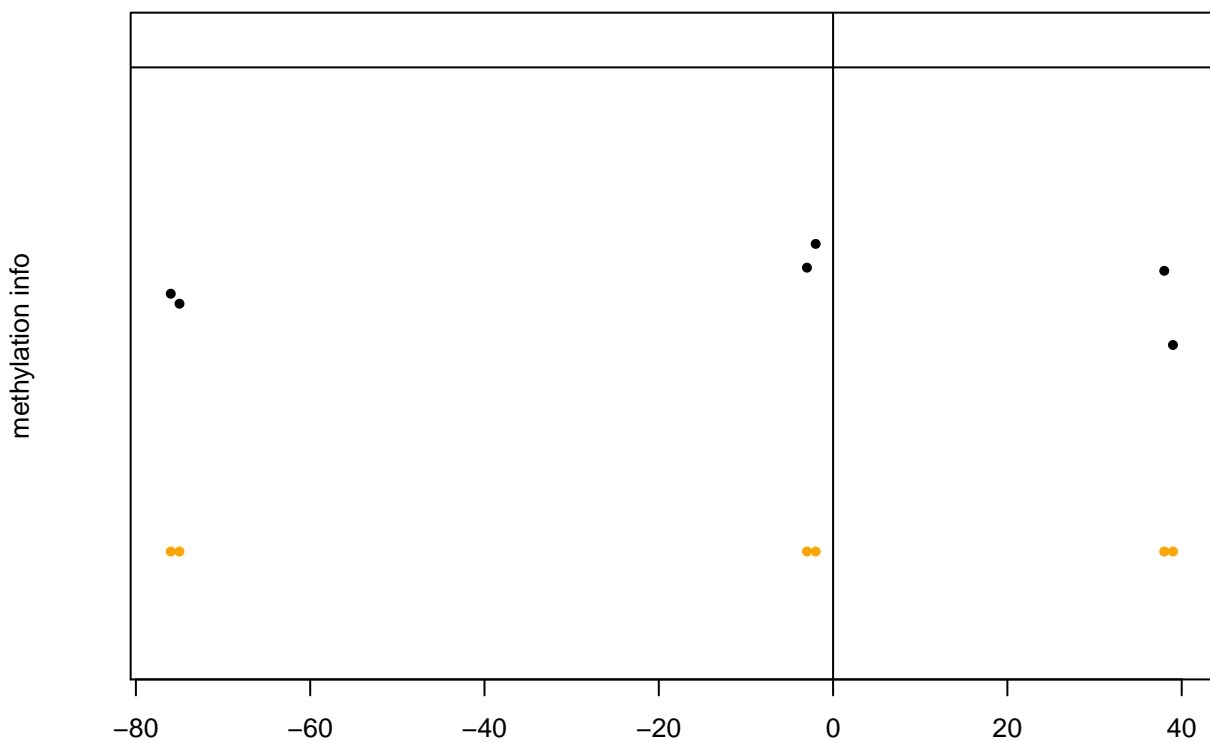

FCRL1 raw %methylation, red=UC, blue=Normal

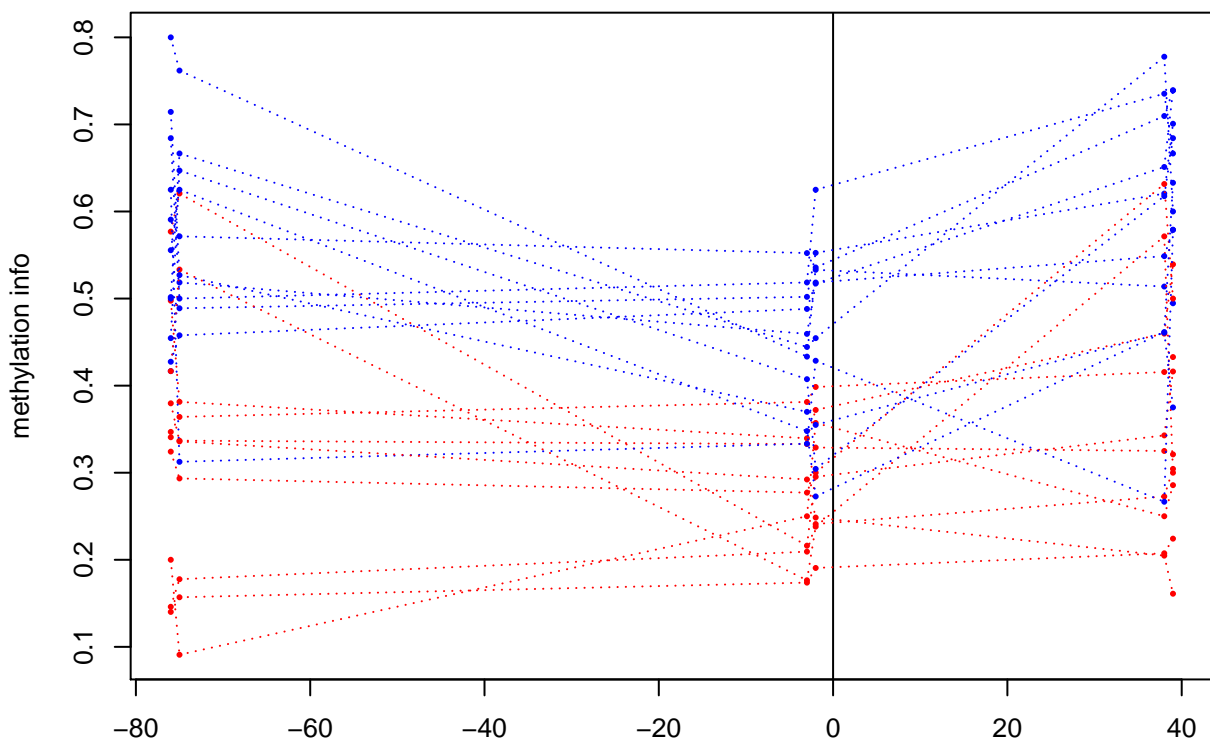

RNAseq logFC(UC-N)= 1.93

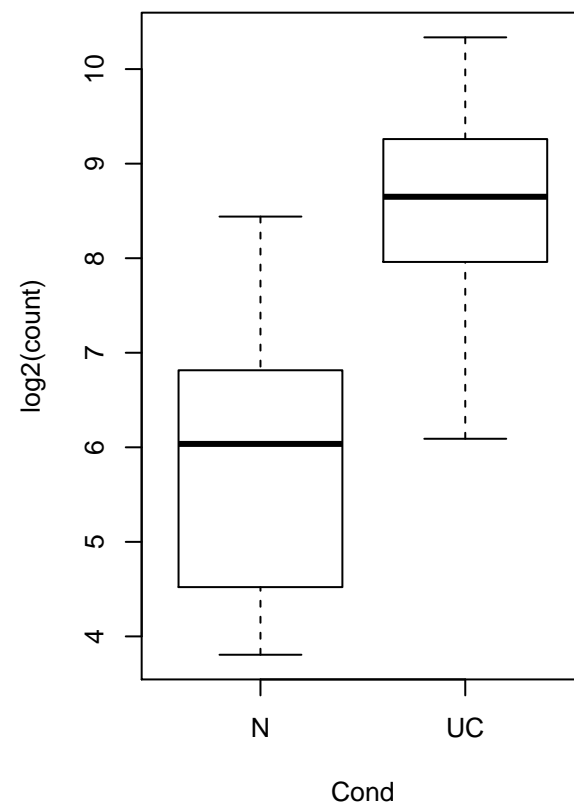



FCRL3 average UC-N %methylation max=-20.22% min=-31.43%

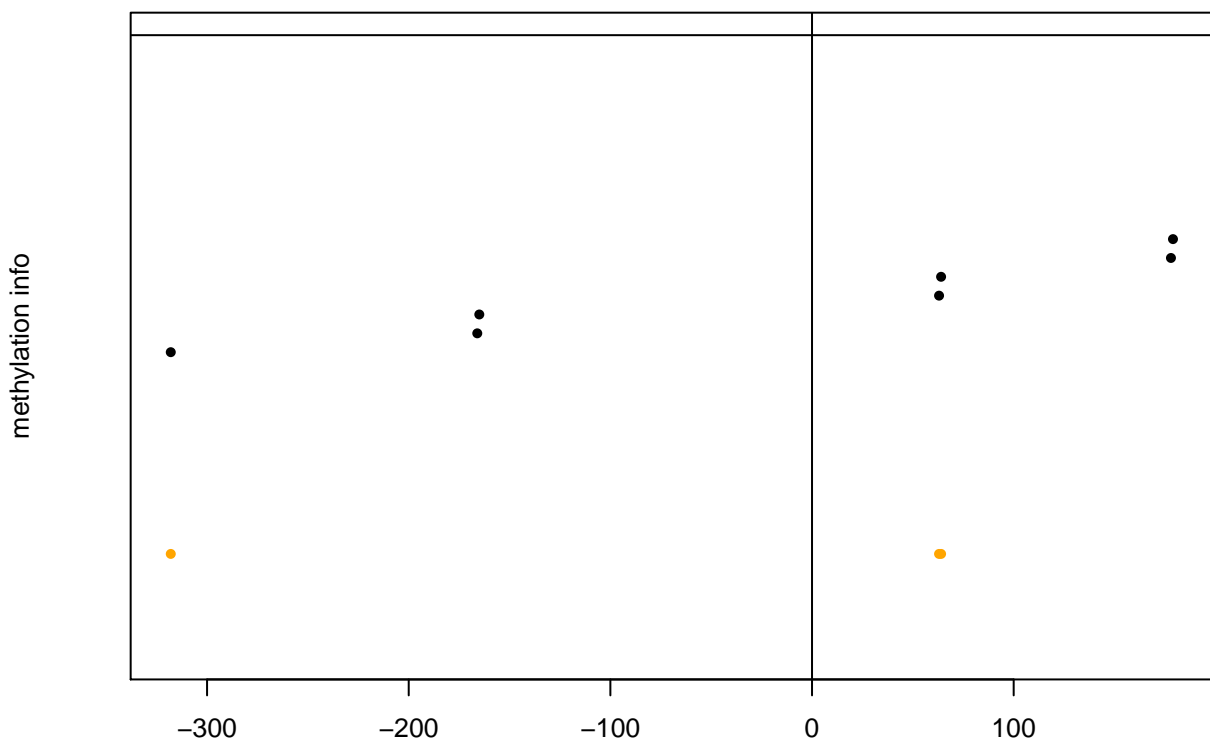

FCRL3 raw %methylation, red=UC, blue=Normal

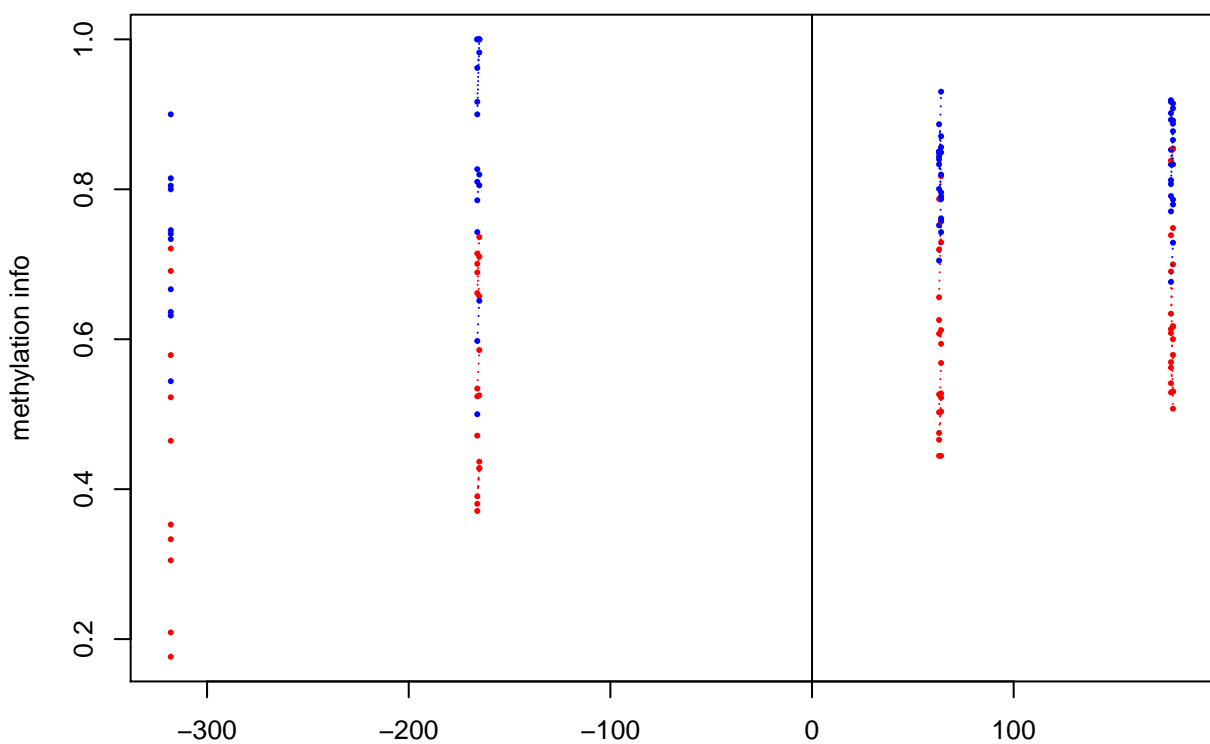

RNAseq logFC(UC-N)= 2.22

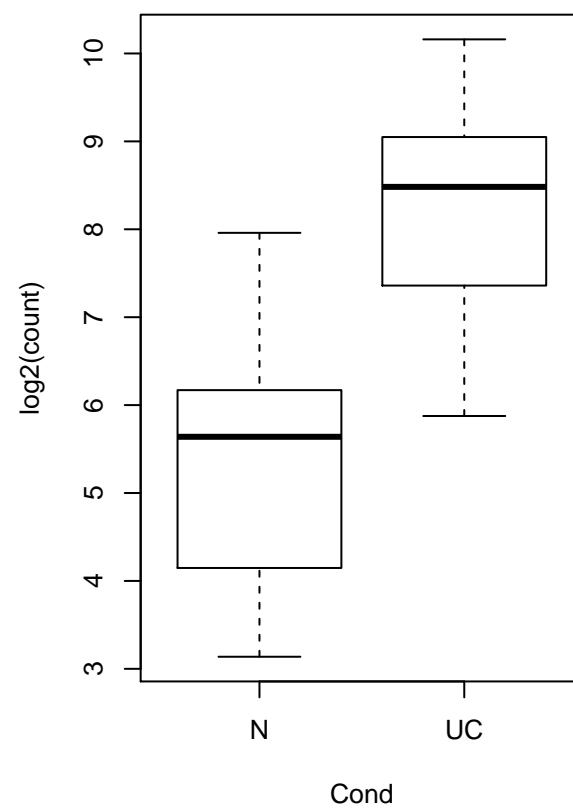

FCRL6 average UC-N %methylation max=-13.94% min=-33.86%

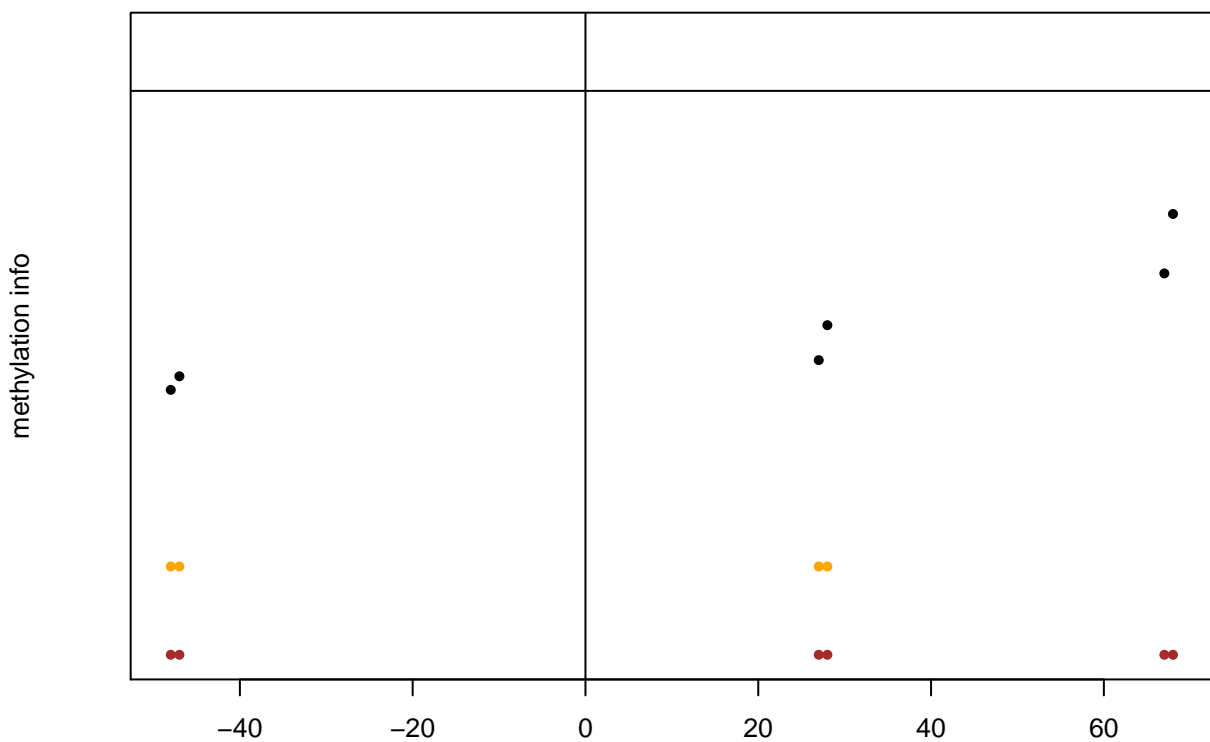

FCRL6 raw %methylation, red=UC, blue=Normal

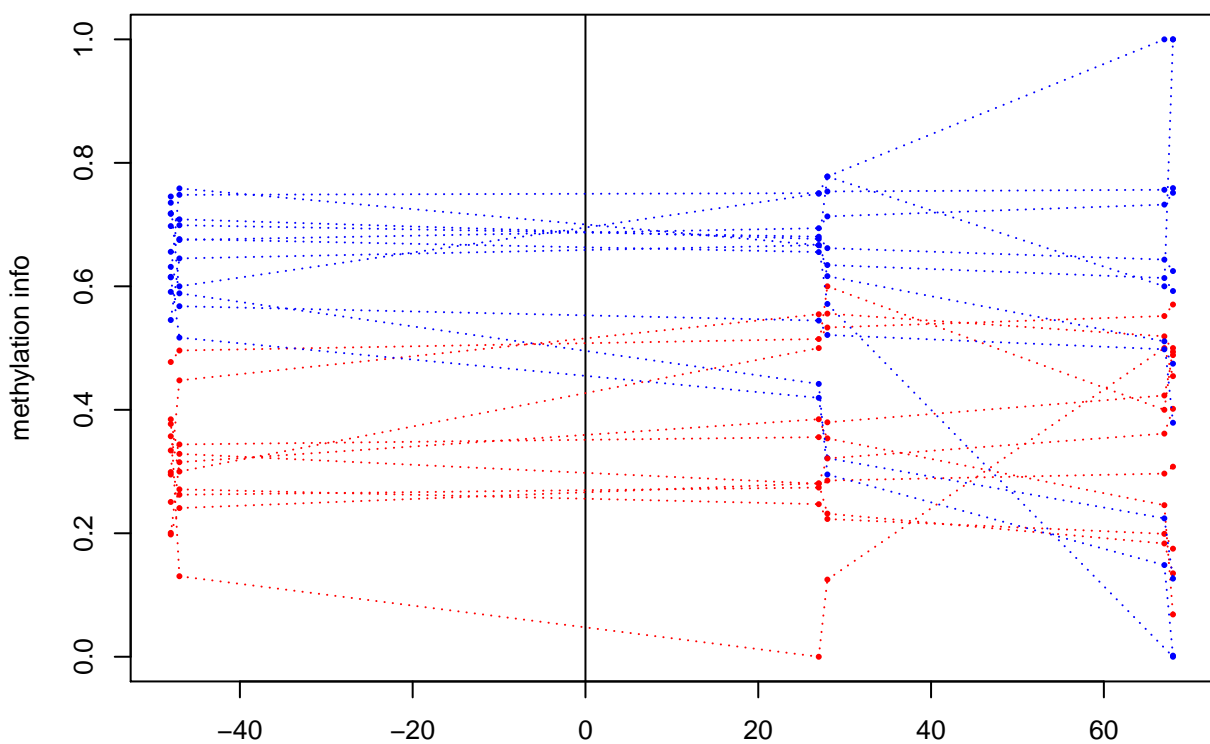

RNAseq logFC(UC-N)= 1.71

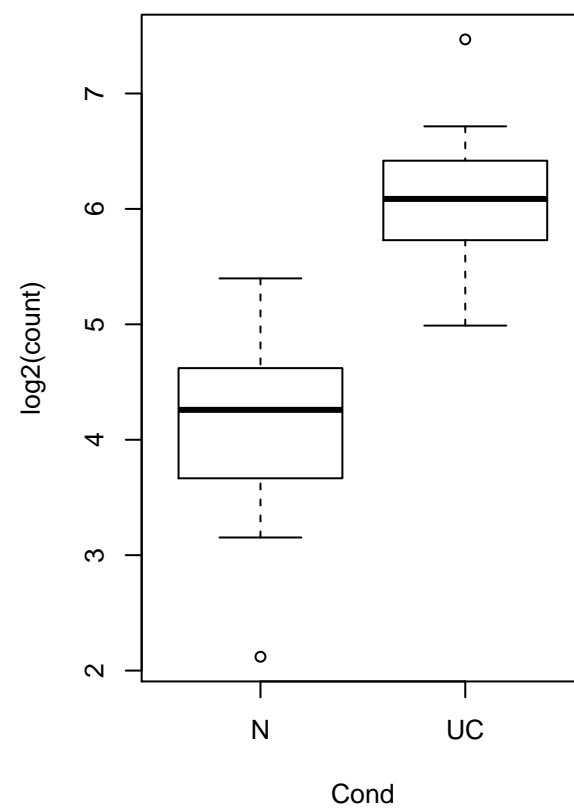

FCRLA average UC-N %methylation max=-4.06% min=-18.99%

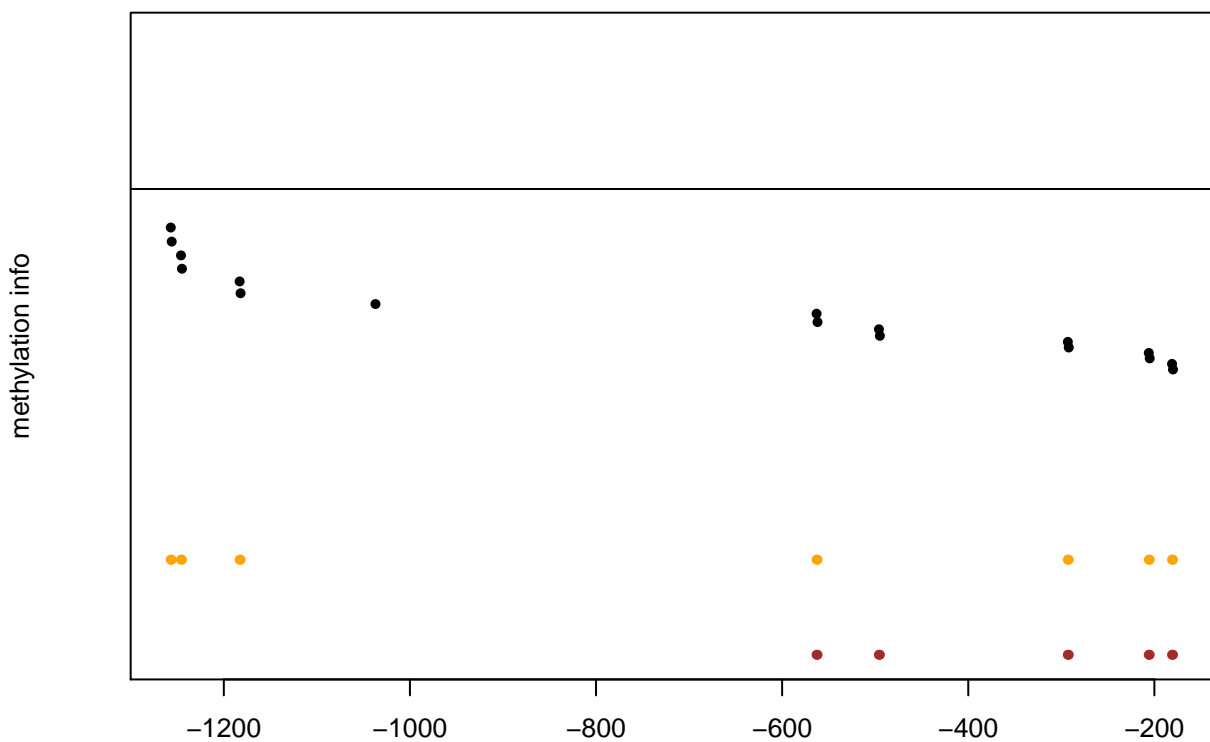

FCRLA raw %methylation, red=UC, blue=Normal

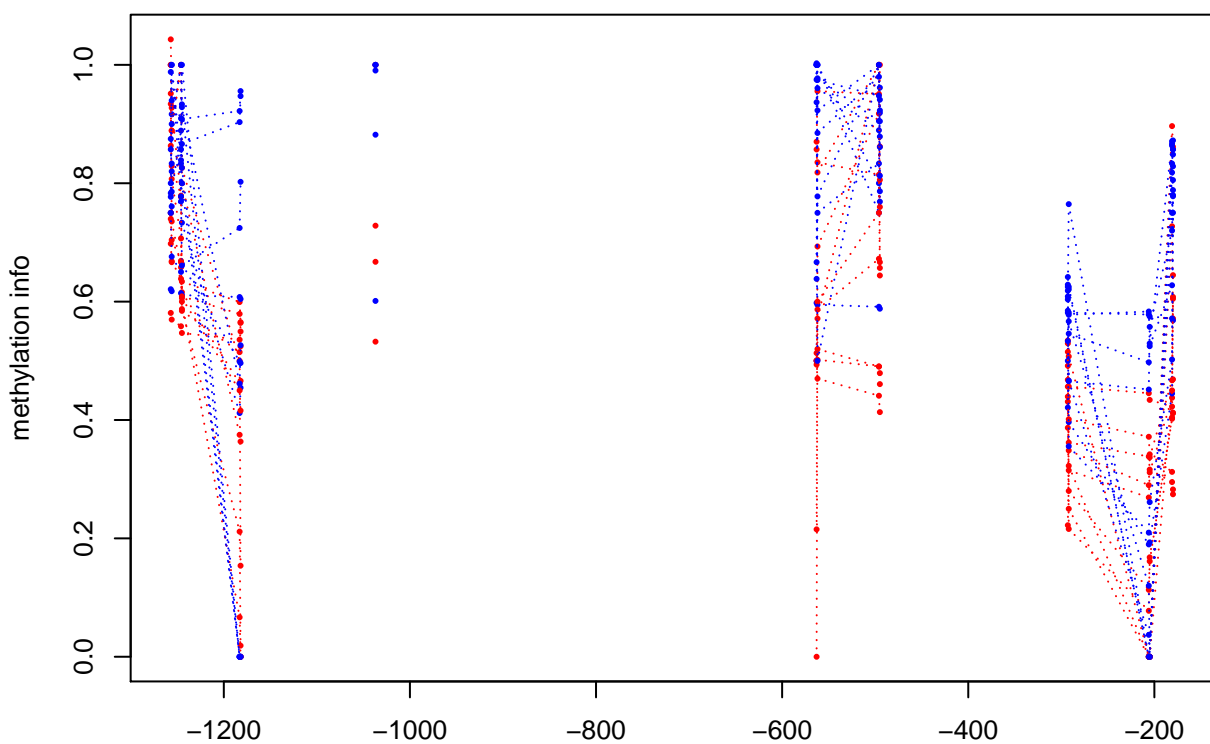

RNAseq logFC(UC-N)= 1.76

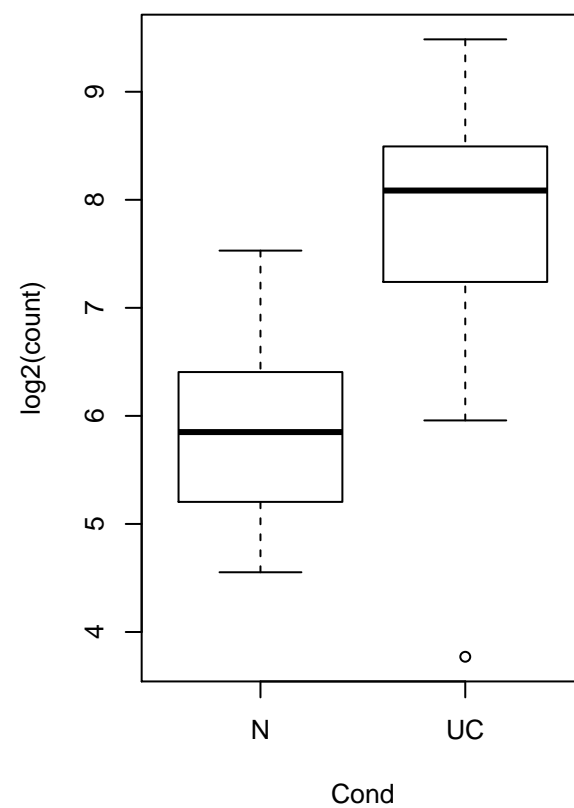

FFAR2 average UC-N %methylation max=19.52% min=-24.4%

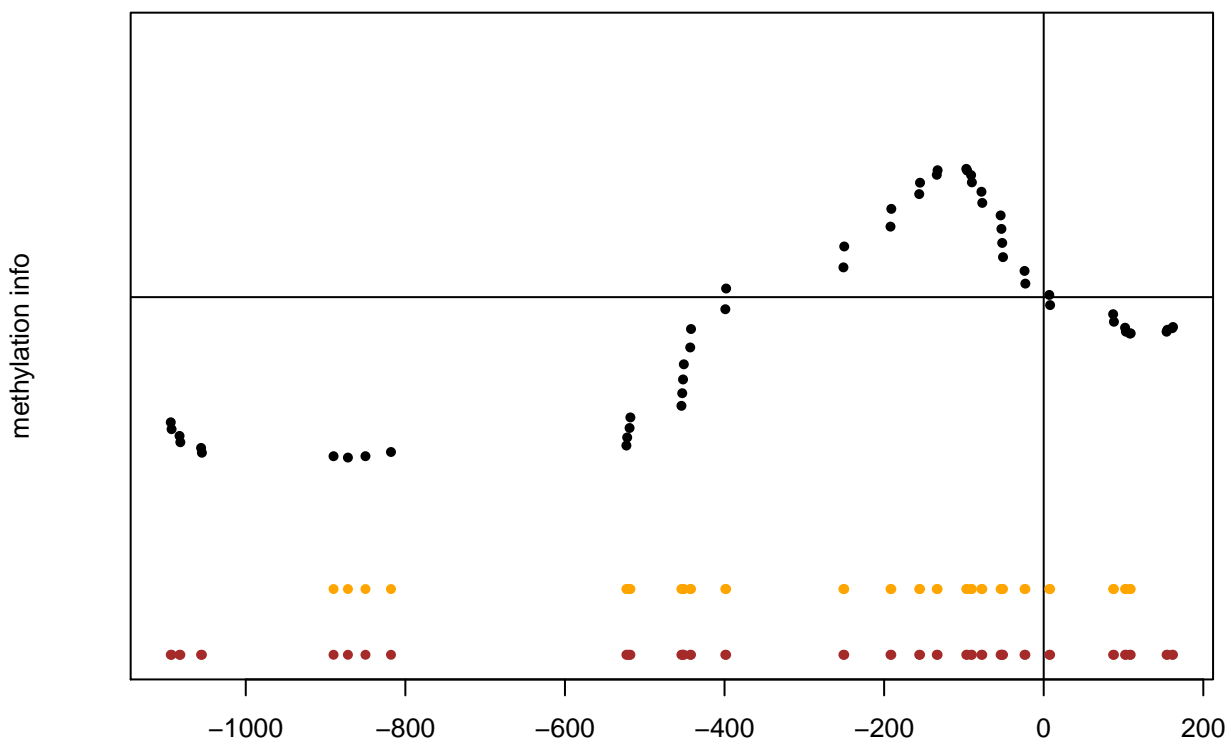

FFAR2 raw %methylation, red=UC, blue=Normal

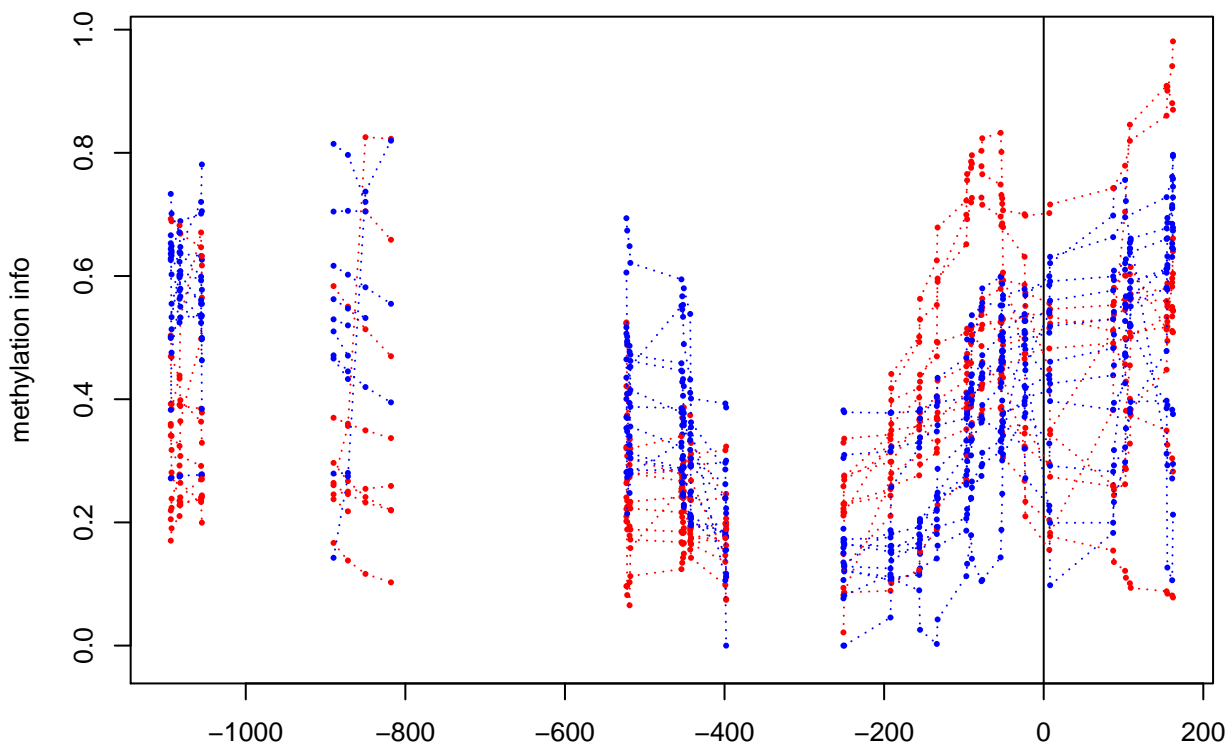

RNAseq logFC(UC-N)= 3.02

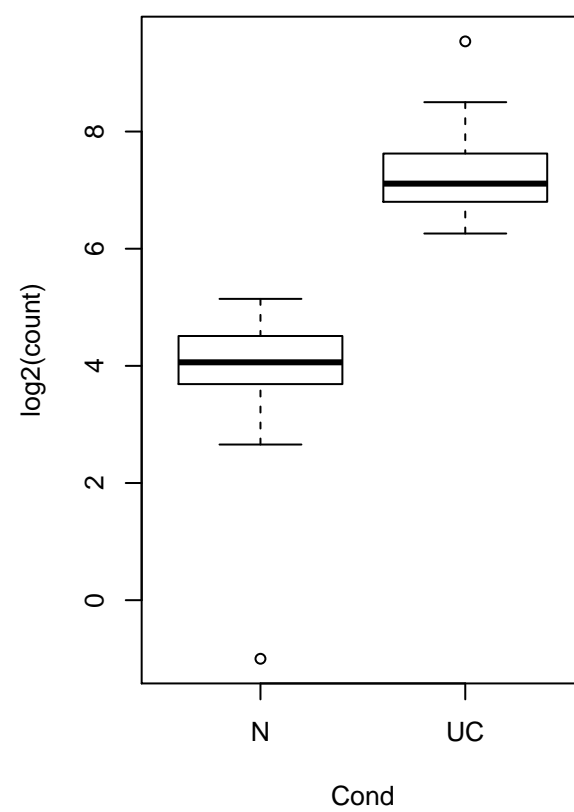

FGD2 average UC-N %methylation max=-10.89% min=-25%

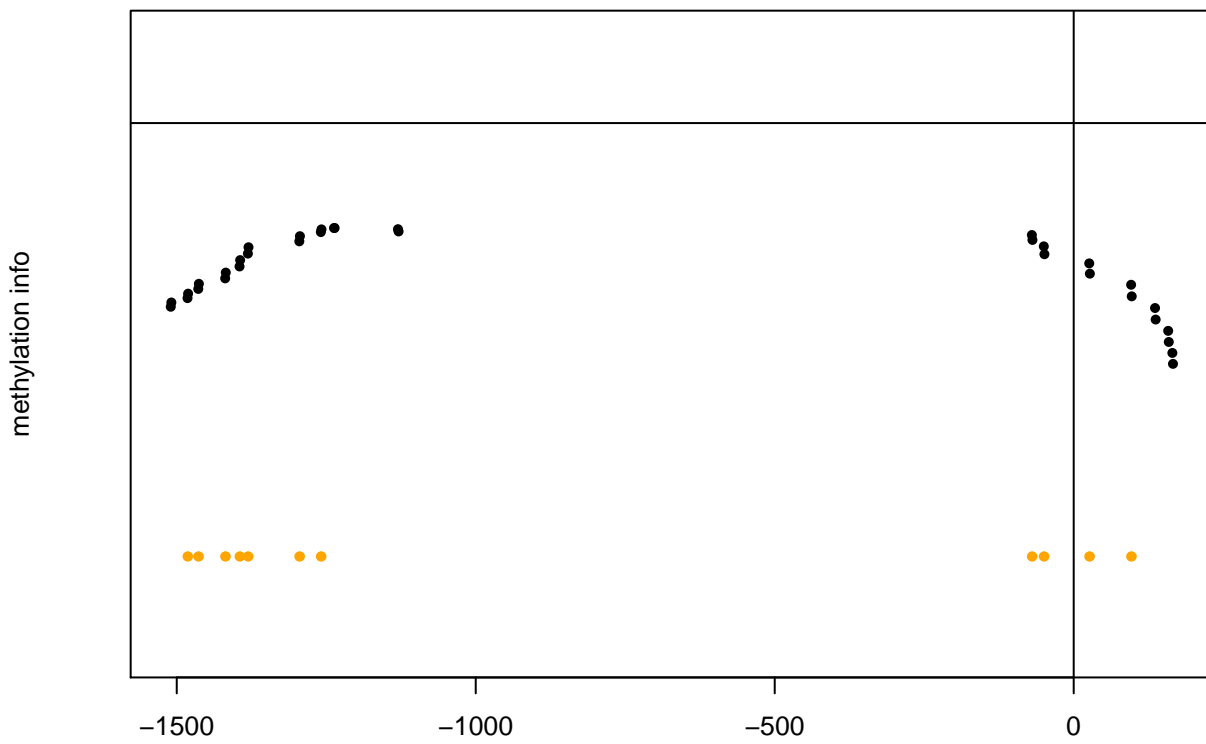

FGD2 raw %methylation, red=UC, blue=Normal

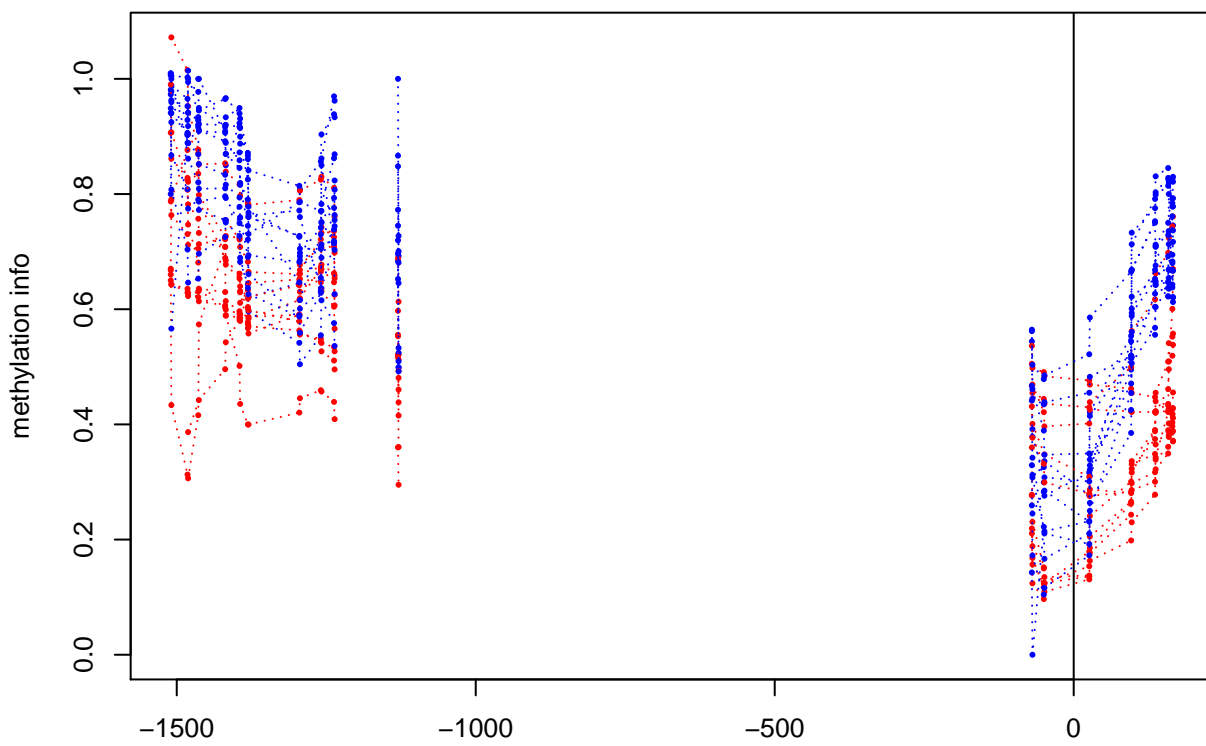

RNAseq logFC(UC-N)= 1.11

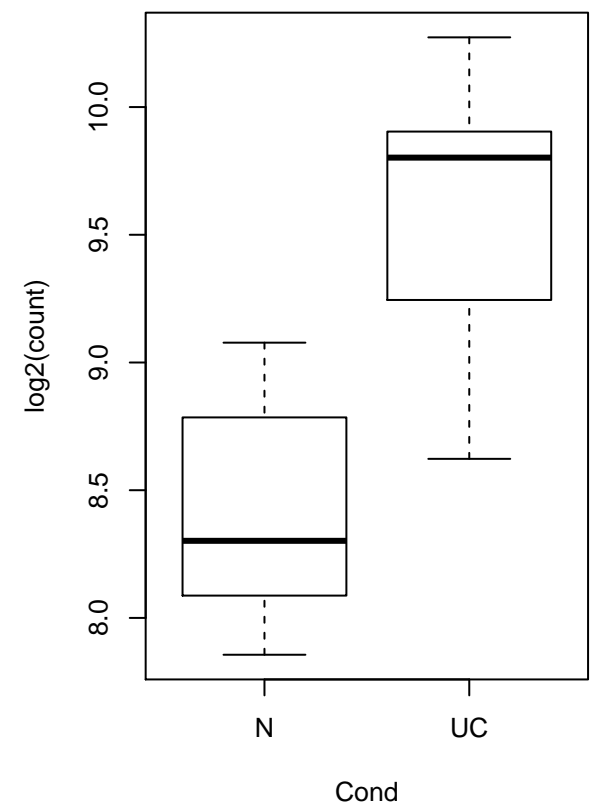

FOXP3 average UC-N %methylation max=1.16% min=-50.87%

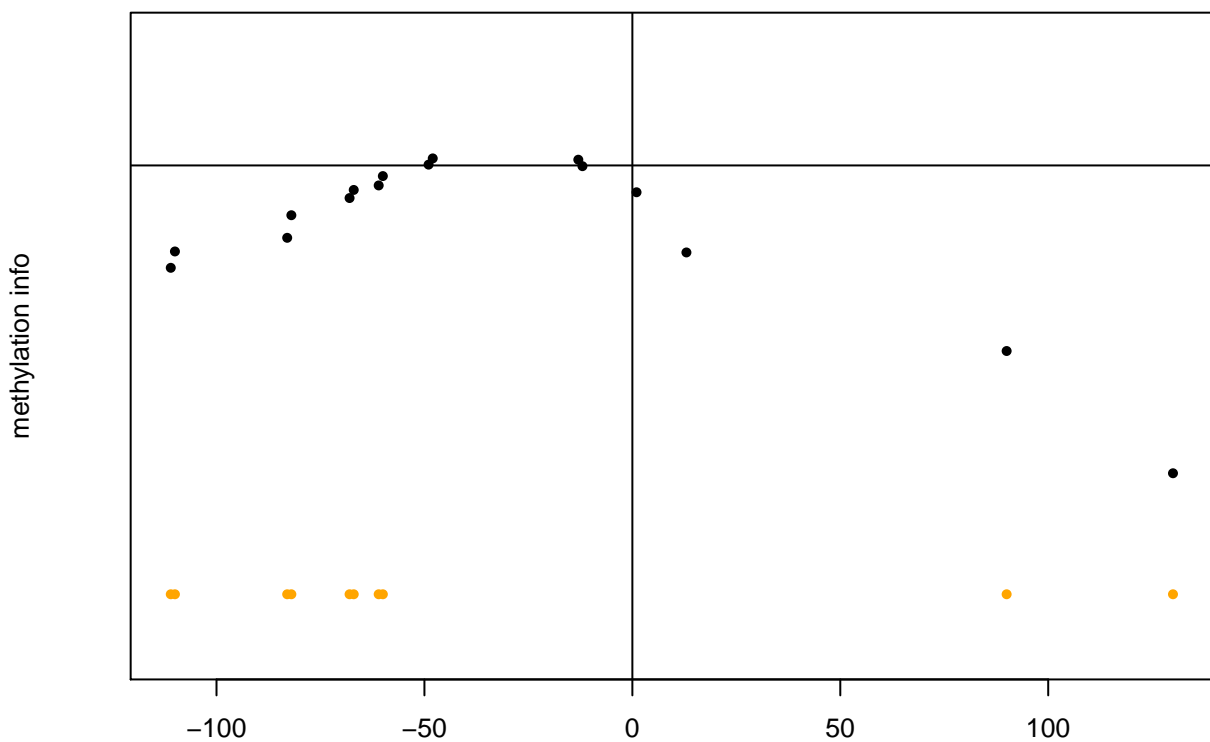

FOXP3 raw %methylation, red=UC, blue=Normal

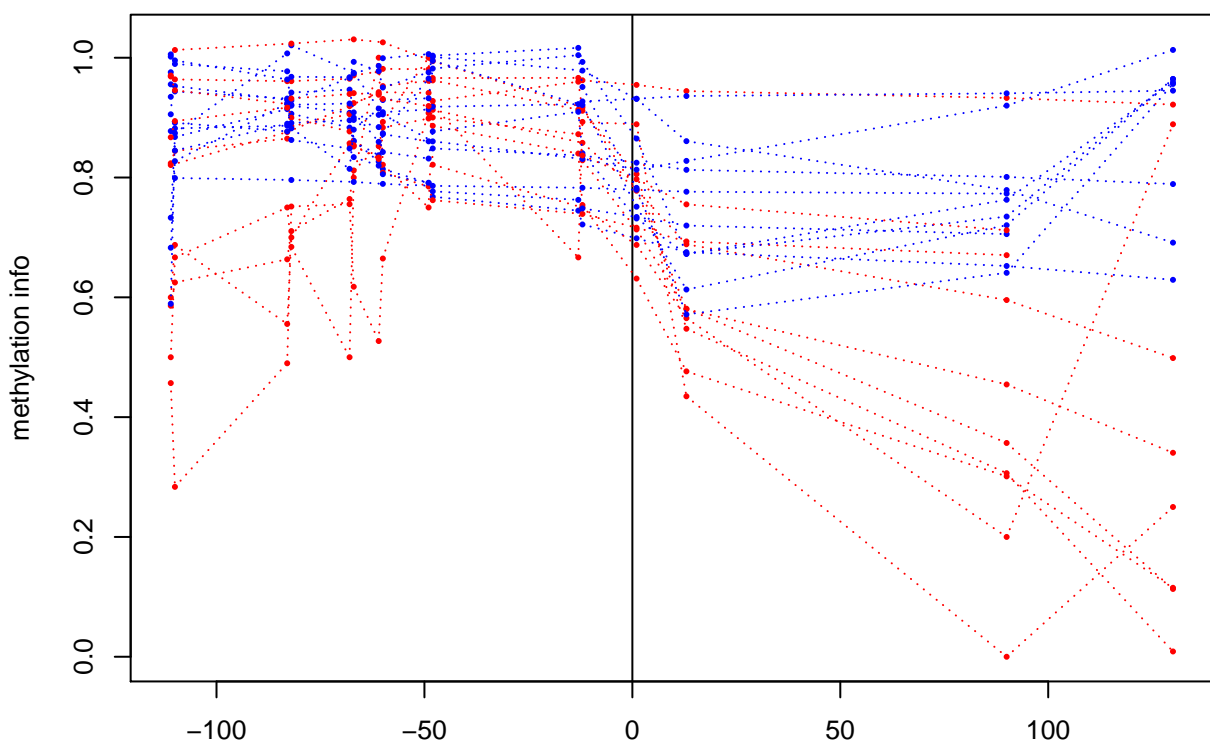

RNAseq logFC(UC-N)= 2.11

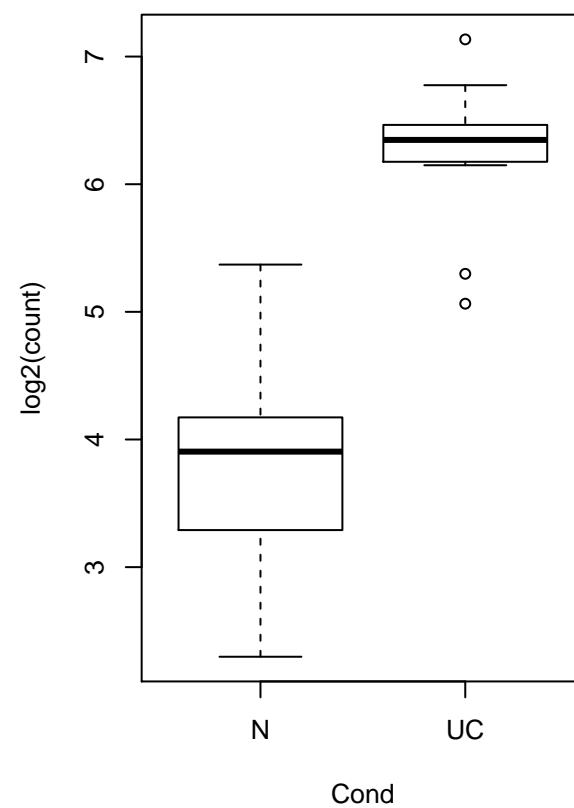

FRAS1 average UC-N %methylation max=40.31% min=-3.58%

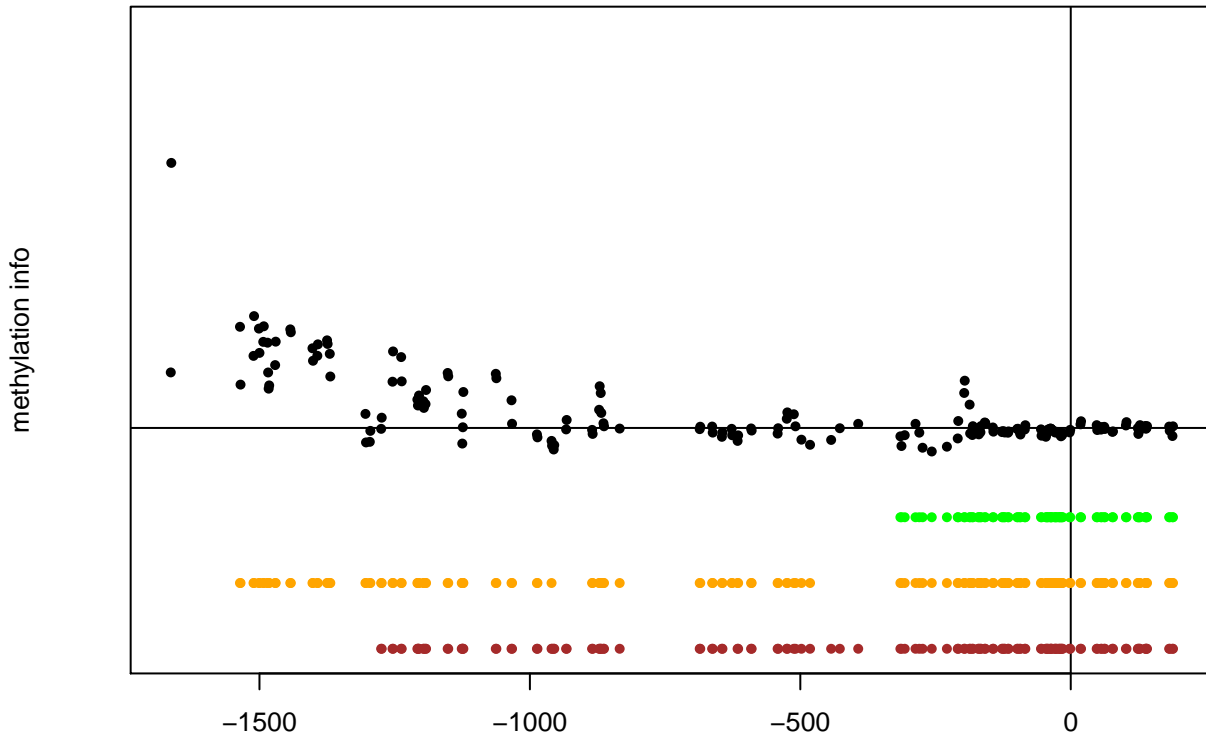

FRAS1 raw %methylation, red=UC, blue=Normal

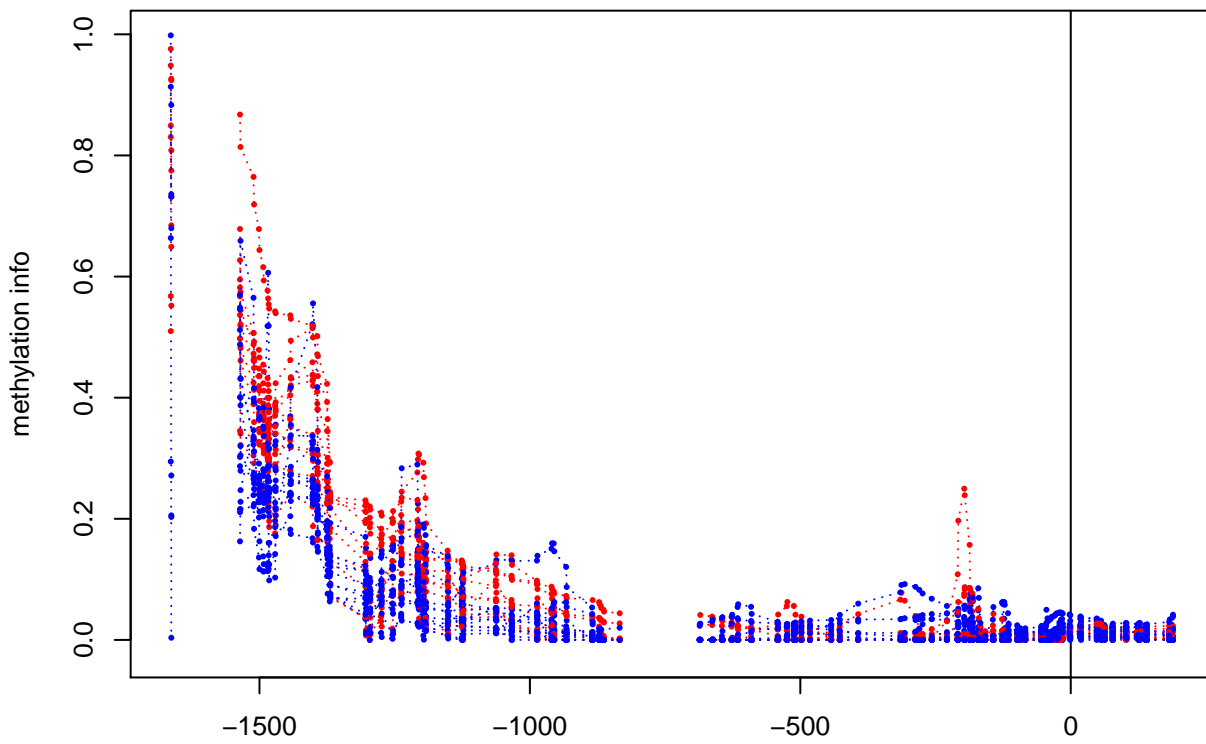

RNAseq logFC(UC-N) = -1.23

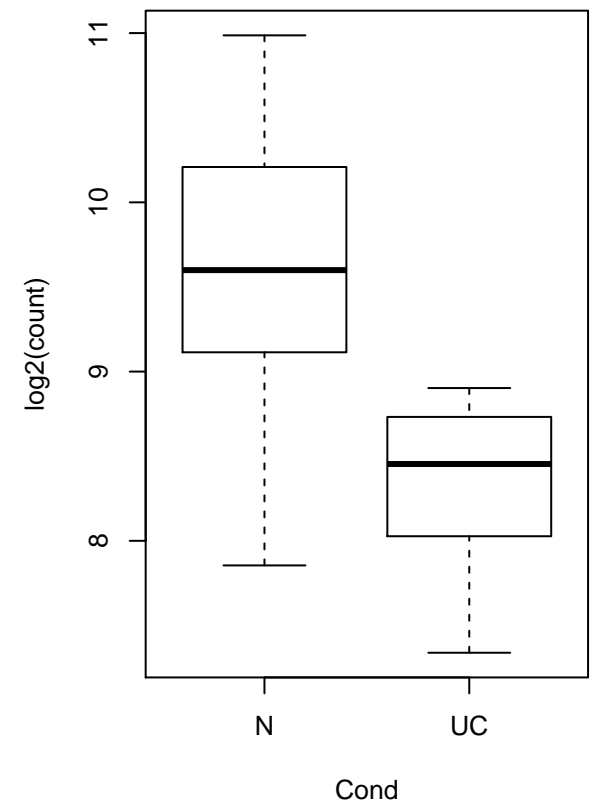

FRMD1 average UC-N %methylation max=22.98% min=-5.74%

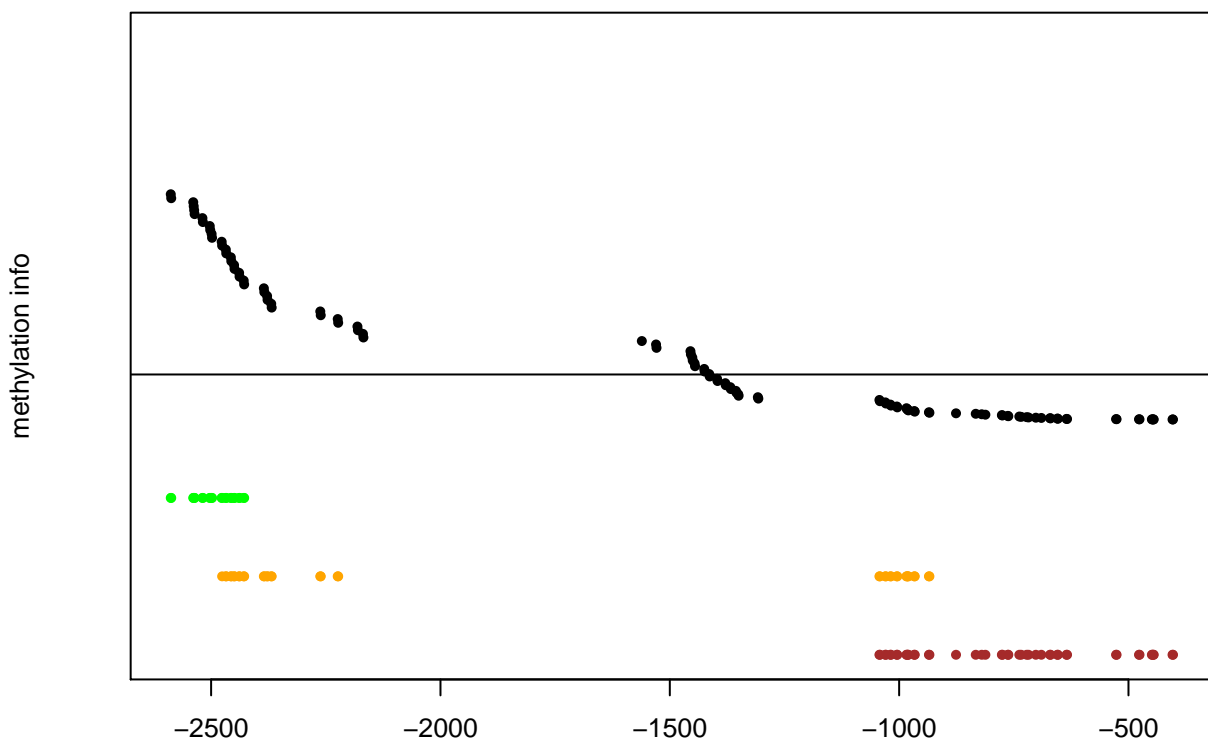

FRMD1 raw %methylation, red=UC, blue=Normal

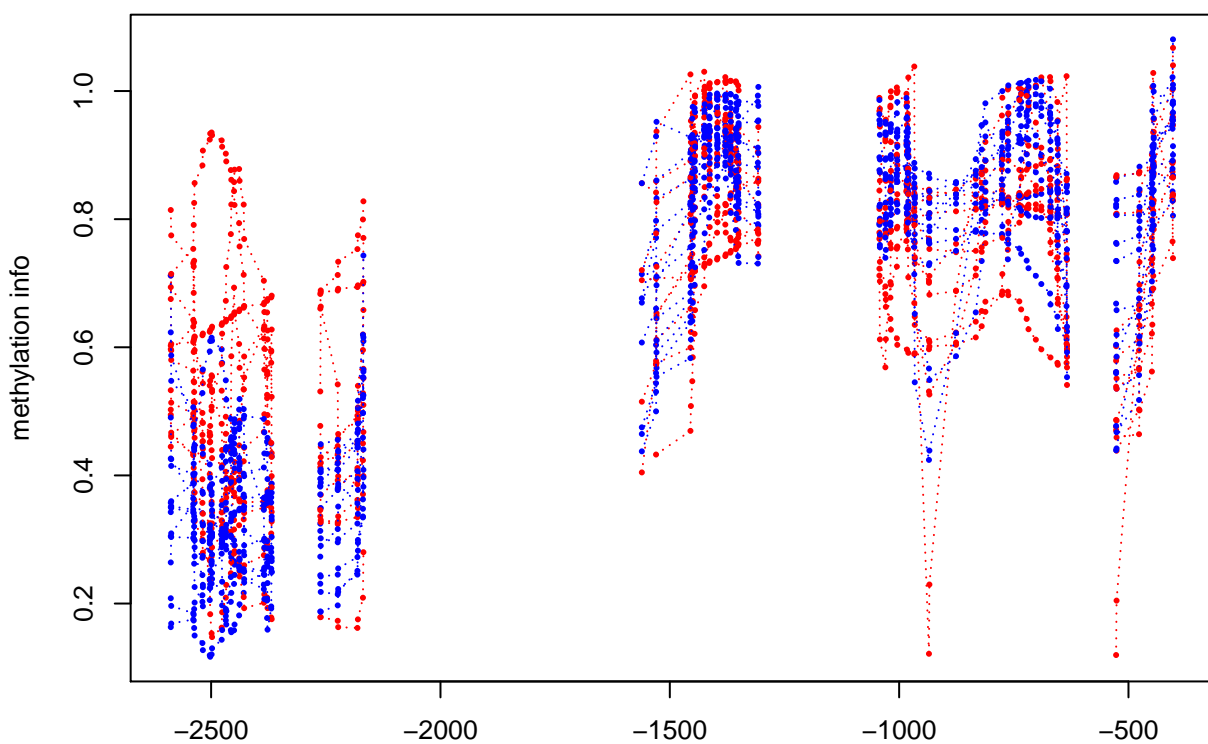

RNAseq logFC(UC-N) = -2.26

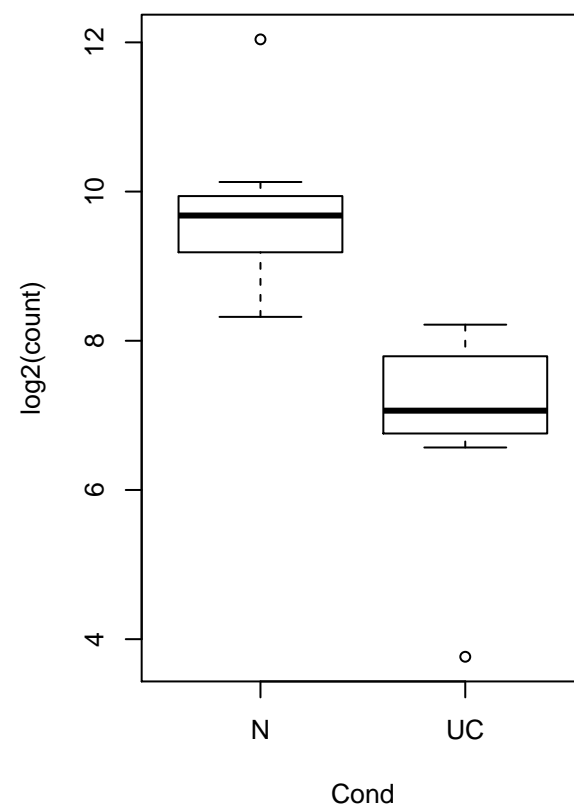



**FXVD3 average UC-N %methylation max=21.33% min=-1.7%**

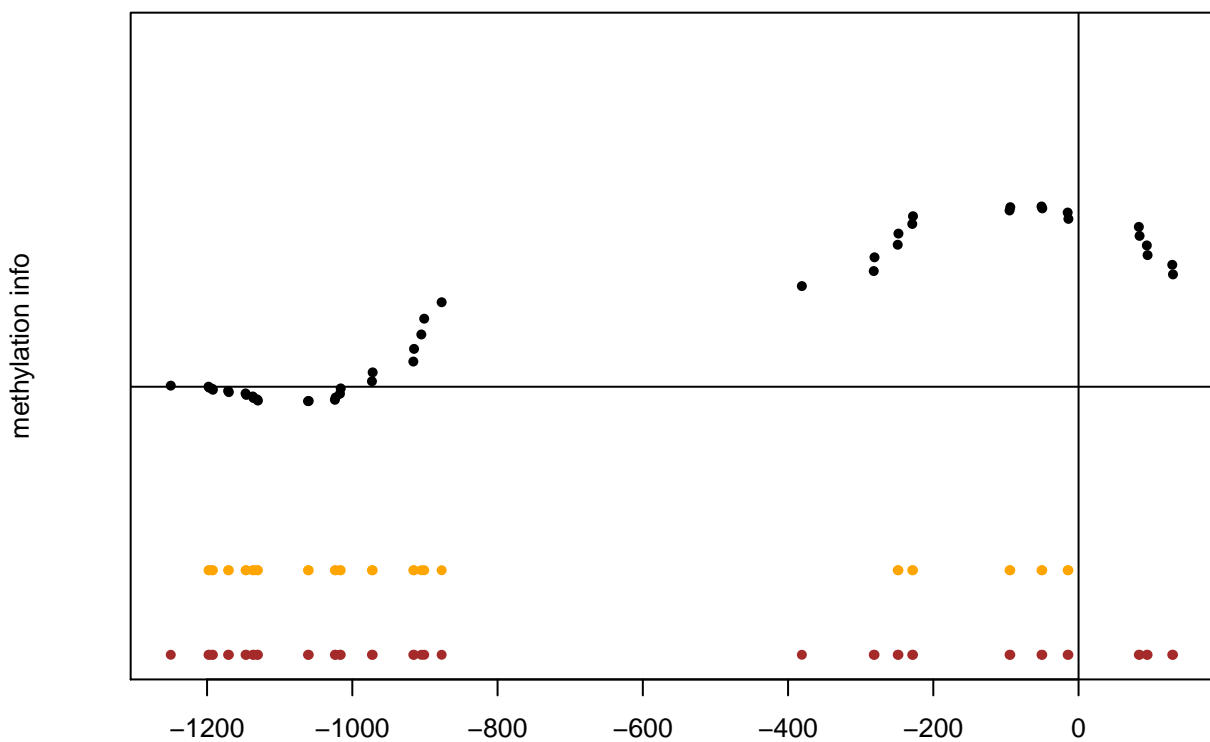

**FXVD3 raw %methylation, red=UC, blue=Normal**

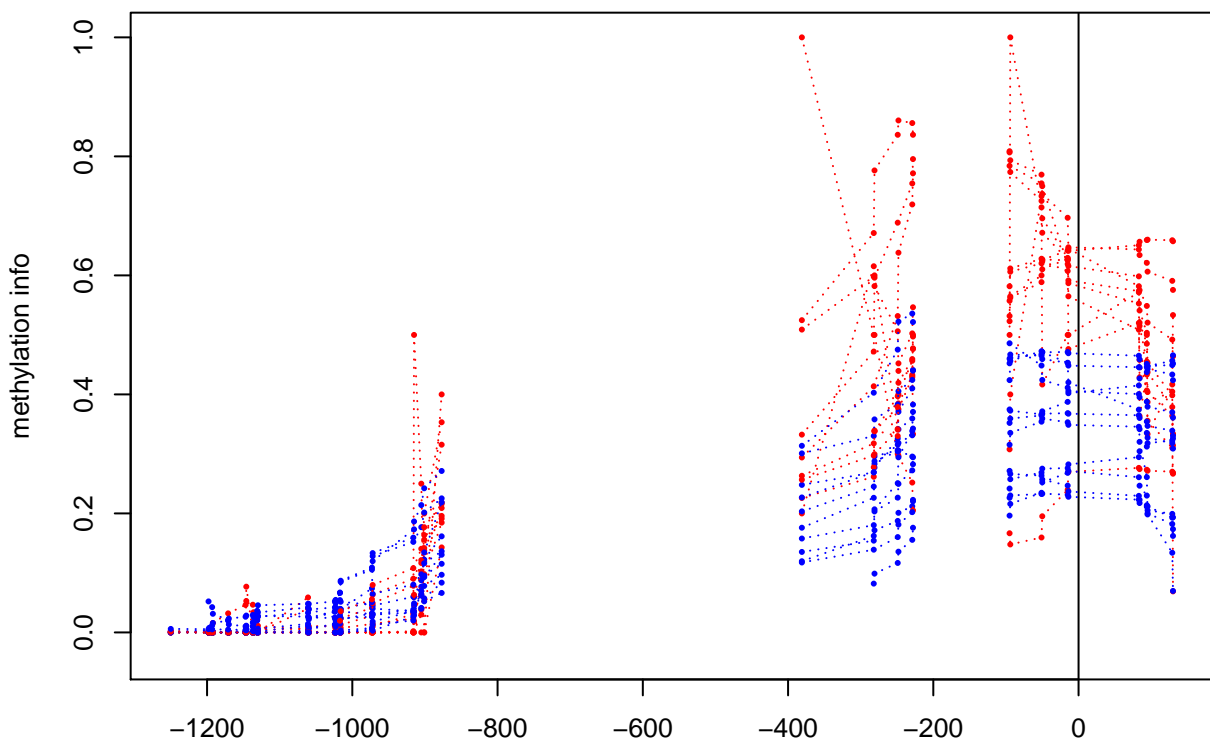

**RNAseq logFC(UC-N)= -1.35**

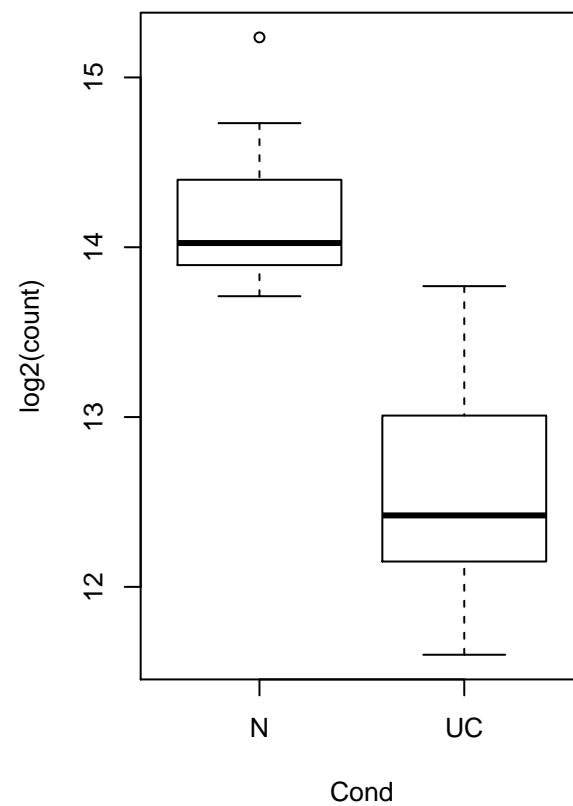

GABRP average UC-N %methylation max=-8.23% min=-12.35%

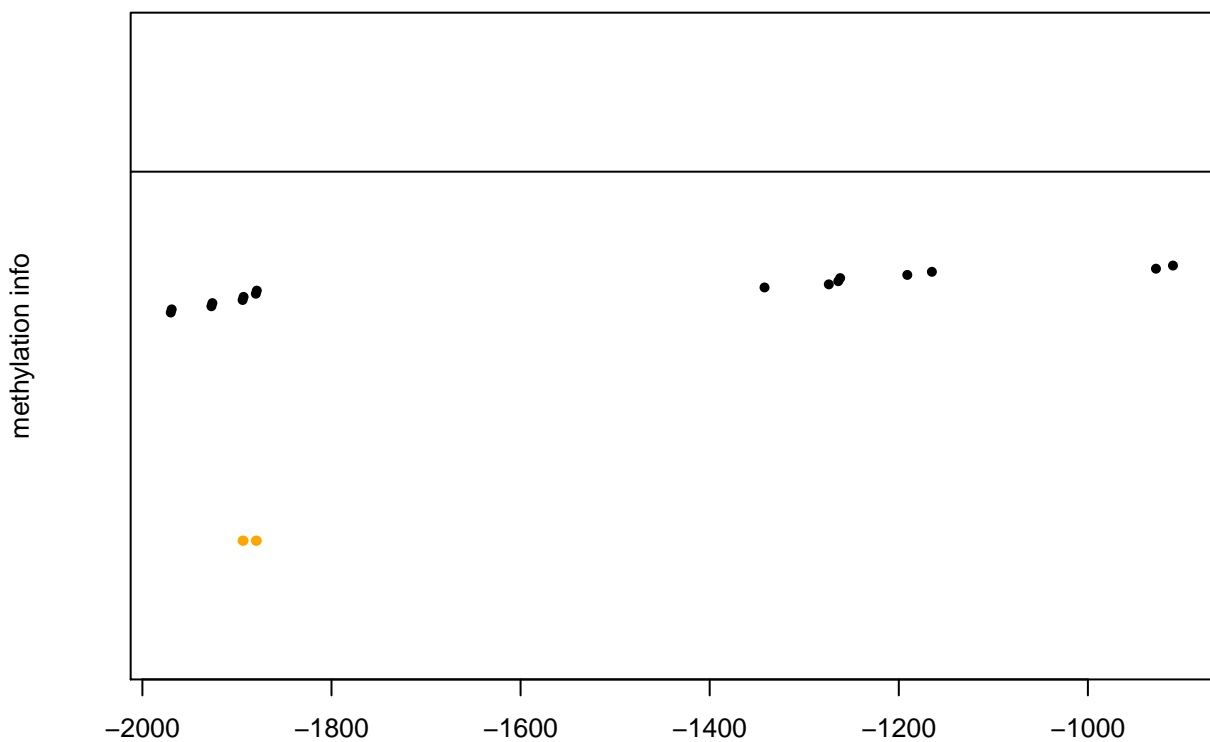

GABRP raw %methylation, red=UC, blue=Normal

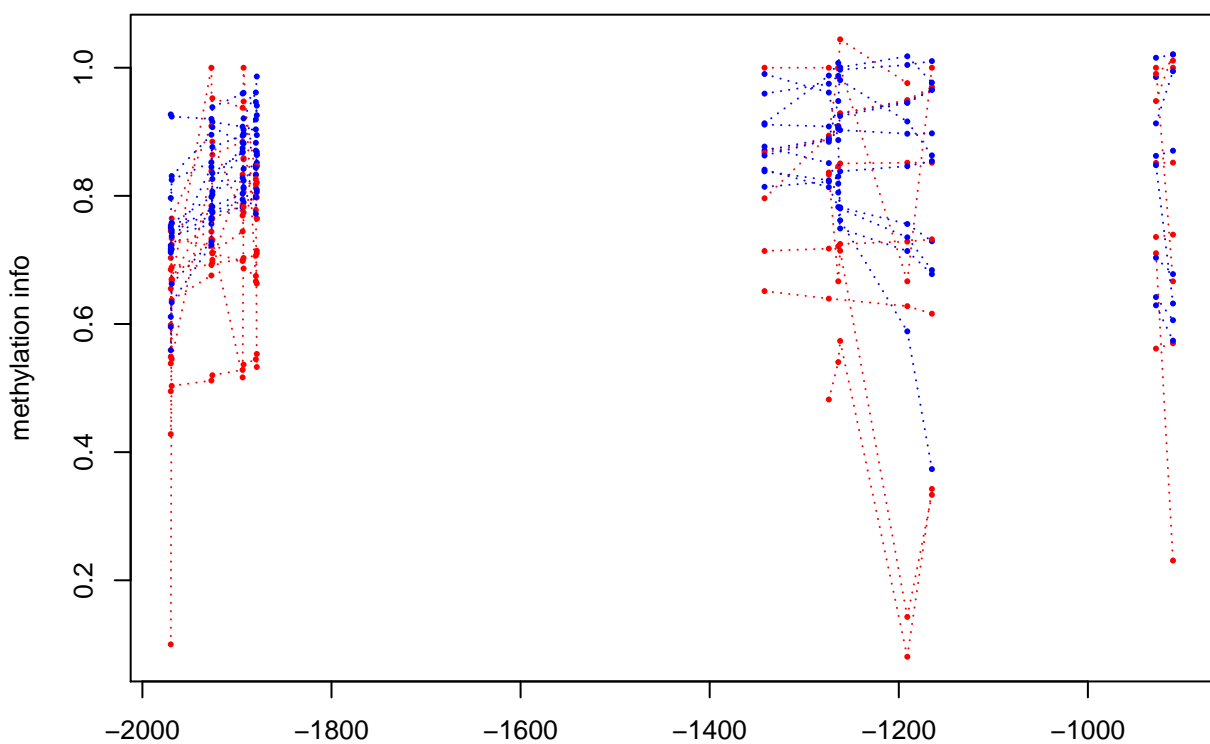

RNAseq logFC(UC-N)= 3.72

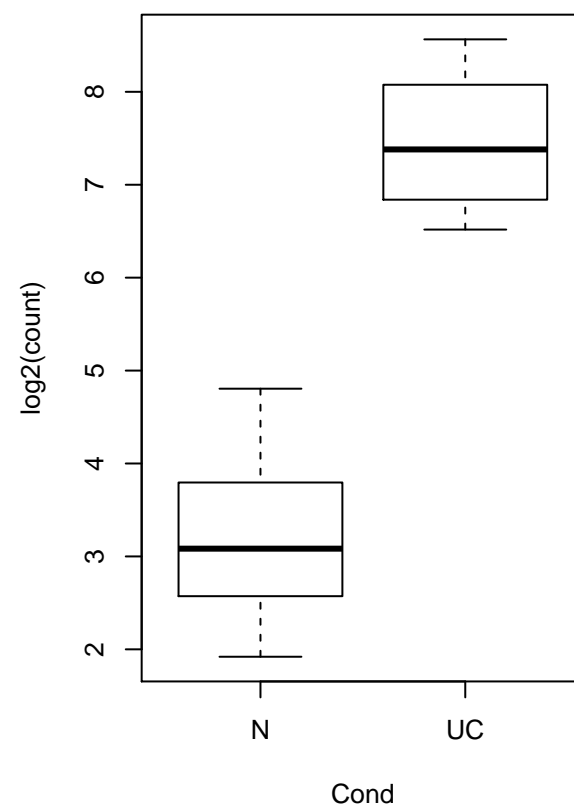

GAPT average UC-N %methylation max=-14.78% min=-35.32%

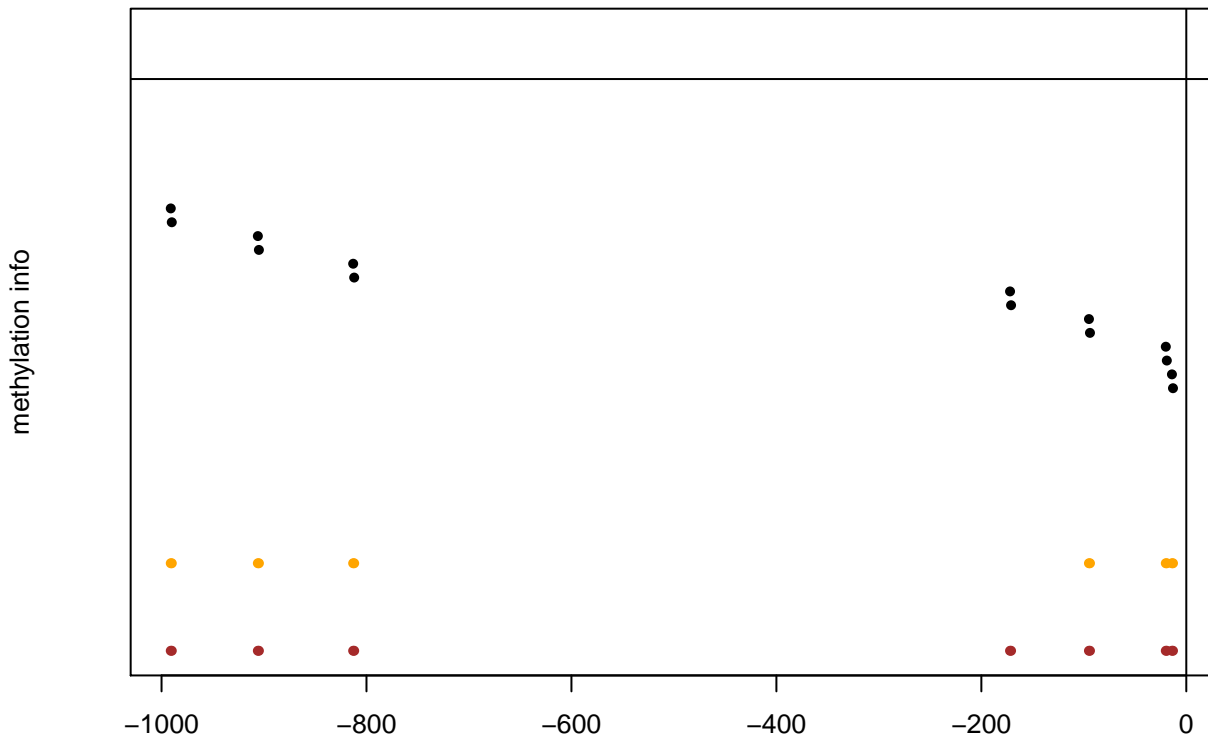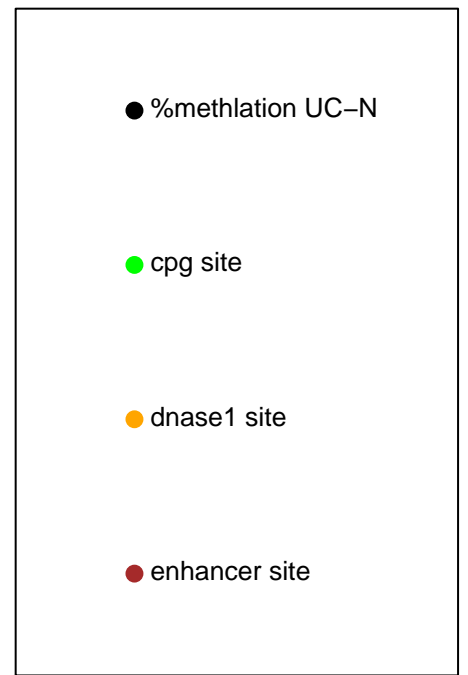

GAPT raw %methylation, red=UC, blue=Normal

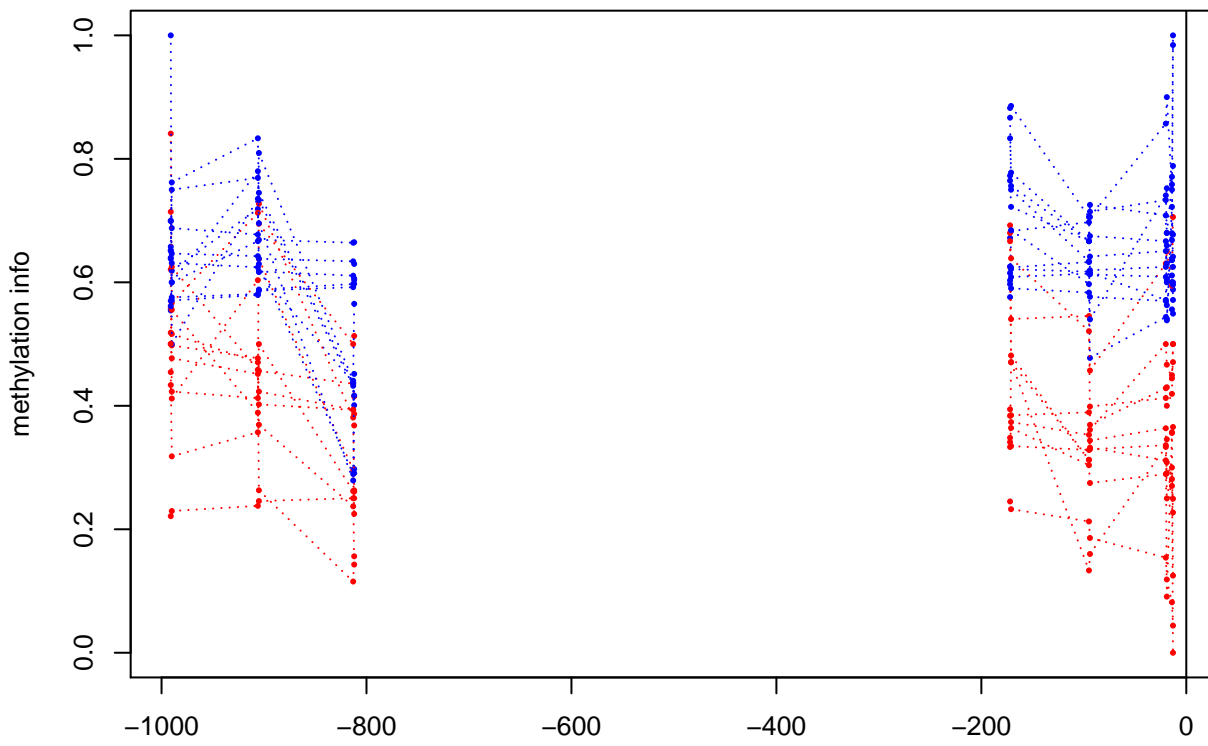

RNAseq logFC(UC-N)= 1.22

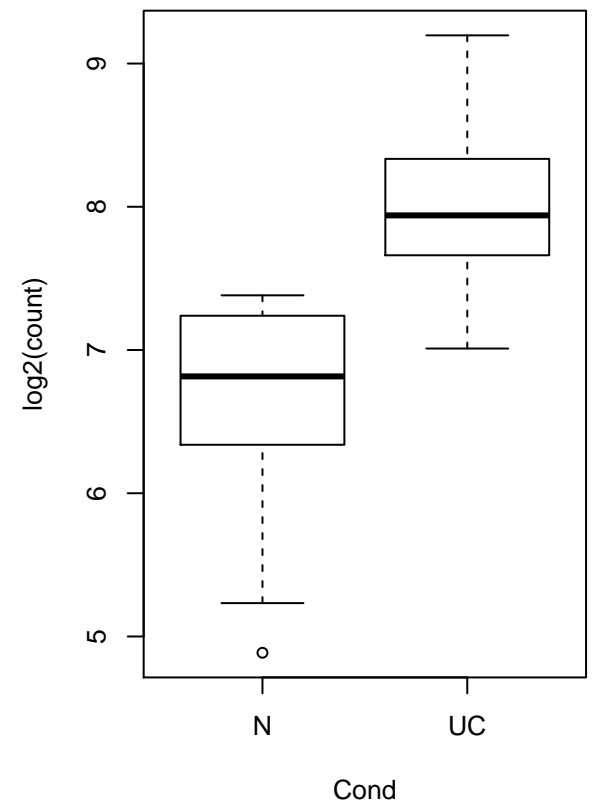

GBA3 average UC-N %methylation max=19.08% min=-10.32%

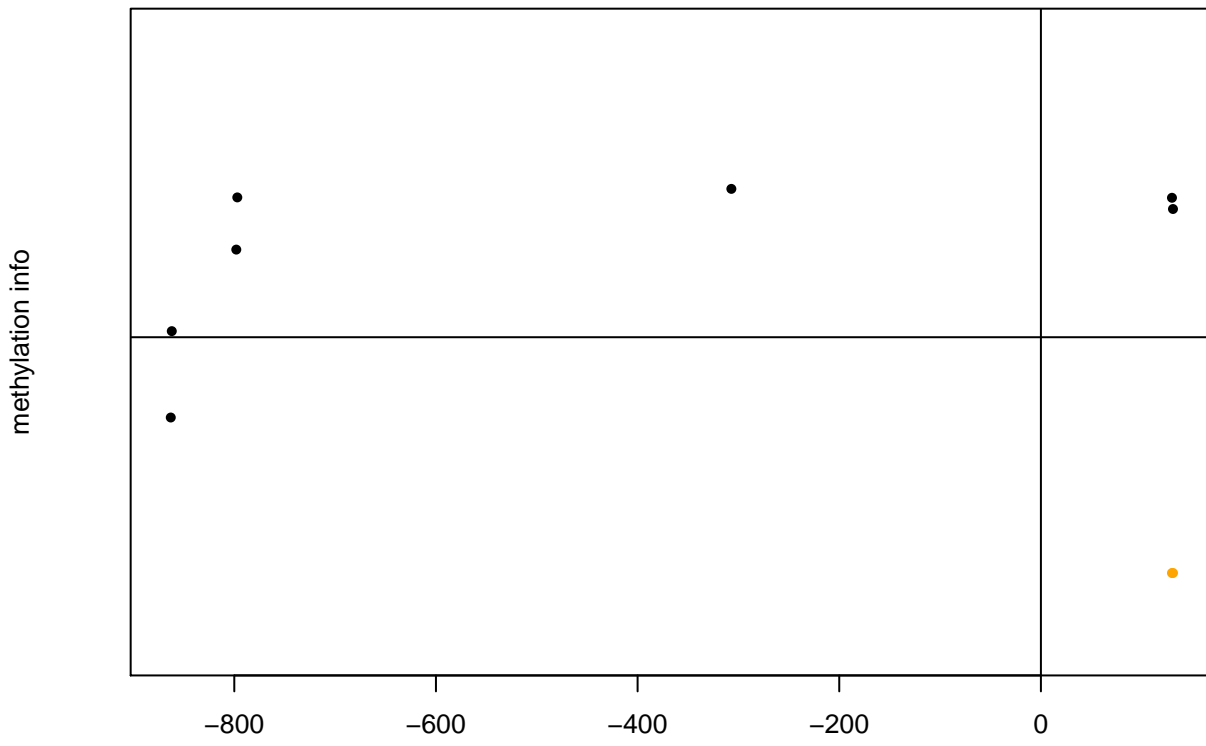

GBA3 raw %methylation, red=UC, blue=Normal

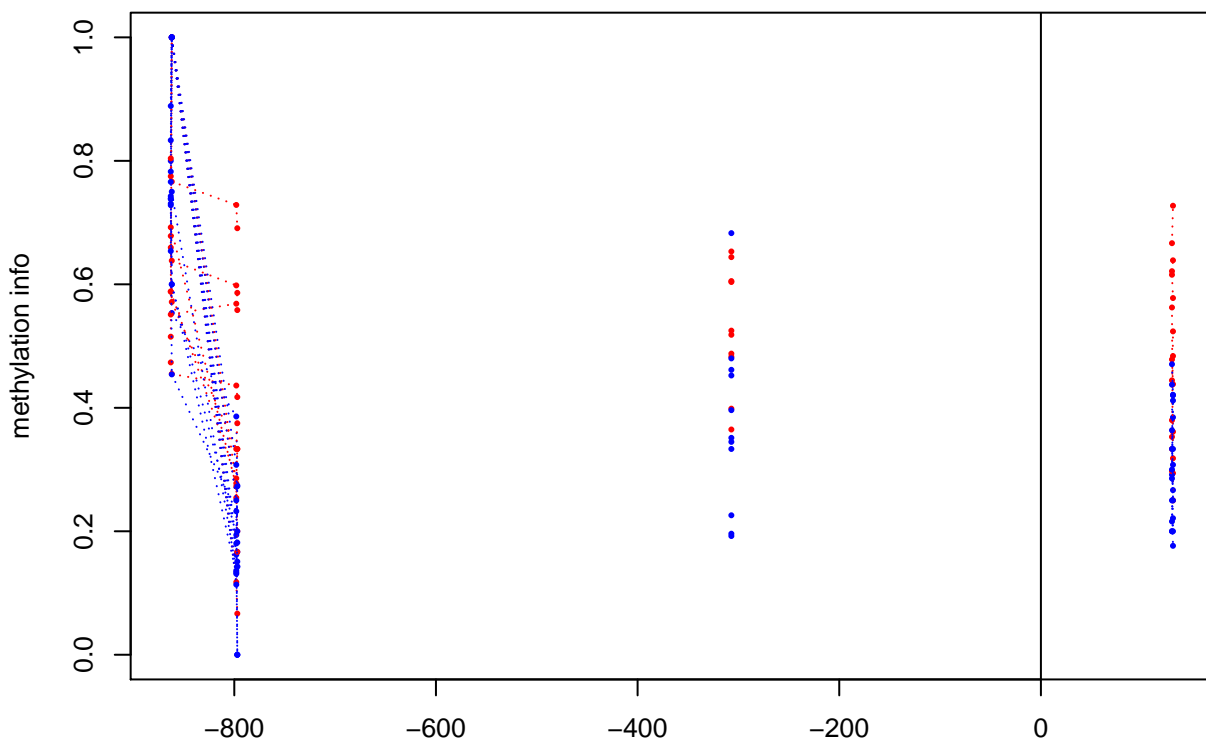

RNAseq logFC(UC-N)= -1.98

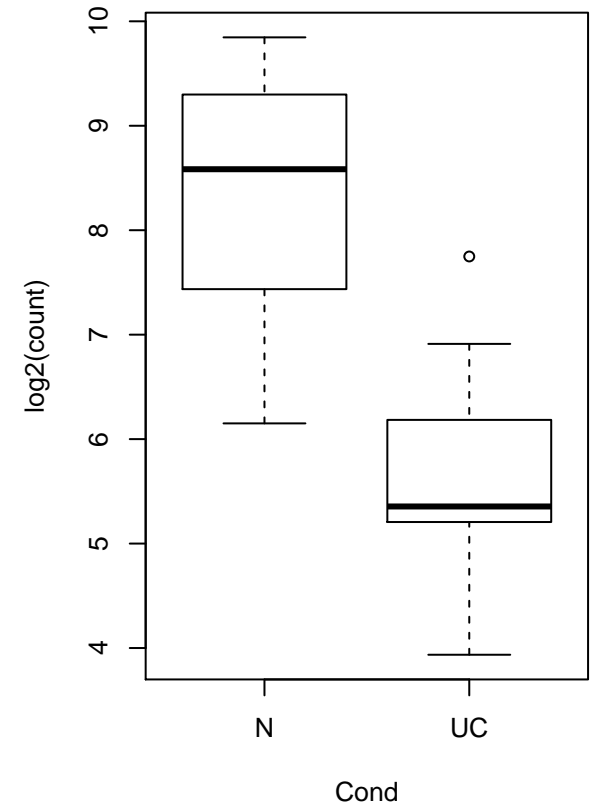

GBP4 average UC-N %methylation max=-0.4% min=-12.97%

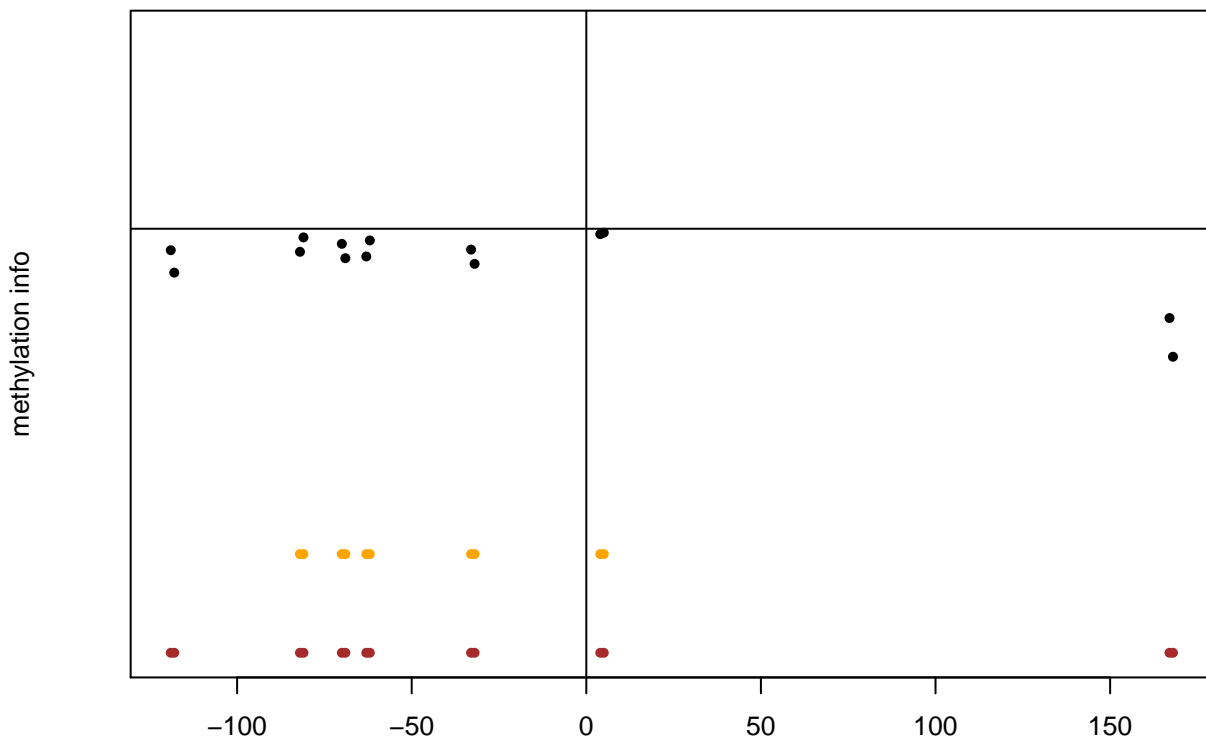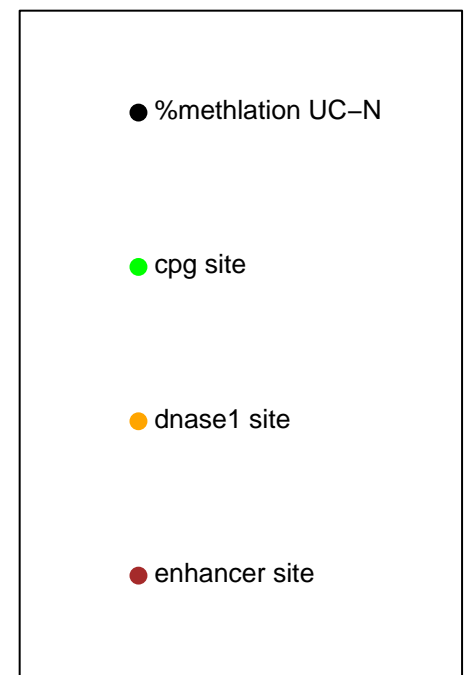

GBP4 raw %methylation, red=UC, blue=Normal

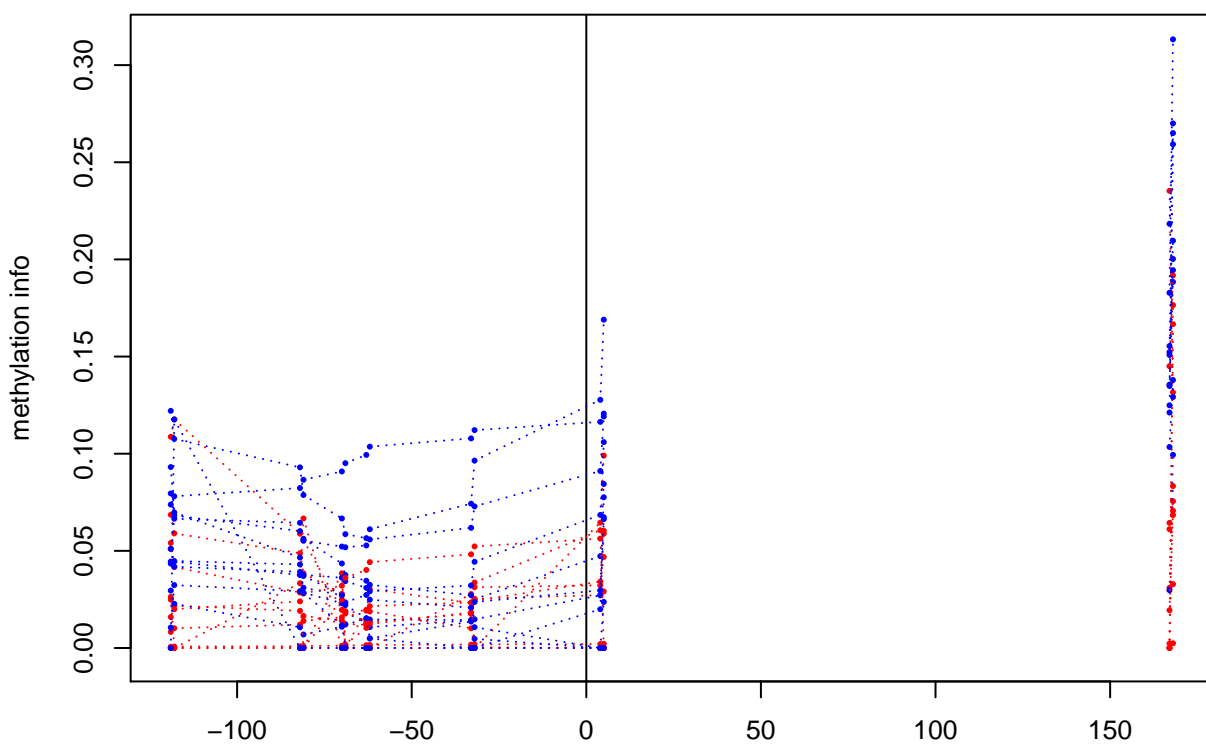

RNAseq logFC(UC-N)= 1.74

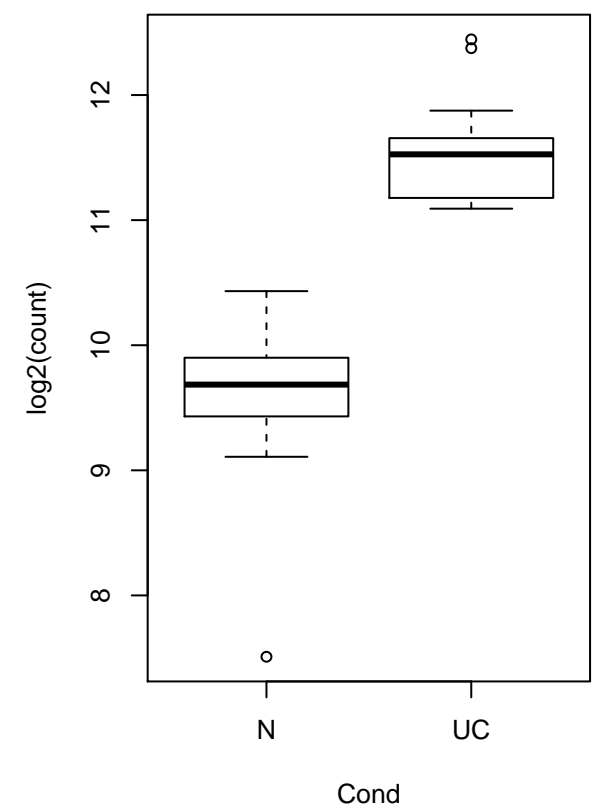

GBP5 average UC-N %methylation max=-9.39% min=-40.48%

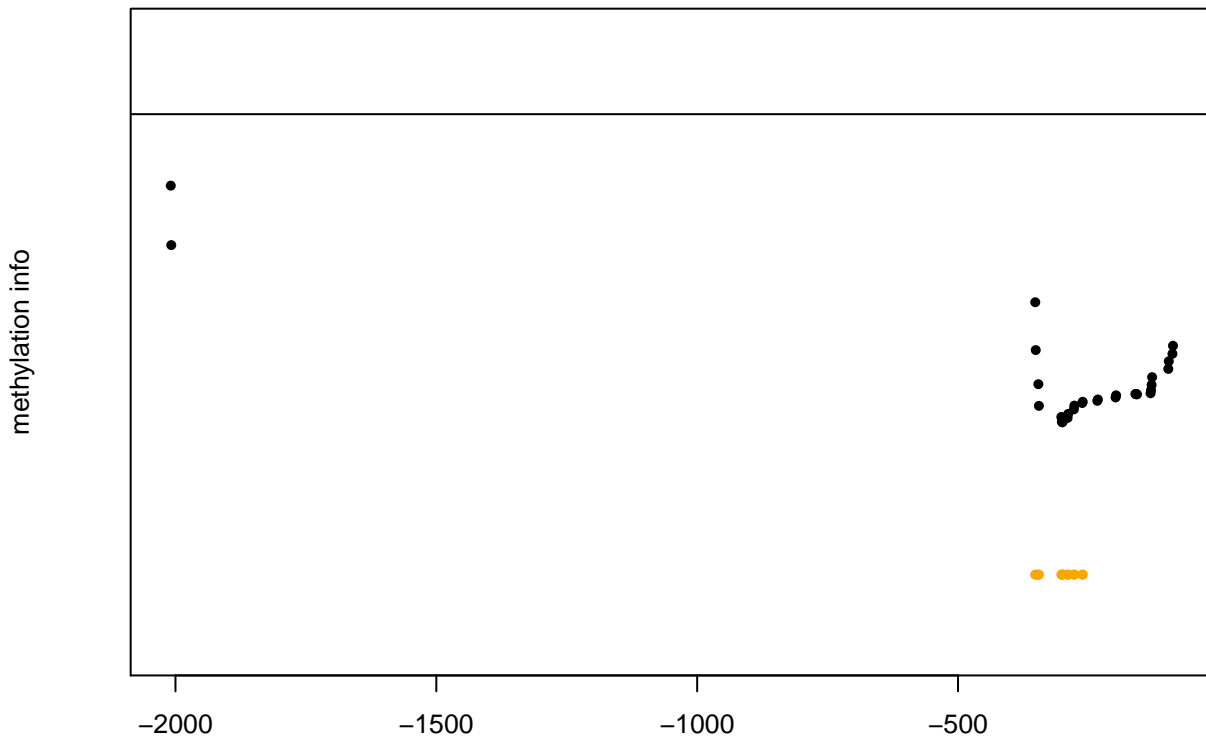

GBP5 raw %methylation, red=UC, blue=Normal

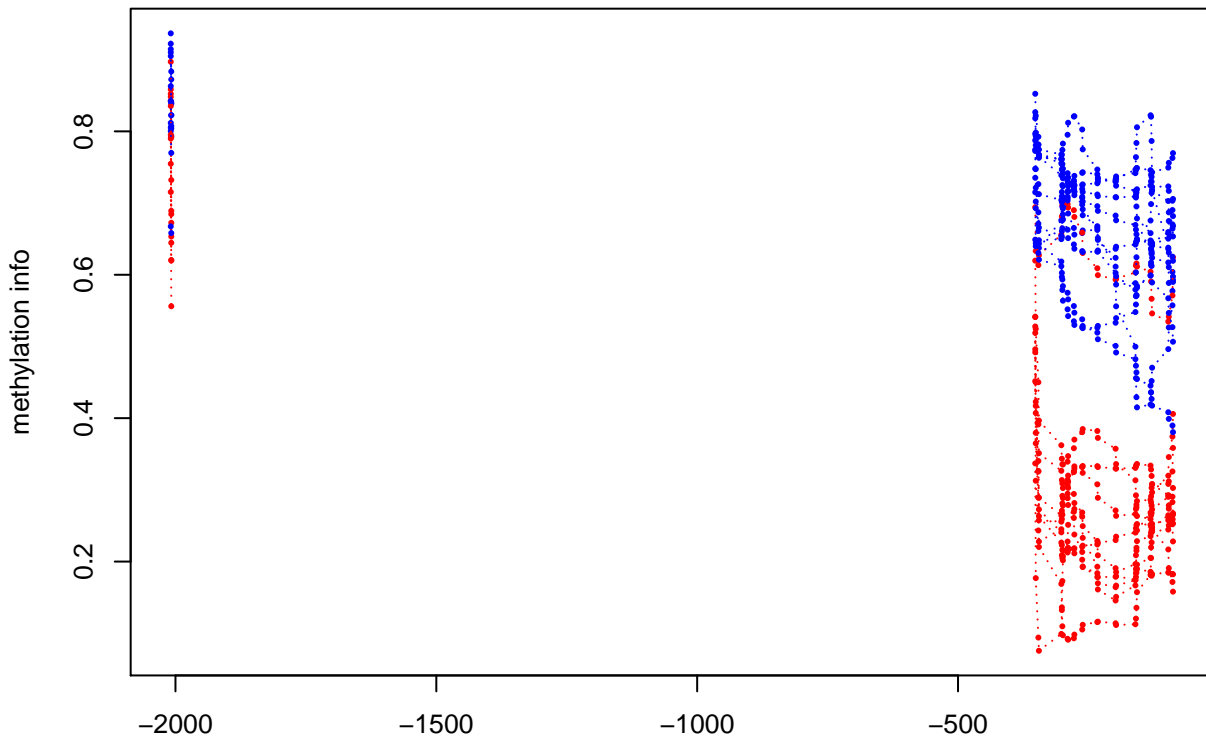

RNAseq logFC(UC-N)= 2.22

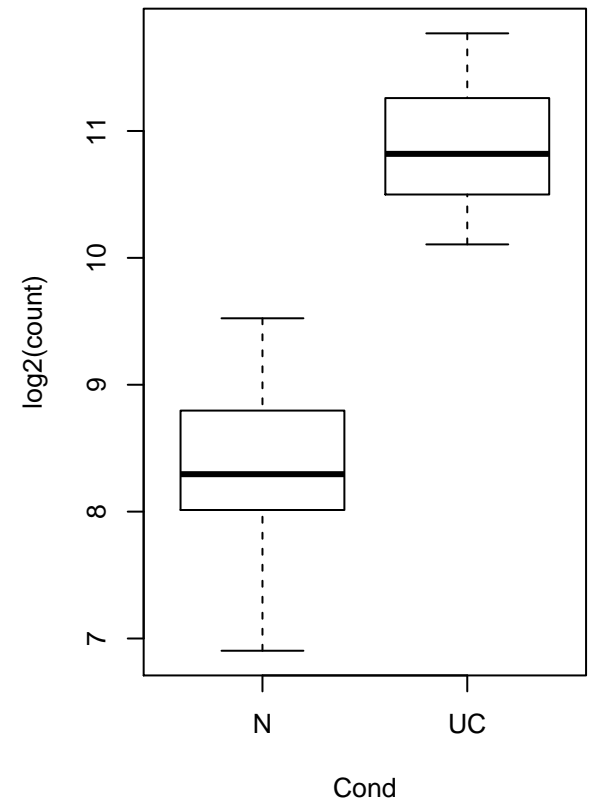

GPR132 average UC-N %methylation max=-3.73% min=-22.61%

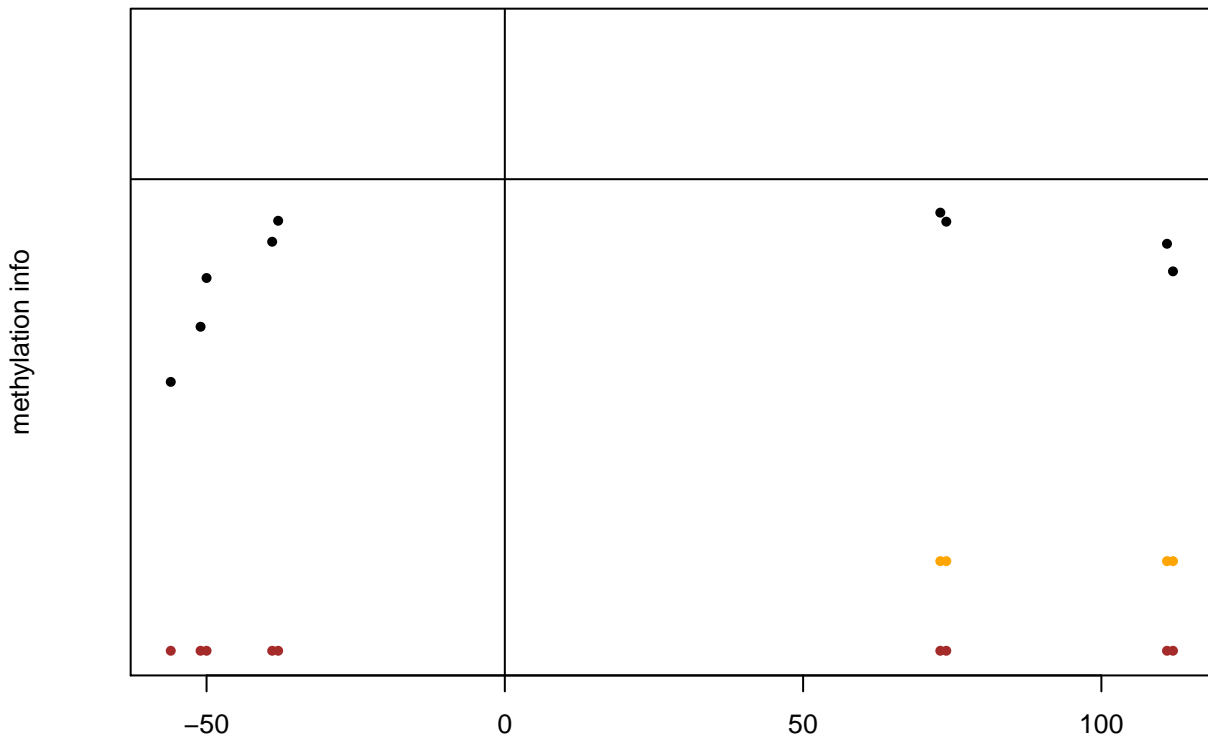

GPR132 raw %methylation, red=UC, blue=Normal

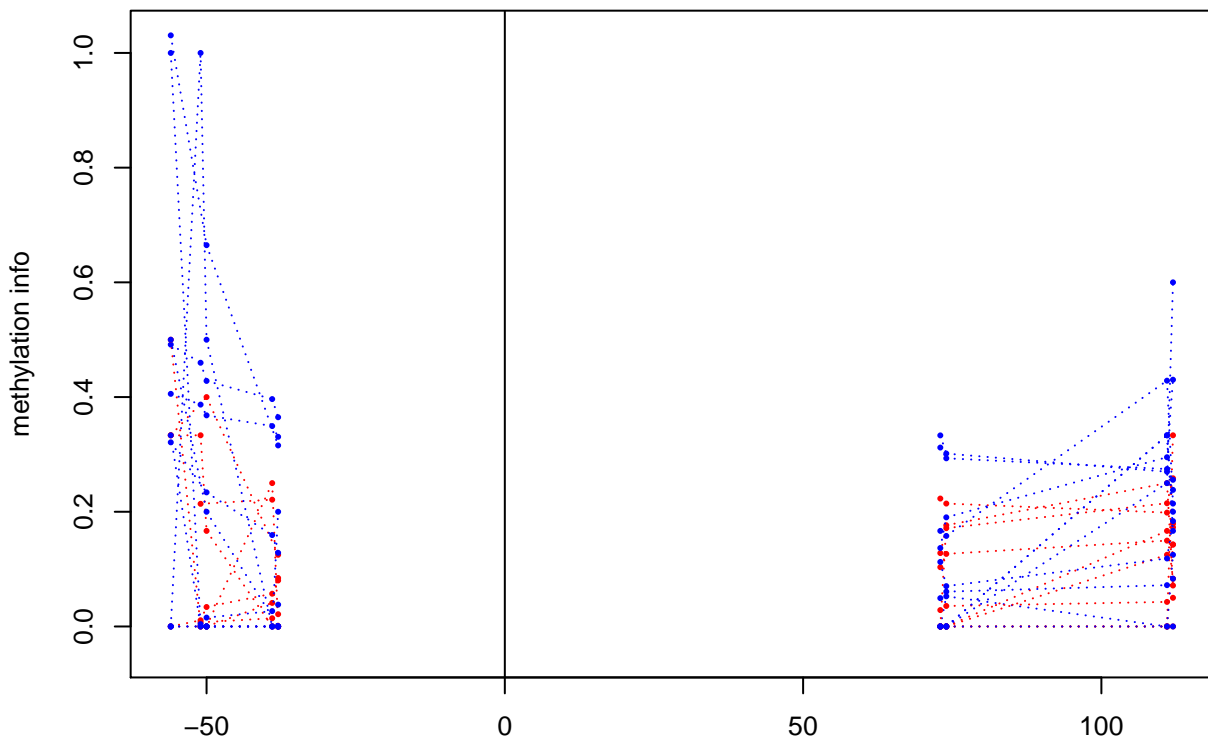

RNAseq logFC(UC-N)= 1.4

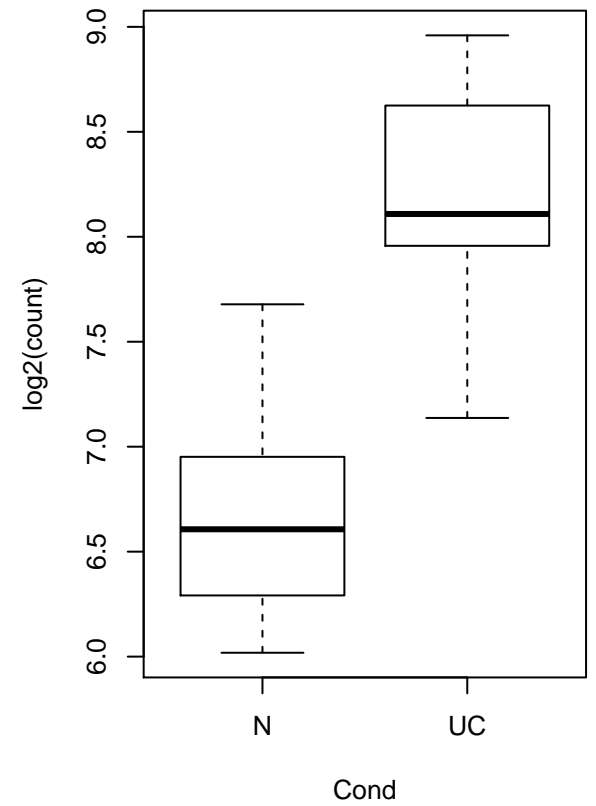

GPR171 average UC-N %methylation max=-30.02% min=-31.26%

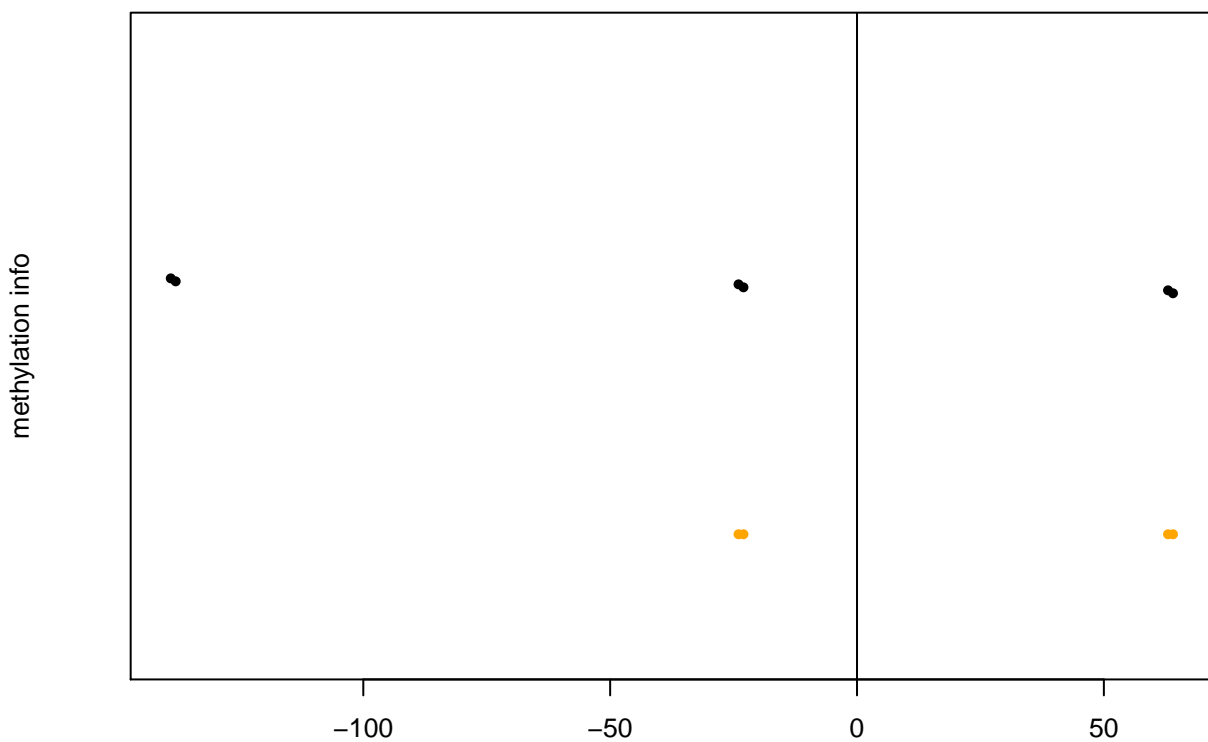

GPR171 raw %methylation, red=UC, blue=Normal

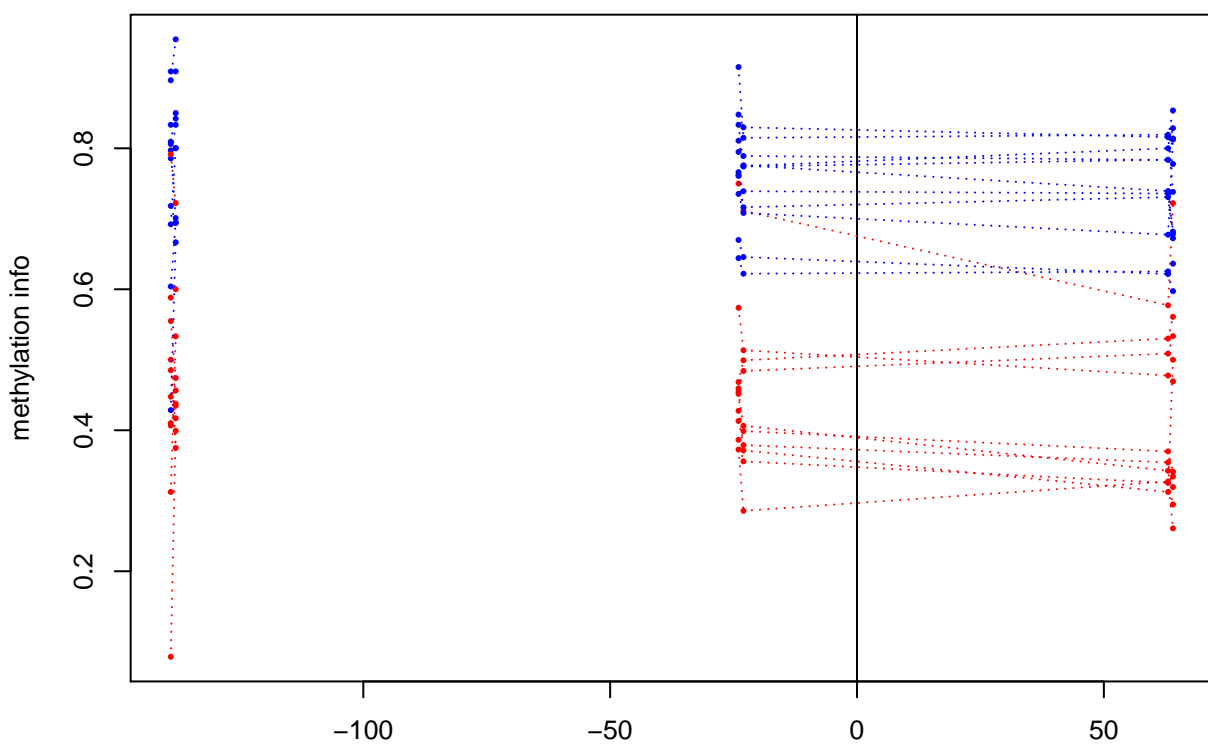

RNAseq logFC(UC-N)= 1.1

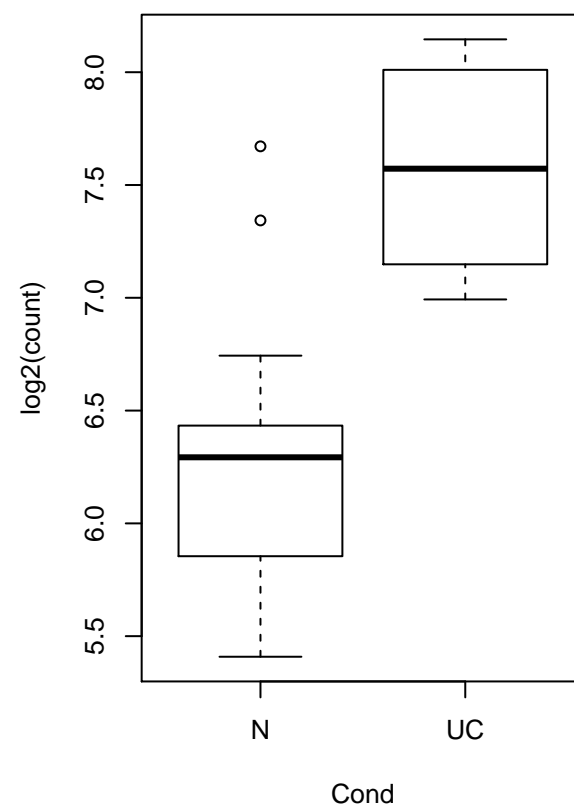



GPX7 average UC-N %methylation max=0.8% min=-18.35%

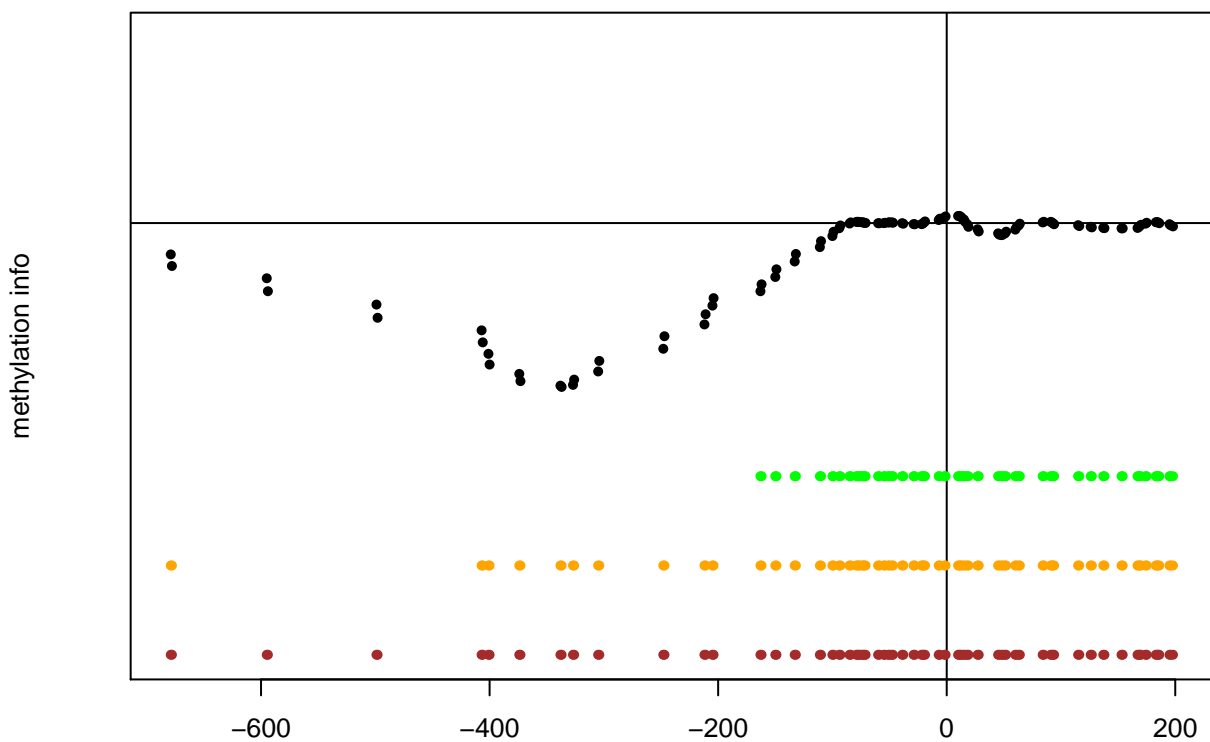

GPX7 raw %methylation, red=UC, blue=Normal

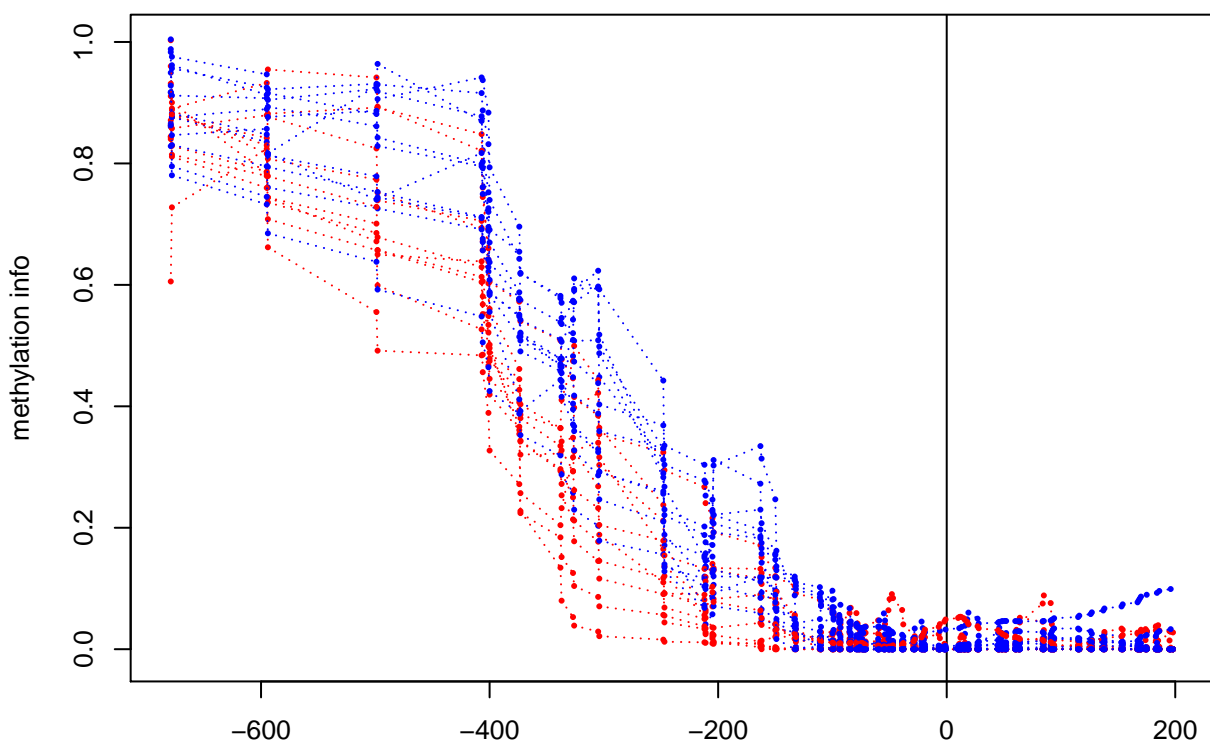

RNAseq logFC(UC-N)= 1.5

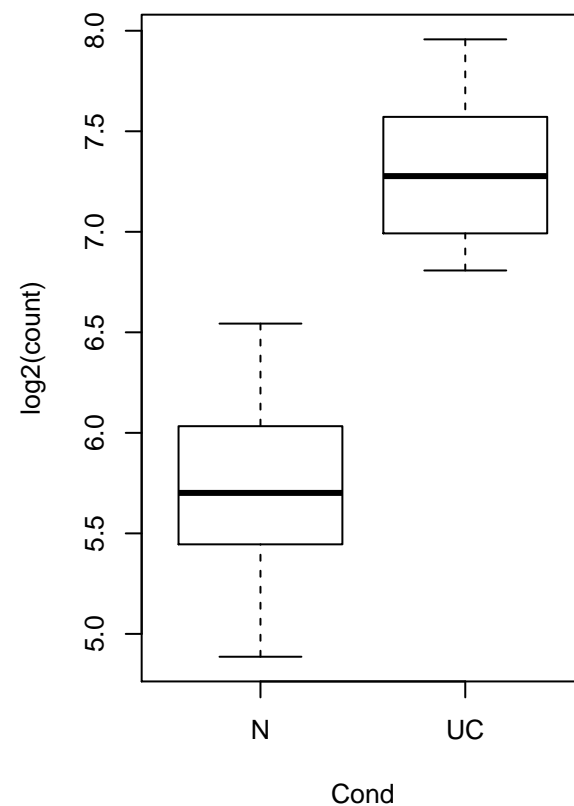

GREM1 average UC-N %methylation max=3.82% min=-24.59%

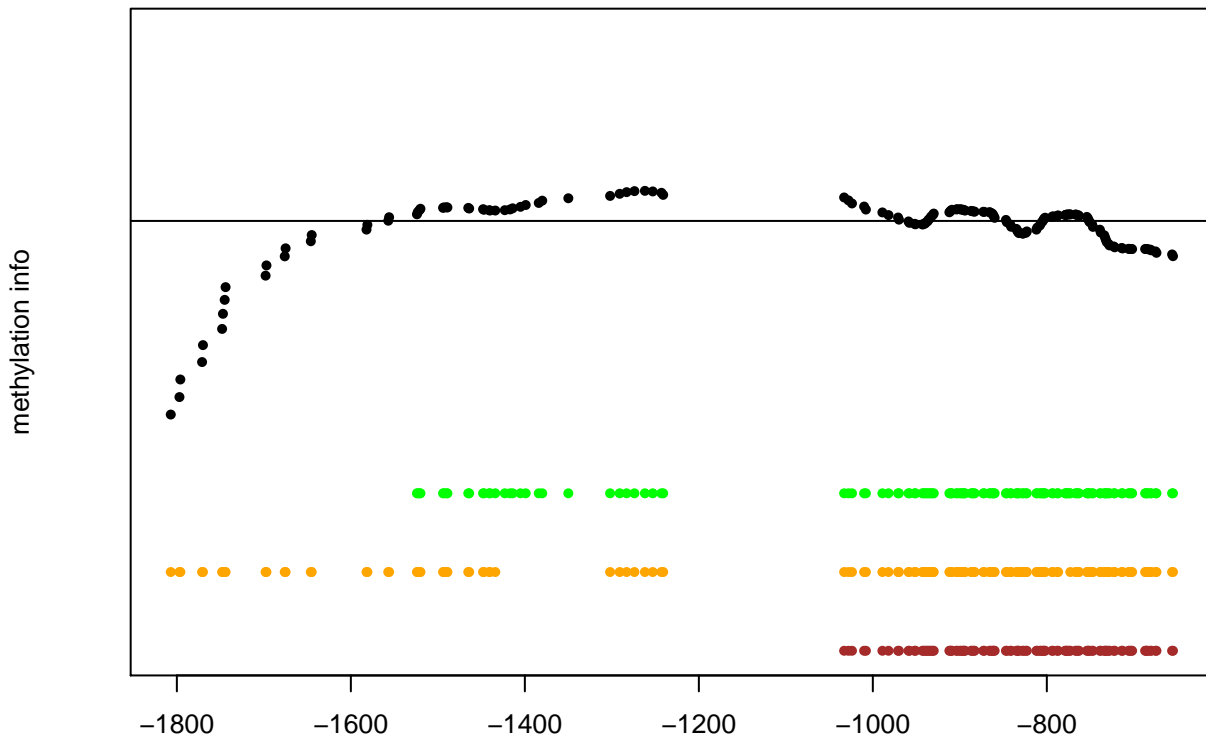

GREM1 raw %methylation, red=UC, blue=Normal

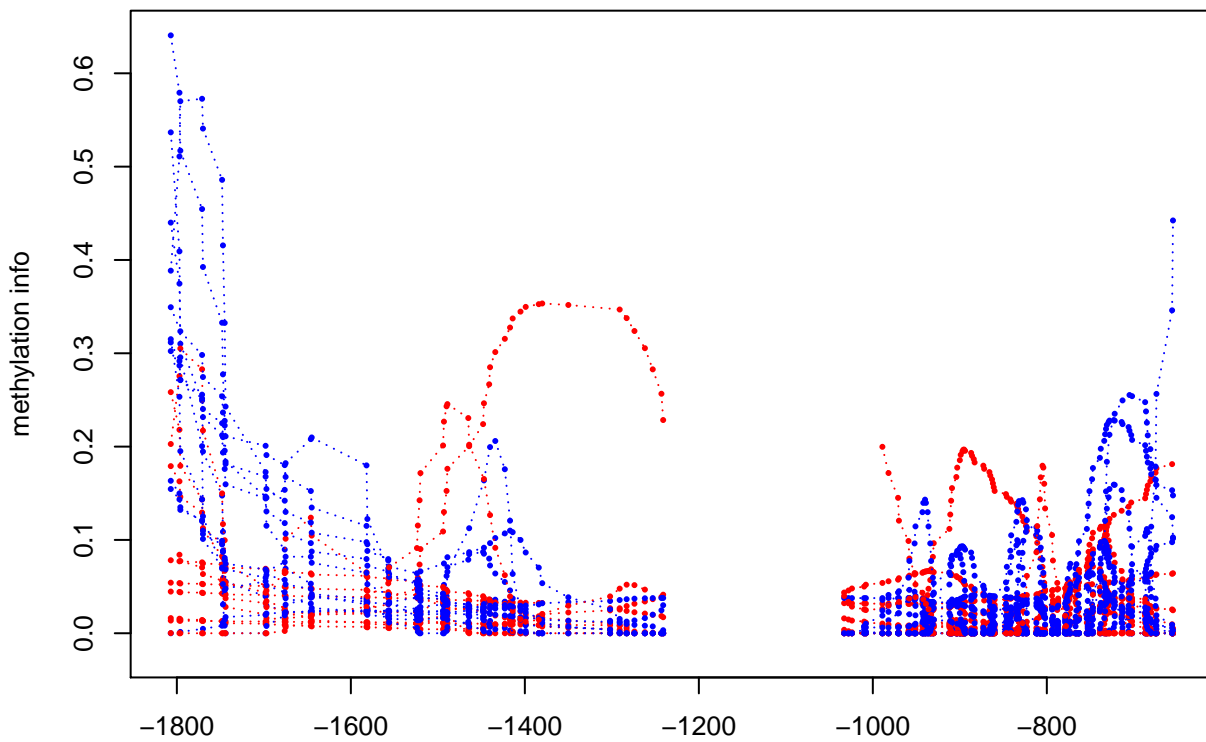

RNAseq logFC(UC-N)= 1.81

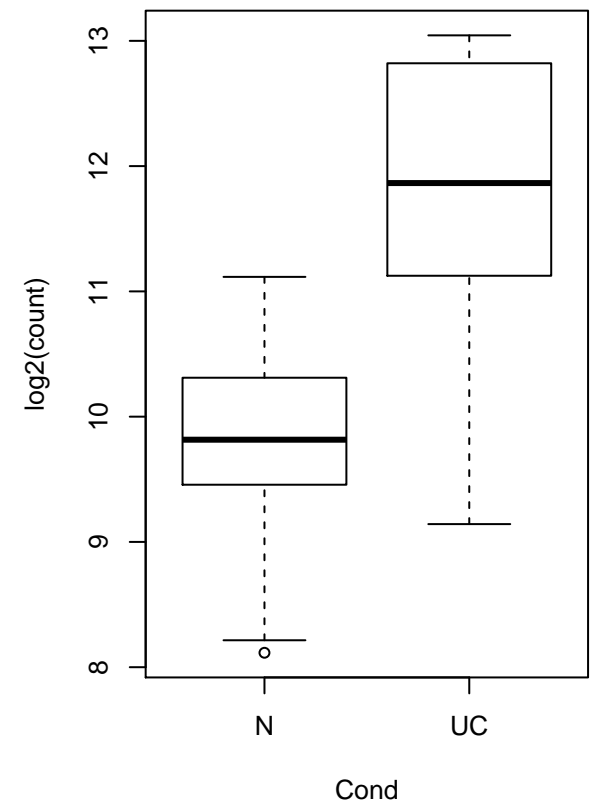

GRHL3 average UC-N %methylation max=6.8% min=-33.27%

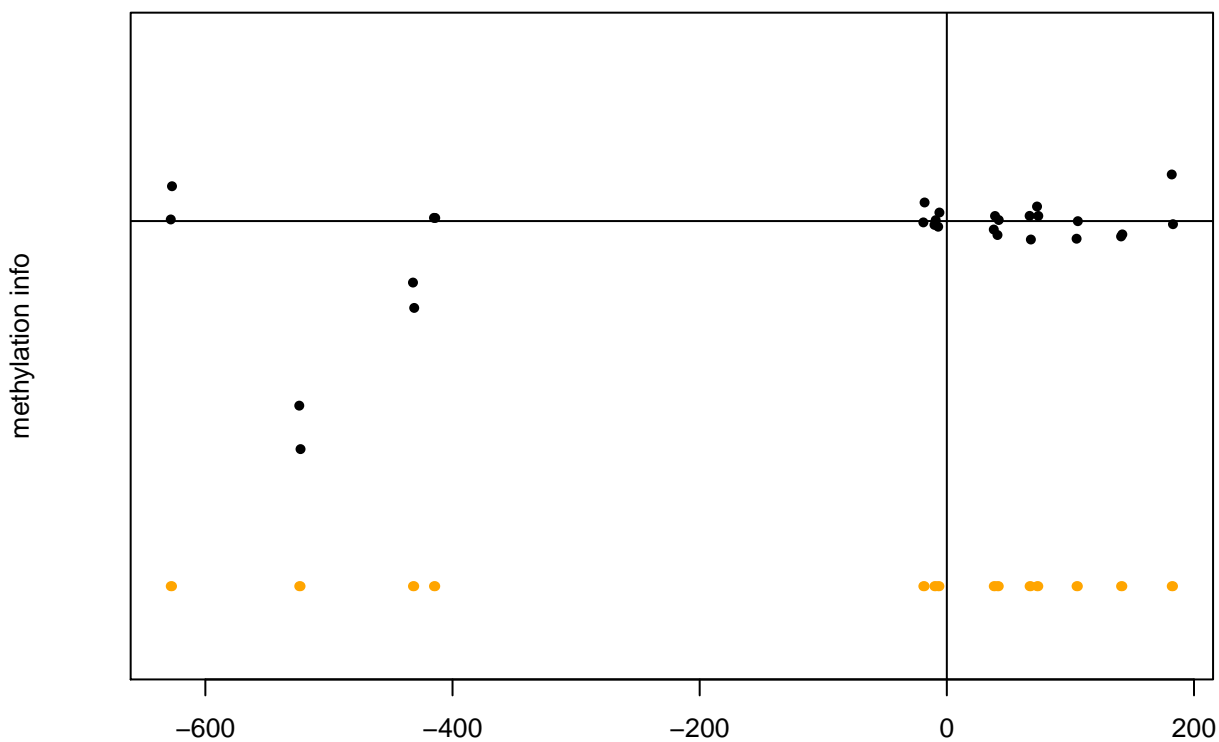

GRHL3 raw %methylation, red=UC, blue=Normal

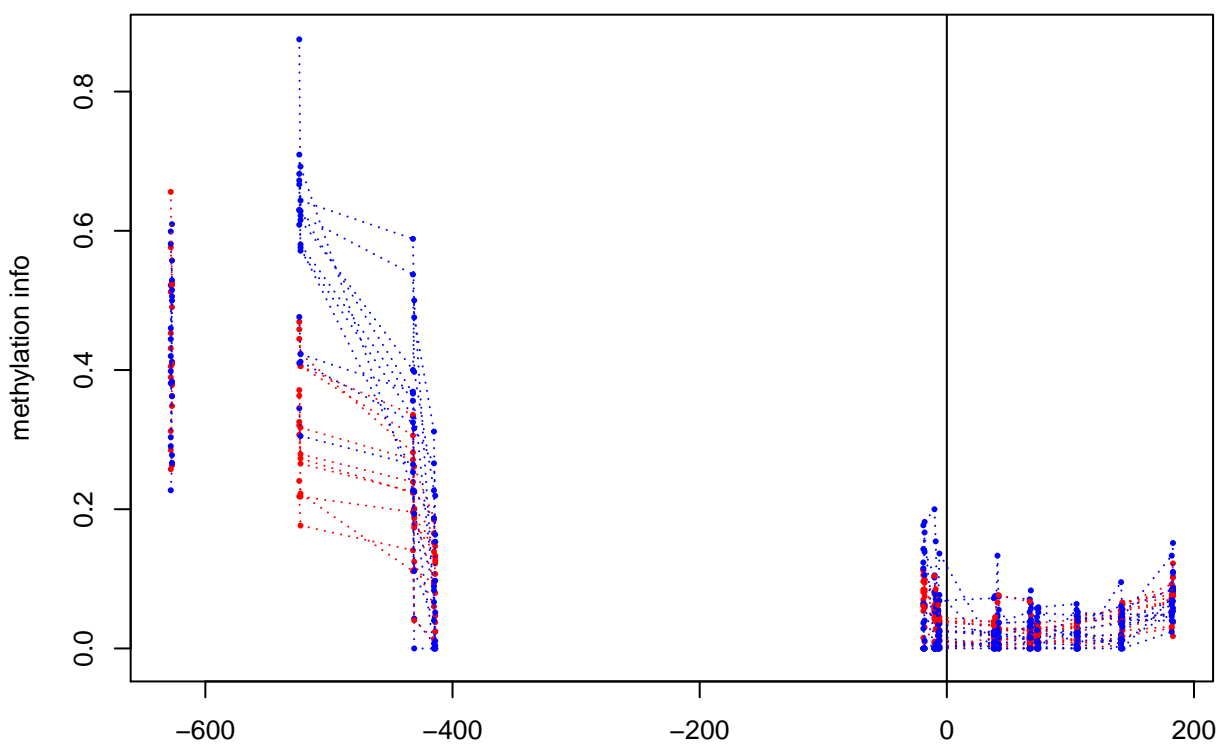

RNAseq logFC(UC-N)= 2.27

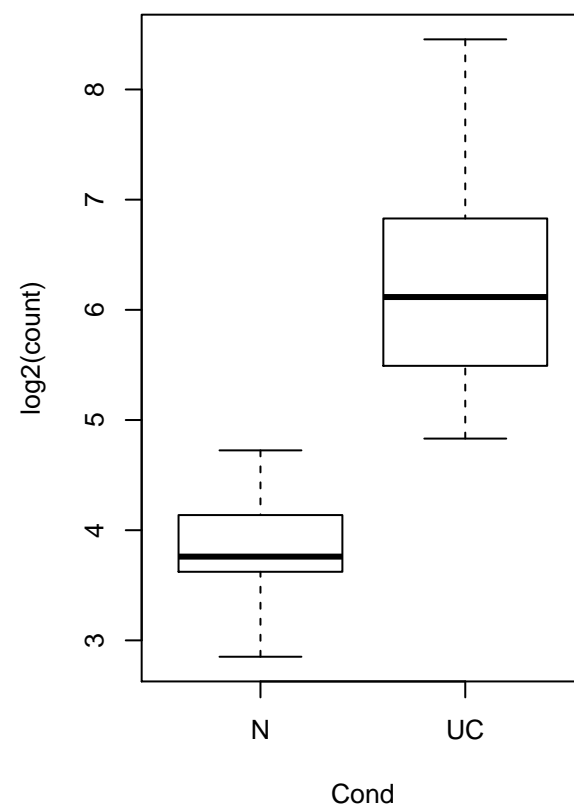

**GSTA1 average UC-N %methylation max=17.9% min=13.13%**

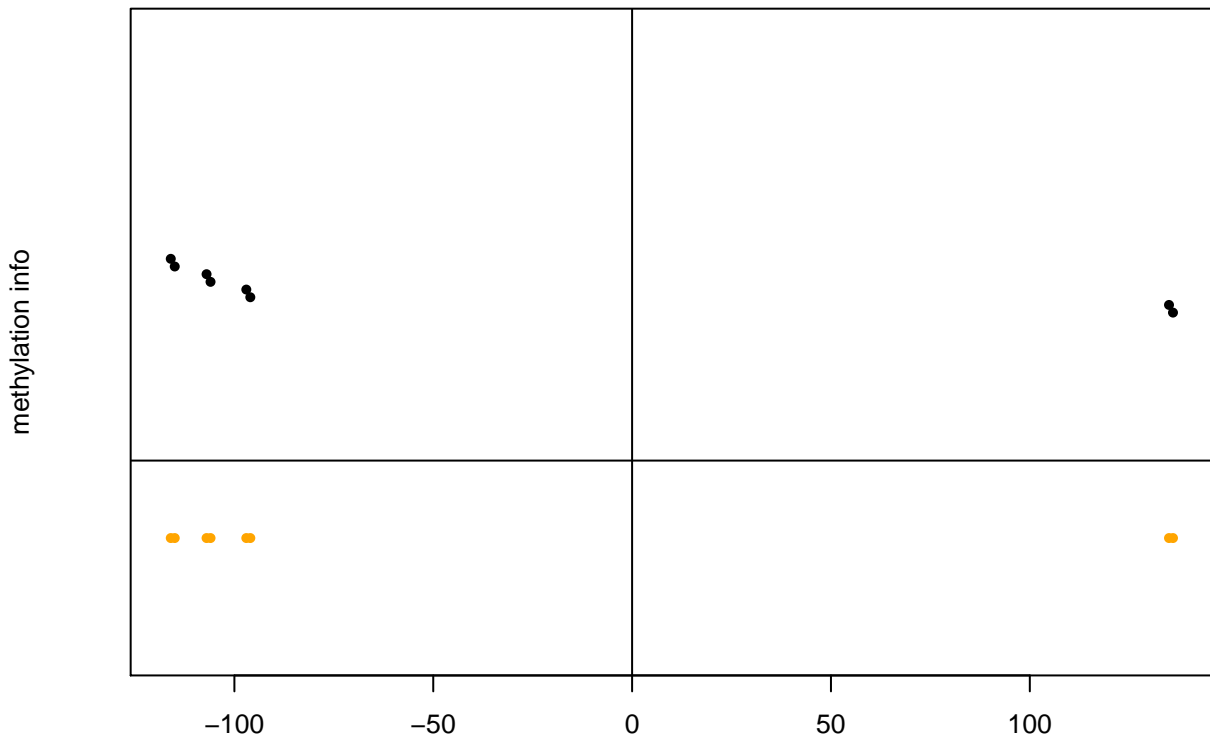

**GSTA1 raw %methylation, red=UC, blue=Normal**

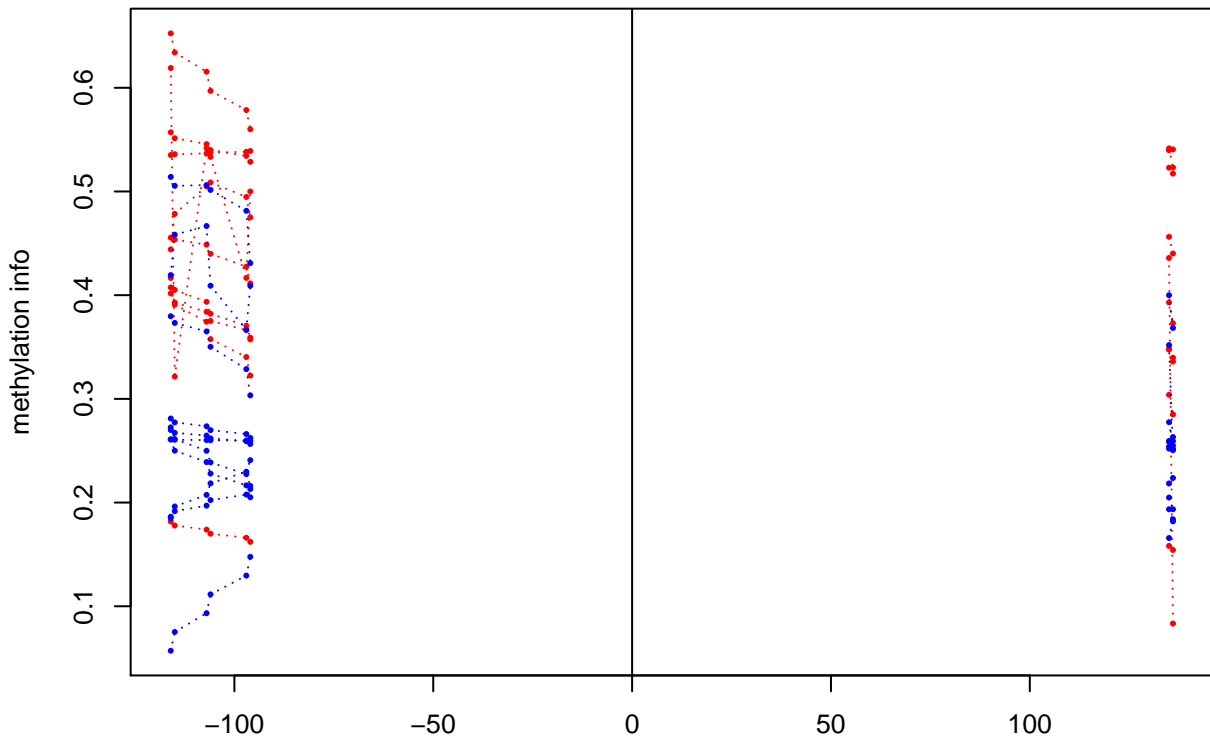

**RNAseq logFC(UC-N)= -1.36**

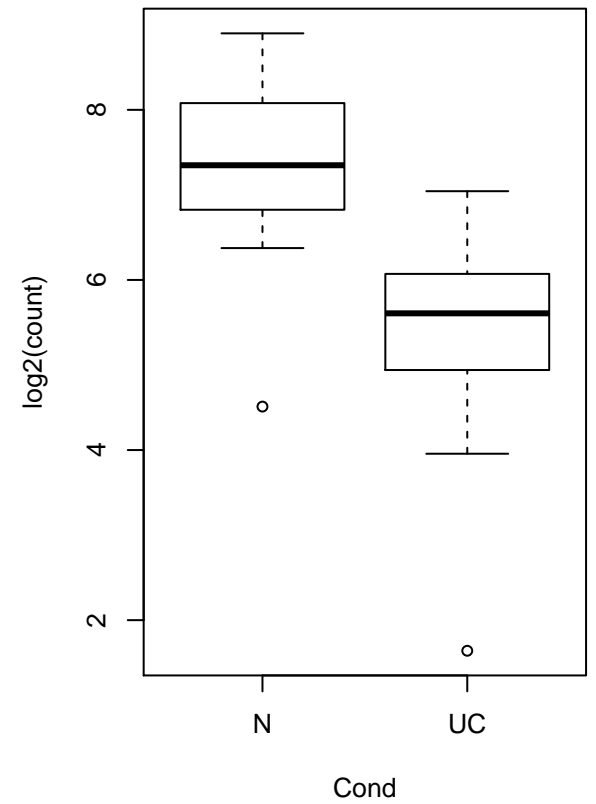

**GUCA2A average UC-N %methylation max=47.26% min=2.4%**

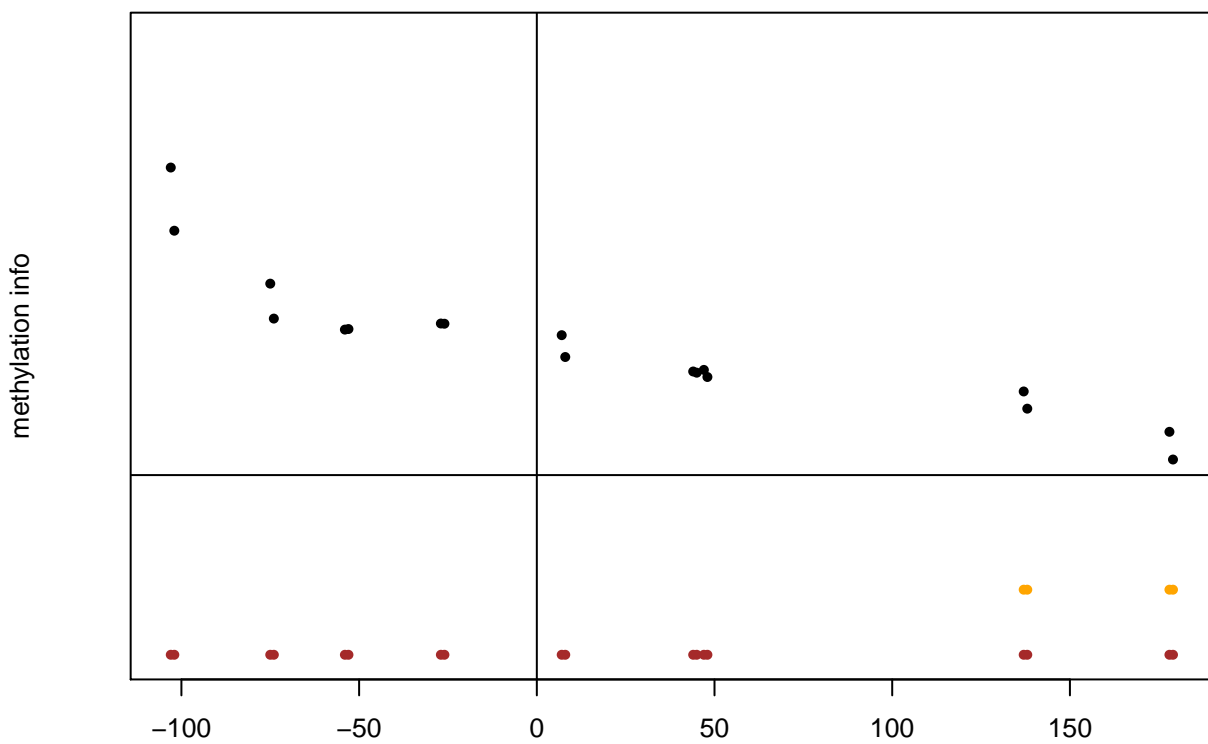

**GUCA2A raw %methylation, red=UC, blue=Normal**

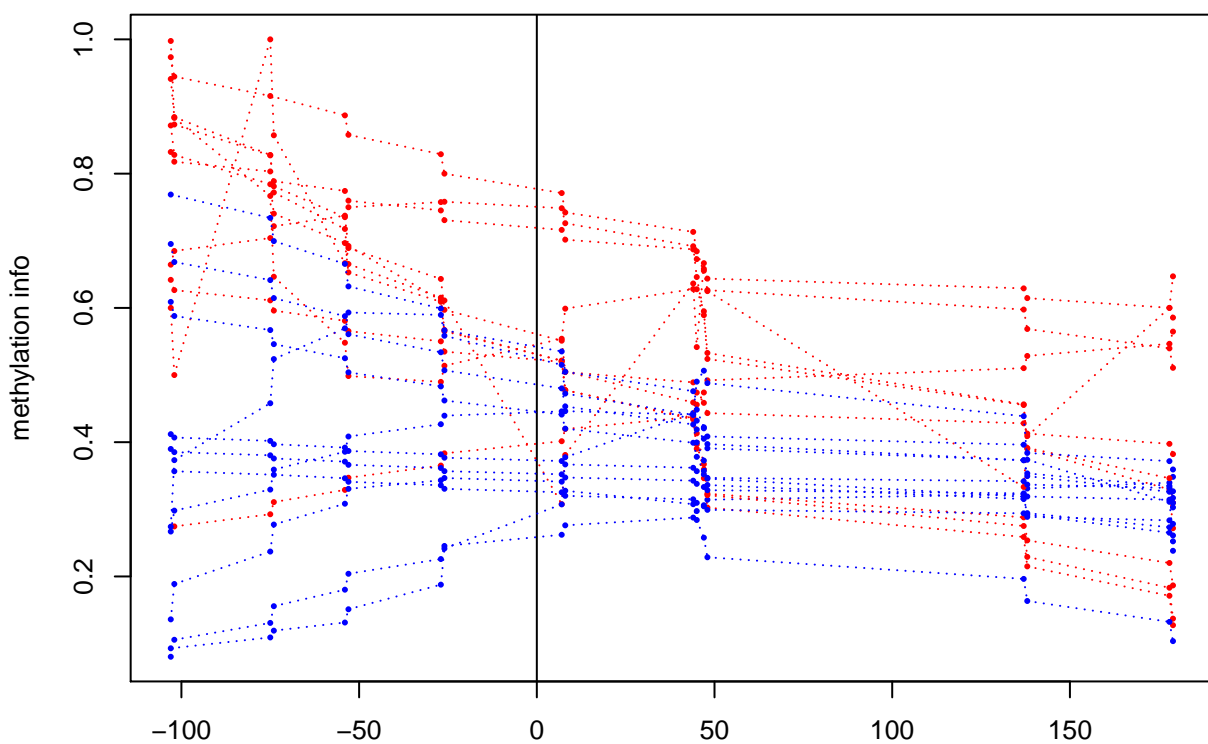

**RNAseq logFC(UC-N)= -2.26**

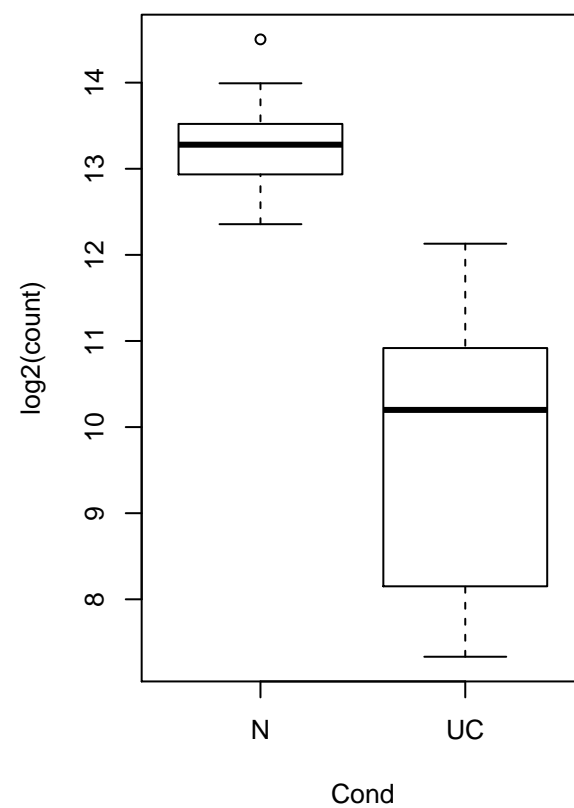

GUCA2B average UC-N %methylation max=20.4% min=-13.72%

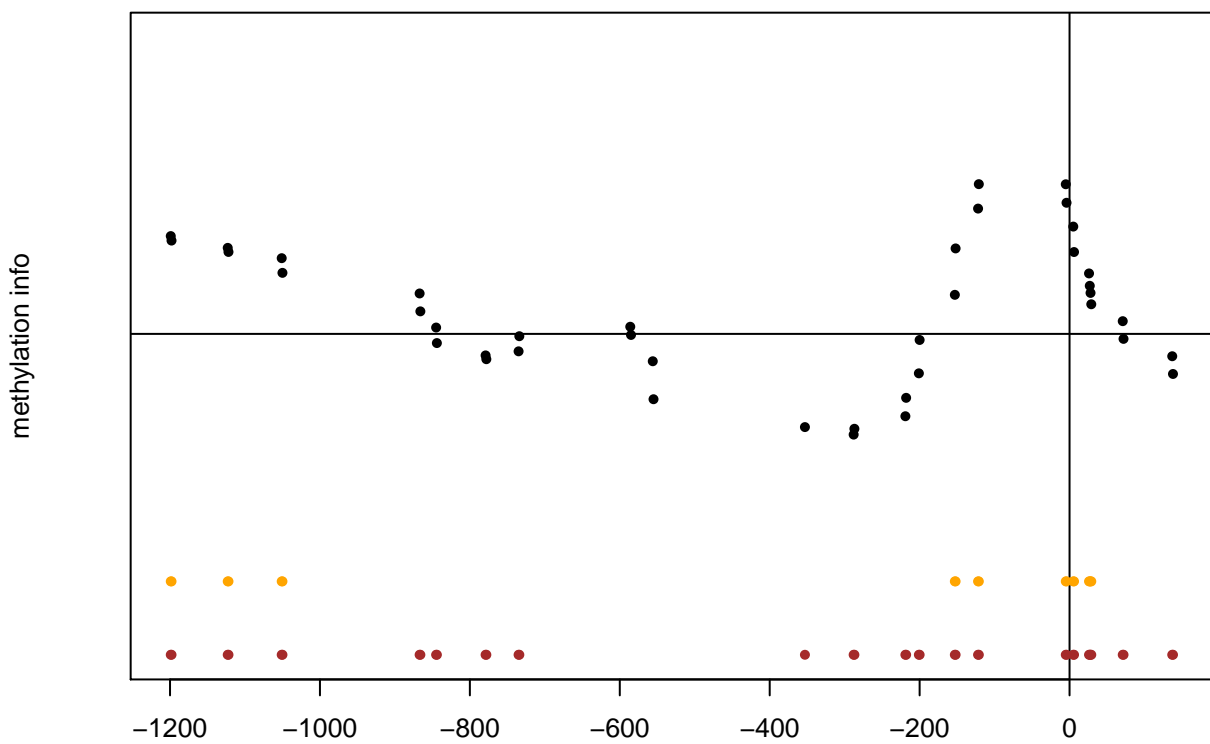

GUCA2B raw %methylation, red=UC, blue=Normal

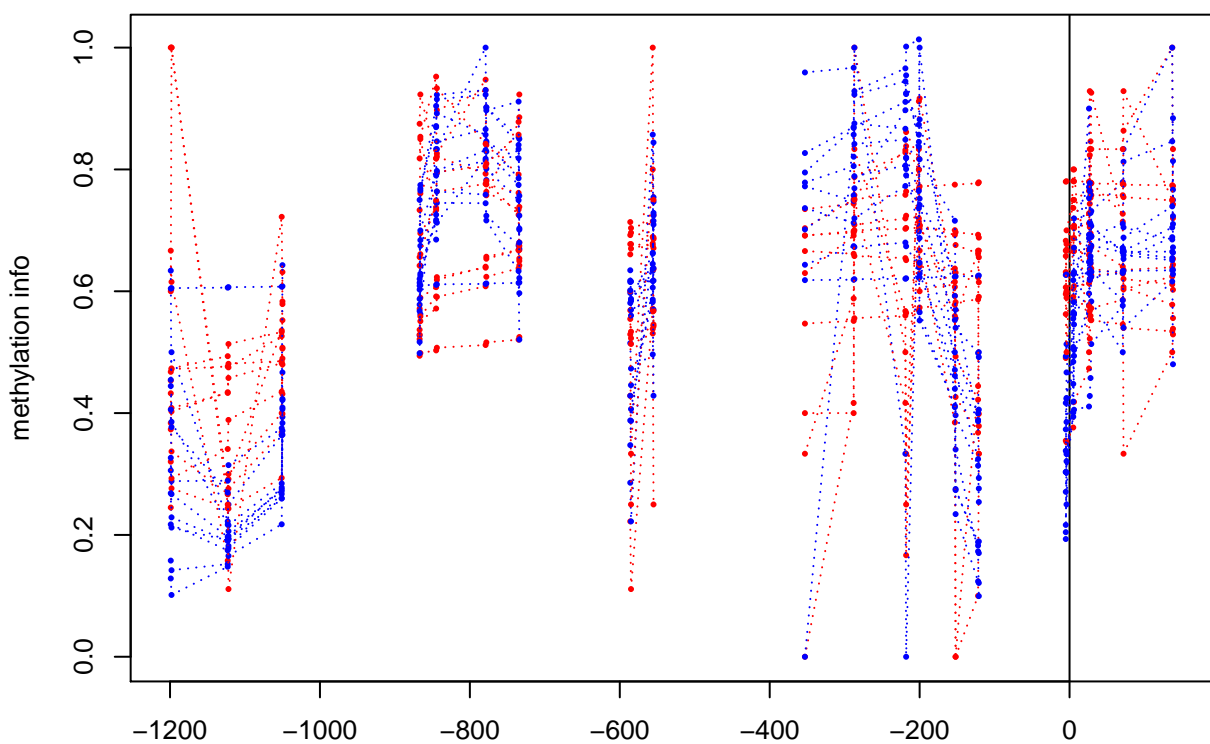

RNAseq logFC(UC-N)= -2.18

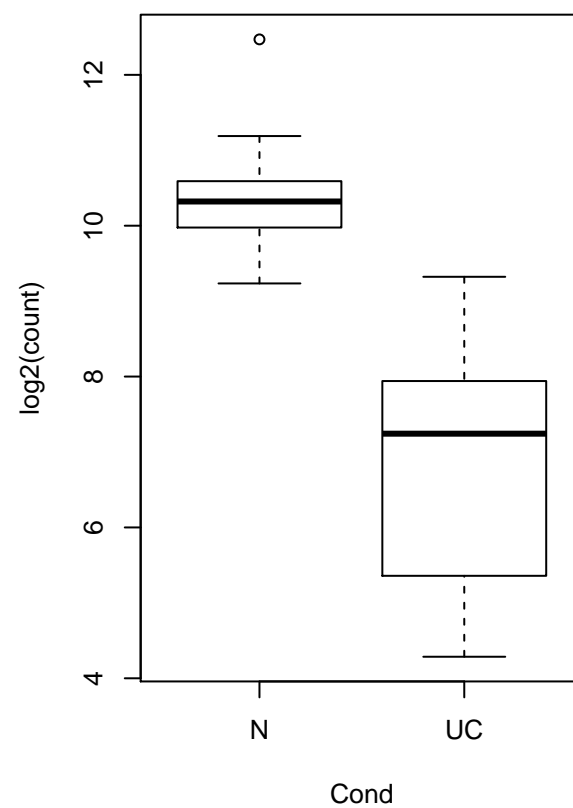

GZMB average UC-N %methylation max=-3.2% min=-33.91%

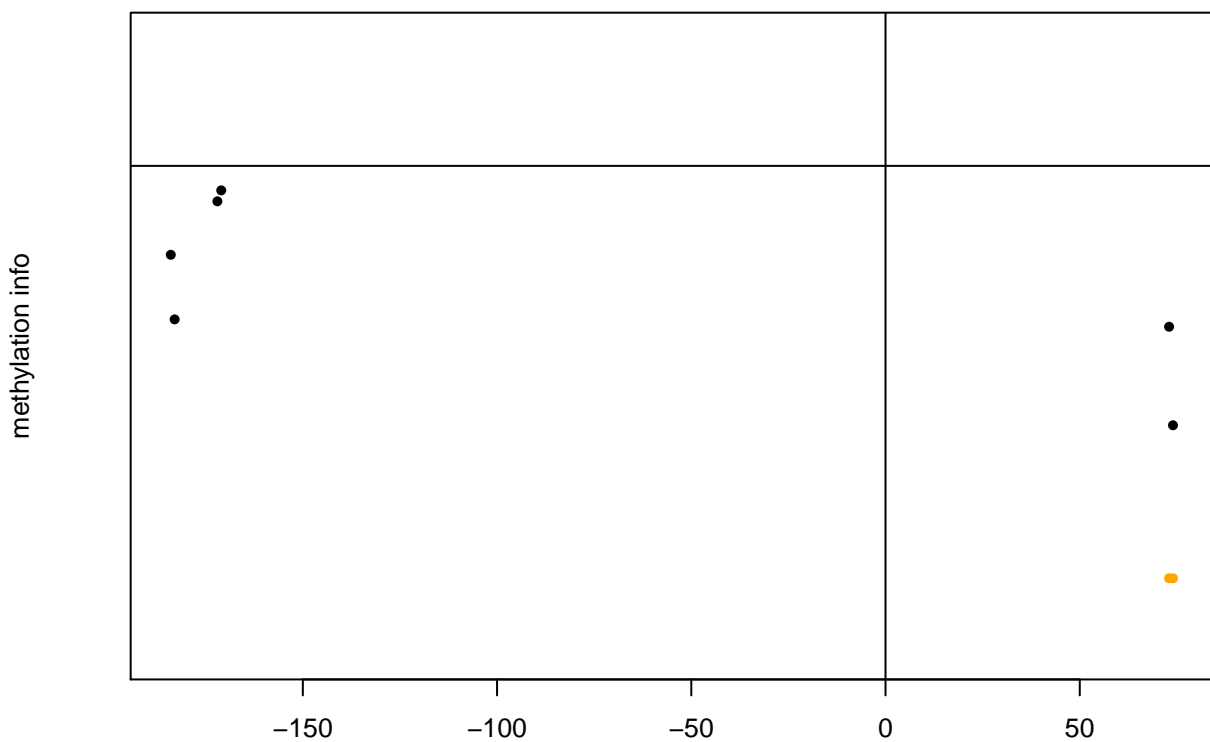

GZMB raw %methylation, red=UC, blue=Normal

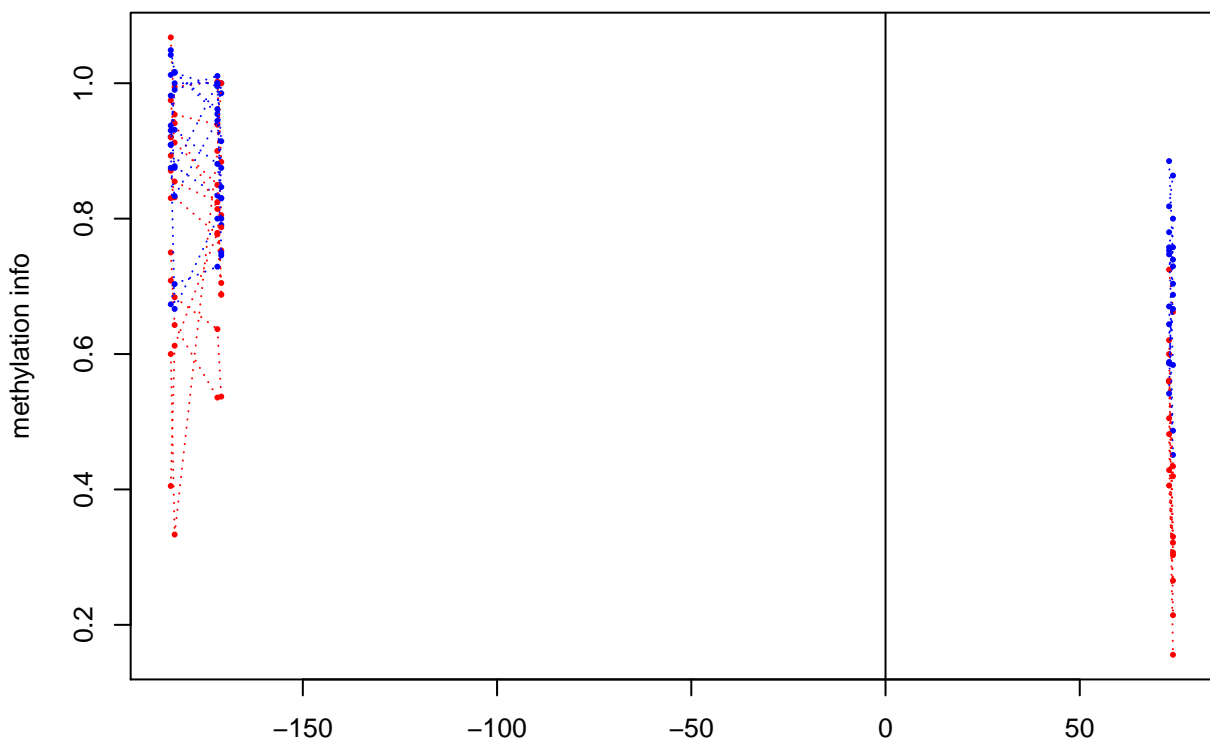

RNAseq logFC(UC-N)= 3.16

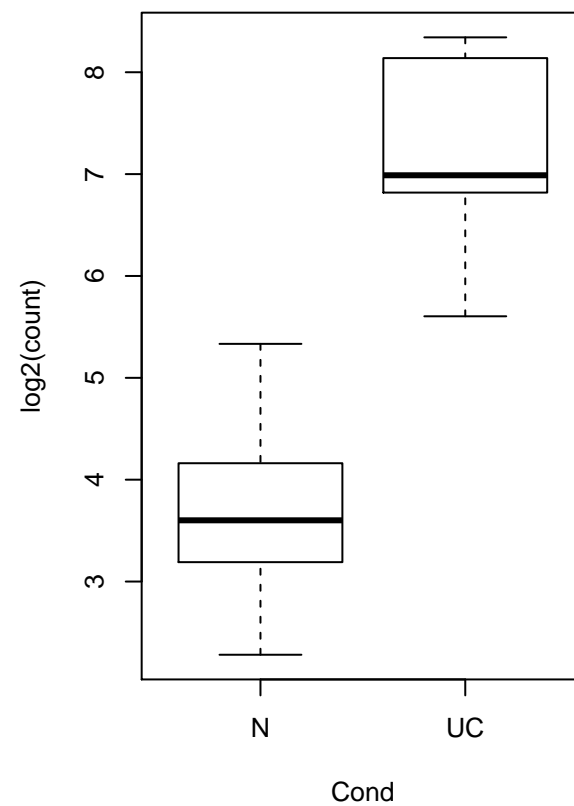

HAVCR1 average UC-N %methylation max=14.45% min=9.17%

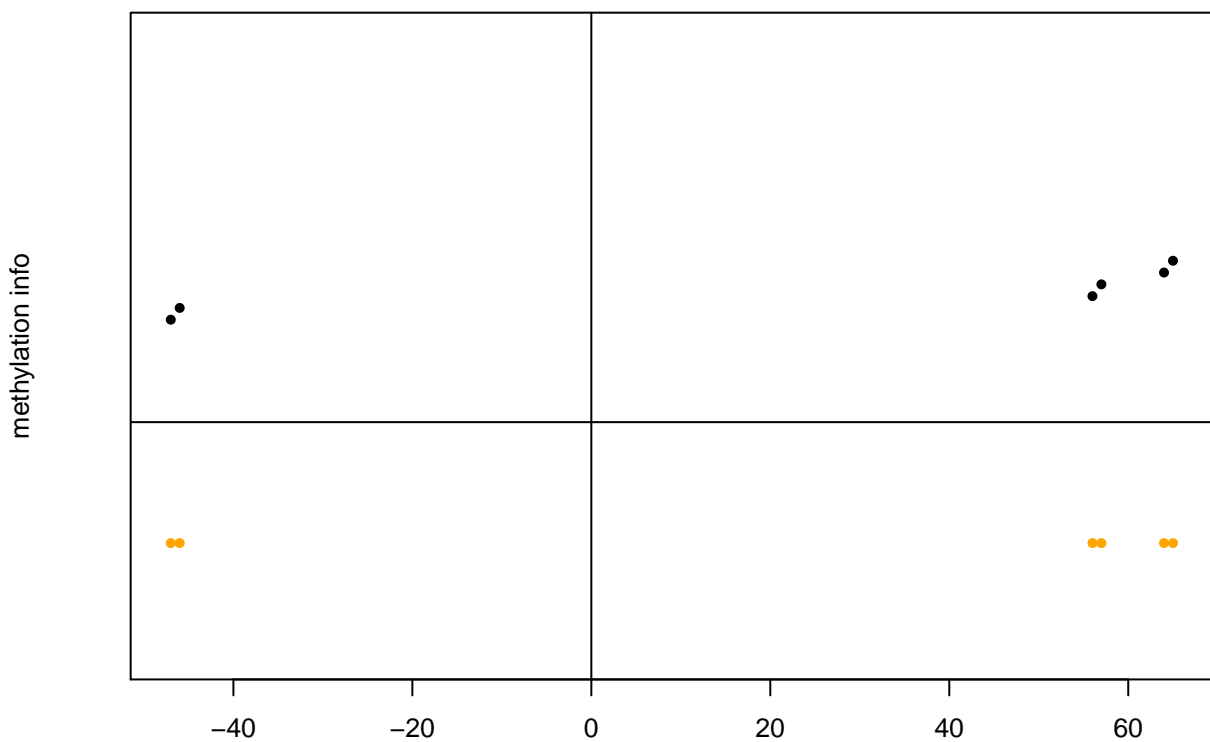

HAVCR1 raw %methylation, red=UC, blue=Normal

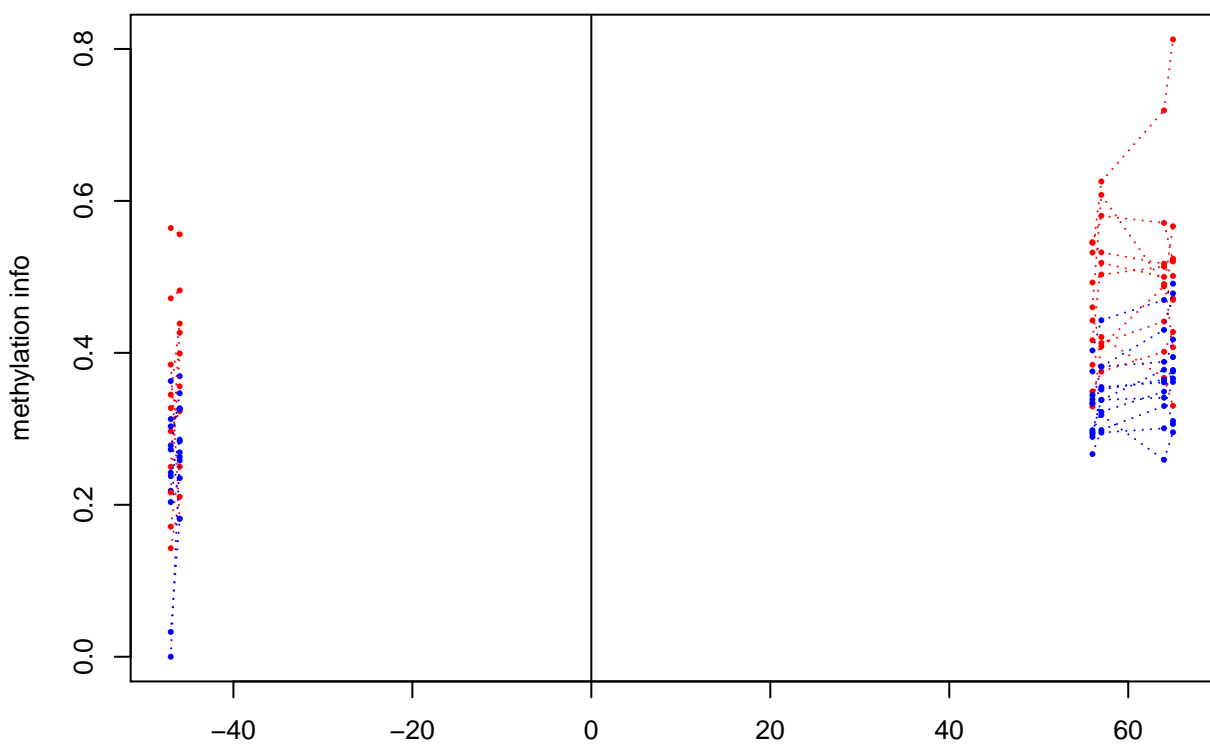

RNAseq logFC(UC-N) = -2.28

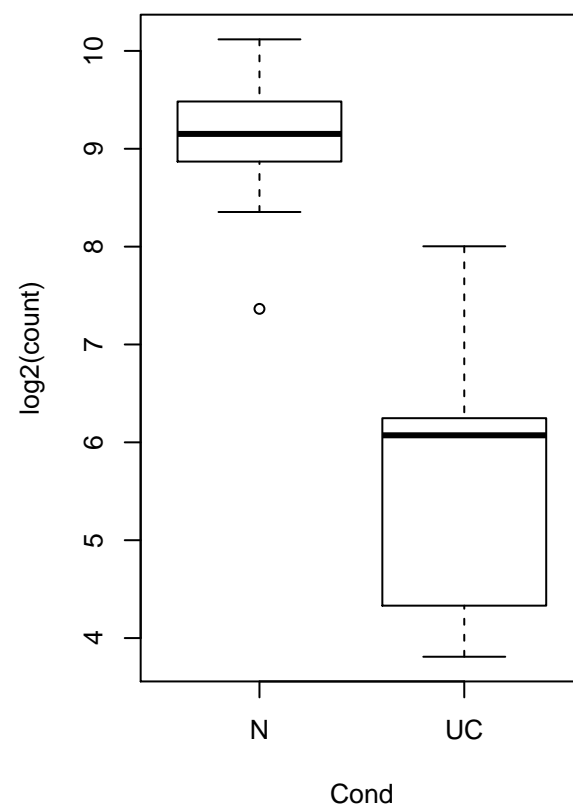



HCAR2 average UC-N %methylation max=-6.35% min=-19.88%

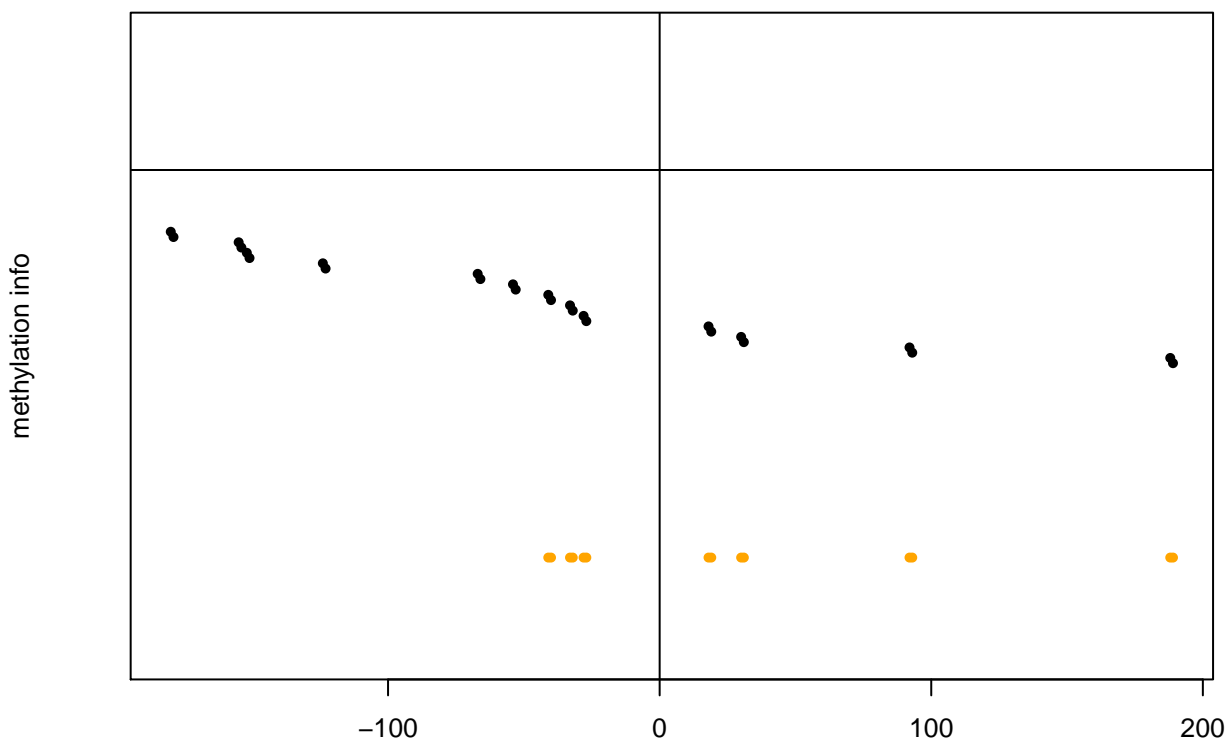

HCAR2 raw %methylation, red=UC, blue=Normal

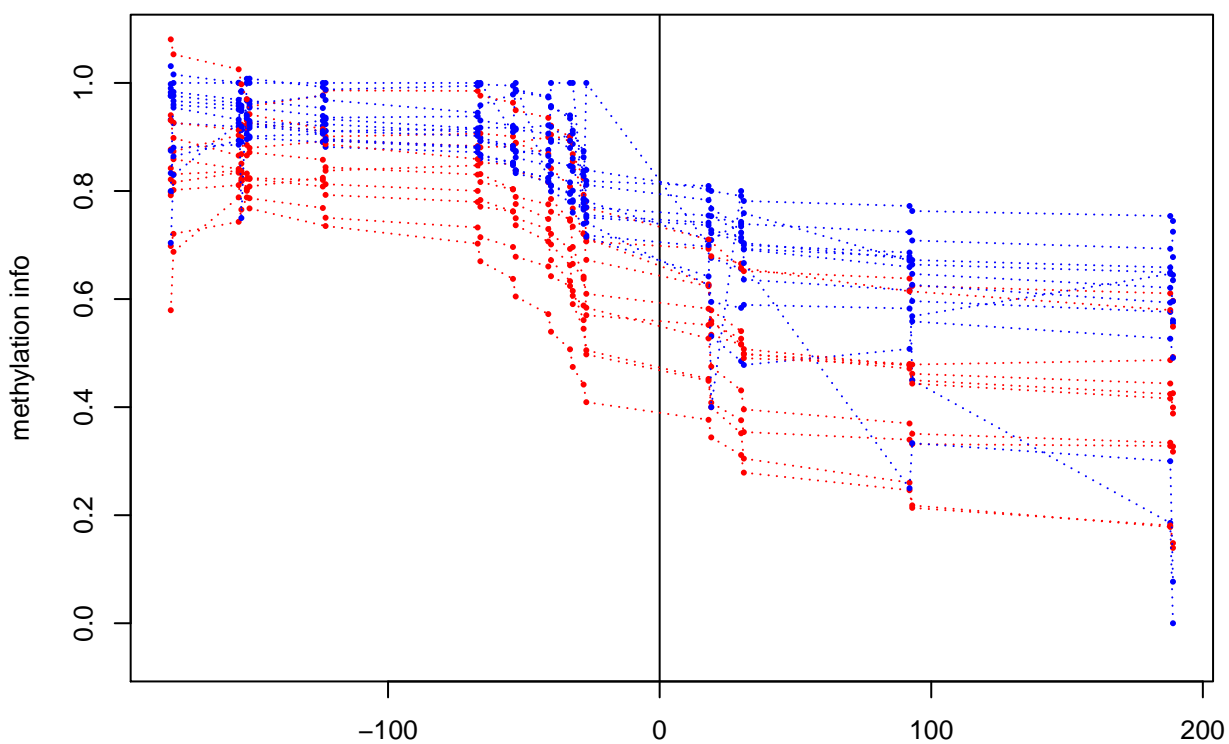

RNAseq logFC(UC-N)= 3.58

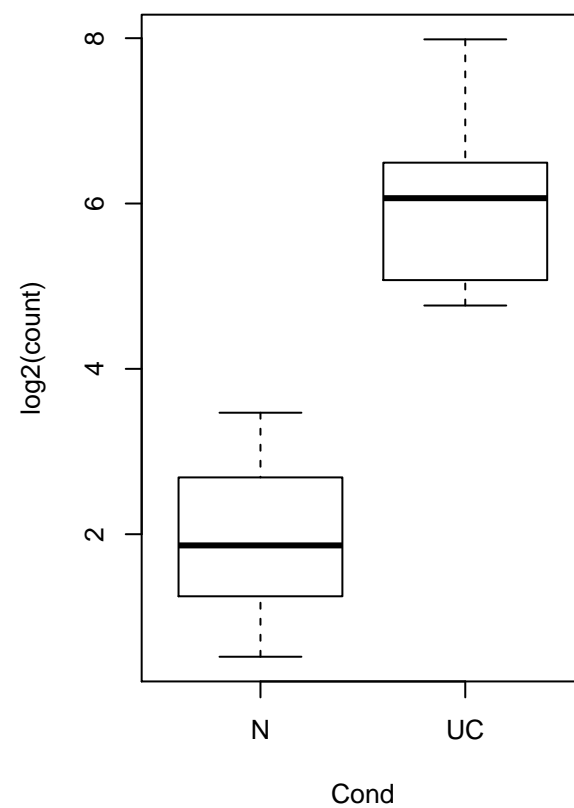

HCAR3 average UC-N %methylation max=-15% min=-24.39%

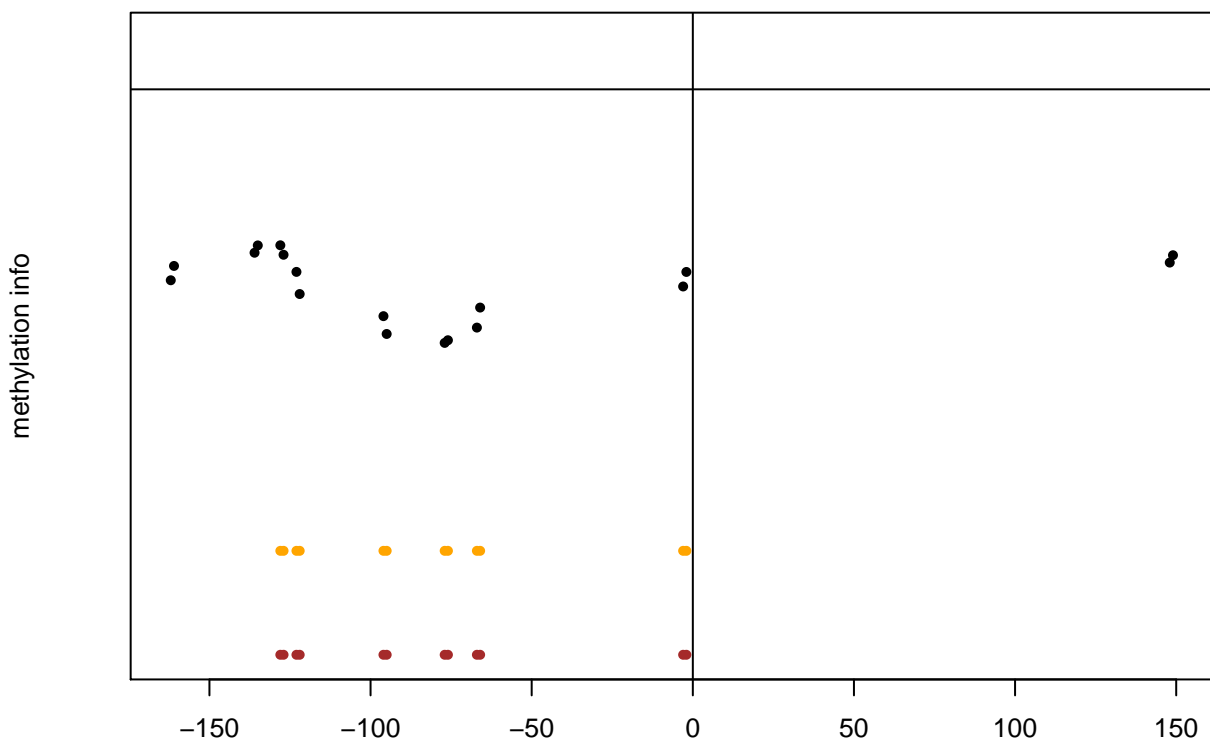

HCAR3 raw %methylation, red=UC, blue=Normal

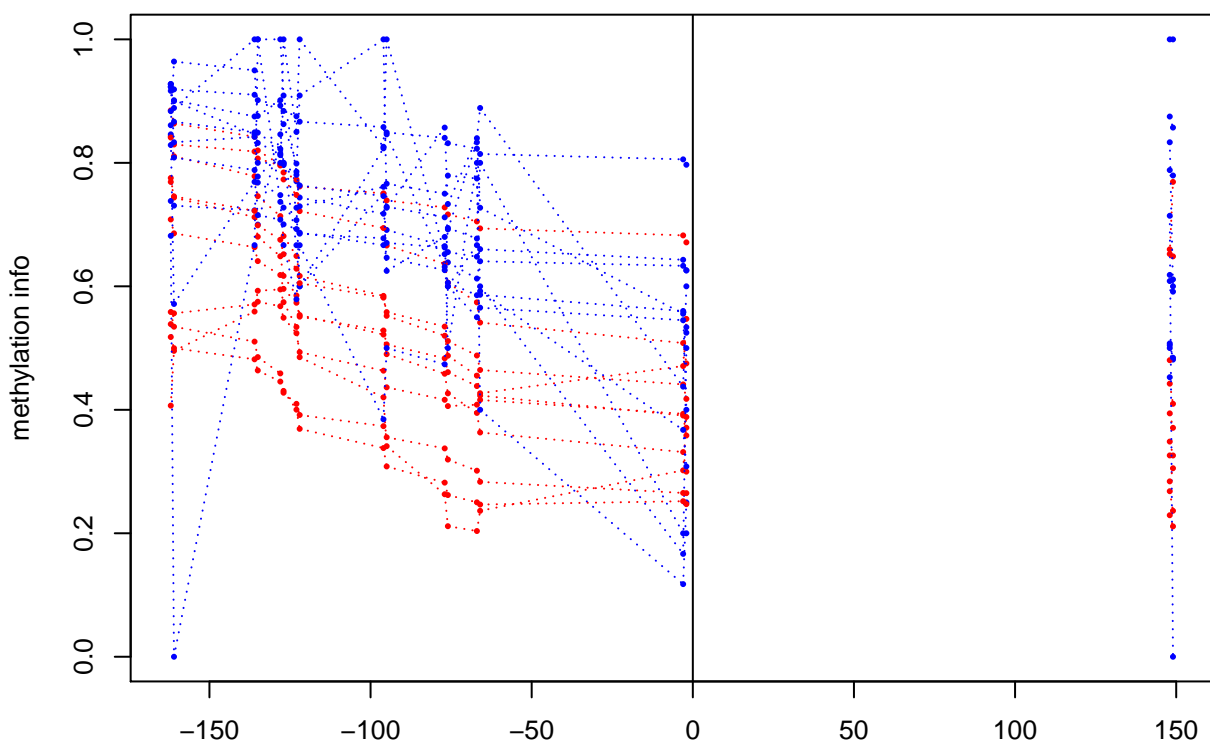

RNAseq logFC(UC-N)= 4.32

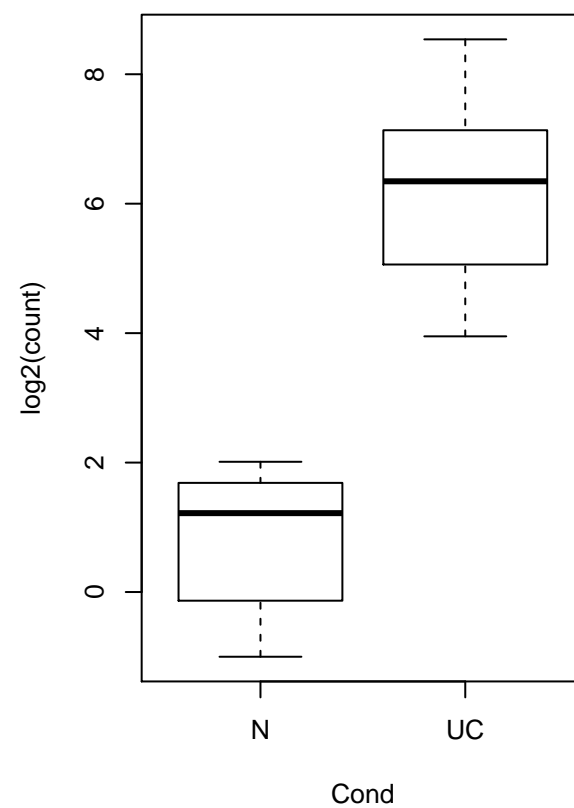

HCLS1 average UC-N %methylation max=-31.6% min=-35.89%

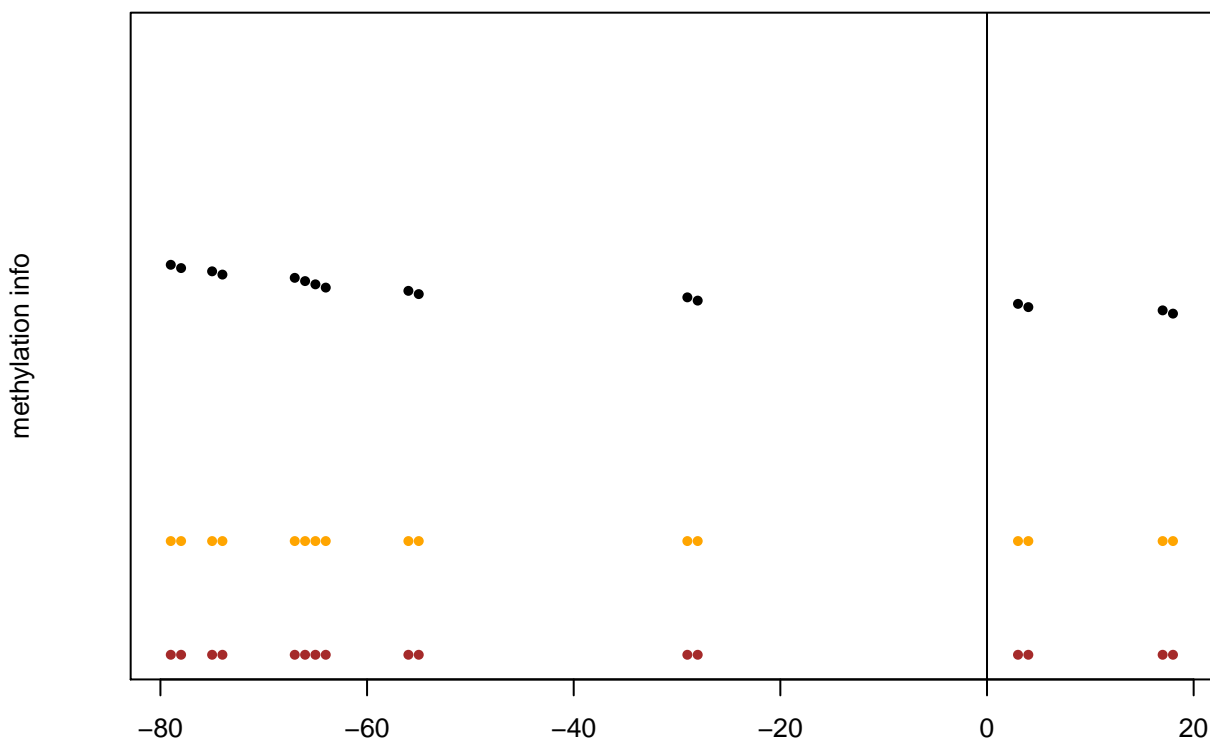

HCLS1 raw %methylation, red=UC, blue=Normal

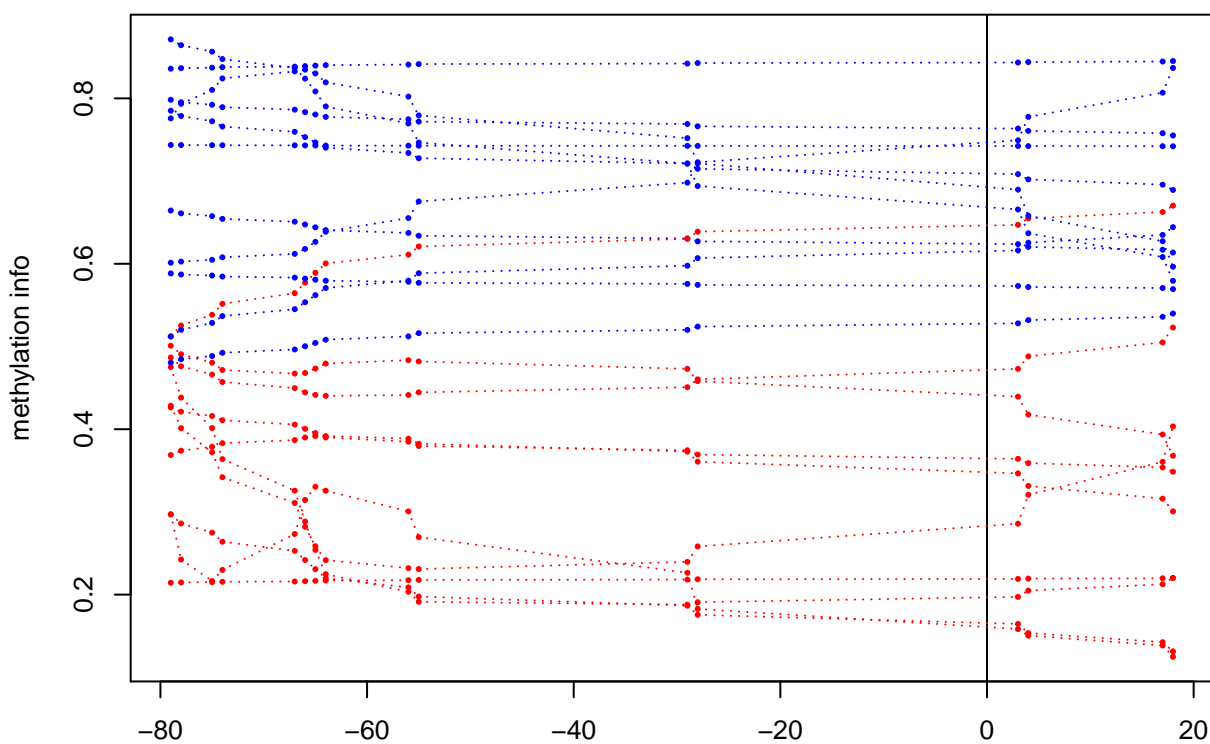

RNAseq logFC(UC-N)= 1.1

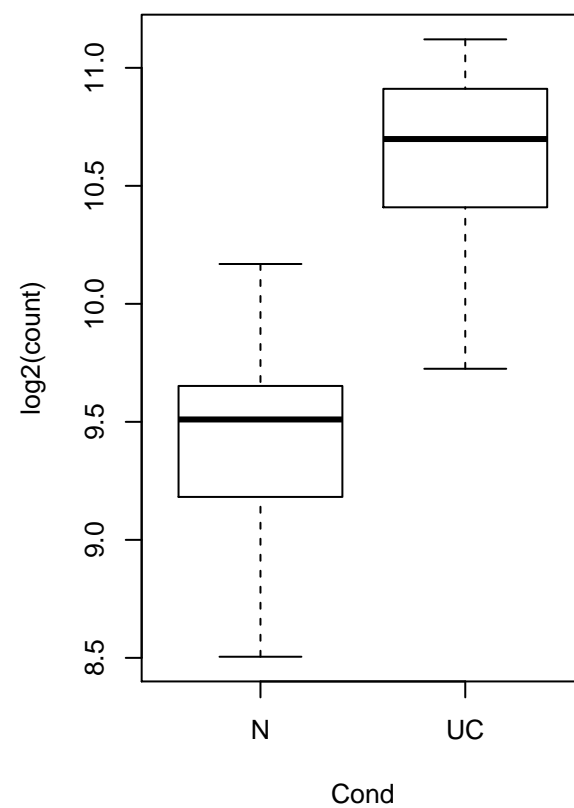

HGF average UC-N %methylation max=-3.68% min=-20.05%

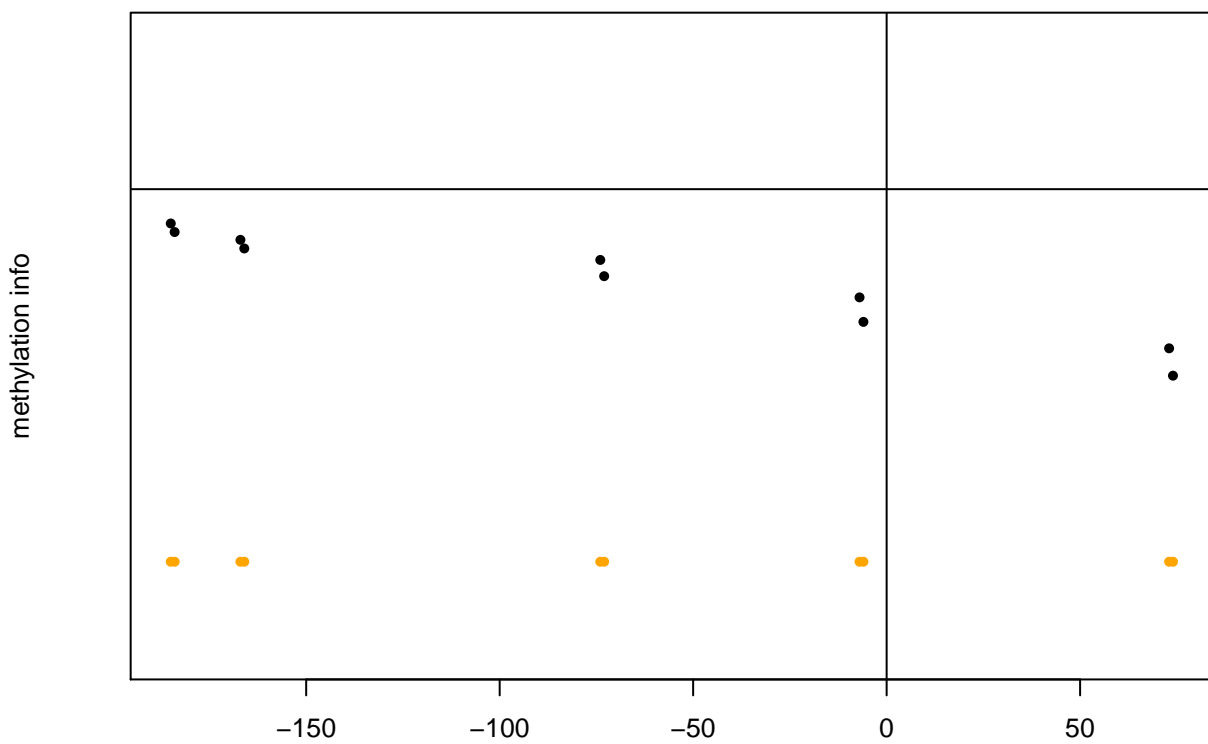

HGF raw %methylation, red=UC, blue=Normal

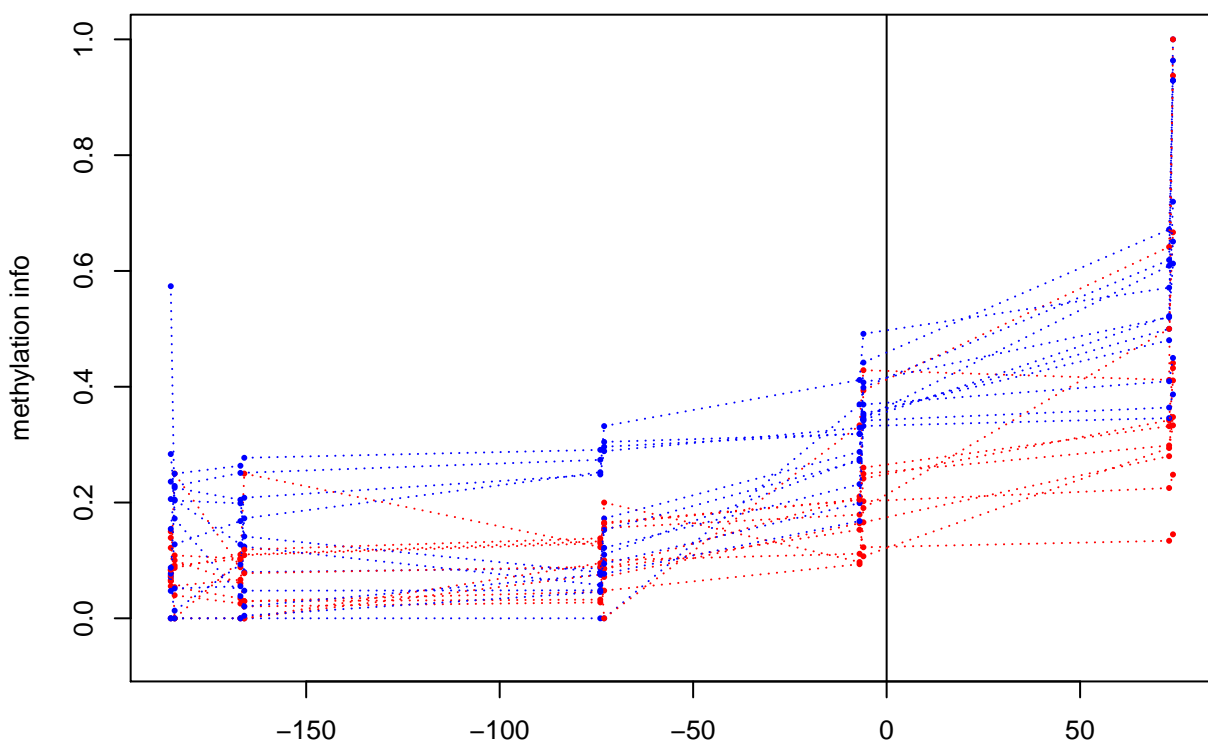

RNAseq logFC(UC-N)= 1.12

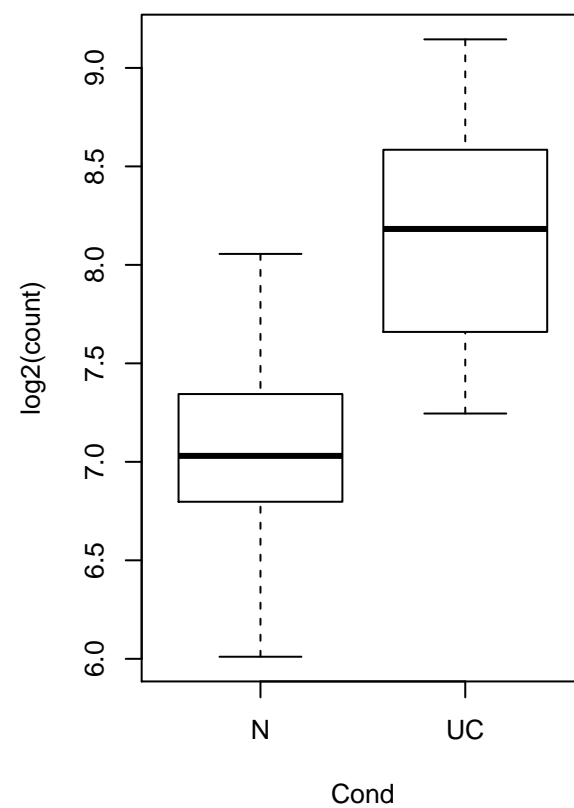

HHEX average UC-N %methylation max=0.83% min=-18.09%

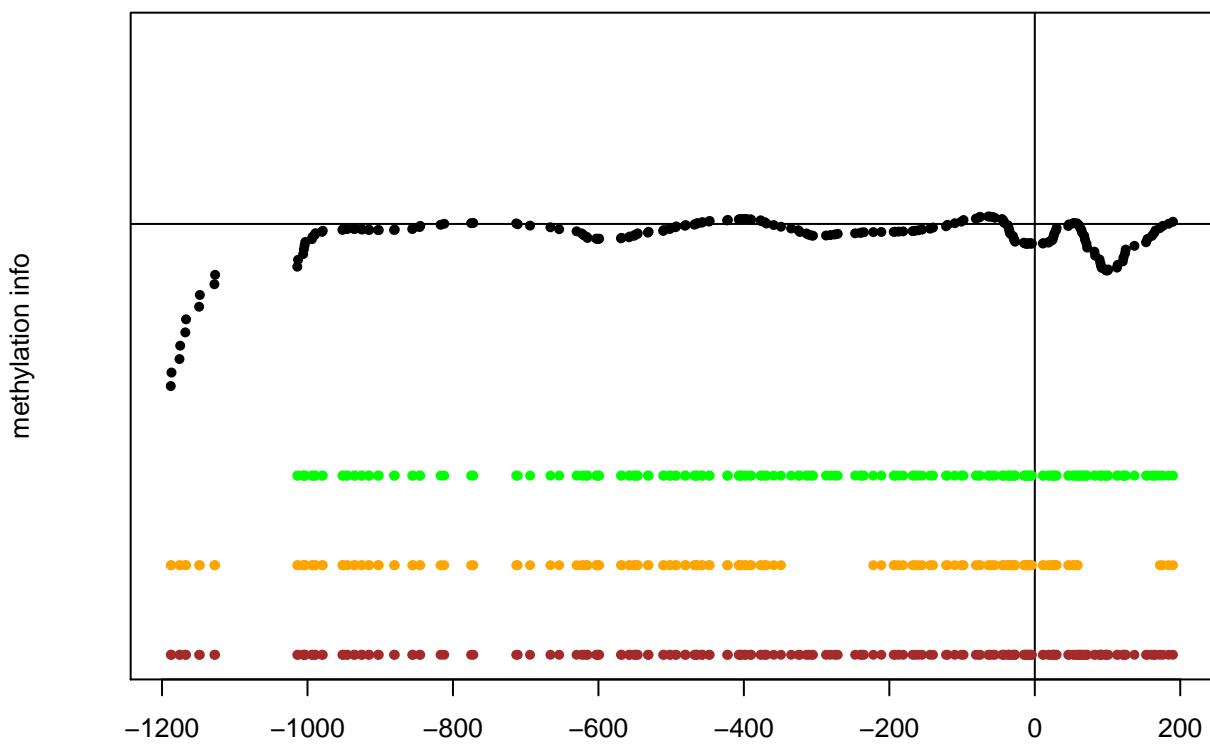

HHEX raw %methylation, red=UC, blue=Normal

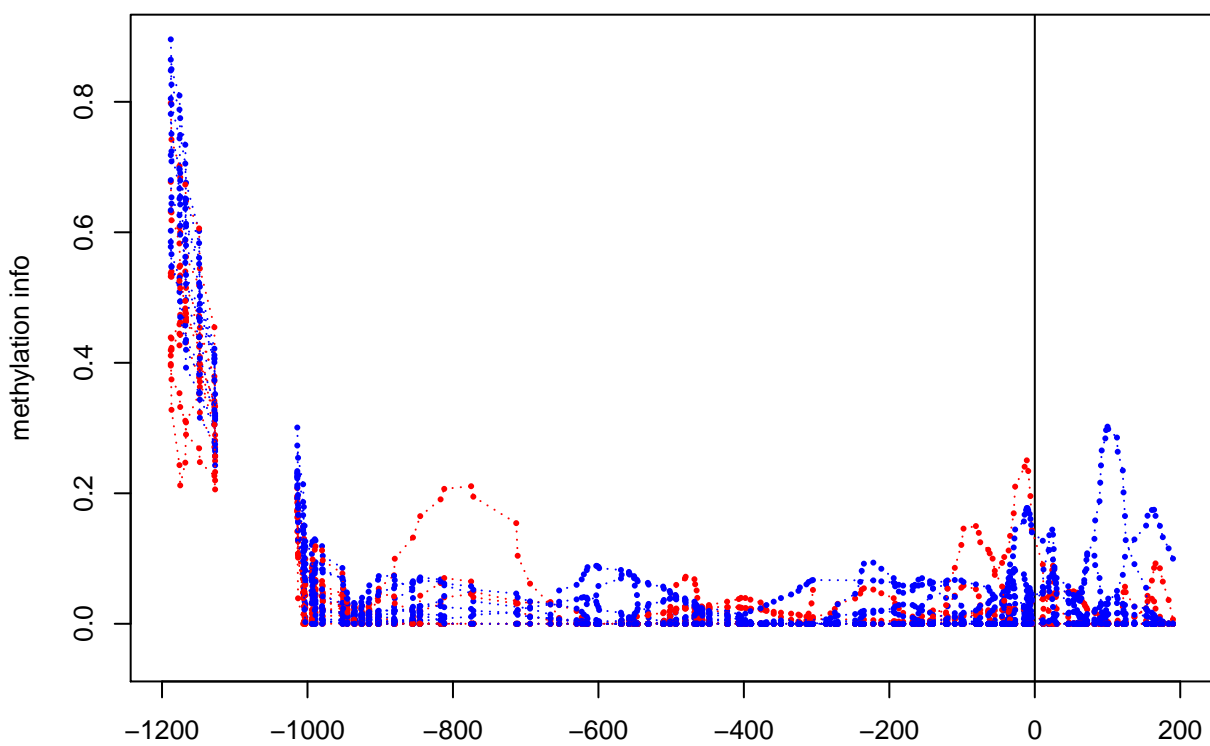

RNAseq logFC(UC-N)= 1.05

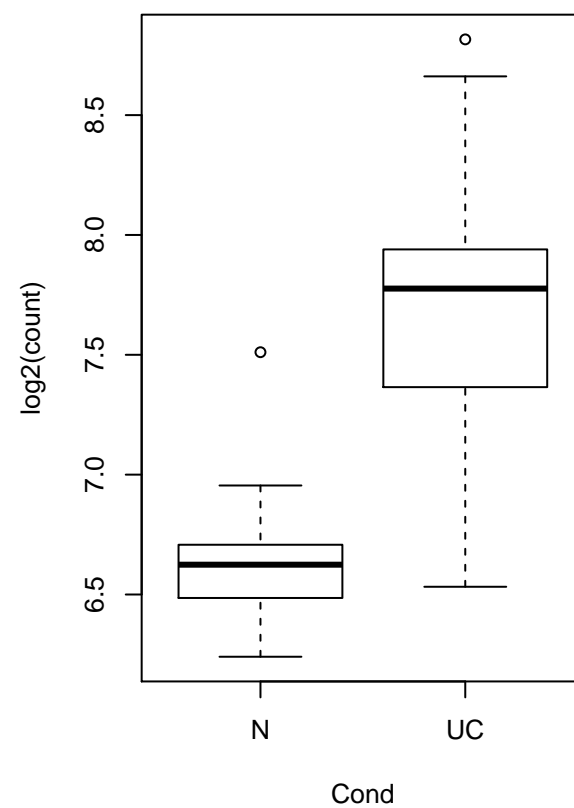

HIST3H2BB average UC-N %methylation max=0.19% min=-4.74%

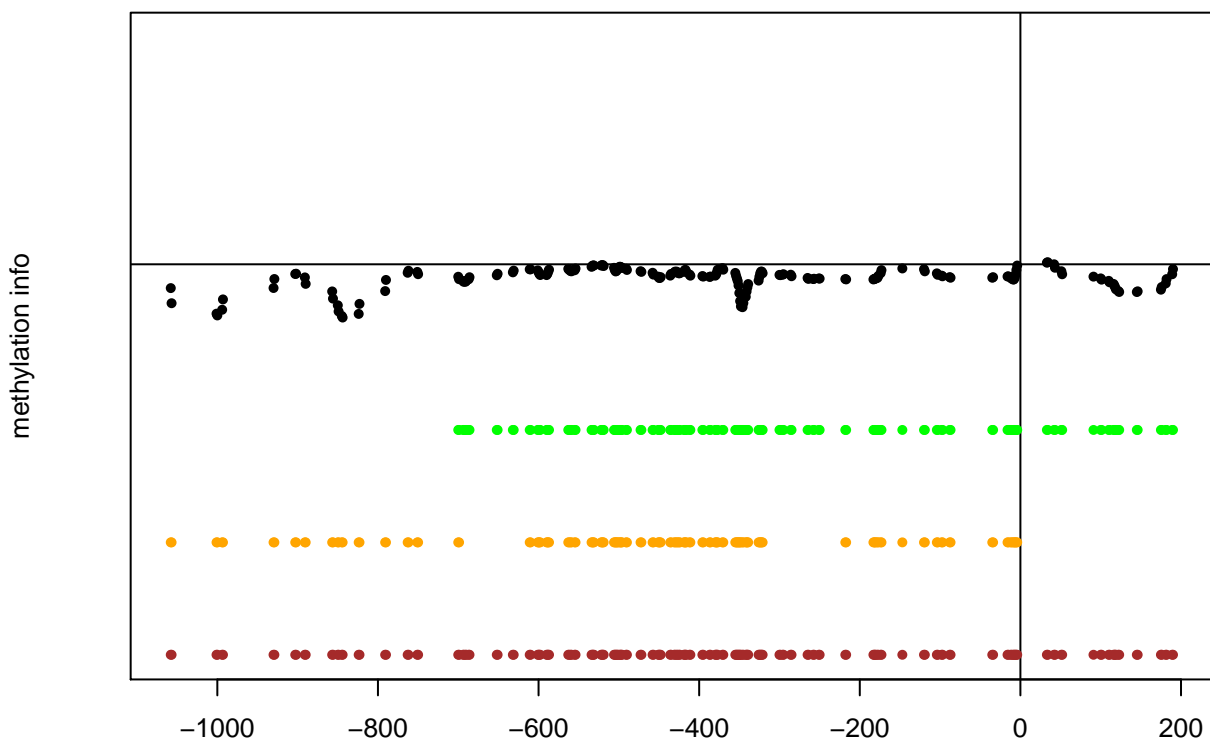

HIST3H2BB raw %methylation, red=UC, blue=Normal

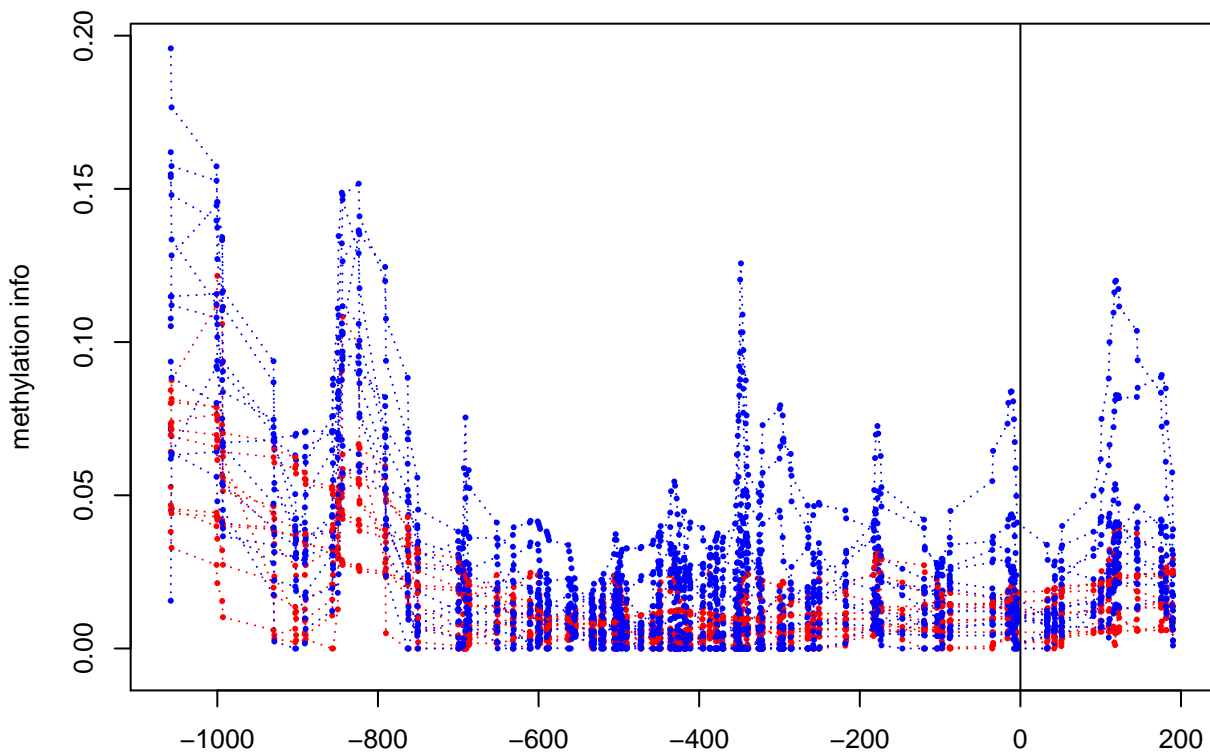

RNAseq logFC(UC-N)= 1.17

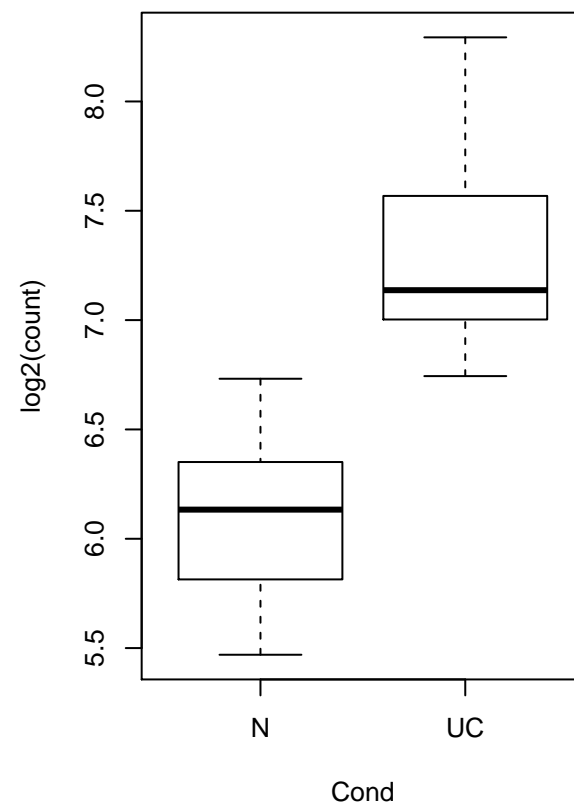

HK2 average UC-N %methylation max=3.79% min=-21.5%

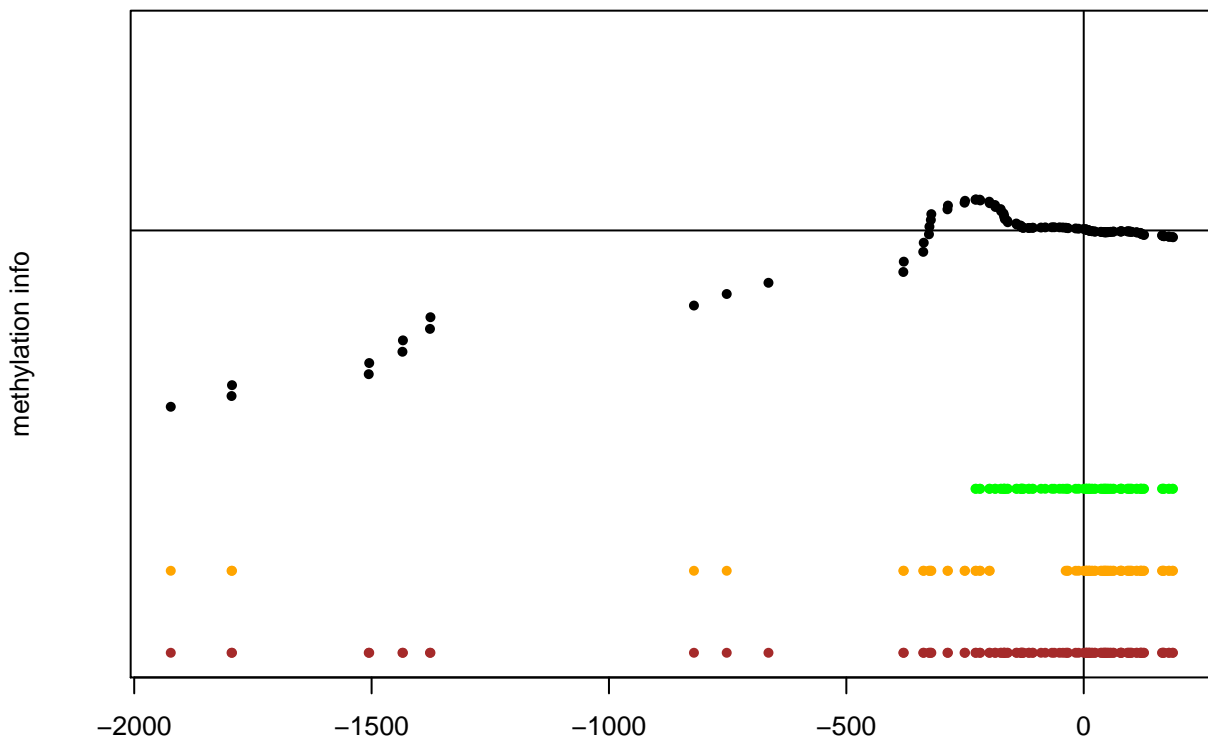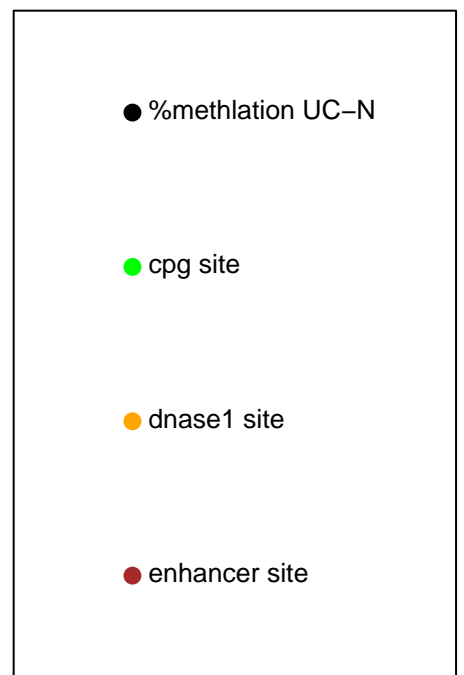

HK2 raw %methylation, red=UC, blue=Normal

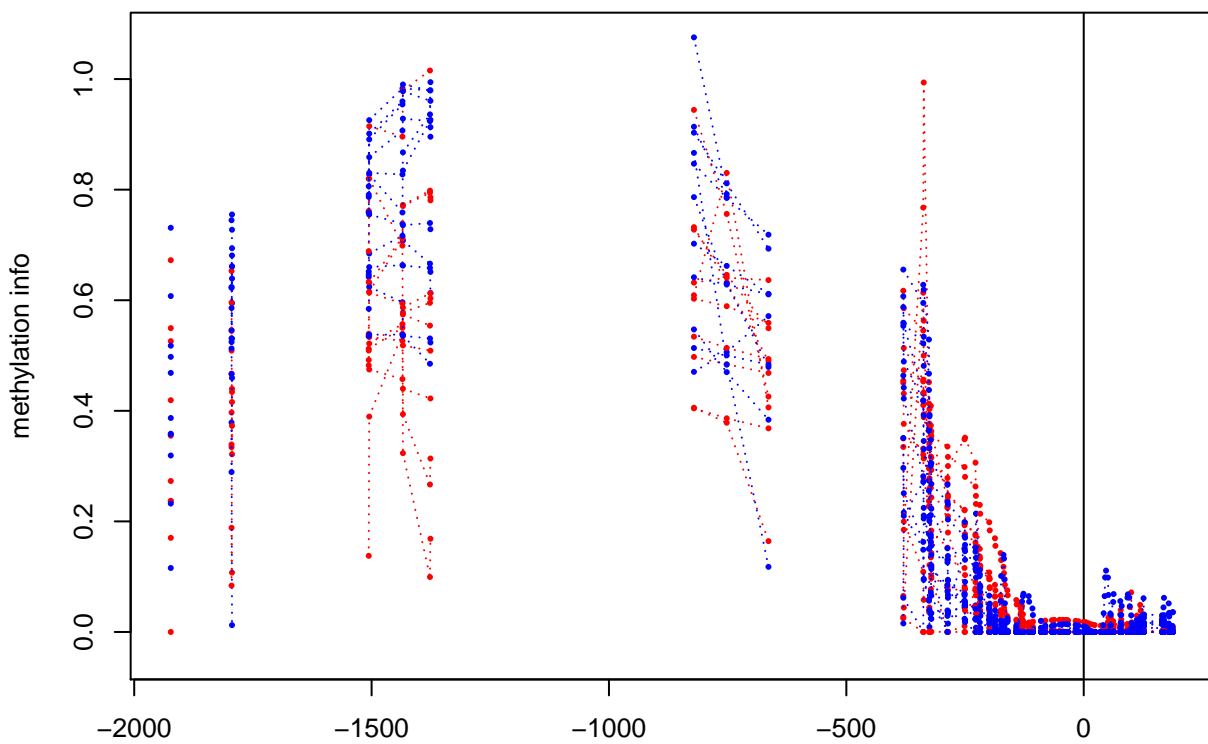

RNAseq logFC(UC-N)= 1.24

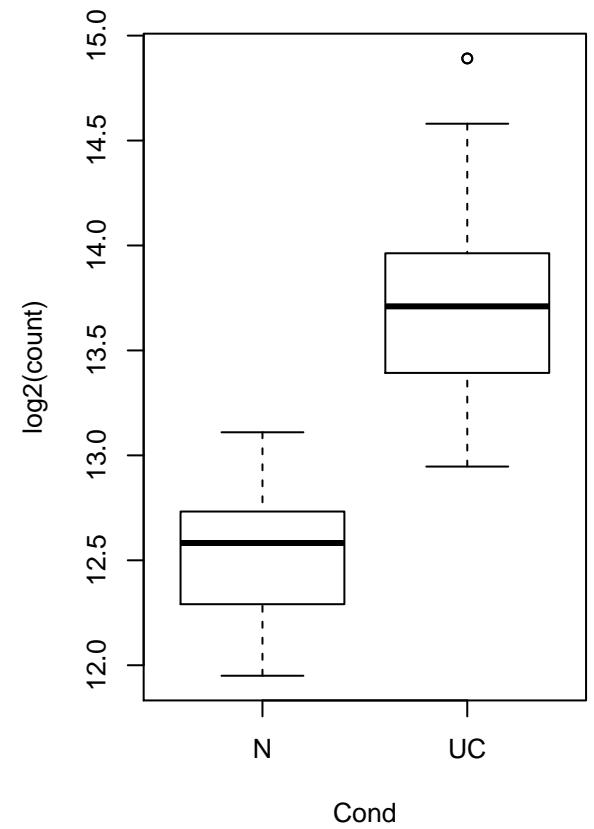

HK3 average UC-N %methylation max=-7.23% min=-23.28%

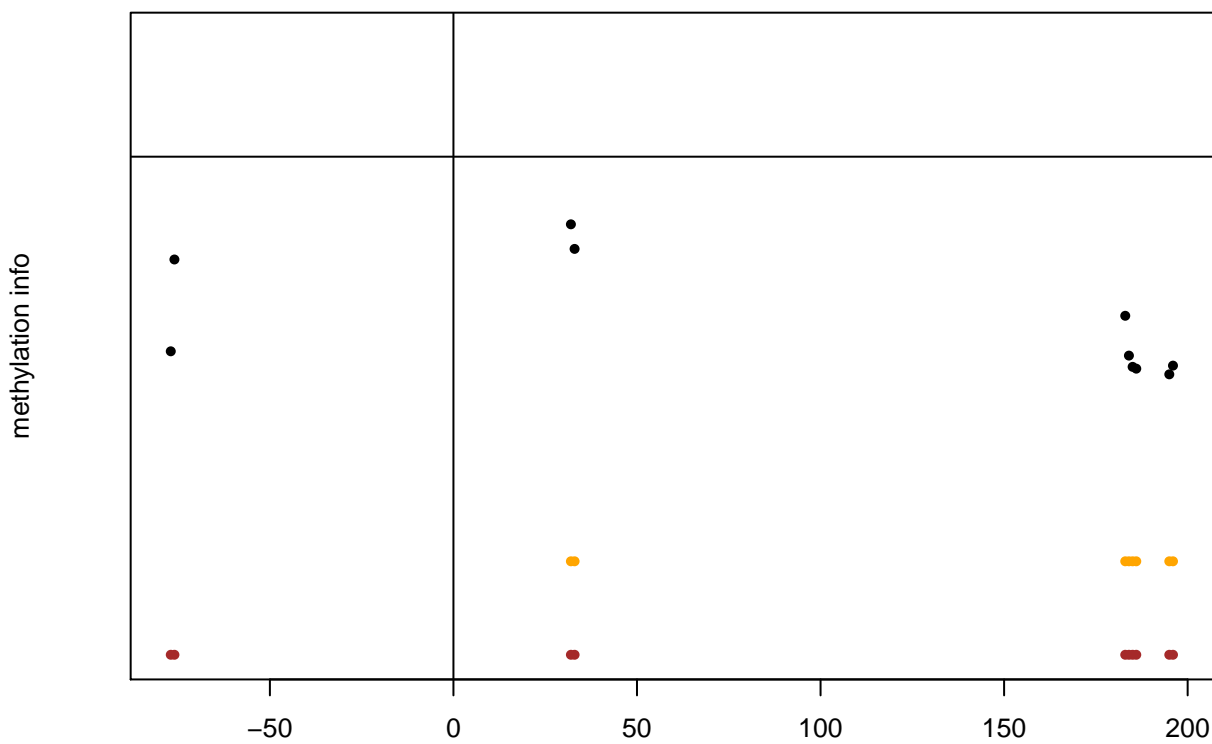

HK3 raw %methylation, red=UC, blue=Normal

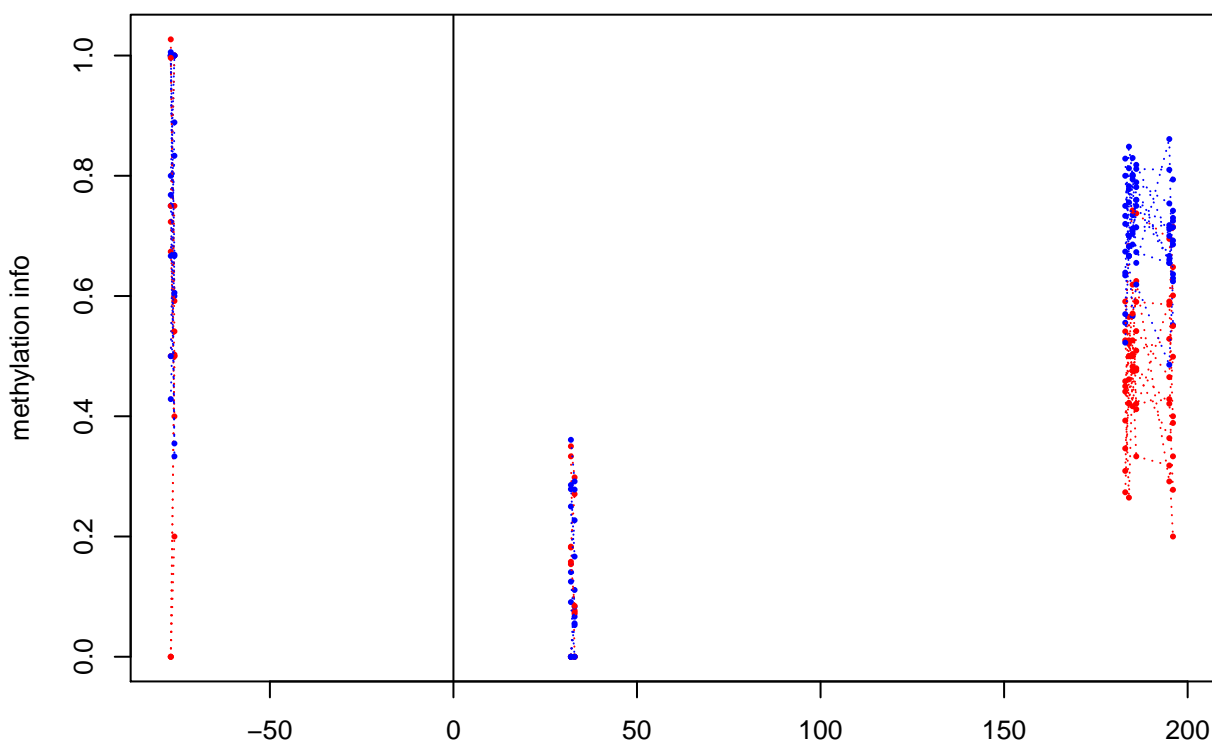

RNAseq logFC(UC-N)= 1.41

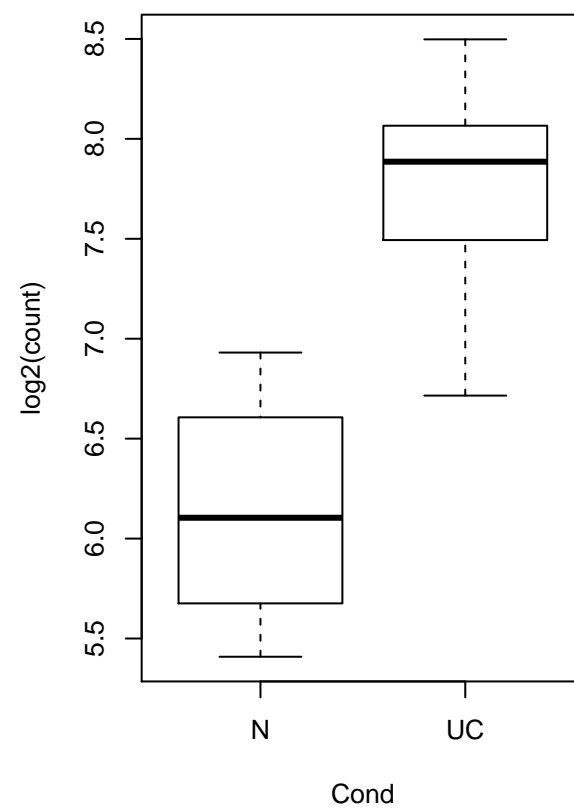



HLF average UC-N %methylation max=3.58% min=0.01%

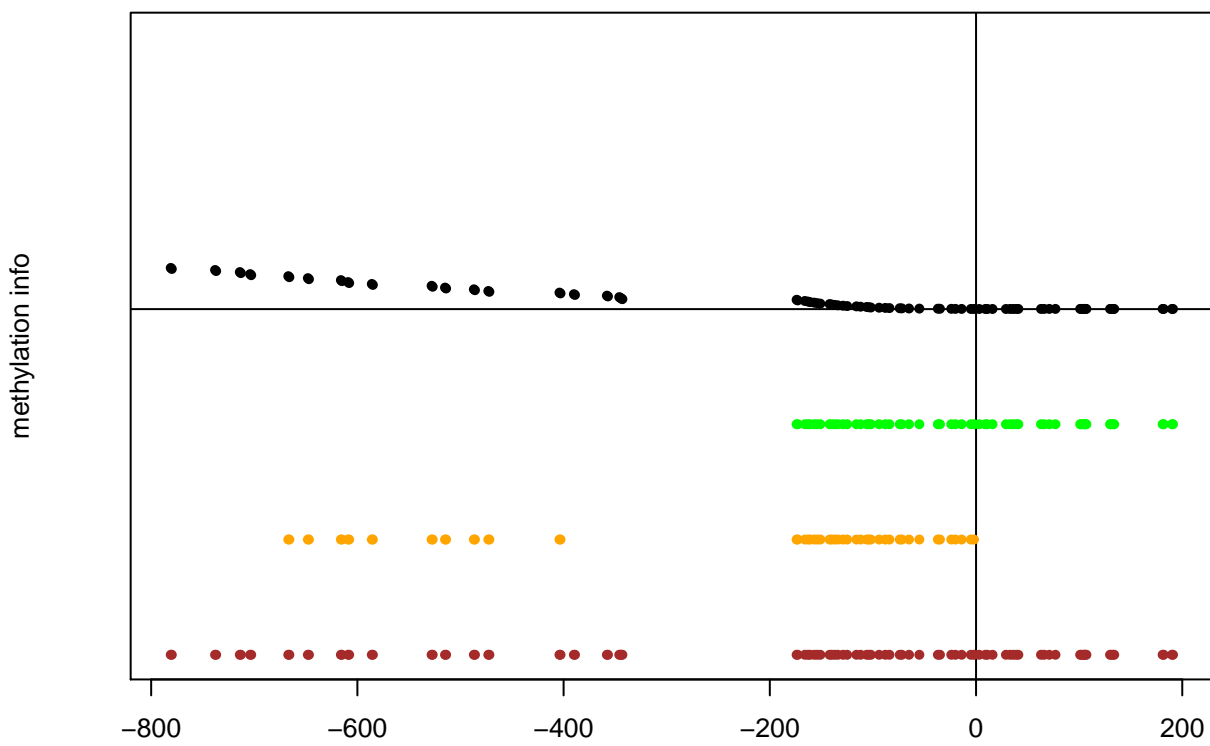

HLF raw %methylation, red=UC, blue=Normal

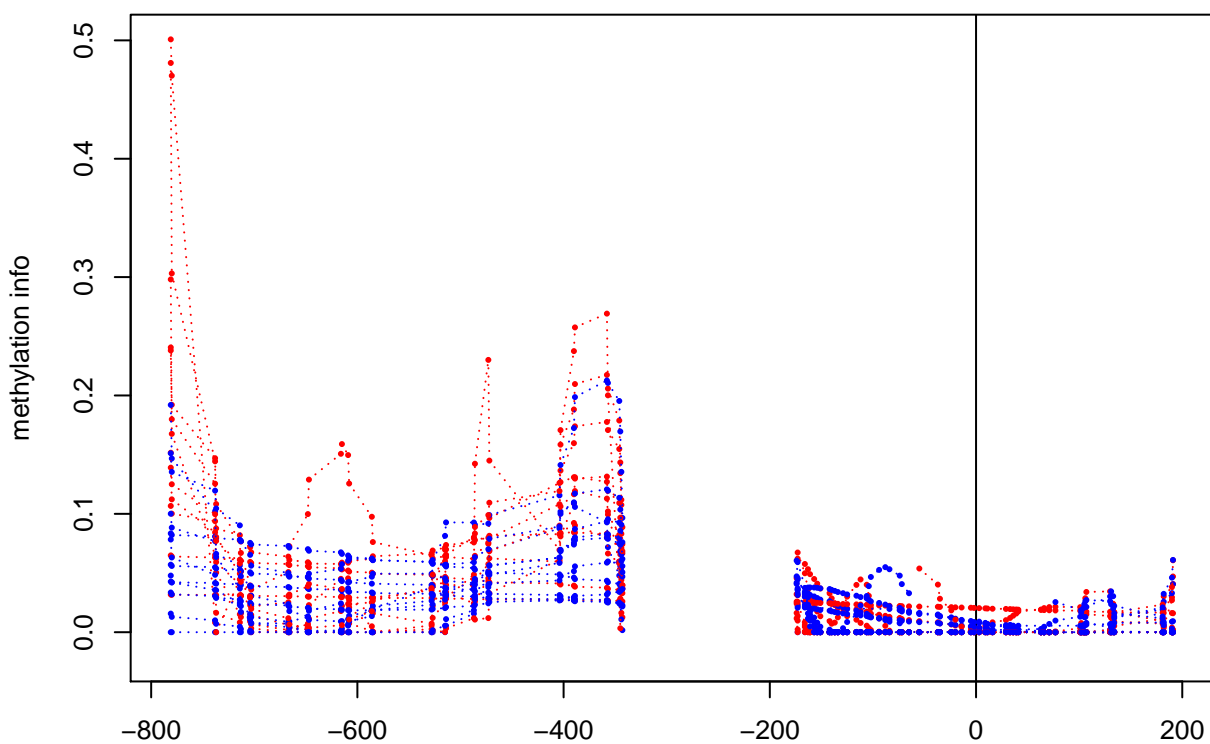

RNAseq logFC(UC-N)= -1.32

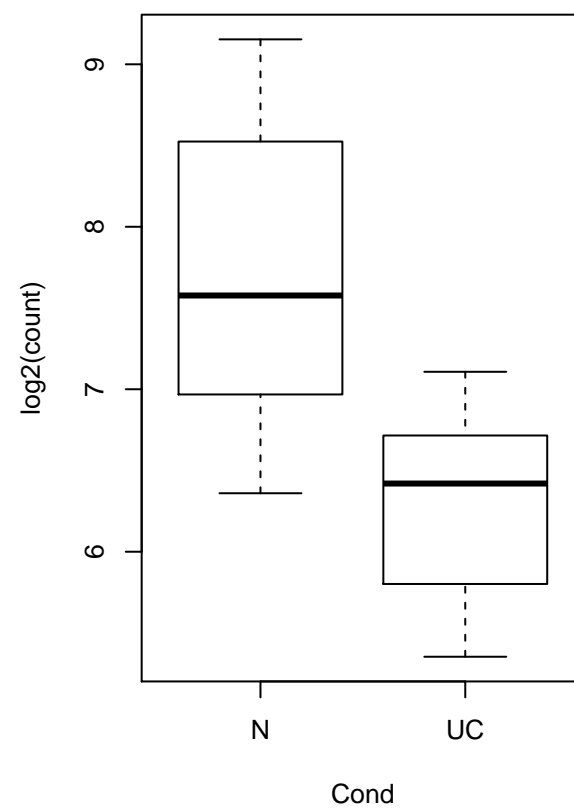

HMGCS2 average UC-N %methylation max=19.87% min=9.46%

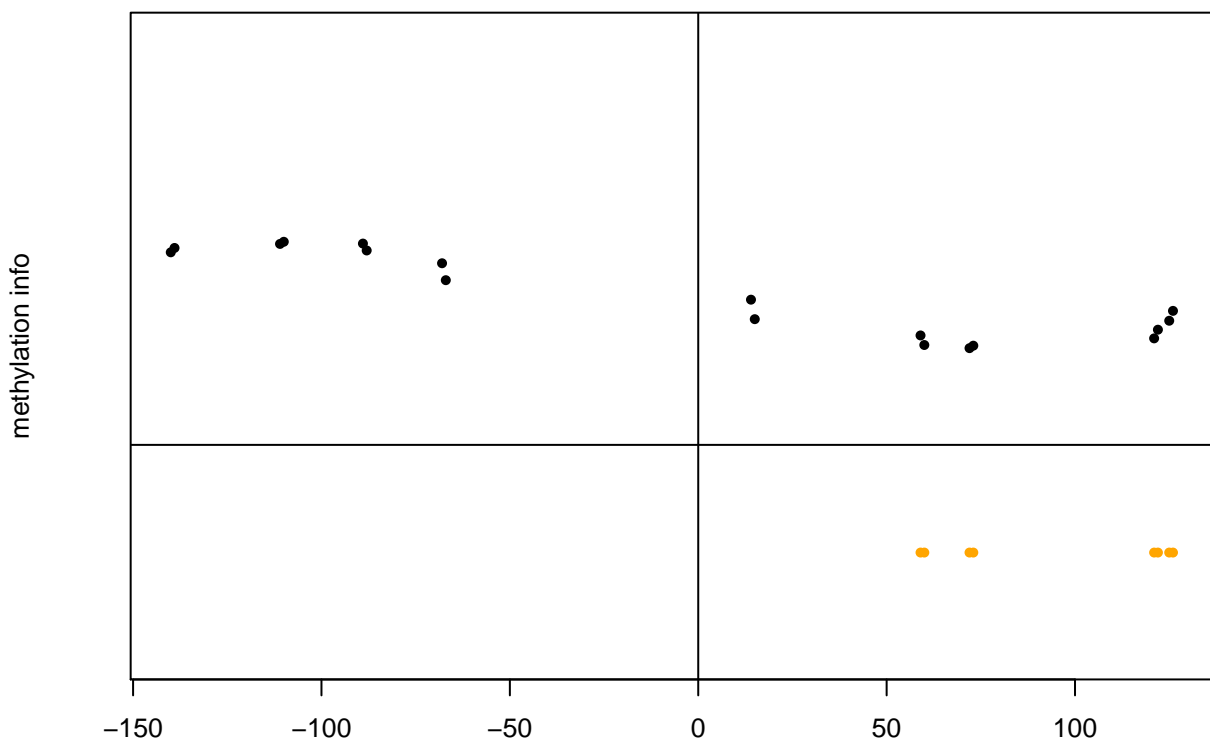

HMGCS2 raw %methylation, red=UC, blue=Normal

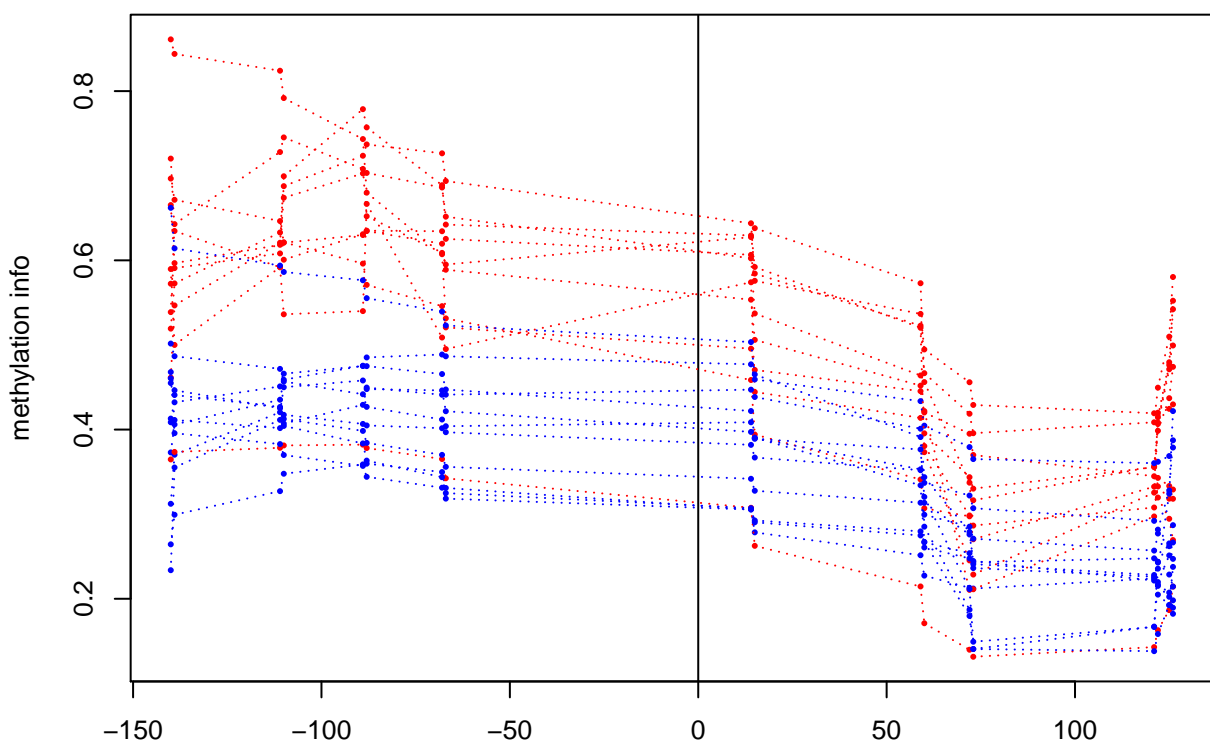

RNAseq logFC(UC-N)= -2.41

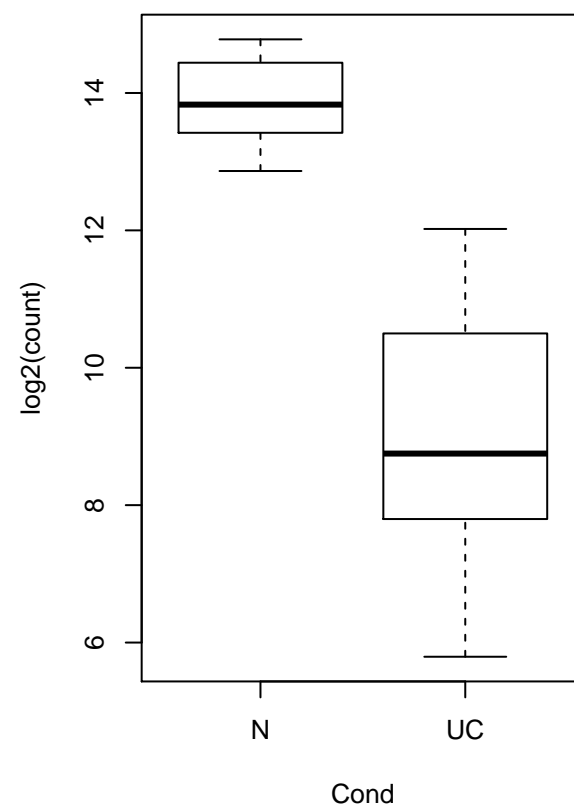

HOXA5 average UC-N %methylation max=21.05% min=3.7%

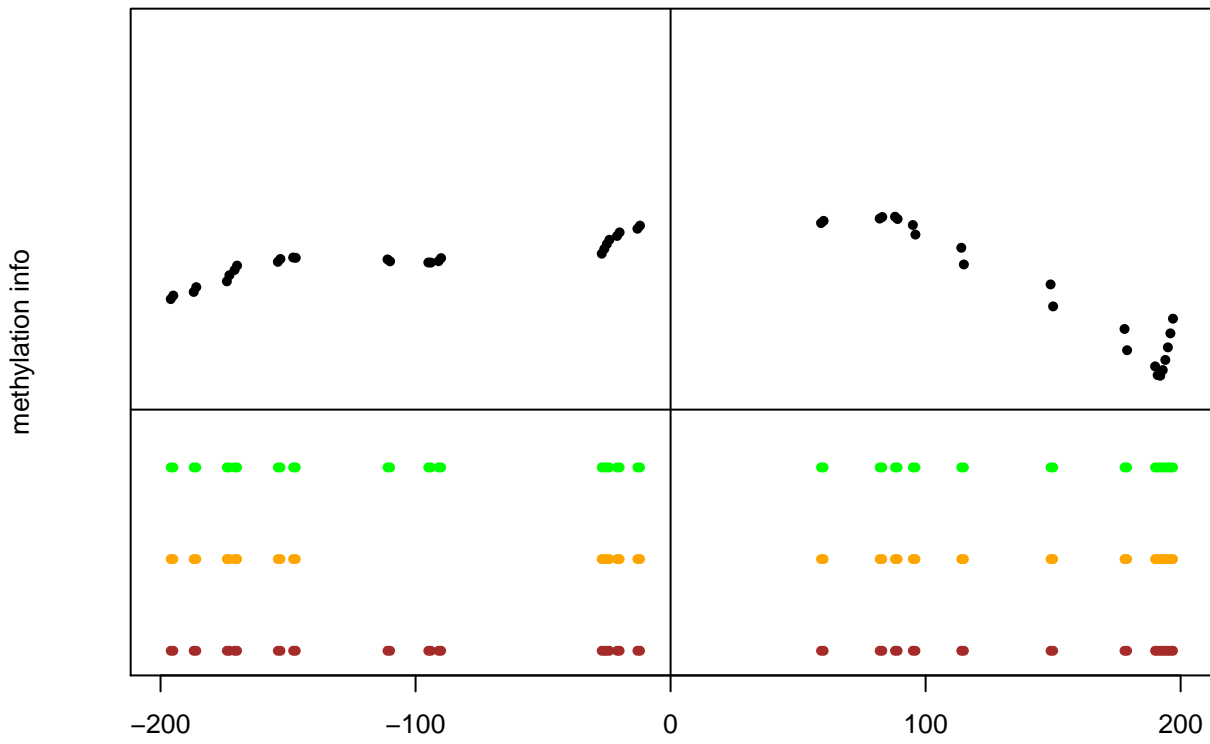

HOXA5 raw %methylation, red=UC, blue=Normal

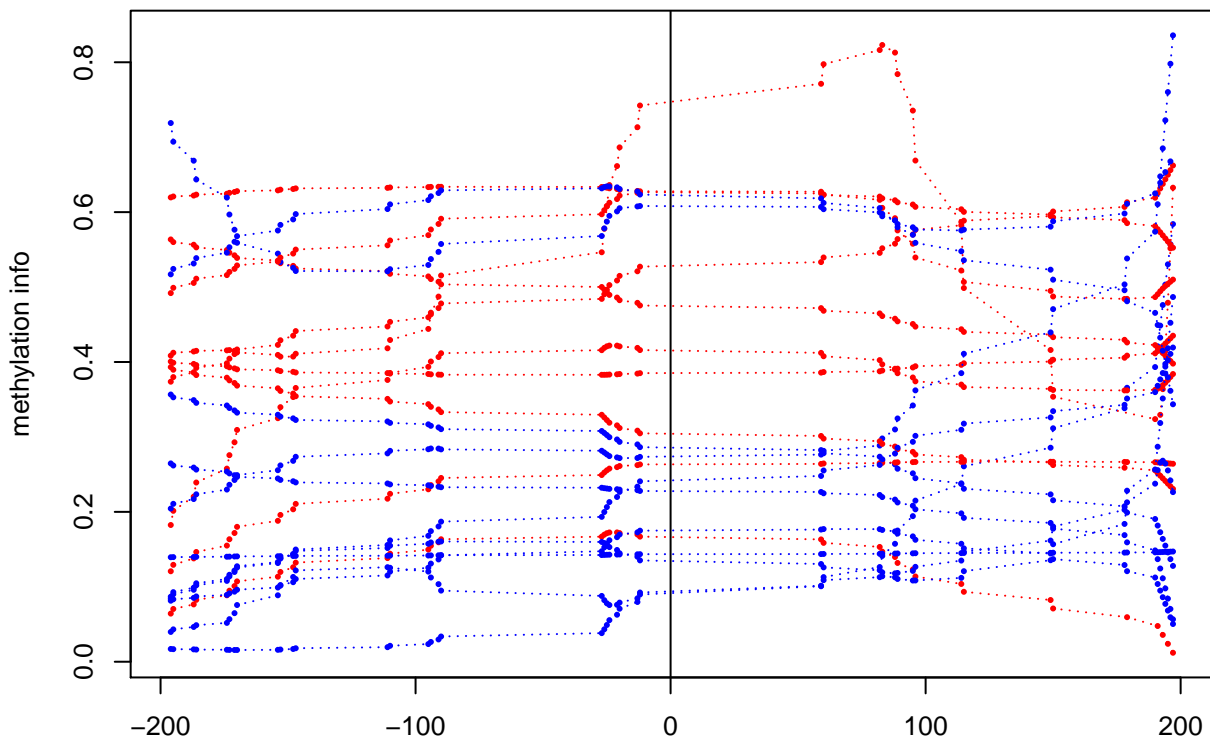

RNAseq logFC(UC-N)= -1.02

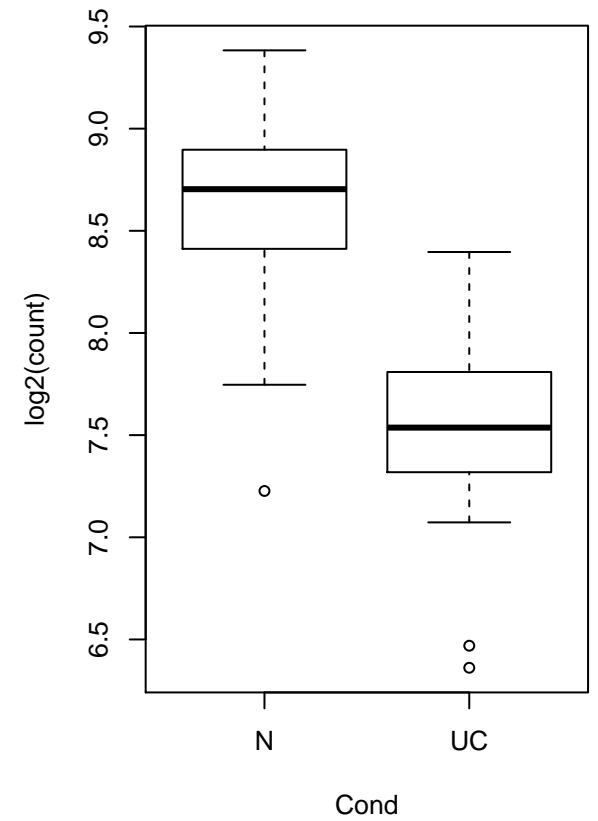

HOXA6 average UC-N %methylation max=8.63% min=0.2%

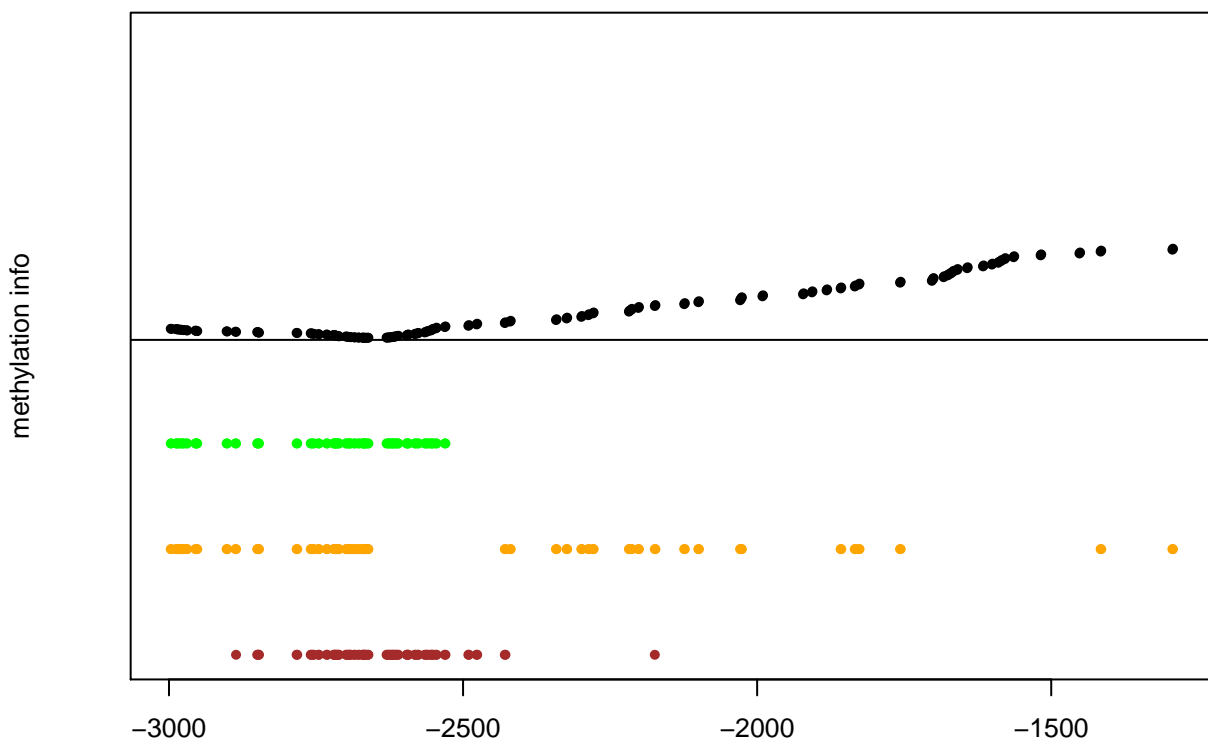

HOXA6 raw %methylation, red=UC, blue=Normal

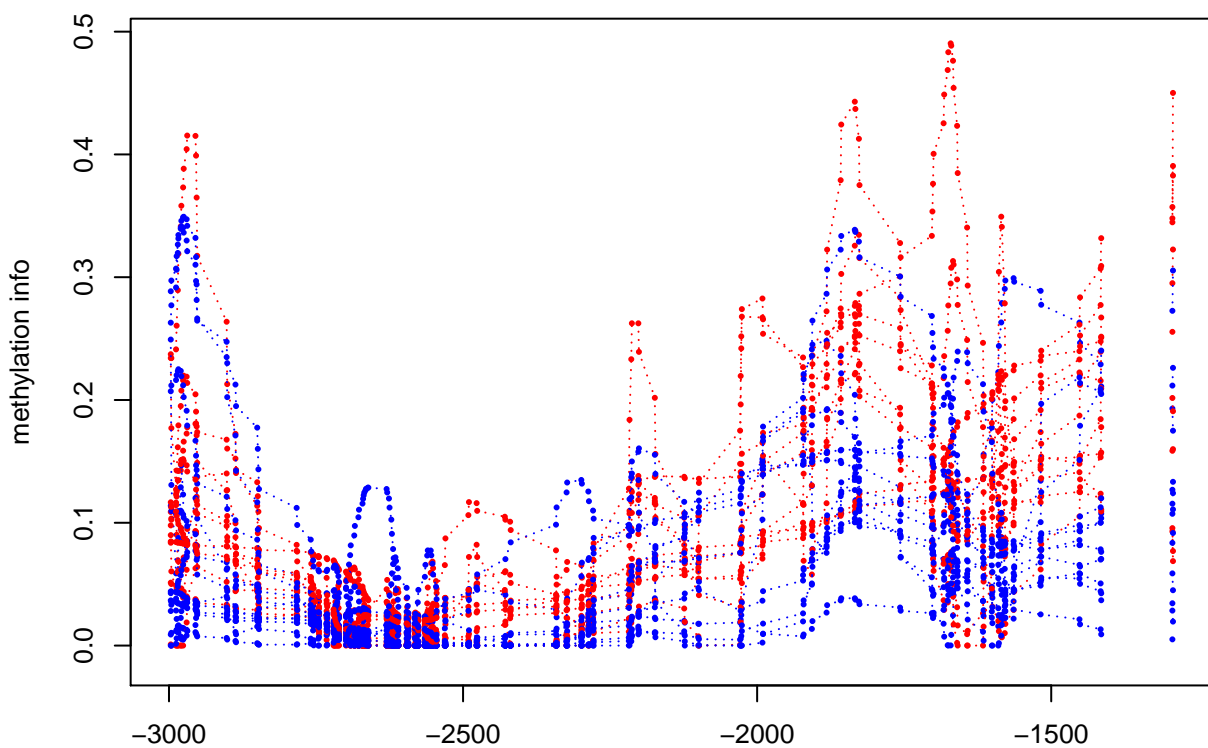

RNAseq logFC(UC-N)= -1.16

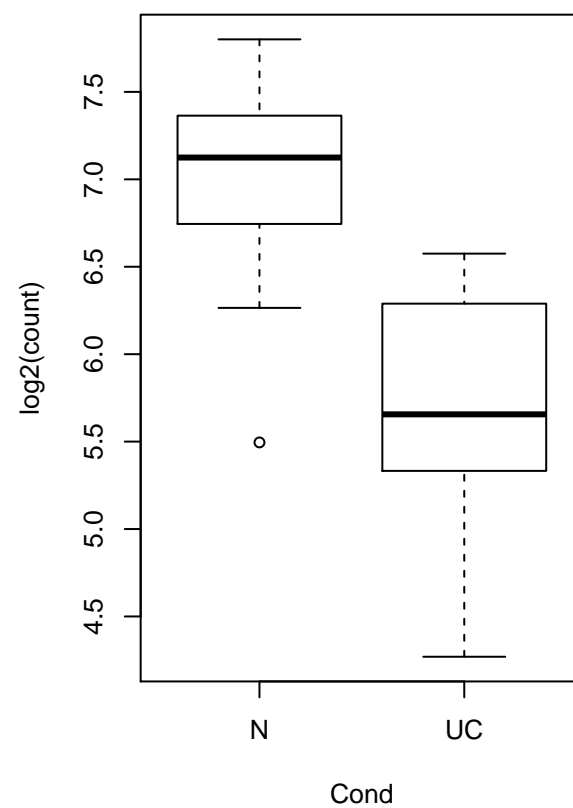

HOXA-AS3 average UC-N %methylation max=30.2% min=-3.83%

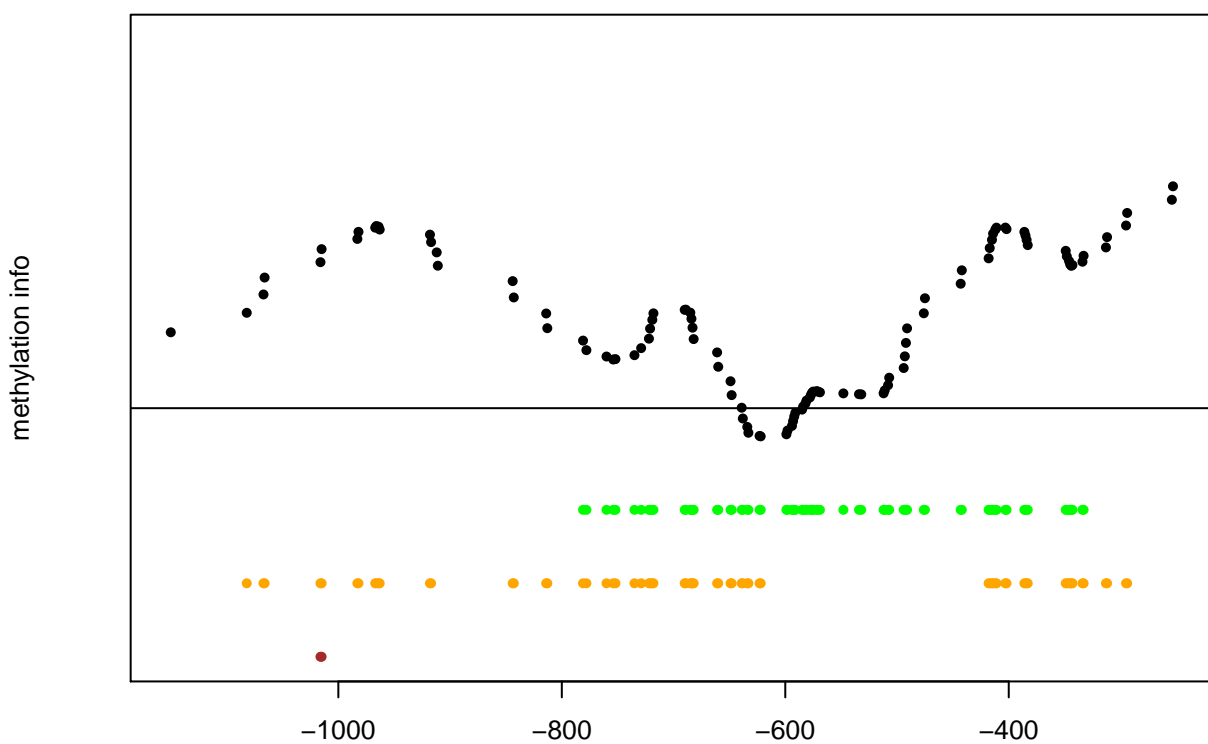

HOXA-AS3 raw %methylation, red=UC, blue=Normal

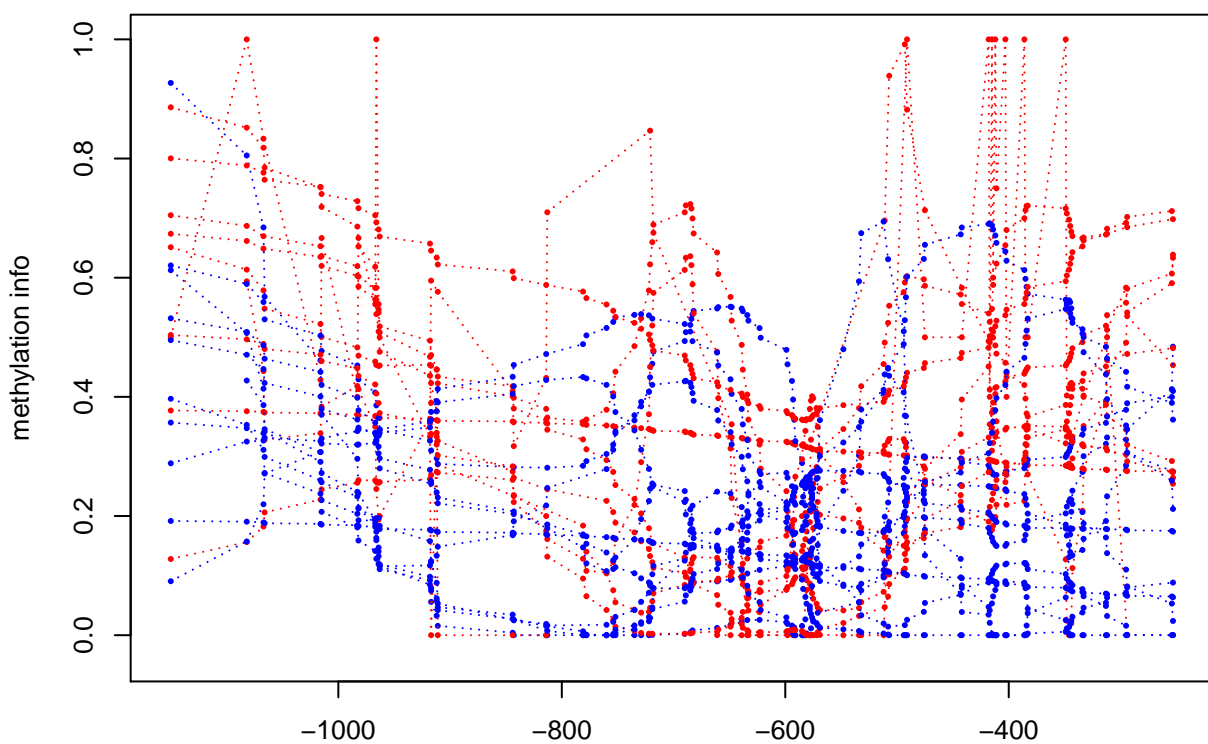

RNAseq logFC(UC-N)= -1.16

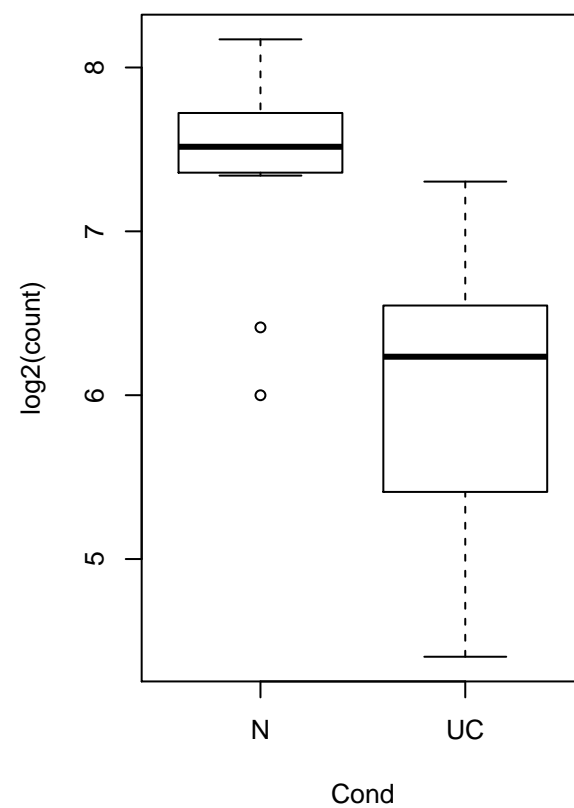

HSD17B2 average UC-N %methylation max=36.11% min=-18.56%

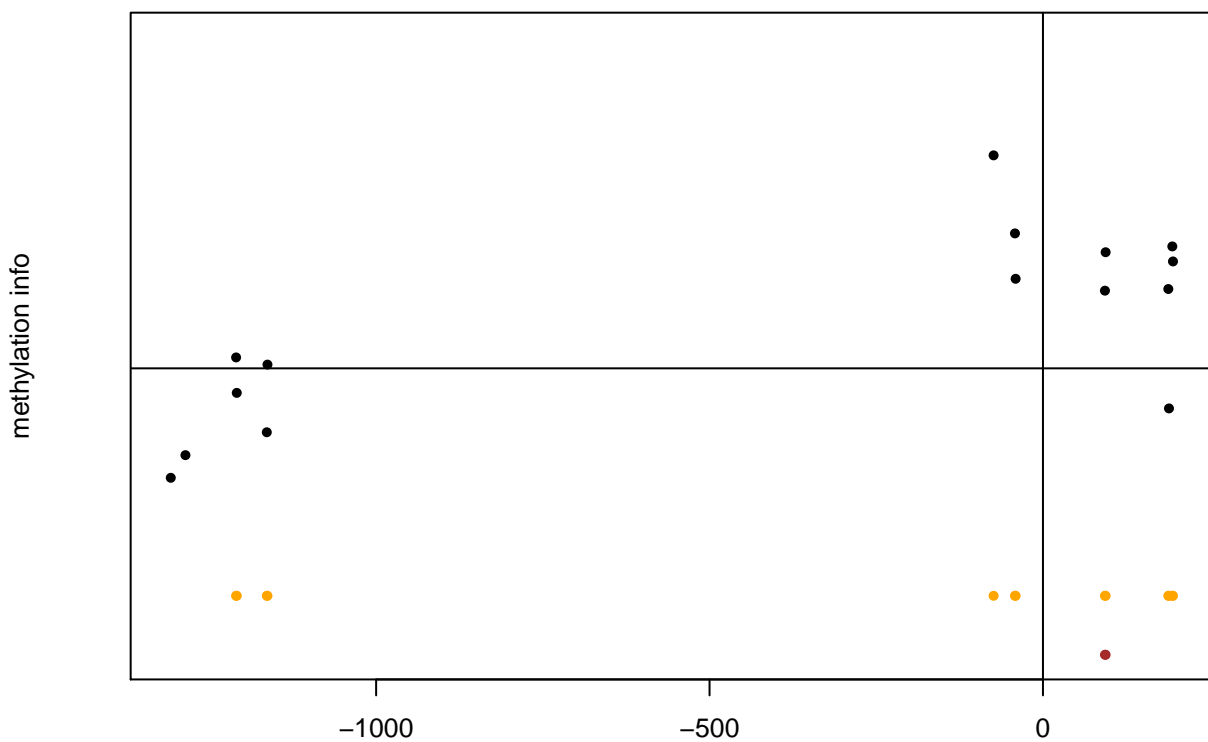

HSD17B2 raw %methylation, red=UC, blue=Normal

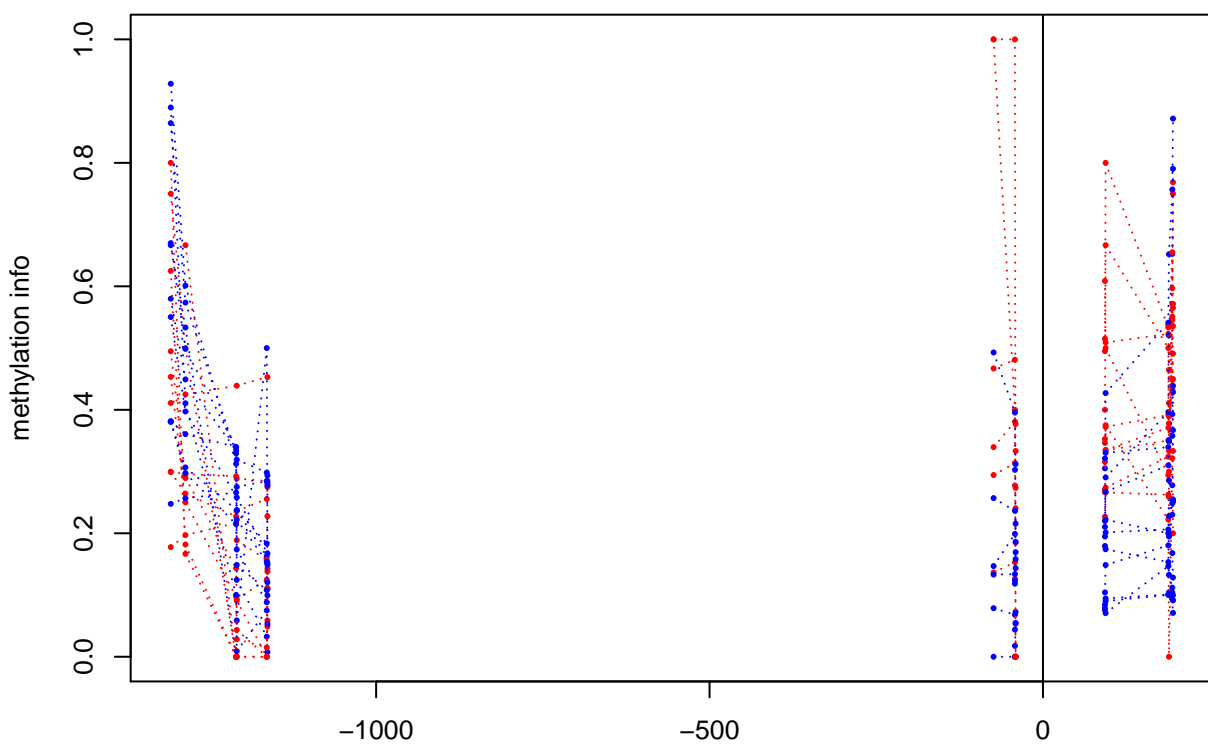

RNAseq logFC(UC-N)= -2.11

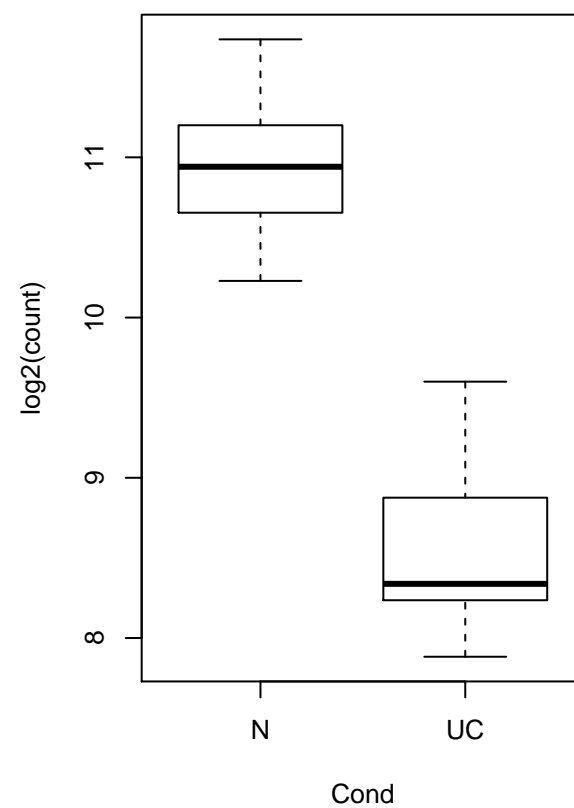

ICAM1 average UC-N %methylation max=5.04% min=-17.37%

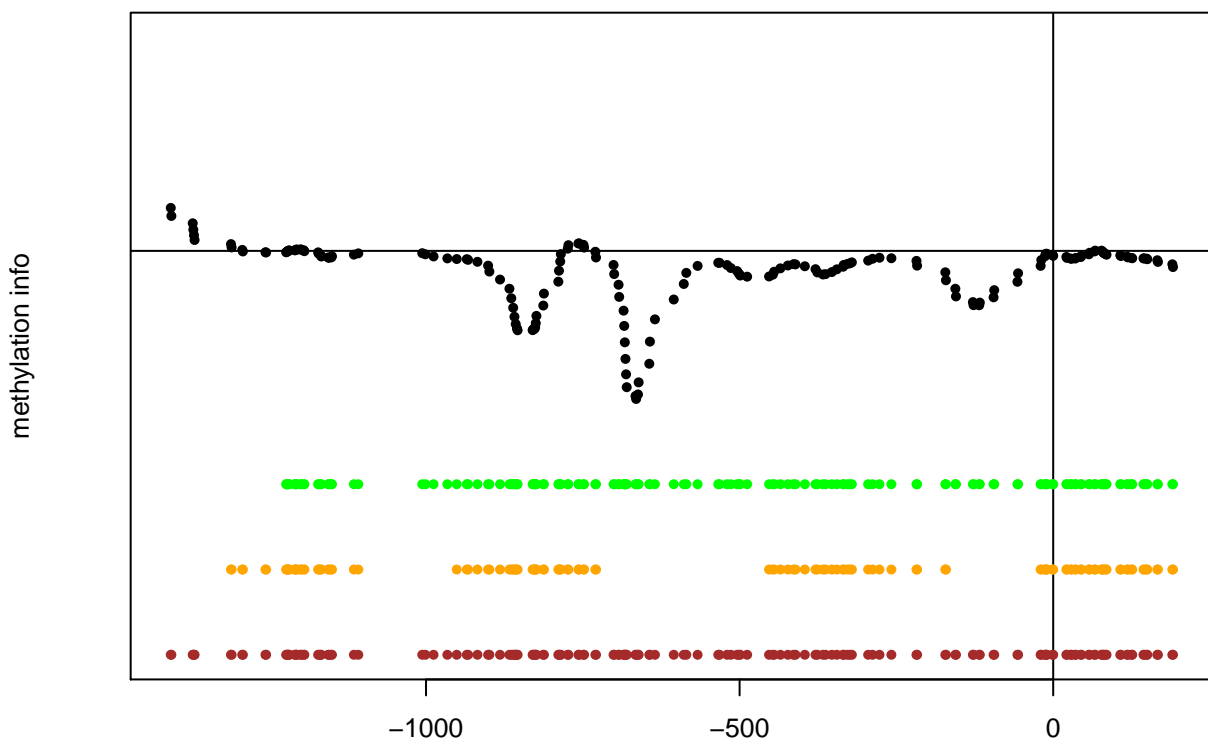

ICAM1 raw %methylation, red=UC, blue=Normal

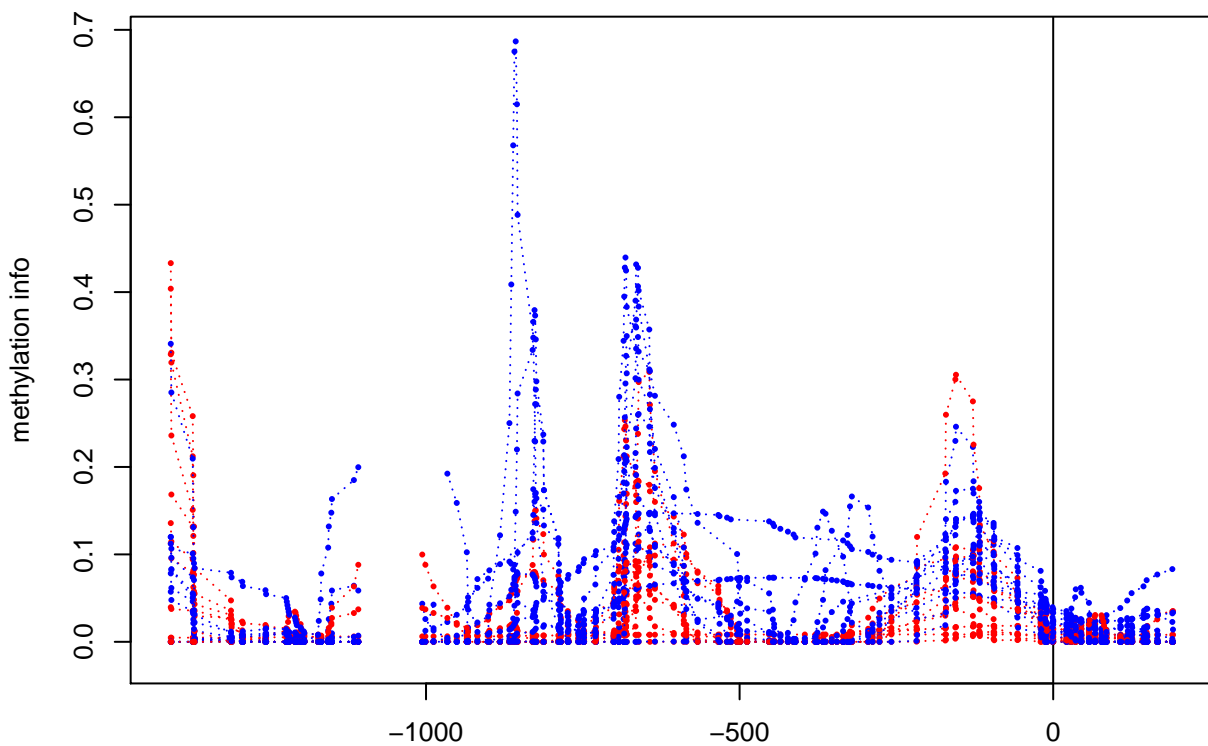

RNAseq logFC(UC-N)= 1.97

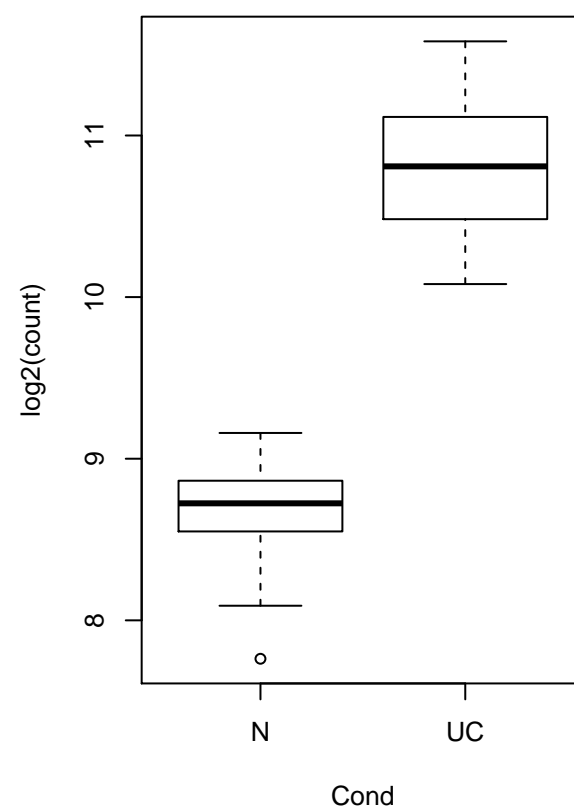

ICOS average UC-N %methylation max=-2.12% min=-21.02%

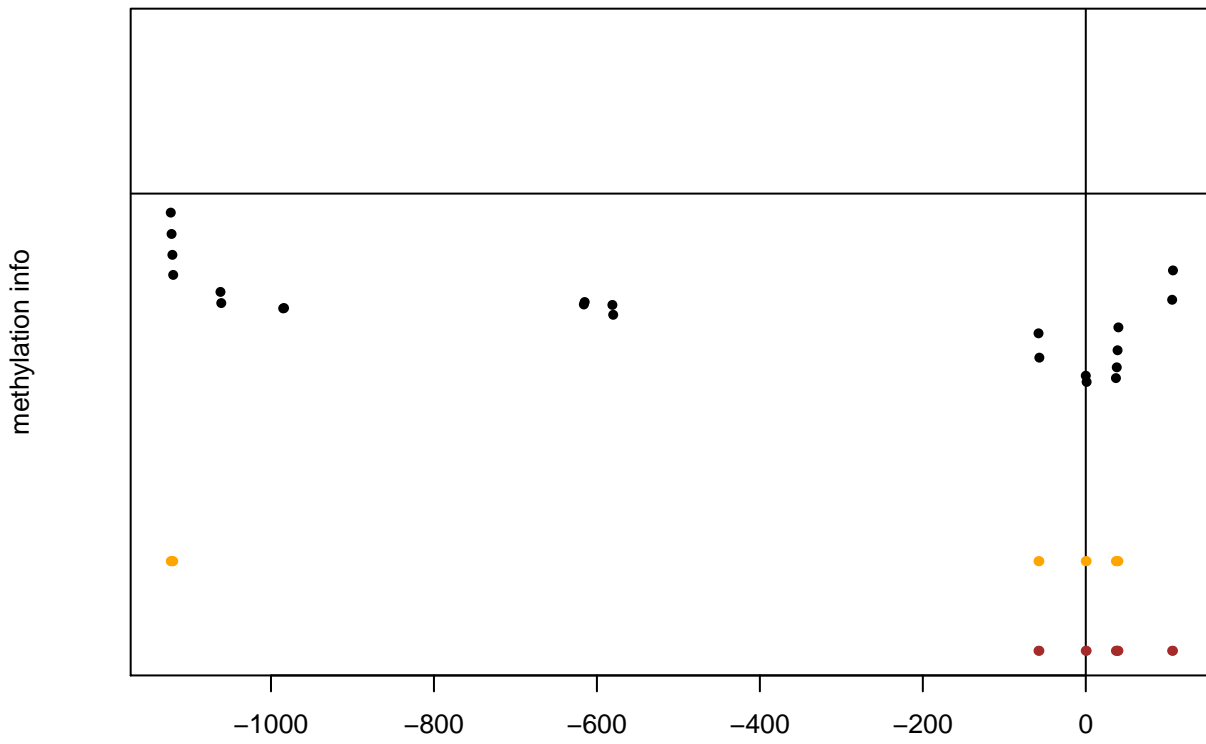

ICOS raw %methylation, red=UC, blue=Normal

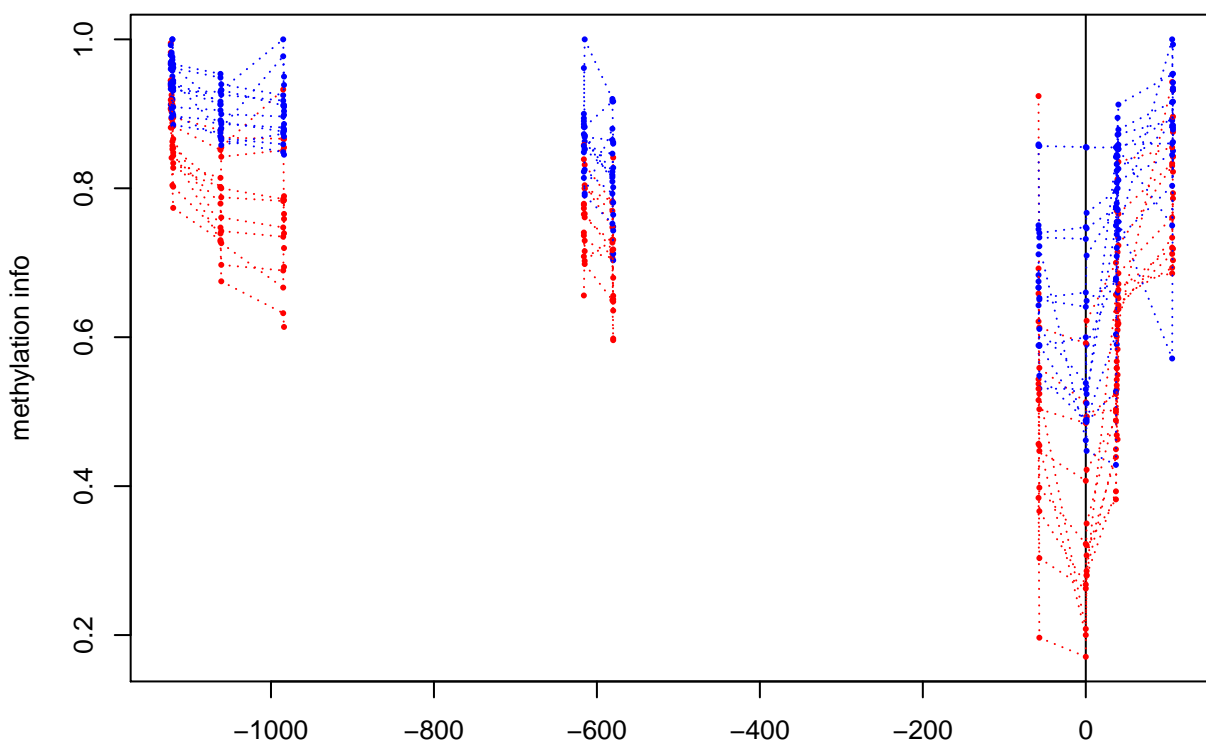

RNAseq logFC(UC-N)= 1.92

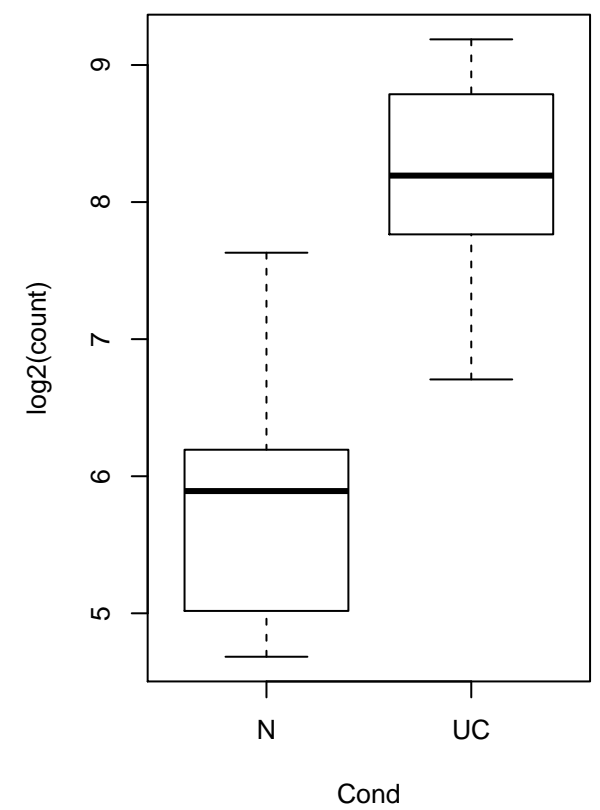



IFNG-AS1 average UC-N %methylation max=-10.24% min=-27.72%

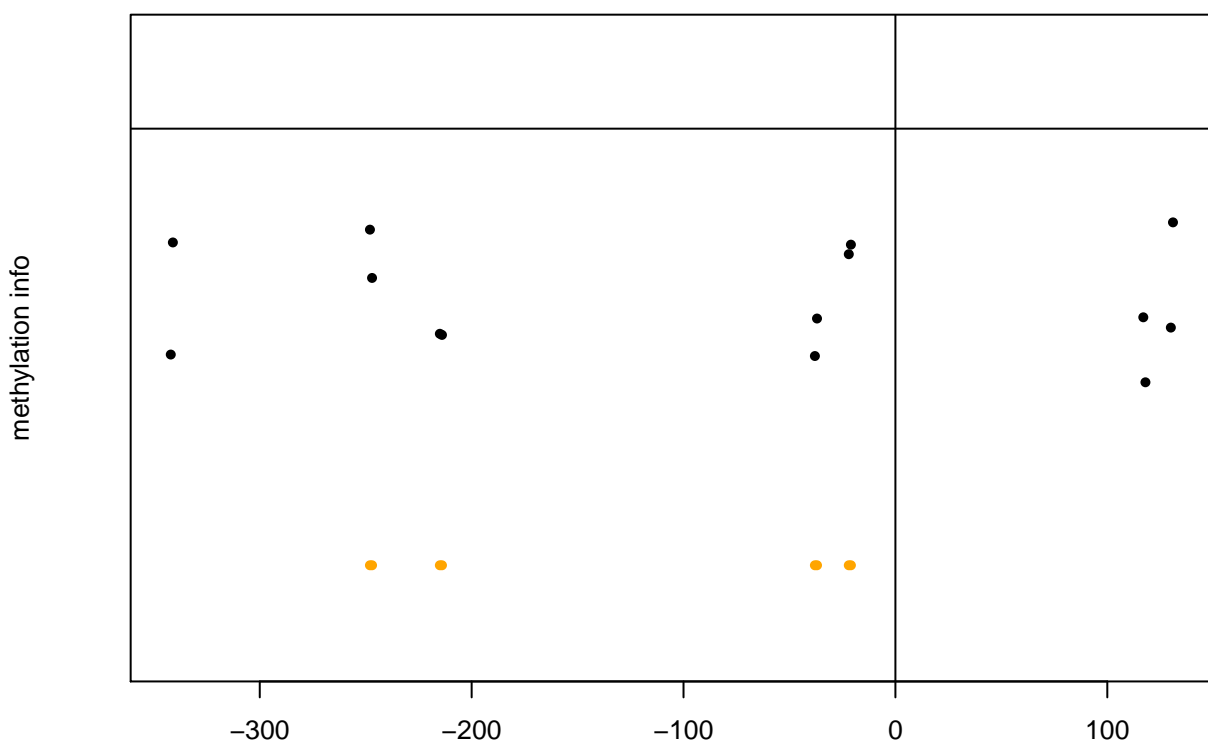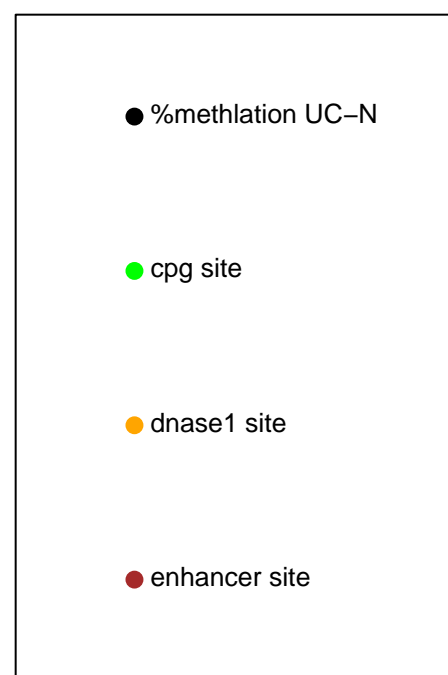

IFNG-AS1 raw %methylation, red=UC, blue=Normal

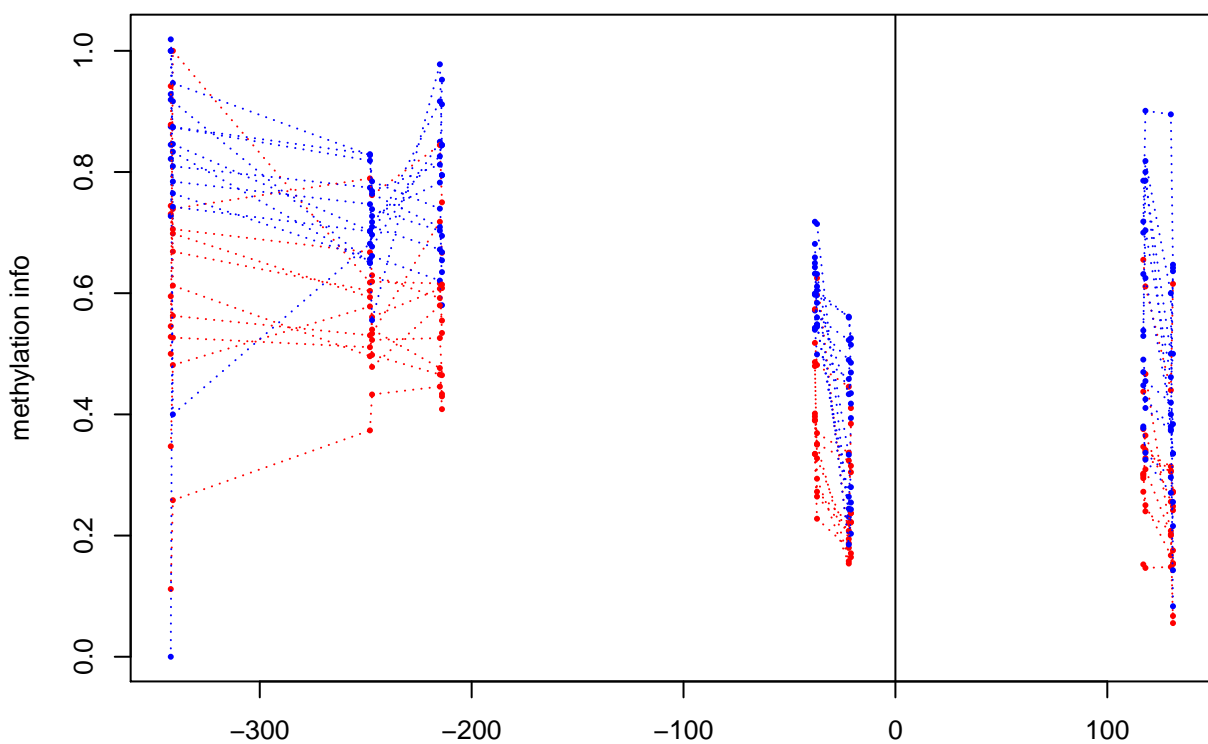

RNAseq logFC(UC-N)= 1.19

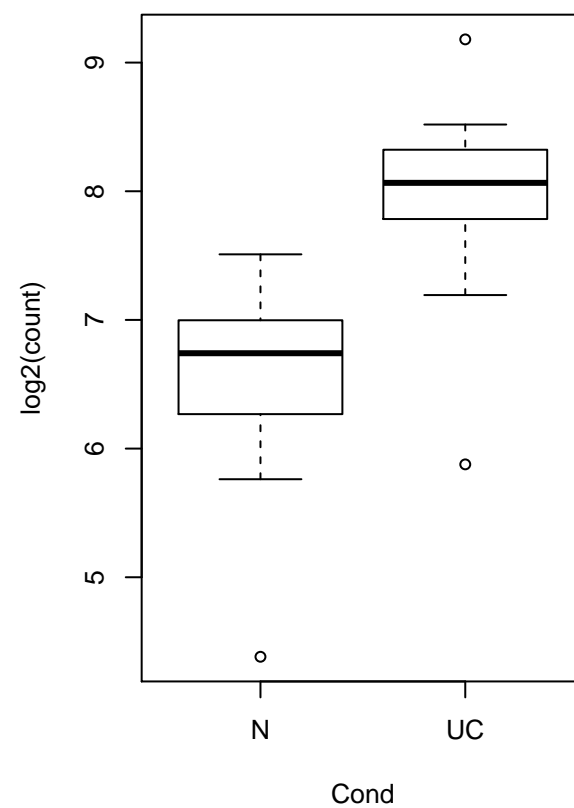

IFNG average UC-N %methylation max=-9.3% min=-15.65%

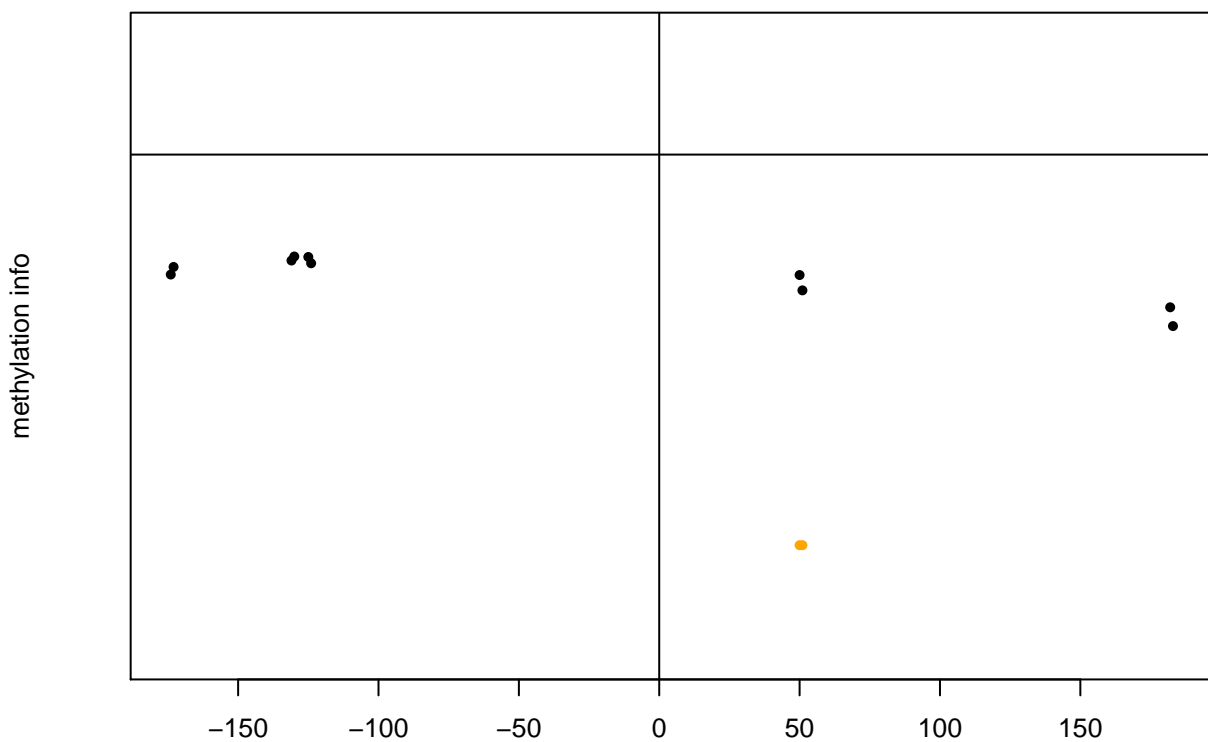

IFNG raw %methylation, red=UC, blue=Normal

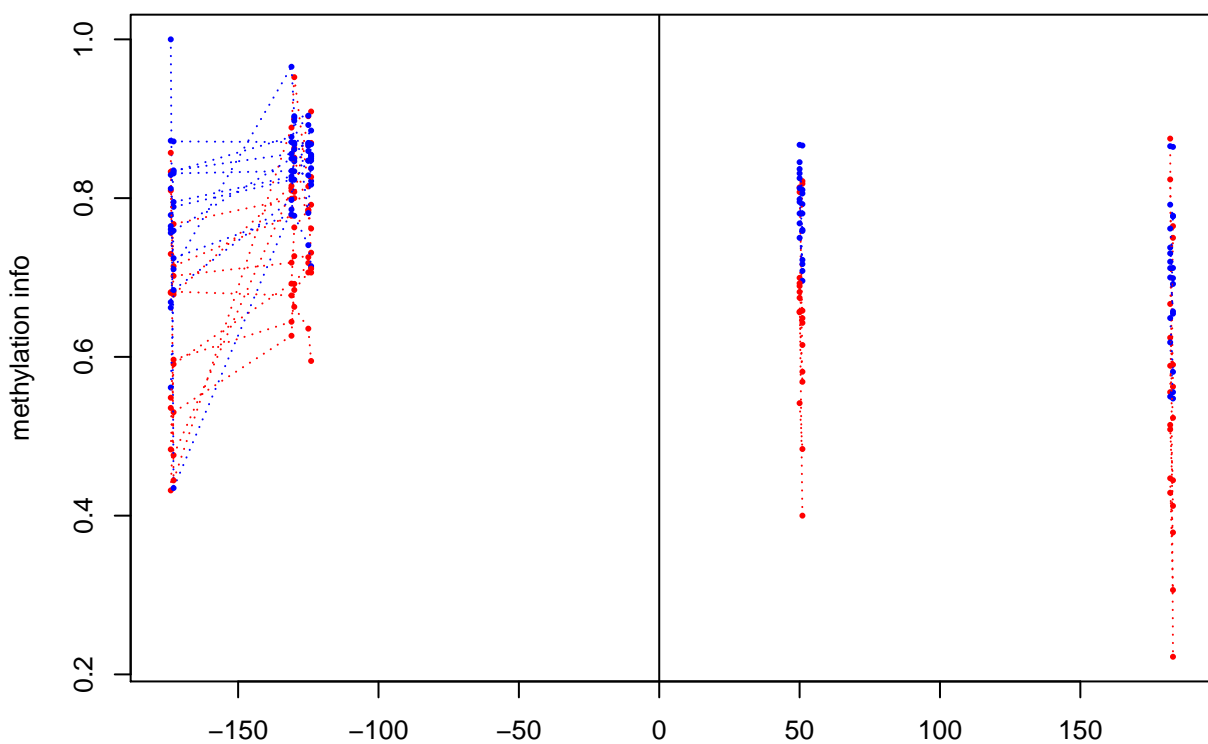

RNAseq logFC(UC-N)= 1.54

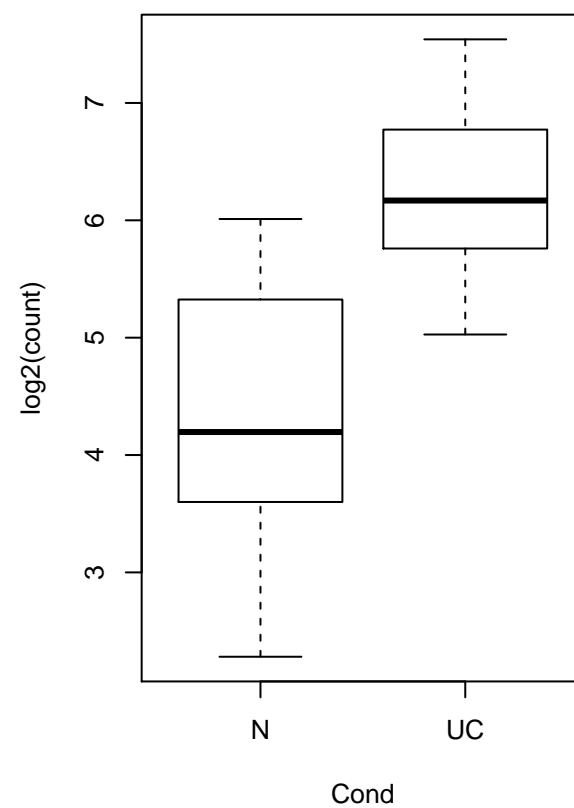

IGFBP5 average UC-N %methylation max=2.82% min=-7.32%

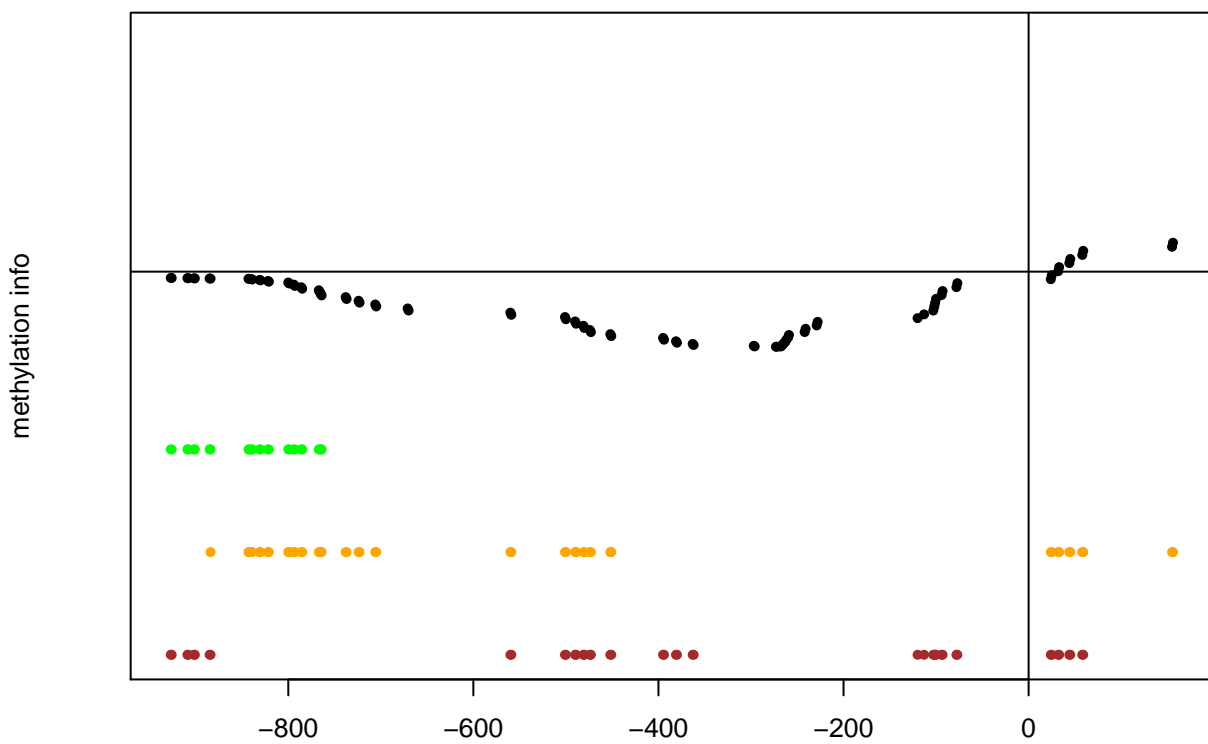

IGFBP5 raw %methylation, red=UC, blue=Normal

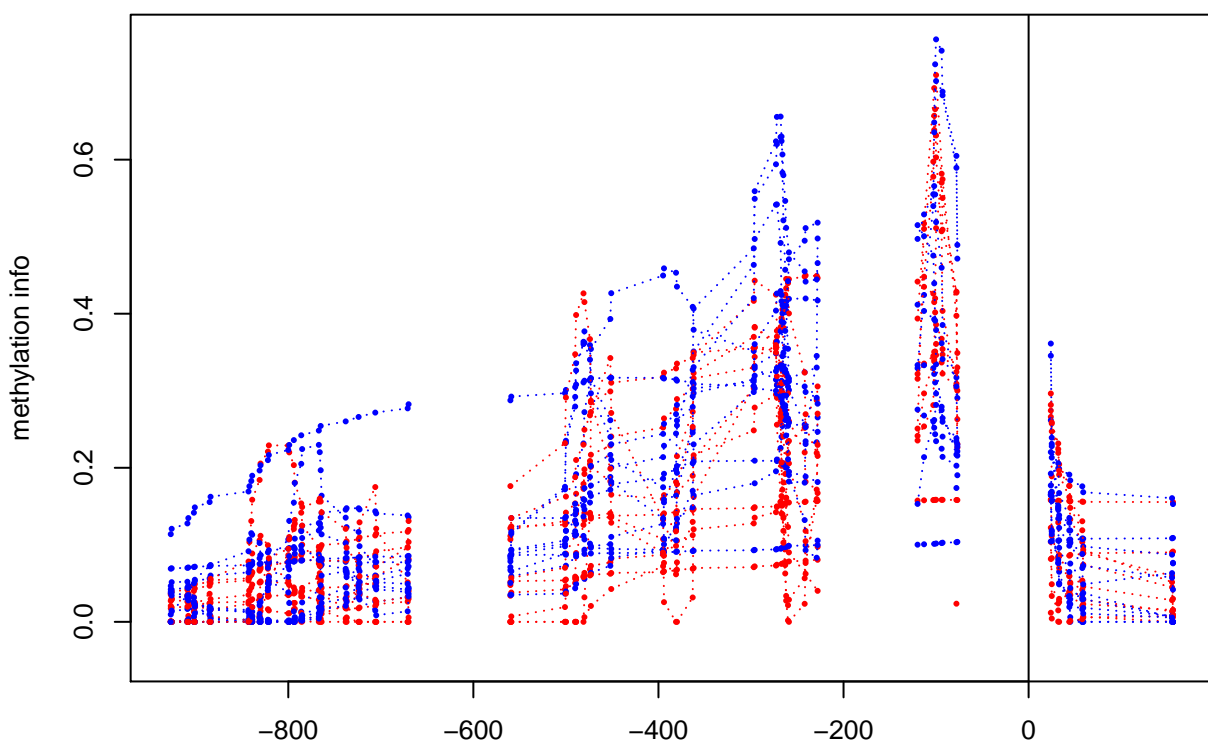

RNAseq logFC(UC-N)= 1.52

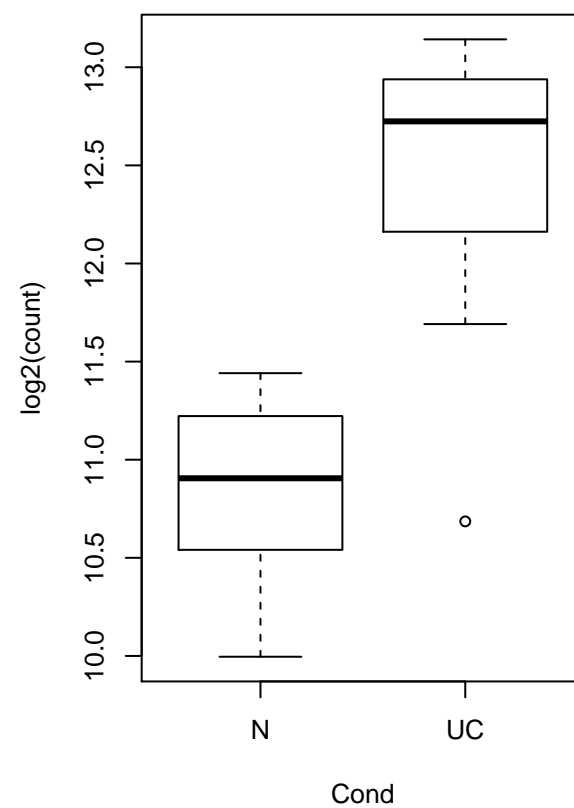

IGFLR1 average UC-N %methylation max=-23.05% min=-34.26%

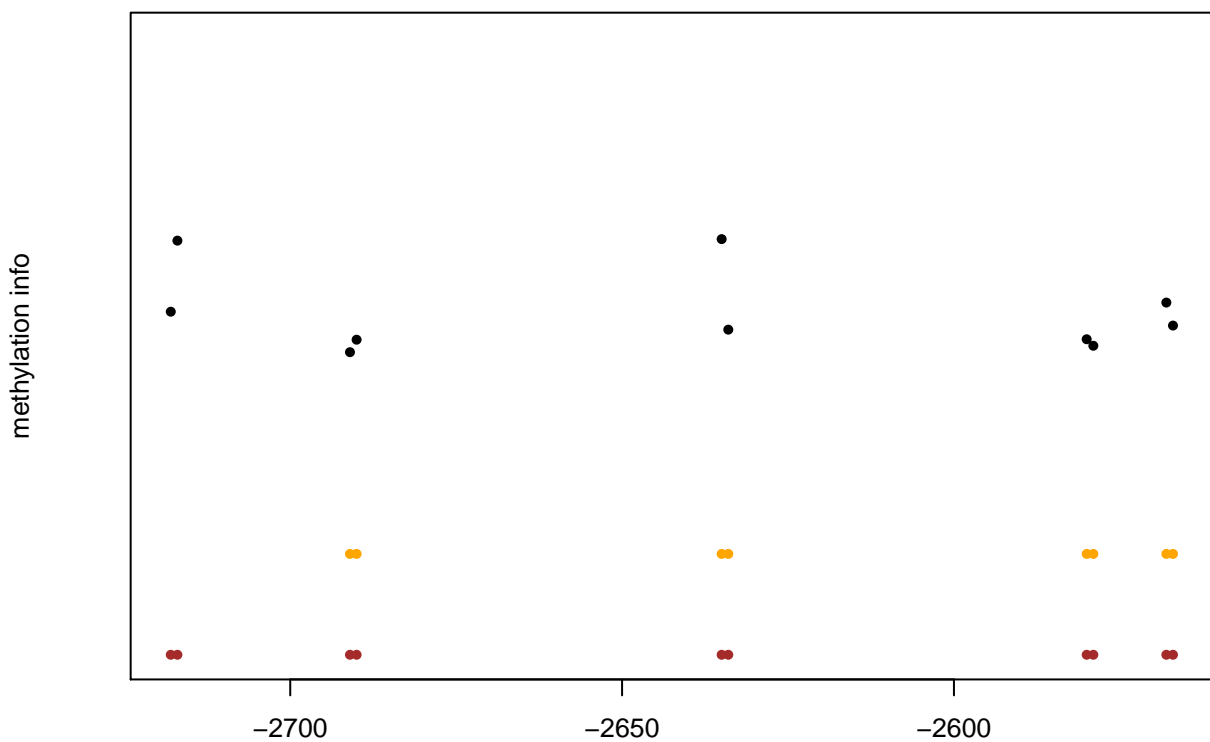

IGFLR1 raw %methylation, red=UC, blue=Normal

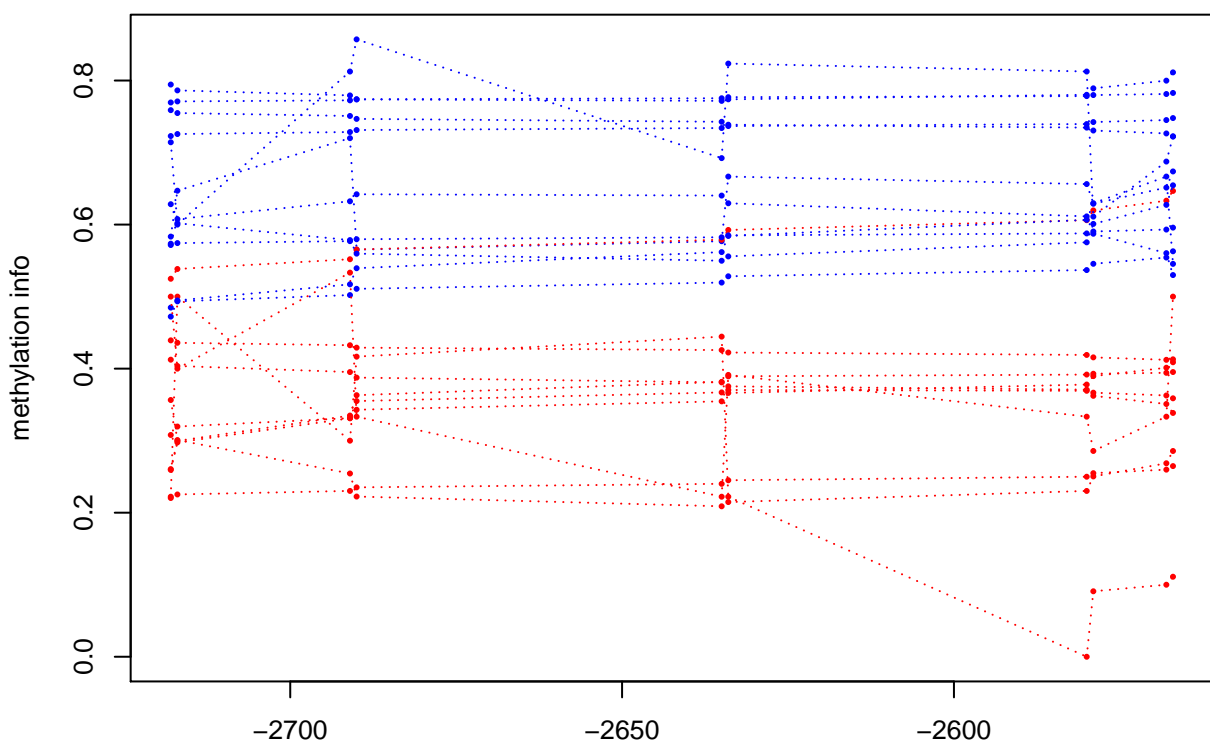

RNAseq logFC(UC-N)= 1.05

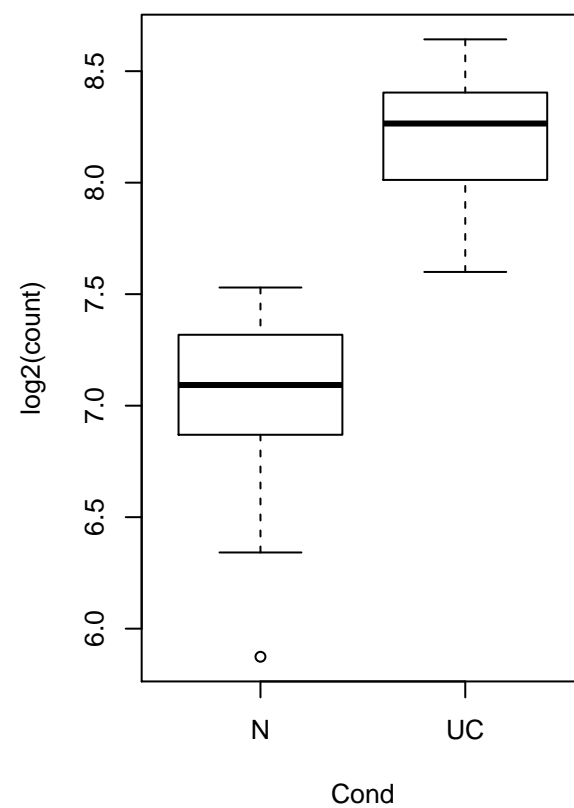

IKZF3 average UC-N %methylation max=9.61% min=-25.89%

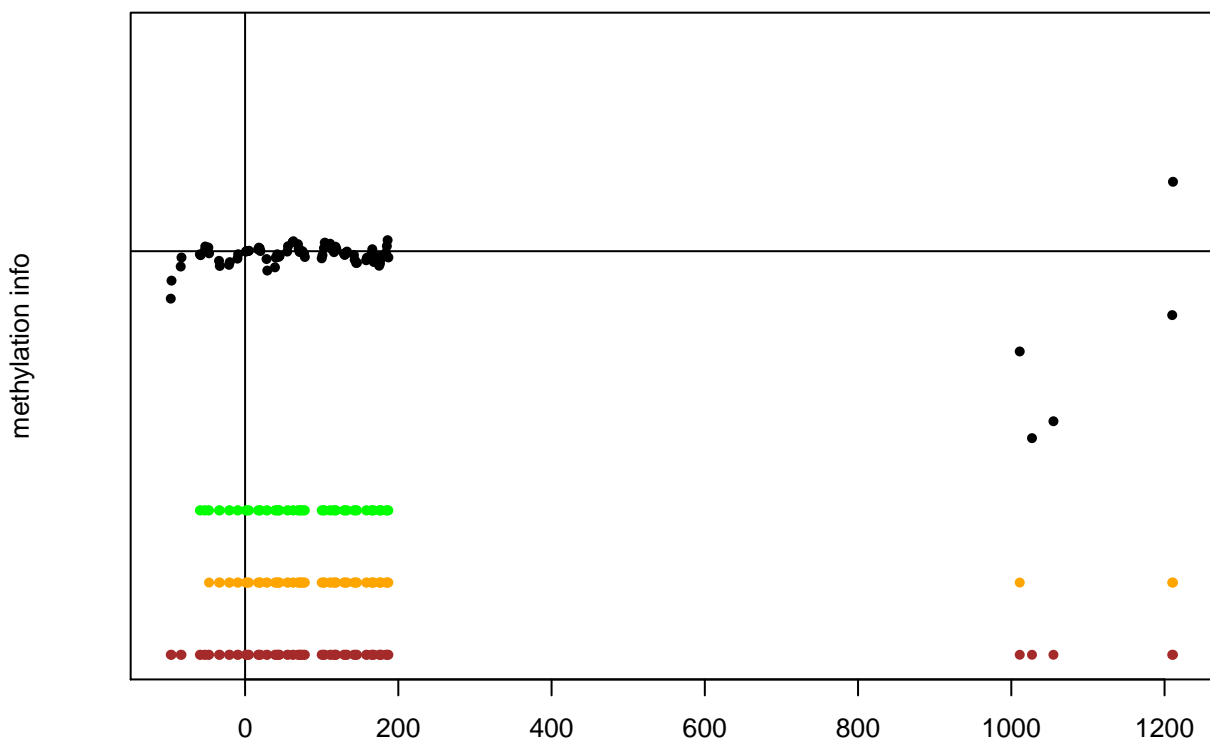

IKZF3 raw %methylation, red=UC, blue=Normal

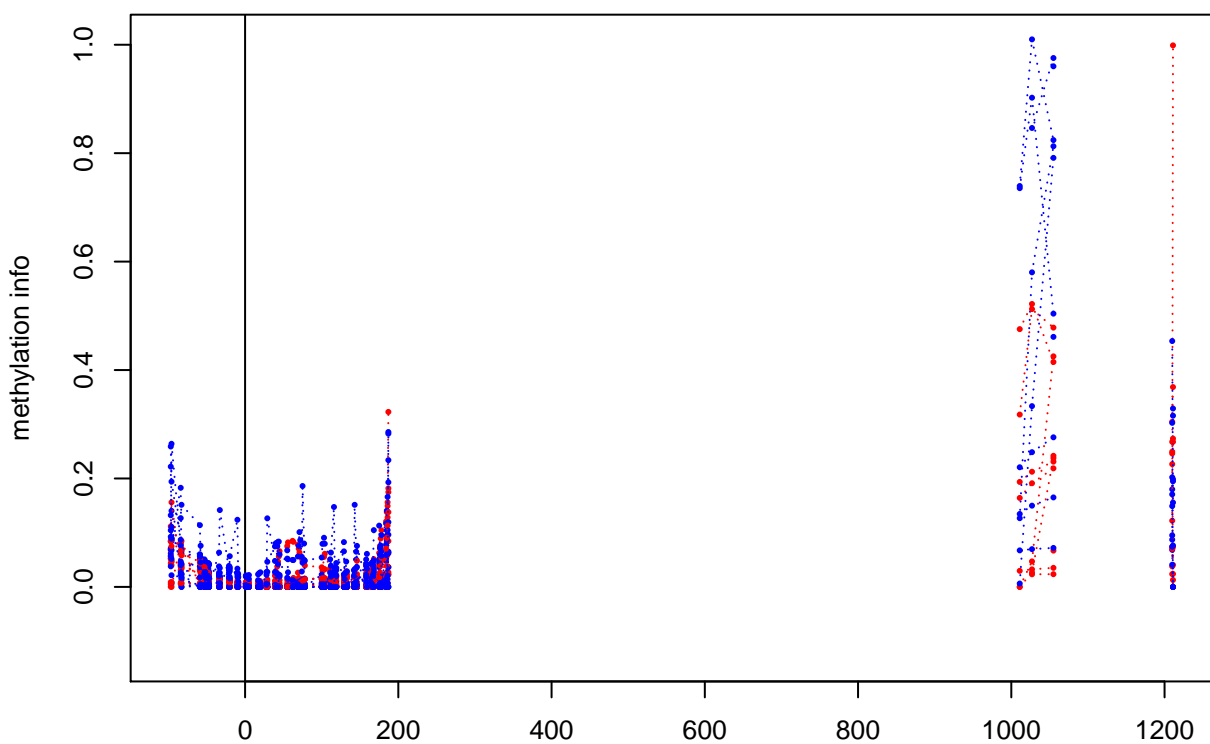

RNAseq logFC(UC-N)= 1.6

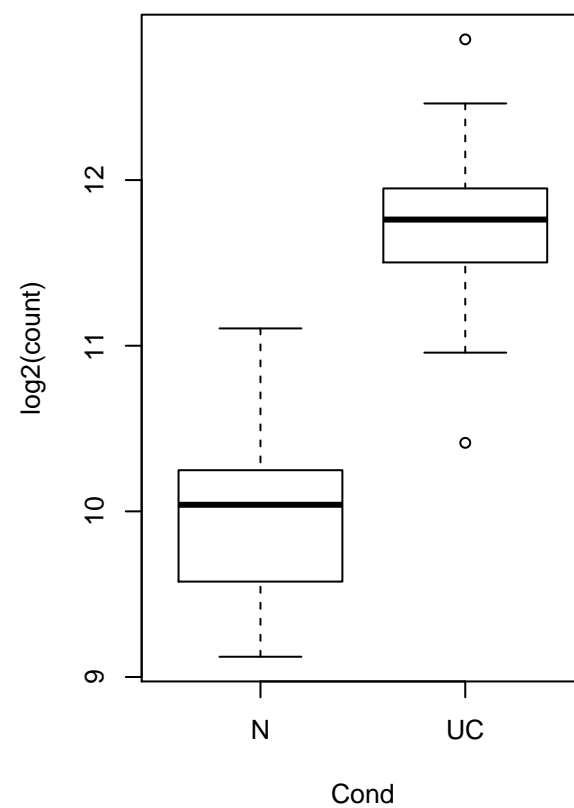

IL12RB2 average UC-N %methylation max=2.41% min=-15.51%

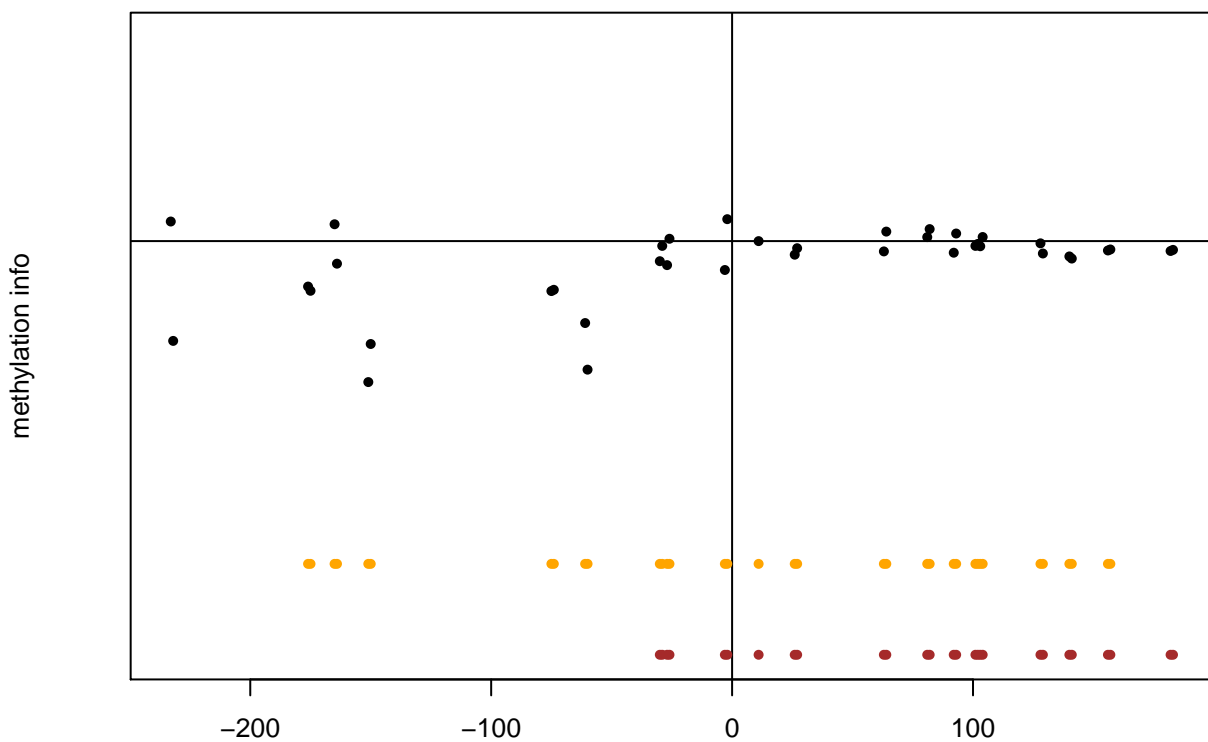

IL12RB2 raw %methylation, red=UC, blue=Normal

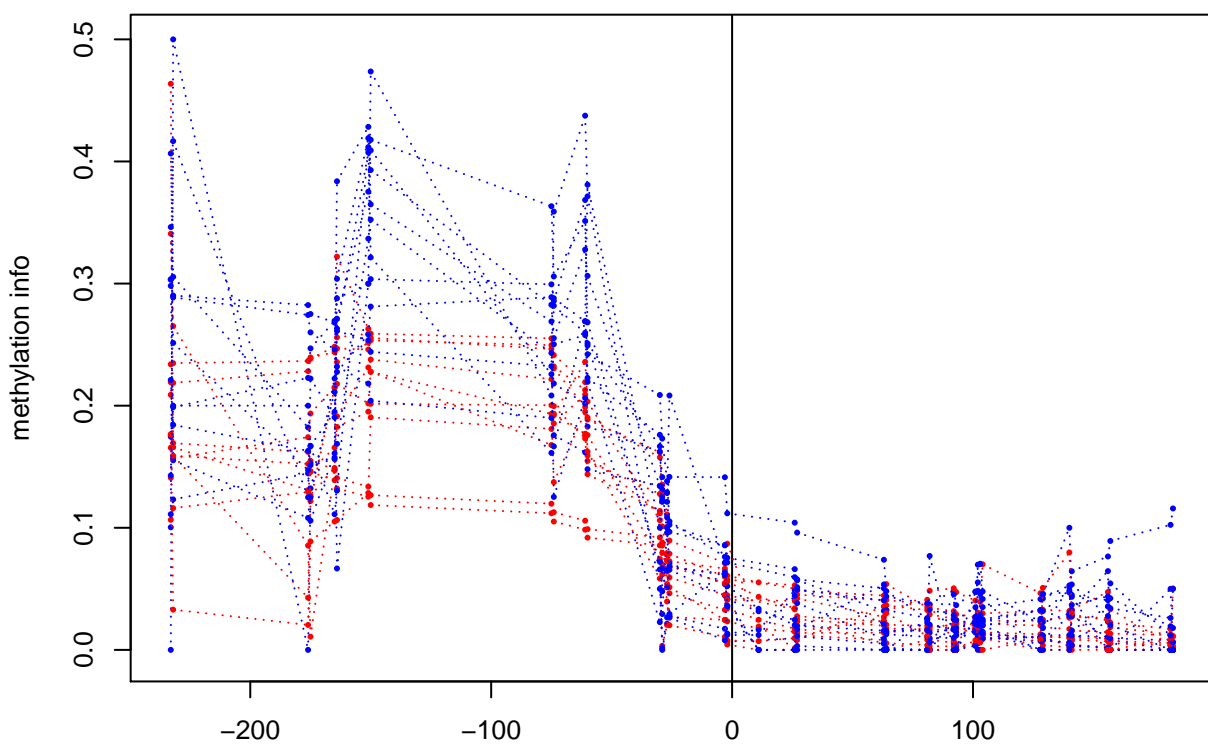

RNAseq logFC(UC-N)= 1.04

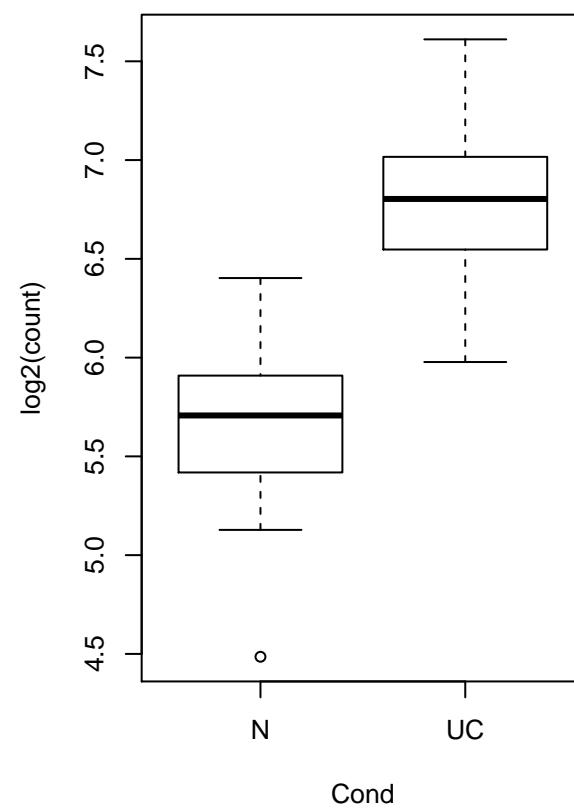

IL17A average UC-N %methylation max=-1.6% min=-21.64%

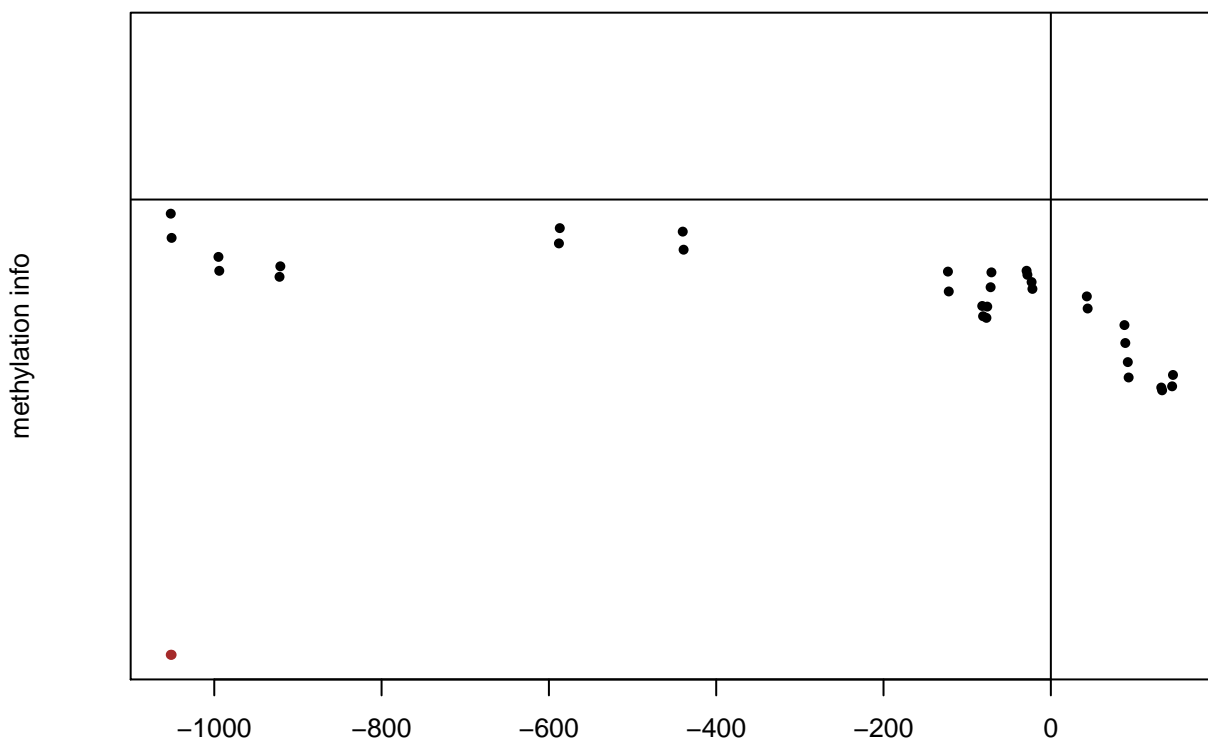

IL17A raw %methylation, red=UC, blue=Normal

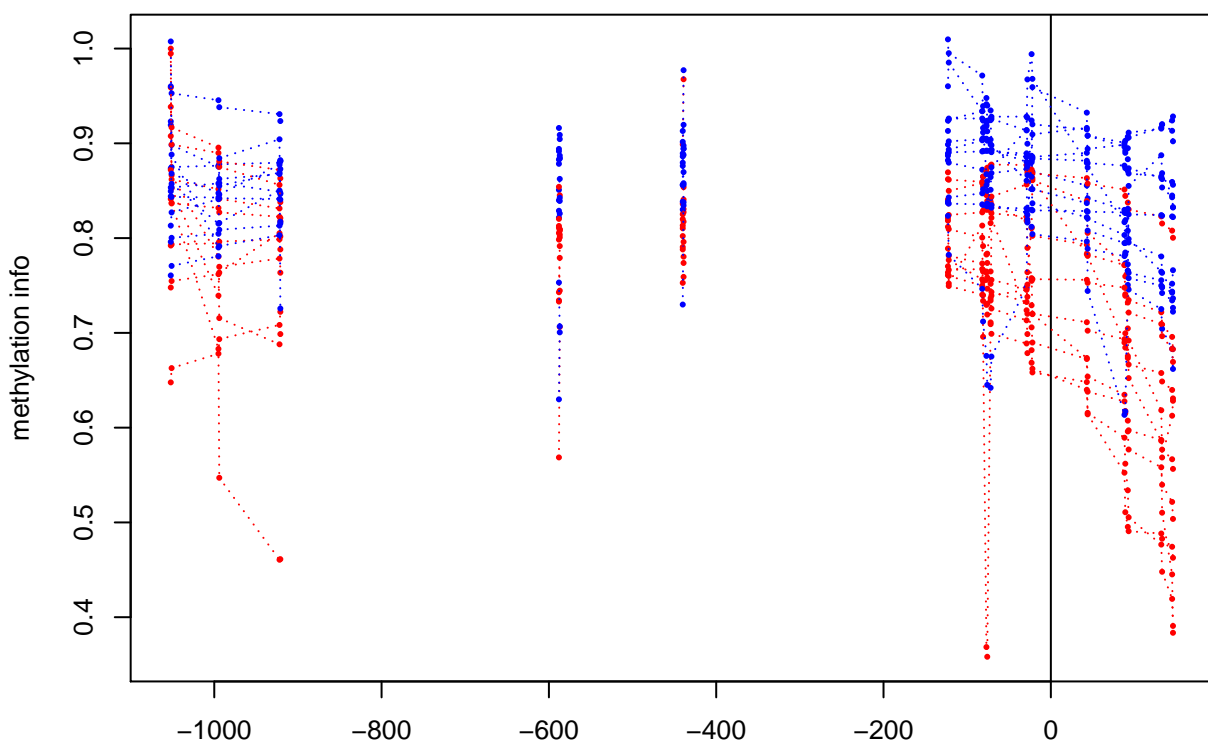

RNAseq logFC(UC-N)= 5.03

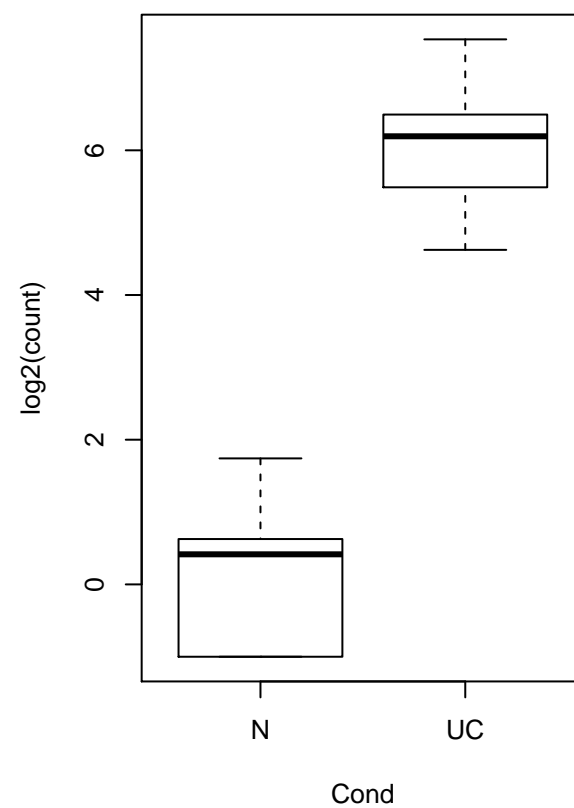

IL1B average UC-N %methylation max=-1.12% min=-29.44%

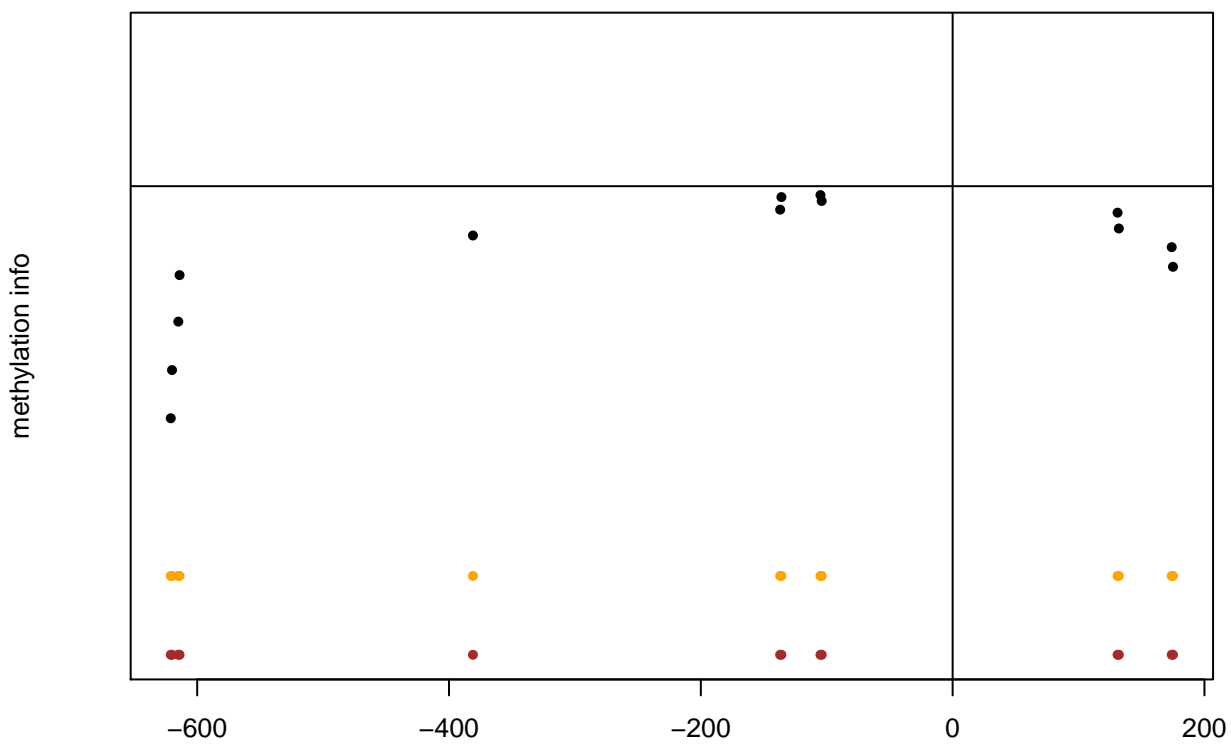

IL1B raw %methylation, red=UC, blue=Normal

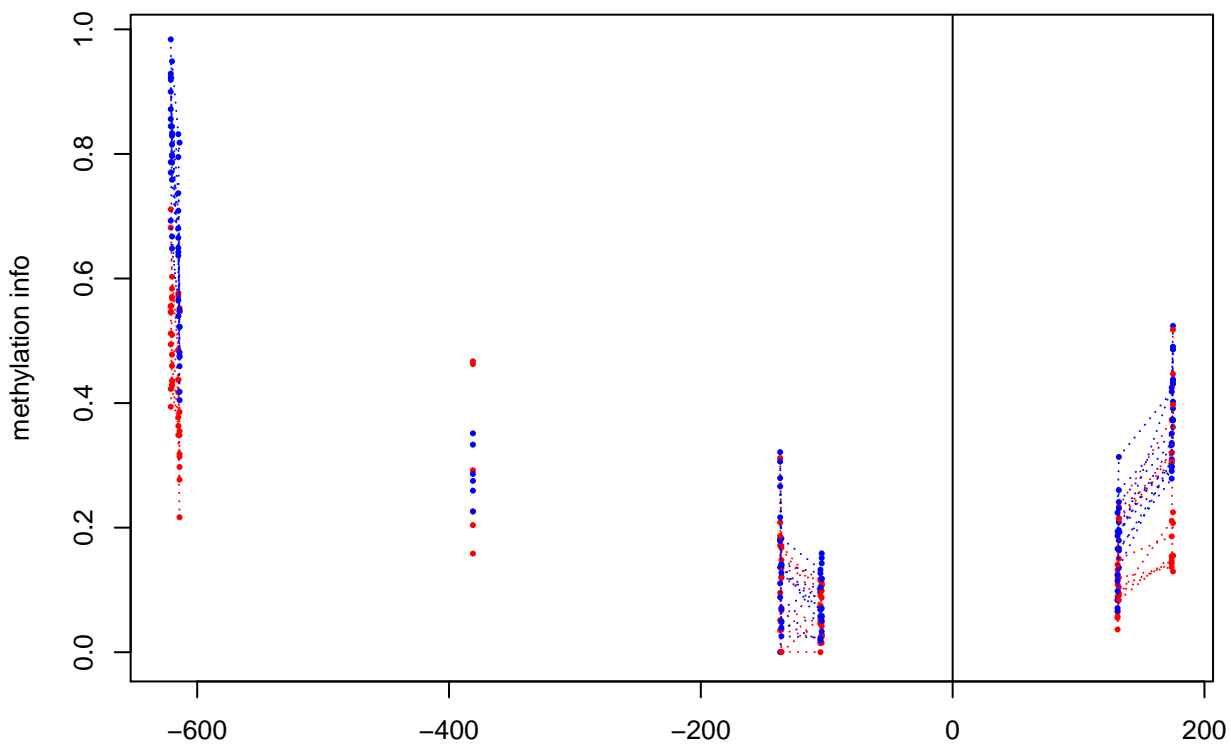

RNAseq logFC(UC-N)= 3.28

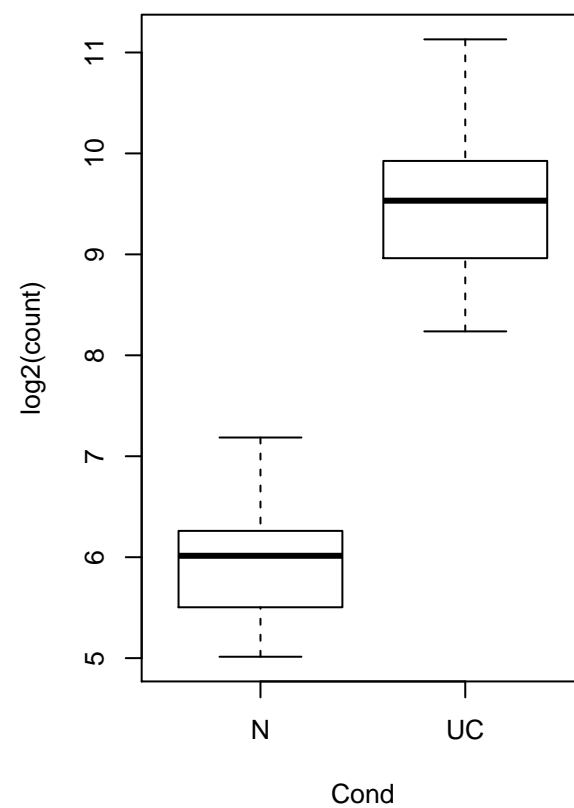



IL2RA average UC-N %methylation max=-34.25% min=-34.91%

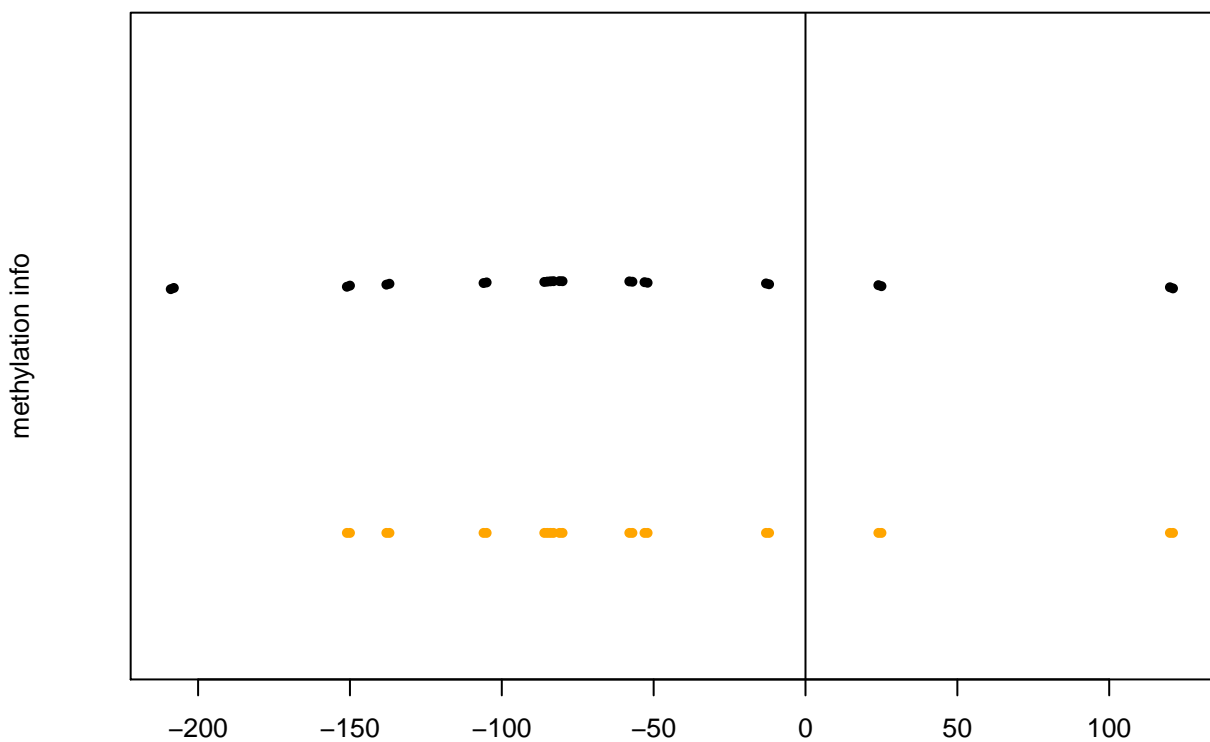

IL2RA raw %methylation, red=UC, blue=Normal

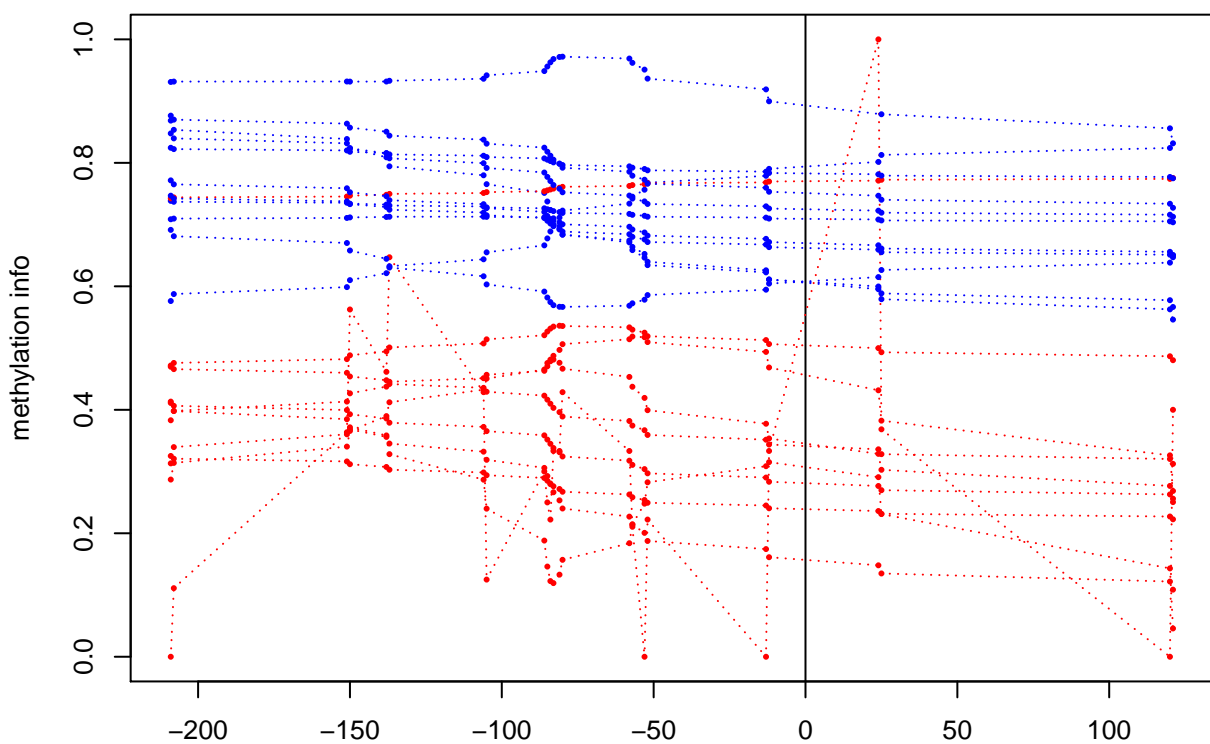

RNAseq logFC(UC-N)= 2.45

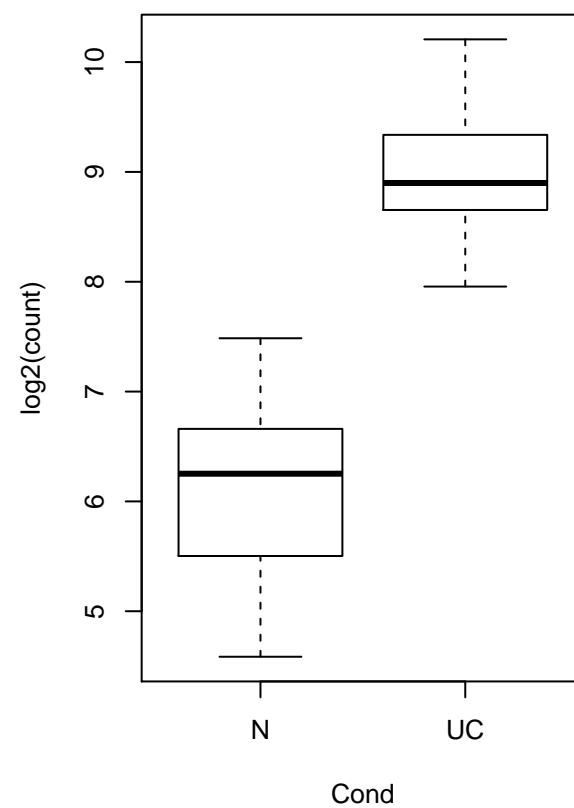

INPP5D average UC-N %methylation max=0.43% min=-37.9%

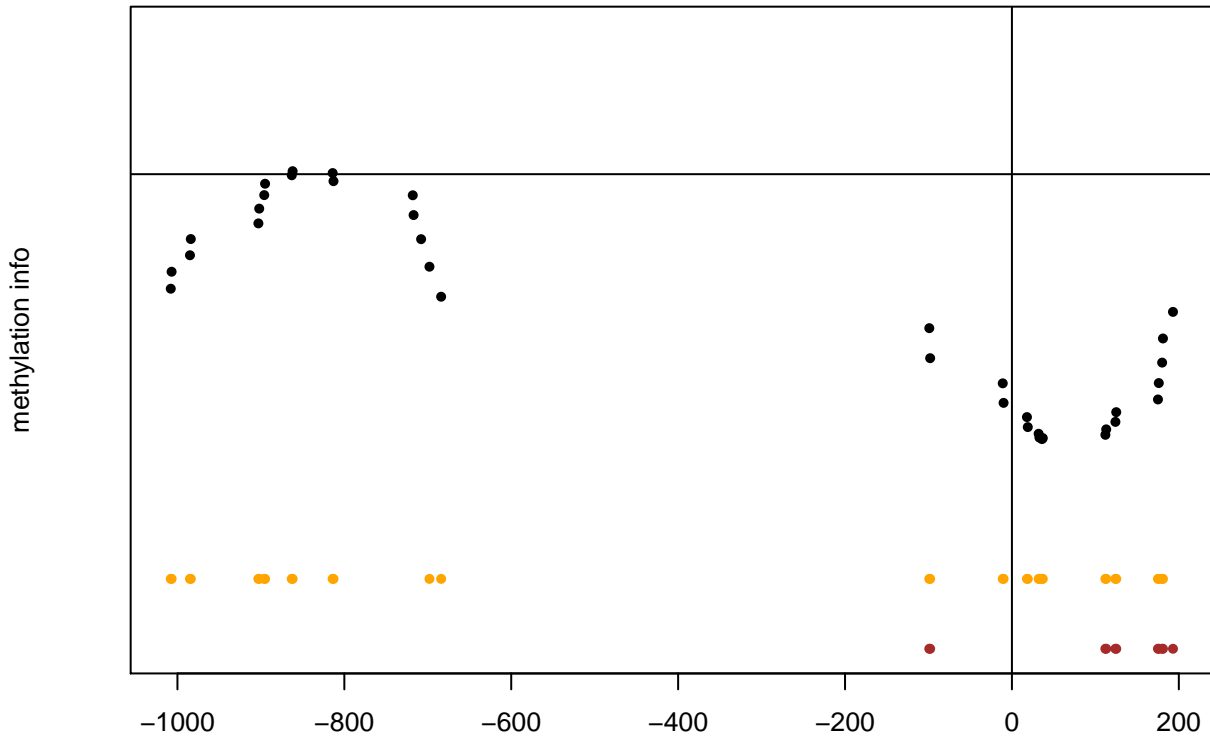

INPP5D raw %methylation, red=UC, blue=Normal

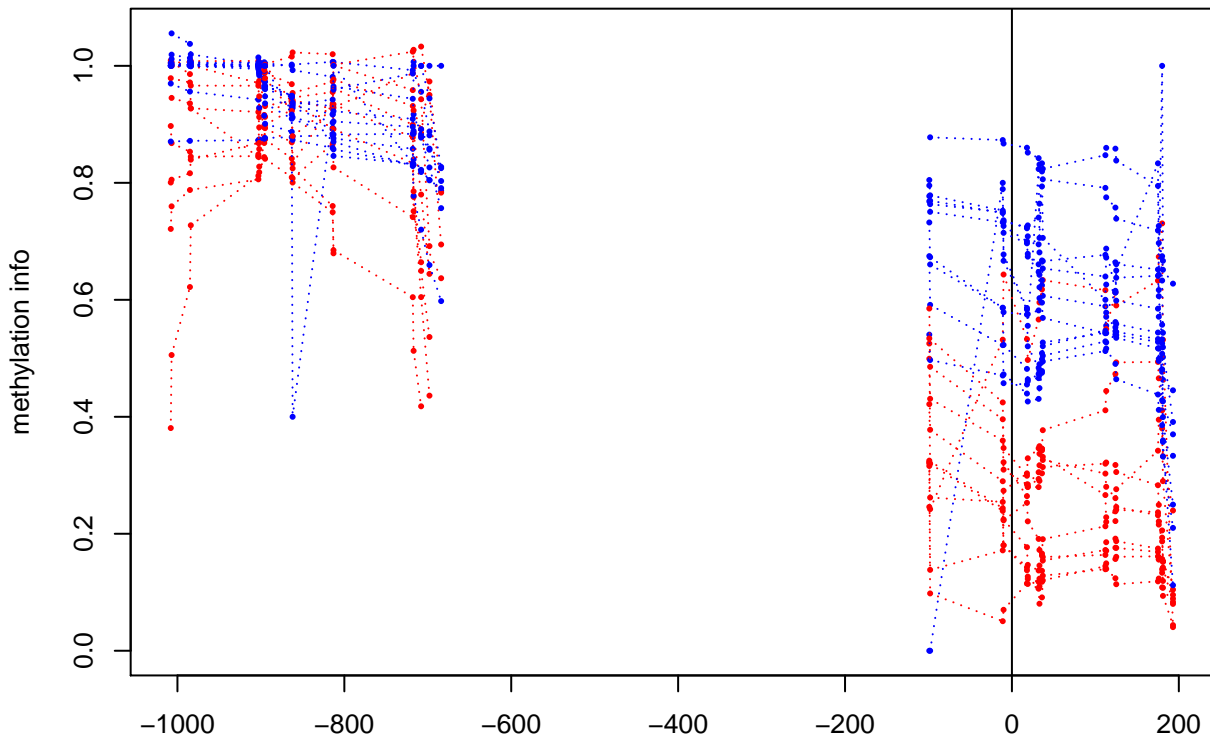

RNAseq logFC(UC-N)= 1.07

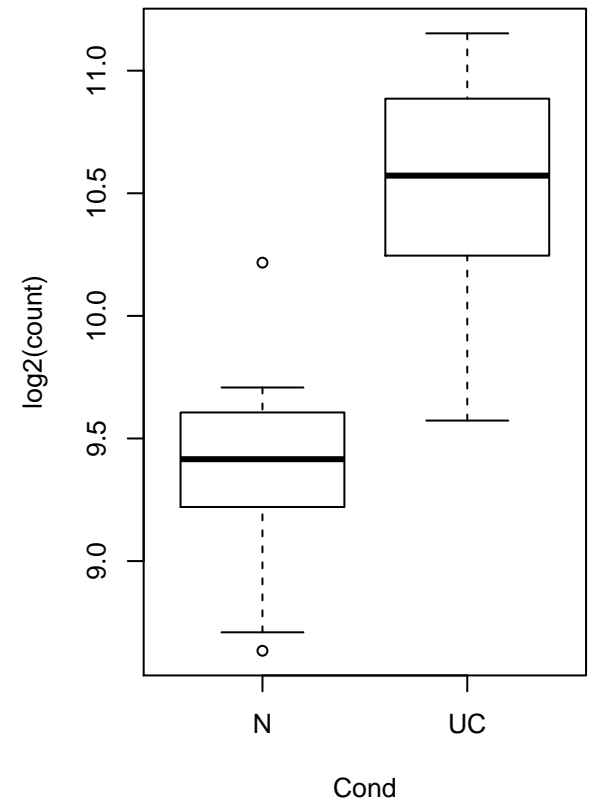

INPP5J average UC-N %methylation max=17.93% min=17.54%

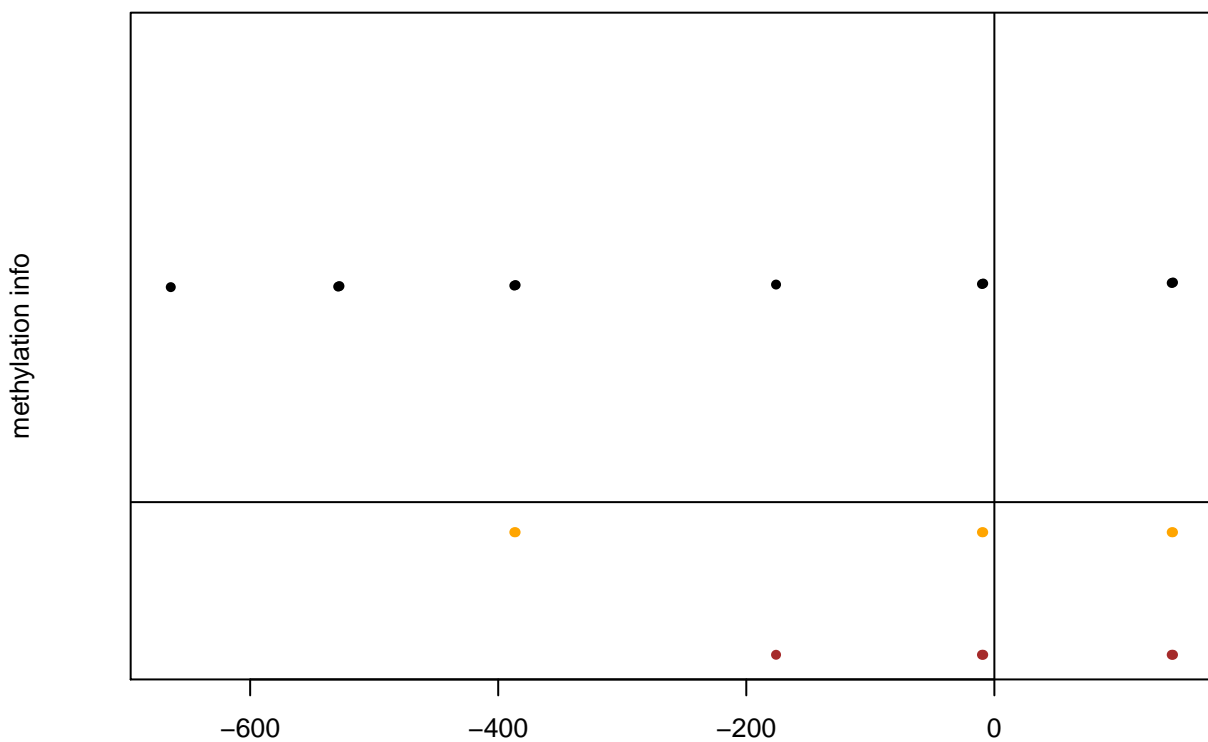

INPP5J raw %methylation, red=UC, blue=Normal

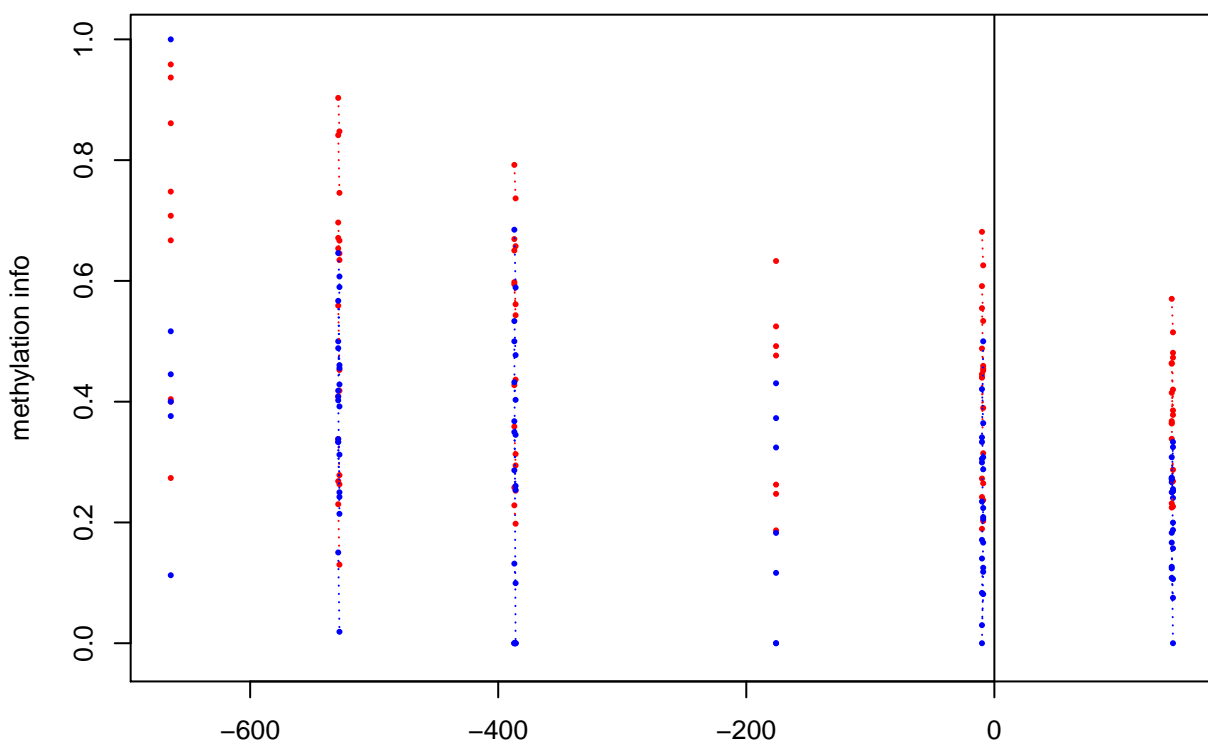

RNAseq logFC(UC-N) = -1.43

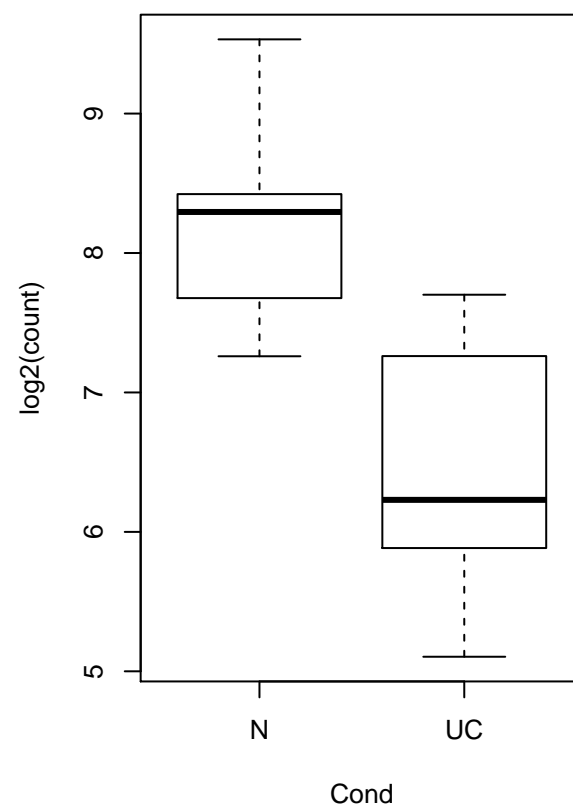

IRAK3 average UC-N %methylation max=1.79% min=-18.98%

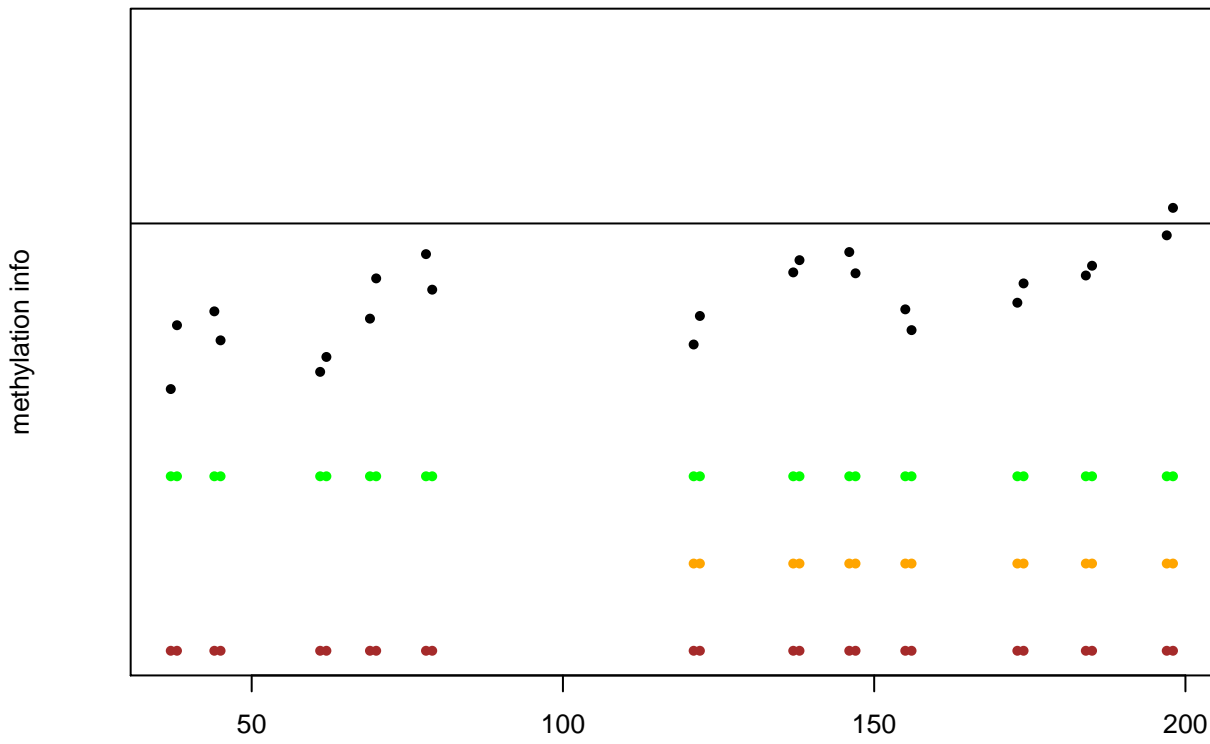

IRAK3 raw %methylation, red=UC, blue=Normal

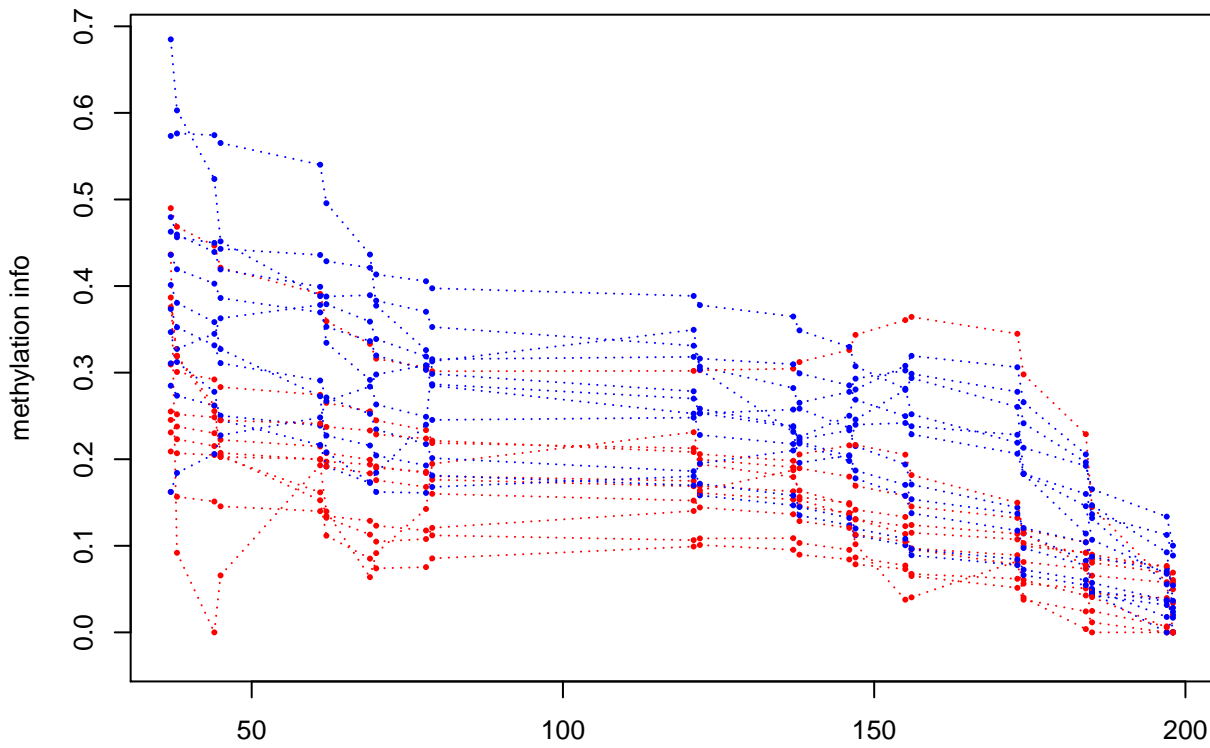

RNAseq logFC(UC-N)= 1.07

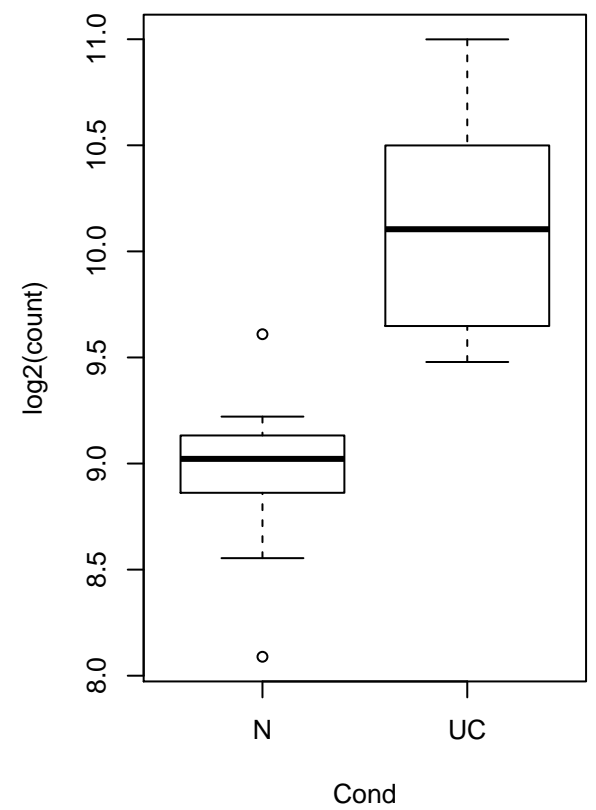

ISG20 average UC-N %methylation max=-27.35% min=-30.51%

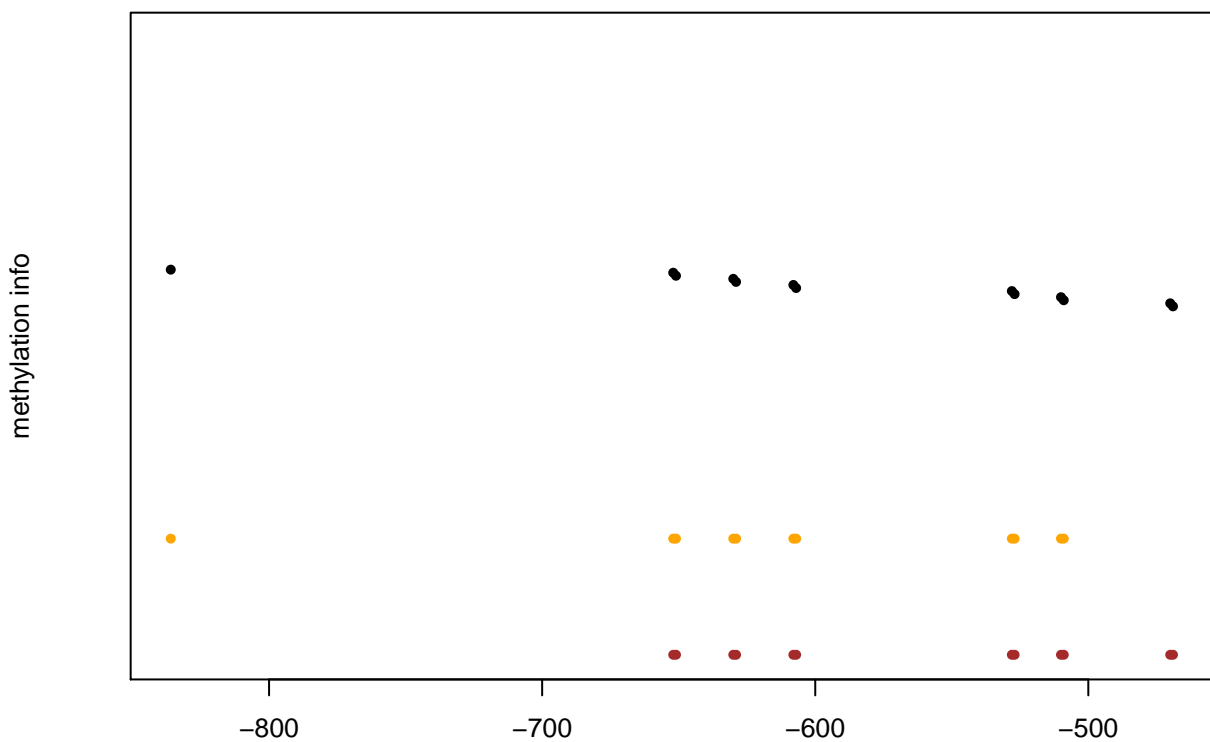

ISG20 raw %methylation, red=UC, blue=Normal

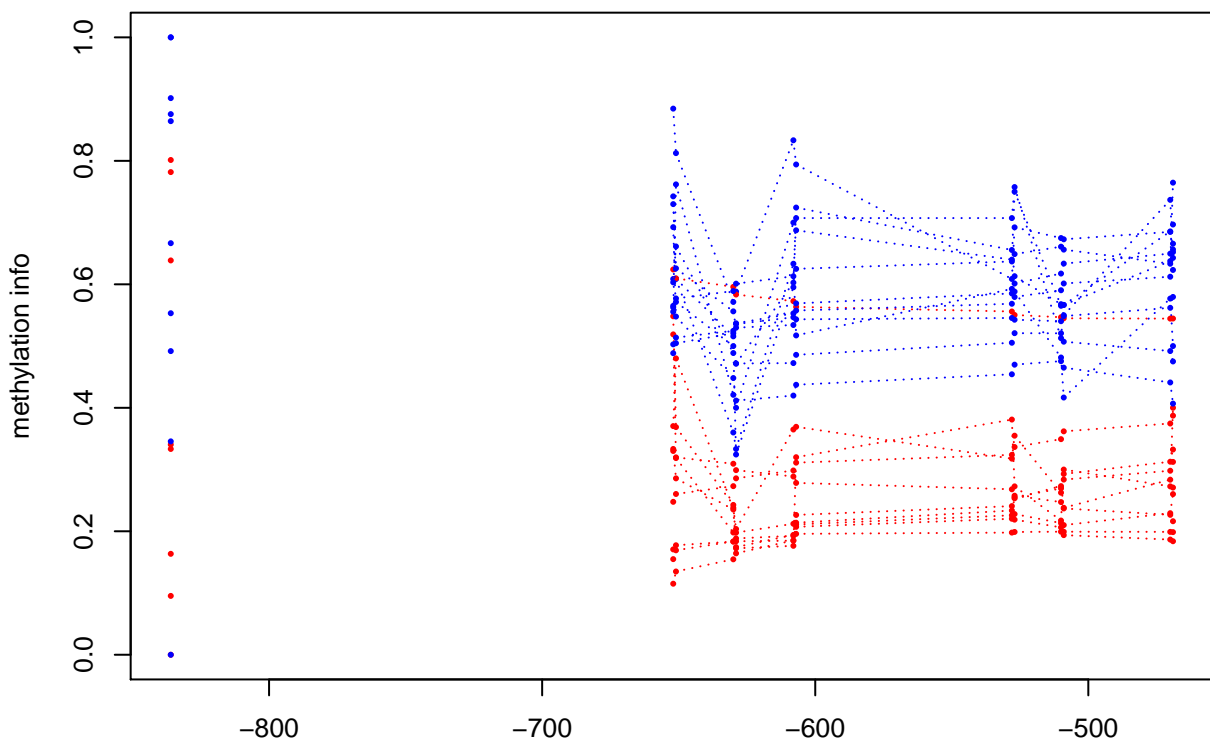

RNAseq logFC(UC-N)= 1.49

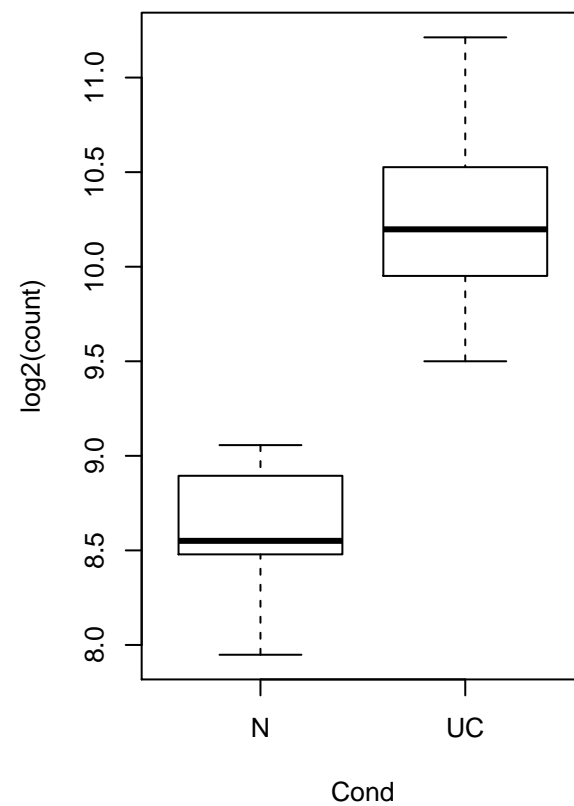

ITGAL average UC-N %methylation max=2.54% min=-30.8%

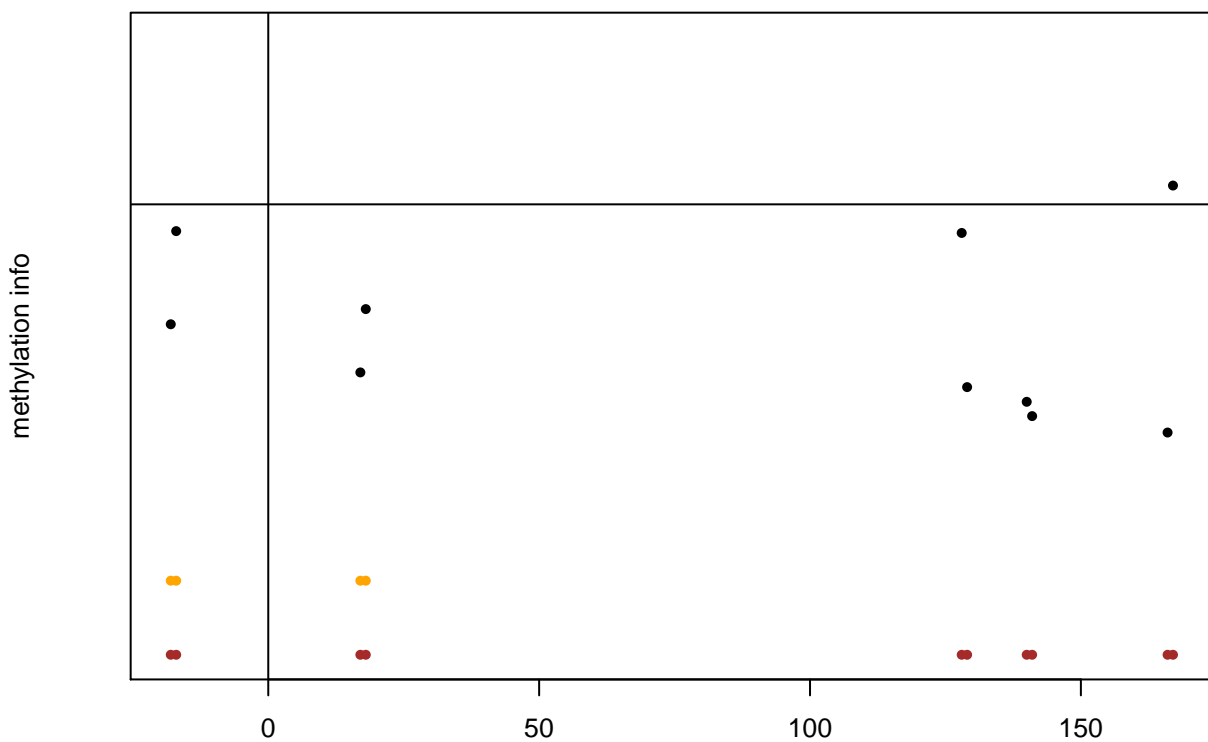

ITGAL raw %methylation, red=UC, blue=Normal

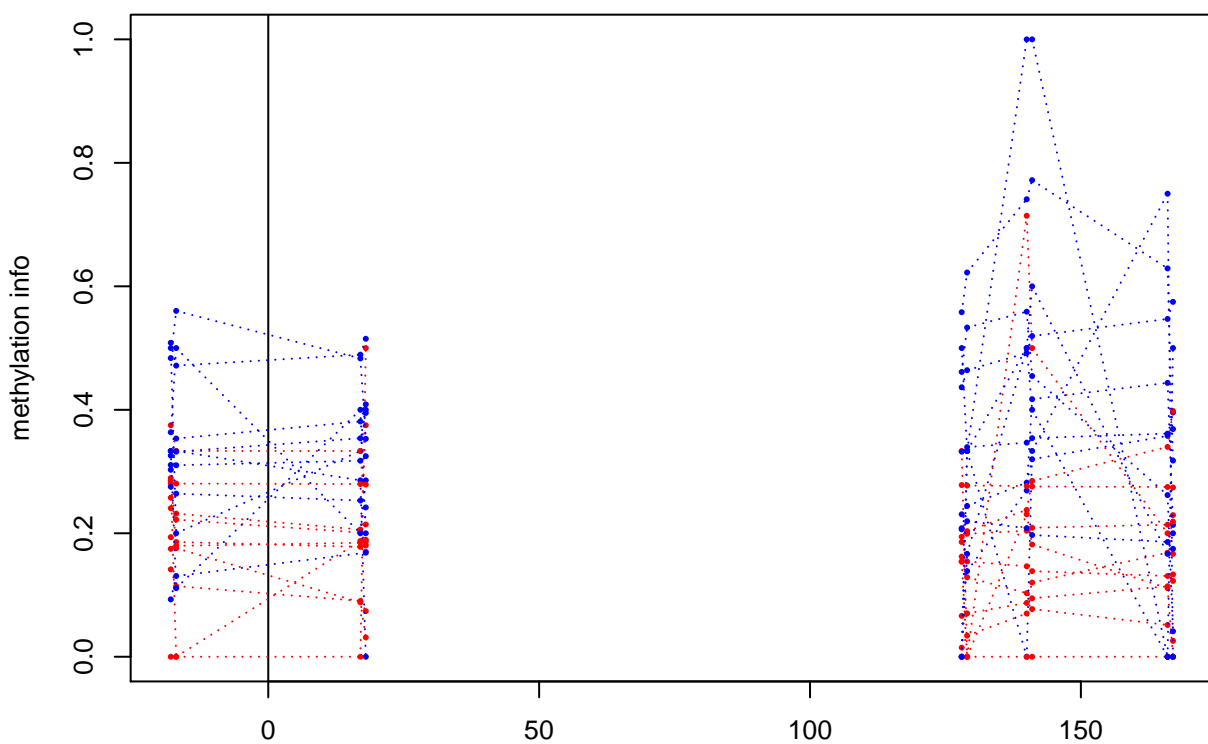

RNAseq logFC(UC-N)= 1.29

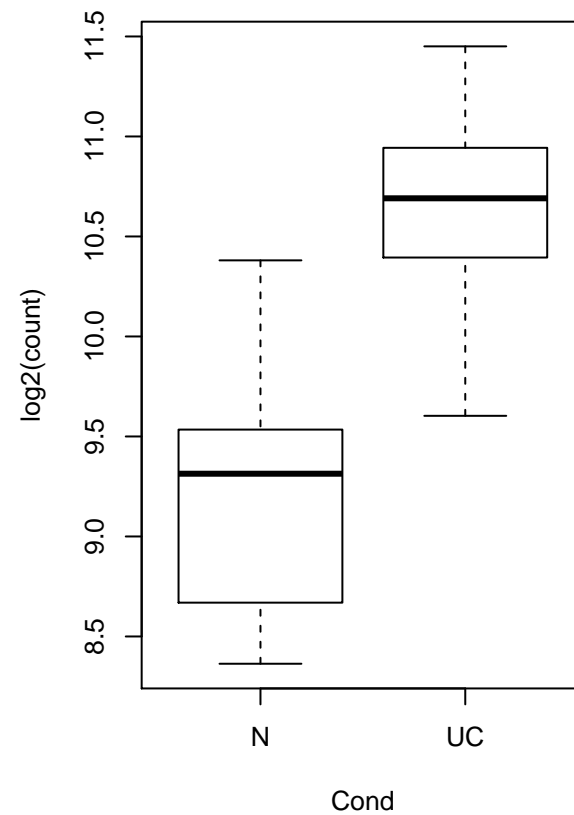

ITGAX average UC-N %methylation max=-1.11% min=-22.43%

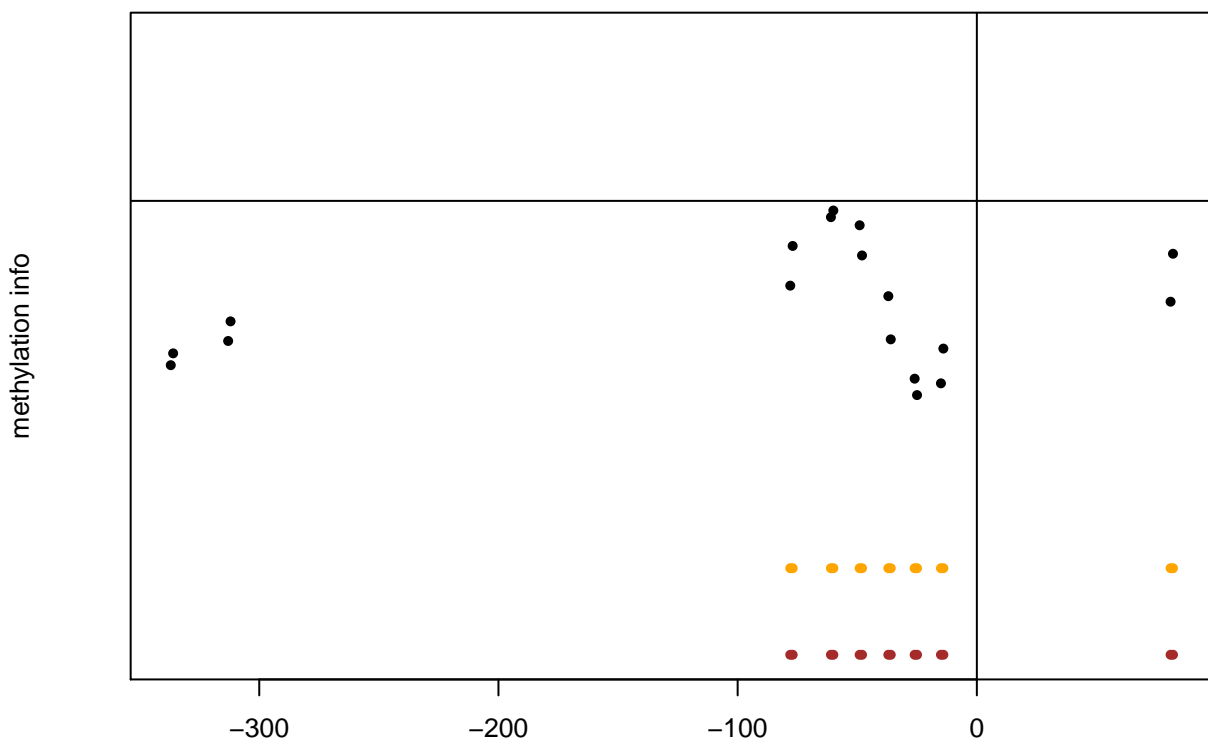

ITGAX raw %methylation, red=UC, blue=Normal

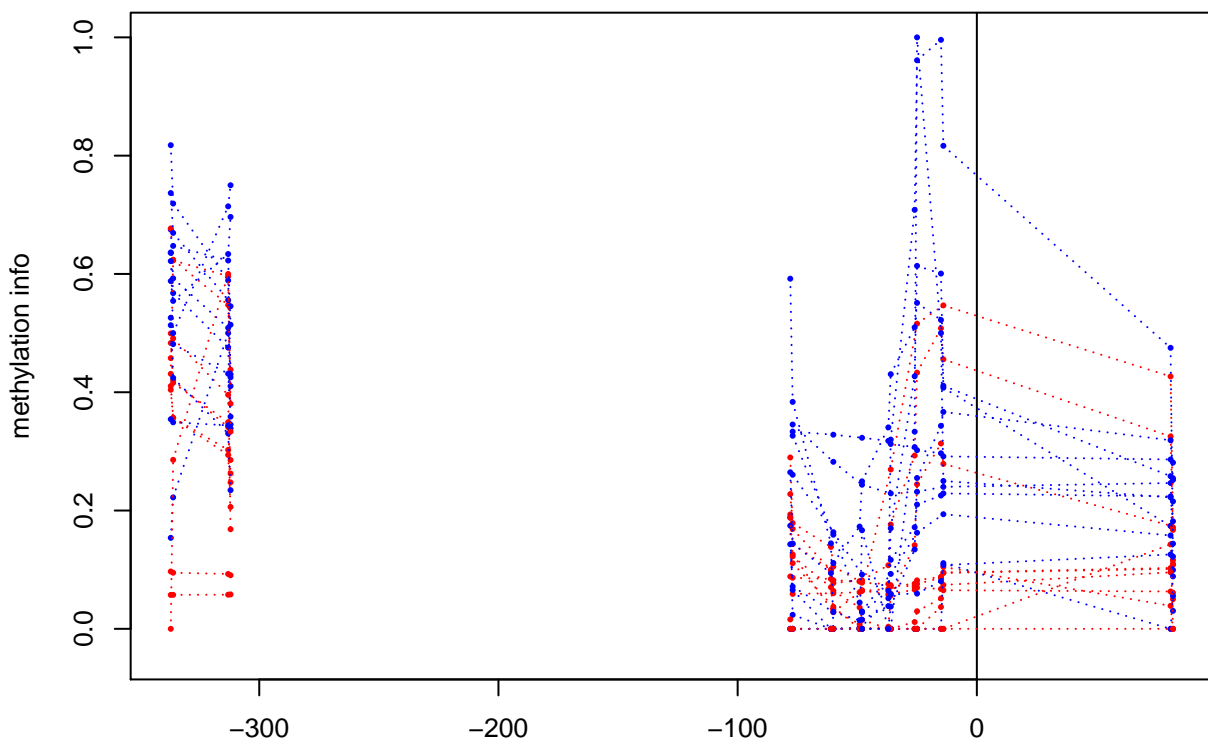

RNAseq logFC(UC-N)= 2.13

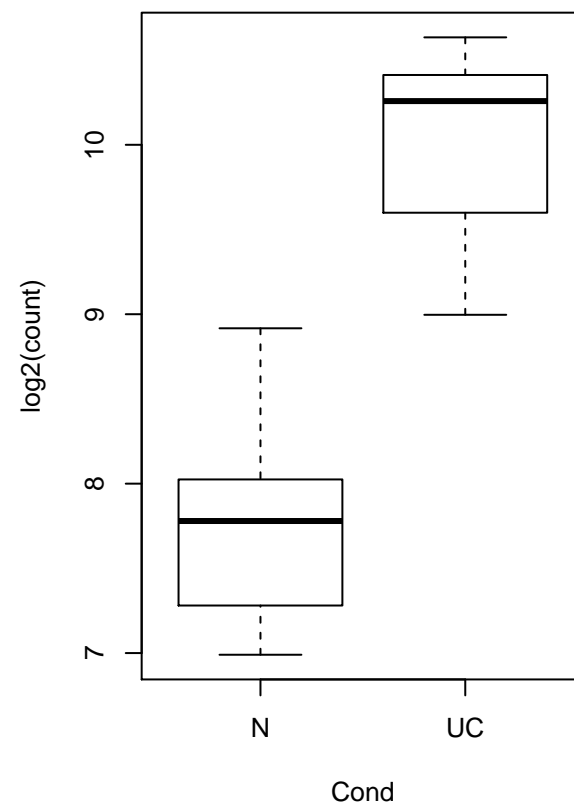

ITGB2-AS1 average UC-N %methylation max=-0.93% min=-43.72%

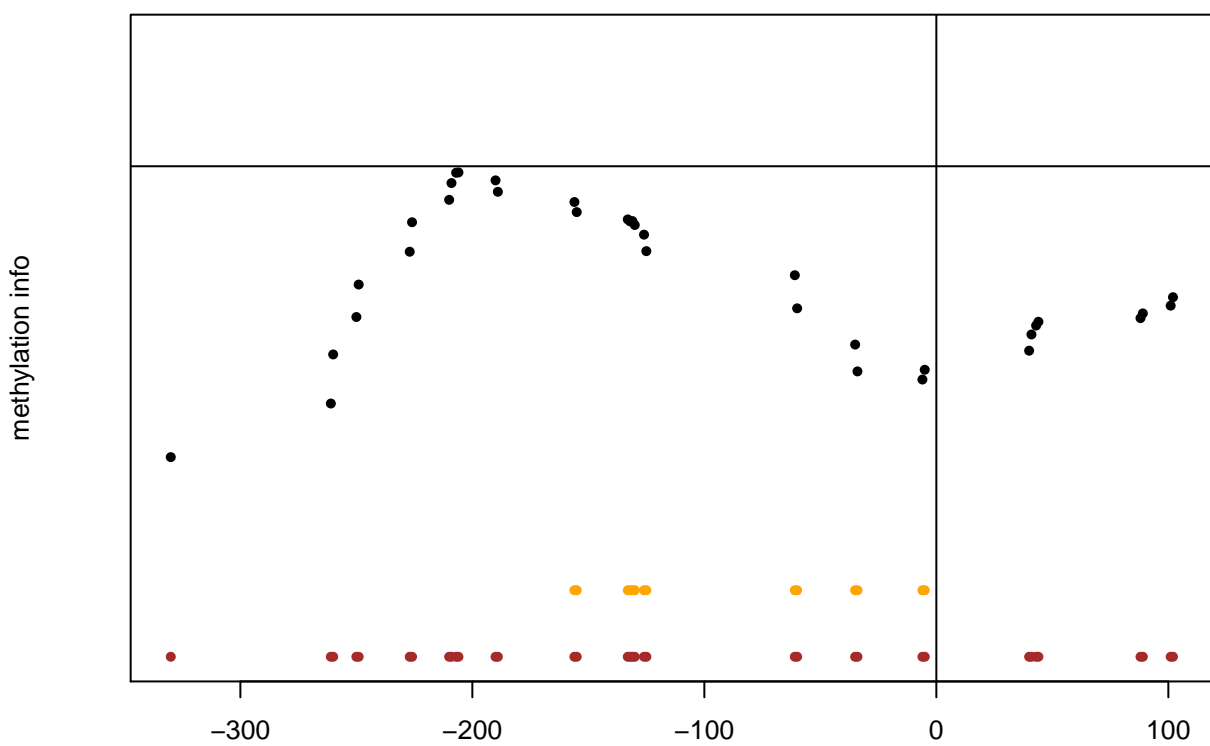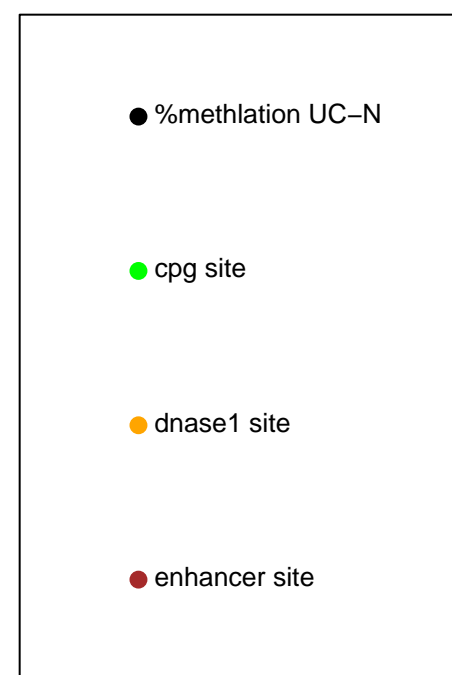

ITGB2-AS1 raw %methylation, red=UC, blue=Normal

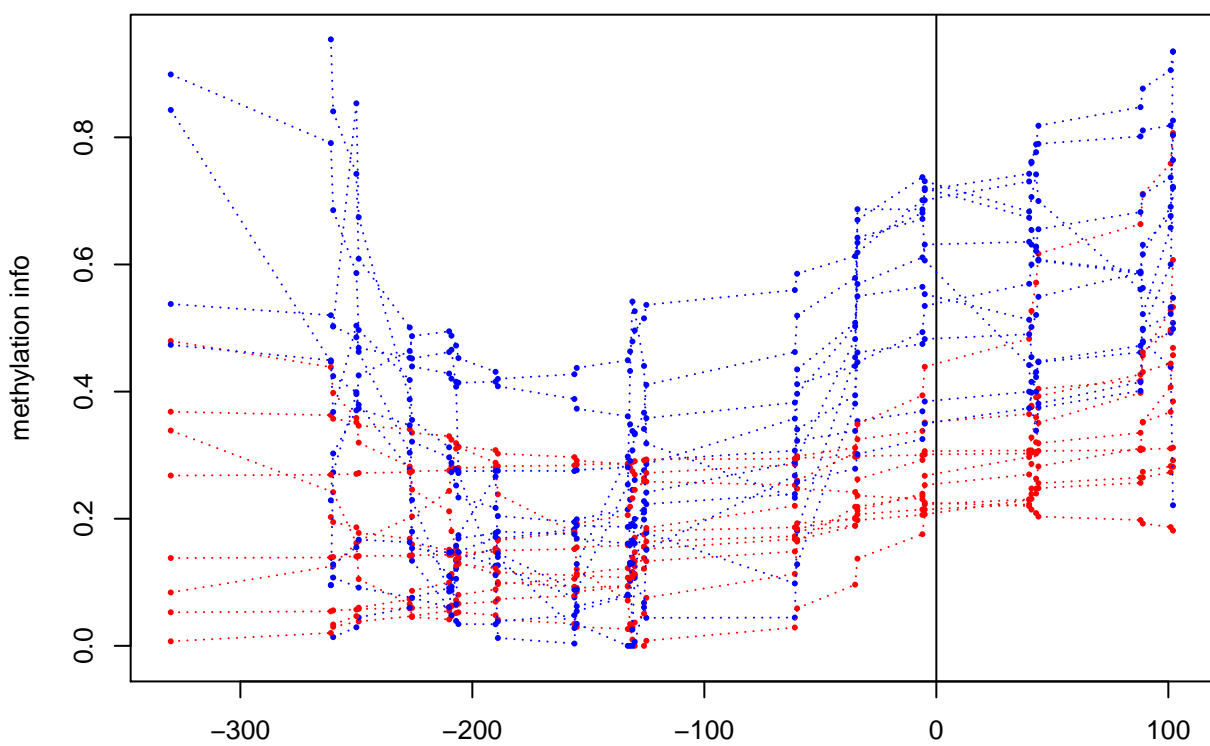

RNAseq logFC(UC-N)= 1.79

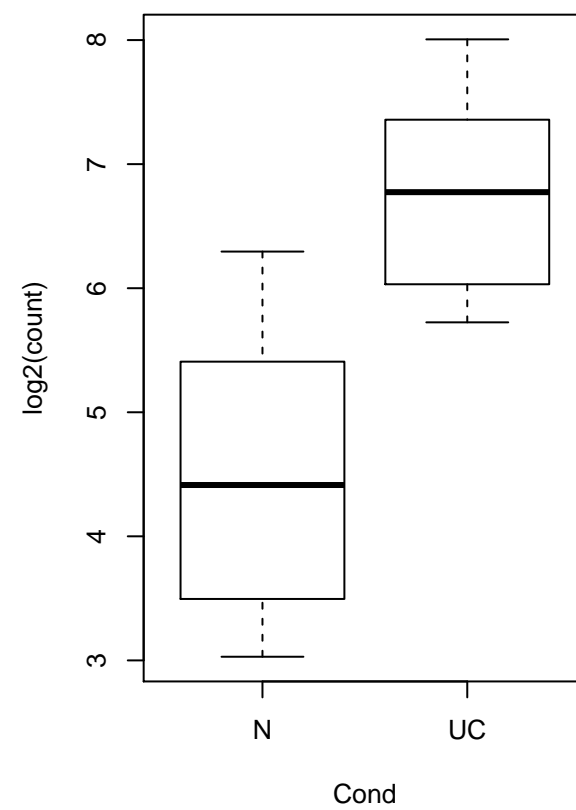



ITGB2 average UC-N %methylation max=-8.5% min=-36.49%

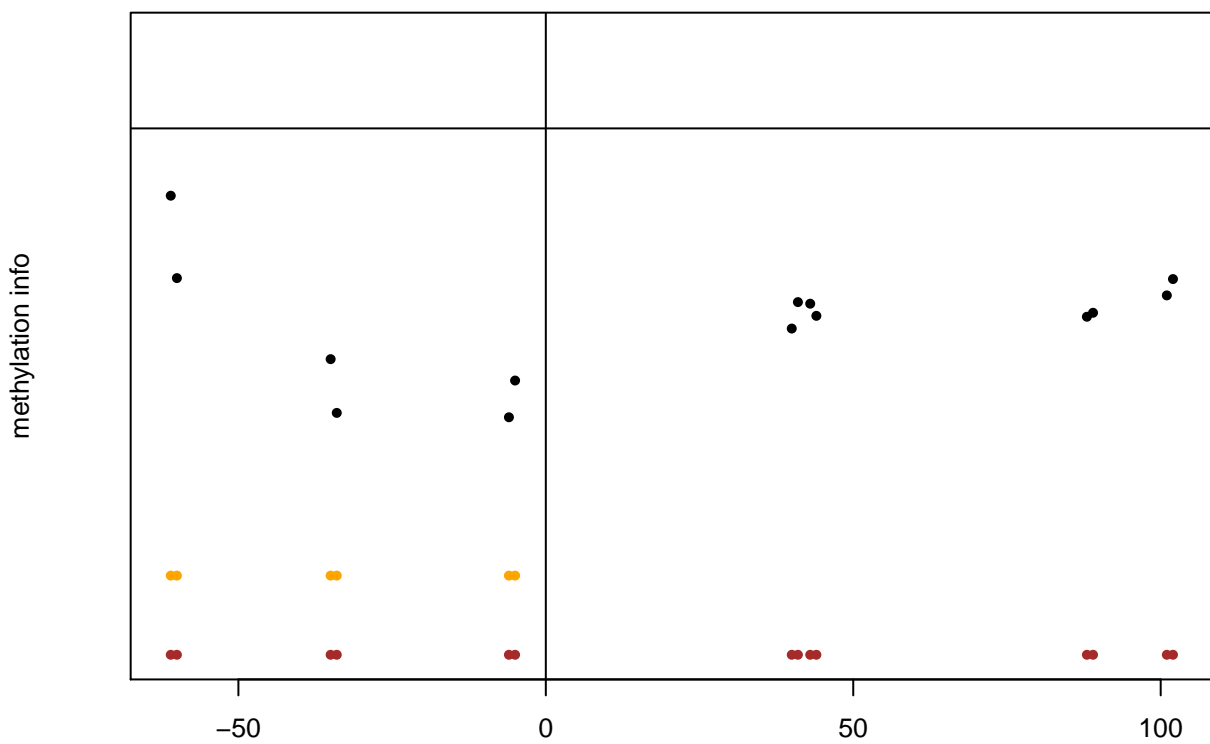

ITGB2 raw %methylation, red=UC, blue=Normal

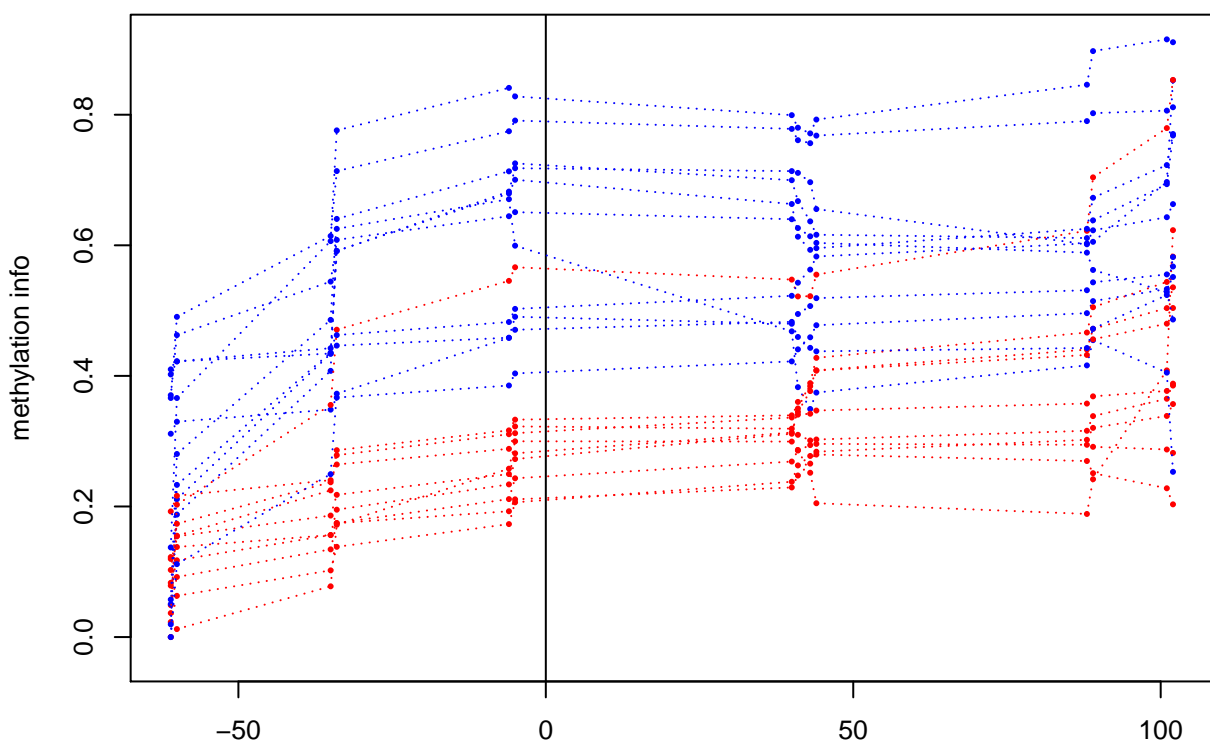

RNAseq logFC(UC-N)= 1.23

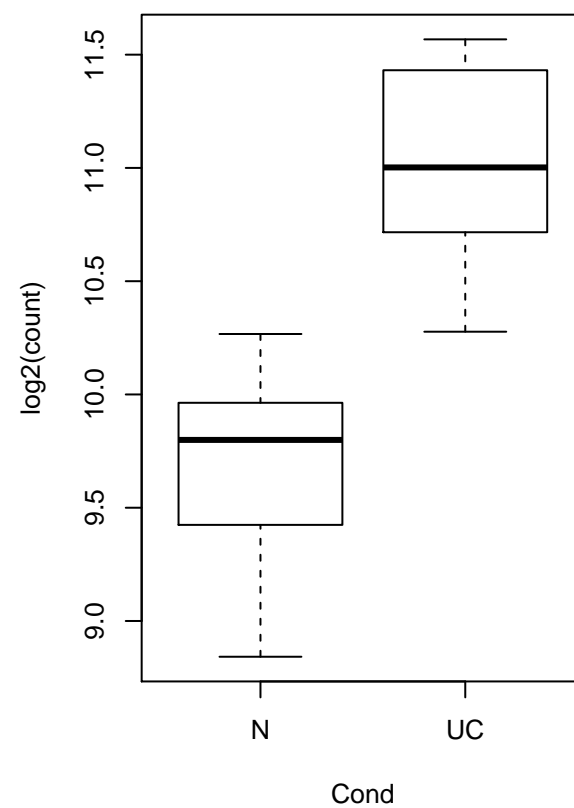

ITPRIPL1 average UC-N %methylation max=1.43% min=-18.37%

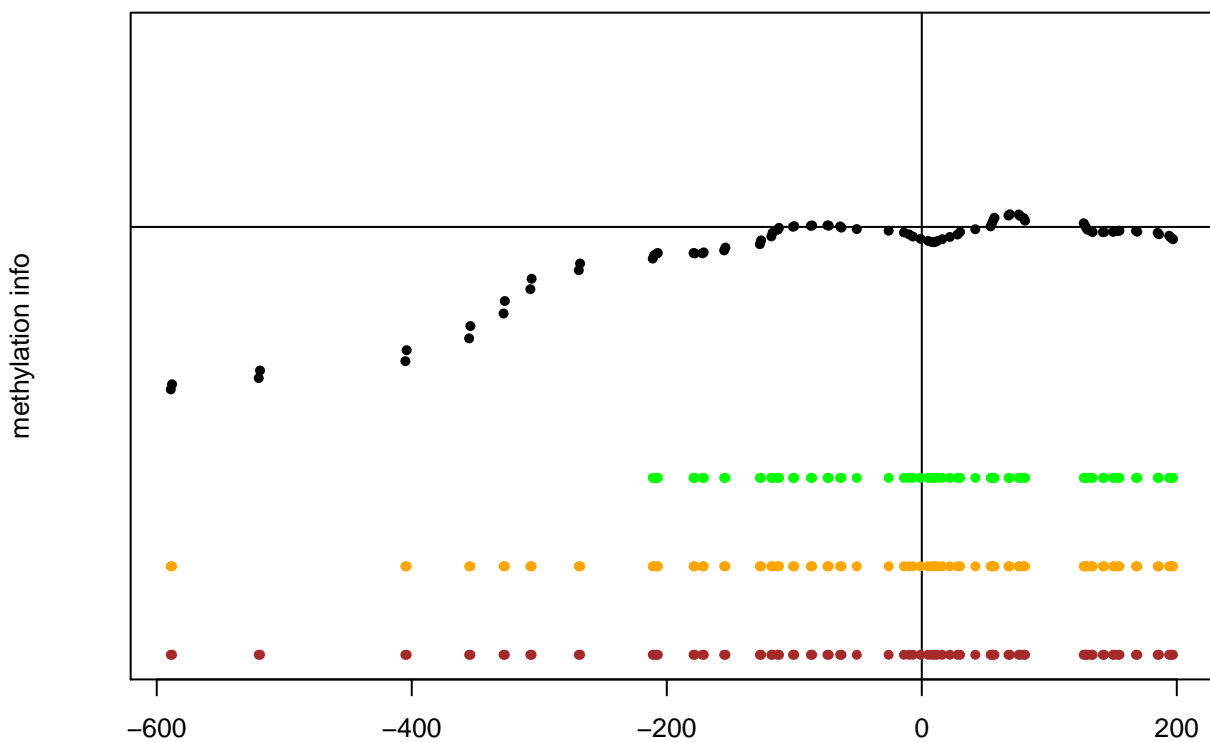

ITPRIPL1 raw %methylation, red=UC, blue=Normal

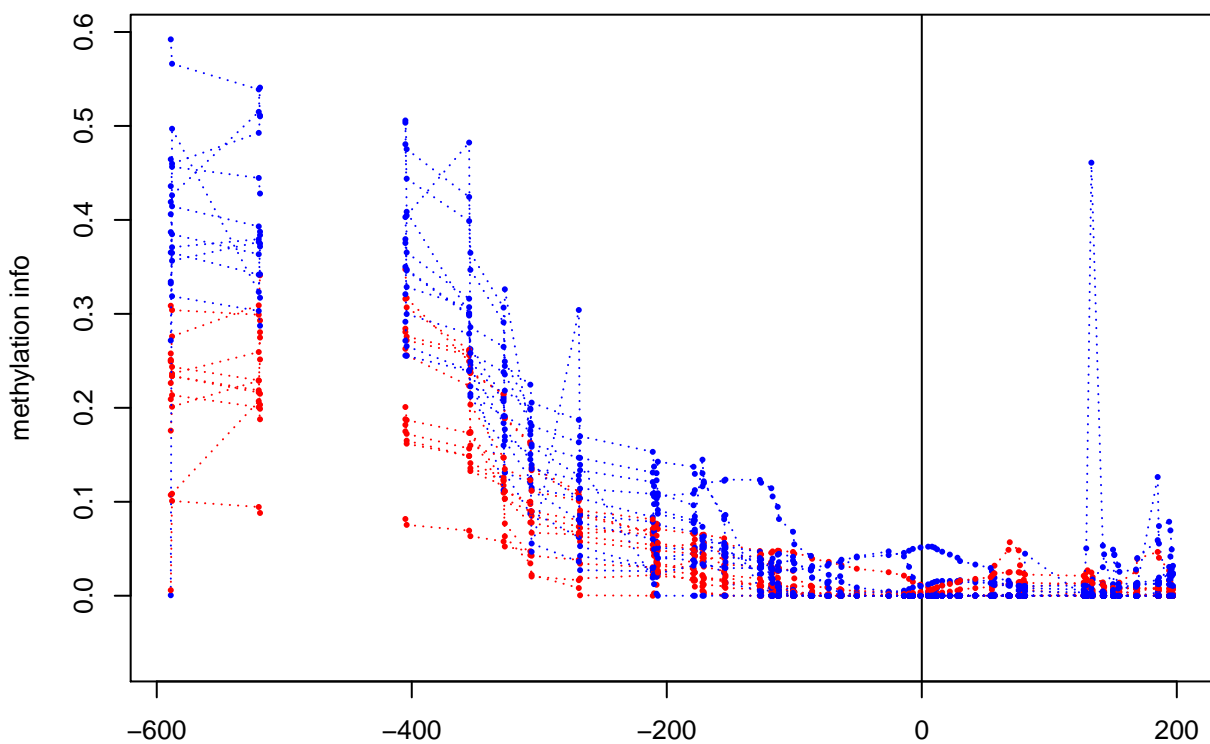

RNAseq logFC(UC-N)= 1.17

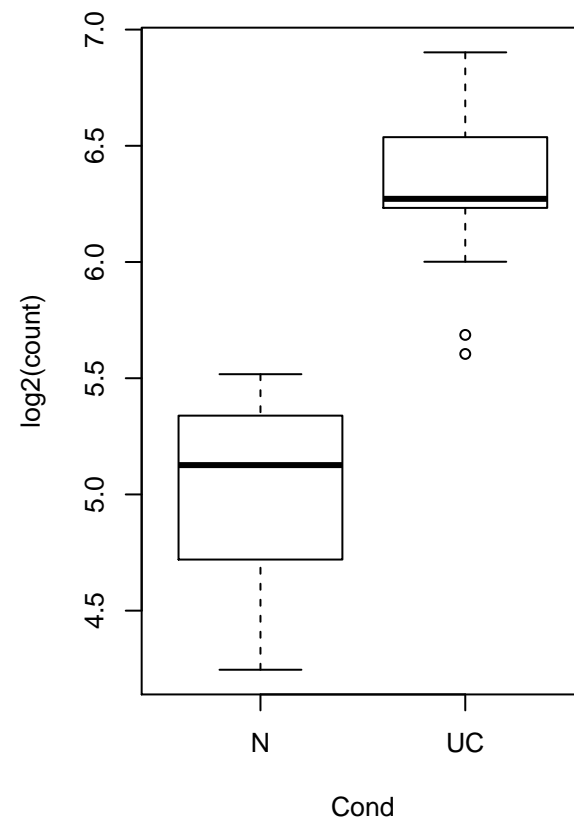

IYD average UC-N %methylation max=12.88% min=12.74%

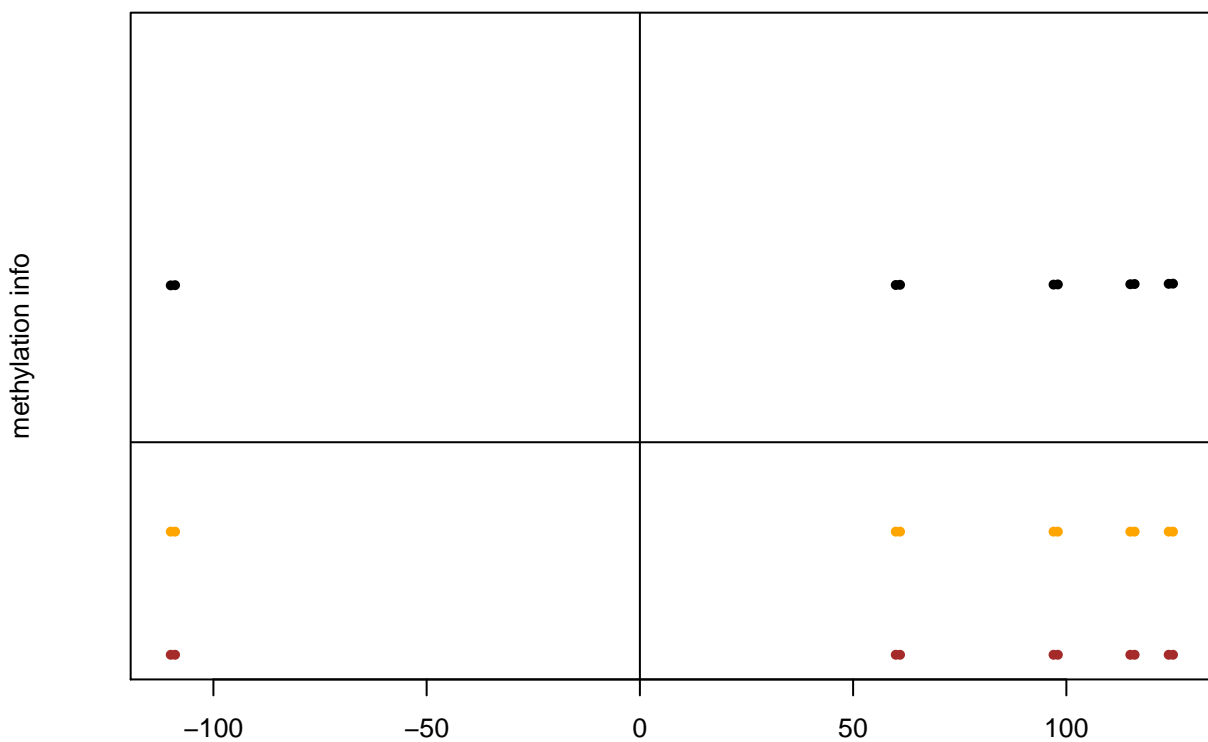

IYD raw %methylation, red=UC, blue=Normal

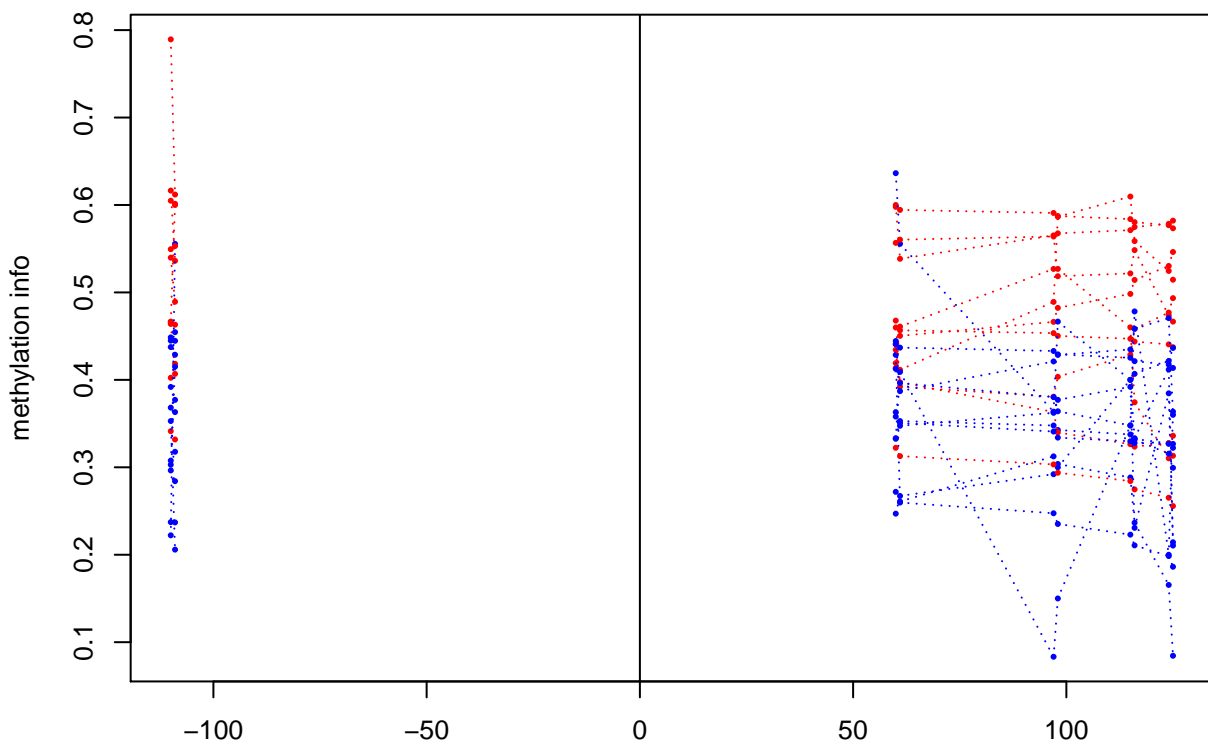

RNAseq logFC(UC-N) = -1.02

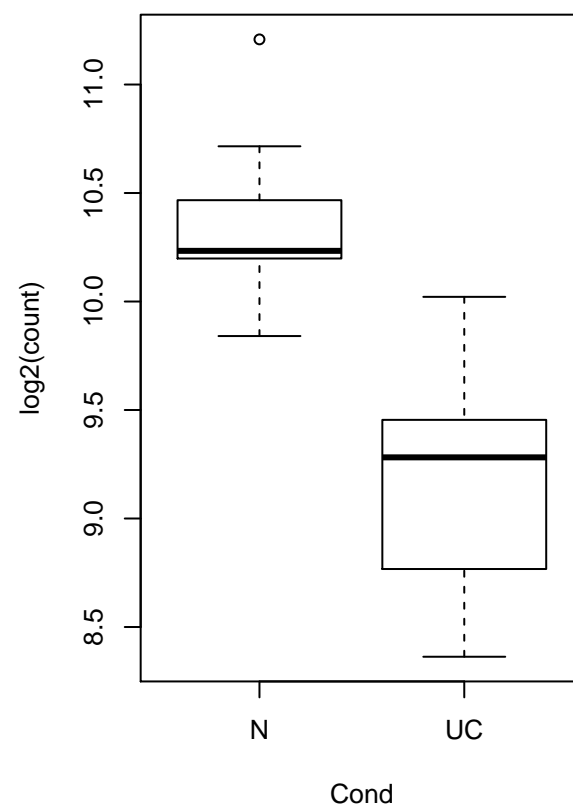

JAK3 average UC-N %methylation max=-12.18% min=-37.54%

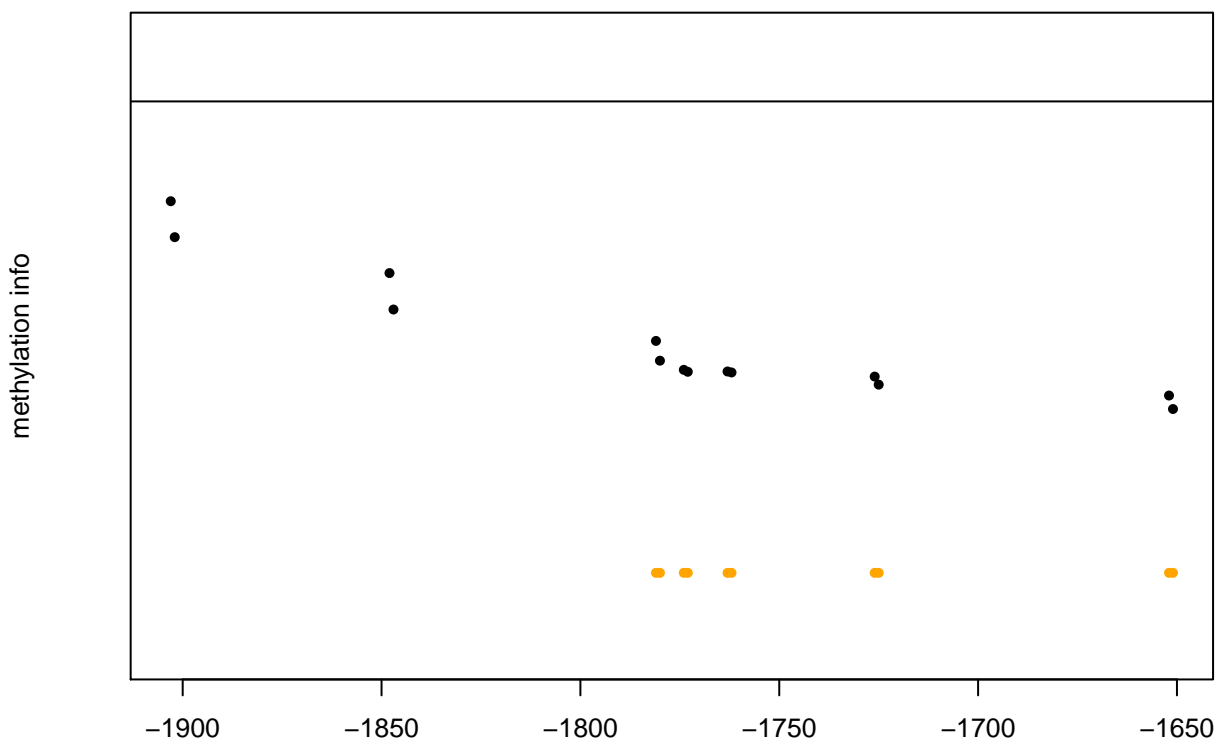

JAK3 raw %methylation, red=UC, blue=Normal

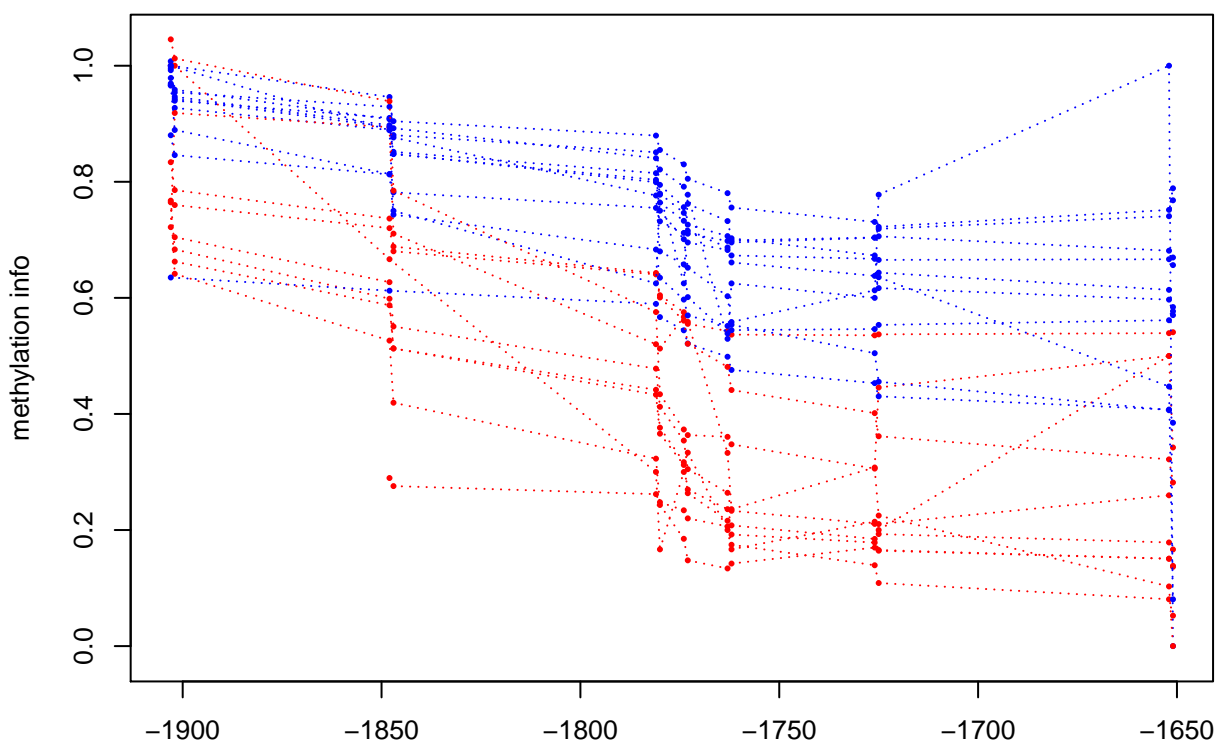

RNAseq logFC(UC-N)= 2.29

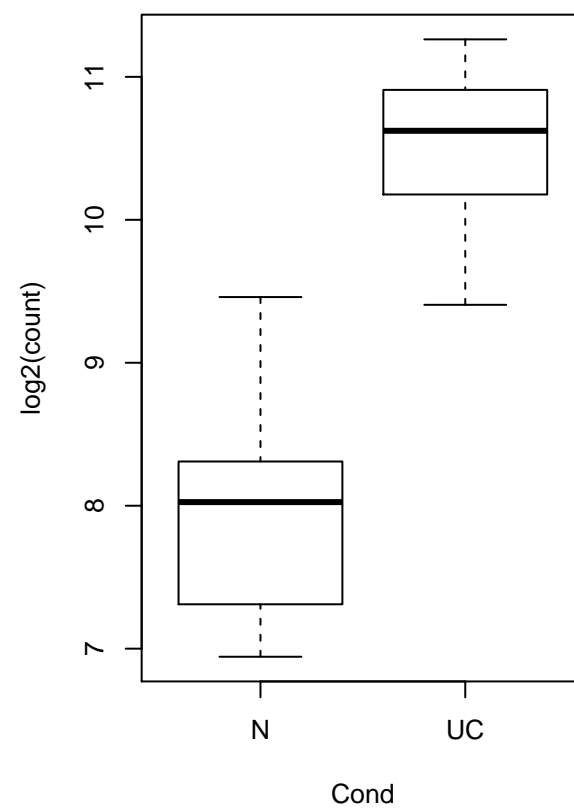

KLHL14 average UC-N %methylation max=-6.37% min=-32.64%

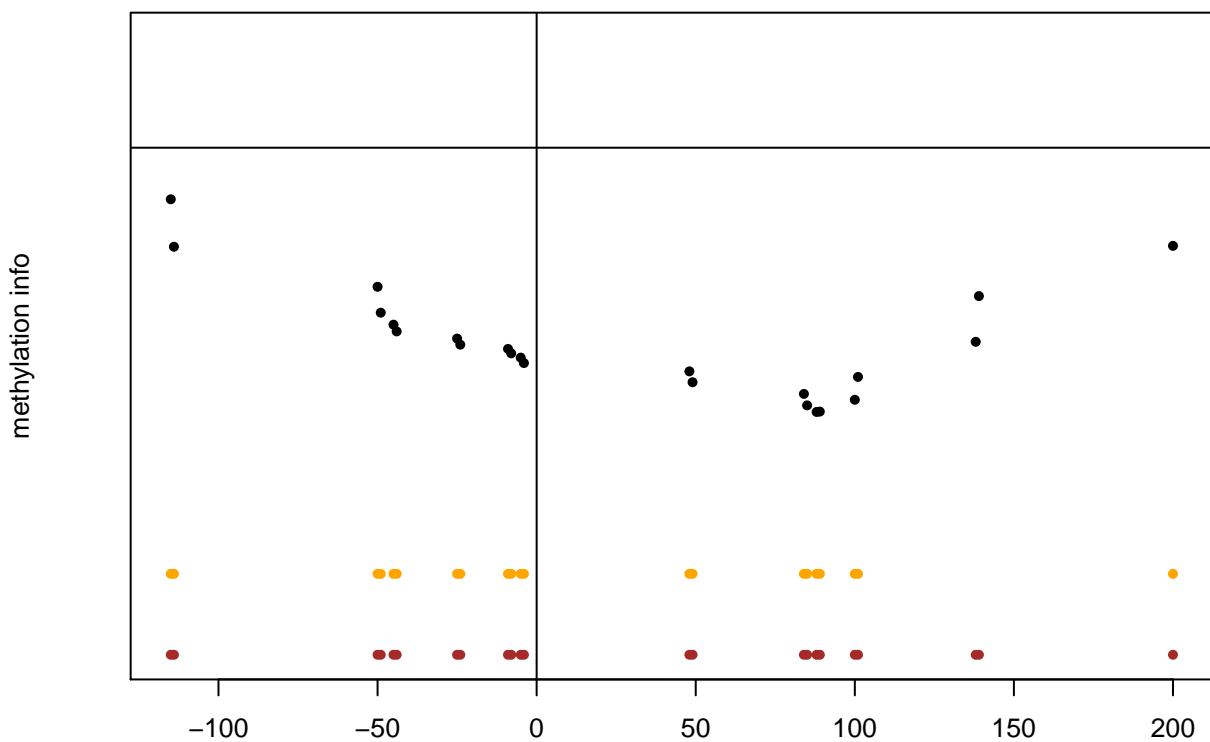

KLHL14 raw %methylation, red=UC, blue=Normal

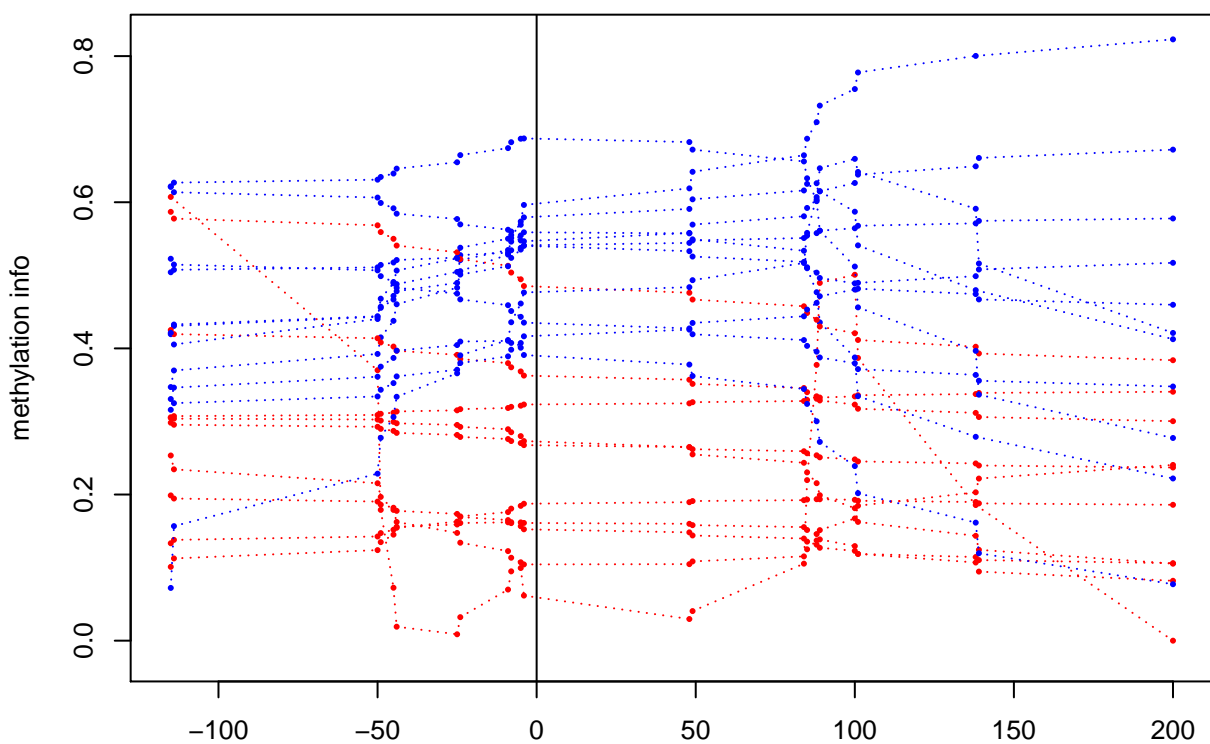

RNAseq logFC(UC-N)= 1.92

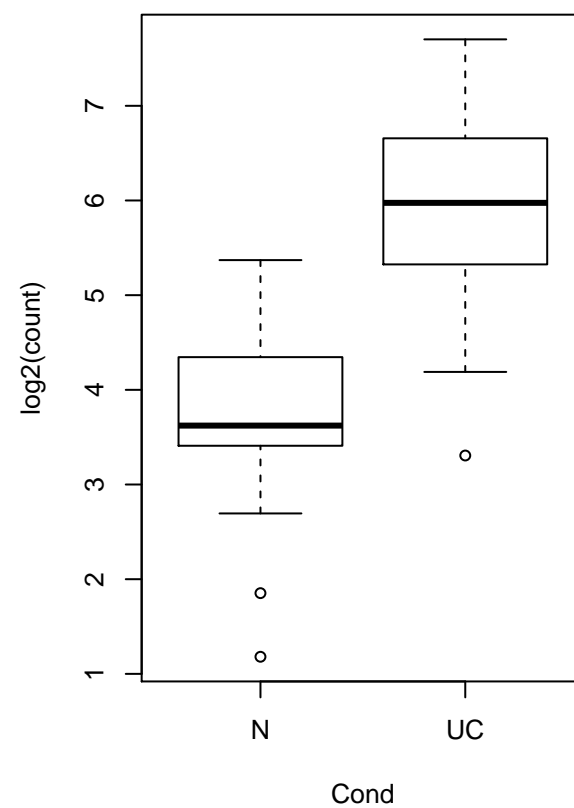

KLHL5 average UC-N %methylation max=0.34% min=-10.83%

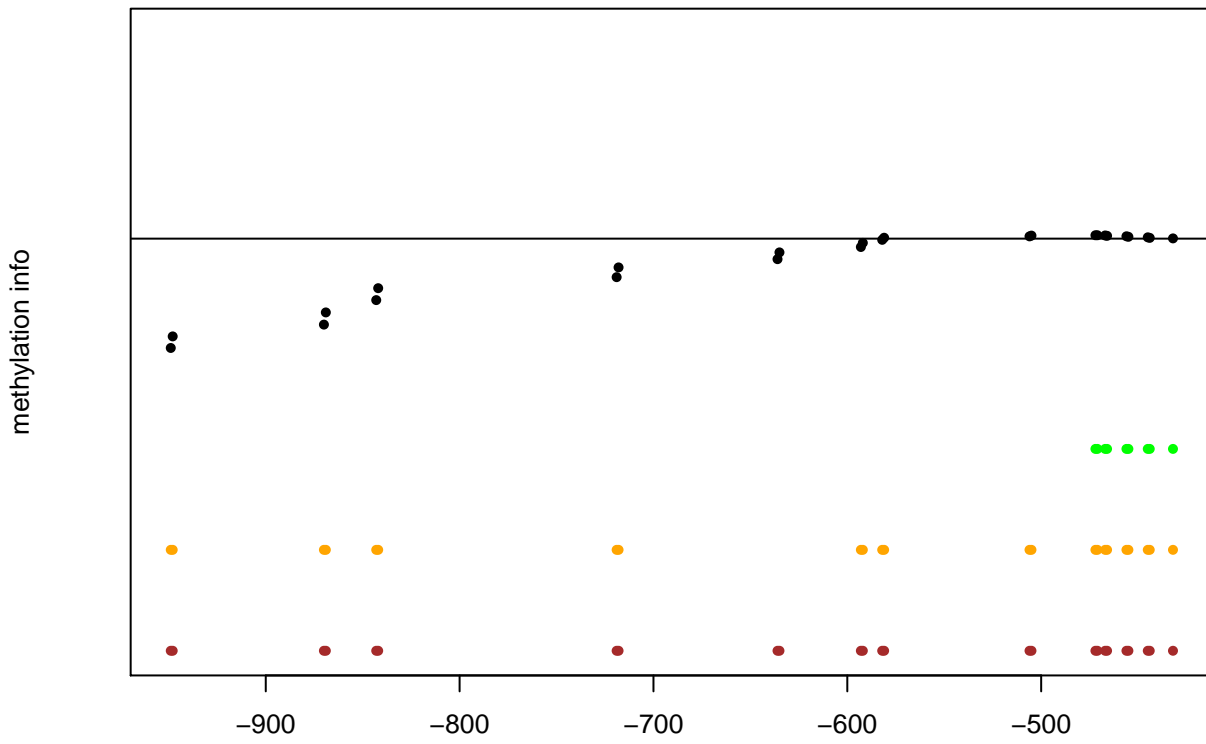

KLHL5 raw %methylation, red=UC, blue=Normal

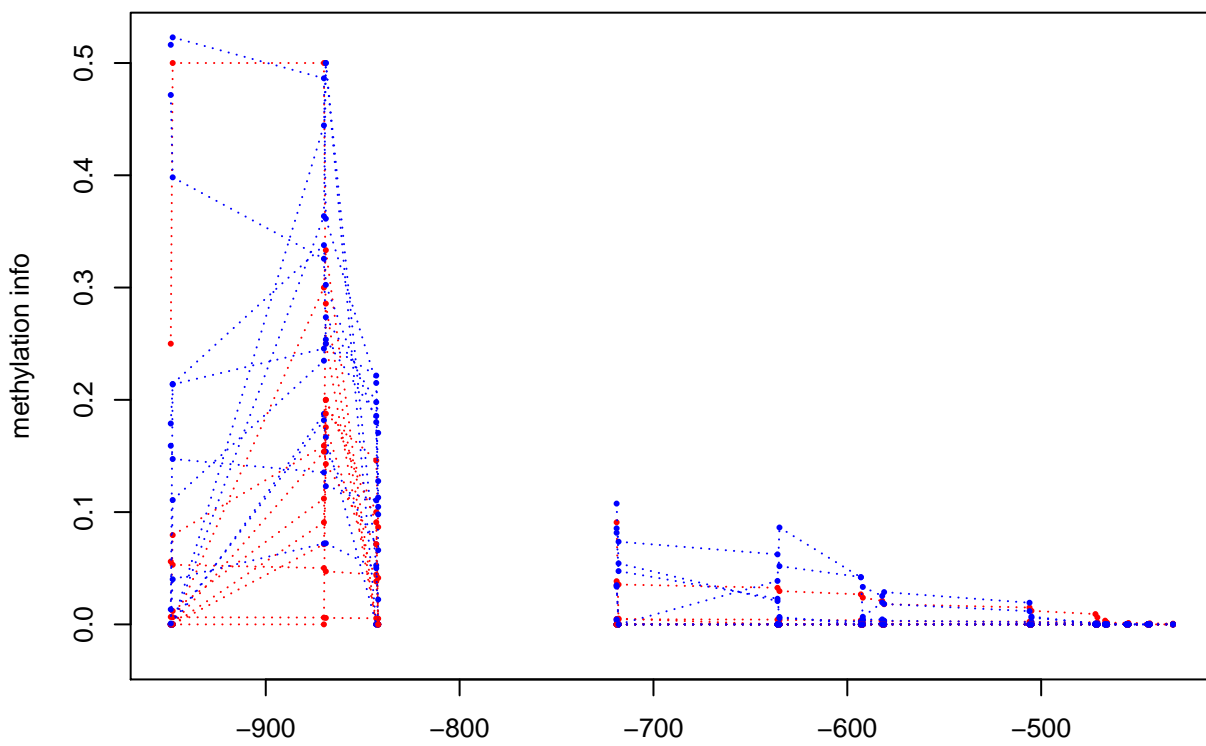

RNAseq logFC(UC-N)= 1.09

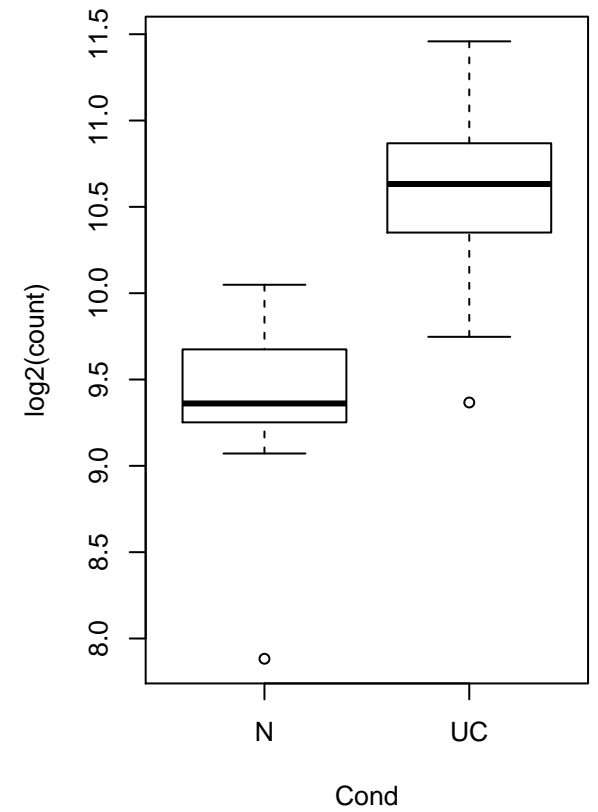

KLHL6 average UC-N %methylation max=-30.06% min=-39.39%

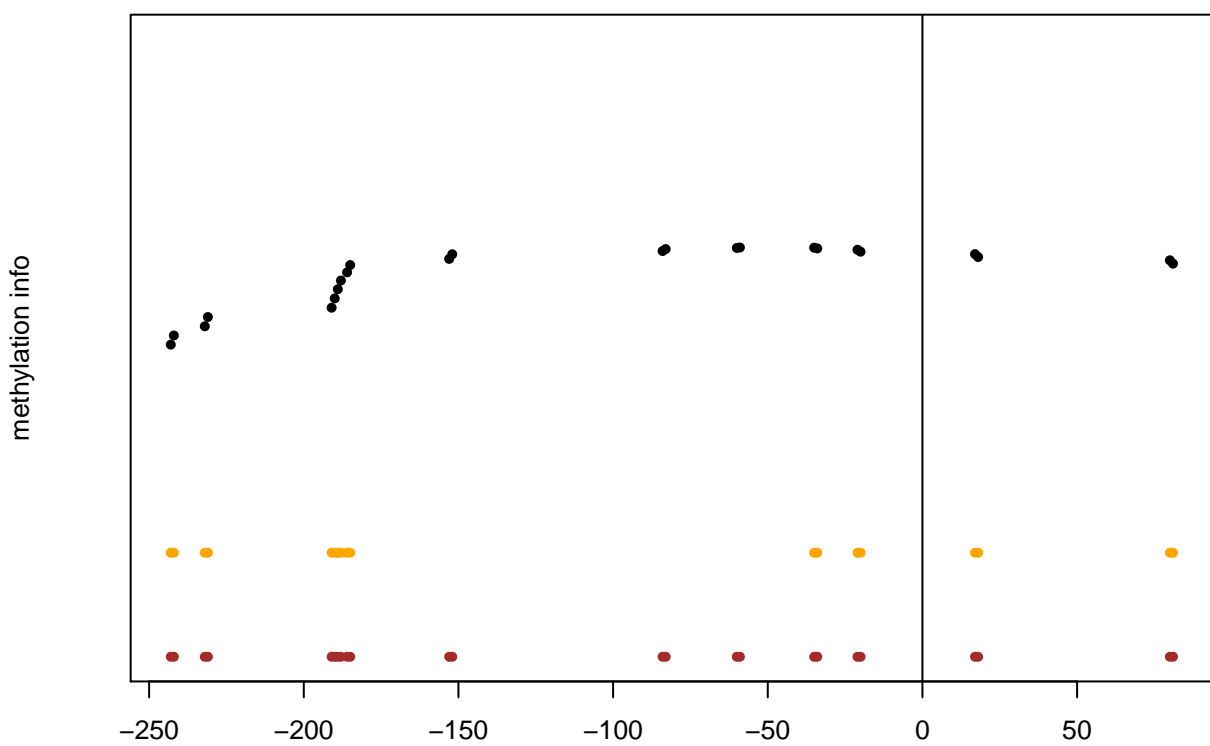

KLHL6 raw %methylation, red=UC, blue=Normal

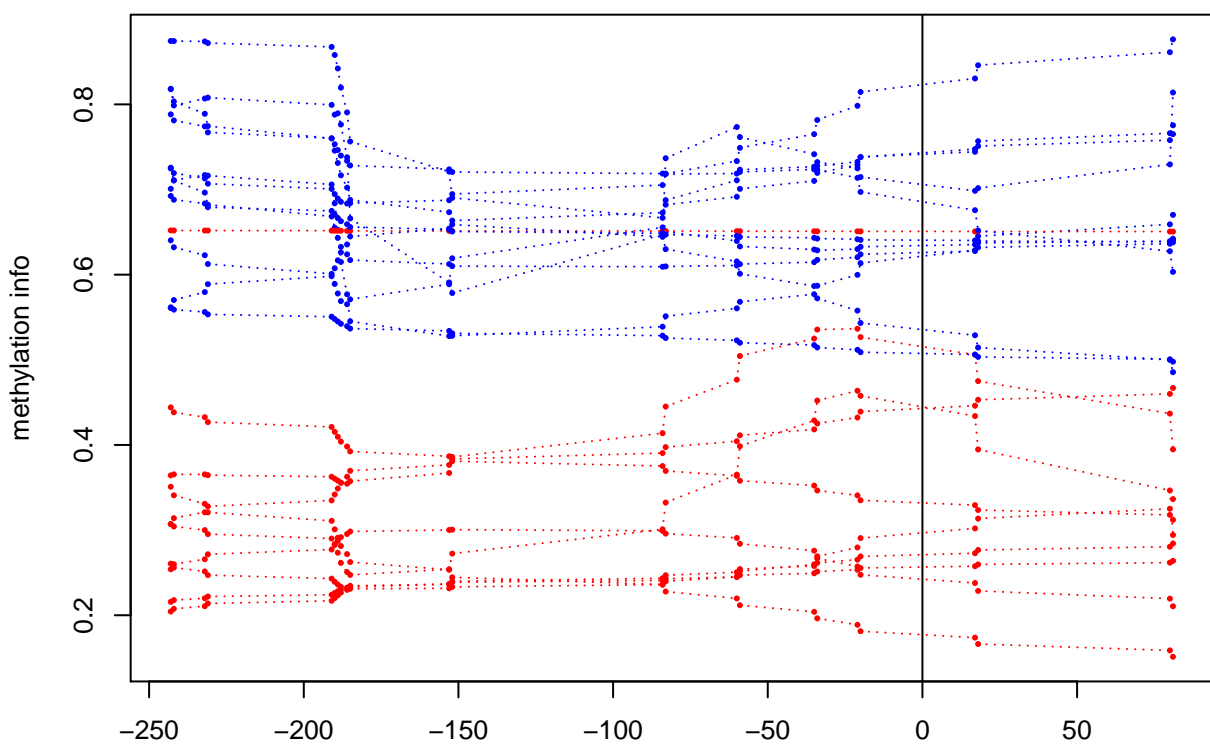

RNAseq logFC(UC-N)= 1.1

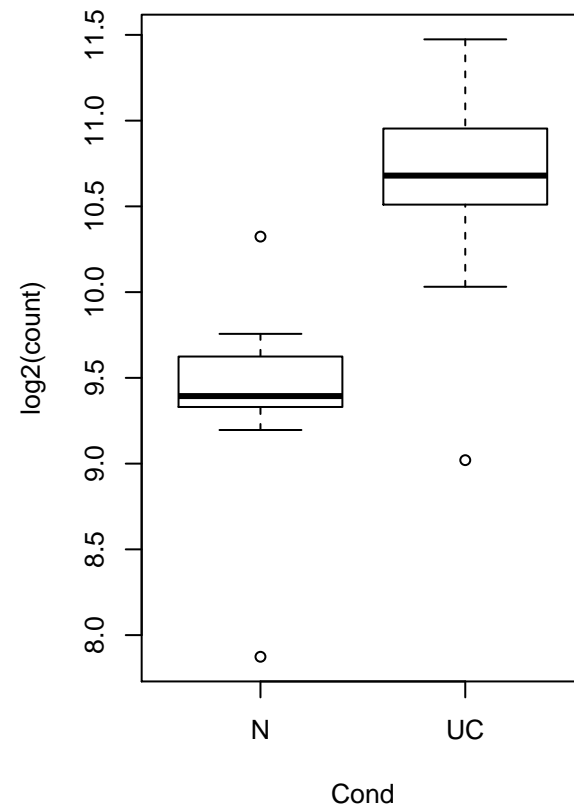

LAG3 average UC-N %methylation max=-6.54% min=-28.71%

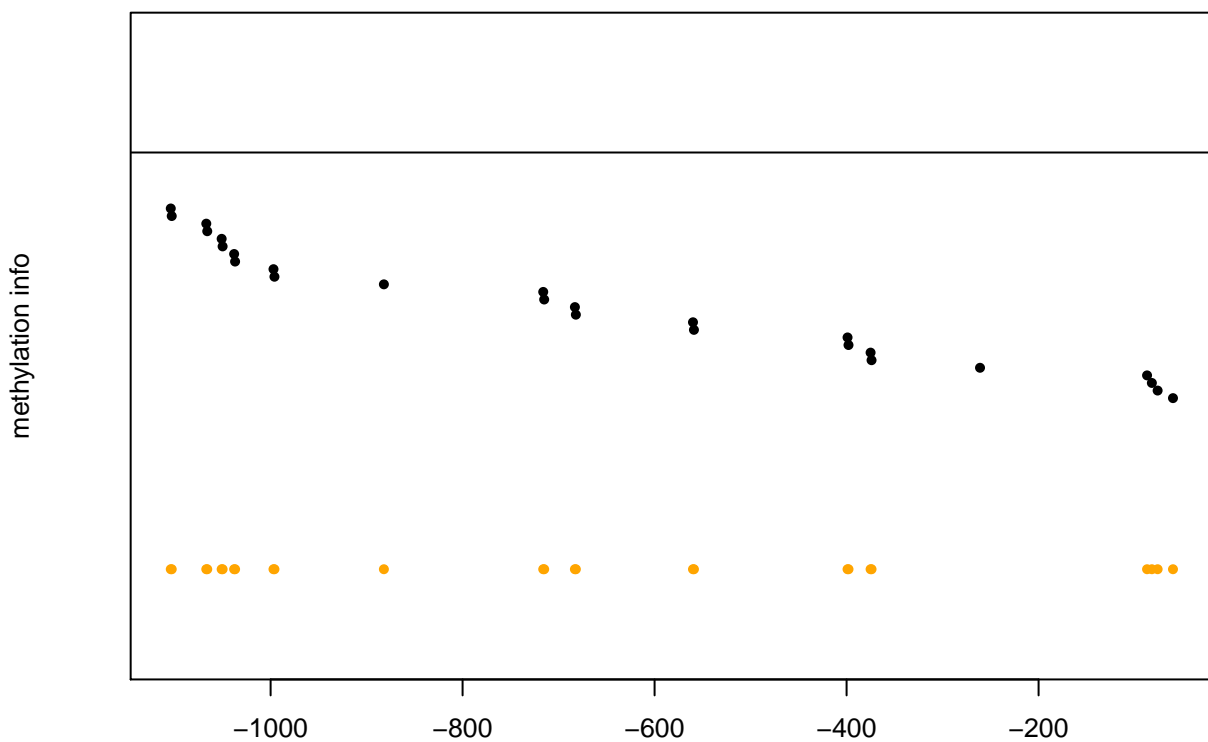

LAG3 raw %methylation, red=UC, blue=Normal

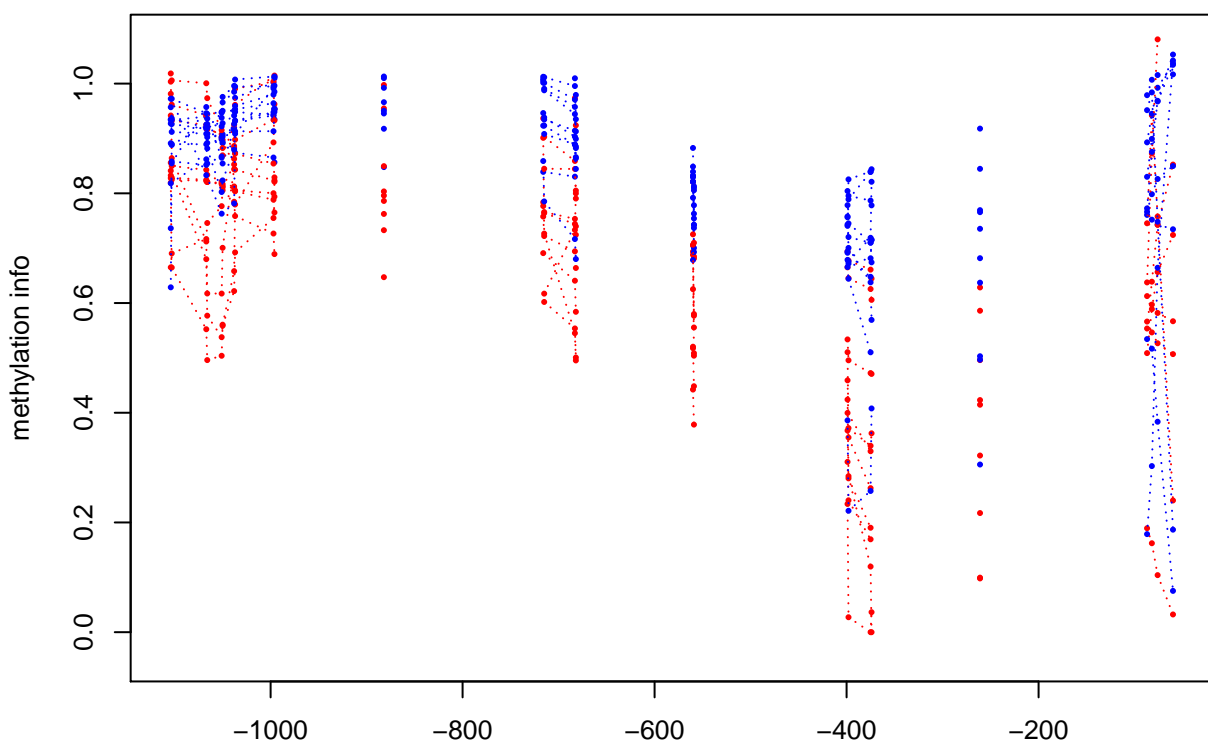

RNAseq logFC(UC-N)= 1.89

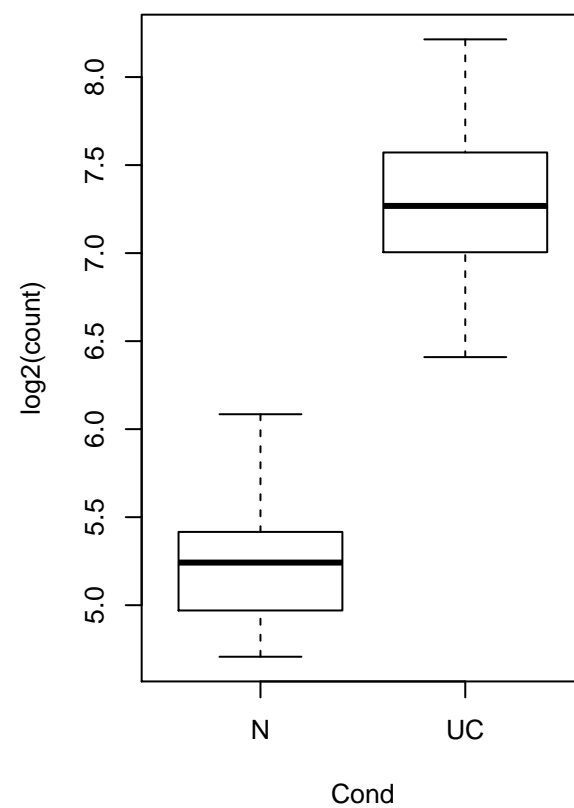



LAT average UC-N %methylation max=-15.53% min=-23.36%

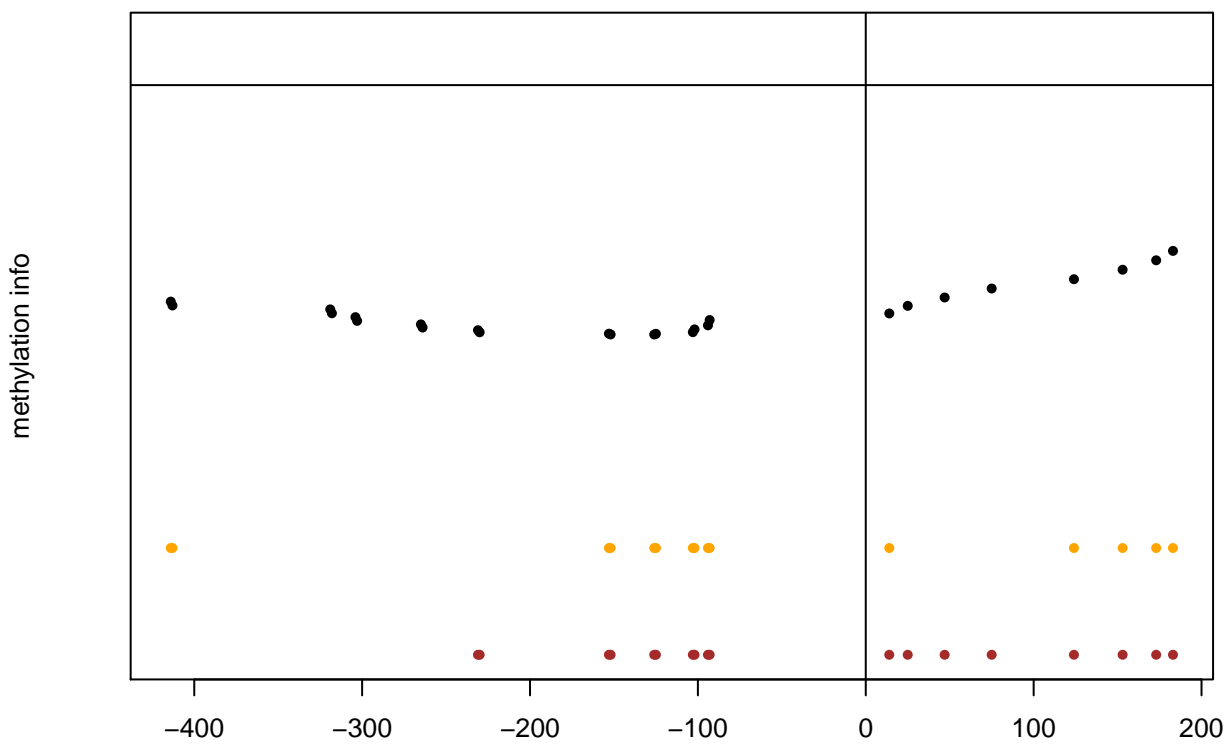

LAT raw %methylation, red=UC, blue=Normal

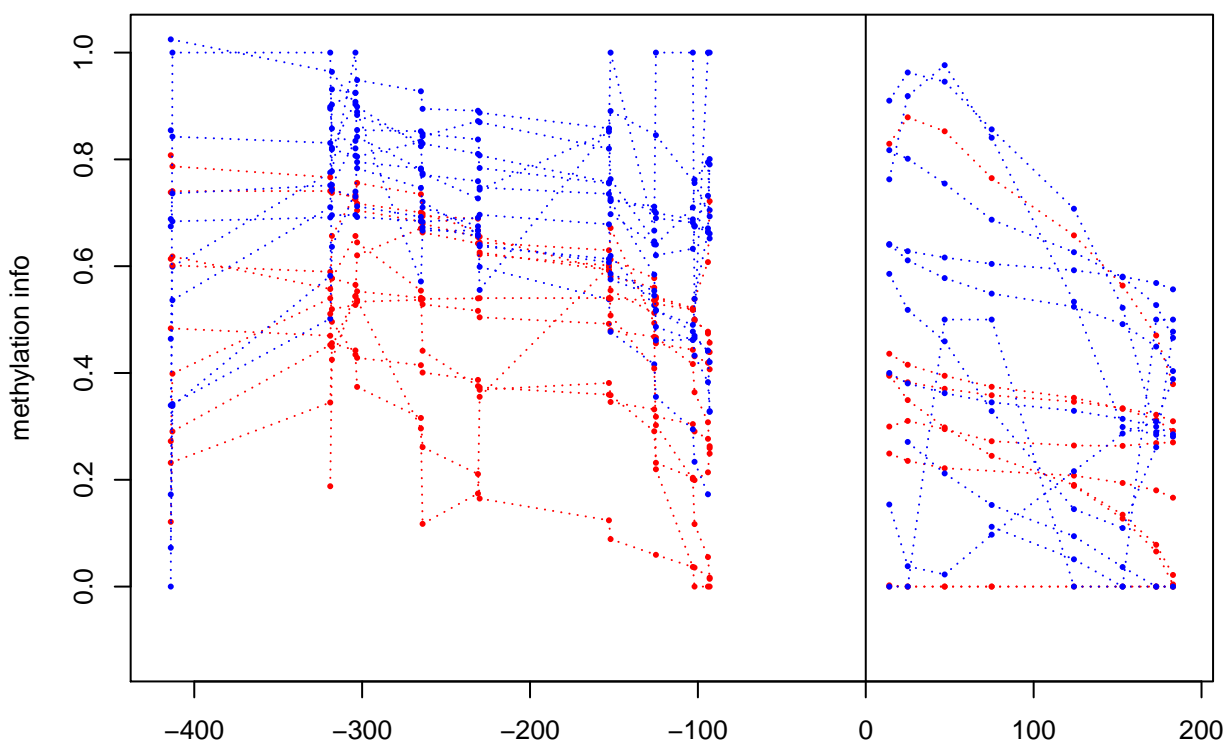

RNAseq logFC(UC-N)= 1.21

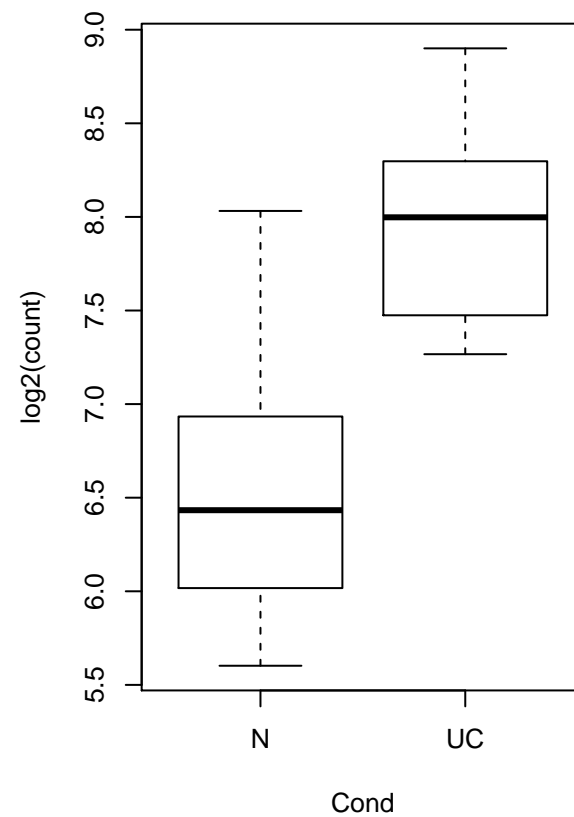

LAX1 average UC-N %methylation max=-2.97% min=-32.28%

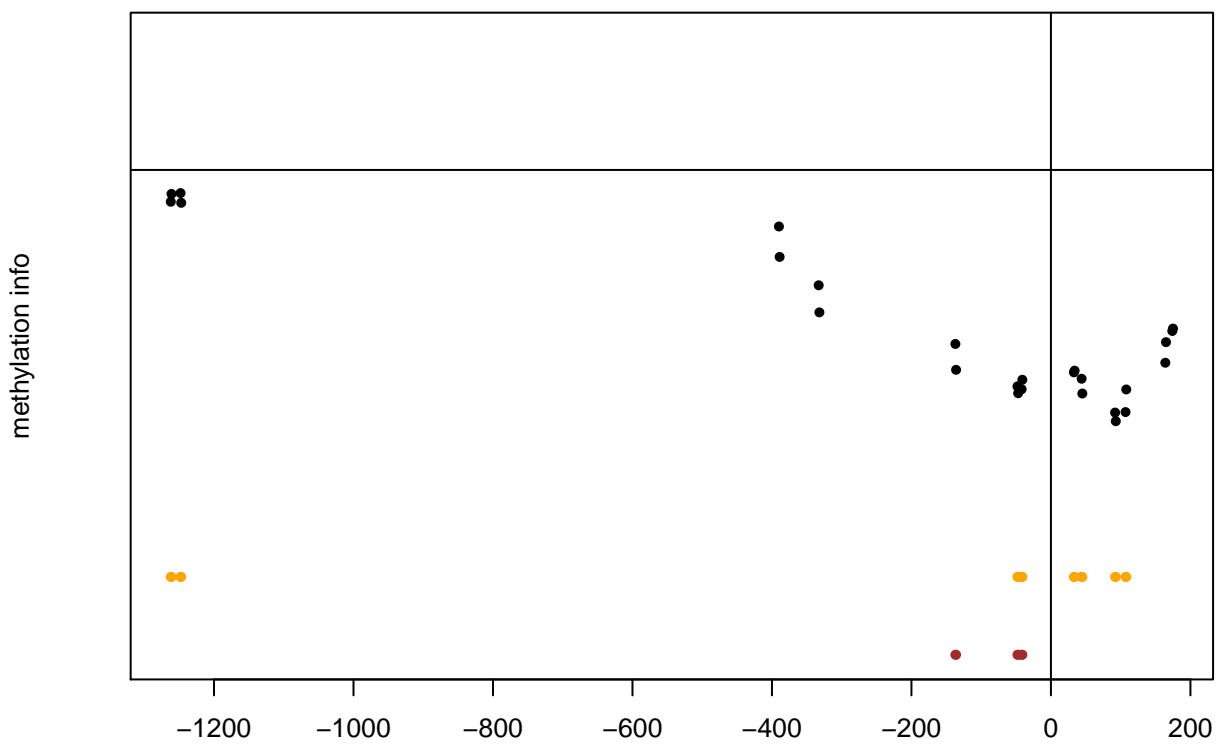

LAX1 raw %methylation, red=UC, blue=Normal

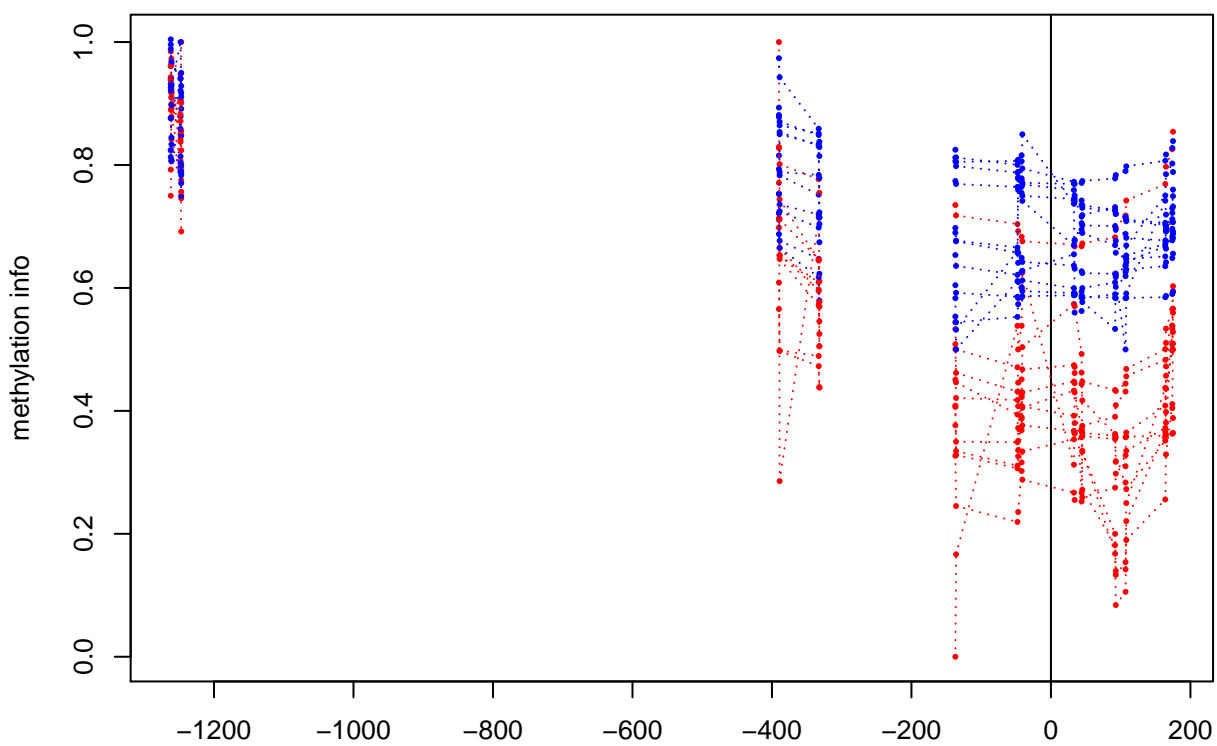

RNAseq logFC(UC-N)= 1.88

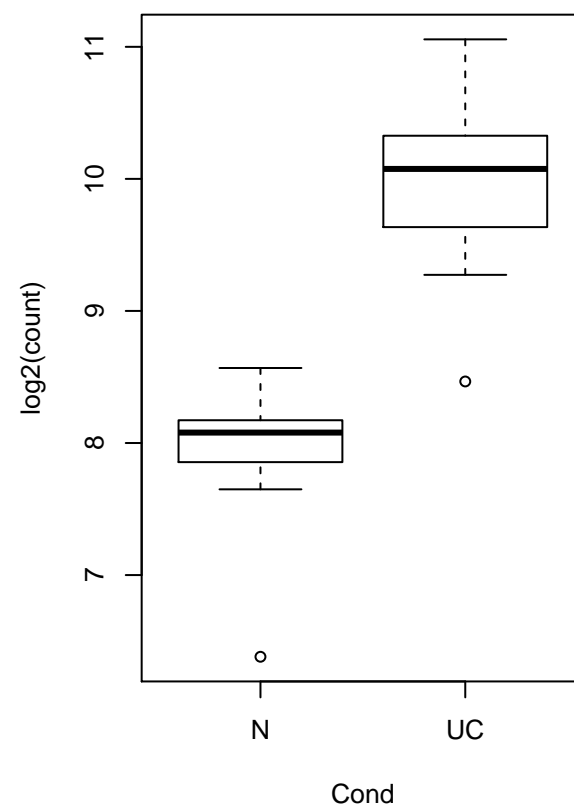

LCK average UC-N %methylation max=-18.98% min=-40.19%

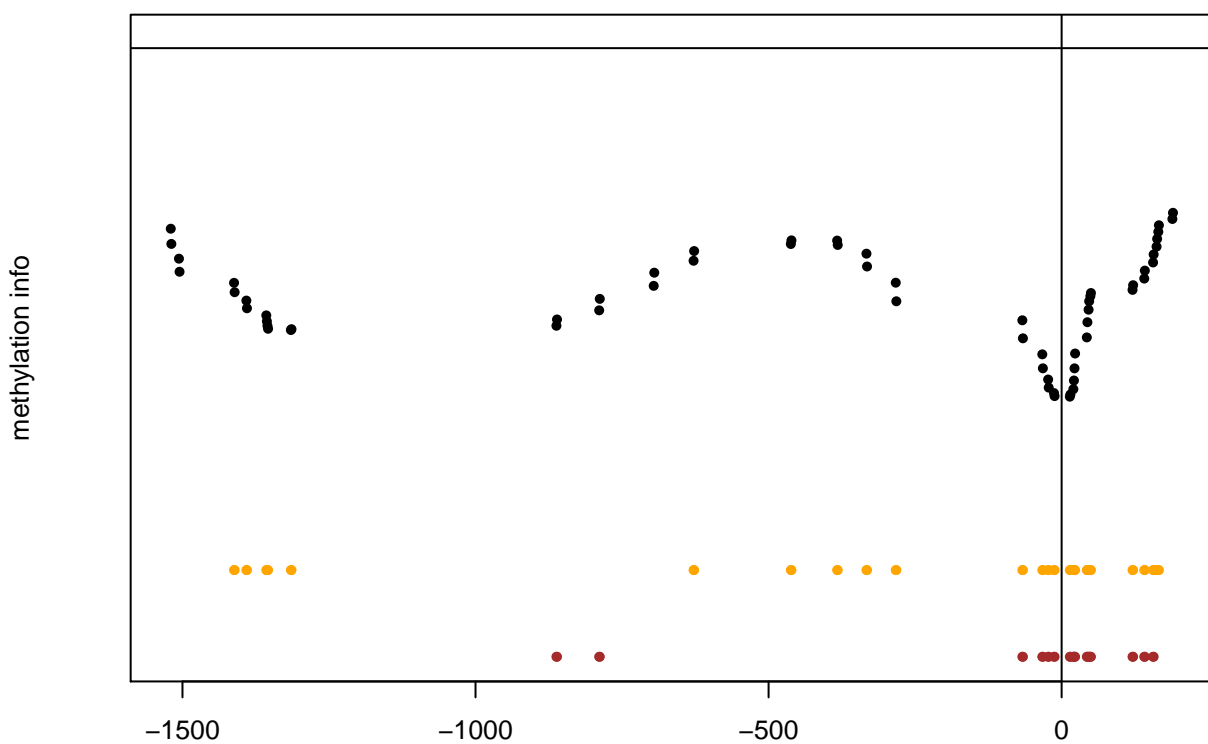

LCK raw %methylation, red=UC, blue=Normal

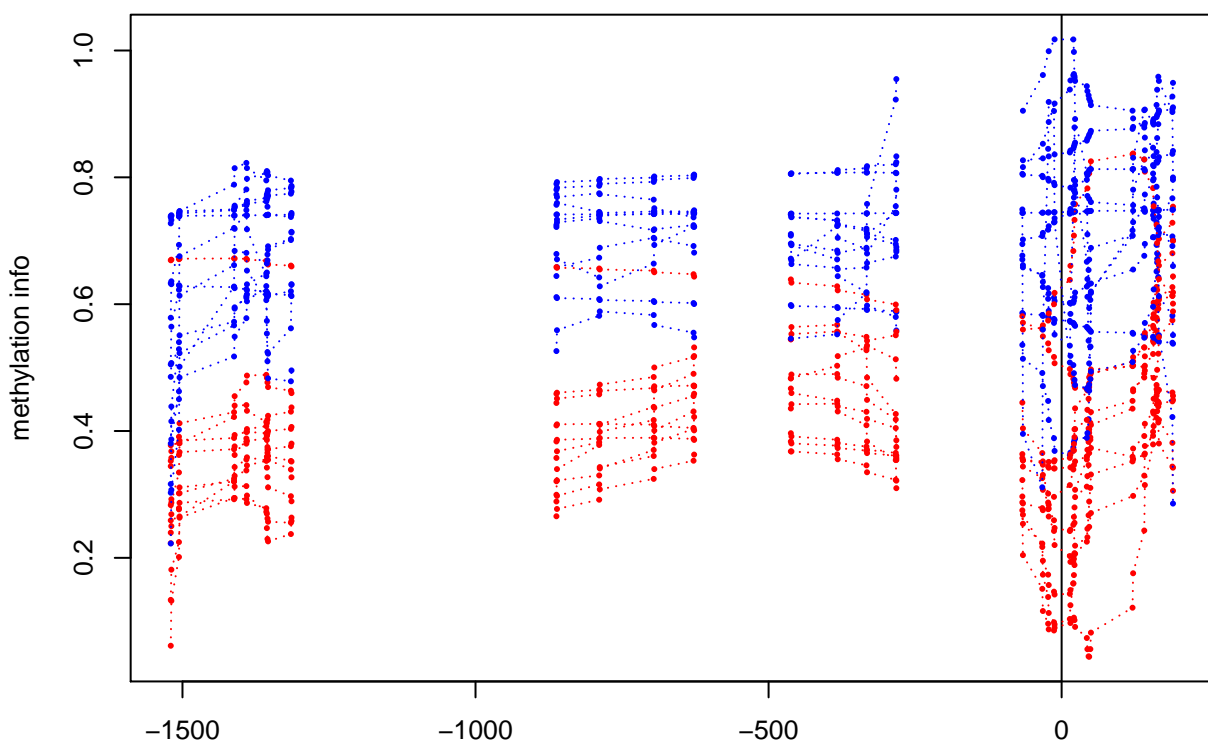

RNAseq logFC(UC-N)= 1.42

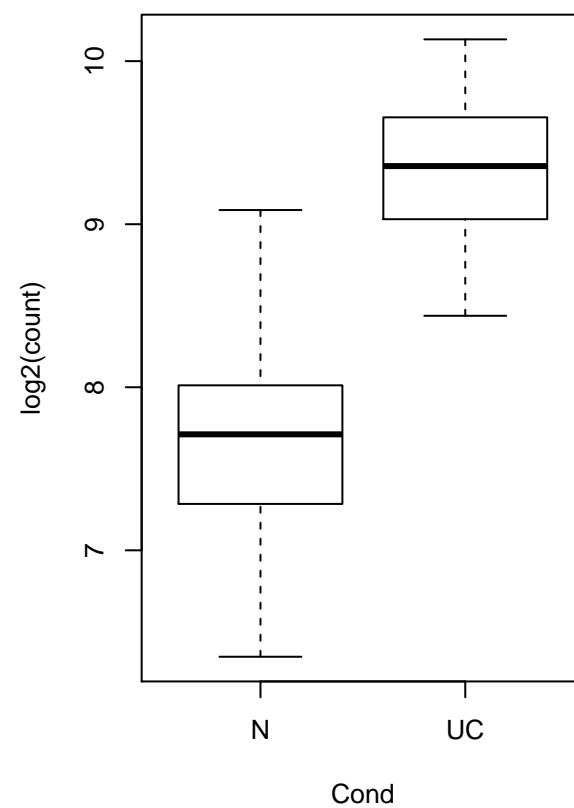

LCN2 average UC-N %methylation max=11.49% min=-33.68%

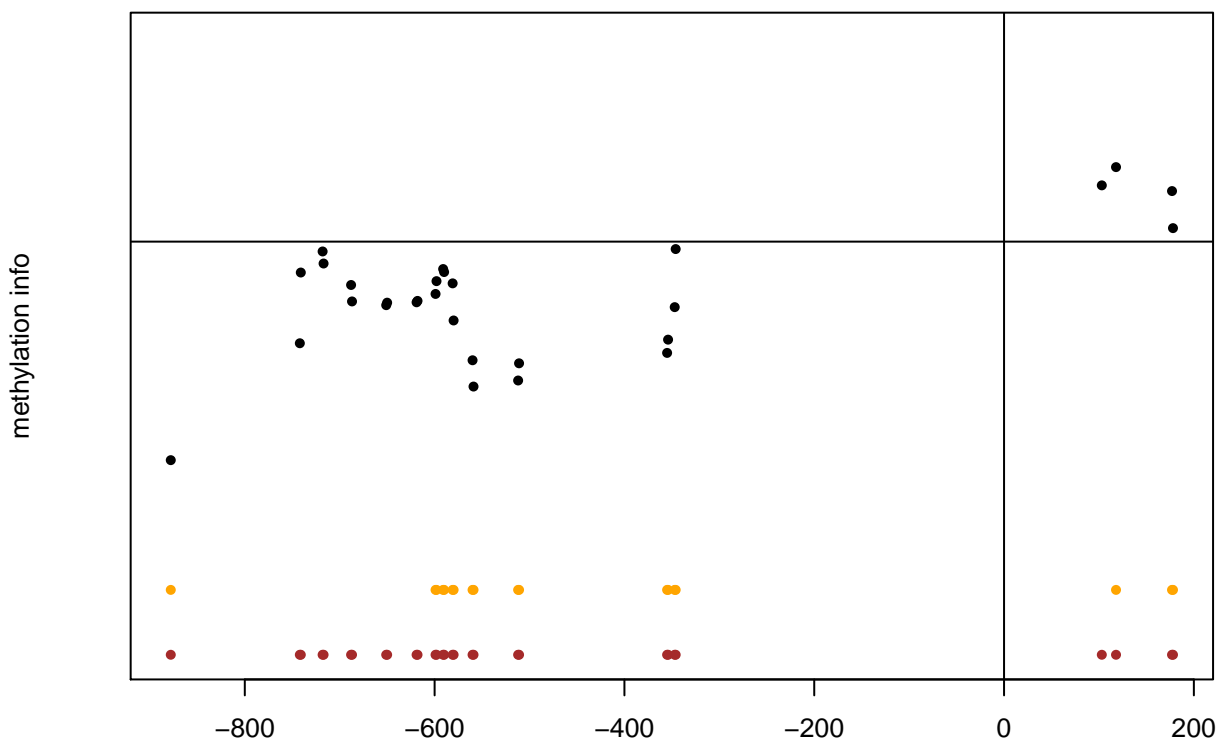

LCN2 raw %methylation, red=UC, blue=Normal

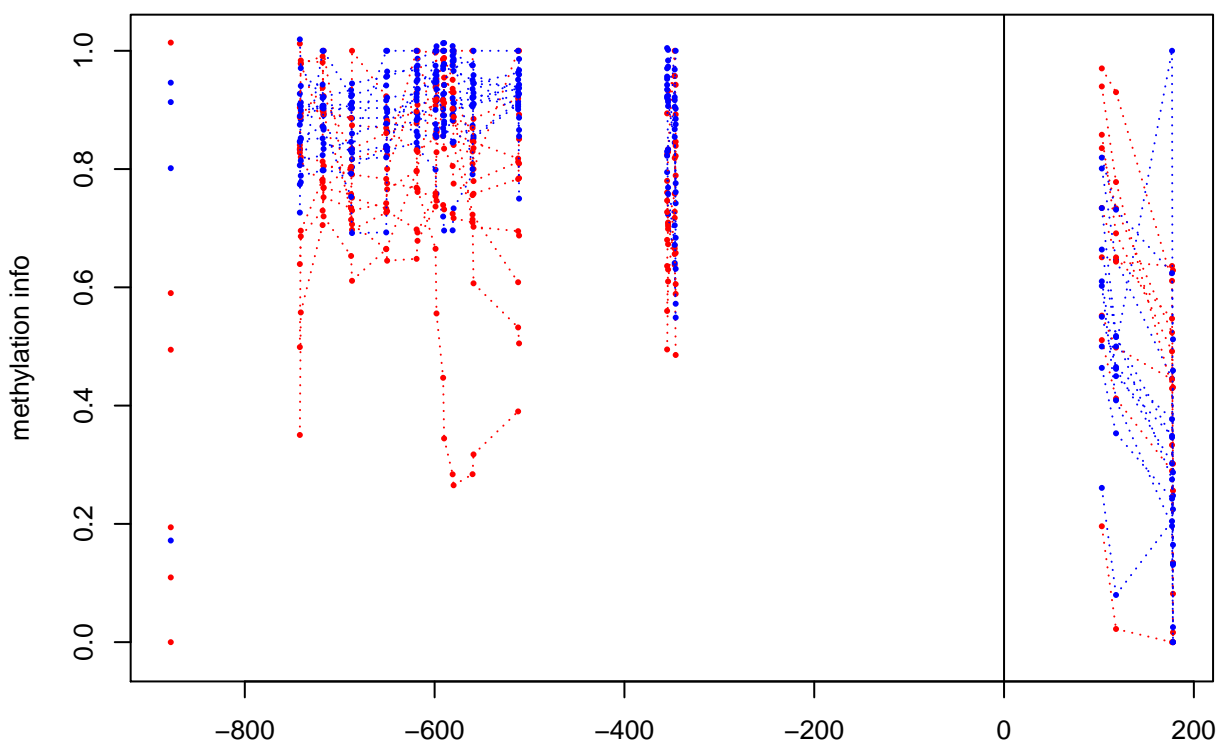

RNAseq logFC(UC-N)= 4.95

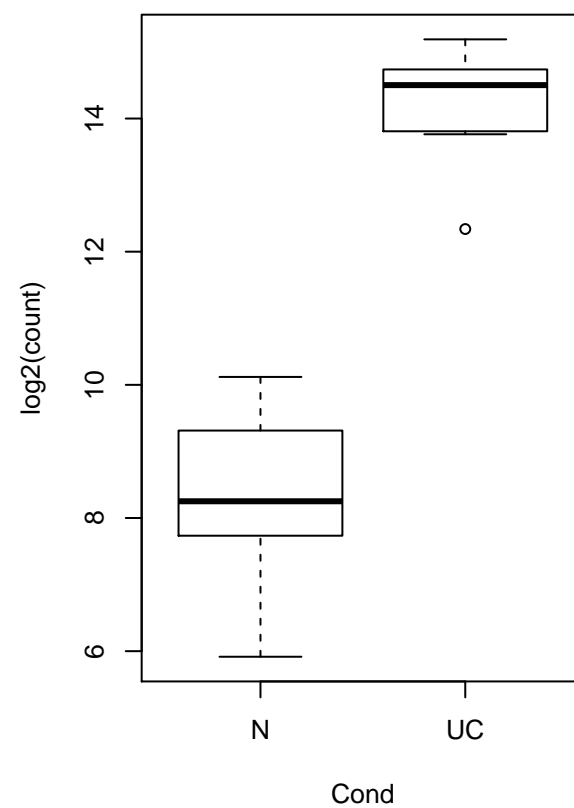

LCP2 average UC-N %methylation max=-15.67% min=-34.11%

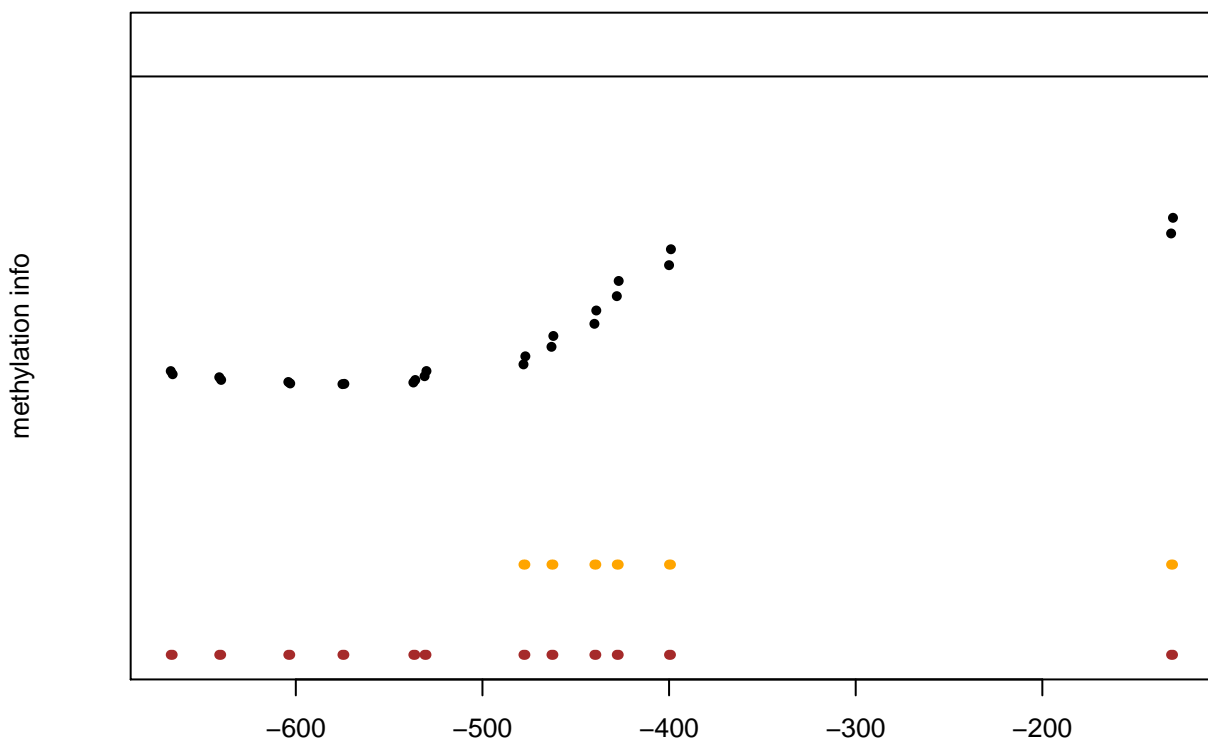

LCP2 raw %methylation, red=UC, blue=Normal

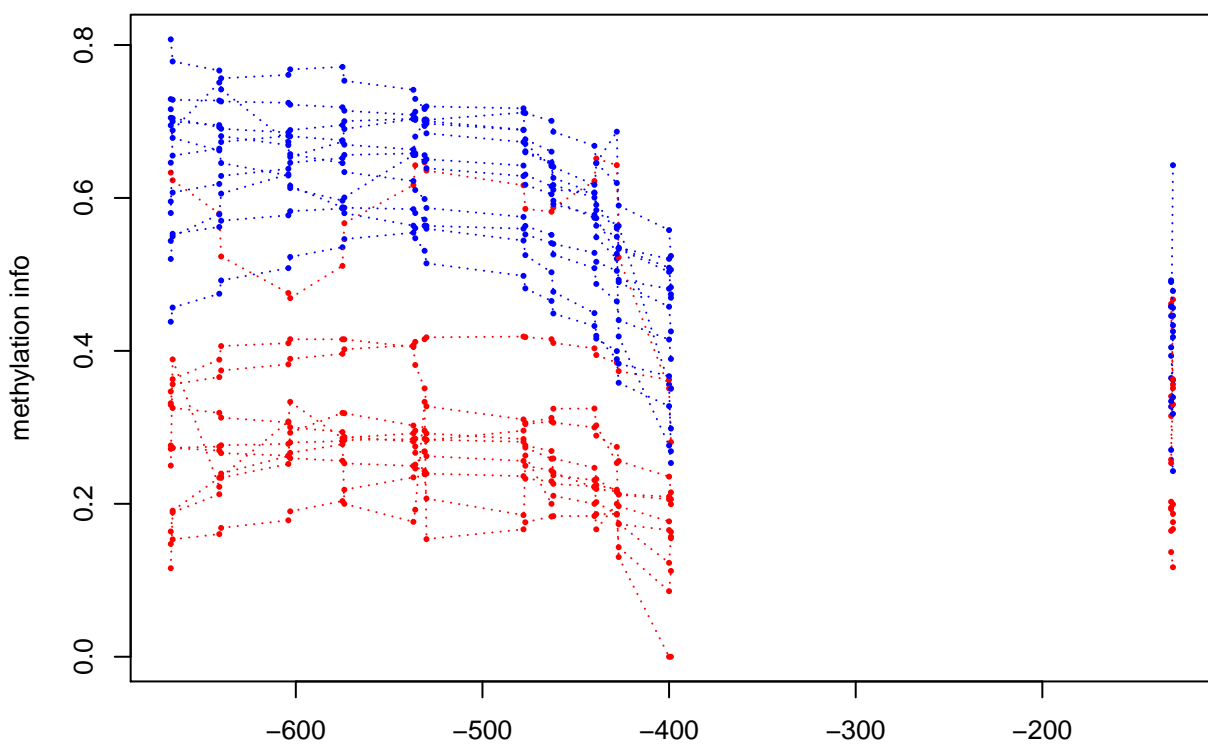

RNAseq logFC(UC-N)= 1.06

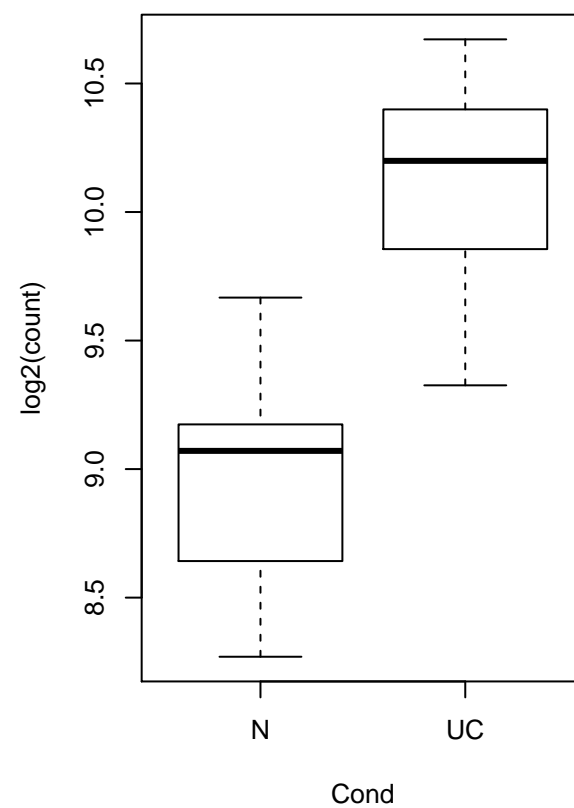

LDHD average UC-N %methylation max=9.03% min=-5.64%

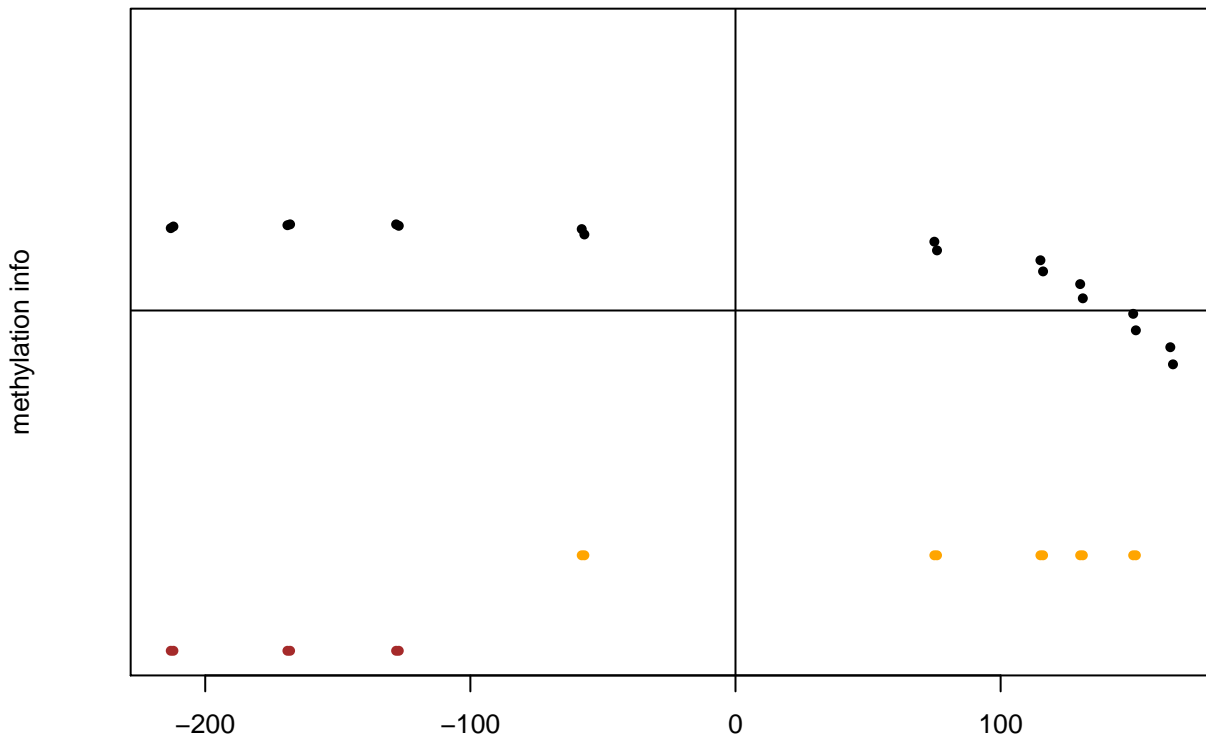

LDHD raw %methylation, red=UC, blue=Normal

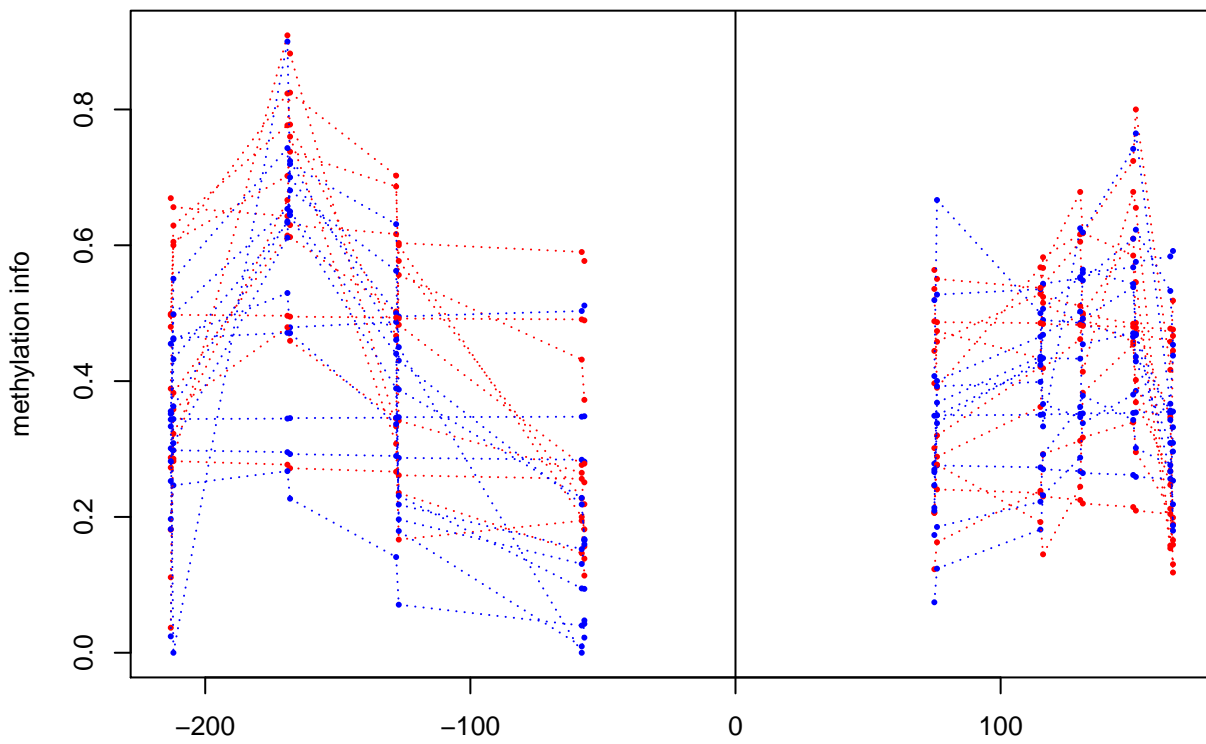

RNAseq logFC(UC-N)= -1.11

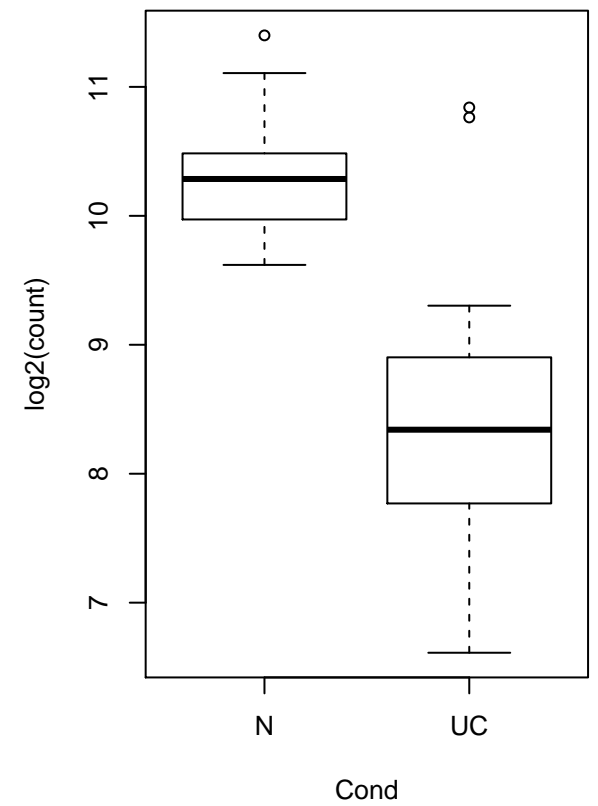

LEF1 average UC-N %methylation max=1.08% min=-16.02%

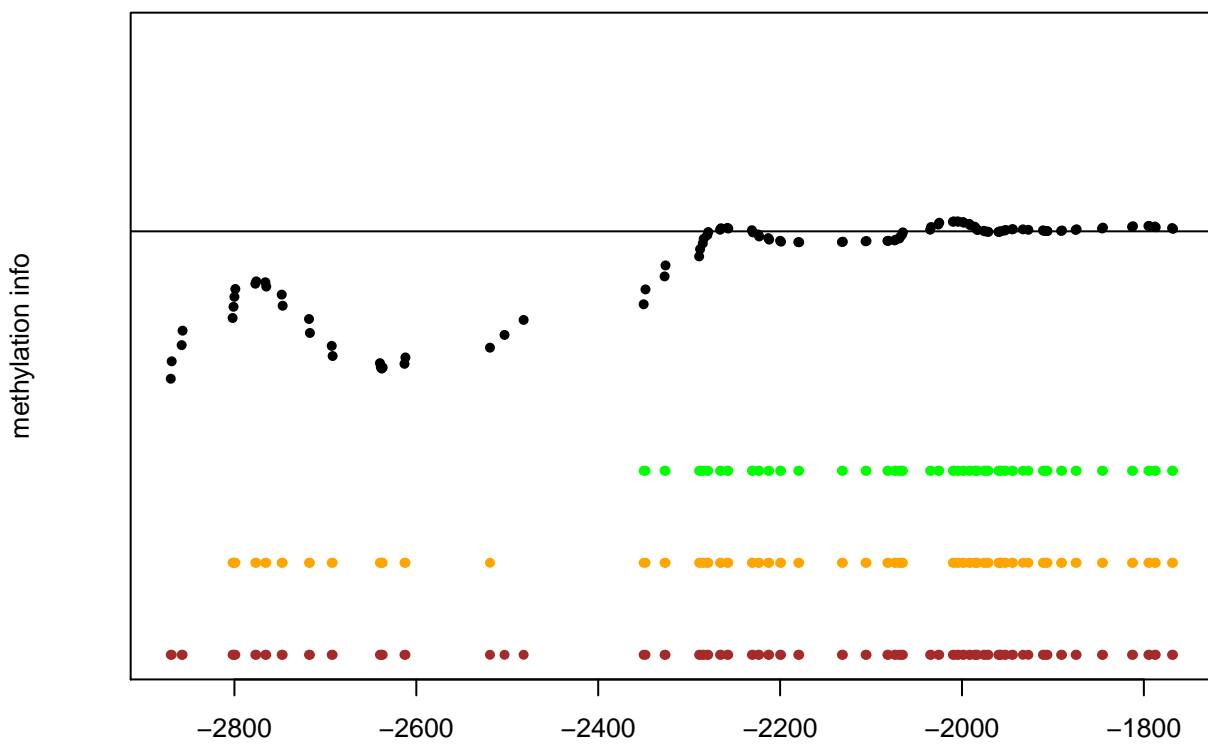

LEF1 raw %methylation, red=UC, blue=Normal

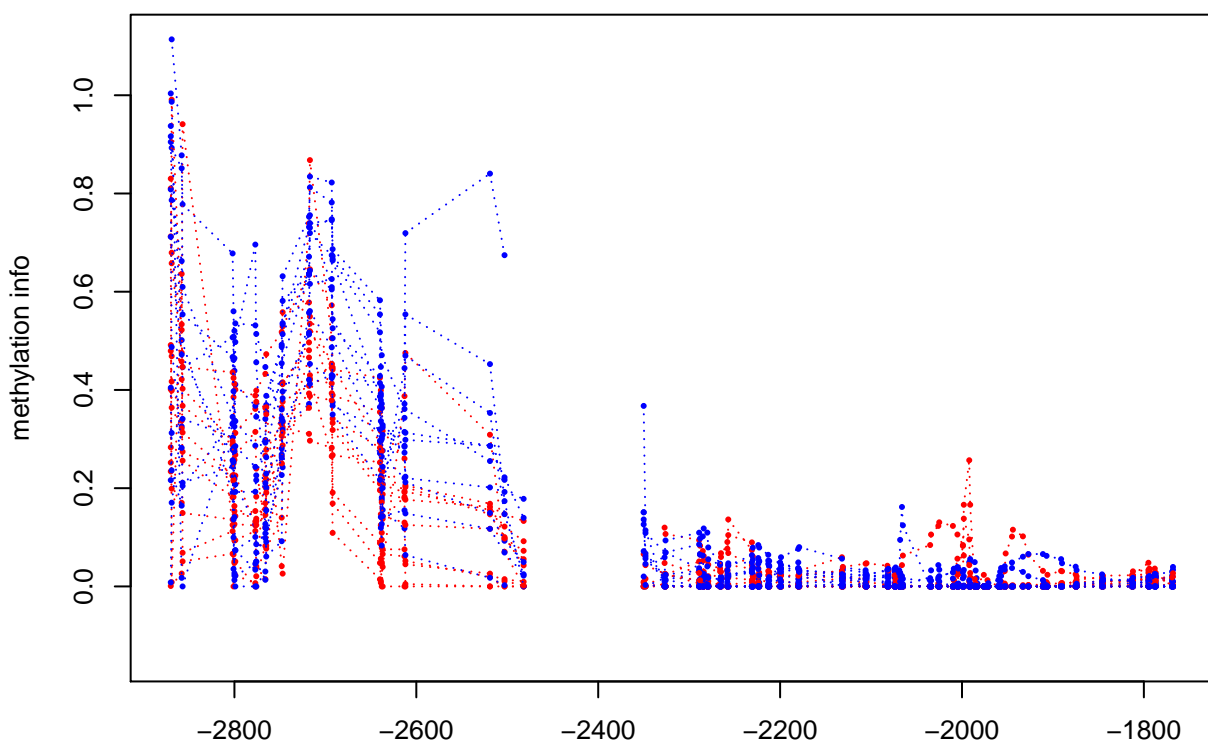

RNAseq logFC(UC-N)= 1.16

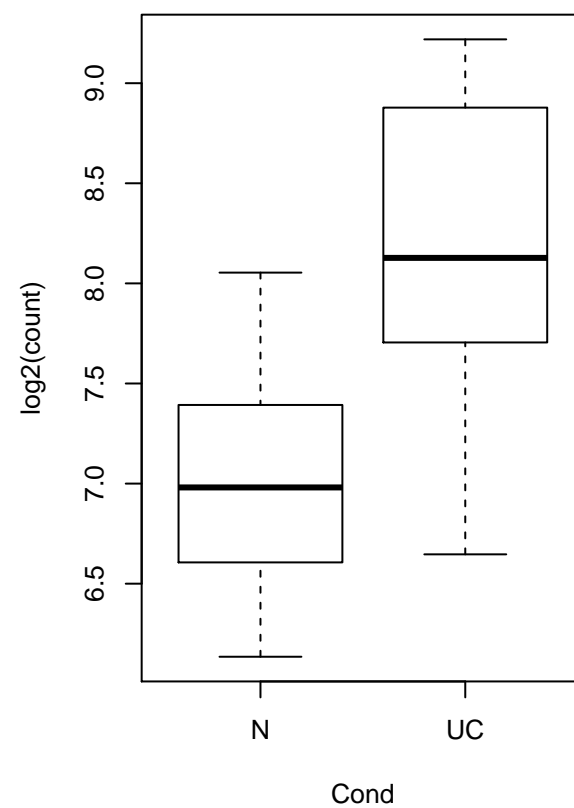

LIMD2 average UC-N %methylation max=-2.3% min=-23.78%

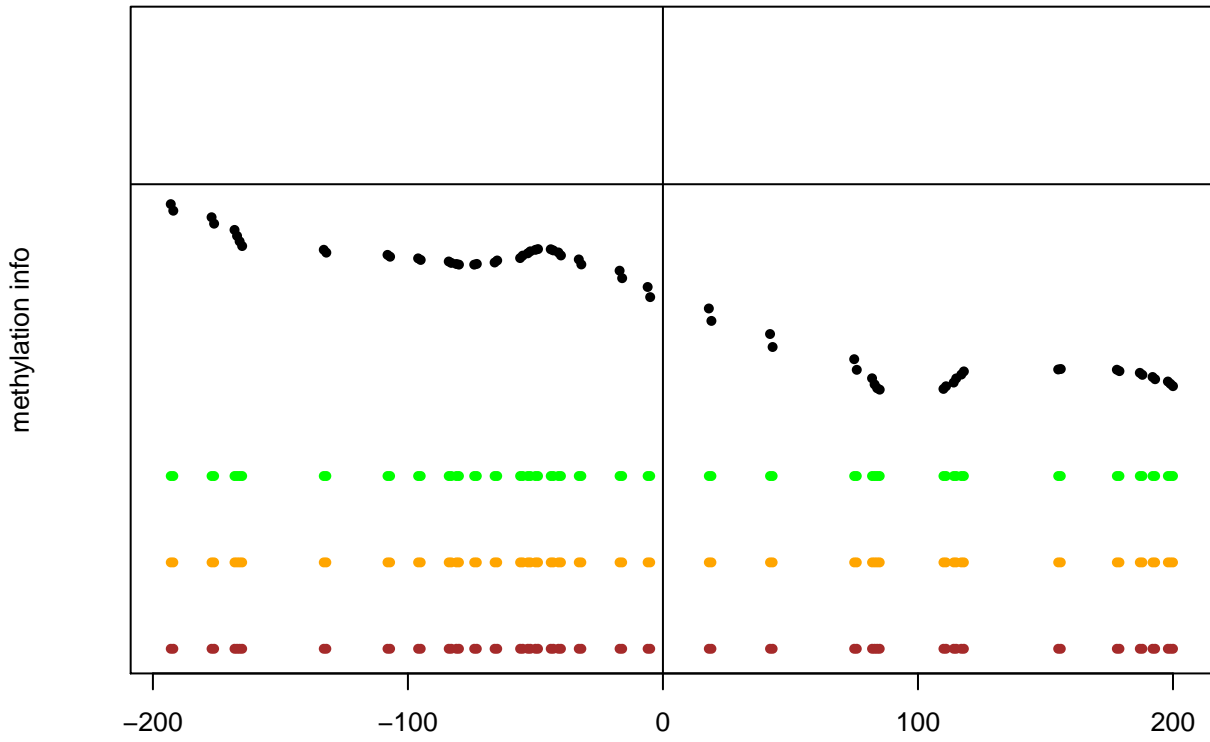

LIMD2 raw %methylation, red=UC, blue=Normal

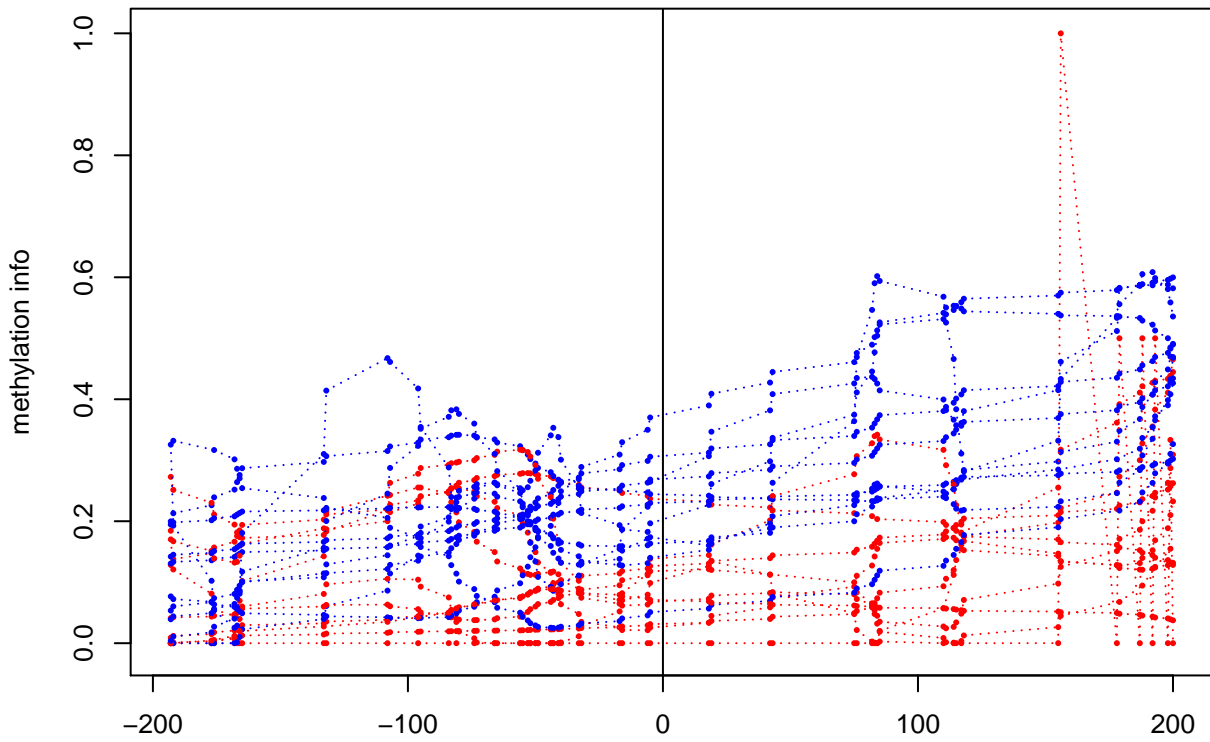

RNAseq logFC(UC-N)= 1.67

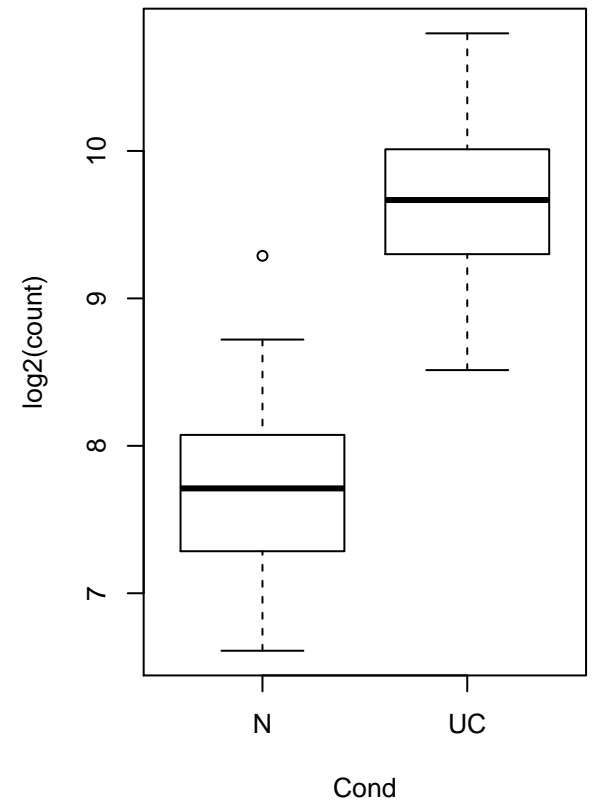



LINC00483 average UC-N %methylation max=29.98% min=-6.01%

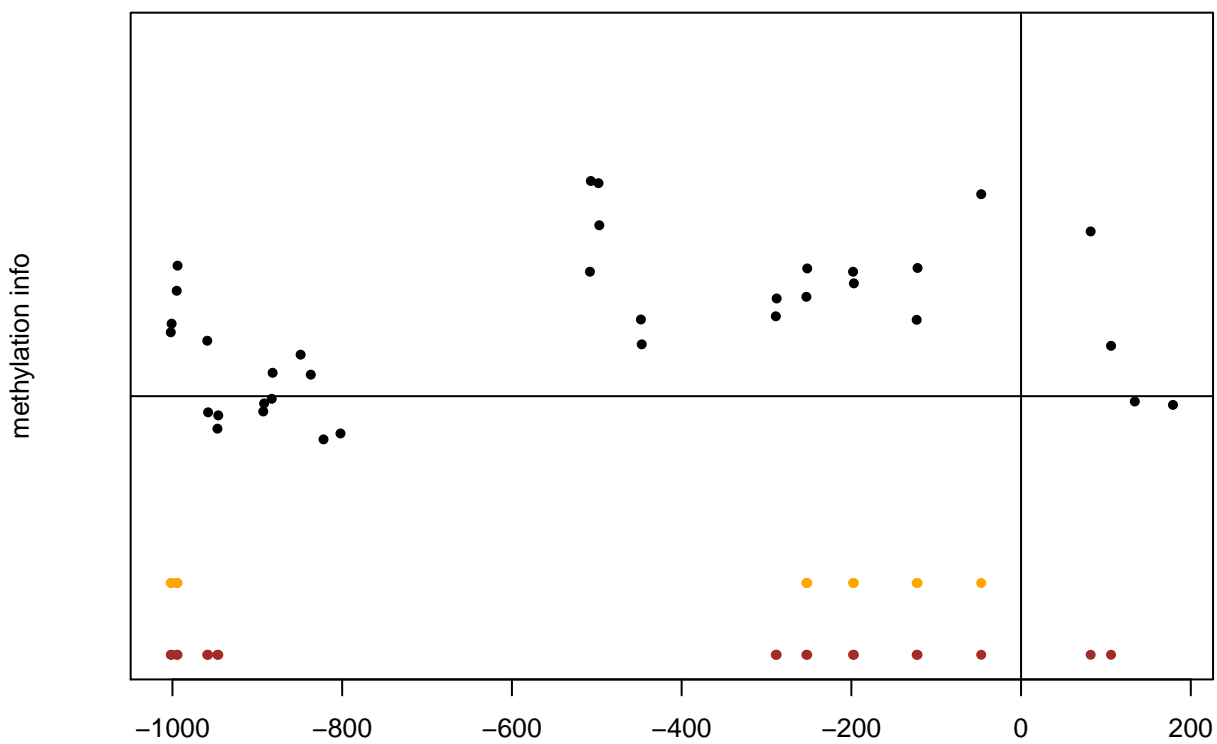

LINC00483 raw %methylation, red=UC, blue=Normal

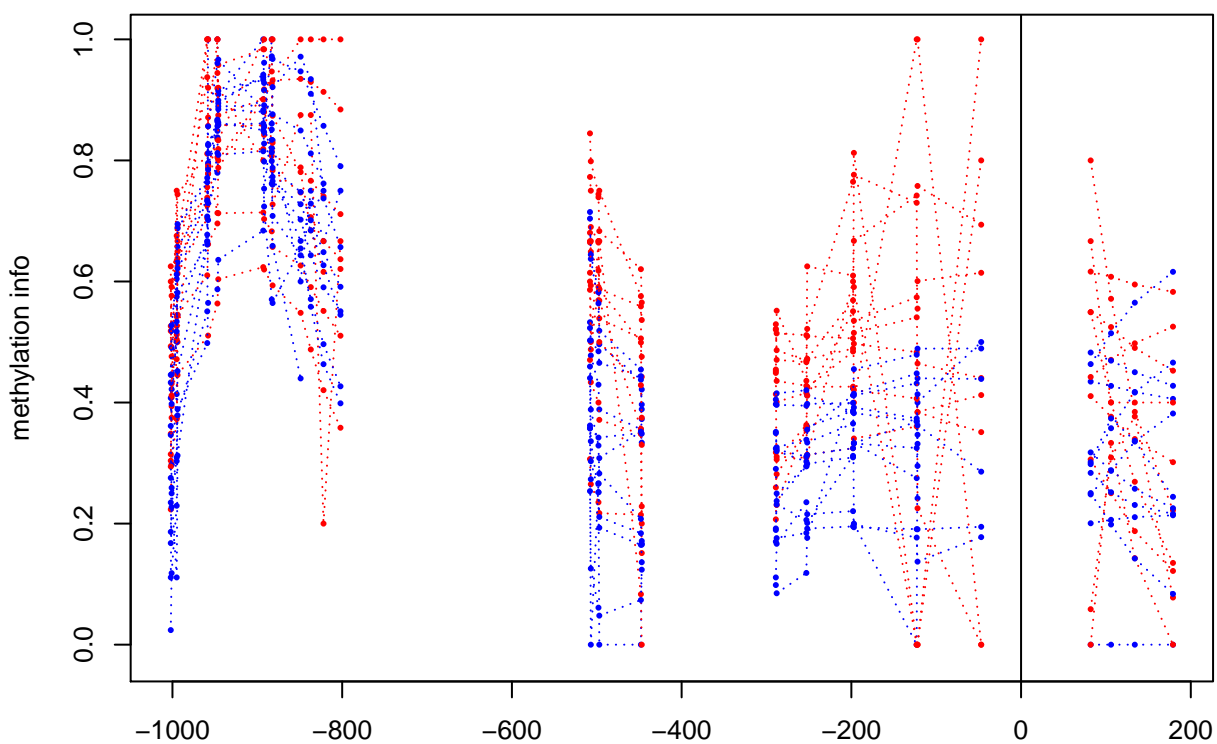

RNAseq logFC(UC-N)= -1.07

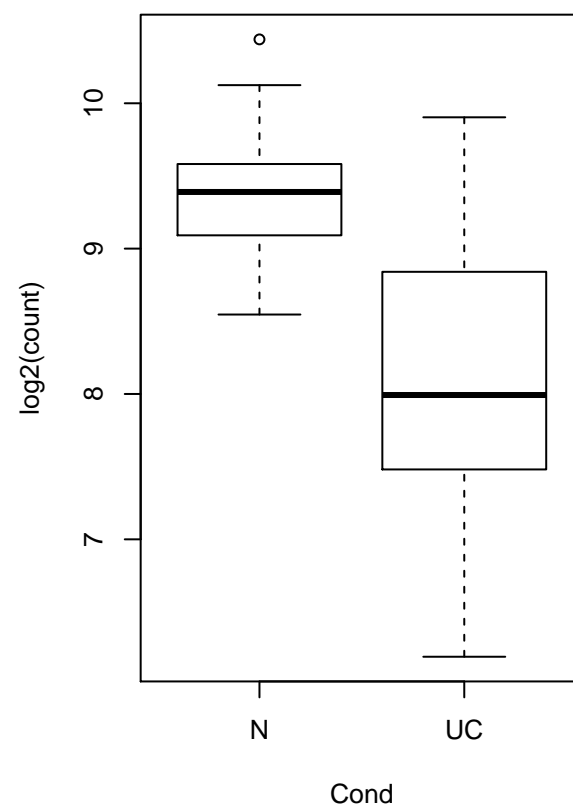

LINC00861 average UC-N %methylation max=-19.5% min=-30.86%

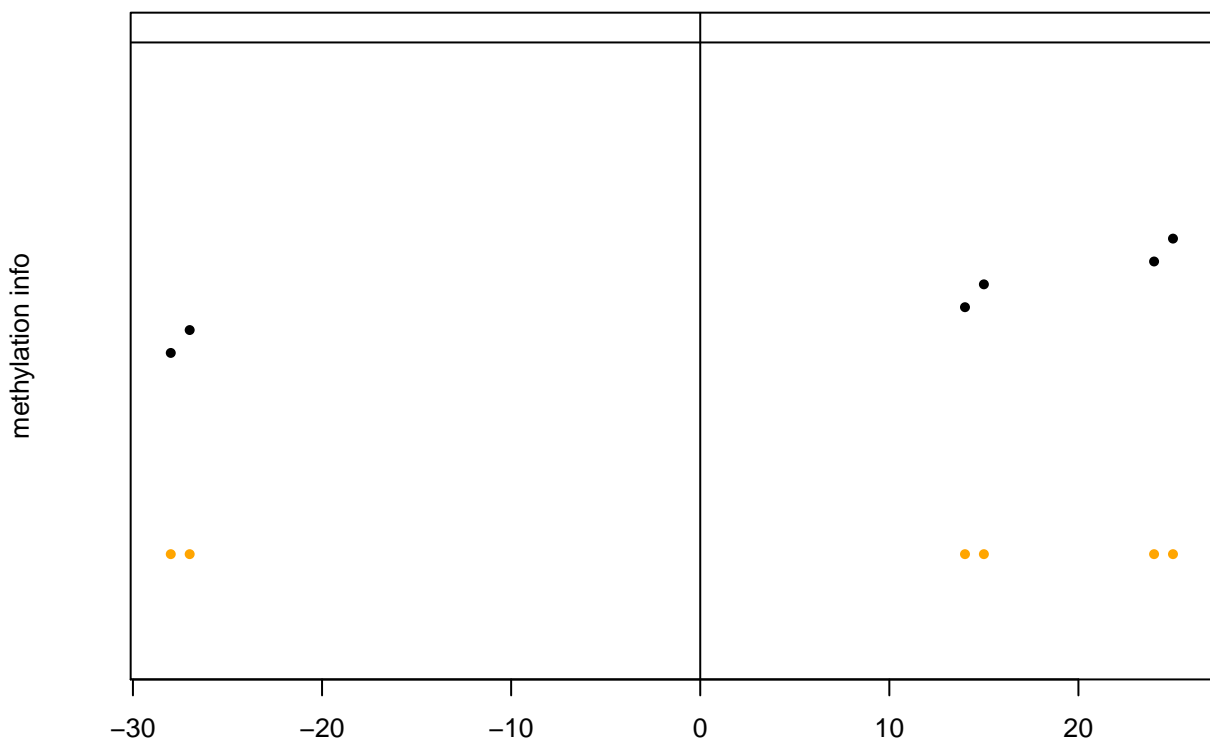

LINC00861 raw %methylation, red=UC, blue=Normal

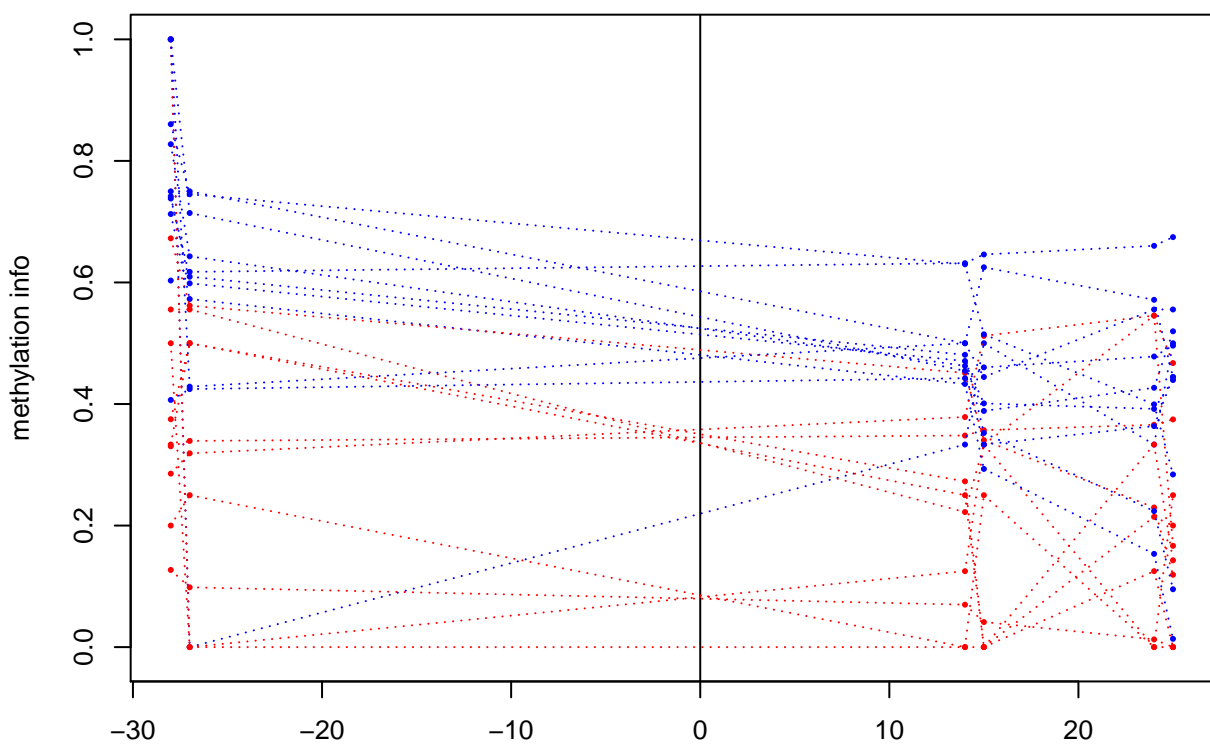

RNAseq logFC(UC-N)= 1.62

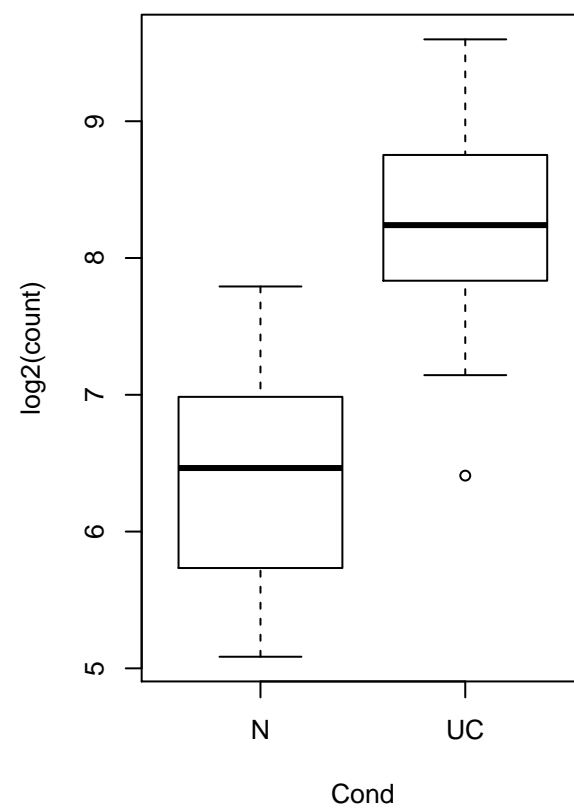

LINC00926 average UC-N %methylation max=-12.89% min=-37.59%

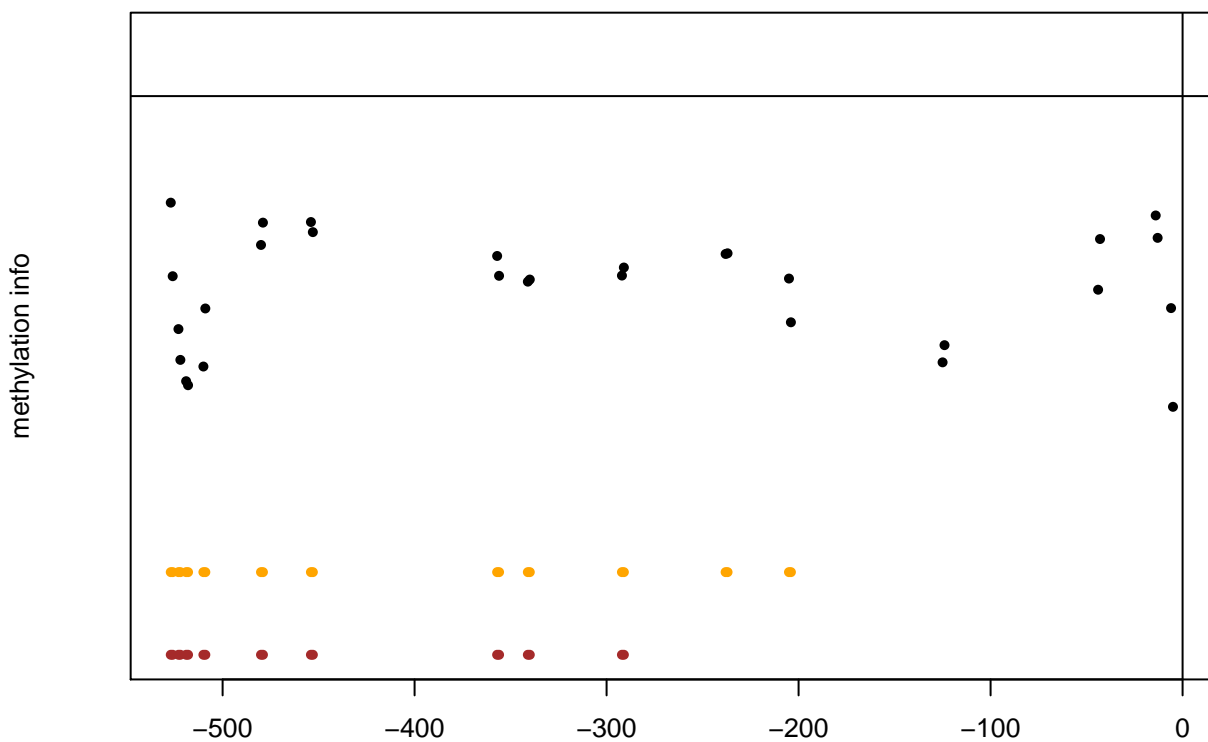

LINC00926 raw %methylation, red=UC, blue=Normal

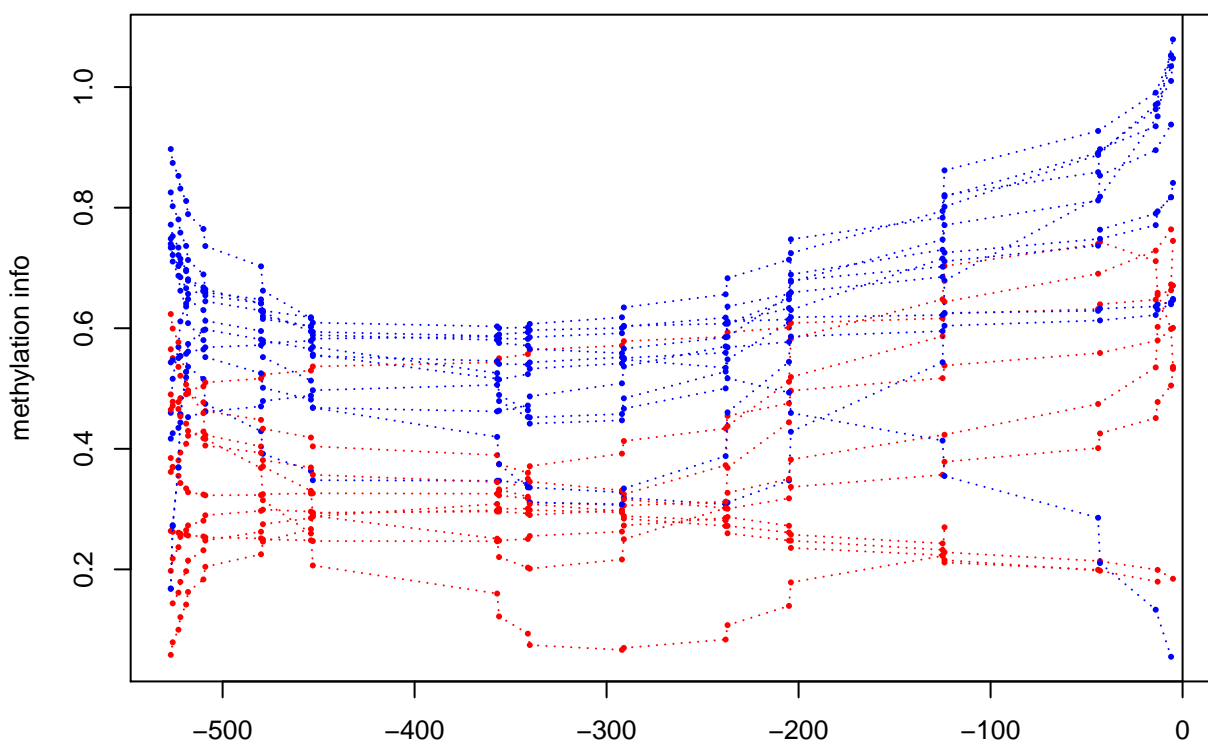

RNAseq logFC(UC-N)= 1.36

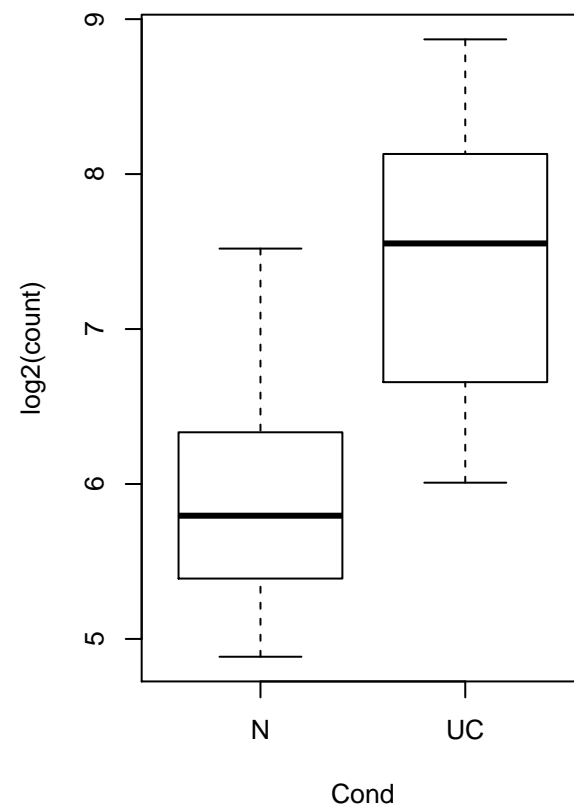

LMO2 average UC-N %methylation max=-13.4% min=-20.48%

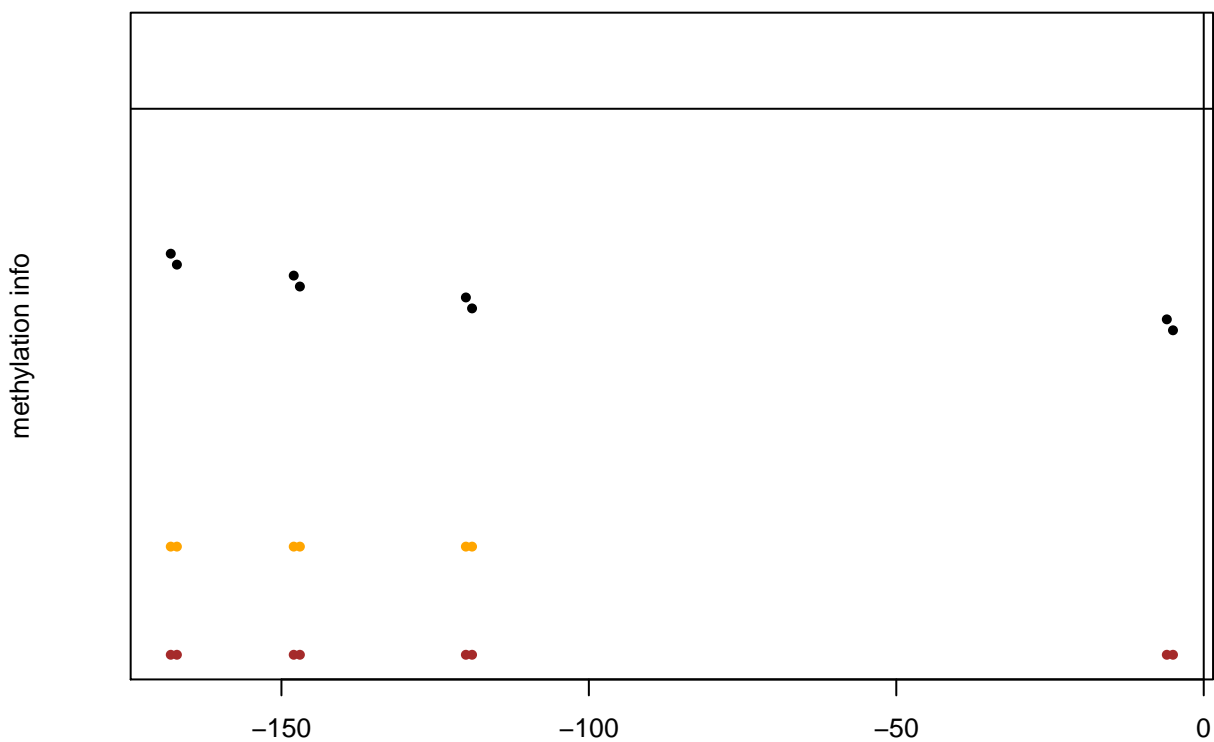

LMO2 raw %methylation, red=UC, blue=Normal

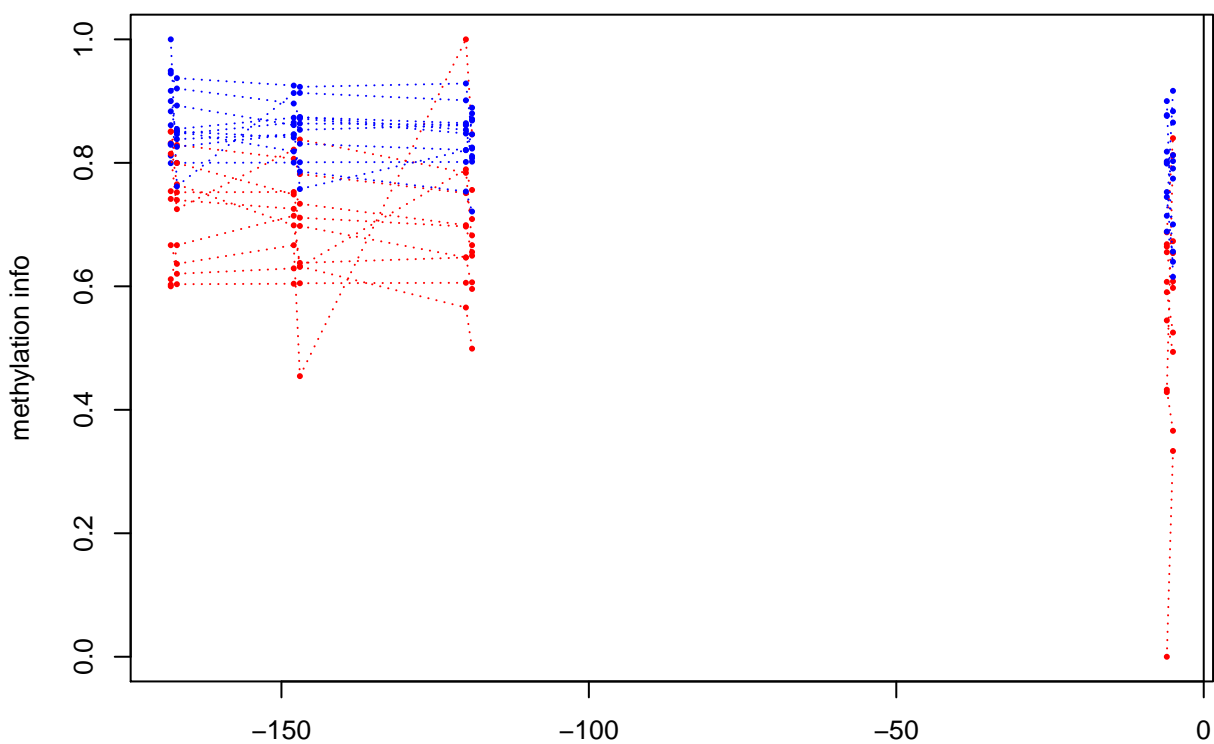

RNAseq logFC(UC-N)= 1.03

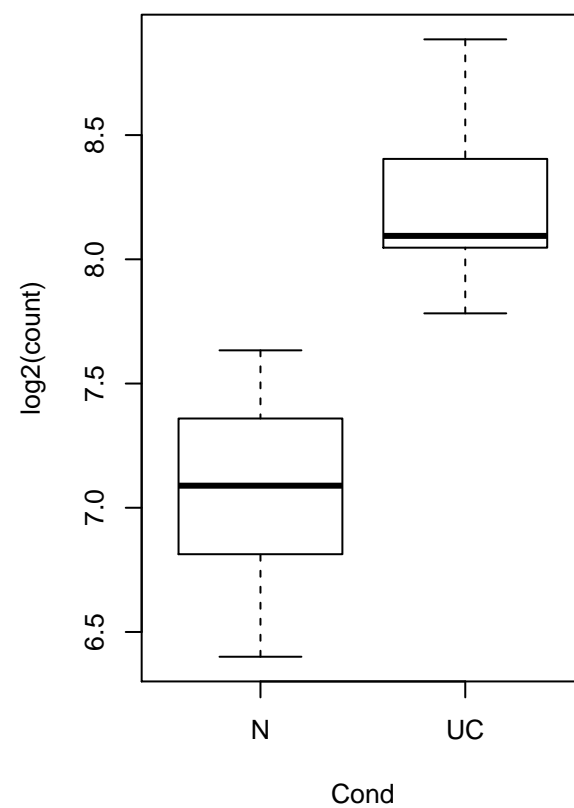

LRP1B average UC-N %methylation max=20.85% min=-1.96%

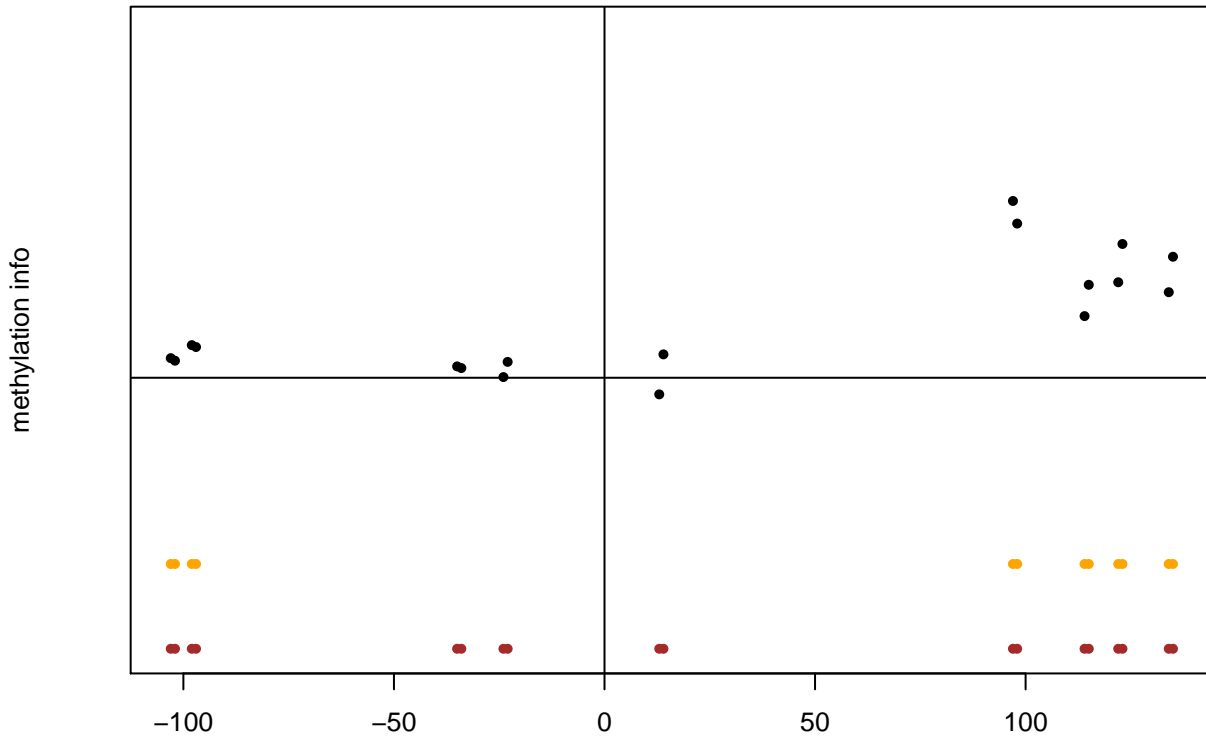

LRP1B raw %methylation, red=UC, blue=Normal

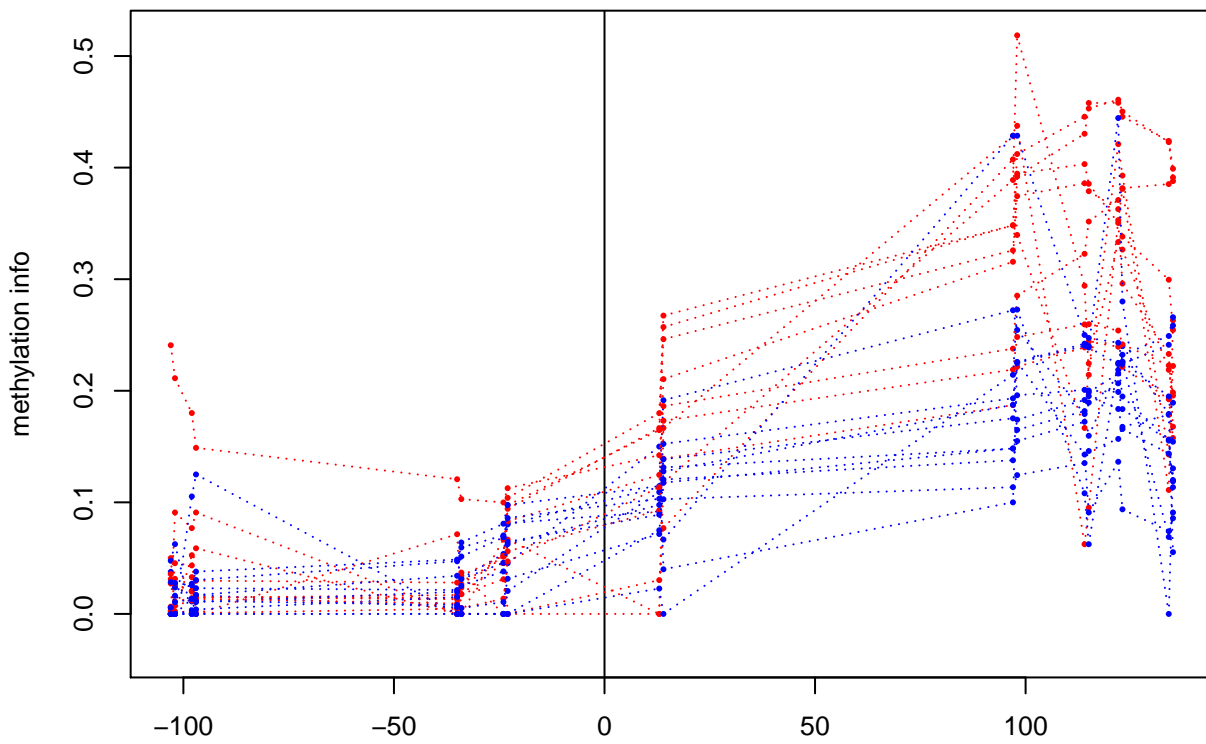

RNAseq logFC(UC-N)= -1.19

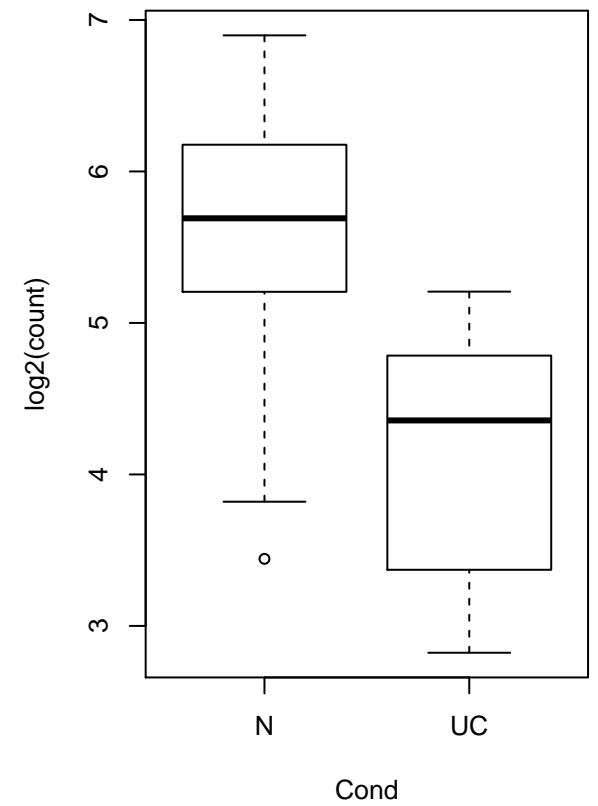

LTF average UC-N %methylation max=-13.45% min=-19.28%

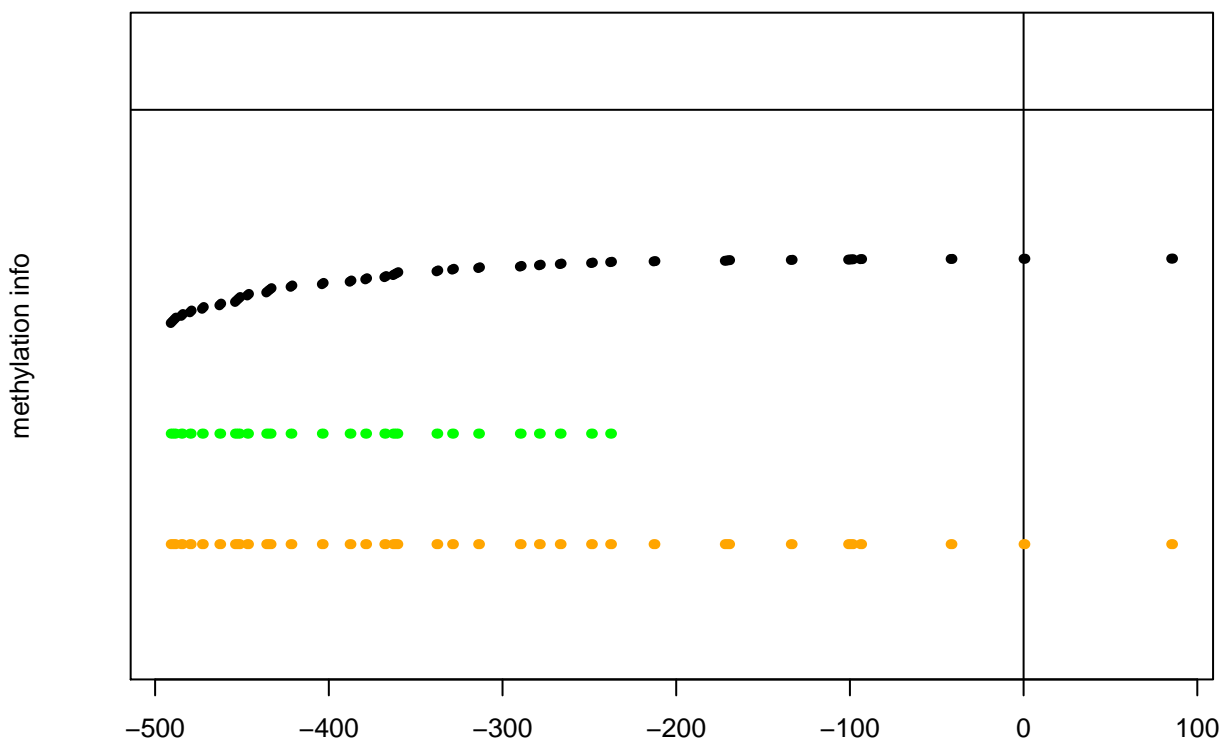

LTF raw %methylation, red=UC, blue=Normal

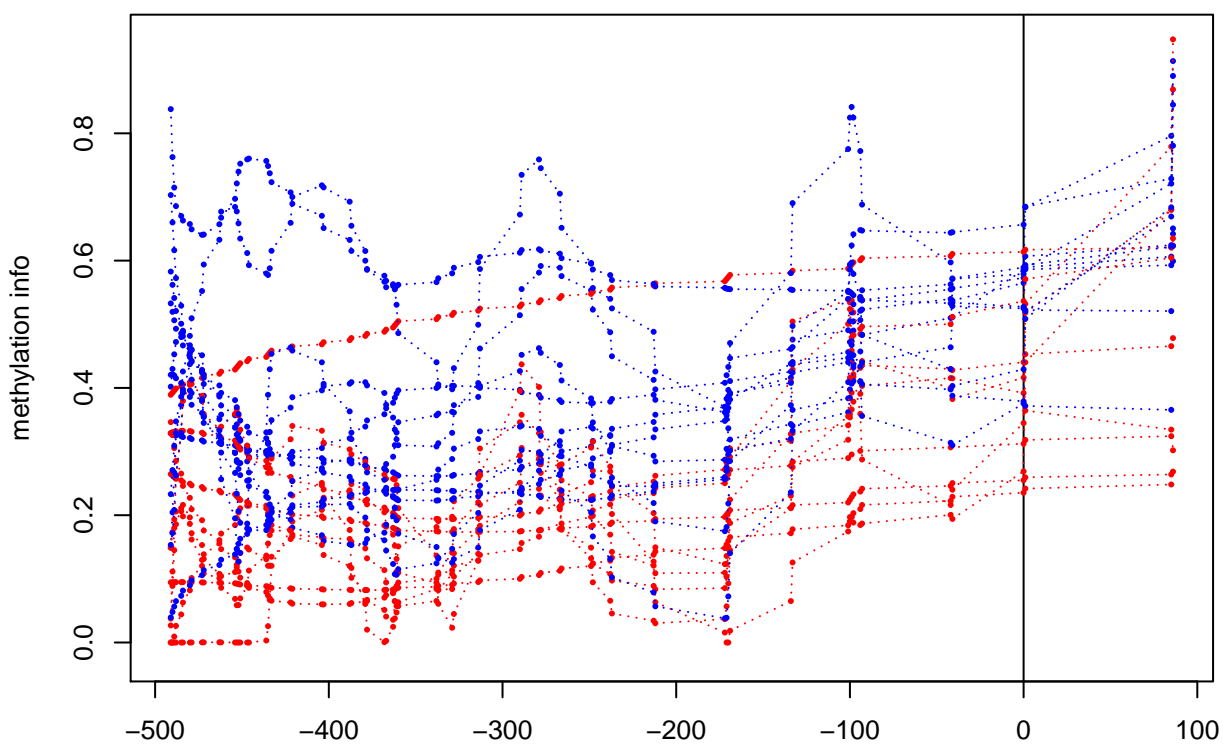

RNAseq logFC(UC-N)= 2.42

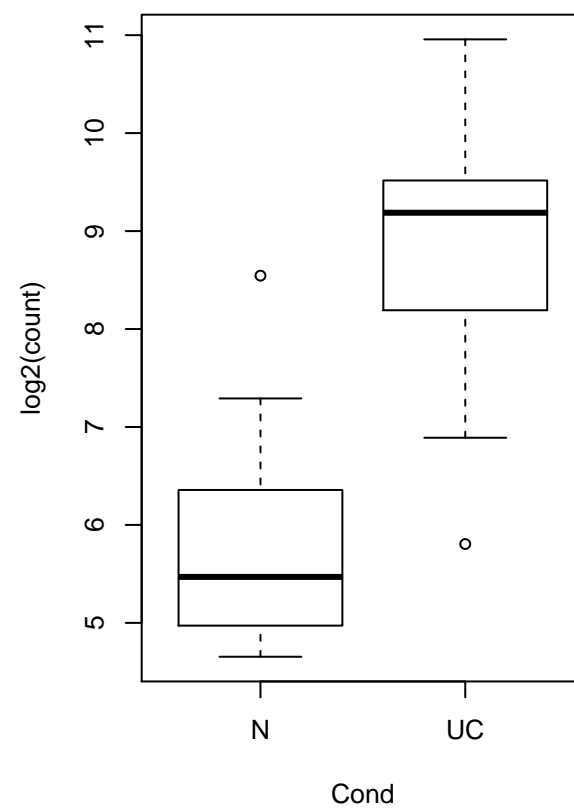

LYPD5 average UC-N %methylation max=2.06% min=-16.88%

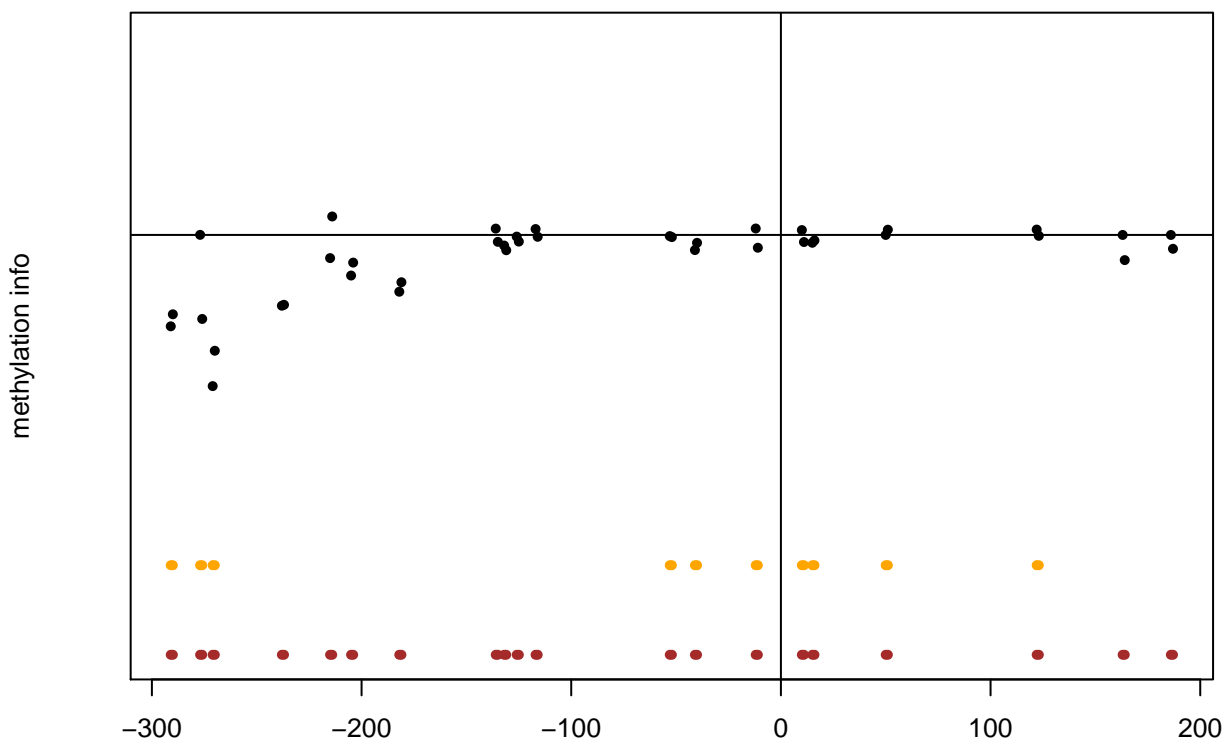

LYPD5 raw %methylation, red=UC, blue=Normal

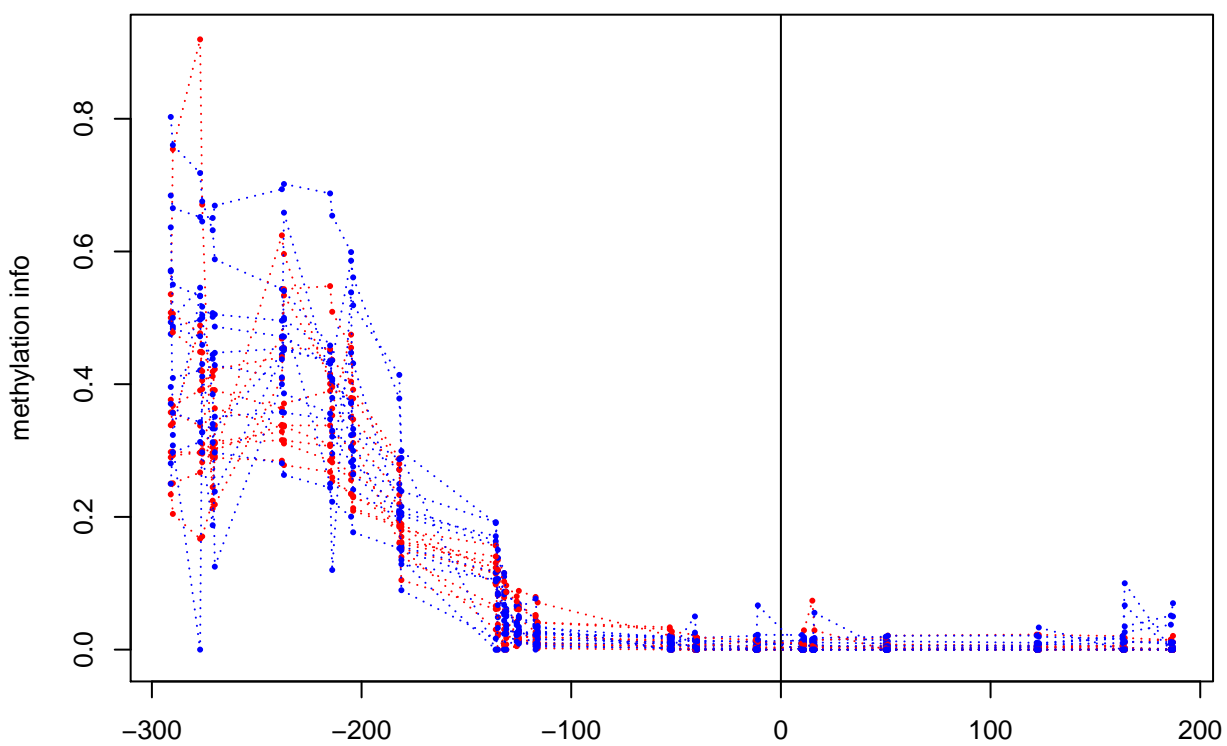

RNAseq logFC(UC-N)= 3.07

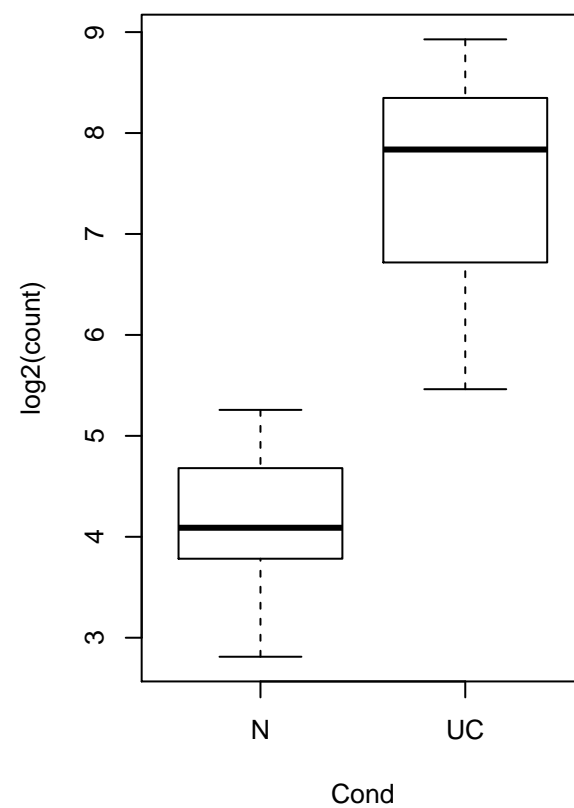

MAB21L3 average UC-N %methylation max=52.67% min=-1.7%

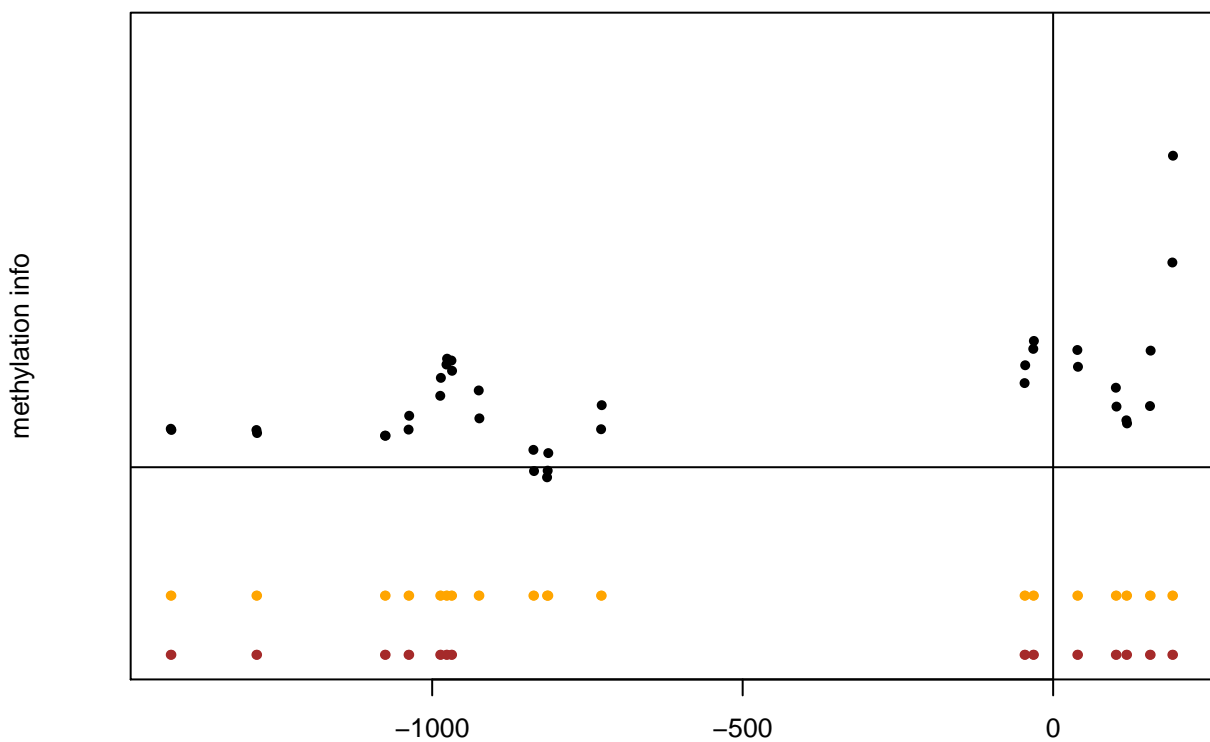

MAB21L3 raw %methylation, red=UC, blue=Normal

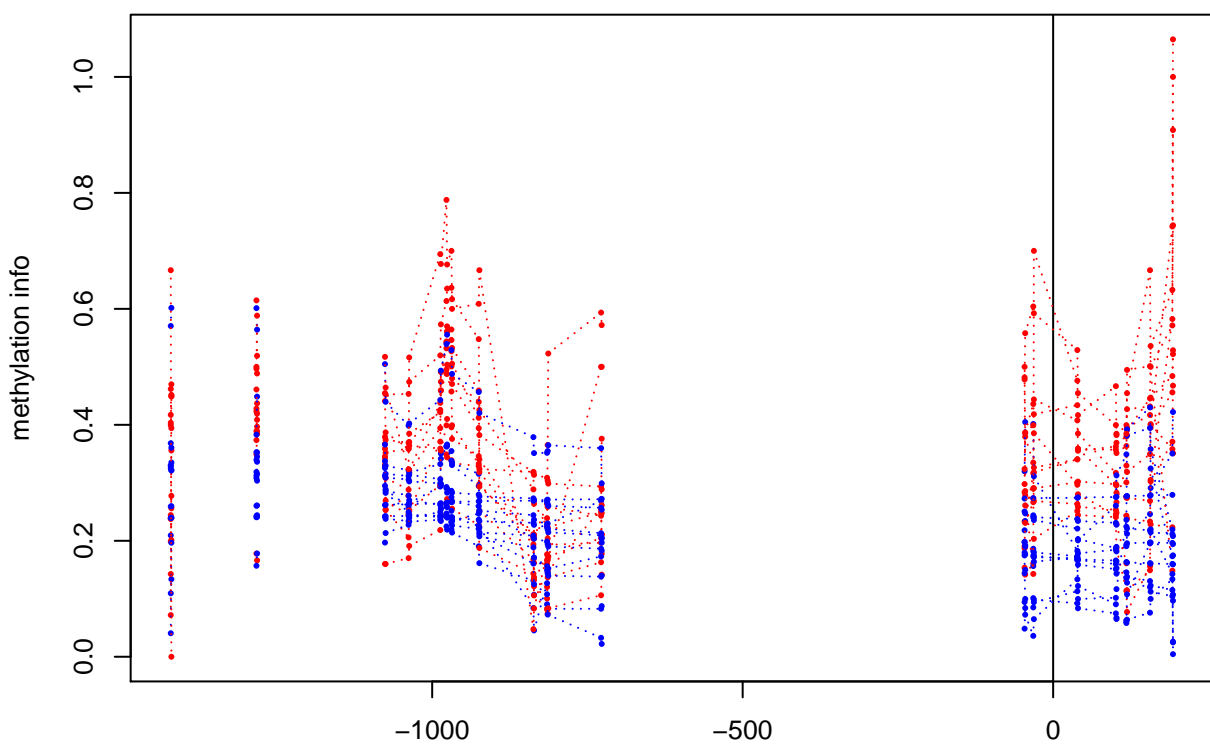

RNAseq logFC(UC-N) = -1.09

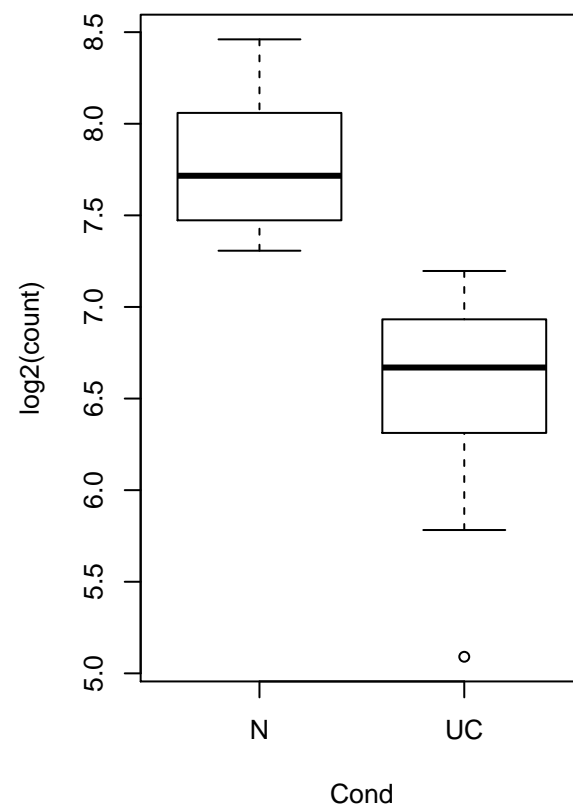



MAP4K1 average UC-N %methylation max=0.63% min=-34.66%

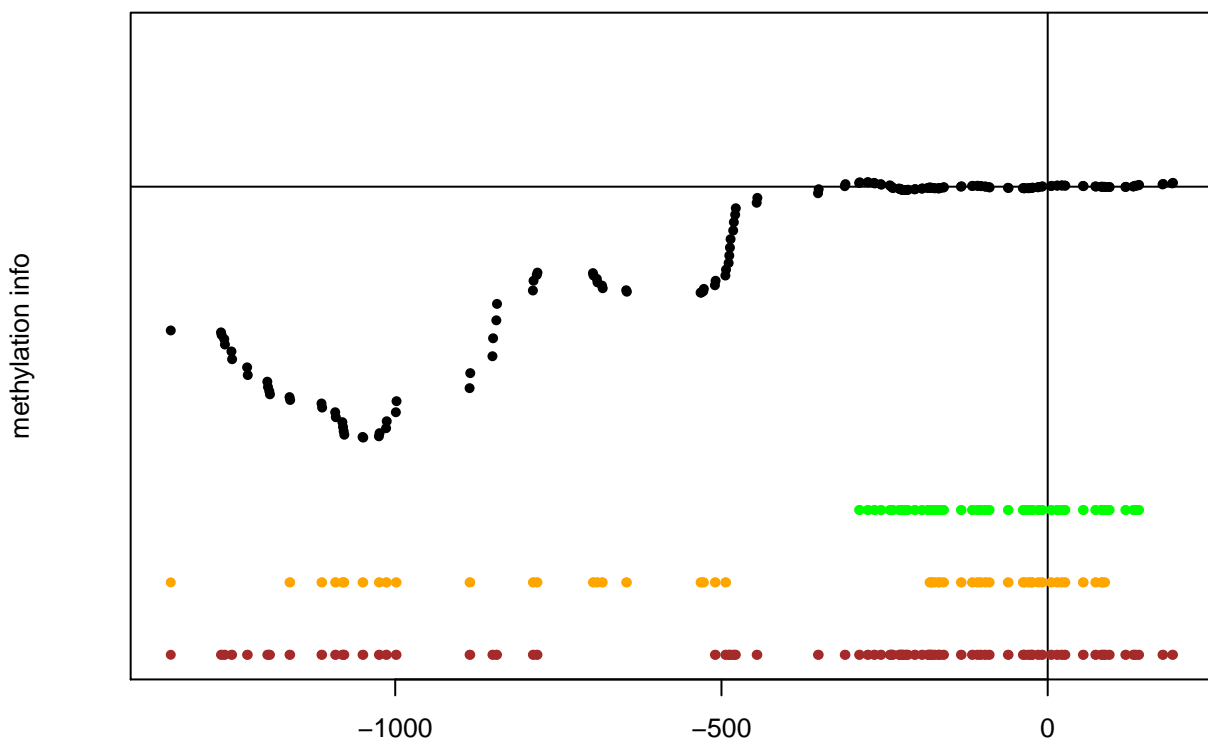

MAP4K1 raw %methylation, red=UC, blue=Normal

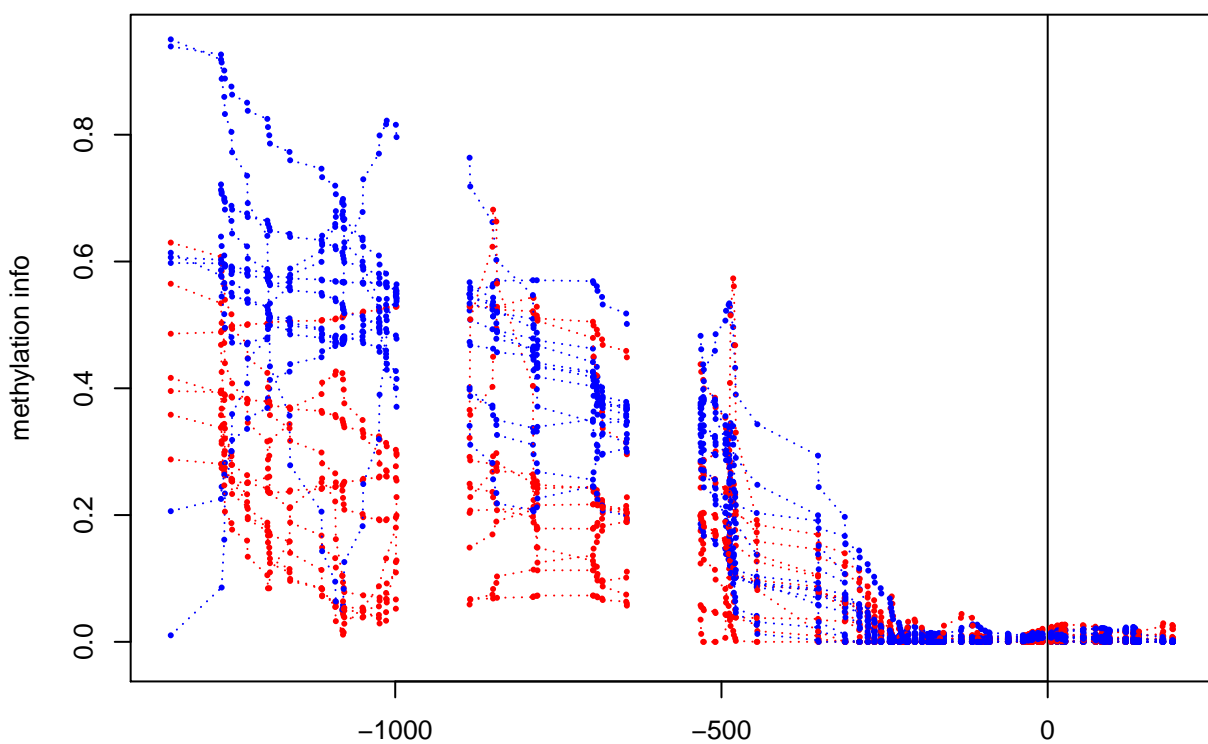

RNAseq logFC(UC-N)= 1.51

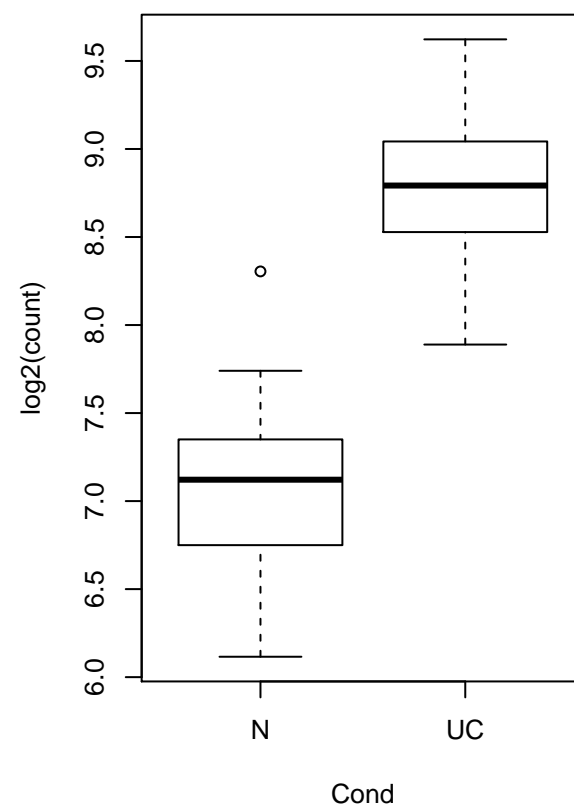

MB21D1 average UC-N %methylation max=1.26% min=-27.18%

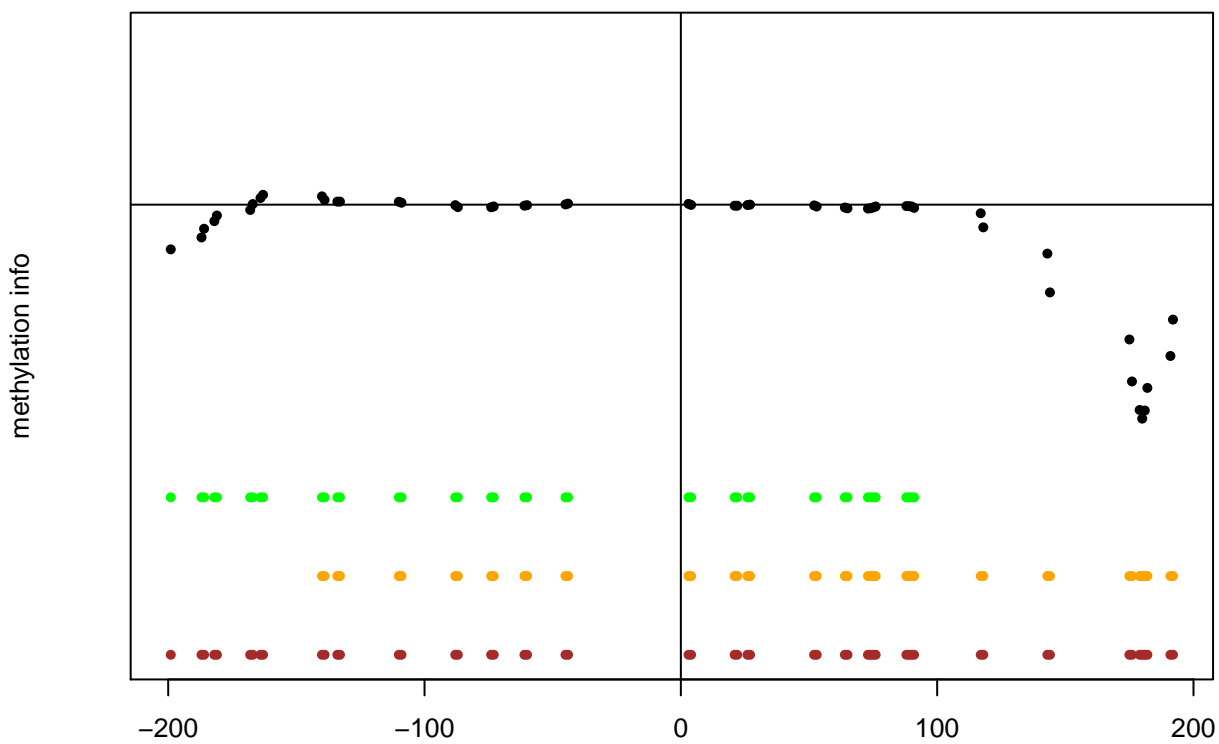

MB21D1 raw %methylation, red=UC, blue=Normal

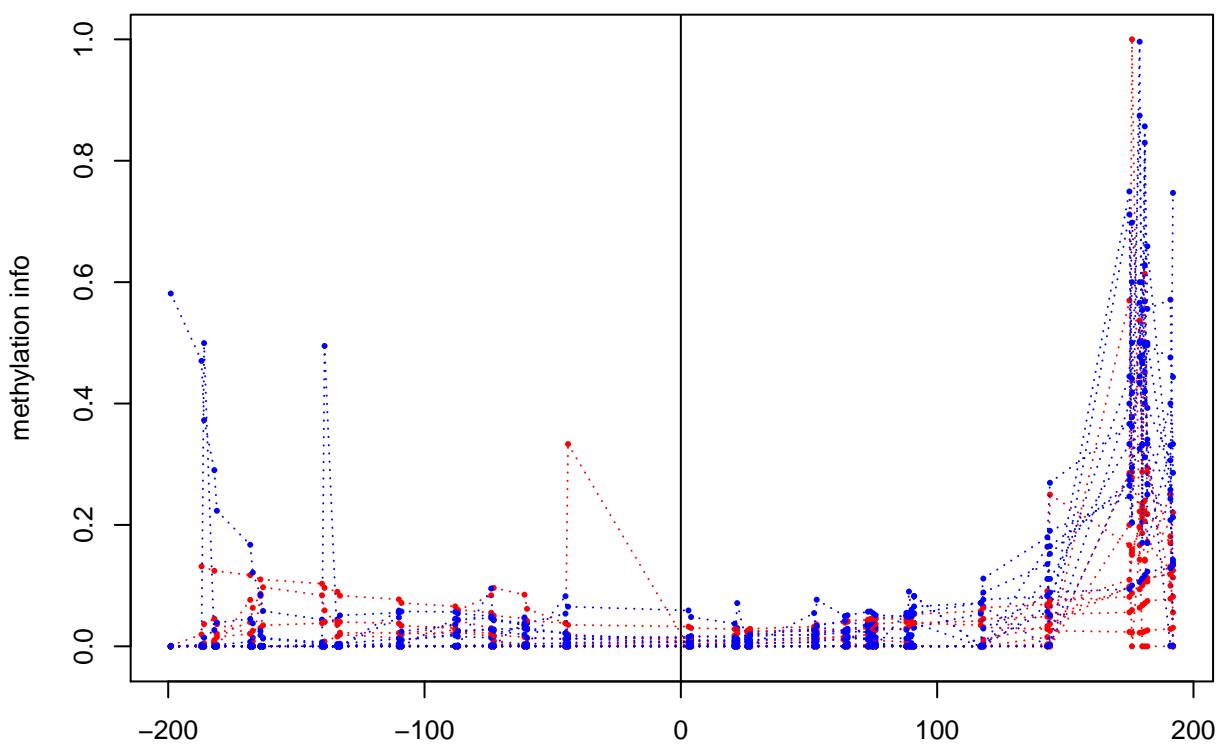

RNAseq logFC(UC-N)= 1.11

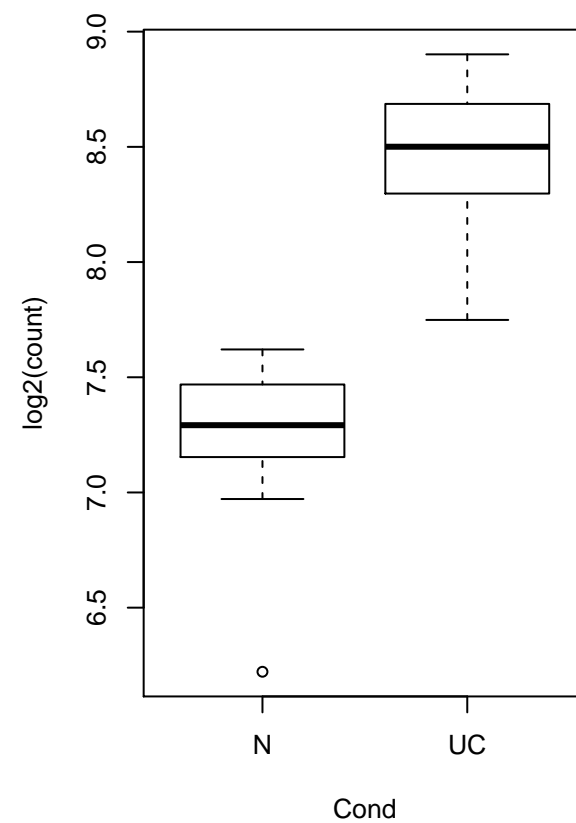

MEFV average UC-N %methylation max=0.79% min=-15.12%

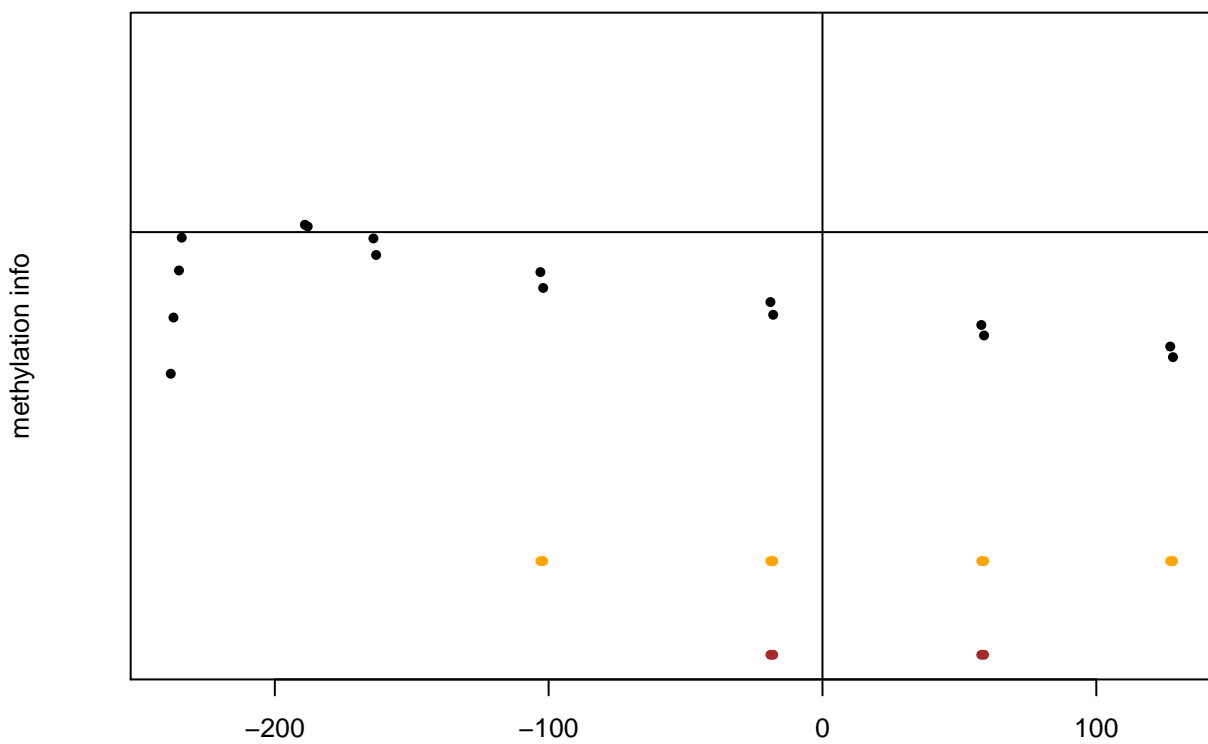

MEFV raw %methylation, red=UC, blue=Normal

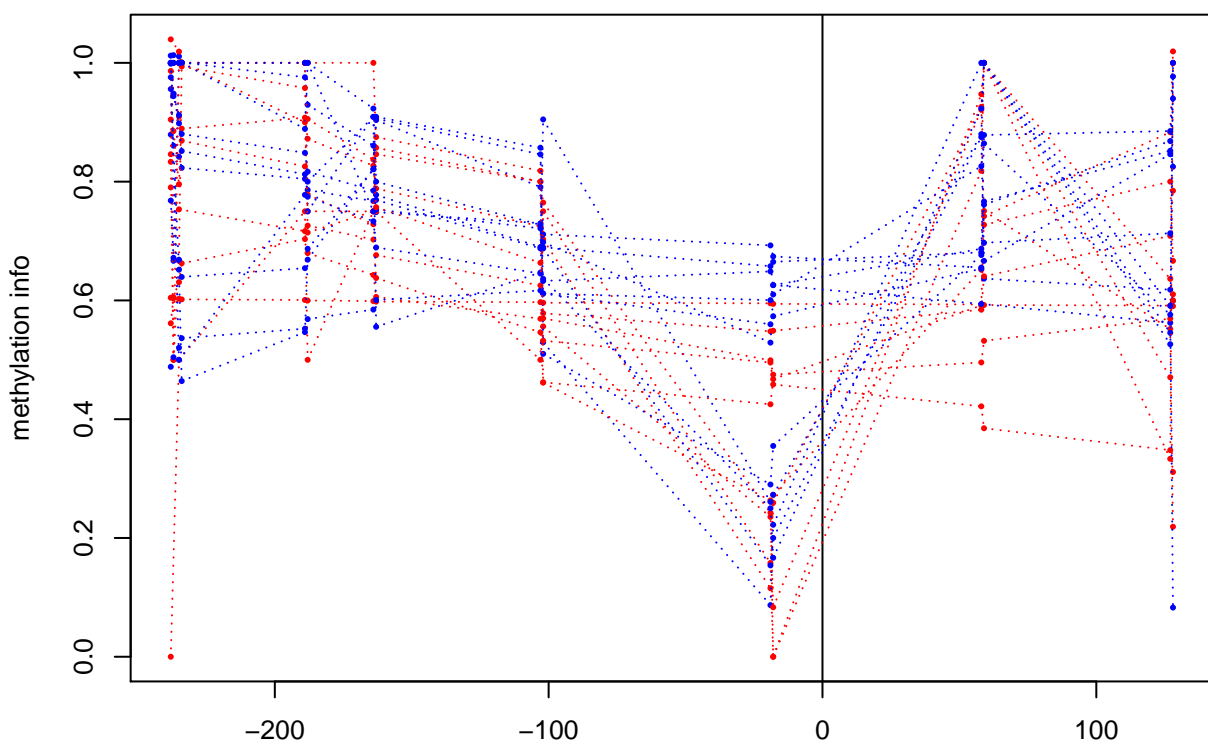

RNAseq logFC(UC-N)= 1.77

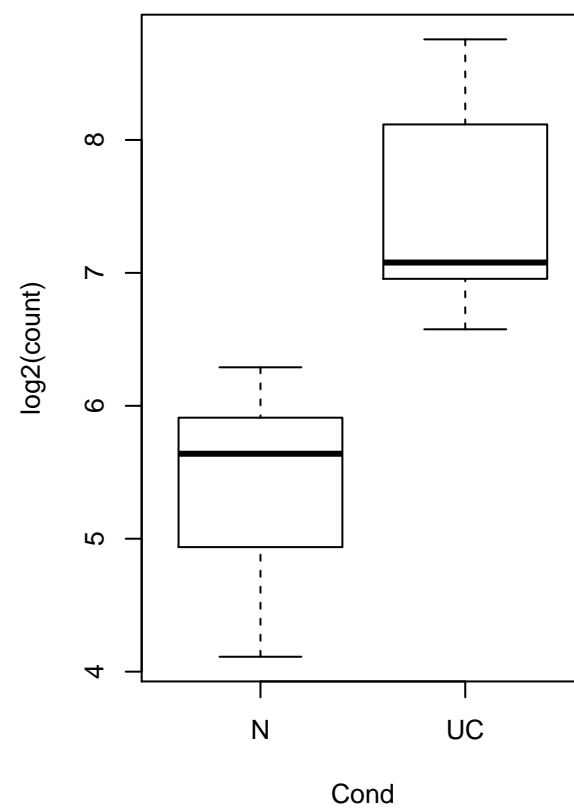

MEOX1 average UC-N %methylation max=-12.72% min=-20.63%

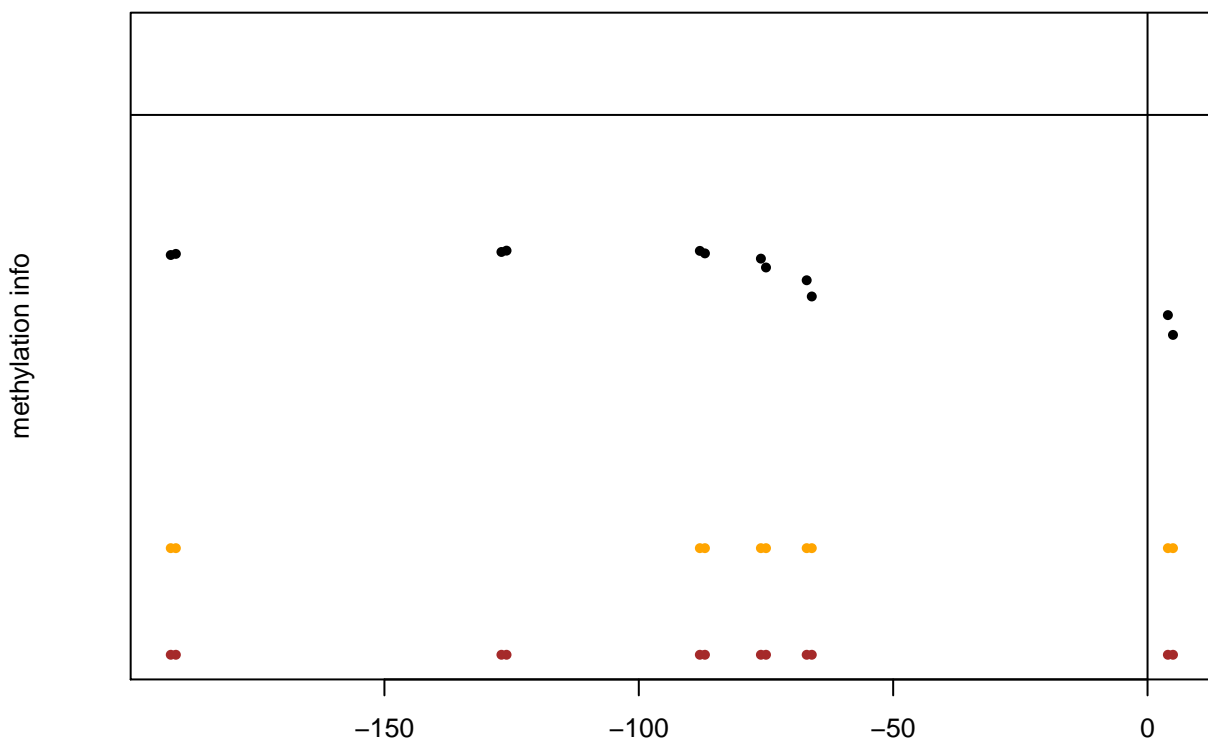

MEOX1 raw %methylation, red=UC, blue=Normal

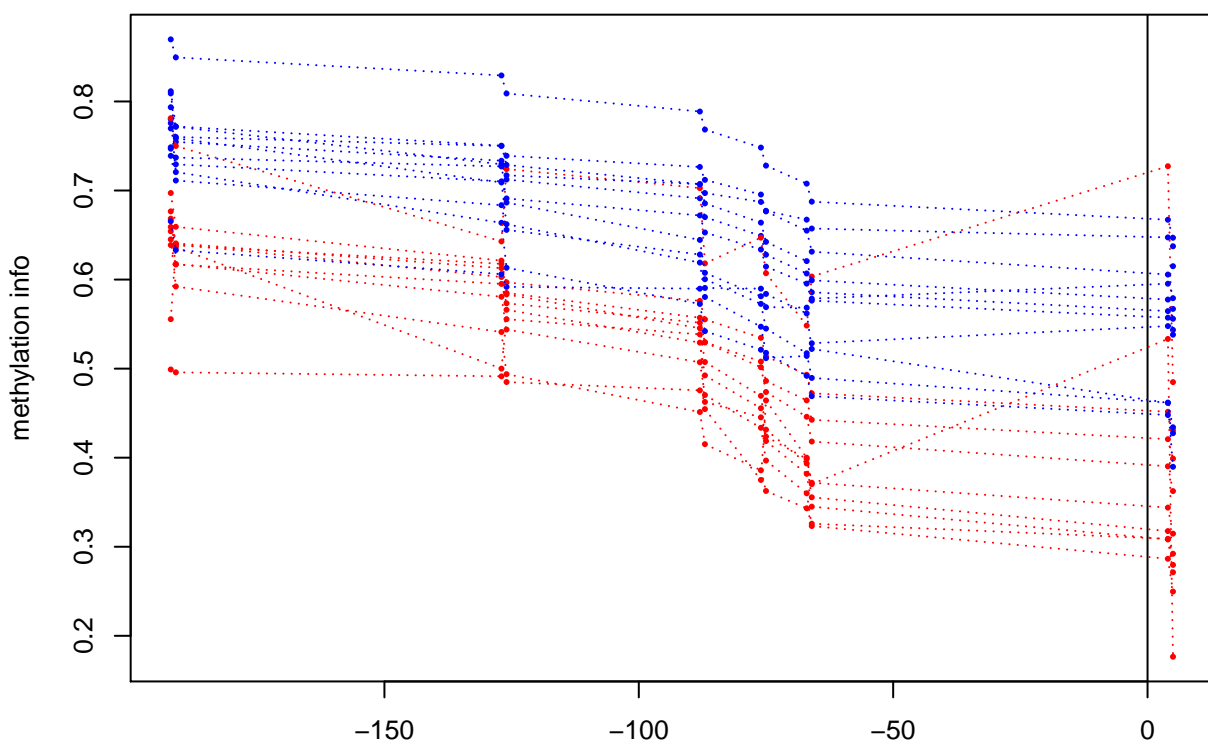

RNAseq logFC(UC-N)= 1.9

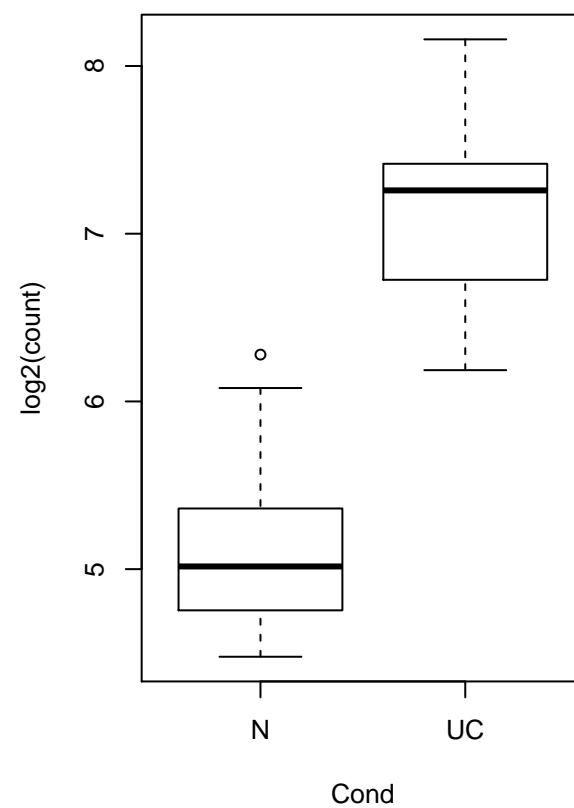

MEP1A average UC-N %methylation max=40.48% min=-6.11%

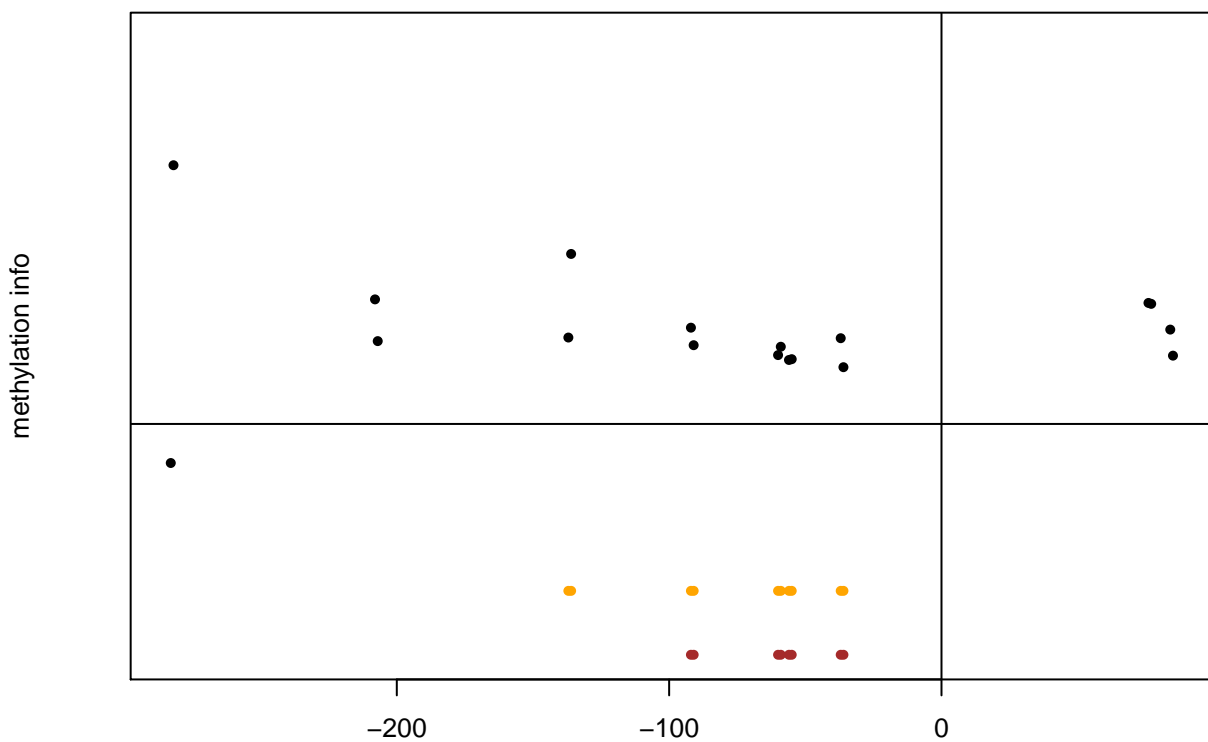

MEP1A raw %methylation, red=UC, blue=Normal

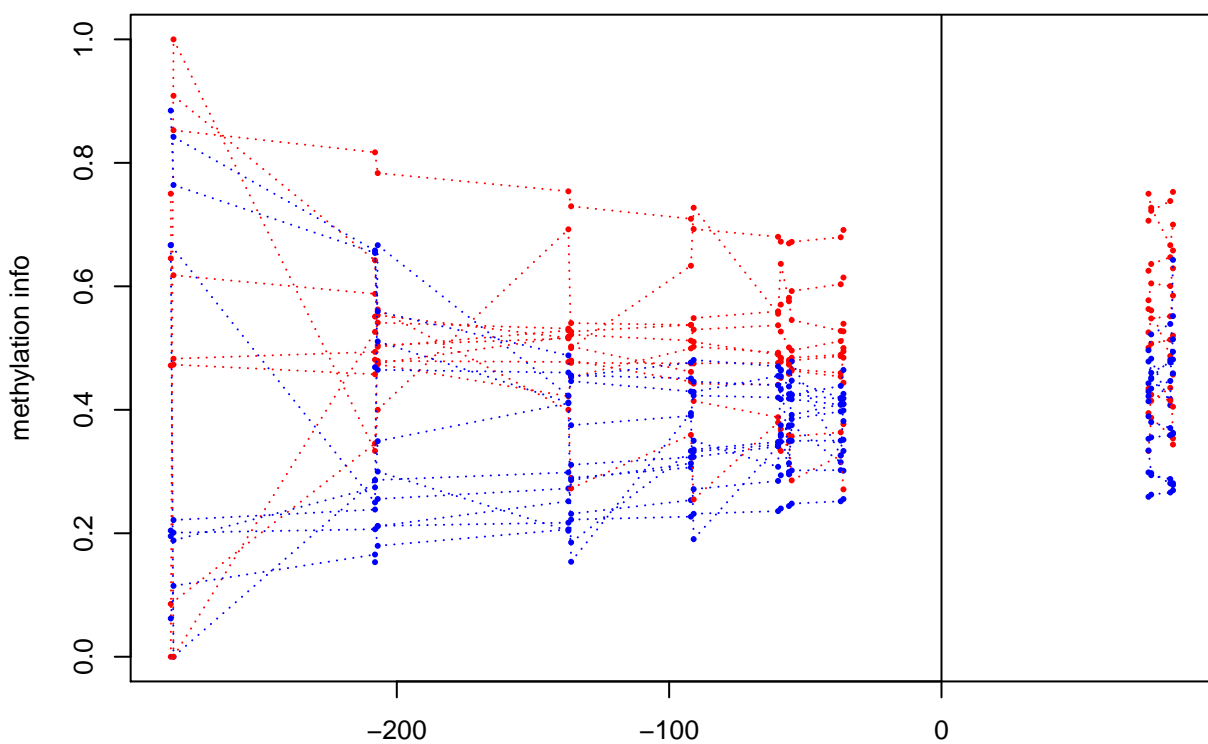

RNAseq logFC(UC-N)= -2.15

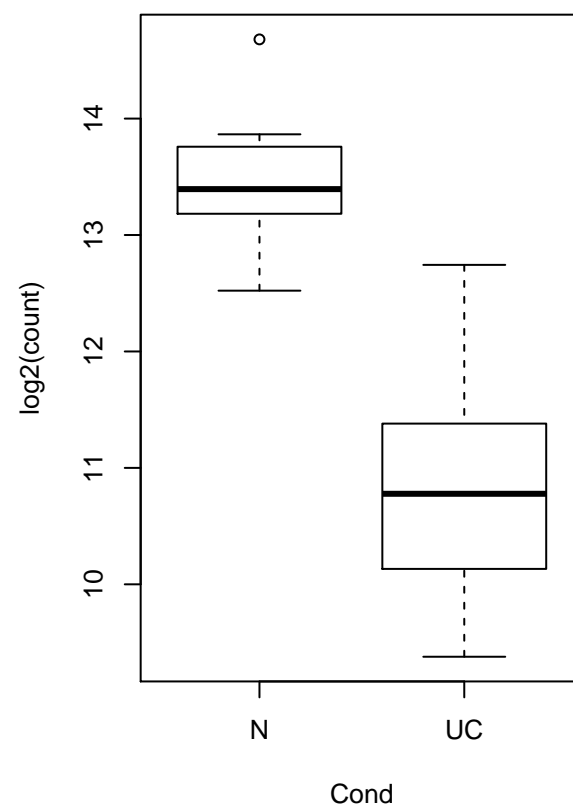

**METTL7B average UC-N %methylation max=4.83% min=-23.07%**

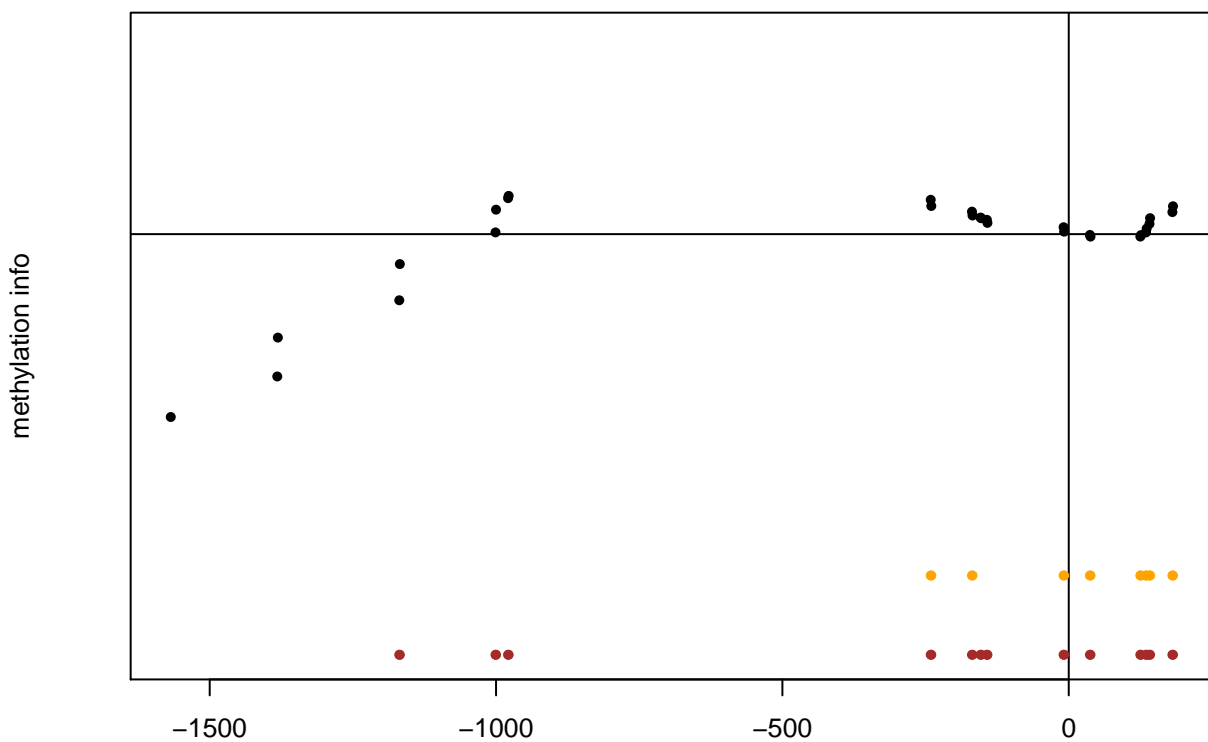

**METTL7B raw %methylation, red=UC, blue=Normal**

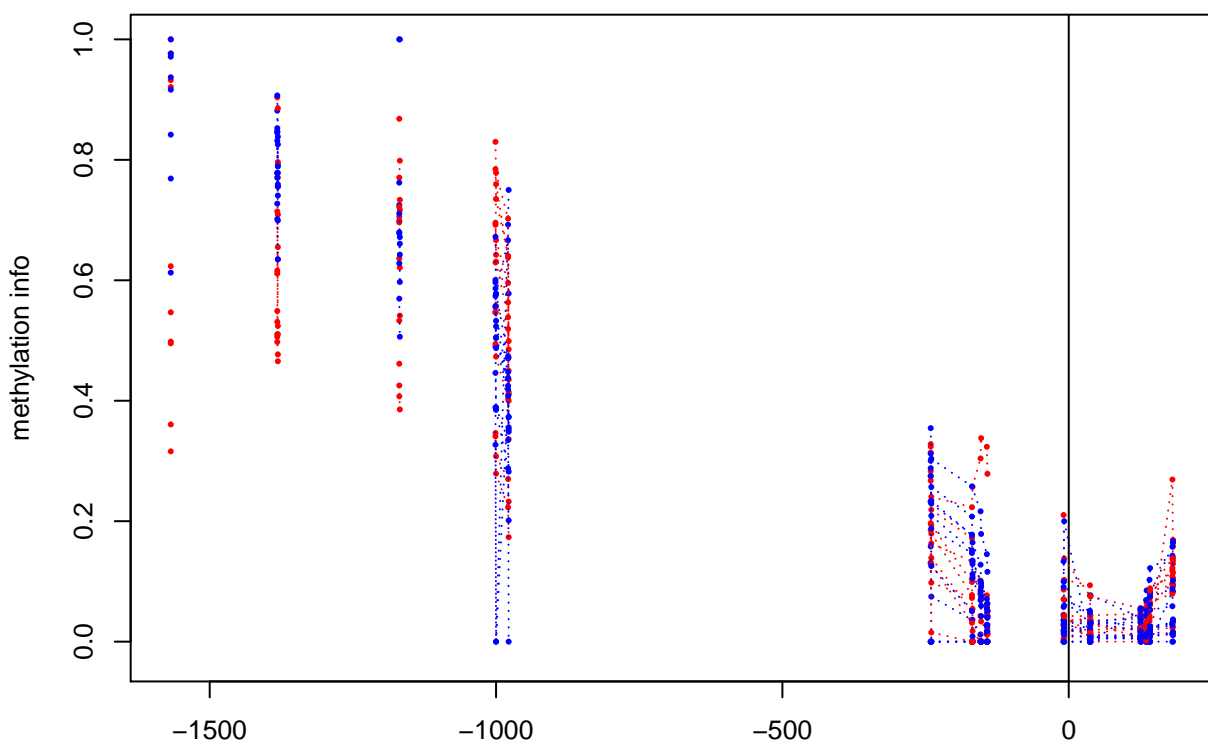

**RNAseq logFC(UC-N)= -1.04**

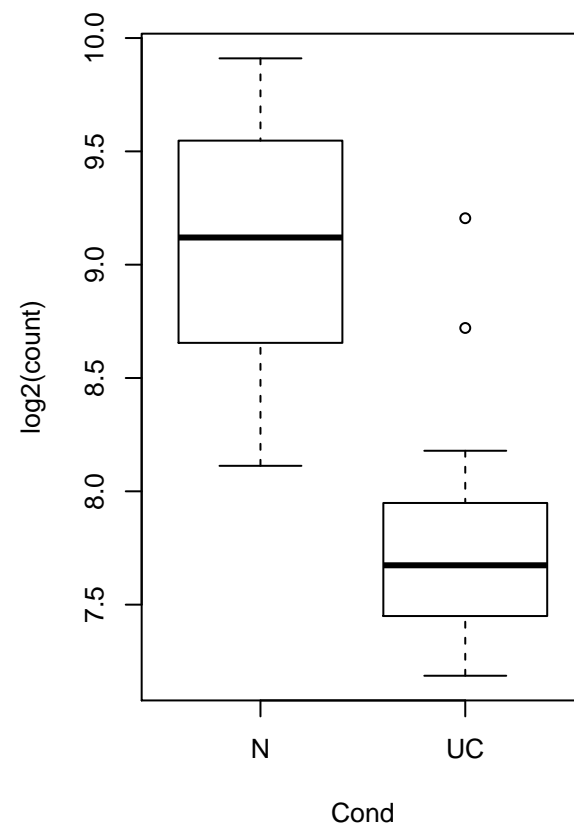

MIR155HG average UC-N %methylation max=1.08% min=-16.66%

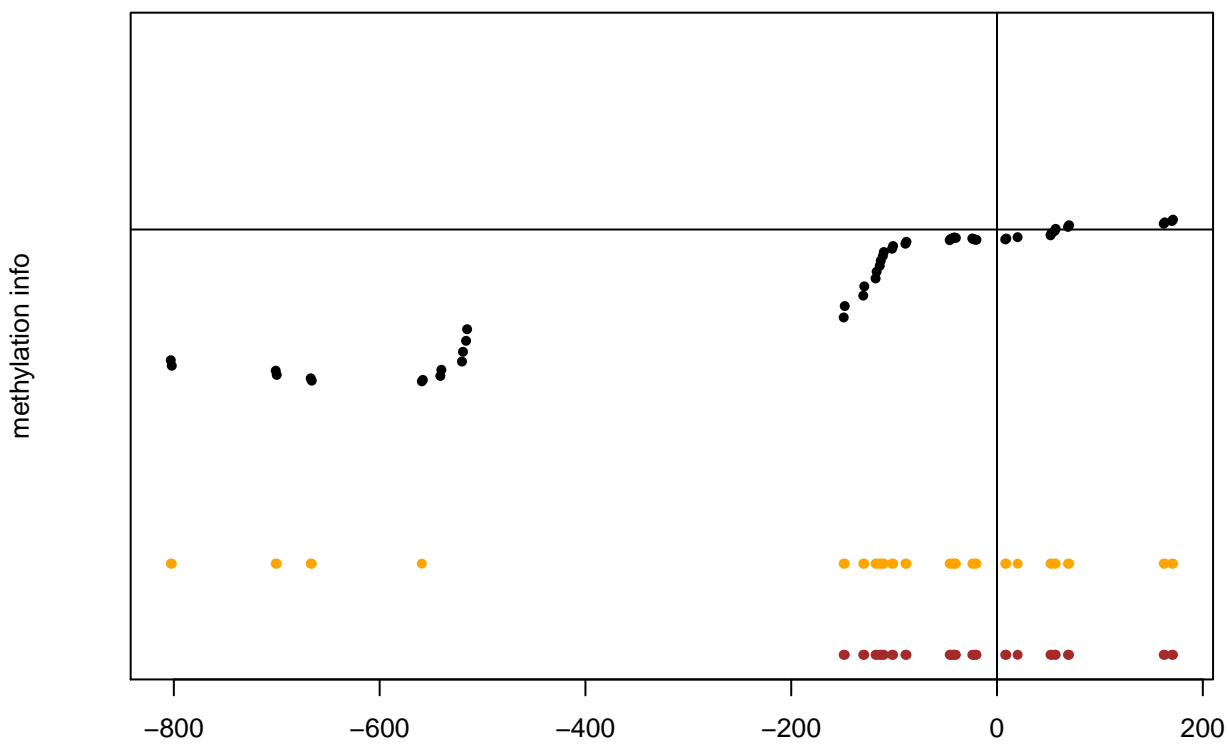

MIR155HG raw %methylation, red=UC, blue=Normal

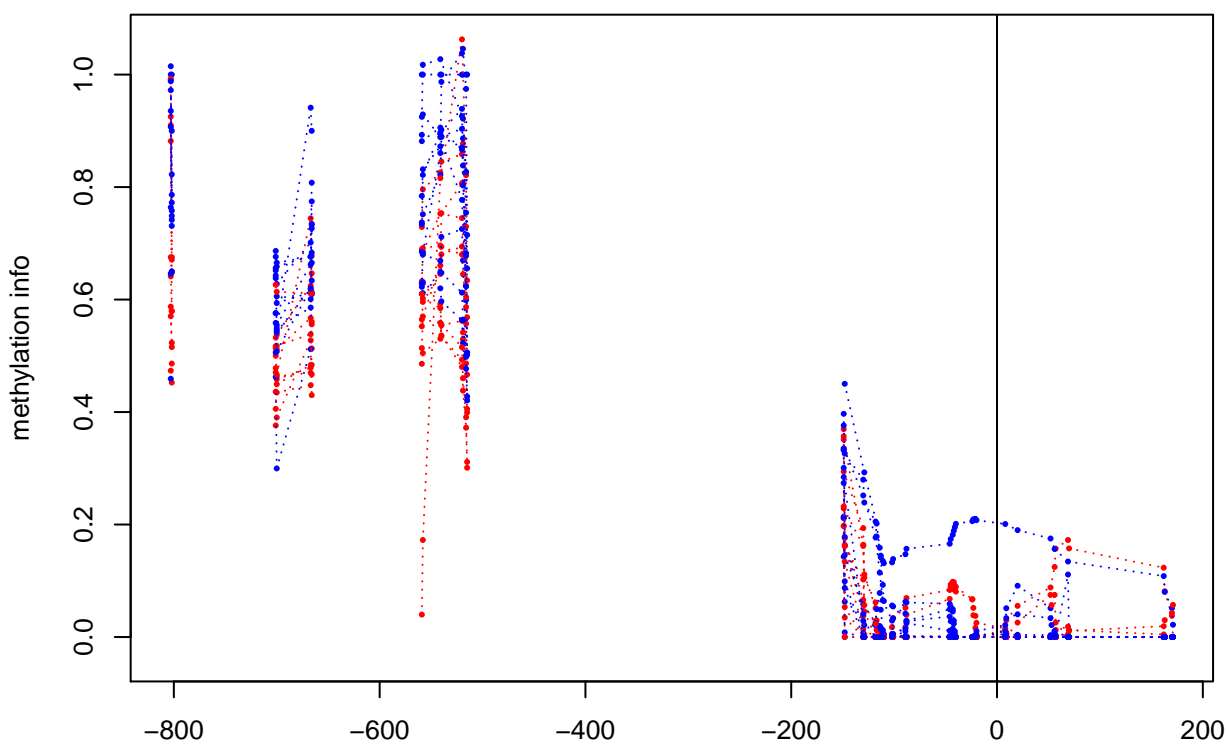

RNAseq logFC(UC-N)= 1.56

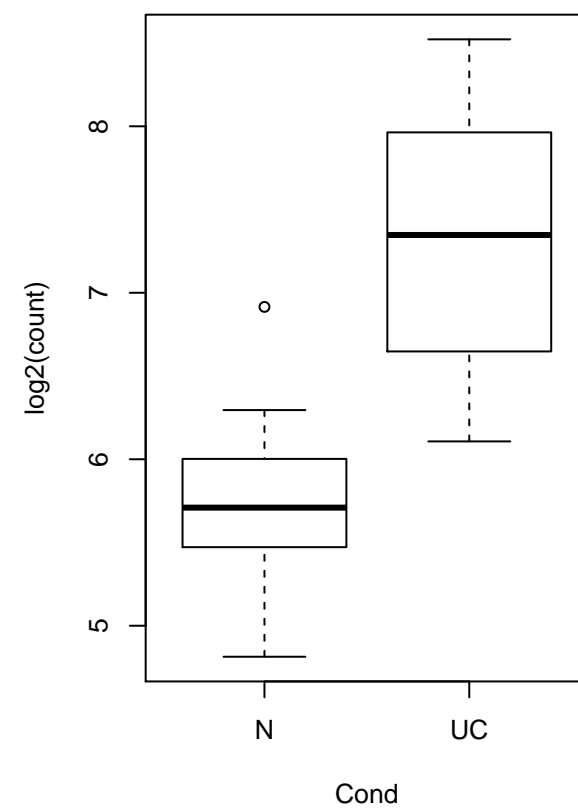

MME average UC-N %methylation max=-0.67% min=-37.5%

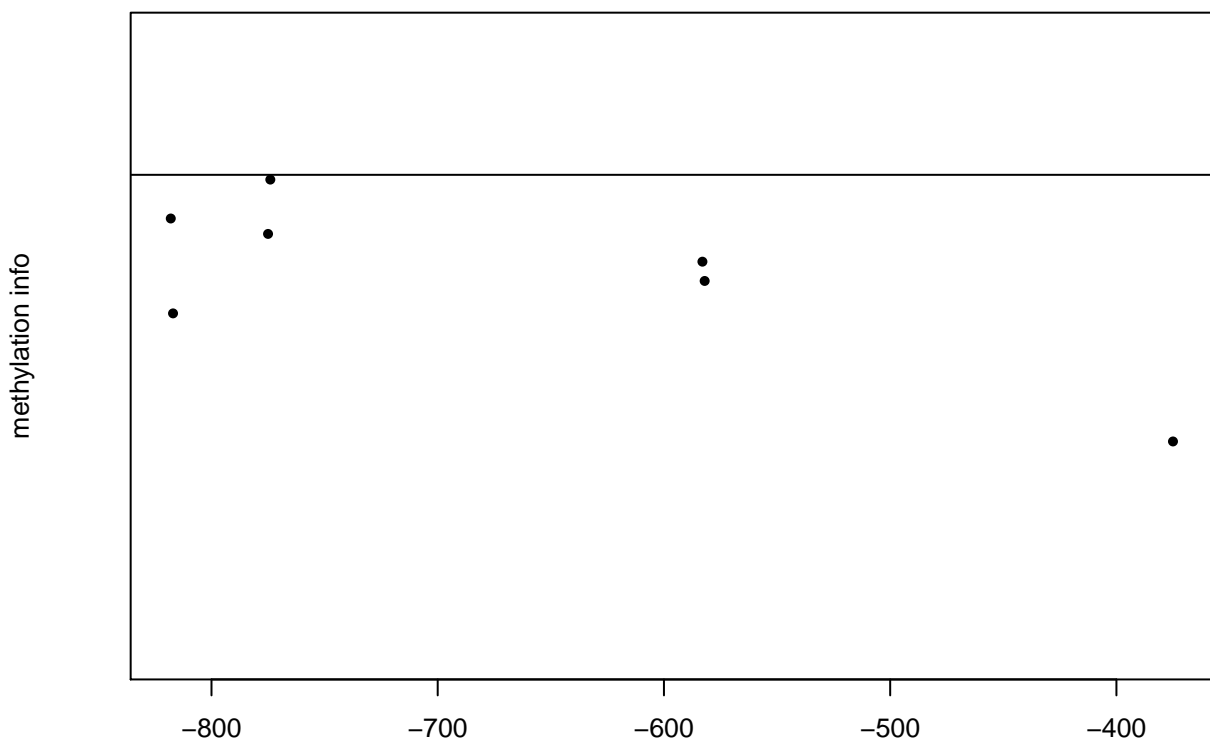

MME raw %methylation, red=UC, blue=Normal

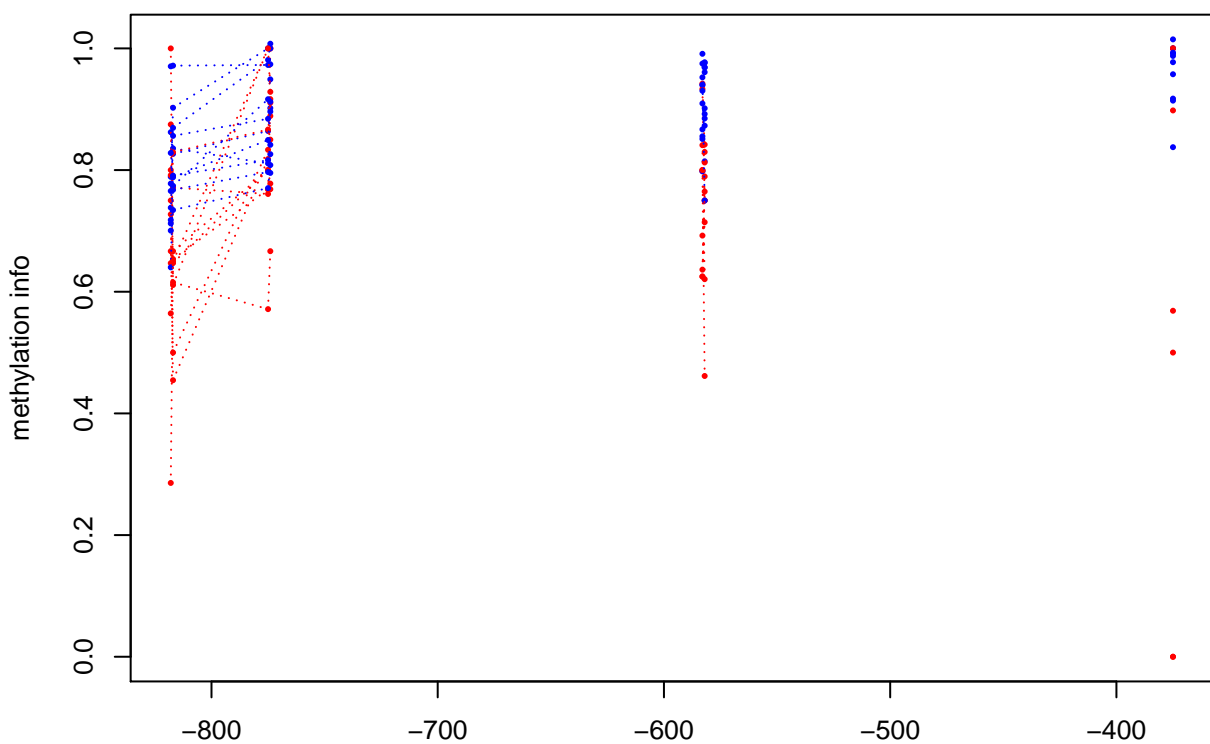

RNAseq logFC(UC-N)= 1.09

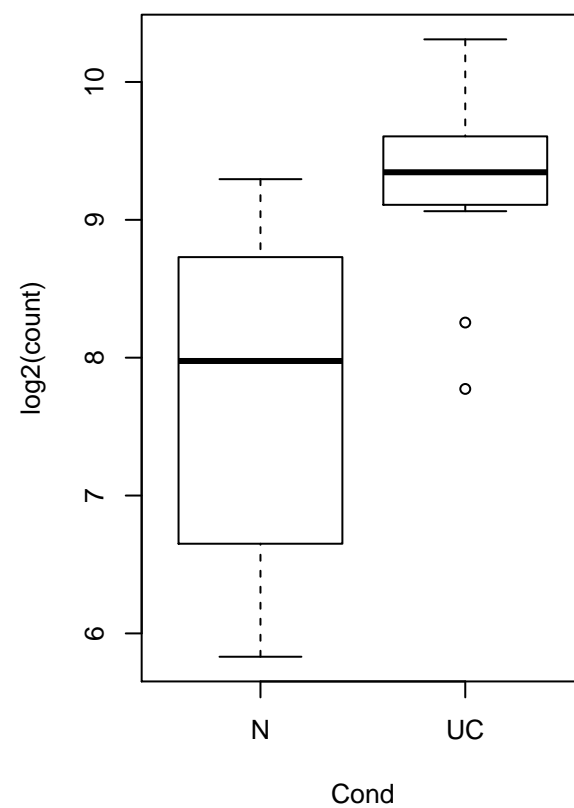



MOCS1 average UC-N %methylation max=12.96% min=-10.29%

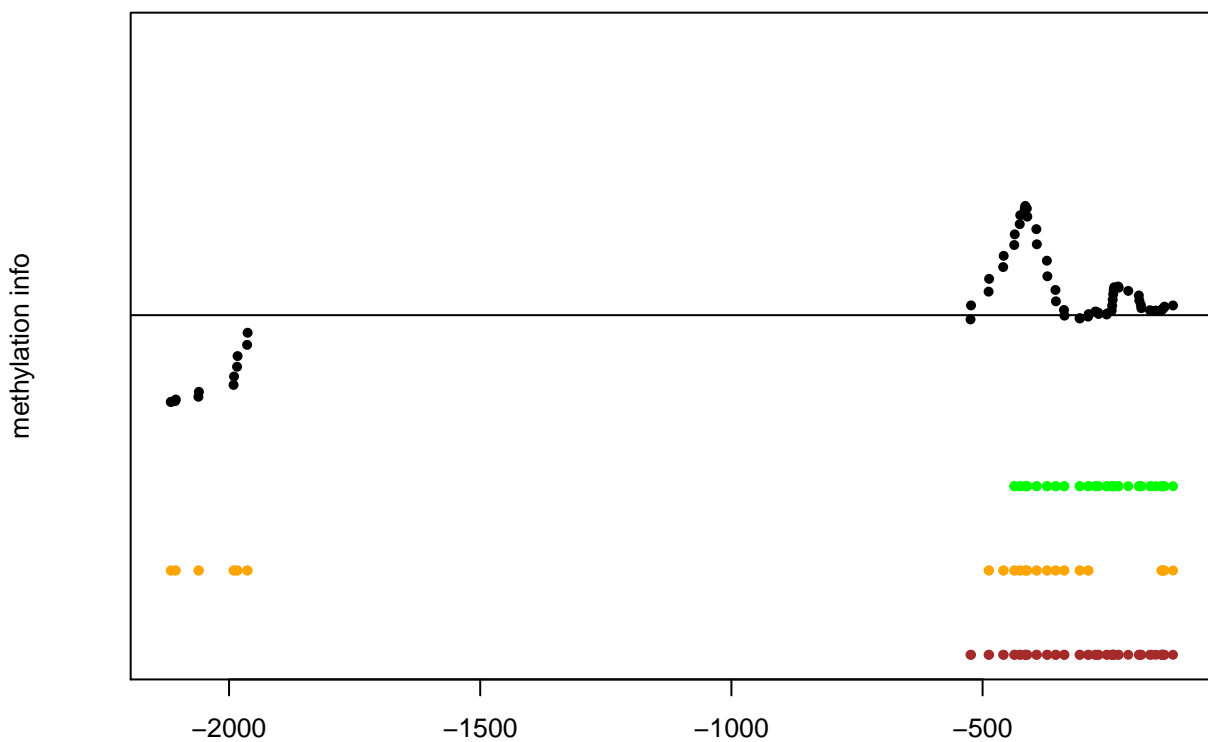

MOCS1 raw %methylation, red=UC, blue=Normal

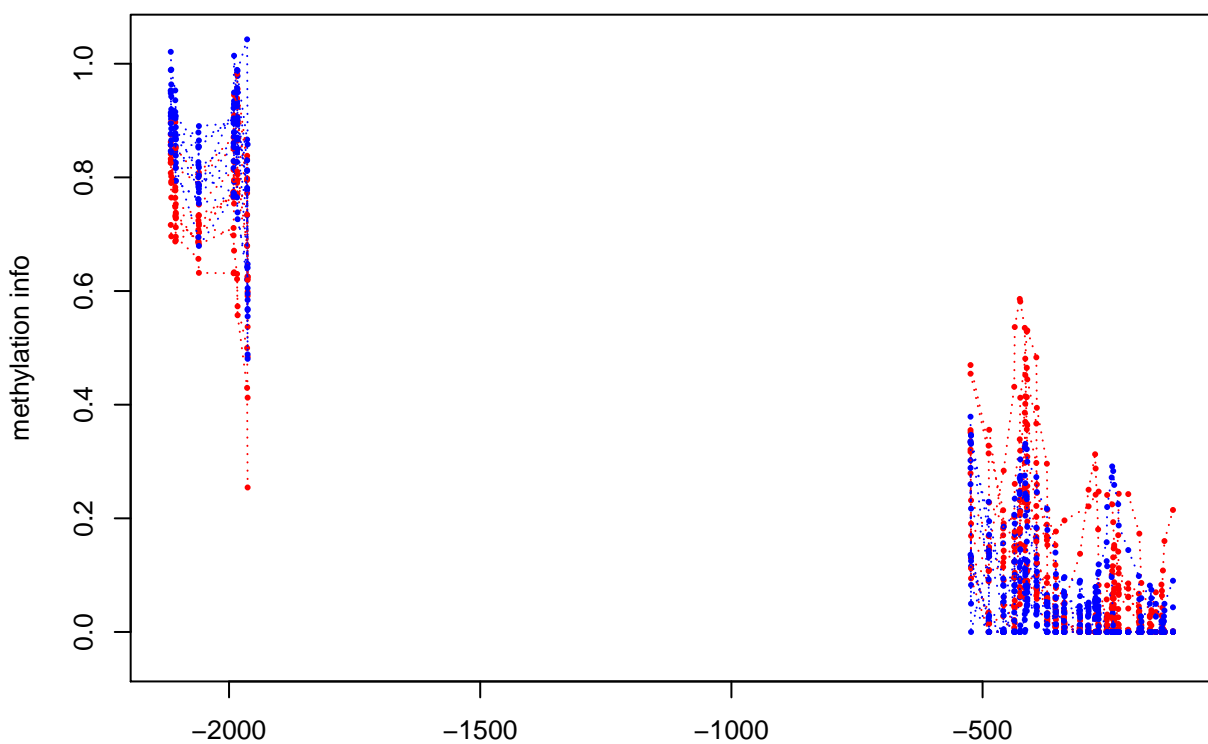

RNAseq logFC(UC-N)= -1.27

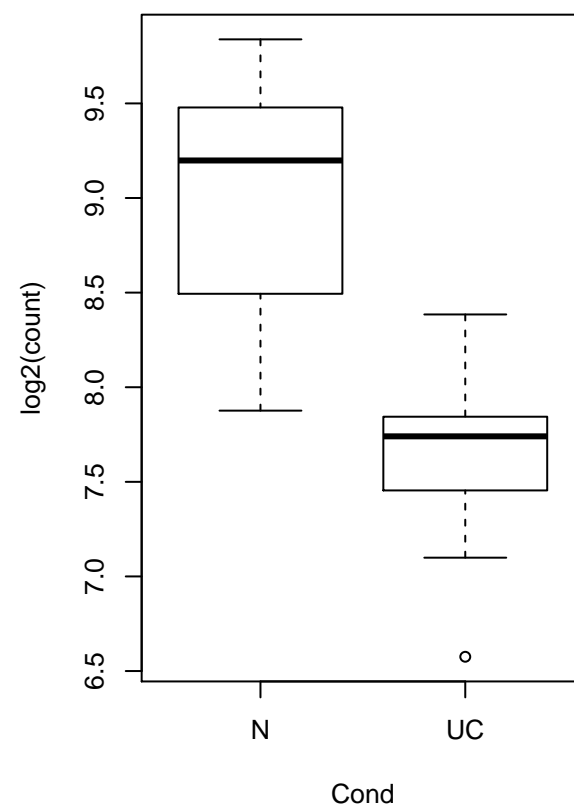

MS4A1 average UC-N %methylation max=-17.51% min=-20.03%

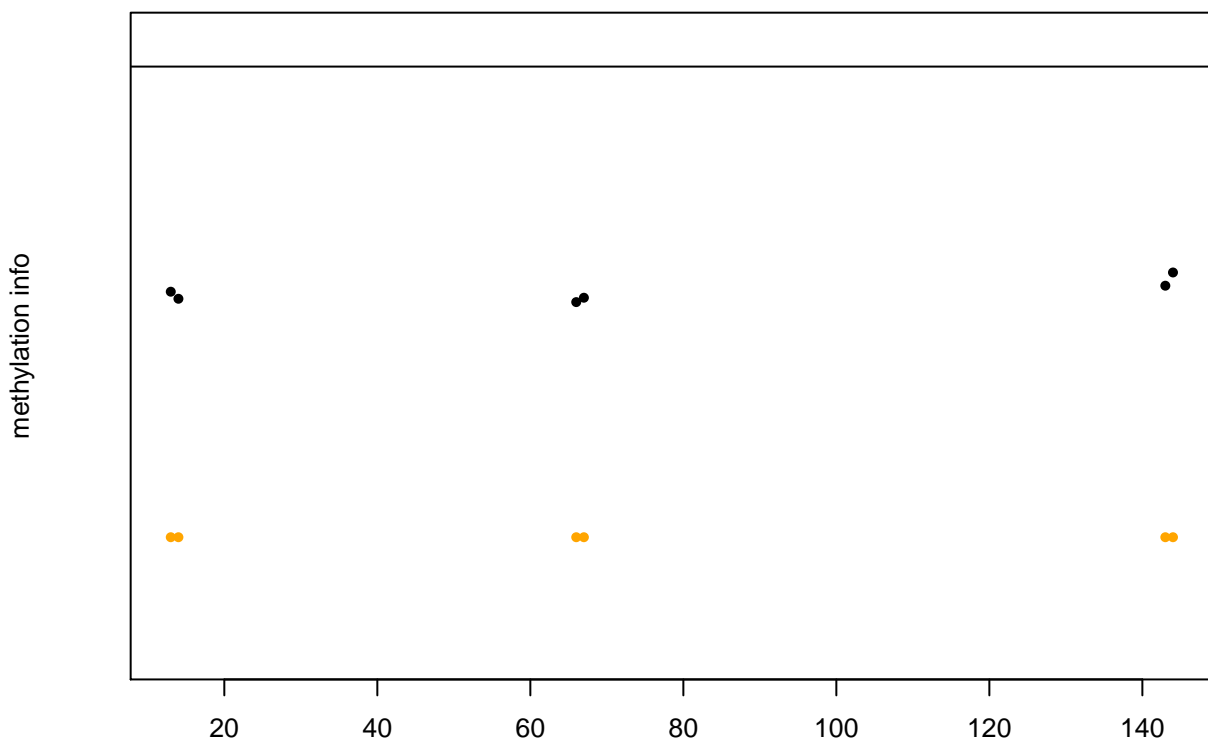

MS4A1 raw %methylation, red=UC, blue=Normal

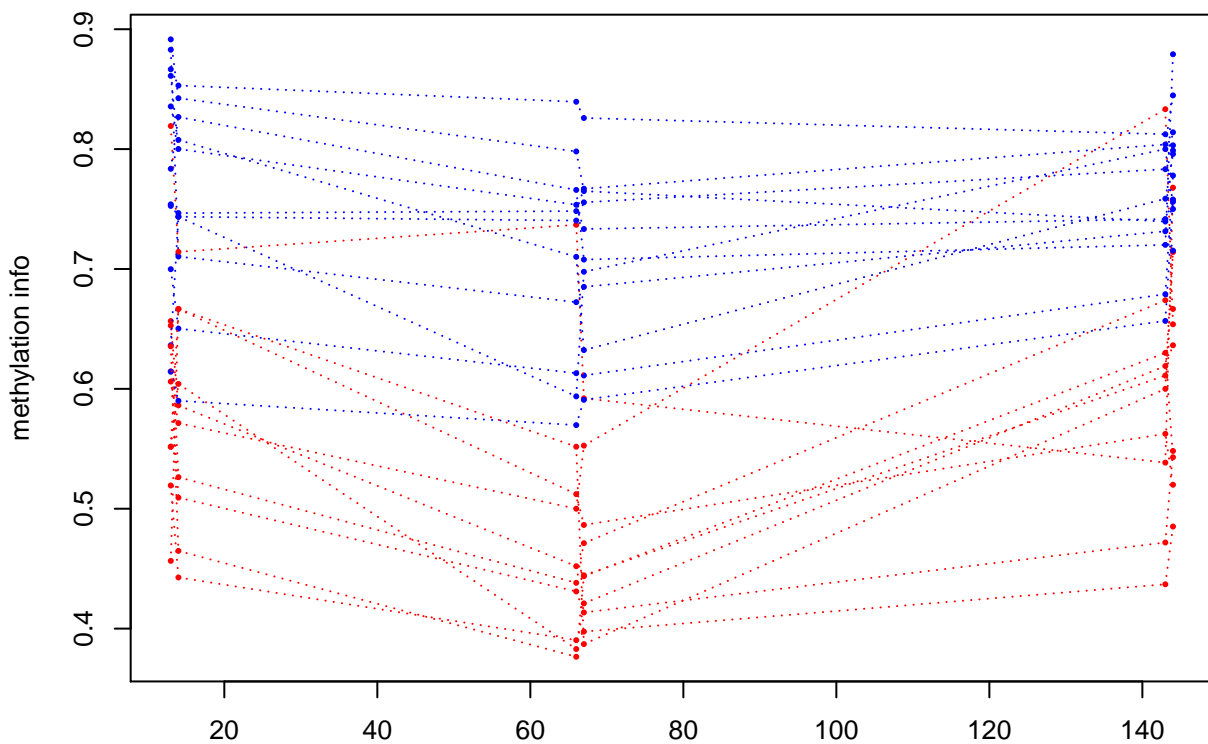

RNAseq logFC(UC-N)= 2.12

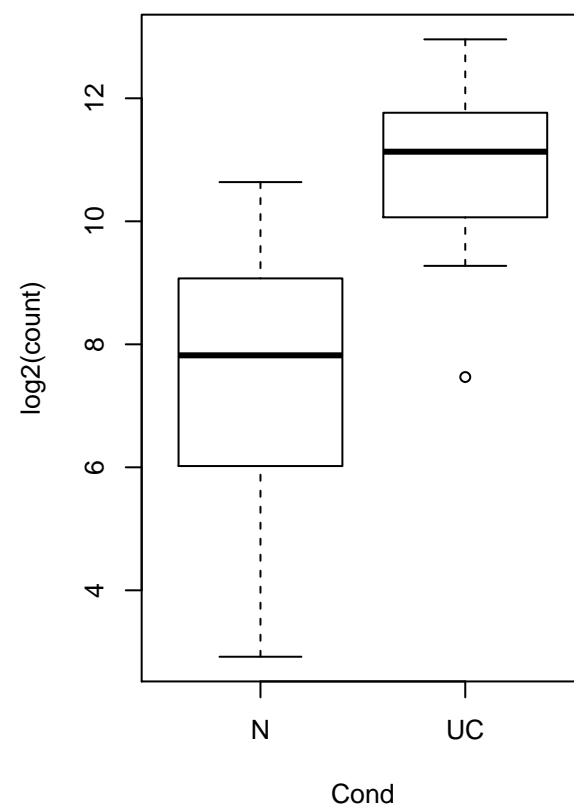

MS4A8 average UC-N %methylation max=21.79% min=-24.28%

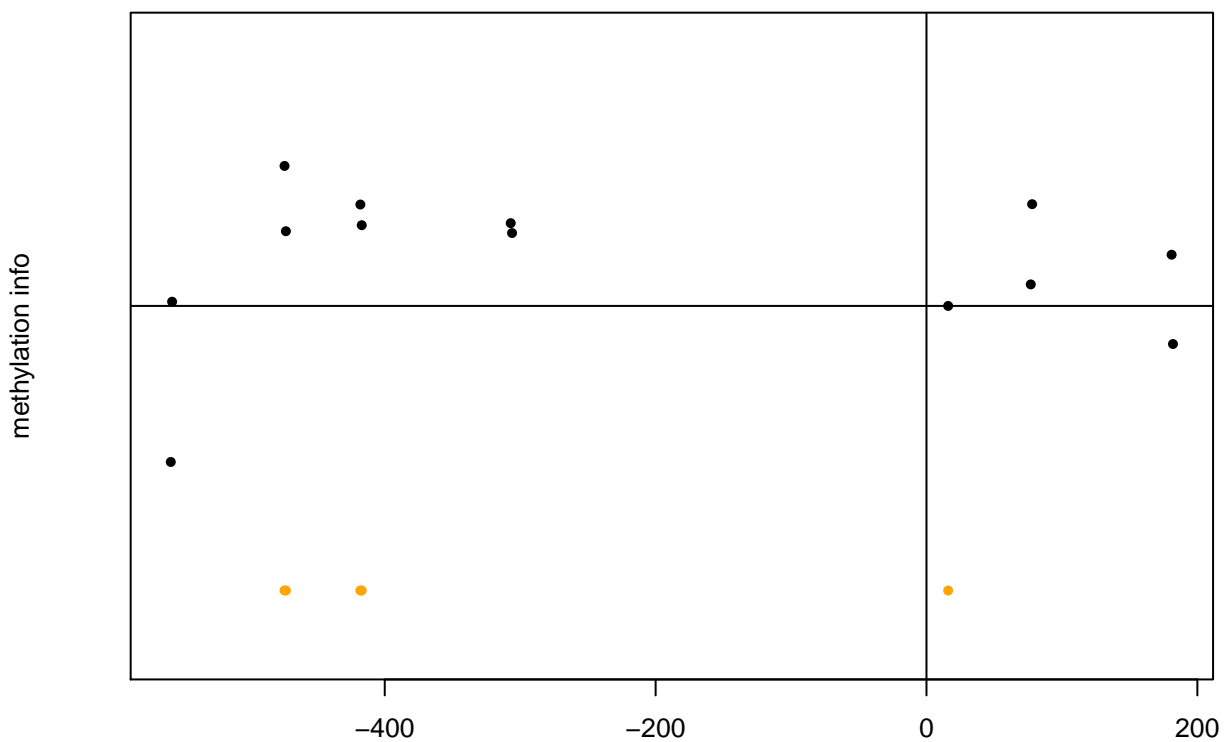

MS4A8 raw %methylation, red=UC, blue=Normal

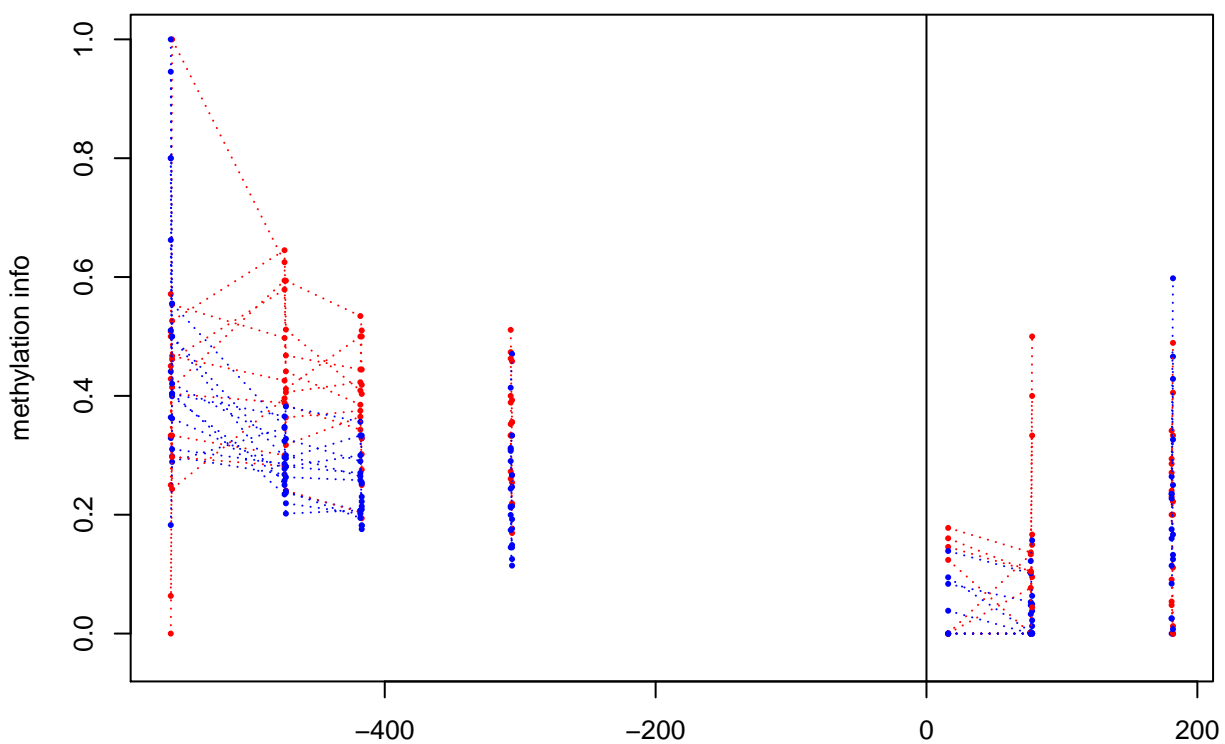

RNAseq logFC(UC-N)= -1.18

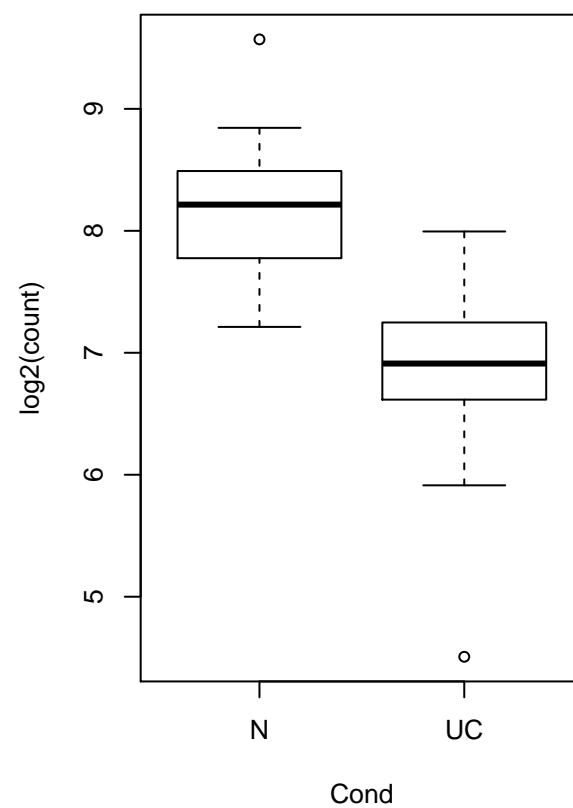

MUC16 average UC-N %methylation max=-3.64% min=-19.19%

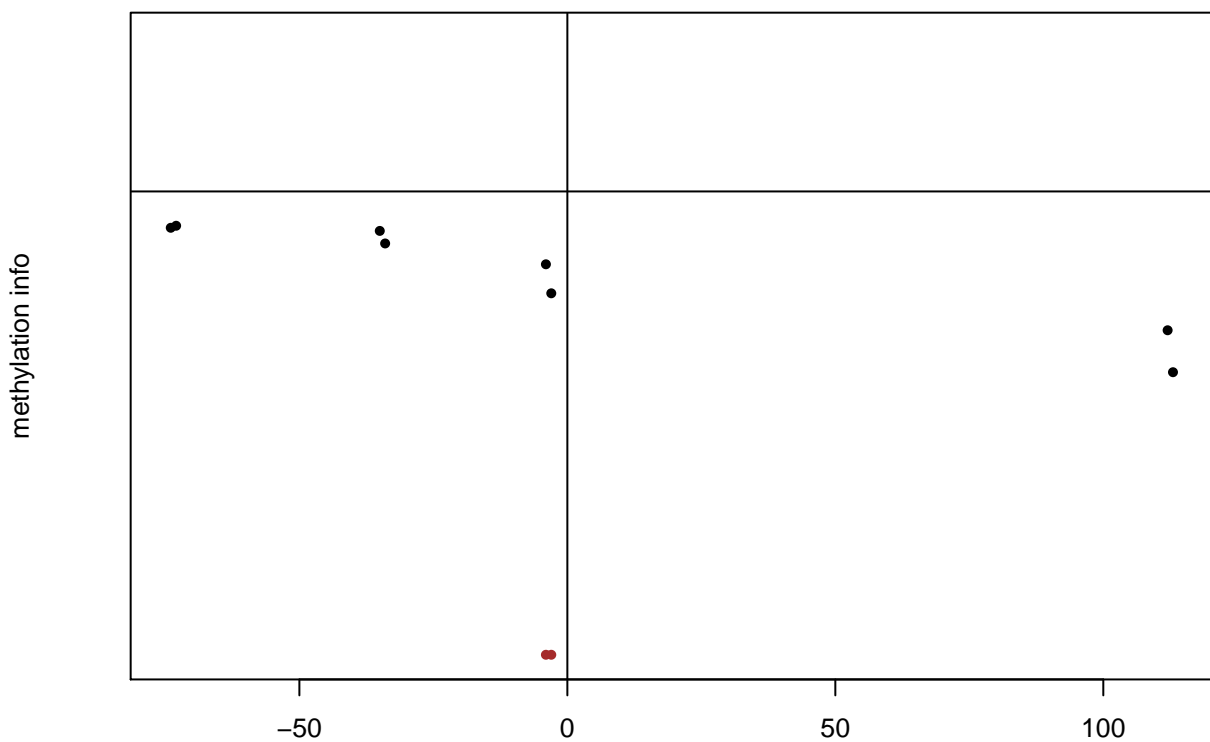

MUC16 raw %methylation, red=UC, blue=Normal

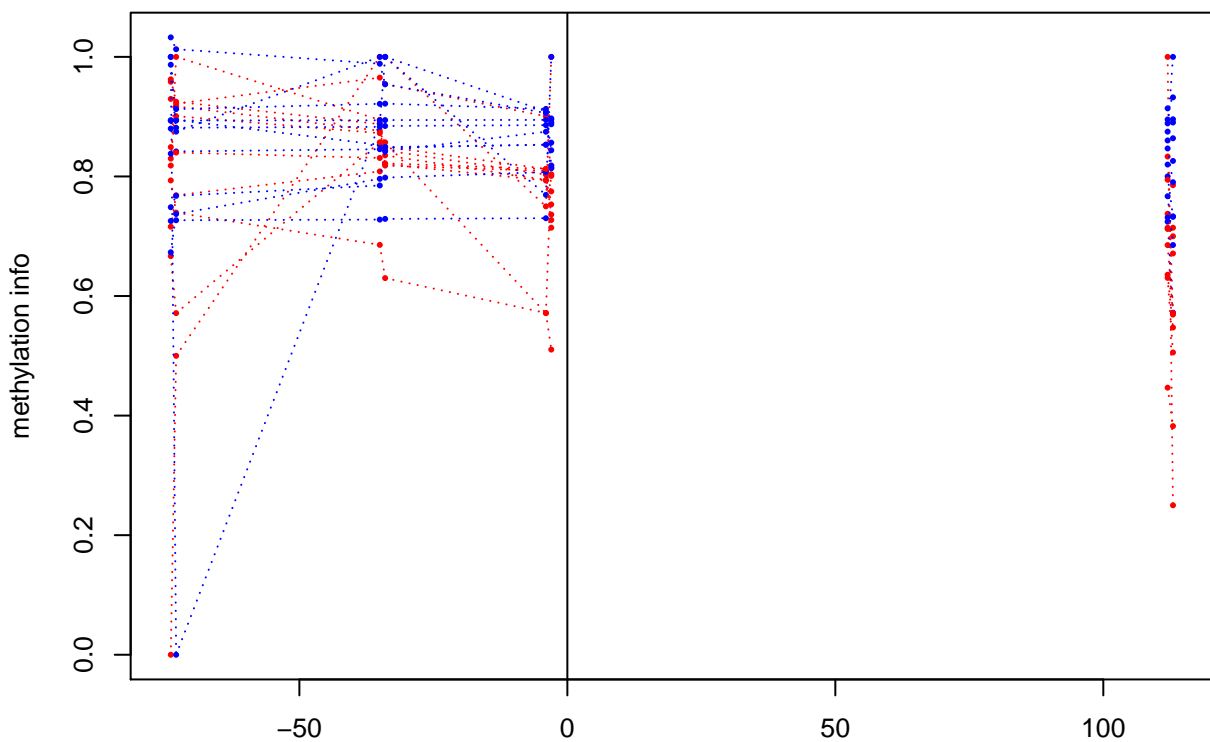

RNAseq logFC(UC-N)= 2.16

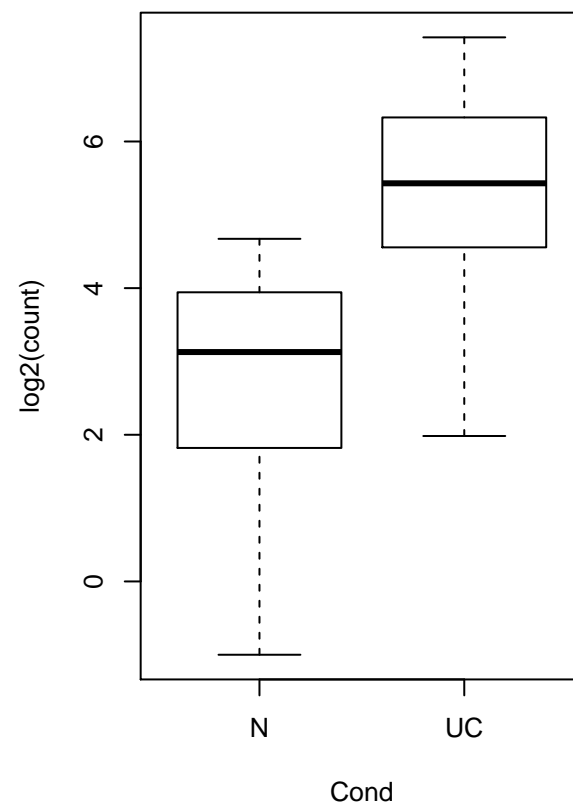

MYO1G average UC-N %methylation max=-29.99% min=-32.57%

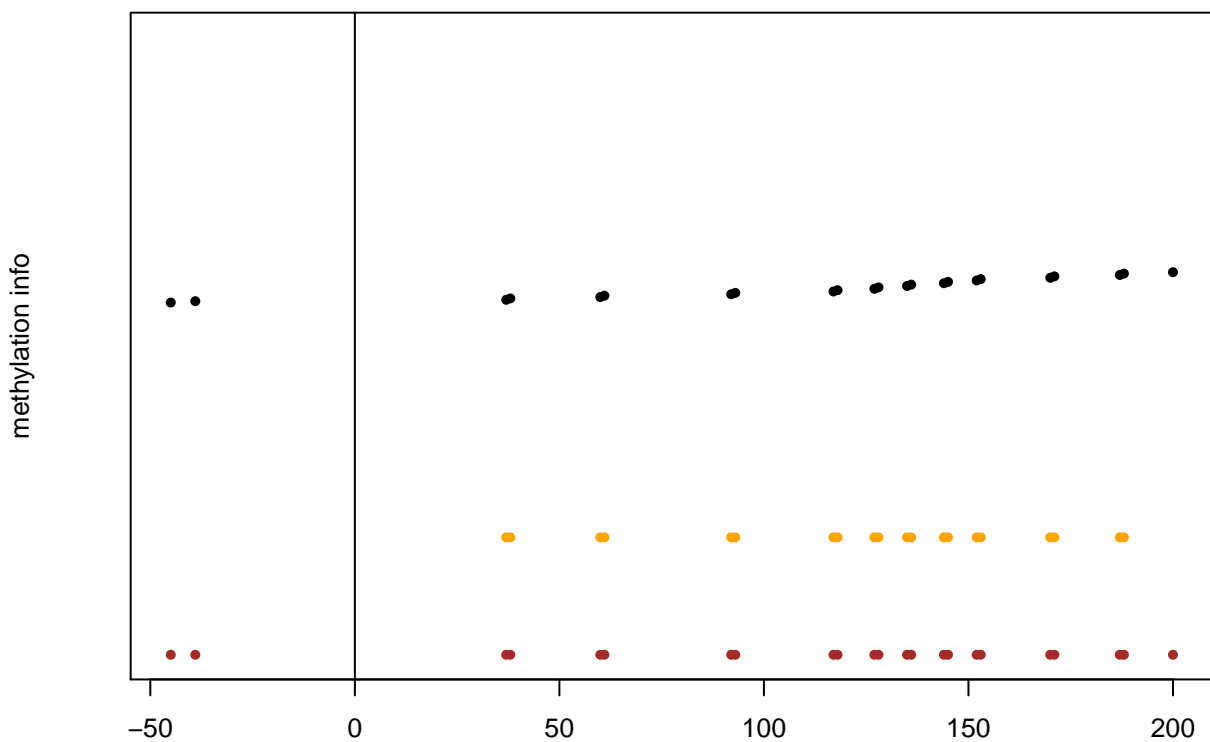

MYO1G raw %methylation, red=UC, blue=Normal

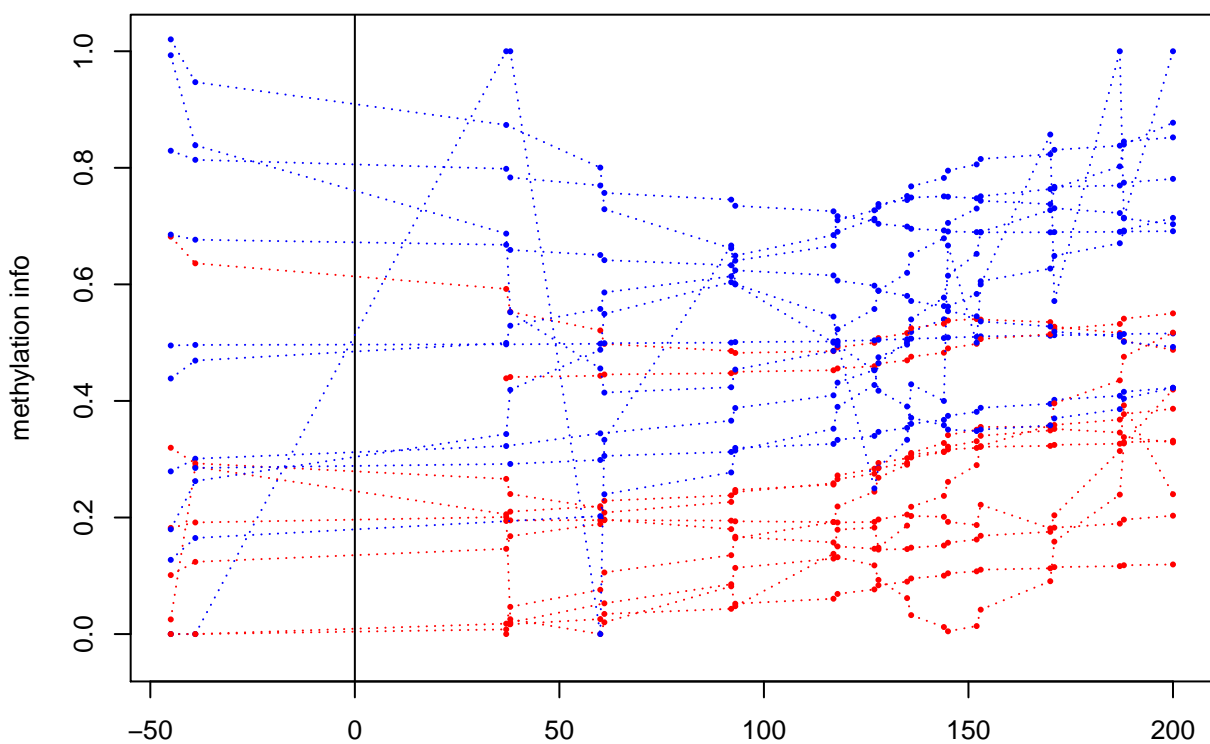

RNAseq logFC(UC-N)= 1.31

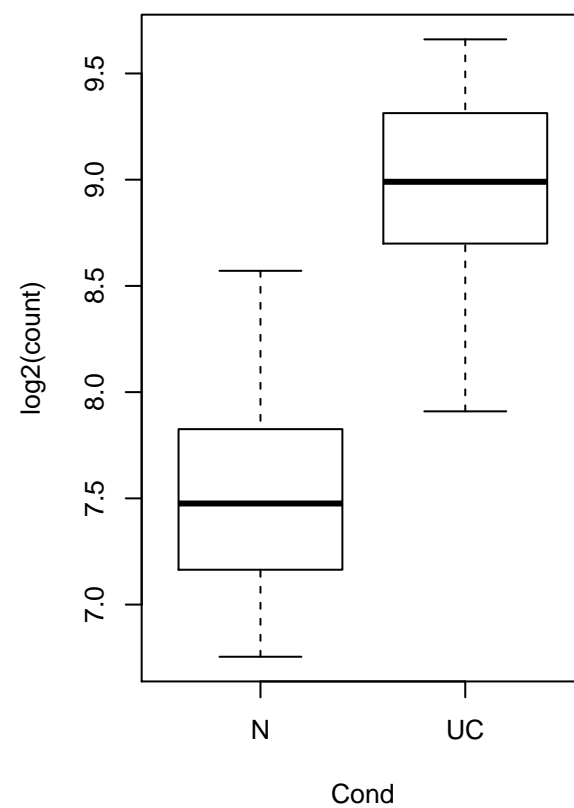

MZB1 average UC-N %methylation max=-7.13% min=-50%

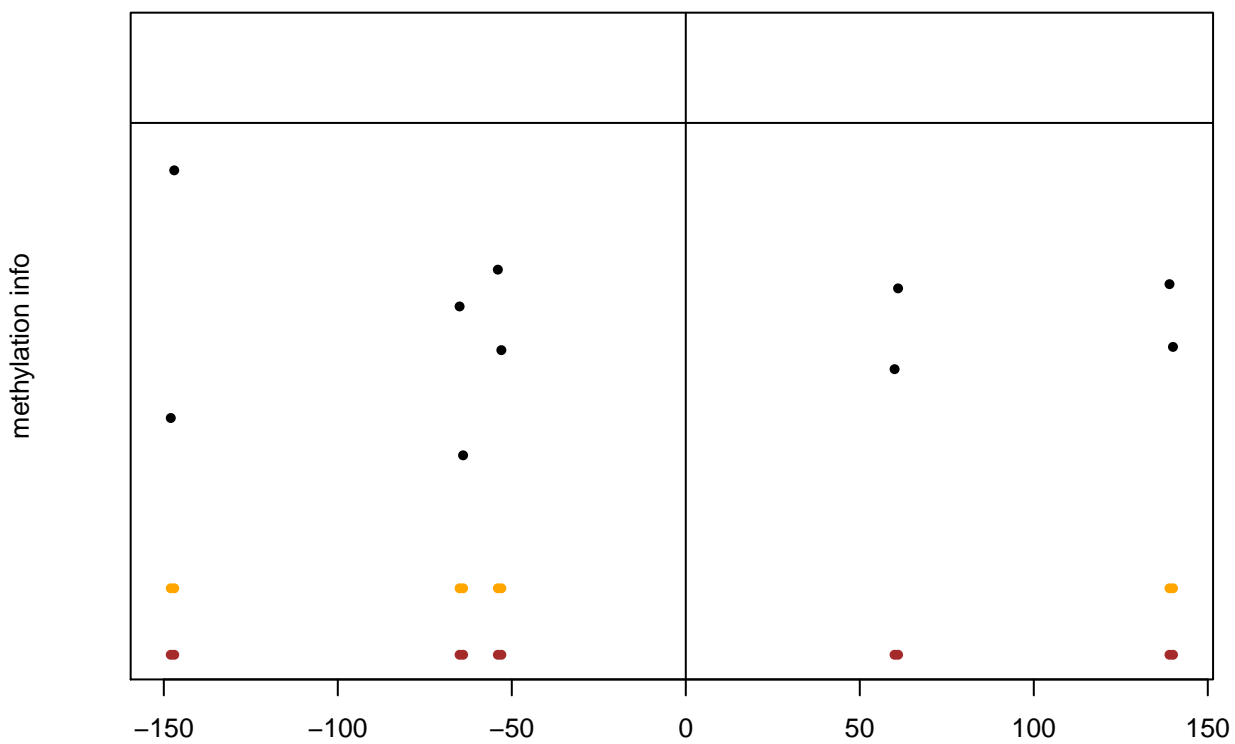

MZB1 raw %methylation, red=UC, blue=Normal

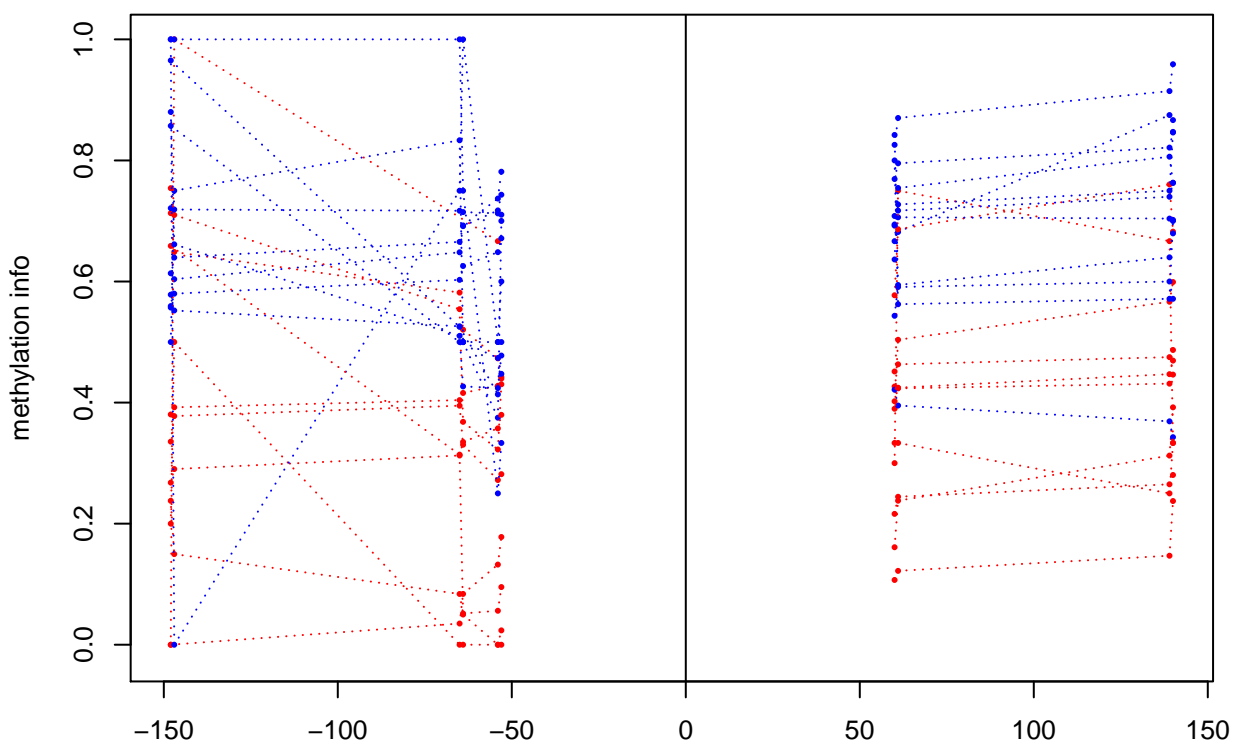

RNAseq logFC(UC-N)= 1.5

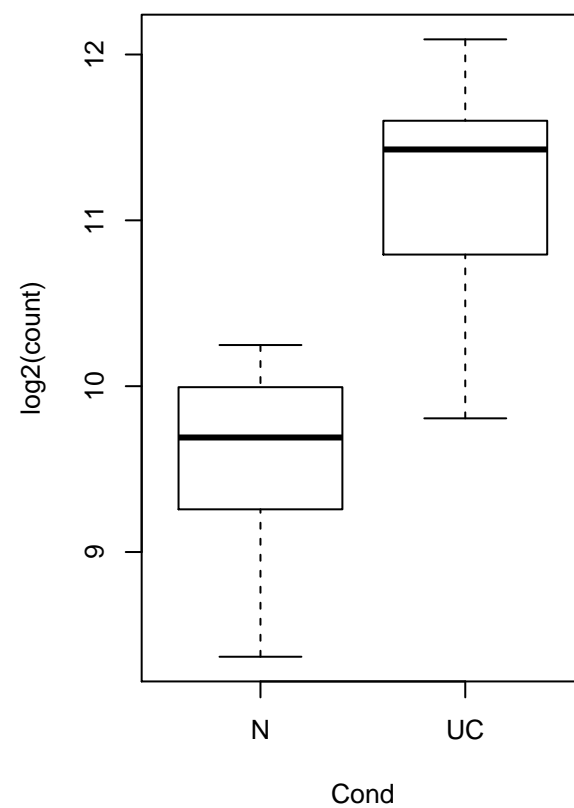

**NCKAP5 average UC-N %methylation max=24.32% min=-0.84%**

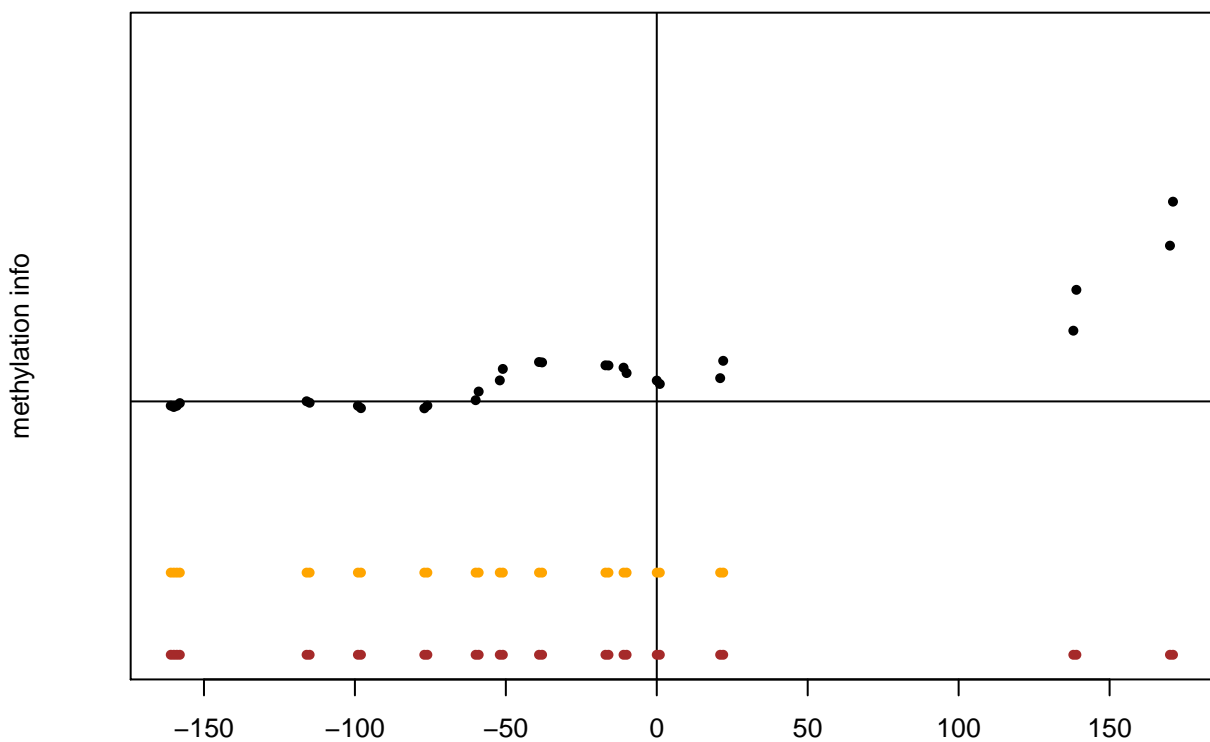

**NCKAP5 raw %methylation, red=UC, blue=Normal**

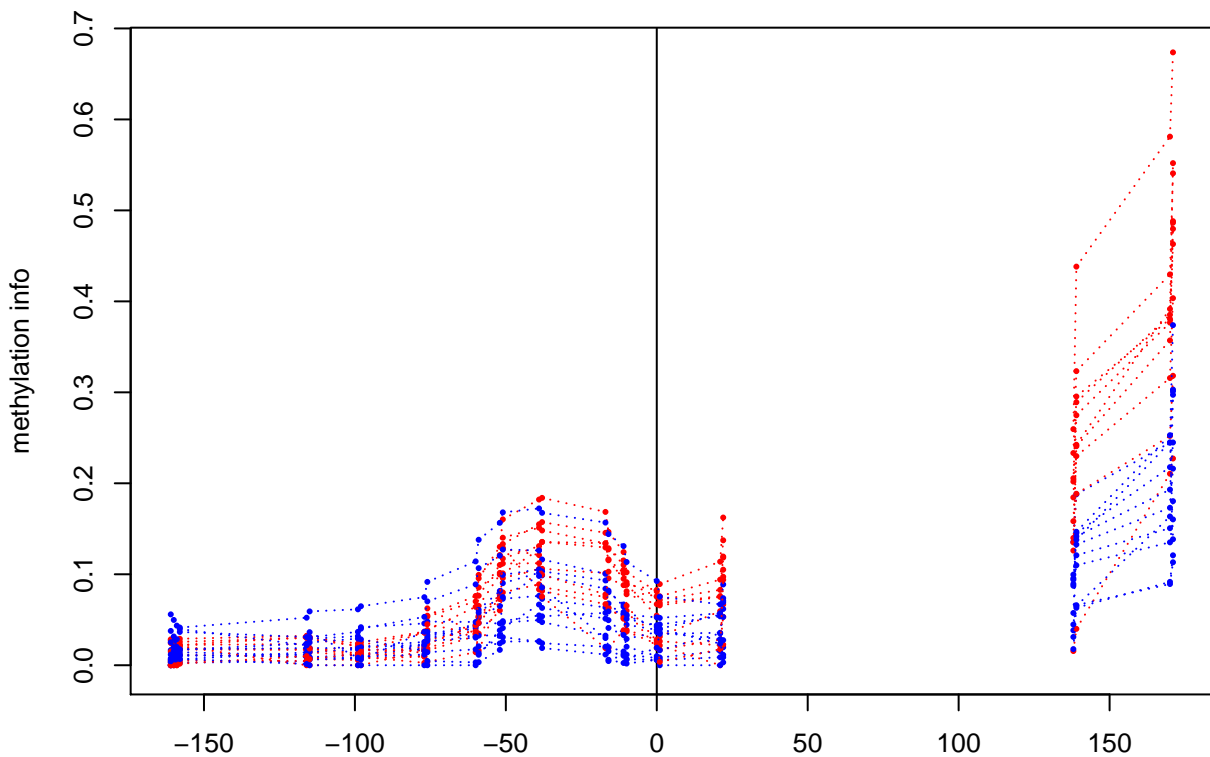

**RNAseq logFC(UC-N)= -1.21**

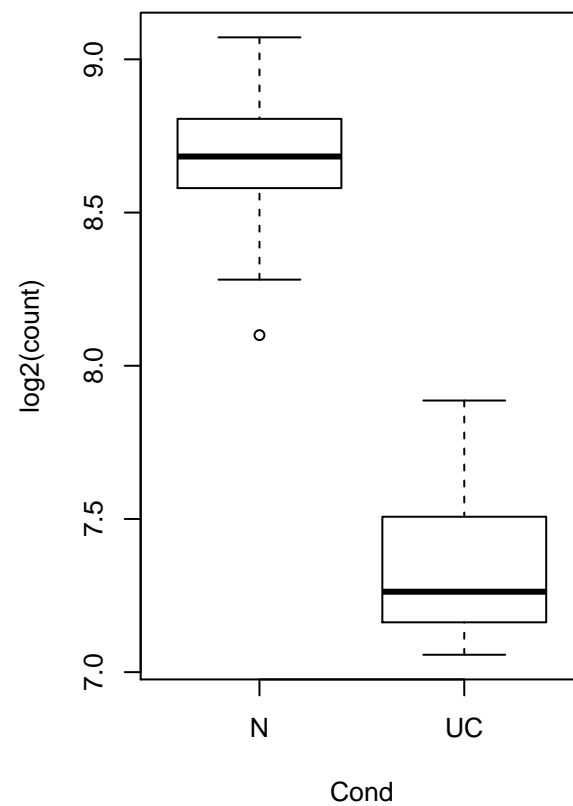

NFAM1 average UC-N %methylation max=-13.32% min=-41.73%

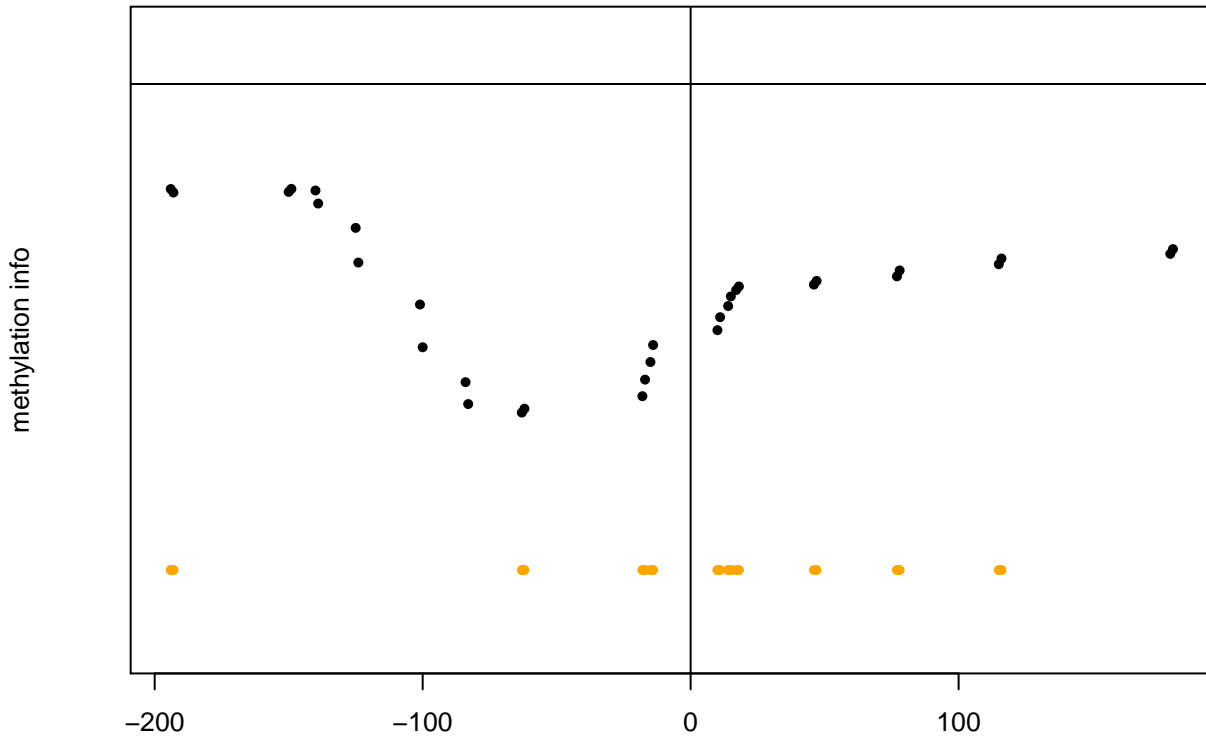

NFAM1 raw %methylation, red=UC, blue=Normal

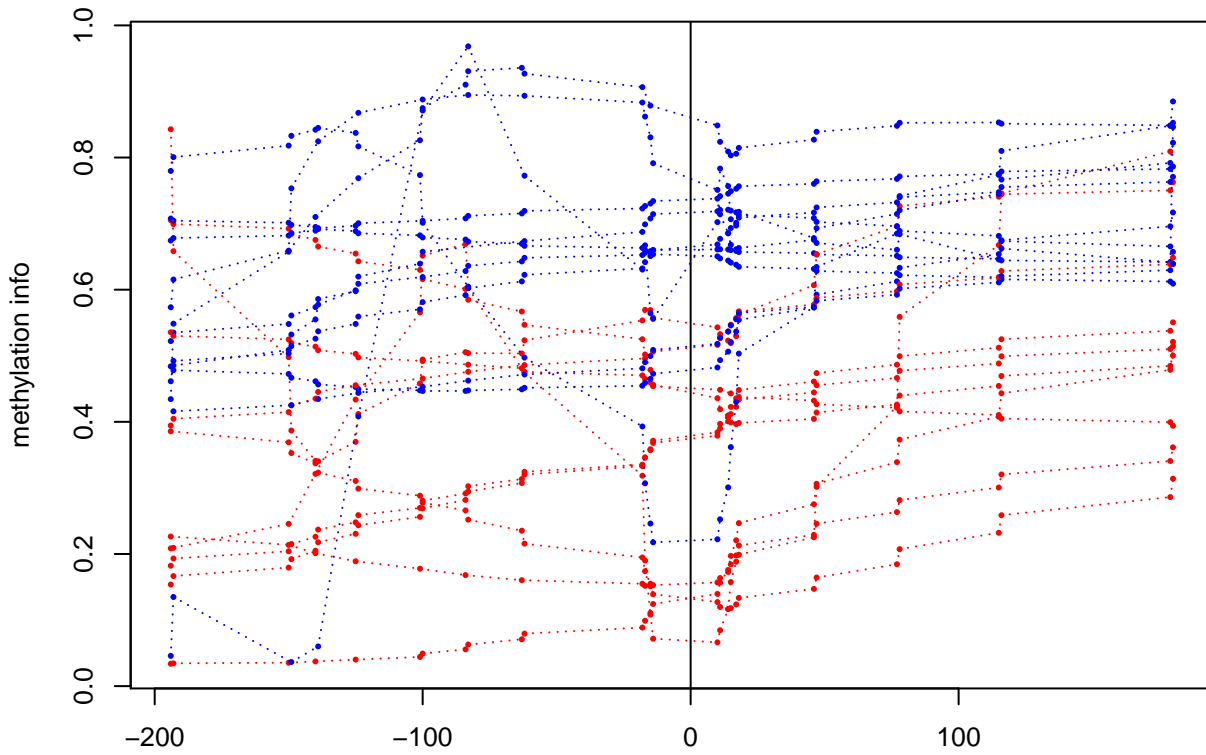

RNAseq logFC(UC-N)= 1.05

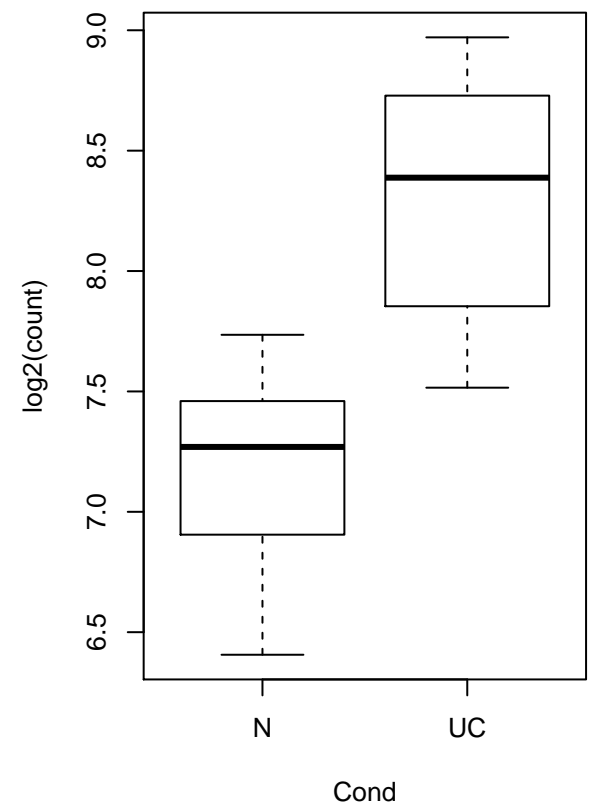



**NKG7 average UC-N %methylation max=-17.07% min=-20.01%**

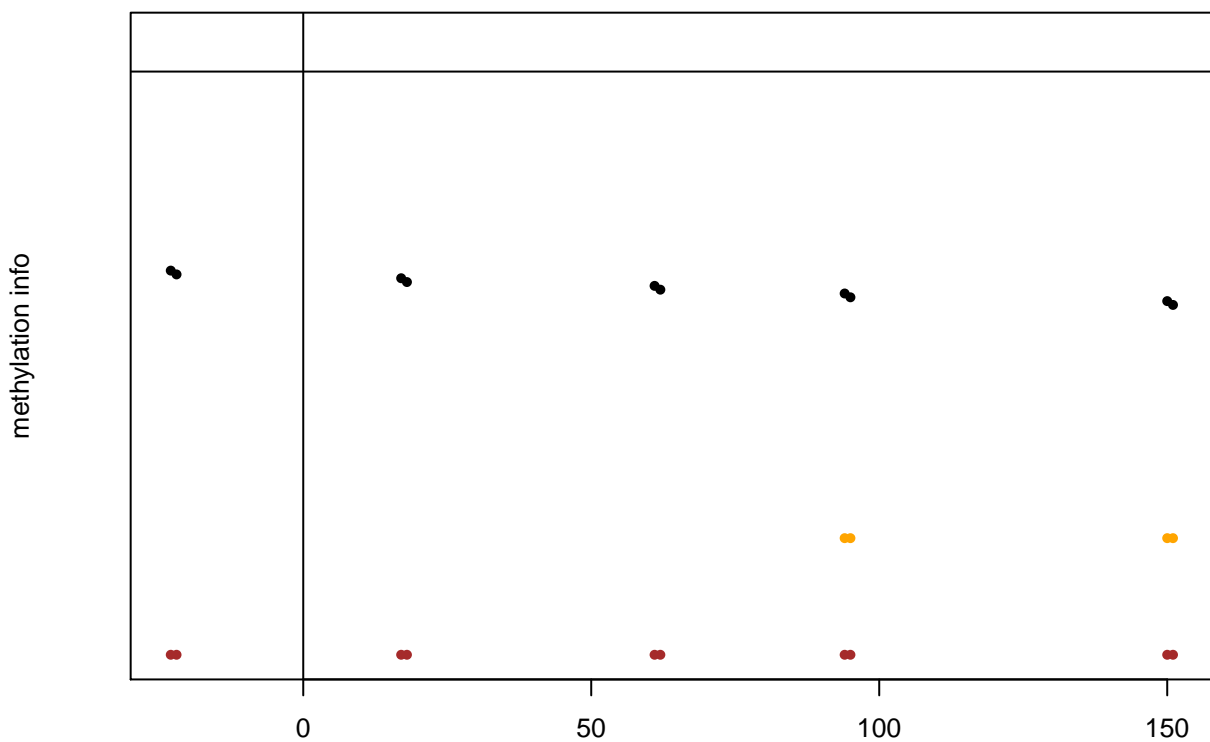

**NKG7 raw %methylation, red=UC, blue=Normal**

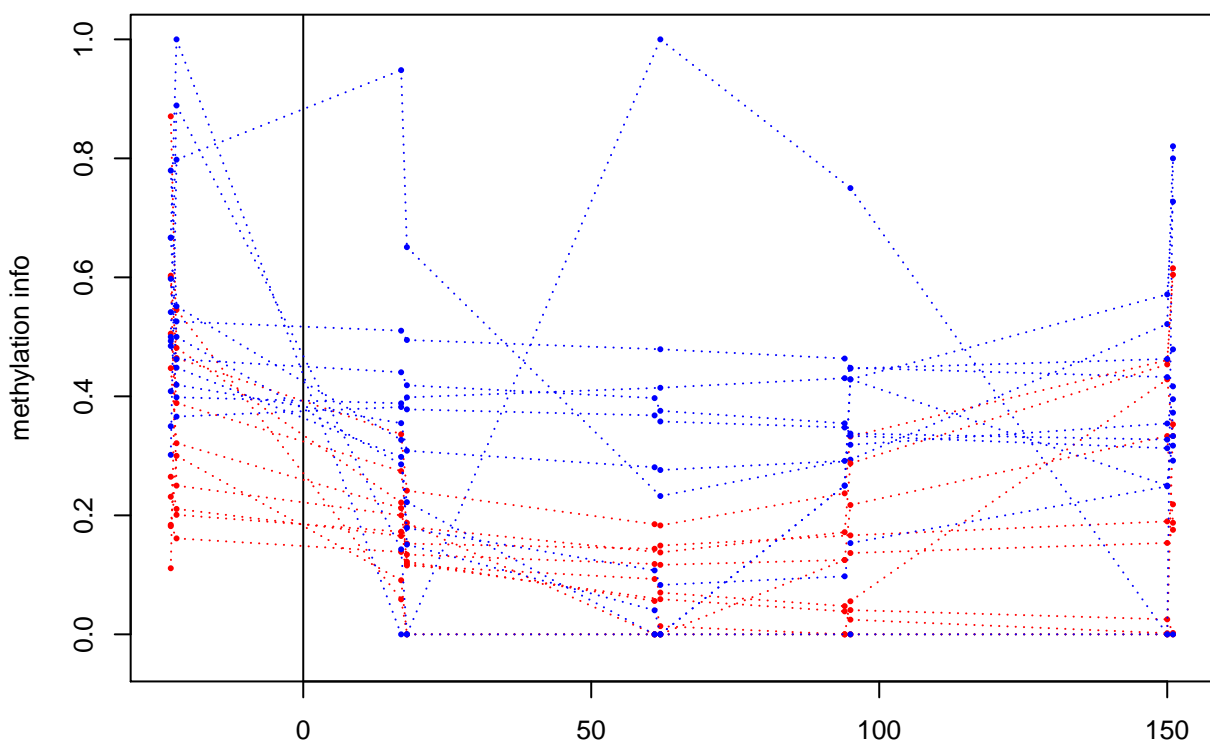

**RNAseq logFC(UC-N)= 1.66**

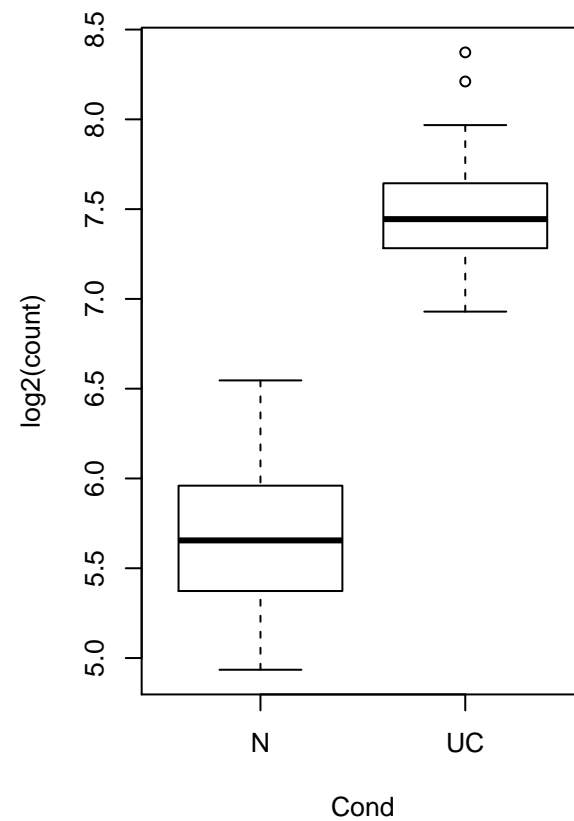

NLRC3 average UC-N %methylation max=-16.57% min=-25.53%

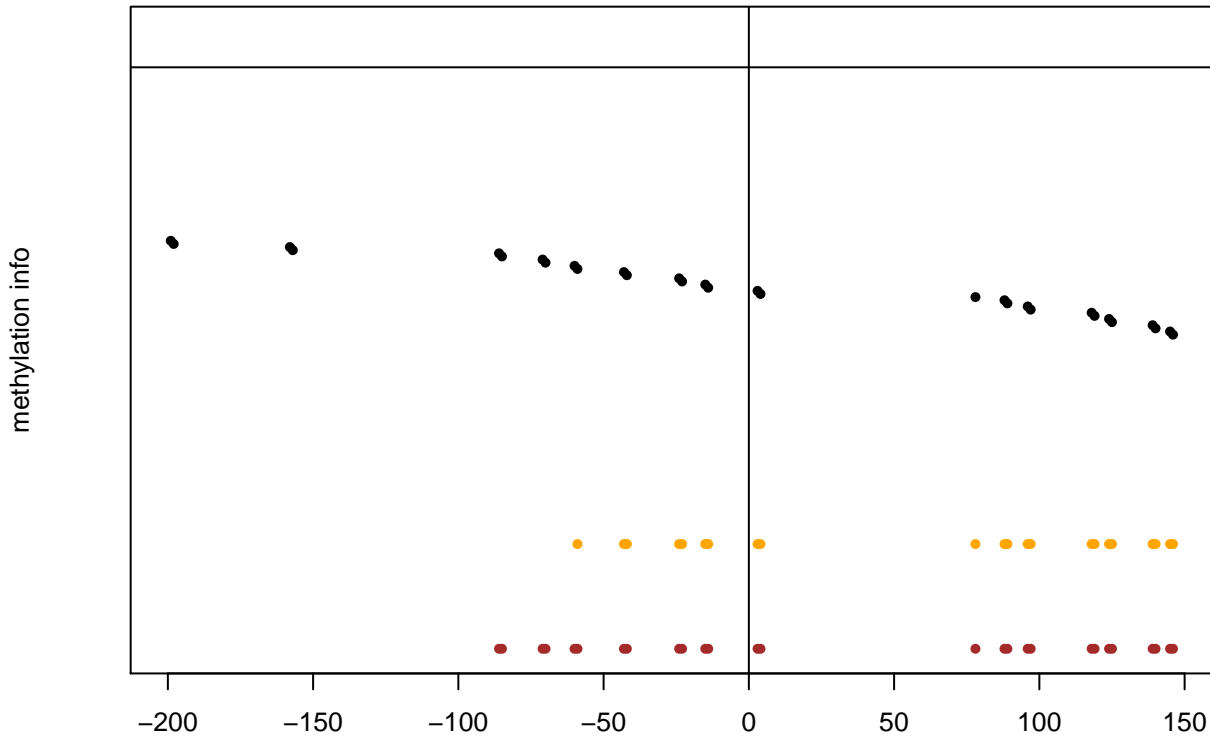

NLRC3 raw %methylation, red=UC, blue=Normal

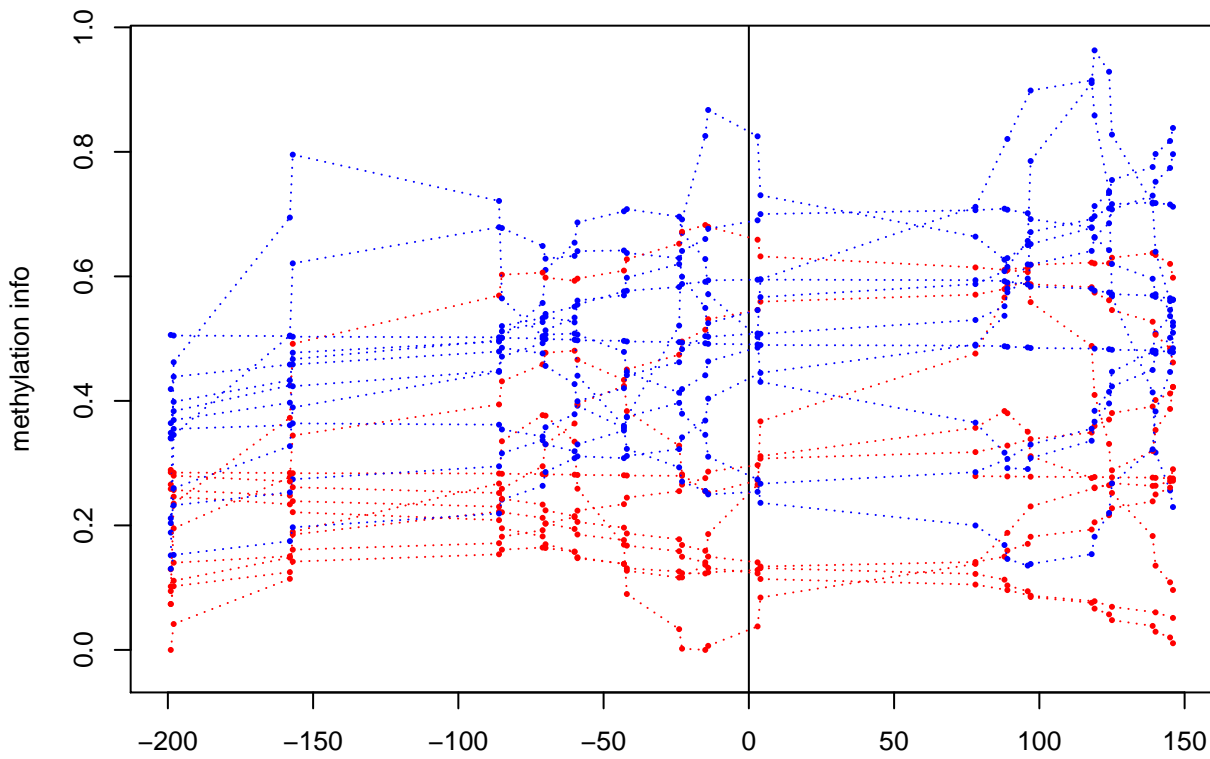

RNAseq logFC(UC-N)= 1.15

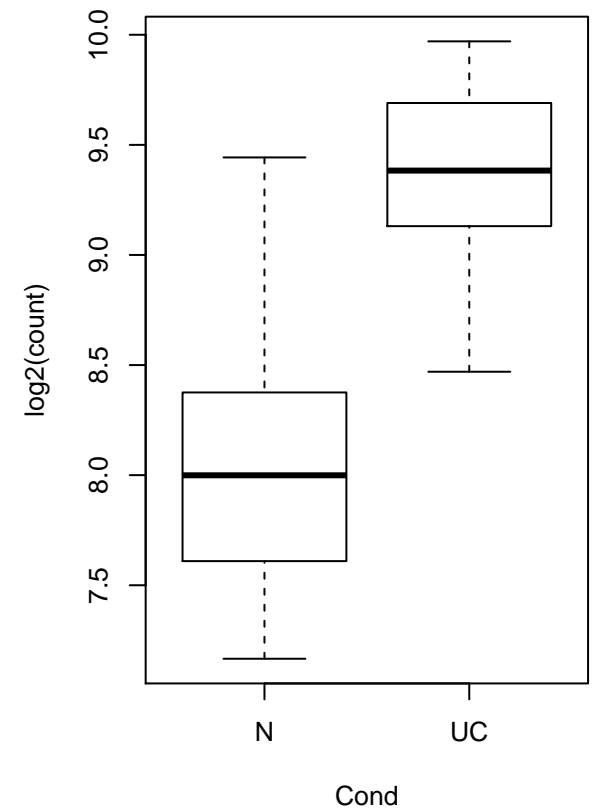

NLRC5 average UC-N %methylation max=0.14% min=-20.95%

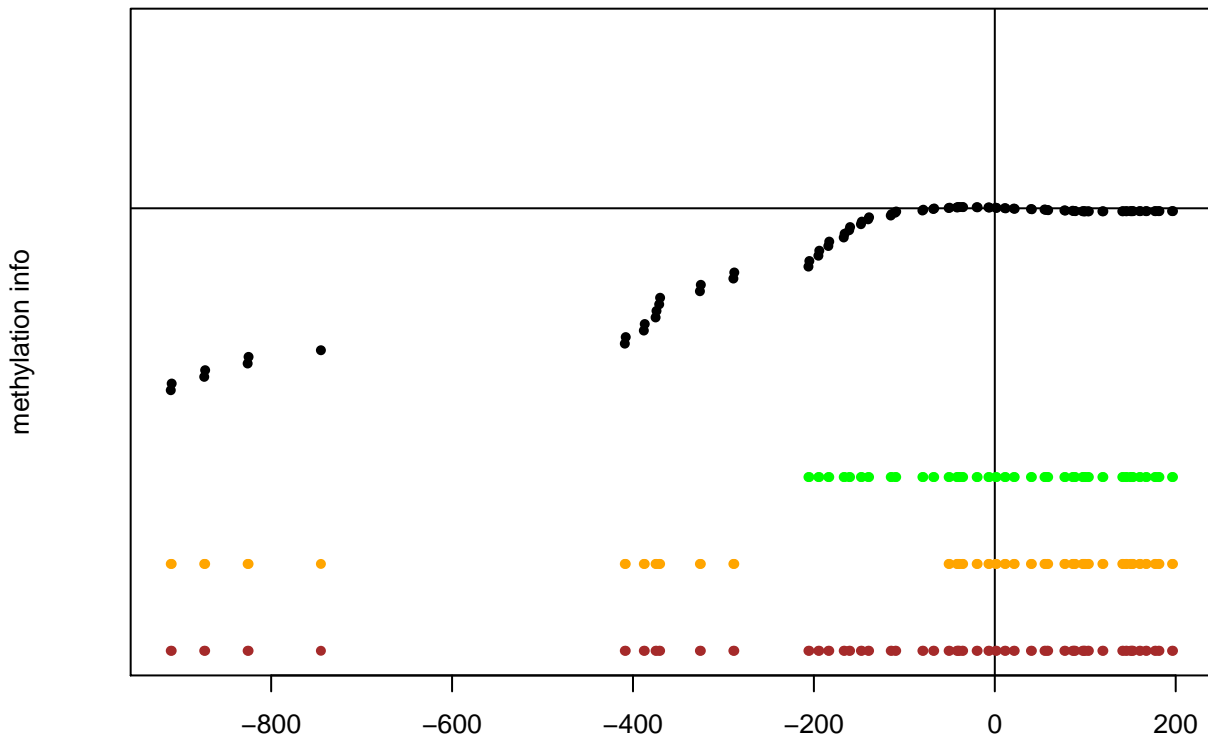

NLRC5 raw %methylation, red=UC, blue=Normal

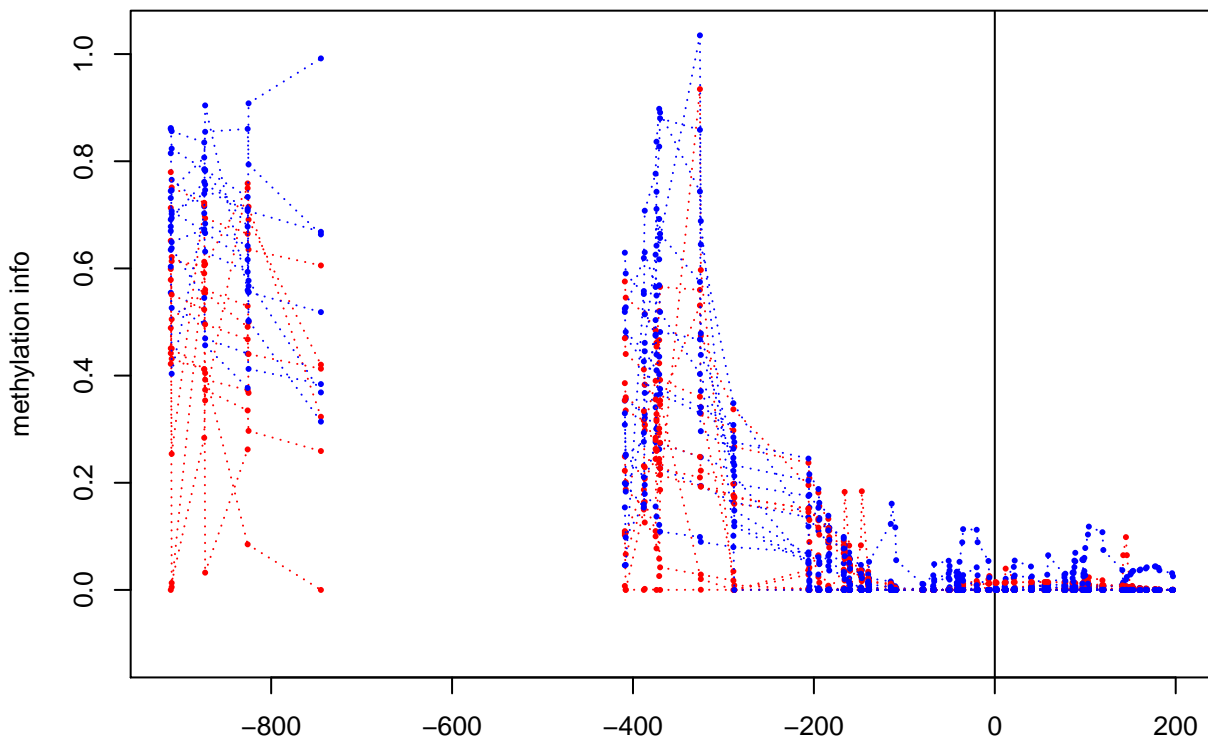

RNAseq logFC(UC-N)= 1.34

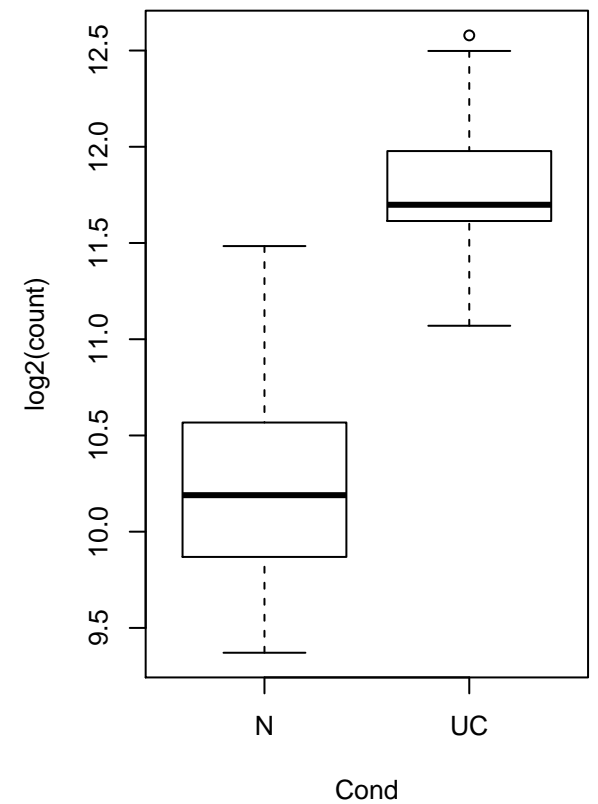

NLRP1 average UC-N %methylation max=-3.13% min=-56.51%

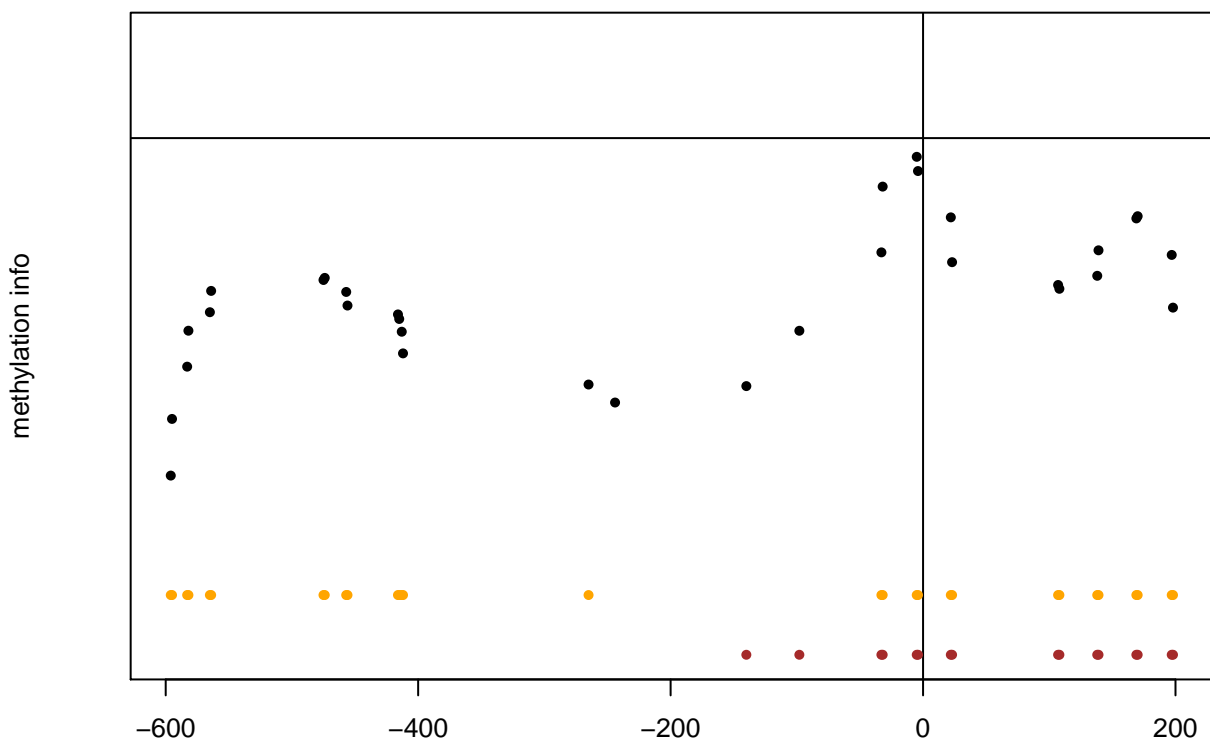

NLRP1 raw %methylation, red=UC, blue=Normal

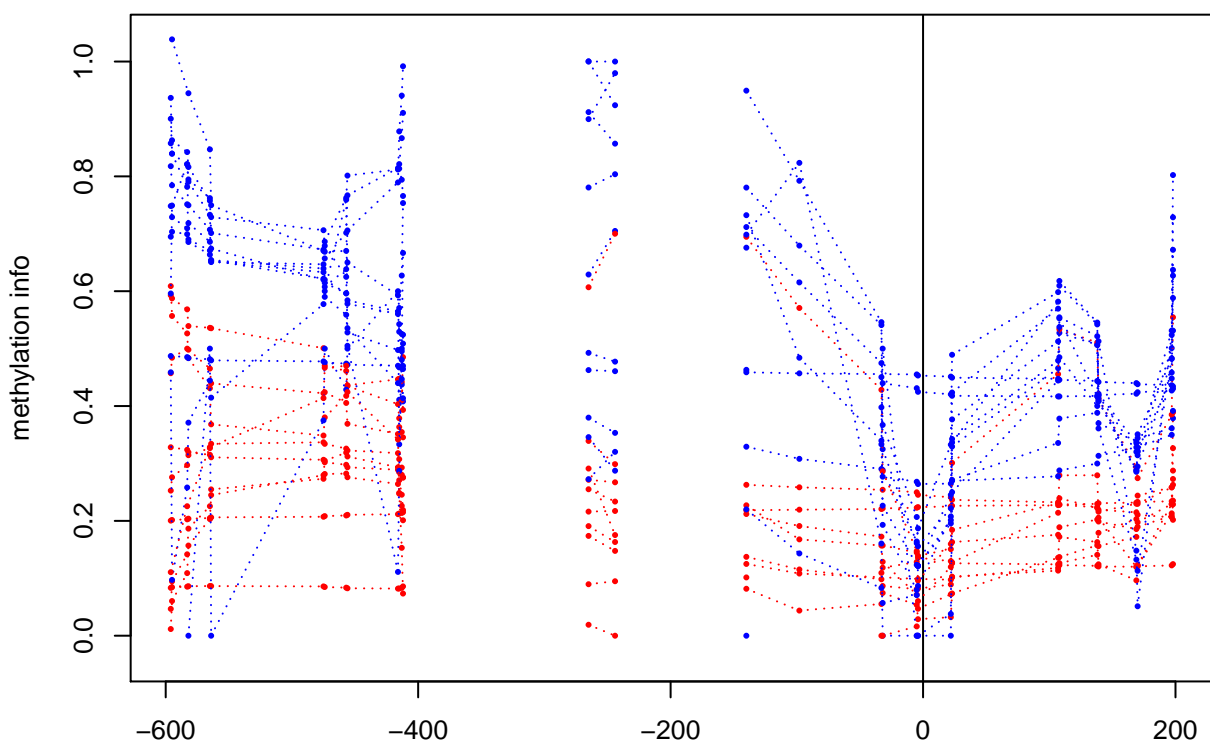

RNAseq logFC(UC-N)= 1.06

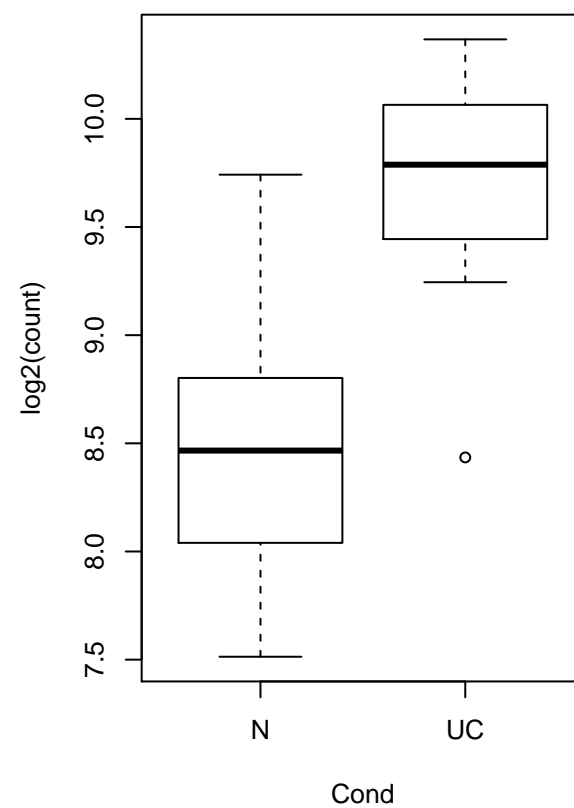

NWD1 average UC-N %methylation max=8.36% min=4.3%

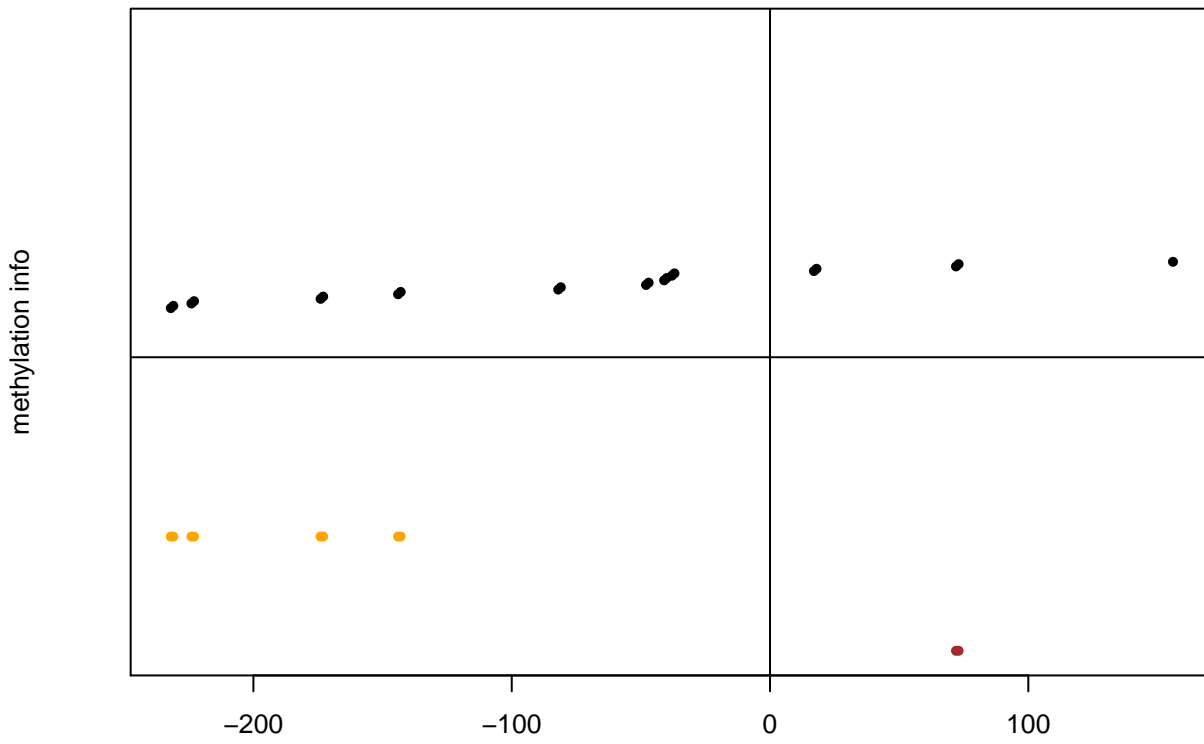

NWD1 raw %methylation, red=UC, blue=Normal

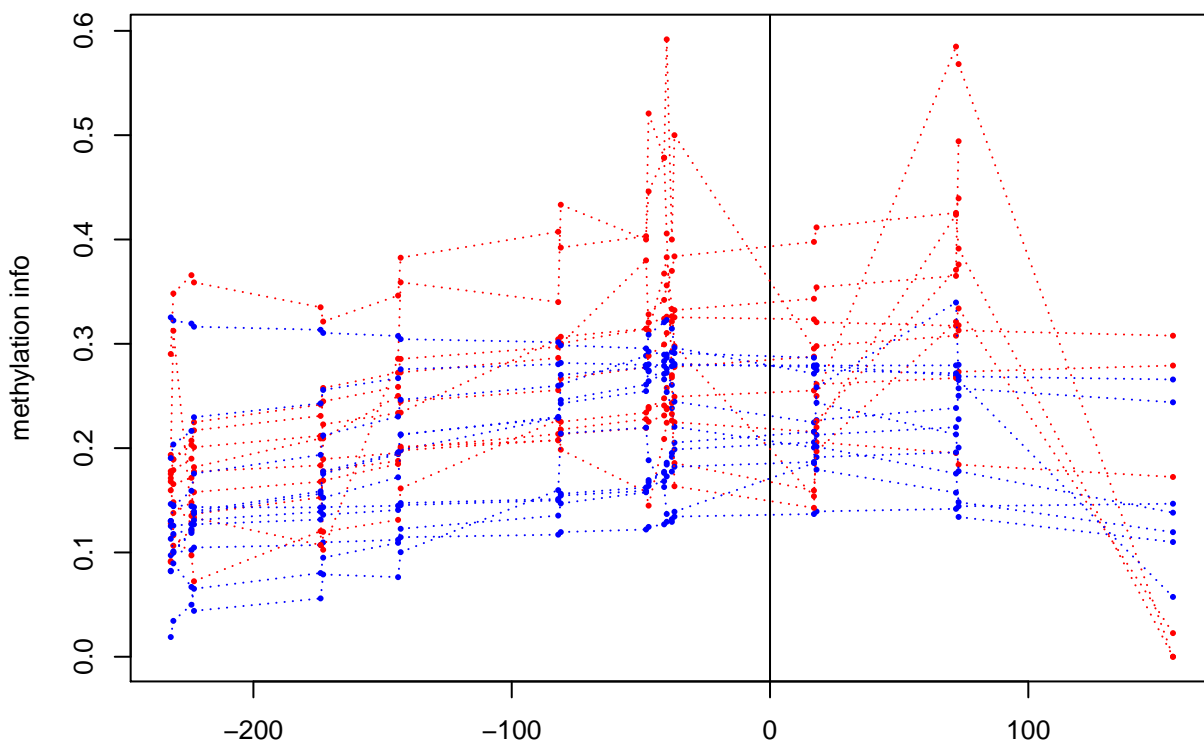

RNAseq logFC(UC-N)= -1.16

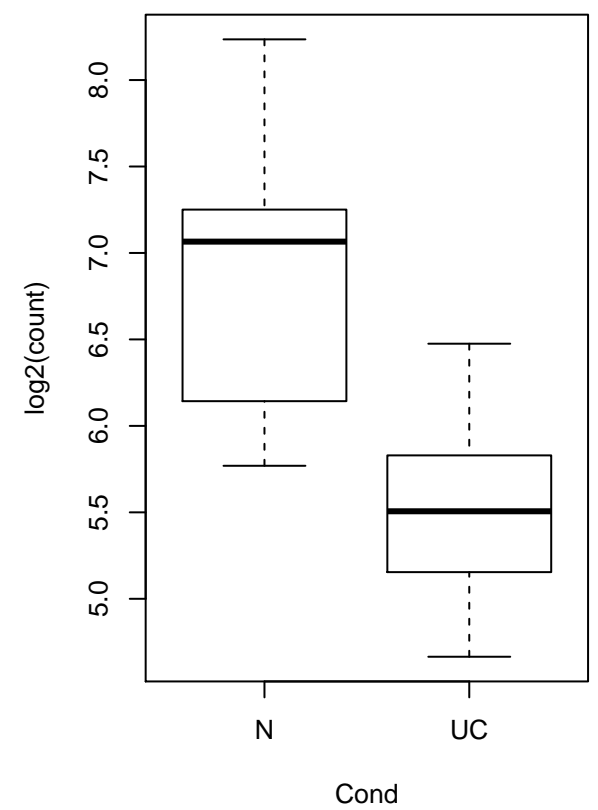

NXPE2 average UC-N %methylation max=17.77% min=3.73%

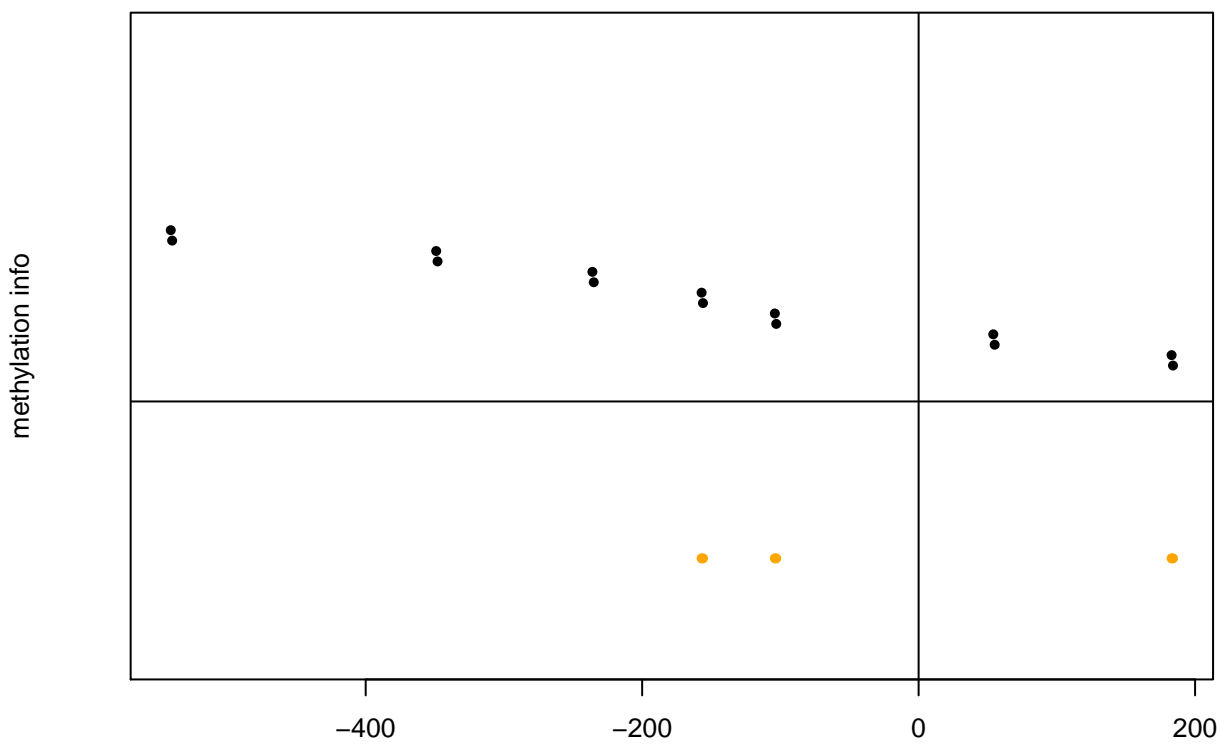

NXPE2 raw %methylation, red=UC, blue=Normal

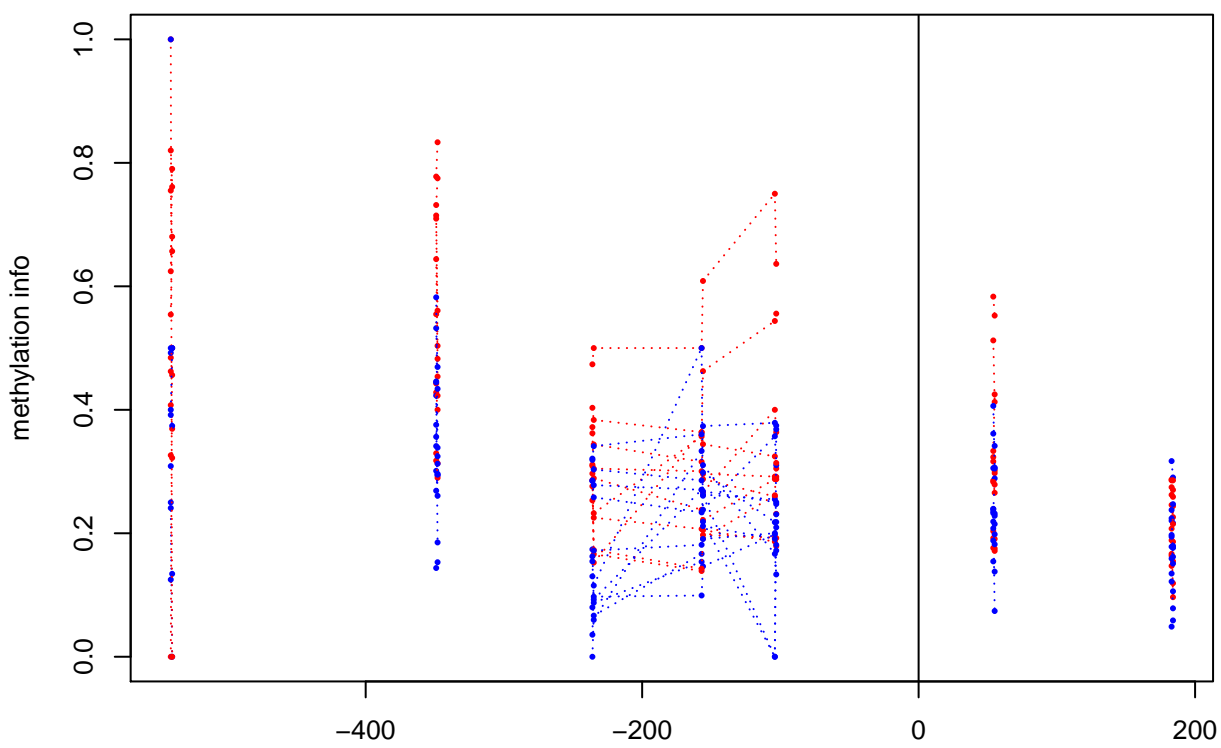

RNAseq logFC(UC-N) = -1.04

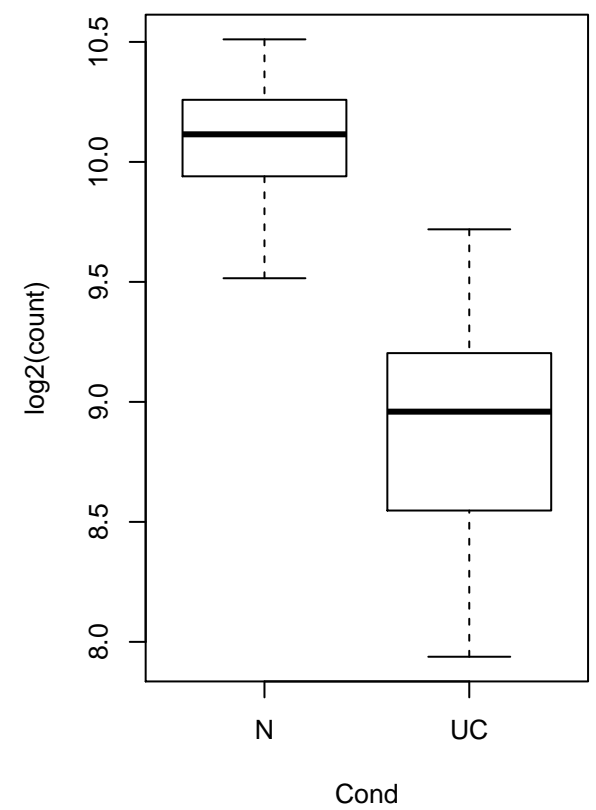

NXPE3 average UC-N %methylation max=1.5% min=-19.29%

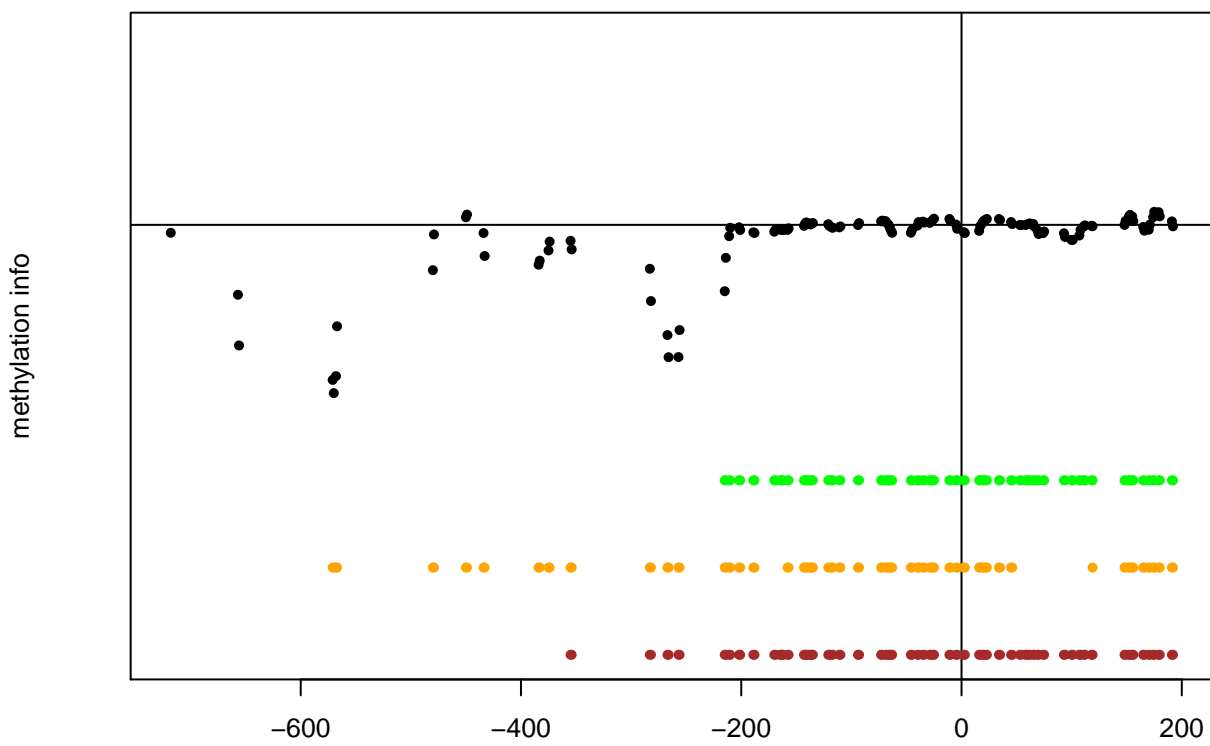

NXPE3 raw %methylation, red=UC, blue=Normal

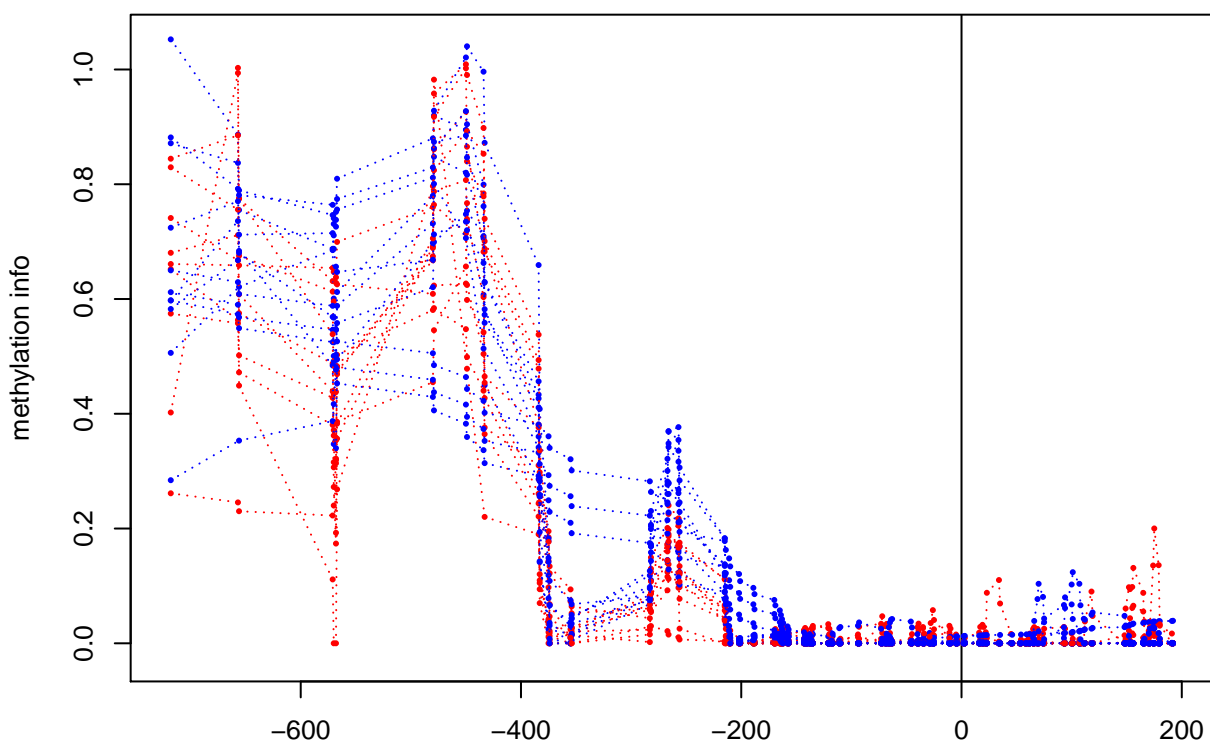

RNAseq logFC(UC-N)= 1.12

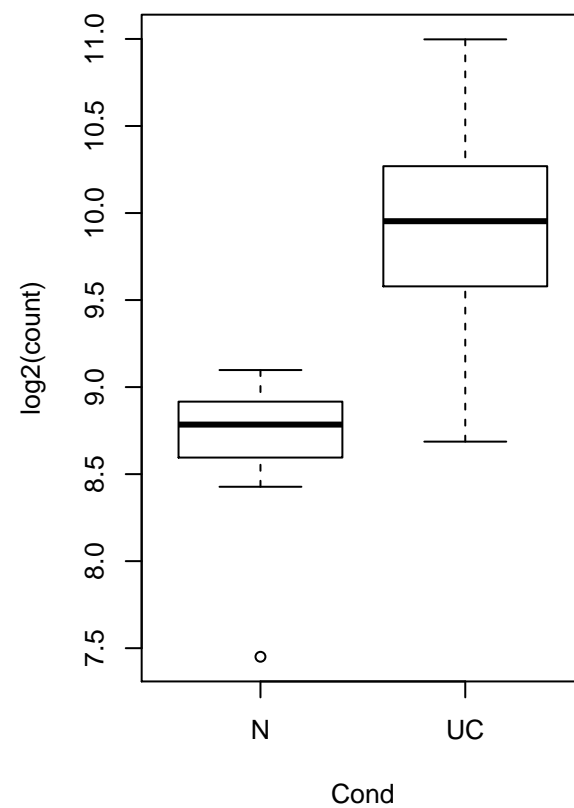

OAS2 average UC-N %methylation max=-0.39% min=-27.15%

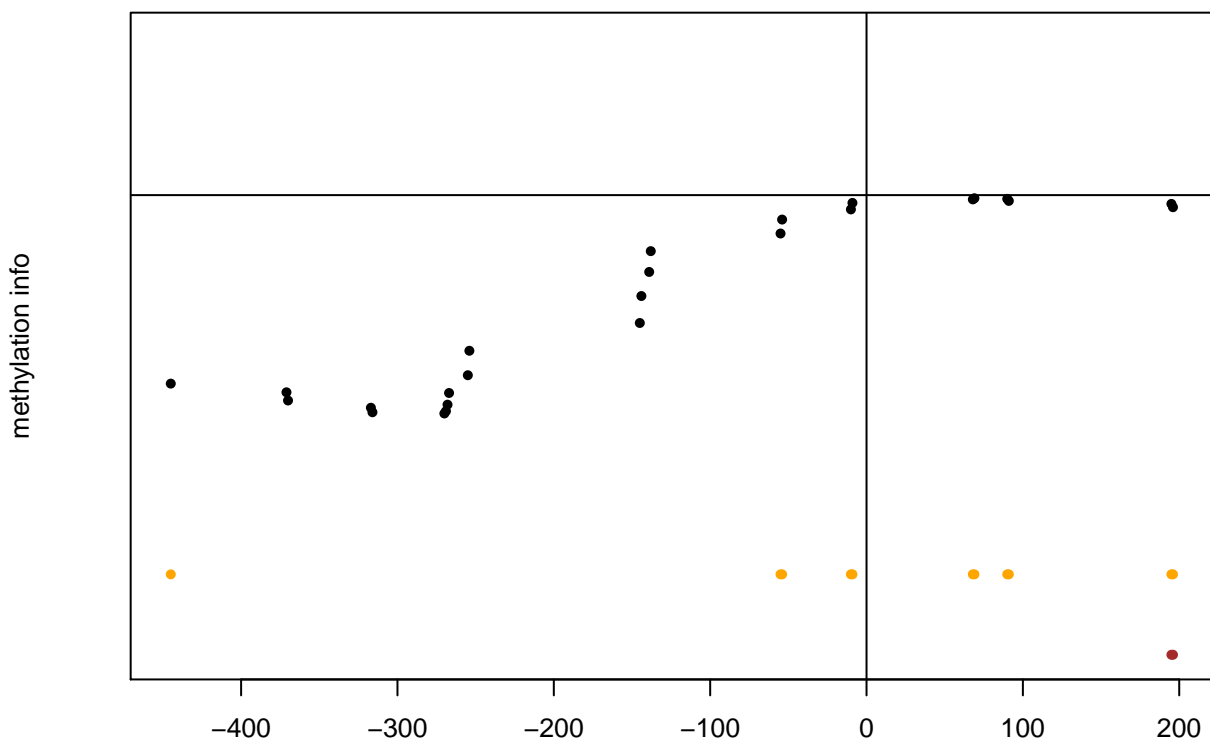

OAS2 raw %methylation, red=UC, blue=Normal

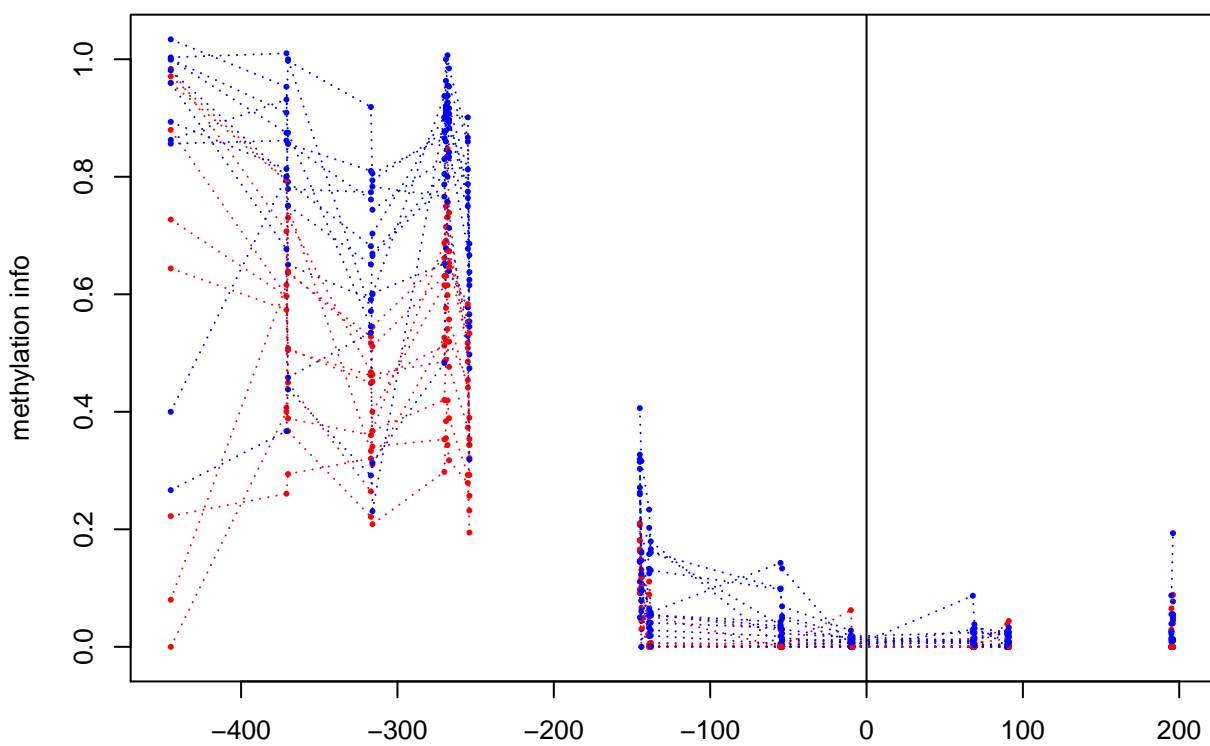

RNAseq logFC(UC-N)= 1.43

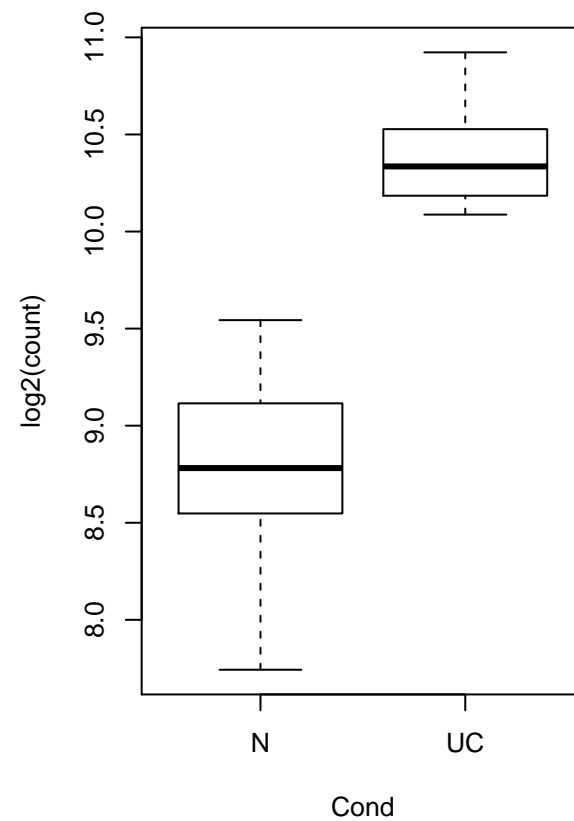



OLFM4 average UC-N %methylation max=-8.74% min=-18.33%

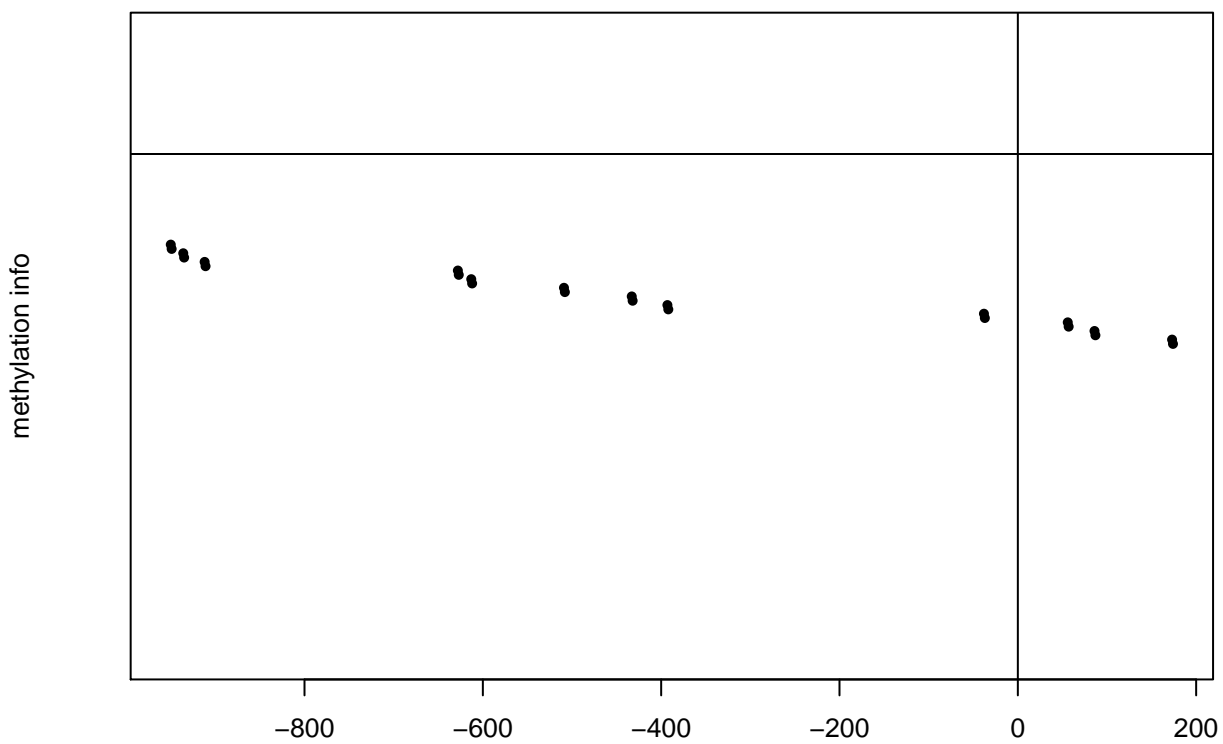

OLFM4 raw %methylation, red=UC, blue=Normal

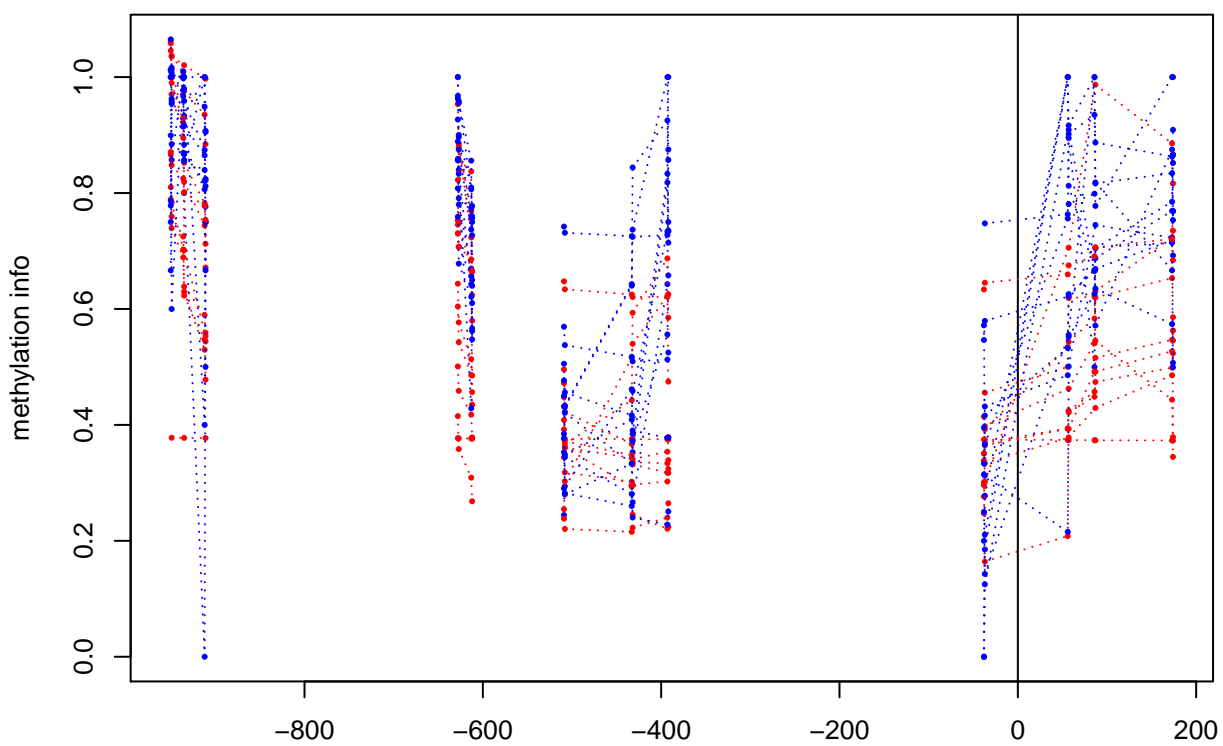

RNAseq logFC(UC-N)= 3.49

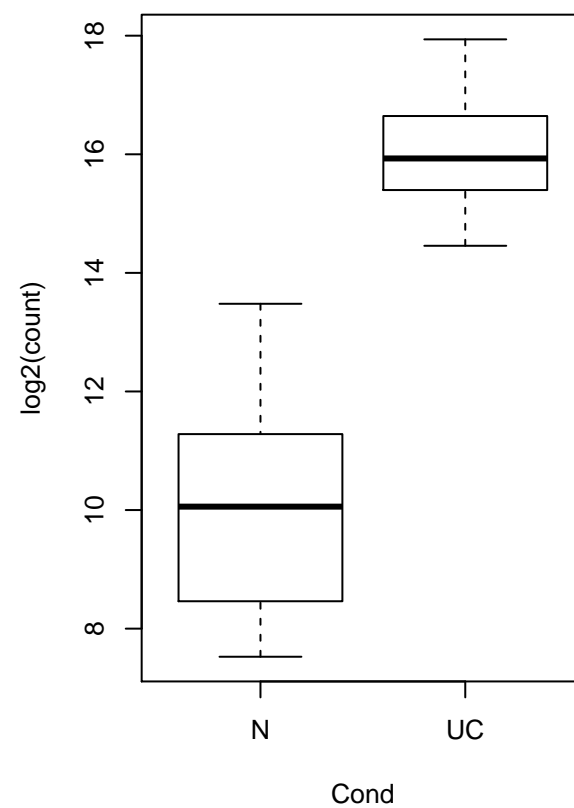

OSM average UC-N %methylation max=-33.05% min=-36.44%

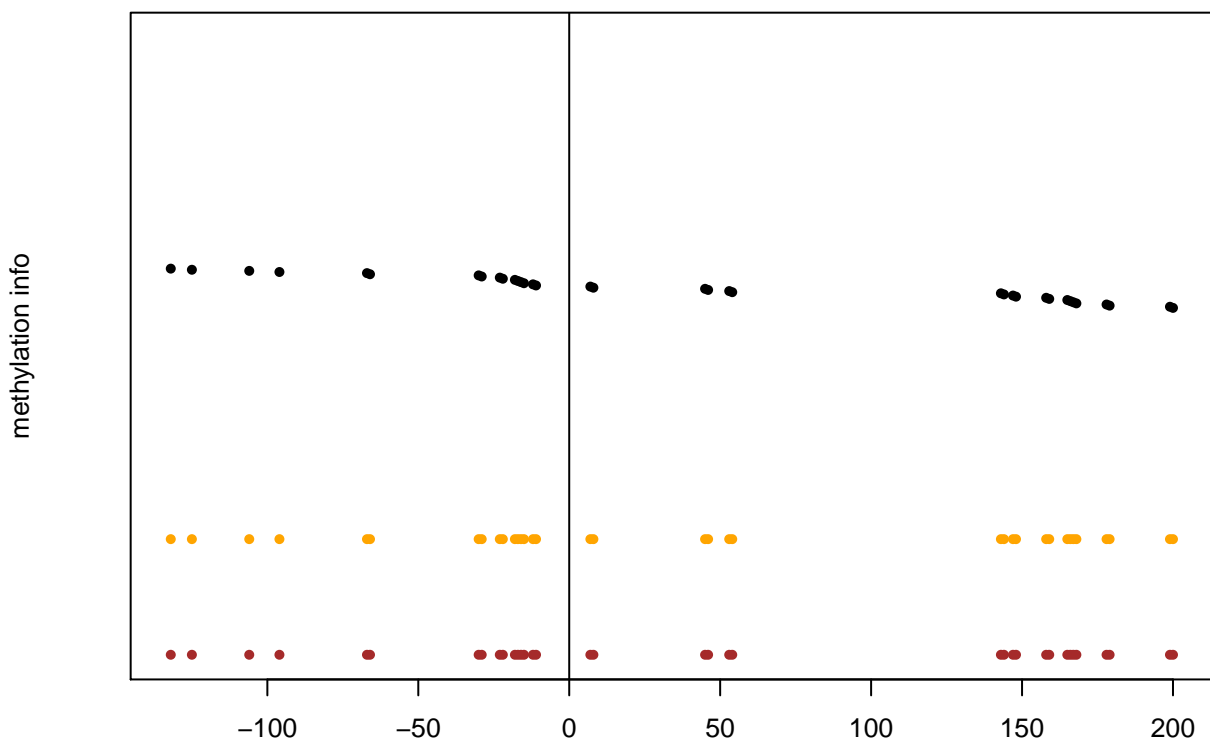

OSM raw %methylation, red=UC, blue=Normal

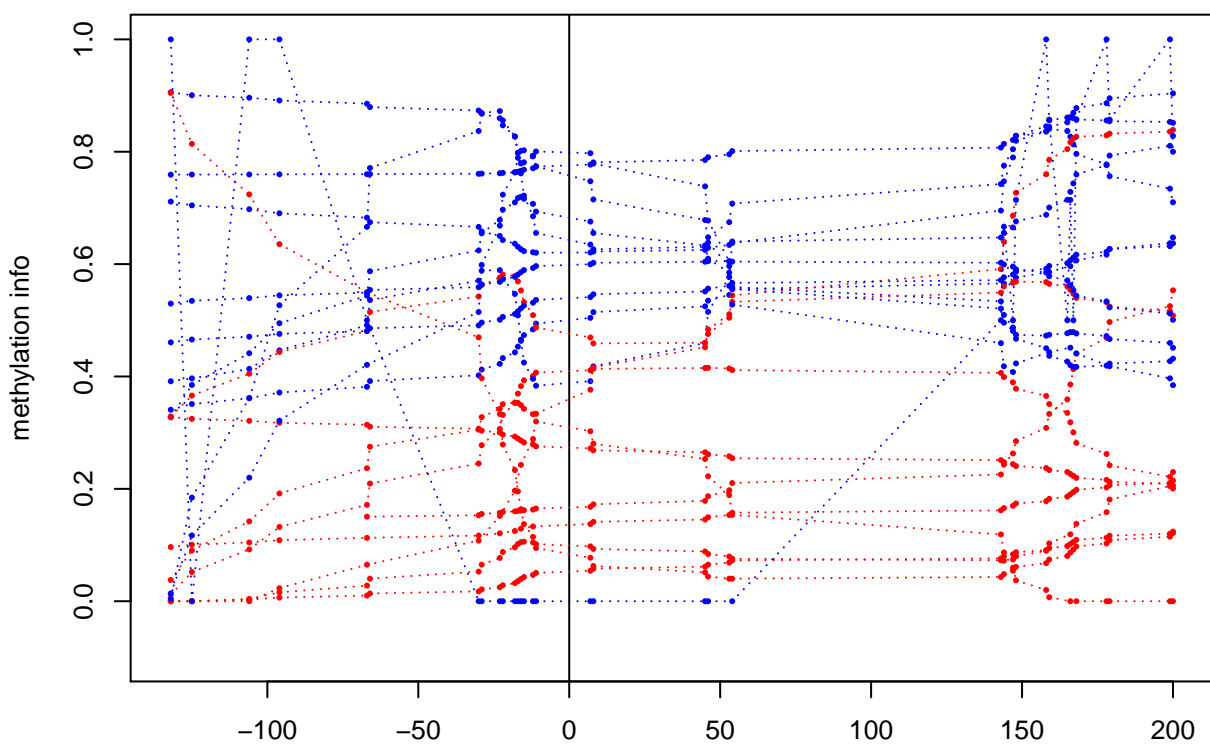

RNAseq logFC(UC-N)= 3.1

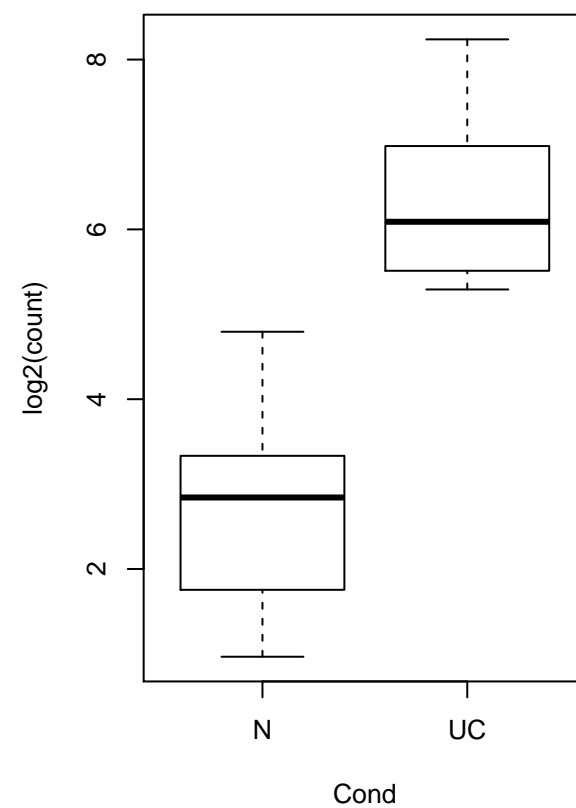

OSMR average UC-N %methylation max=5.8% min=-10.4%

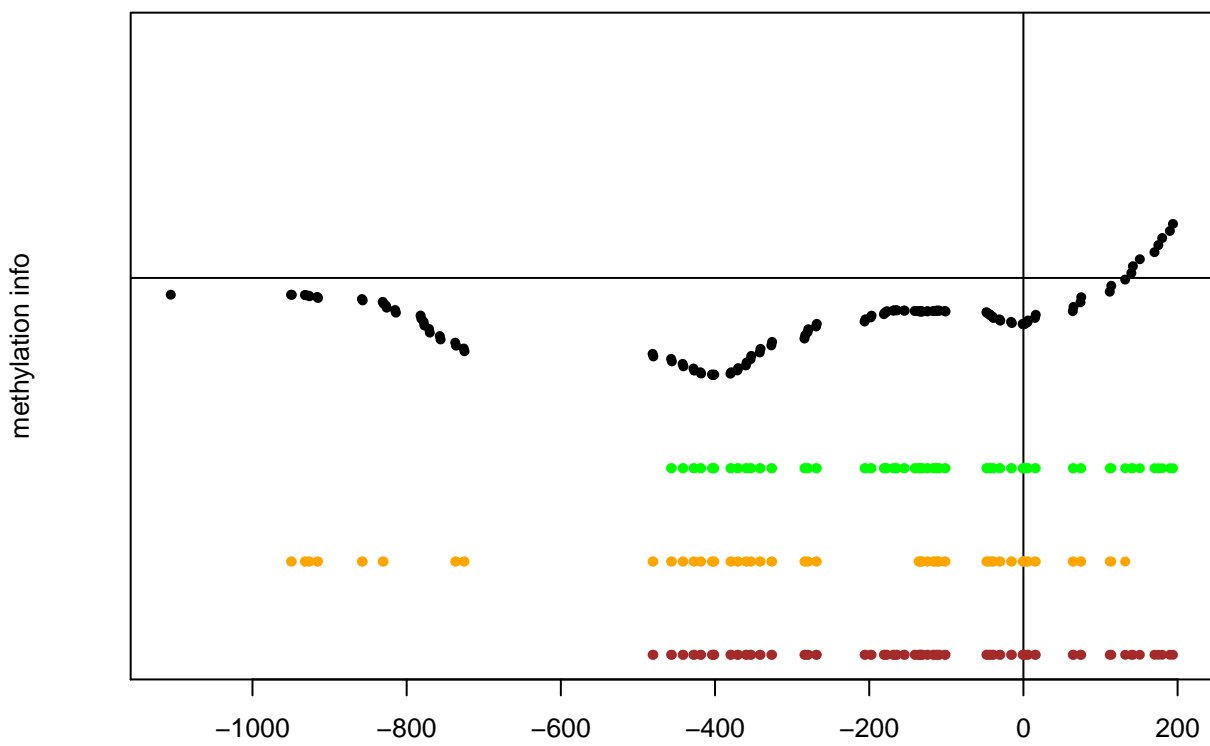

OSMR raw %methylation, red=UC, blue=Normal

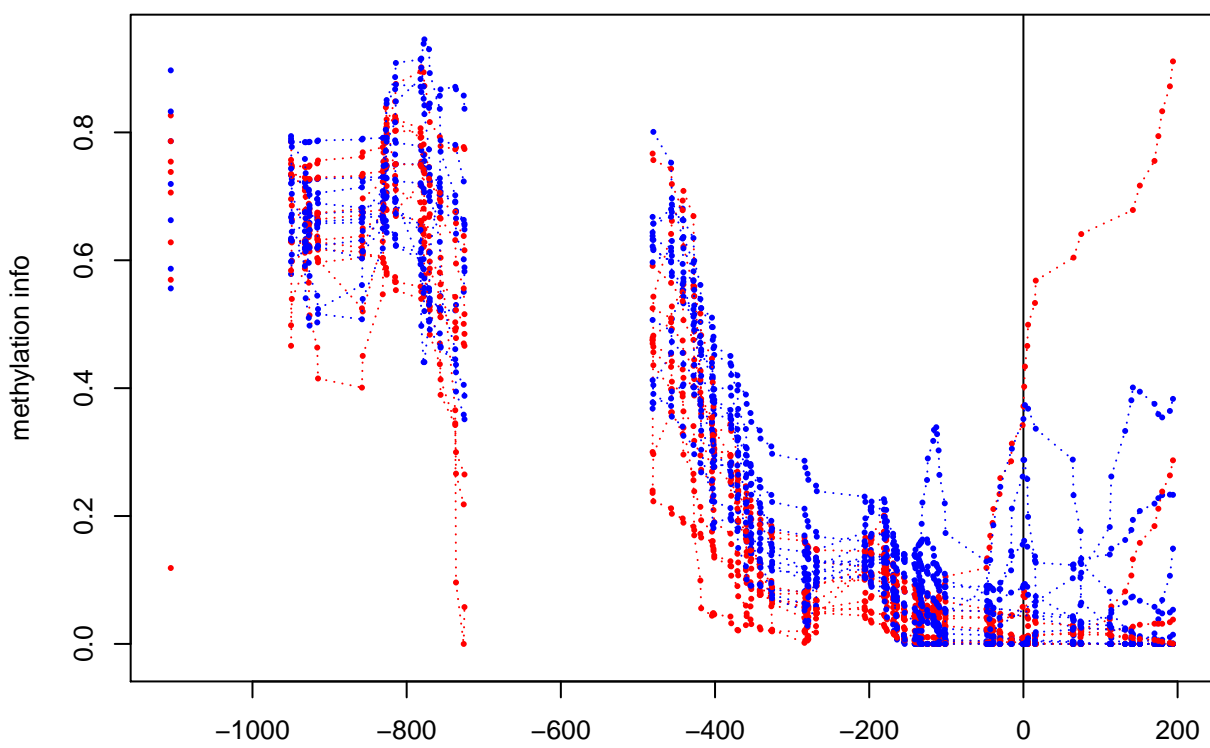

RNAseq logFC(UC-N)= 1.1

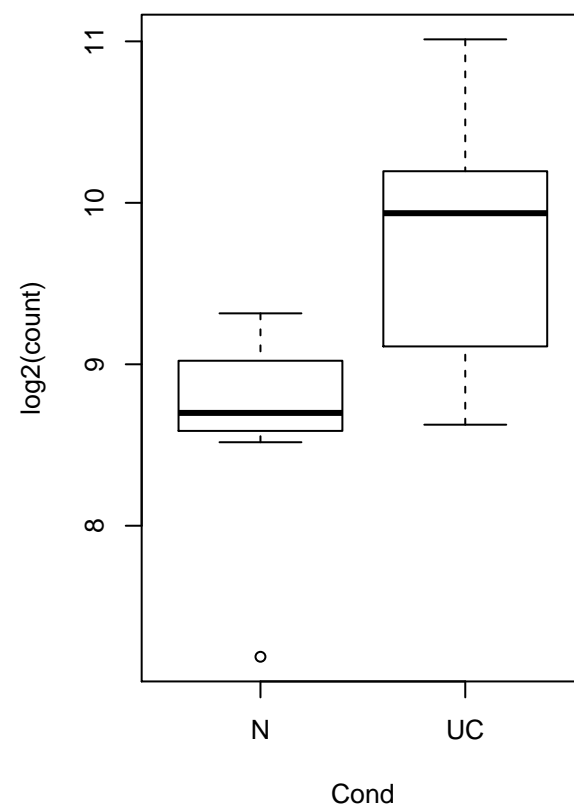

OTC average UC-N %methylation max=11.77% min=3.99%

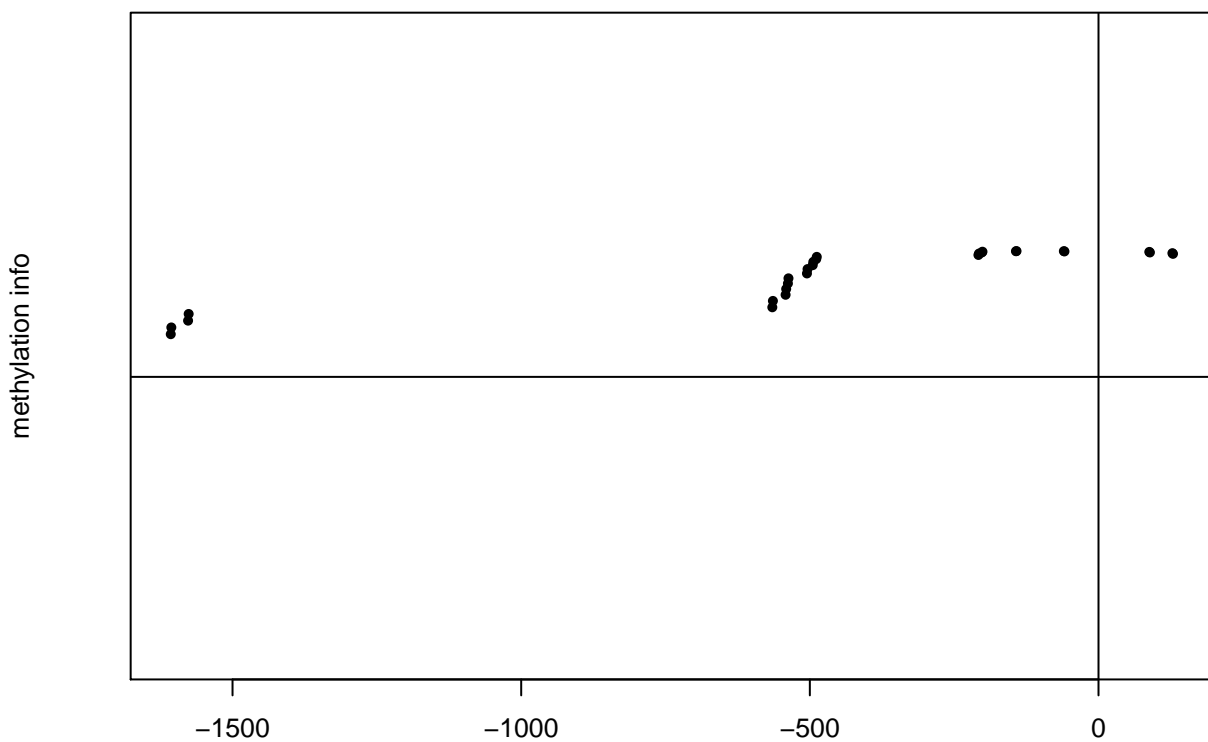

OTC raw %methylation, red=UC, blue=Normal

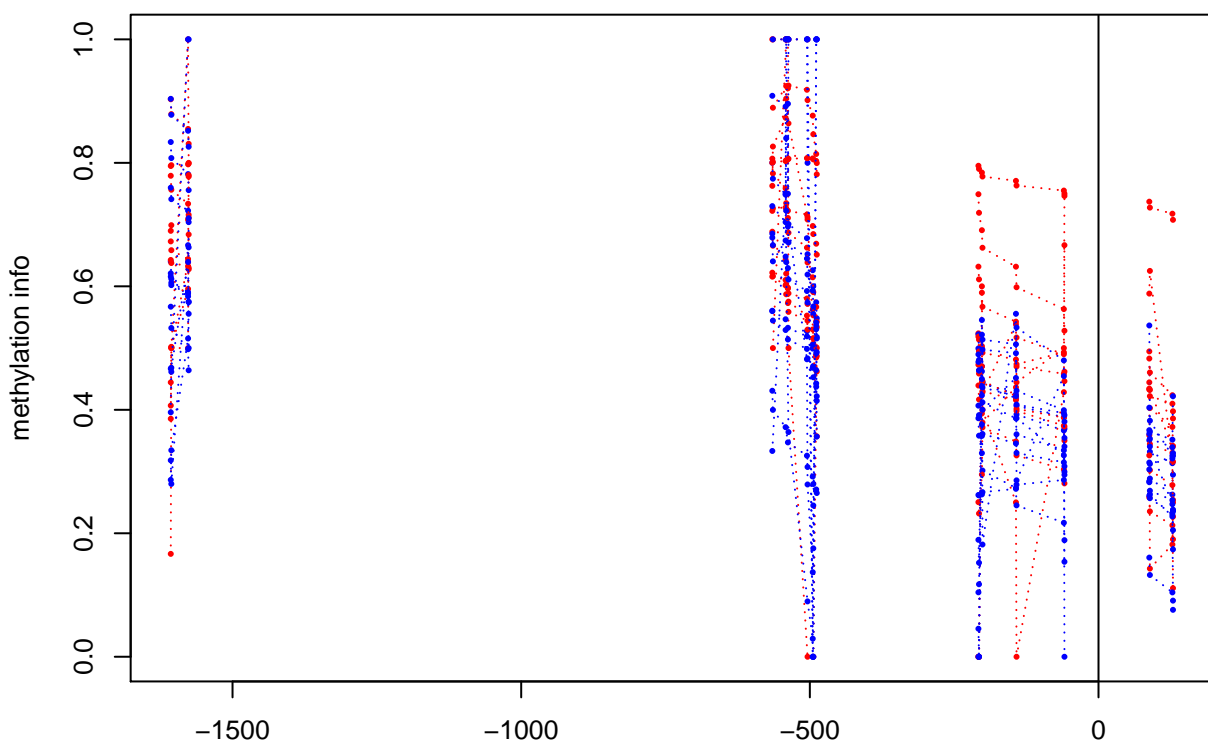

RNAseq logFC(UC-N)= -1.68

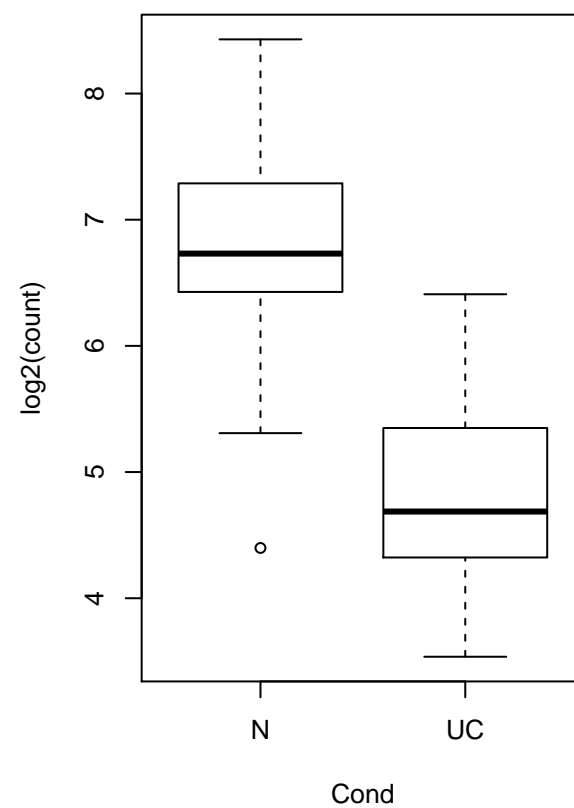

PAPLN average UC-N %methylation max=-0.33% min=-34.53%

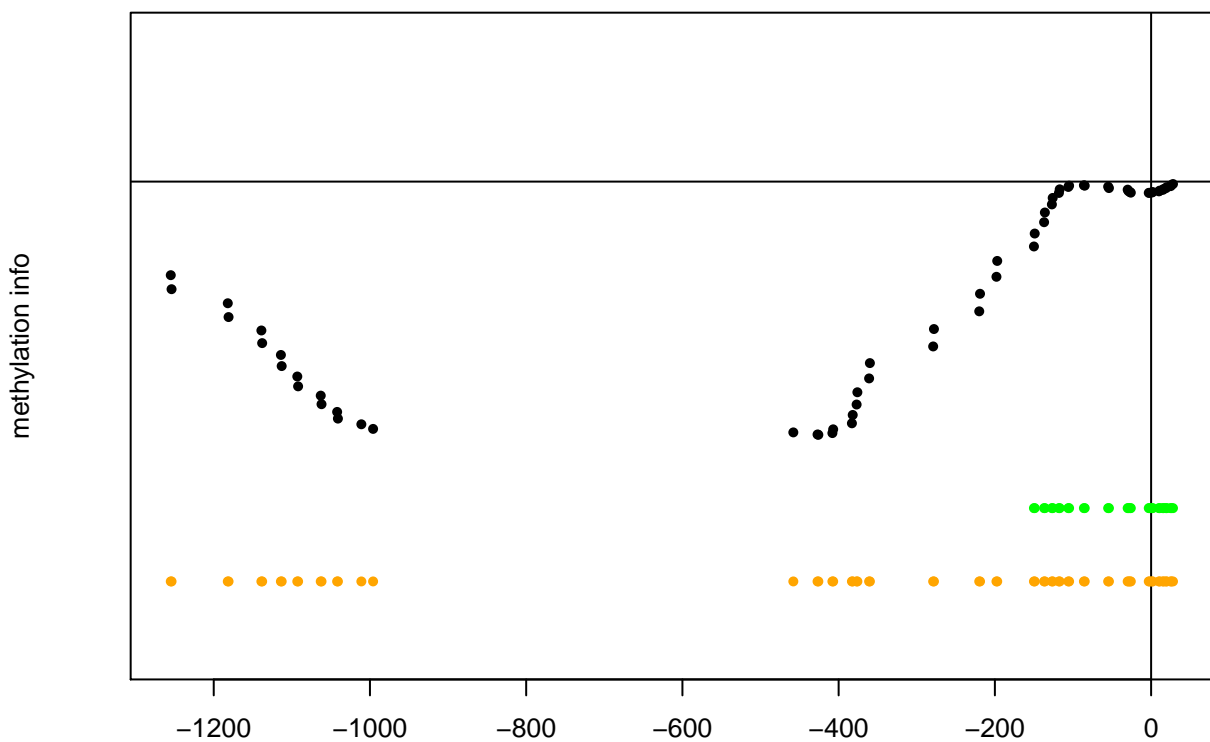

PAPLN raw %methylation, red=UC, blue=Normal

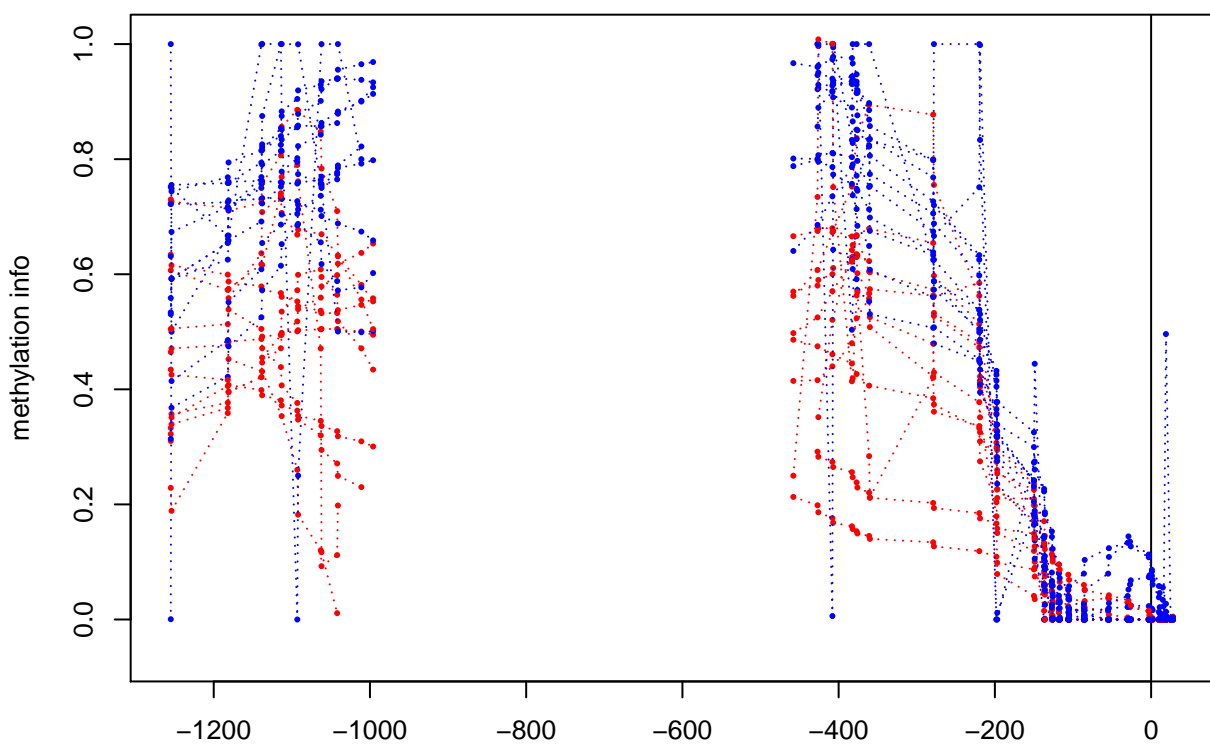

RNAseq logFC(UC-N)= 1.08

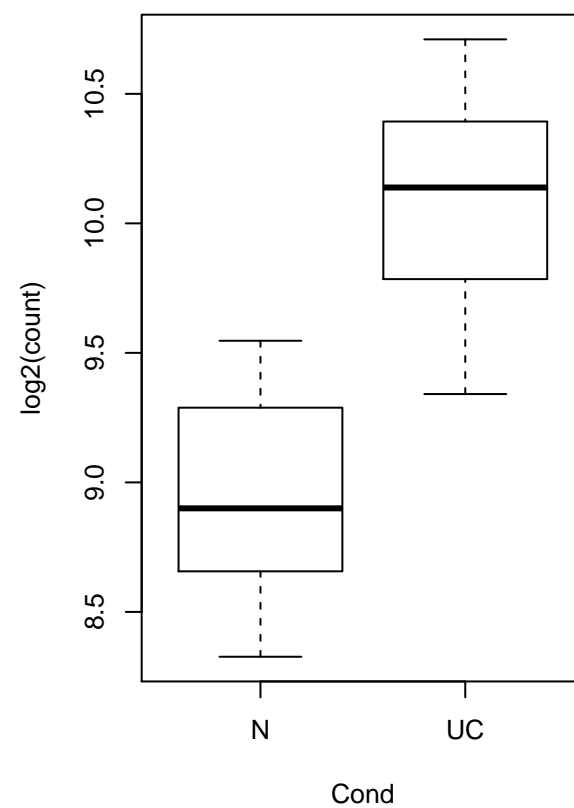

PARP15 average UC-N %methylation max=-0.64% min=-15.75%

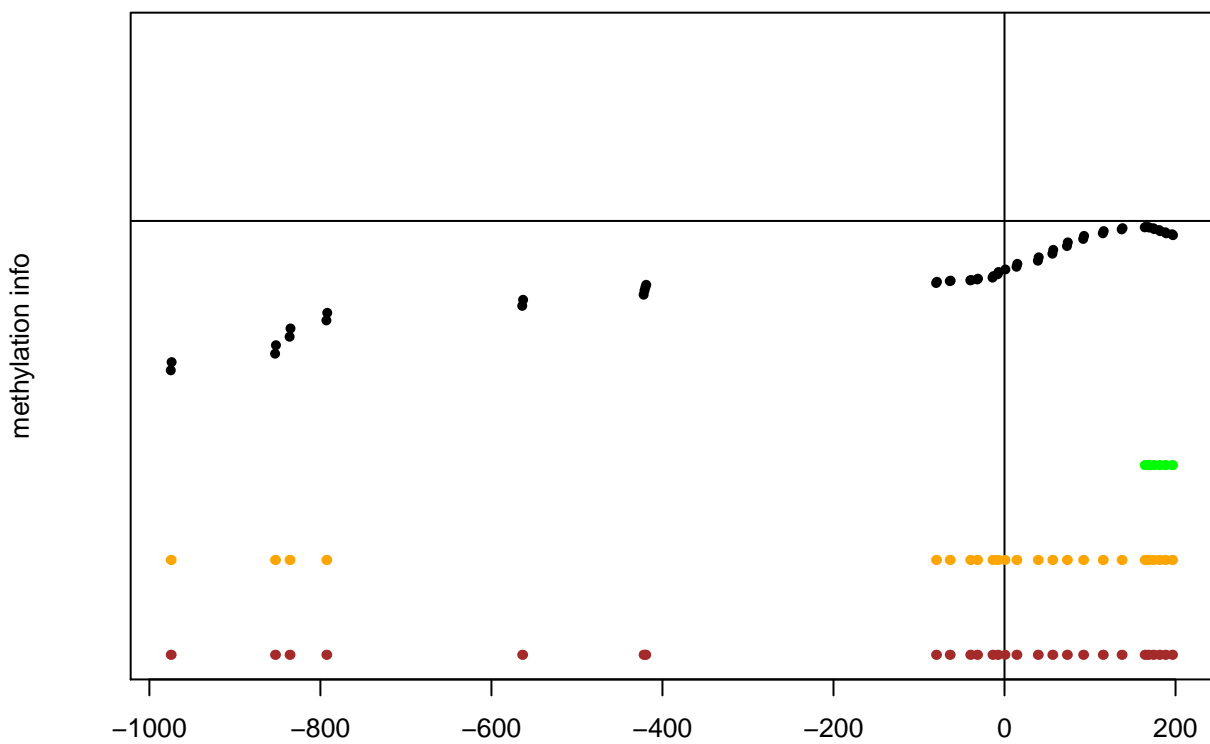

PARP15 raw %methylation, red=UC, blue=Normal

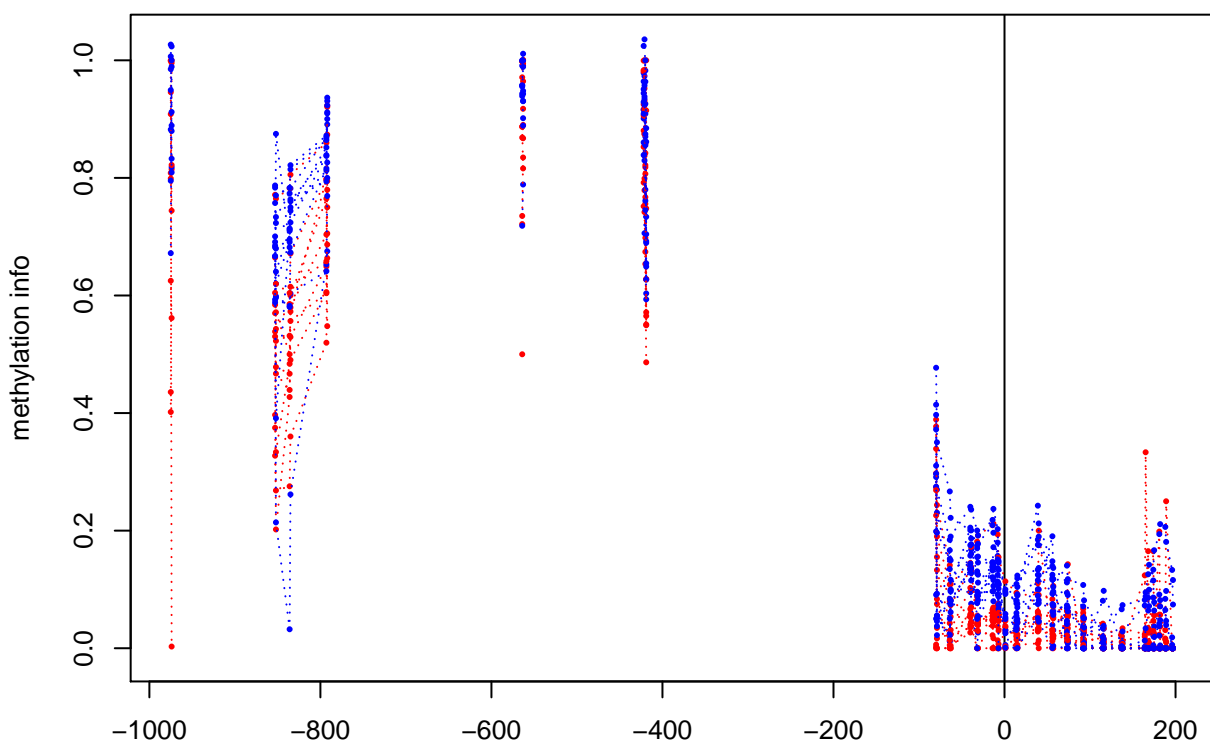

RNAseq logFC(UC-N)= 1.59

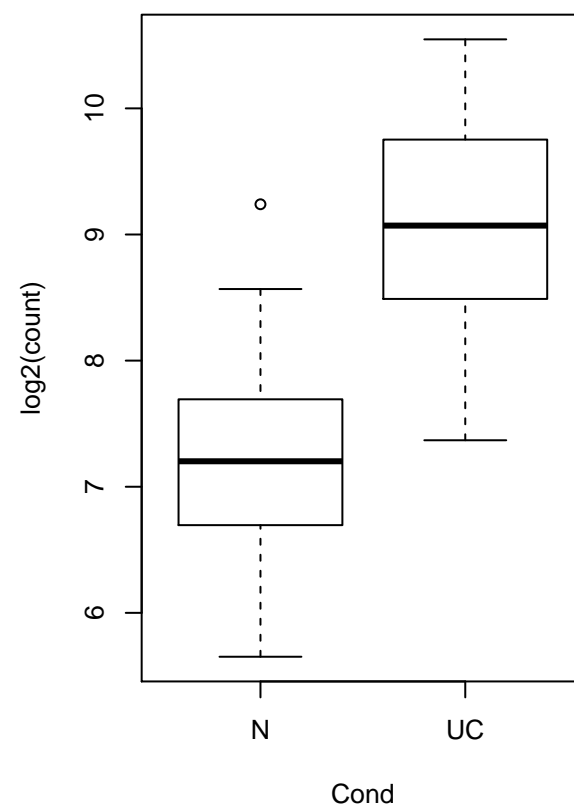

PCDH17 average UC-N %methylation max=-3.13% min=-13.26%

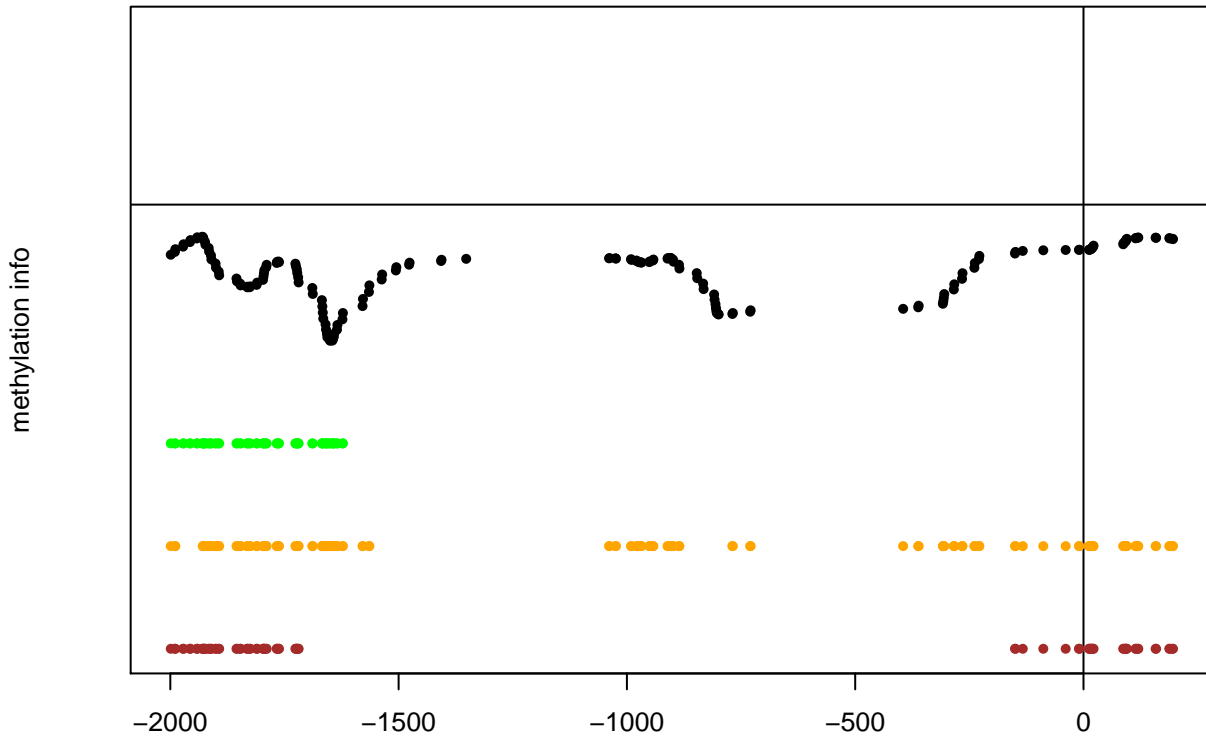

PCDH17 raw %methylation, red=UC, blue=Normal

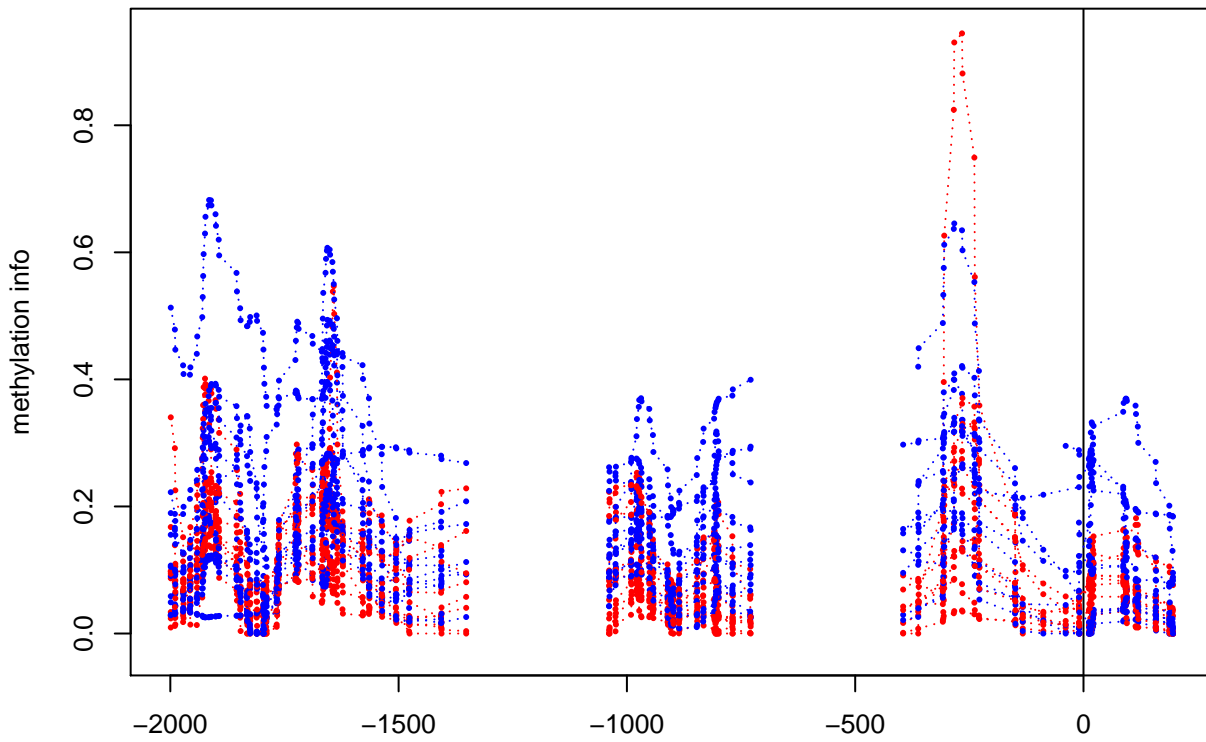

RNAseq logFC(UC-N)= 1.49

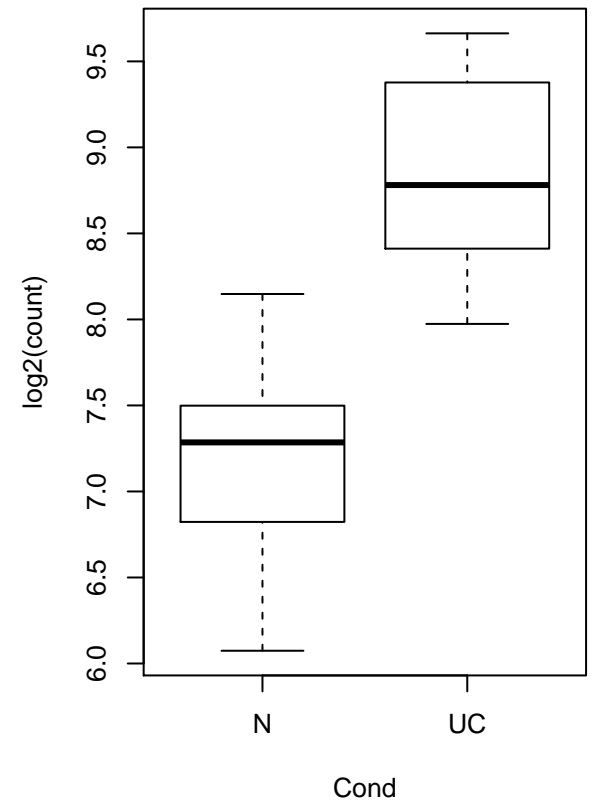

PCED1B average UC-N %methylation max=-31.56% min=-40.61%

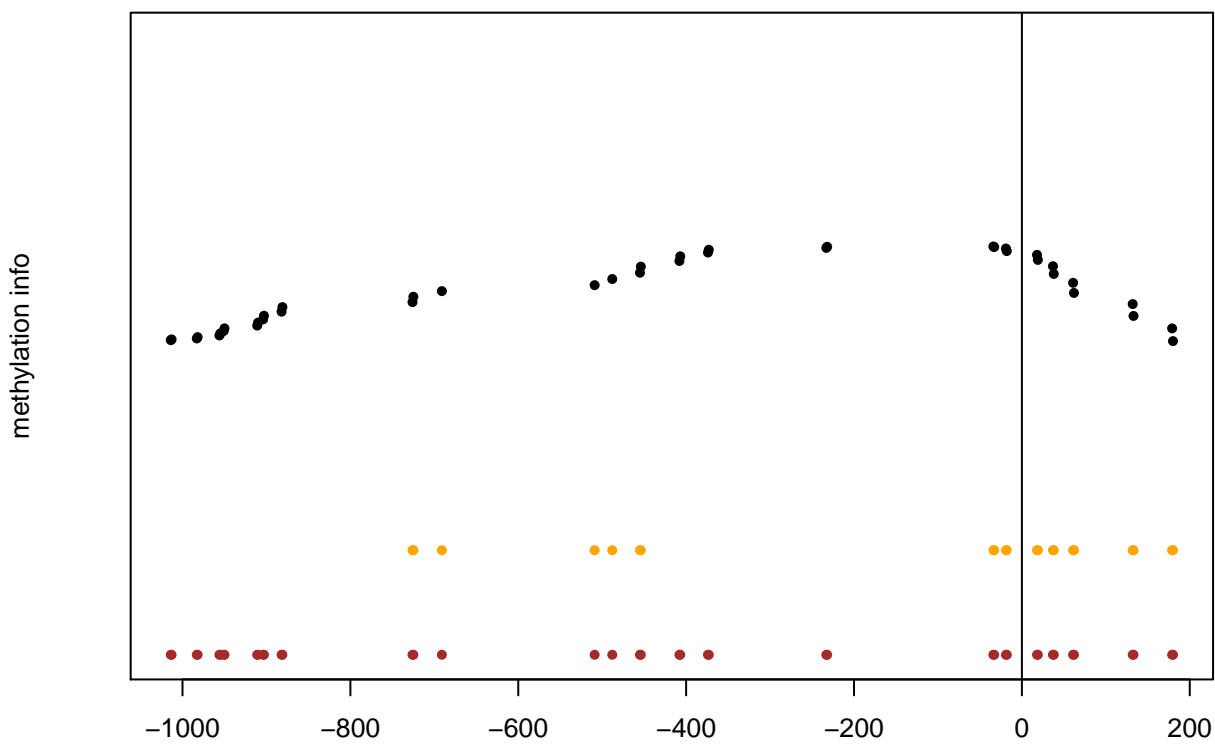

PCED1B raw %methylation, red=UC, blue=Normal

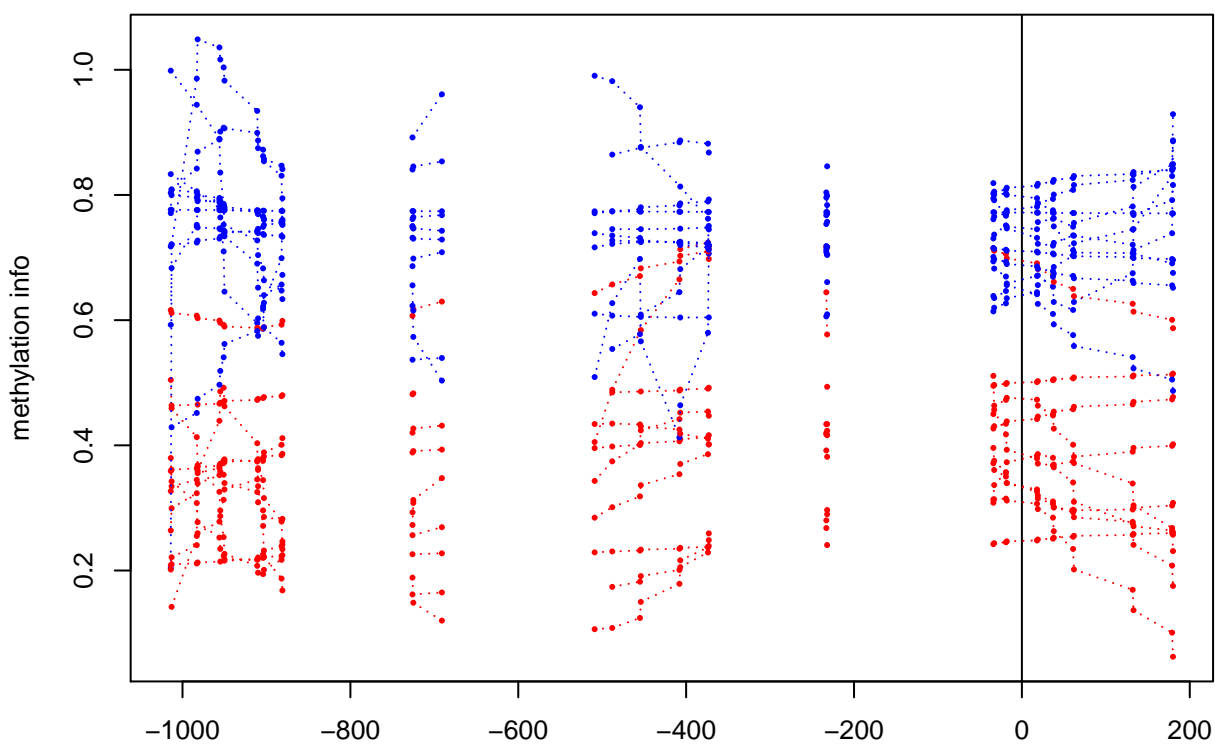

RNAseq logFC(UC-N)= 1.25

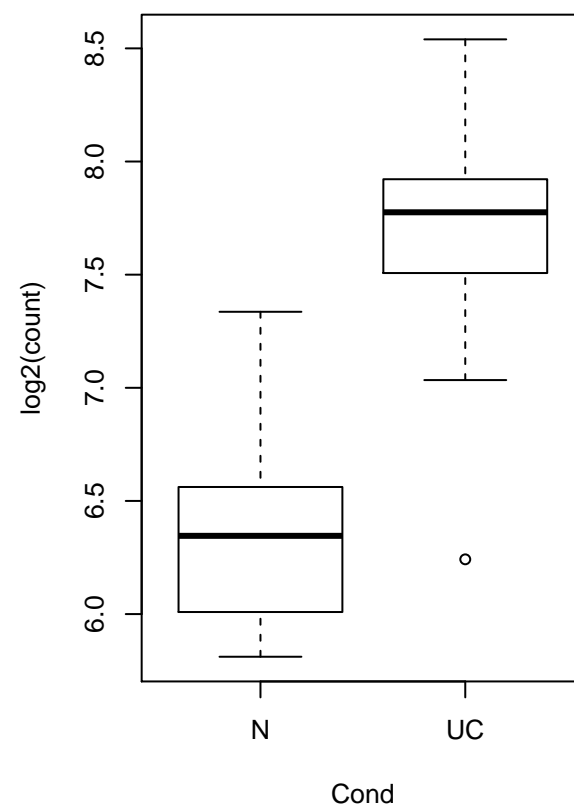



PCK1 average UC-N %methylation max=16.58% min=2.4%

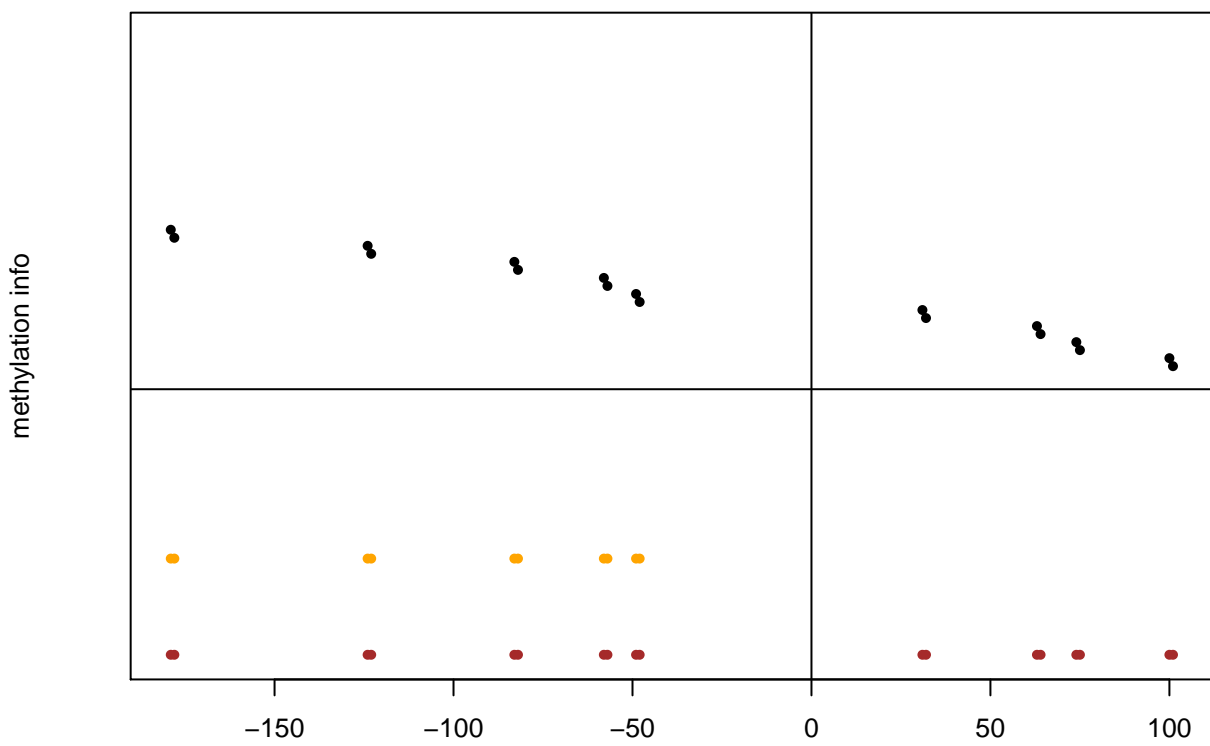

PCK1 raw %methylation, red=UC, blue=Normal

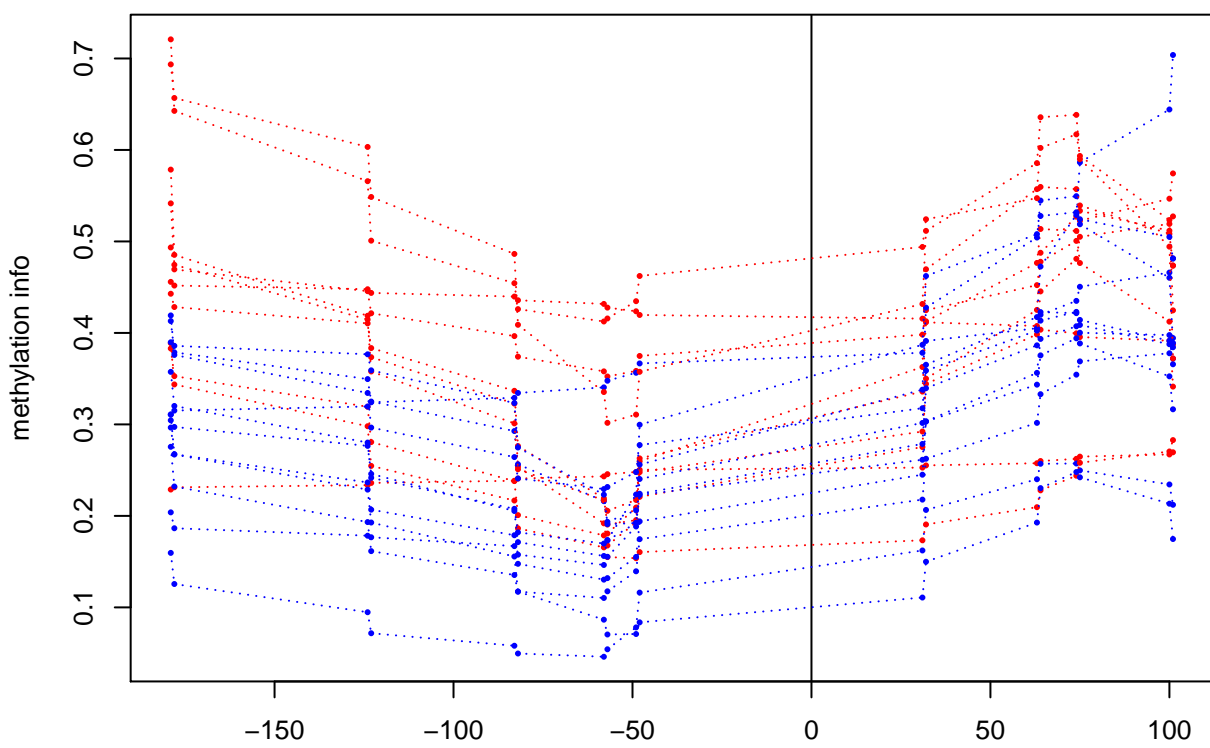

RNAseq logFC(UC-N)= -2.18

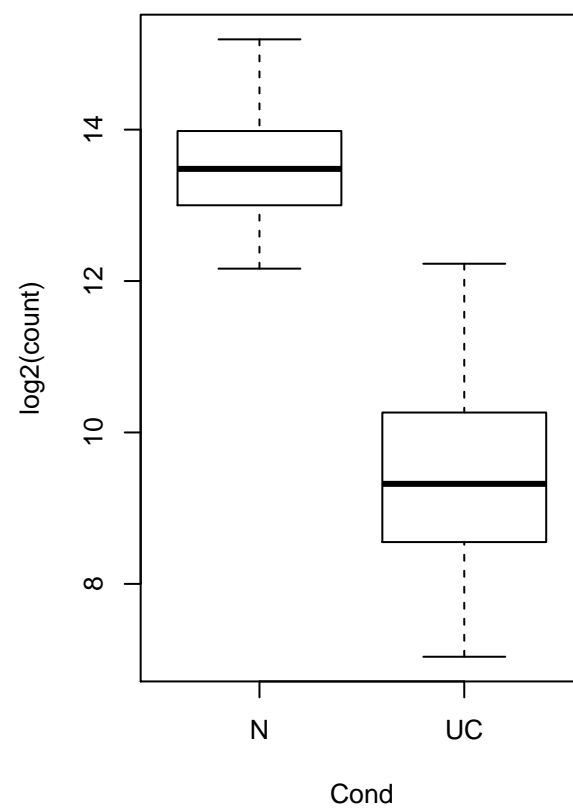

PCSK1 average UC-N %methylation max=3.24% min=-12.76%

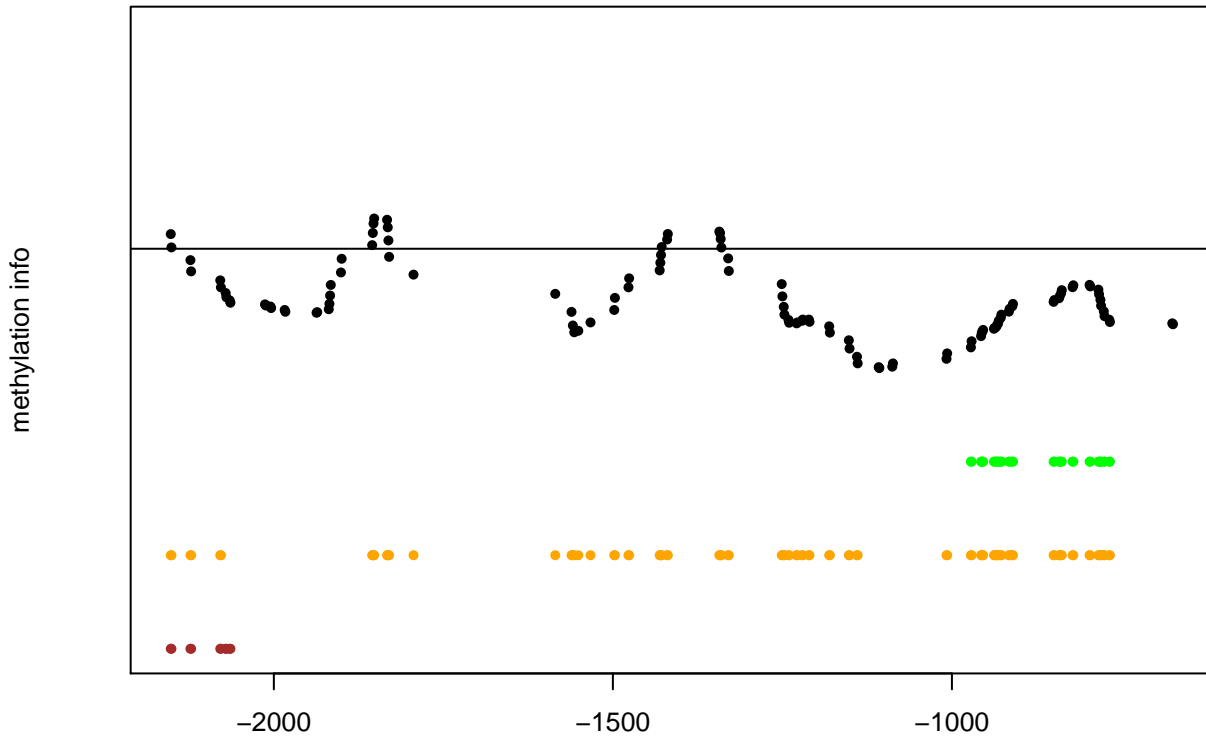

PCSK1 raw %methylation, red=UC, blue=Normal

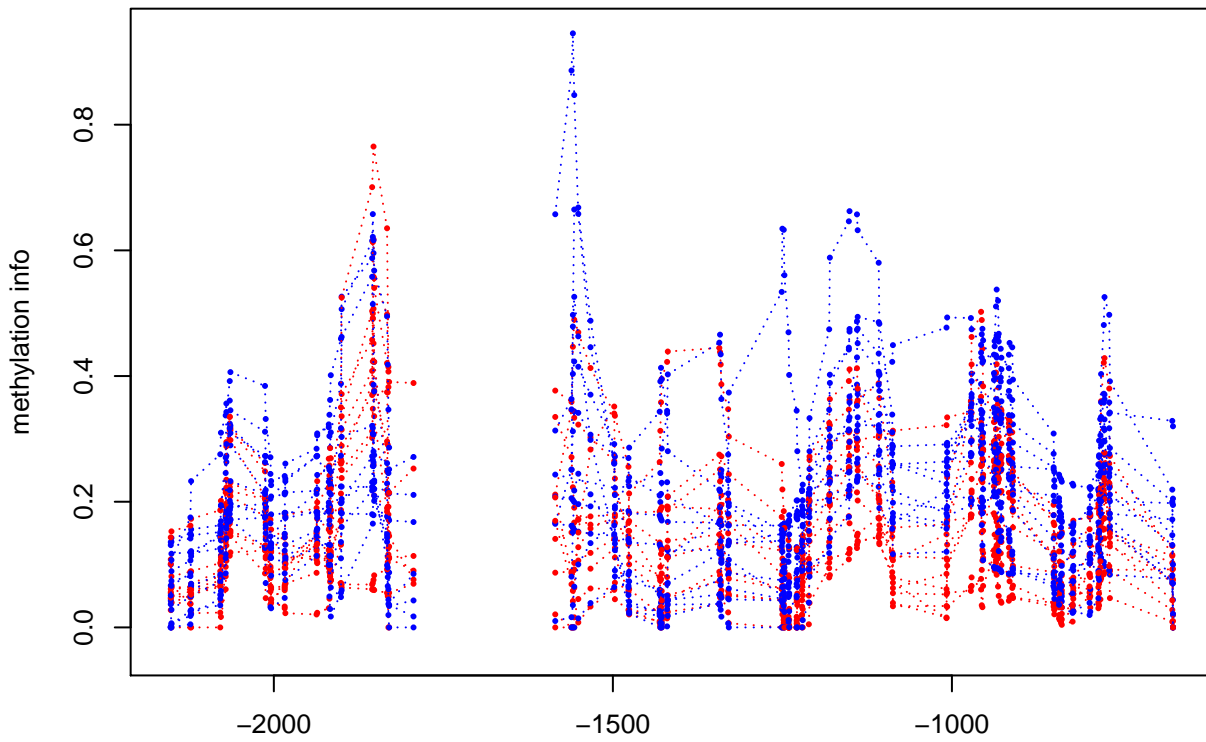

RNAseq logFC(UC-N)= 1.97

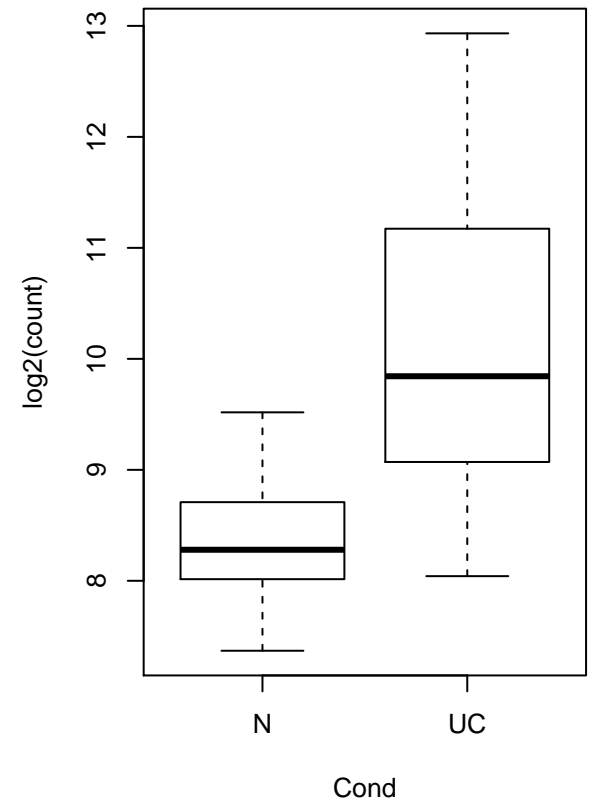

PDPN average UC-N %methylation max=3.56% min=-19.53%

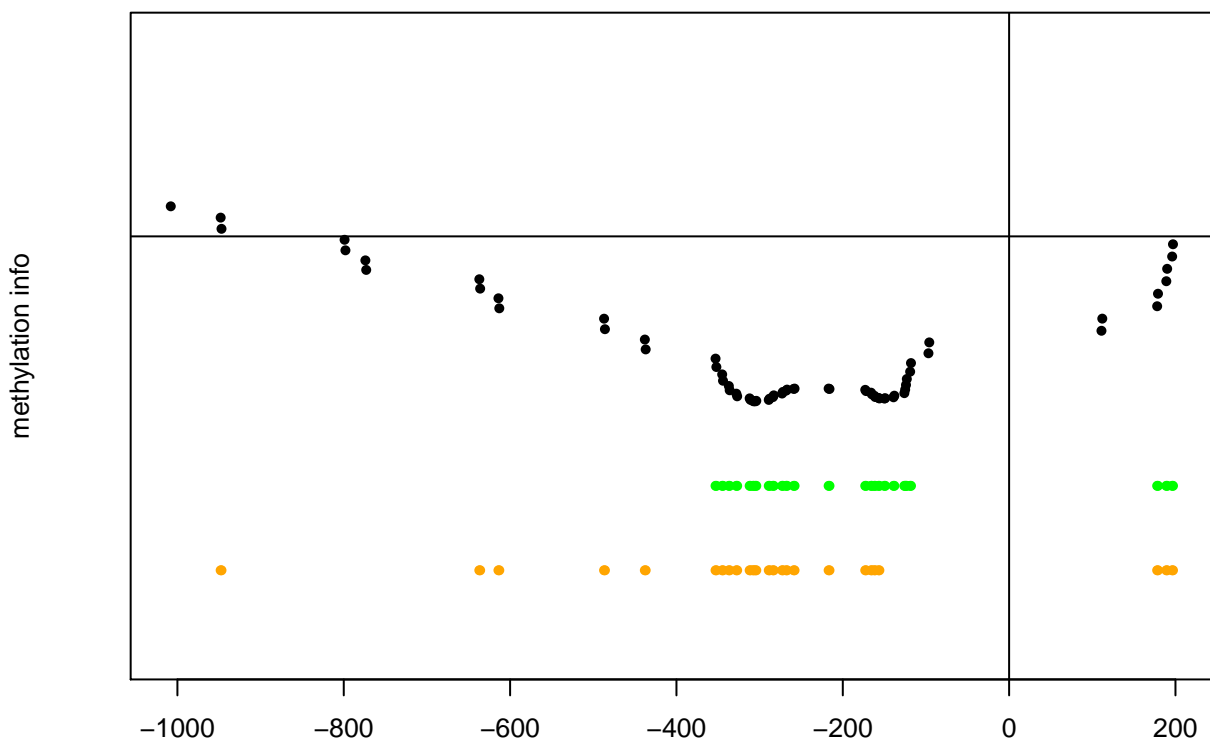

PDPN raw %methylation, red=UC, blue=Normal

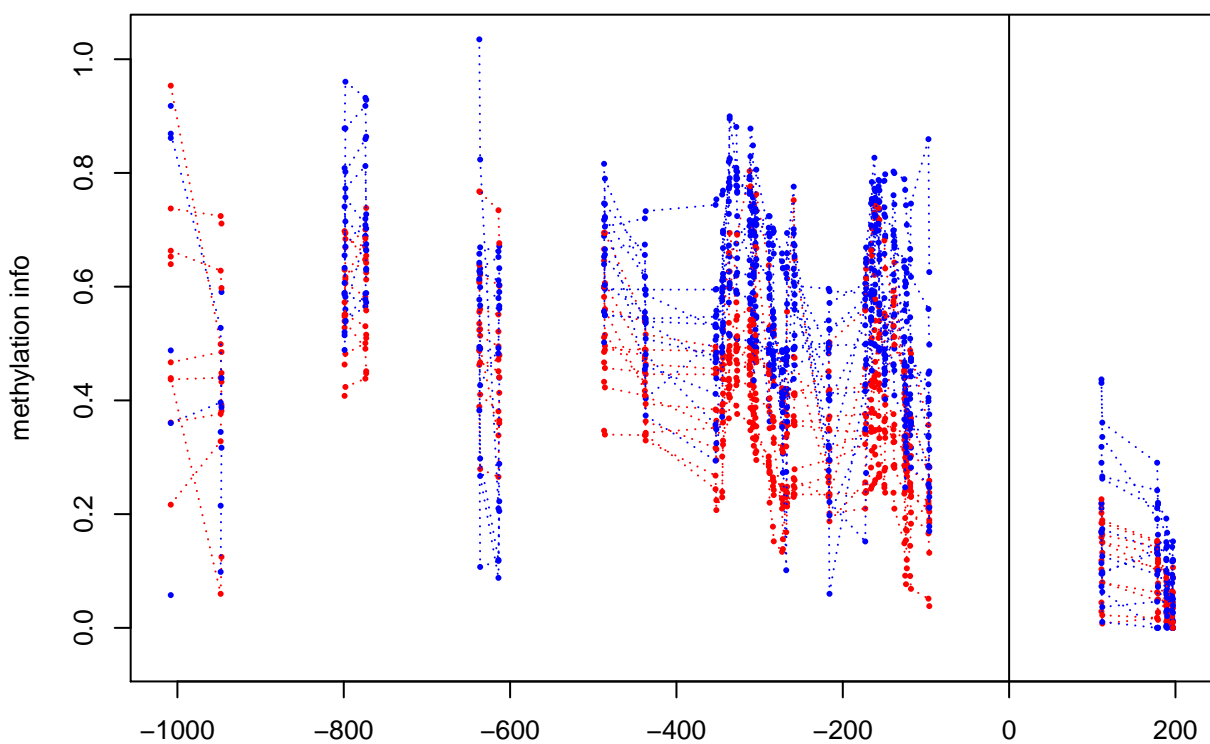

RNAseq logFC(UC-N)= 2.35

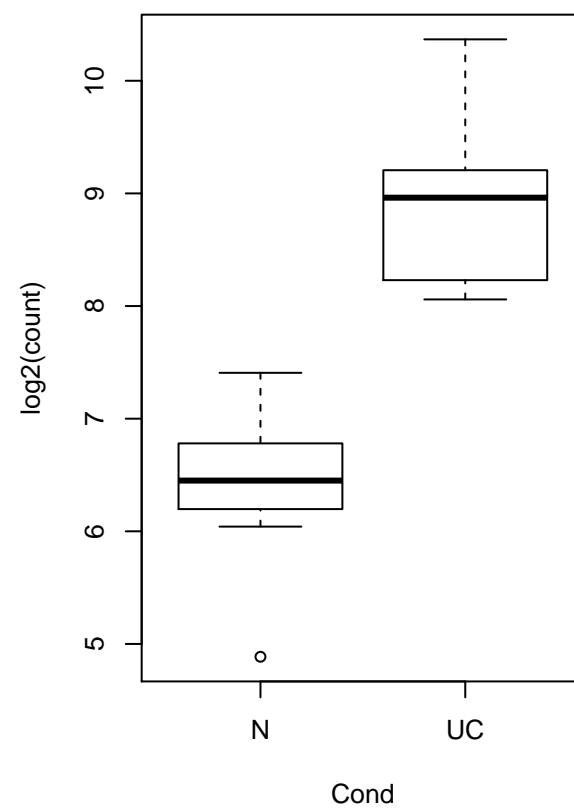

PEA15 average UC-N %methylation max=0.56% min=-24.03%

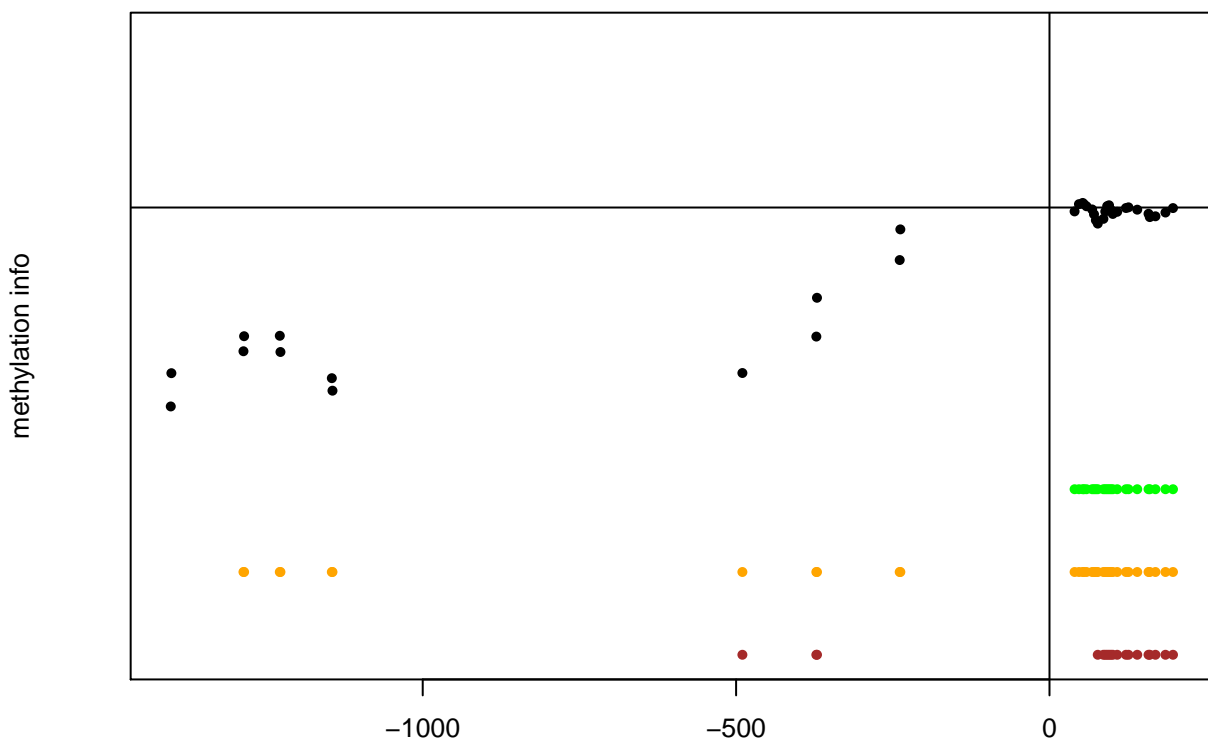

PEA15 raw %methylation, red=UC, blue=Normal

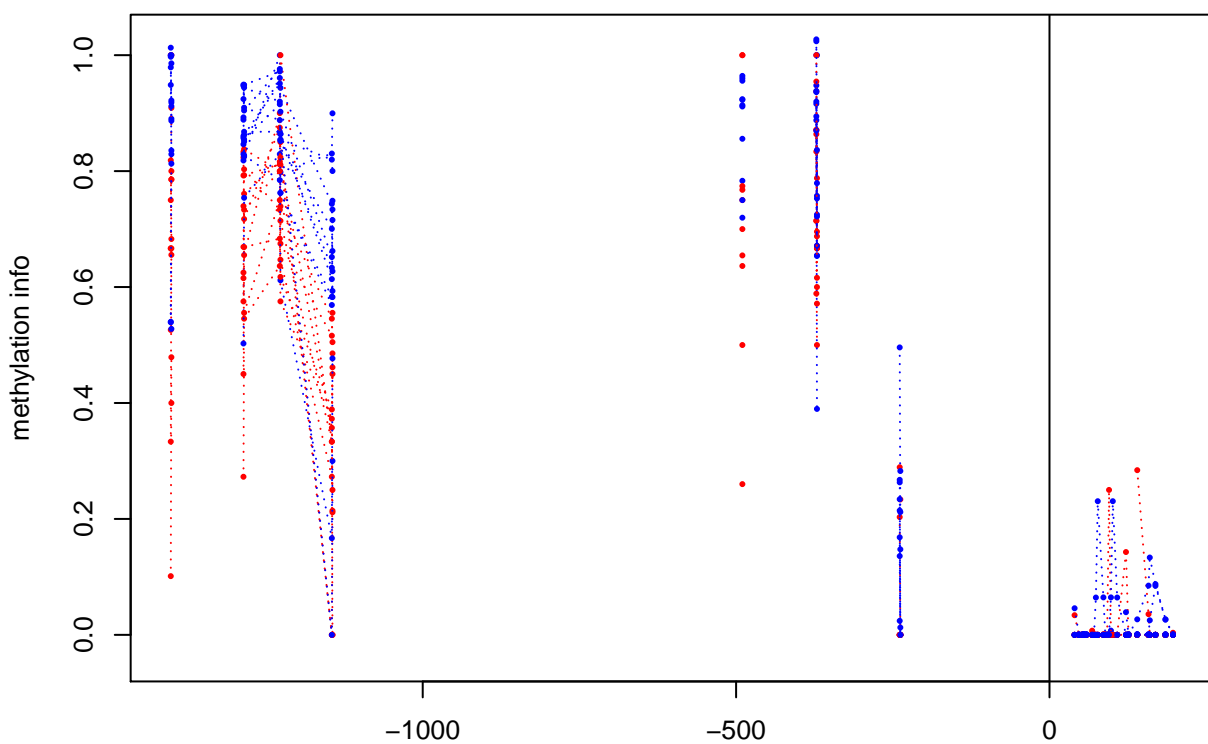

RNAseq logFC(UC-N)= 1.17

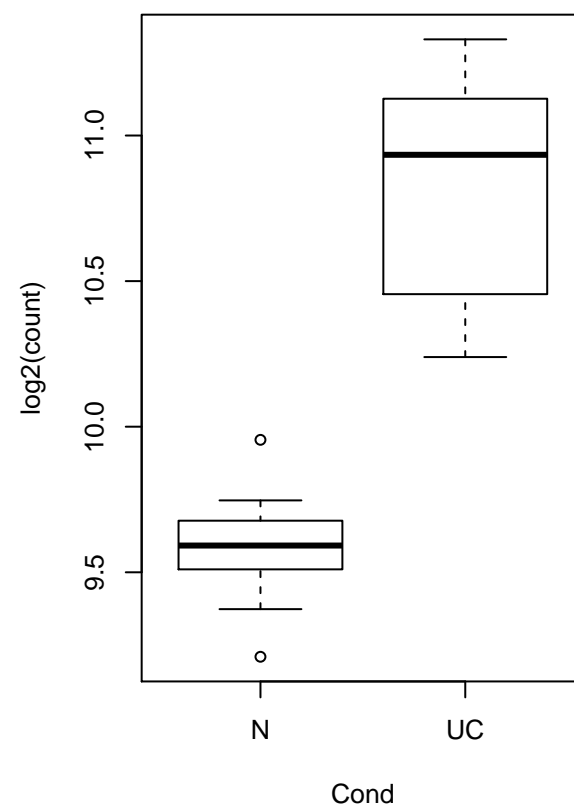

PI3 average UC-N %methylation max=6.91% min=-31.31%

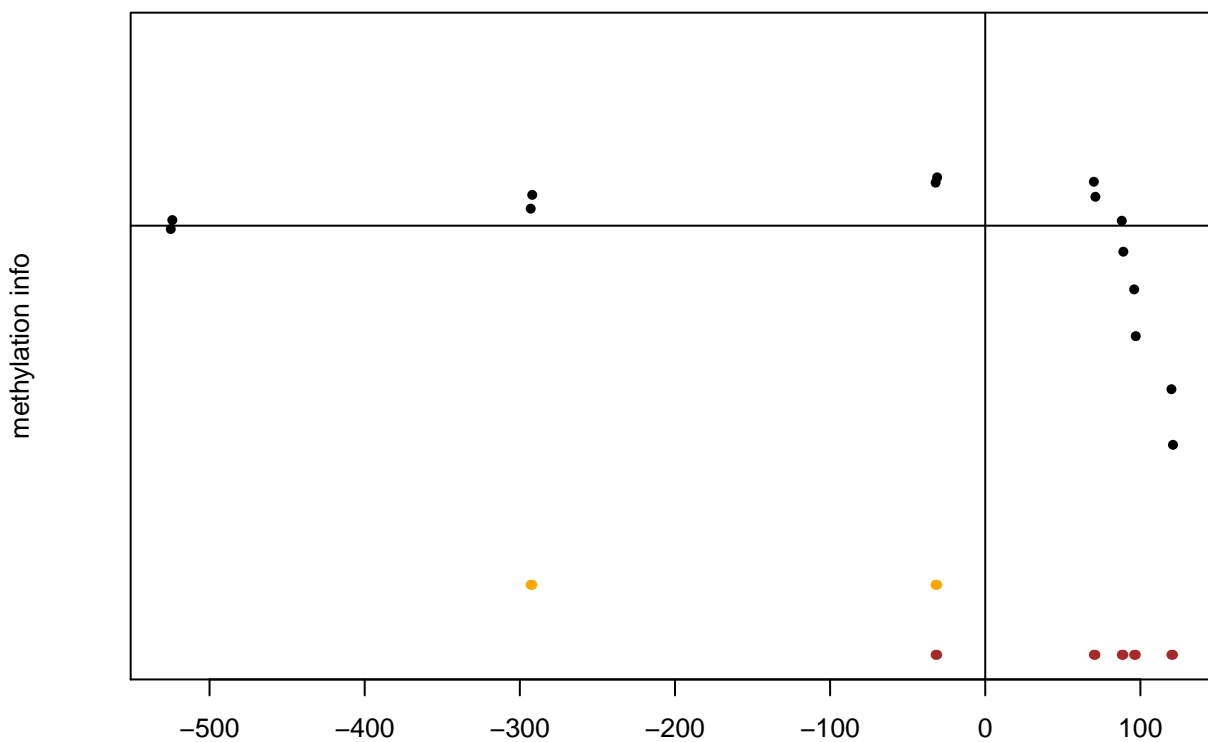

PI3 raw %methylation, red=UC, blue=Normal

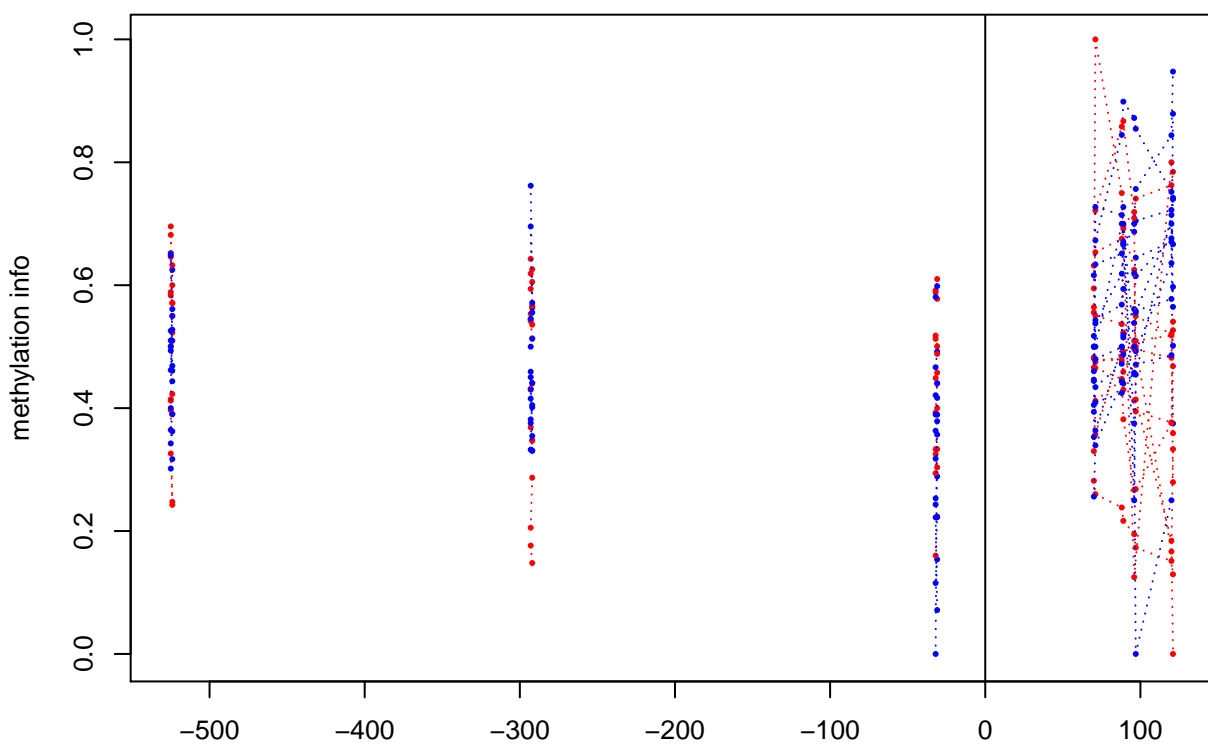

RNAseq logFC(UC-N)= 4.11

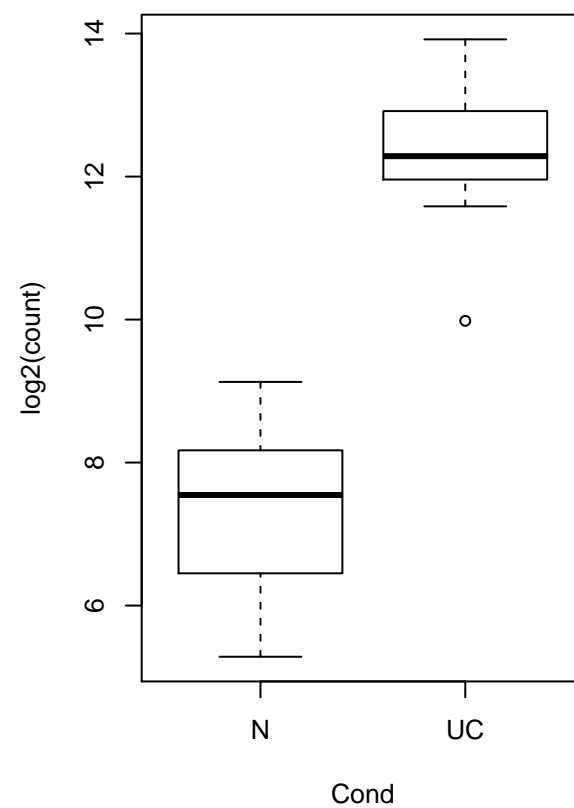

PIK3CD average UC-N %methylation max=6.13% min=-26.45%

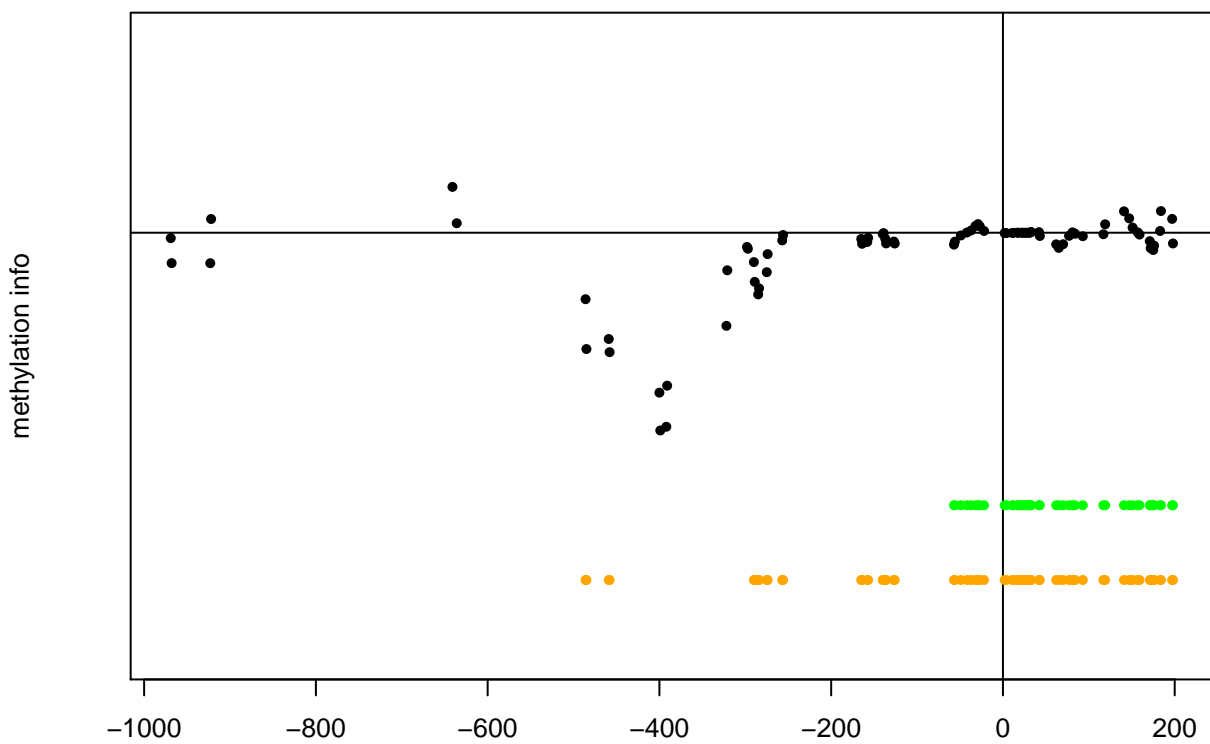

PIK3CD raw %methylation, red=UC, blue=Normal

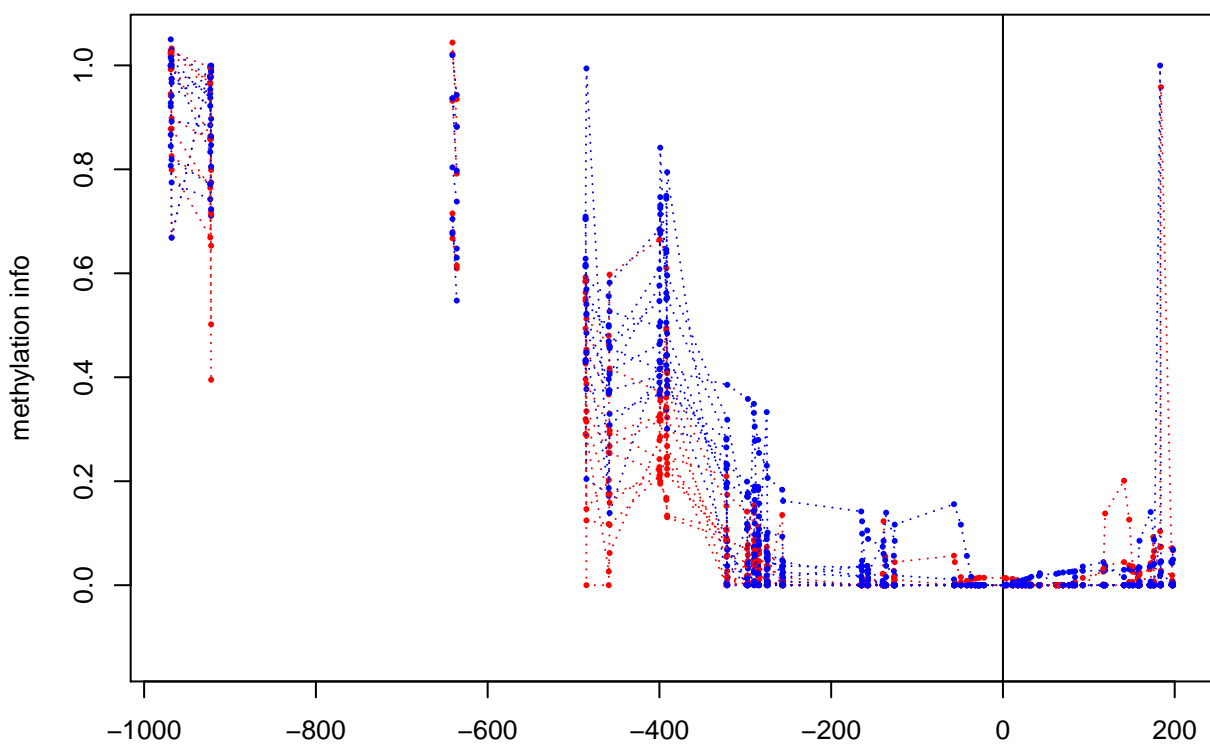

RNAseq logFC(UC-N)= 1.35

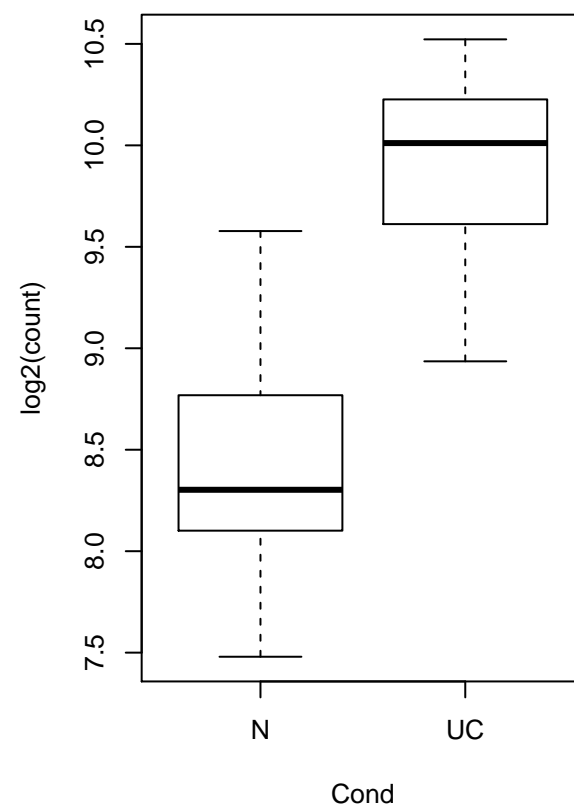

PITPNC1 average UC-N %methylation max=6.66% min=-16.39%

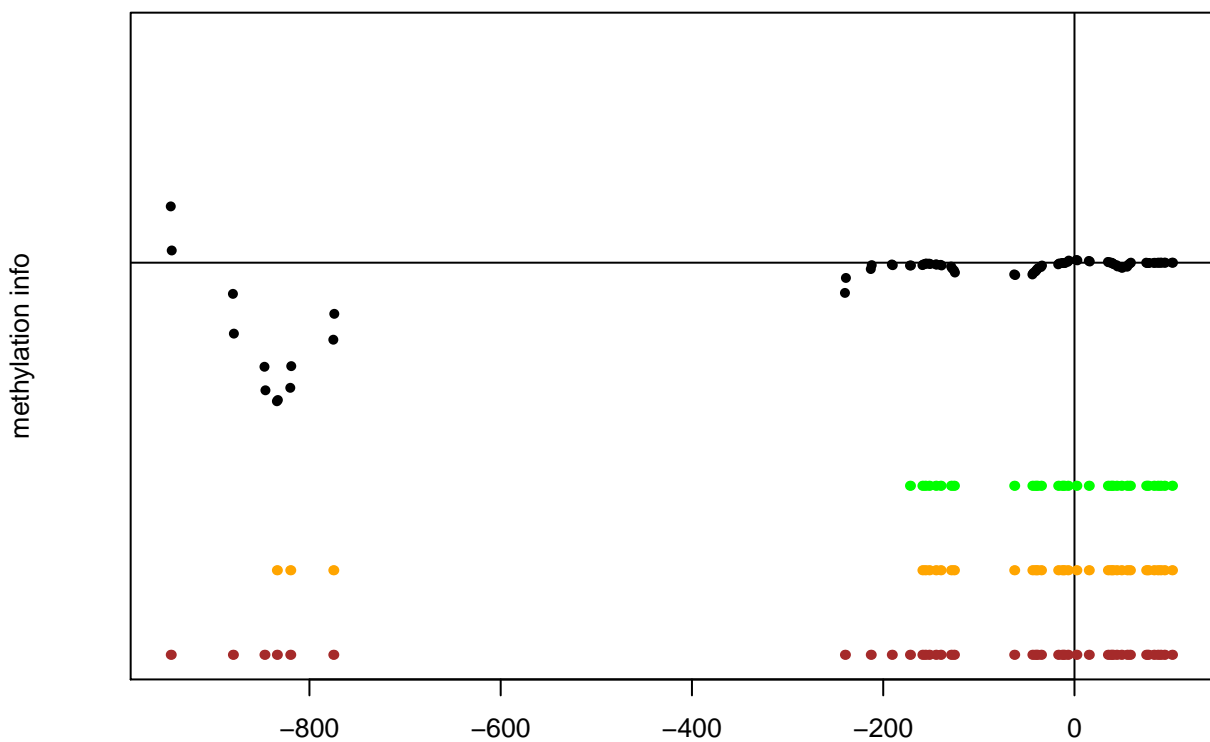

PITPNC1 raw %methylation, red=UC, blue=Normal

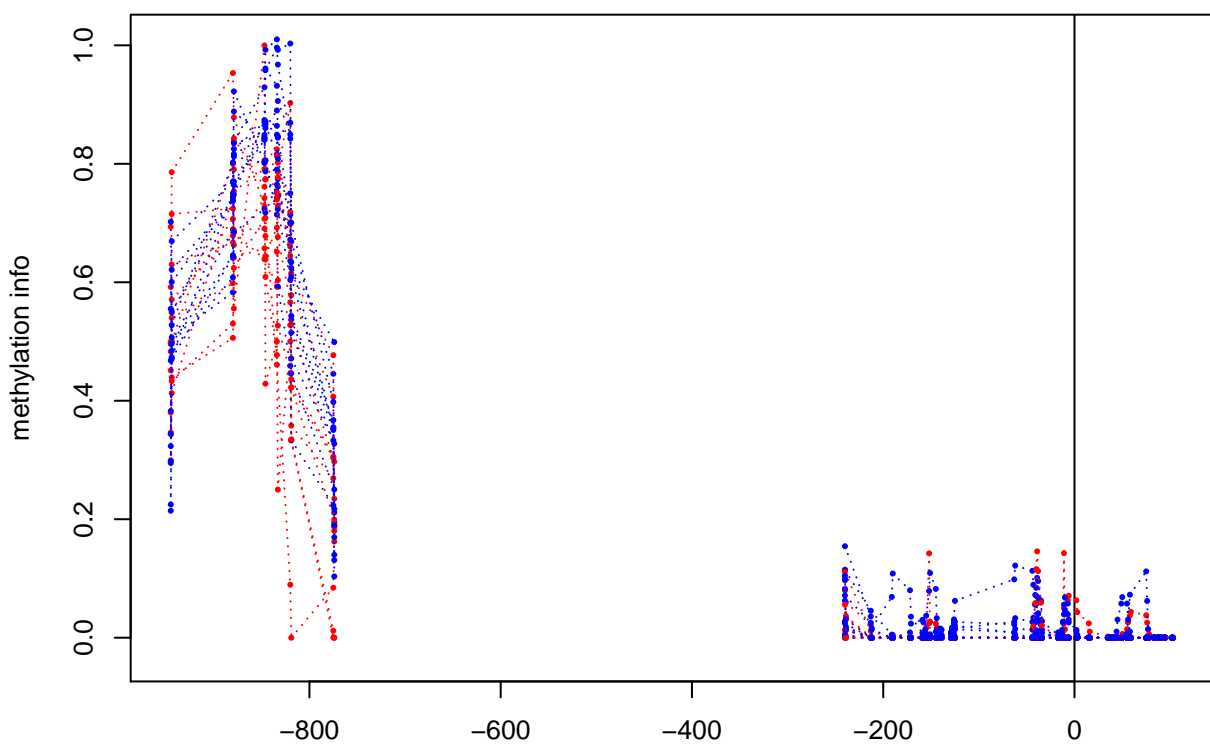

RNAseq logFC(UC-N)= 1.36

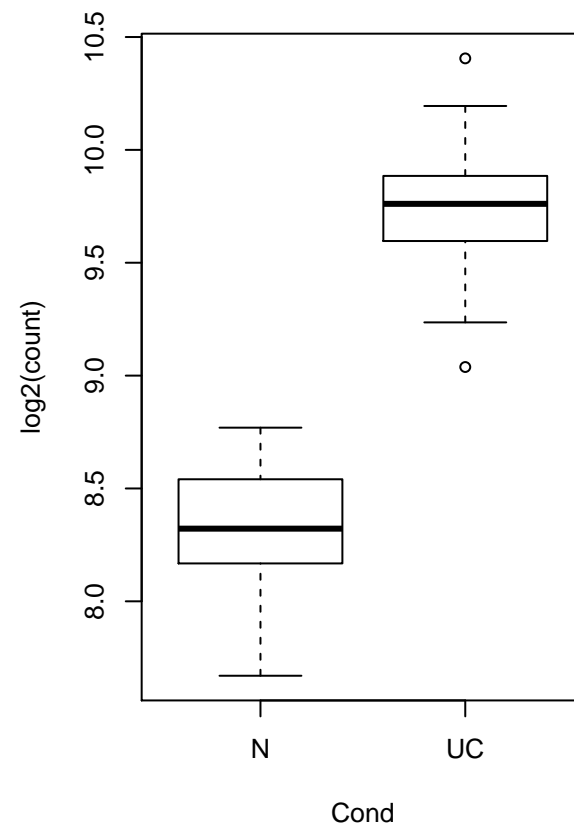

PLA1A average UC-N %methylation max=11.57% min=-15.33%

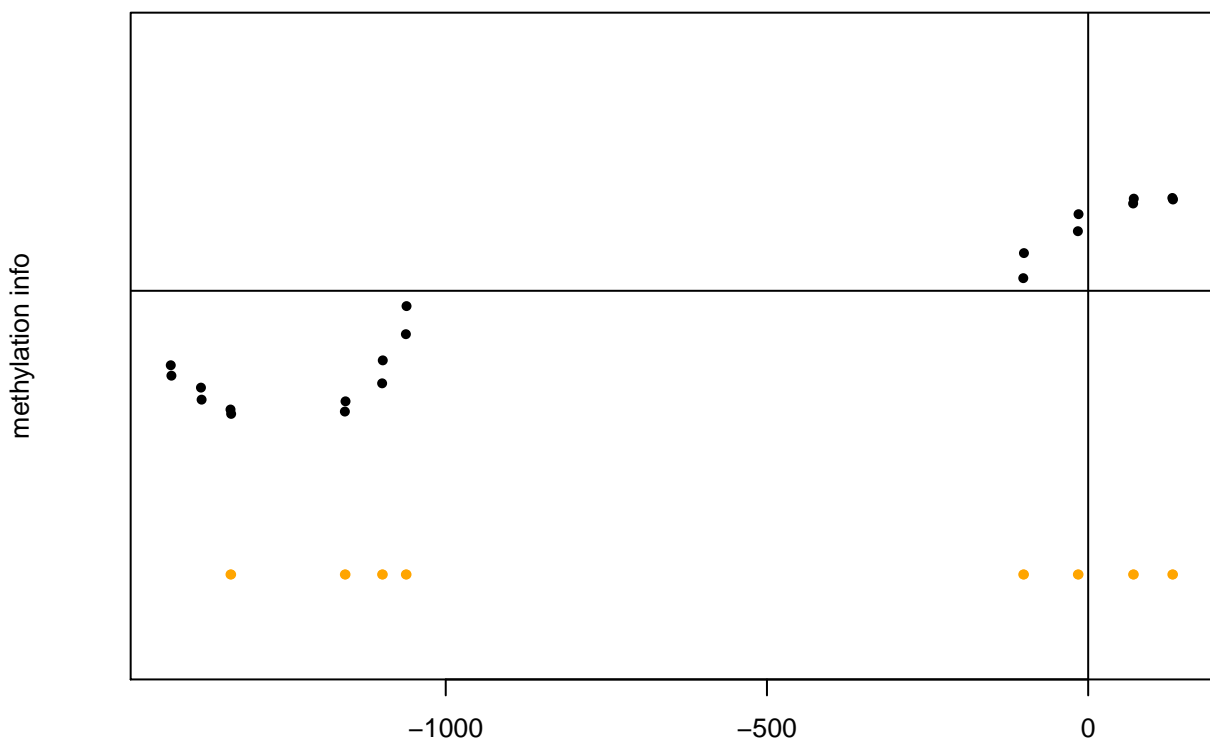

PLA1A raw %methylation, red=UC, blue=Normal

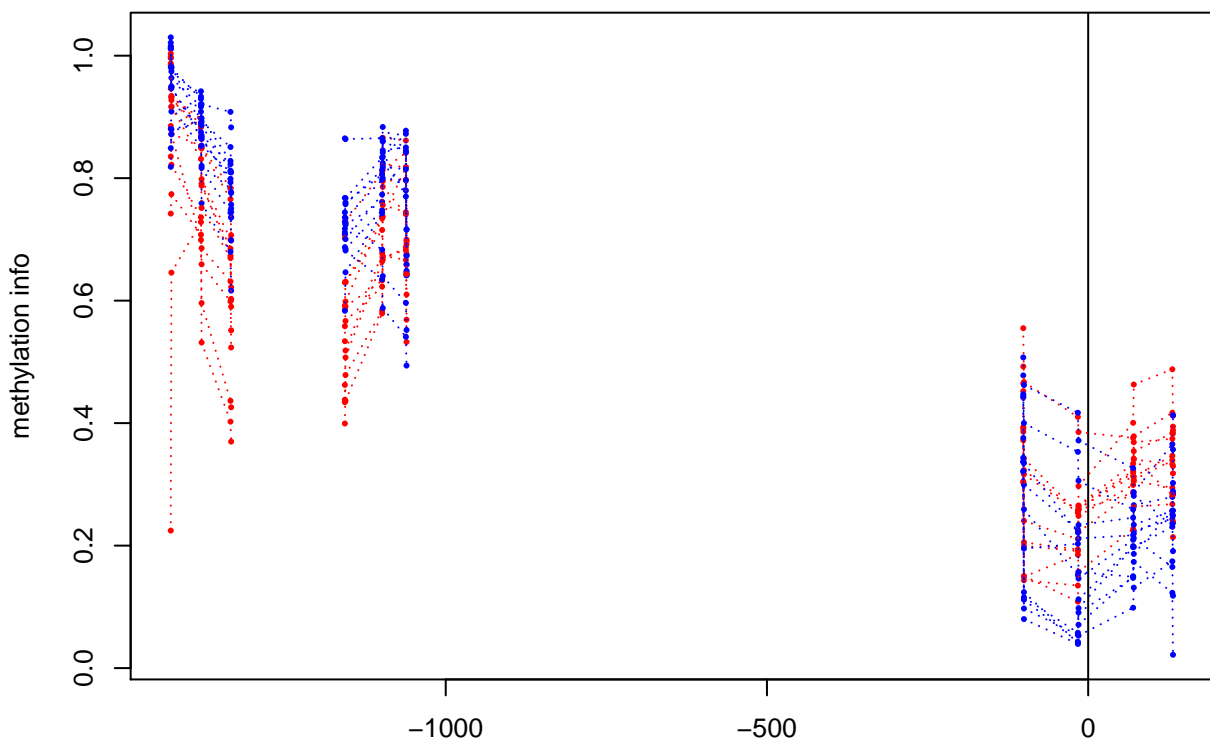

RNAseq logFC(UC-N)= 2.28

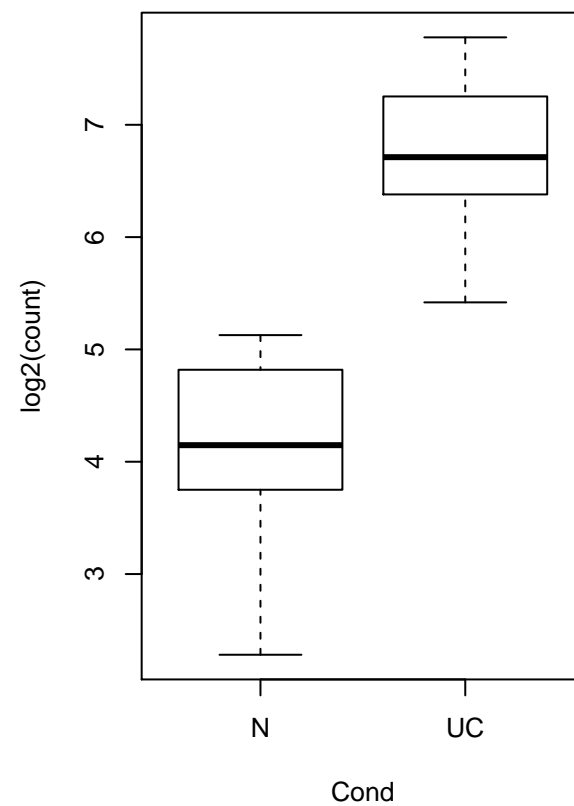



PLCE1 average UC-N %methylation max=11.77% min=-5.3%

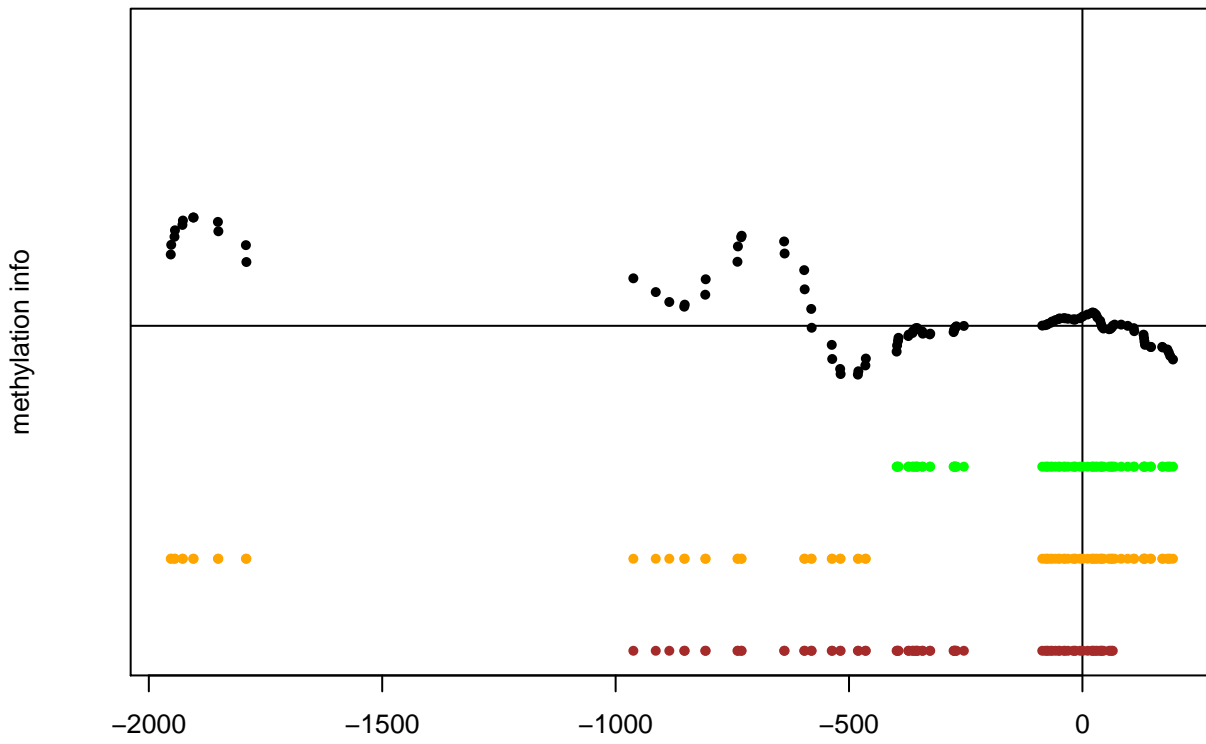

PLCE1 raw %methylation, red=UC, blue=Normal

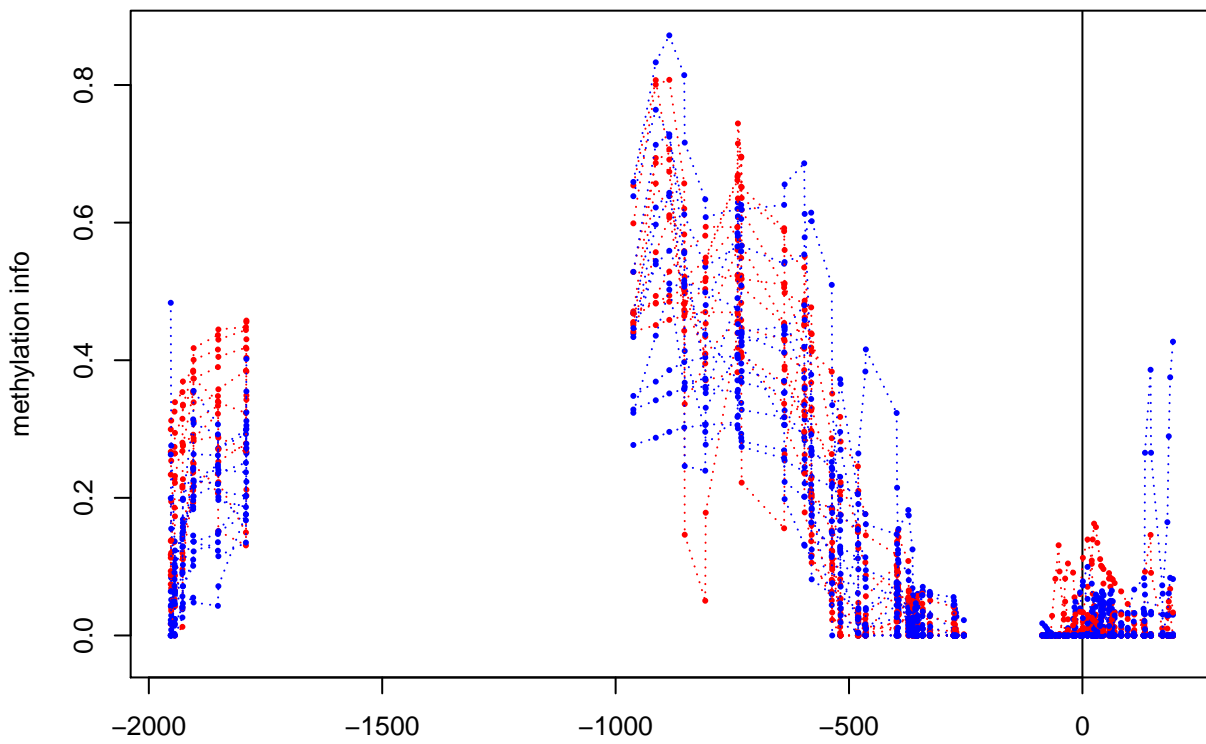

RNAseq logFC(UC-N)= -1.02

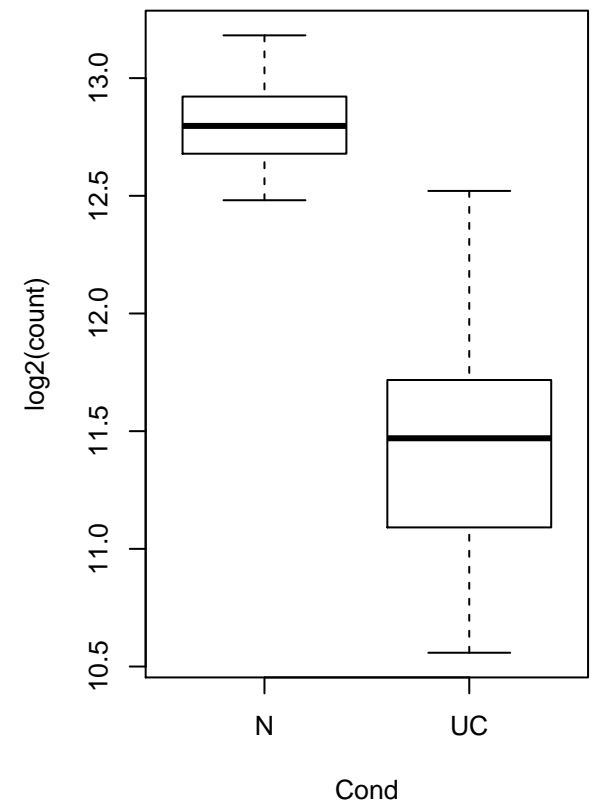

PLD4 average UC-N %methylation max=-9.65% min=-24.42%

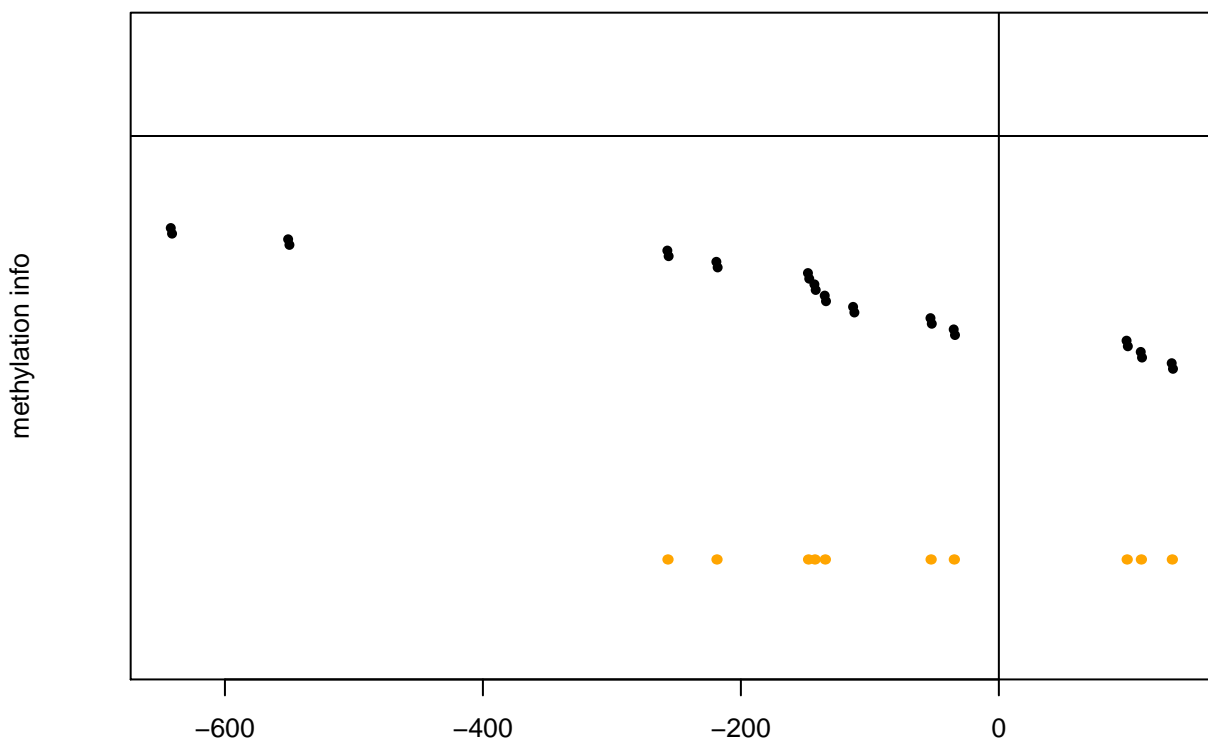

PLD4 raw %methylation, red=UC, blue=Normal

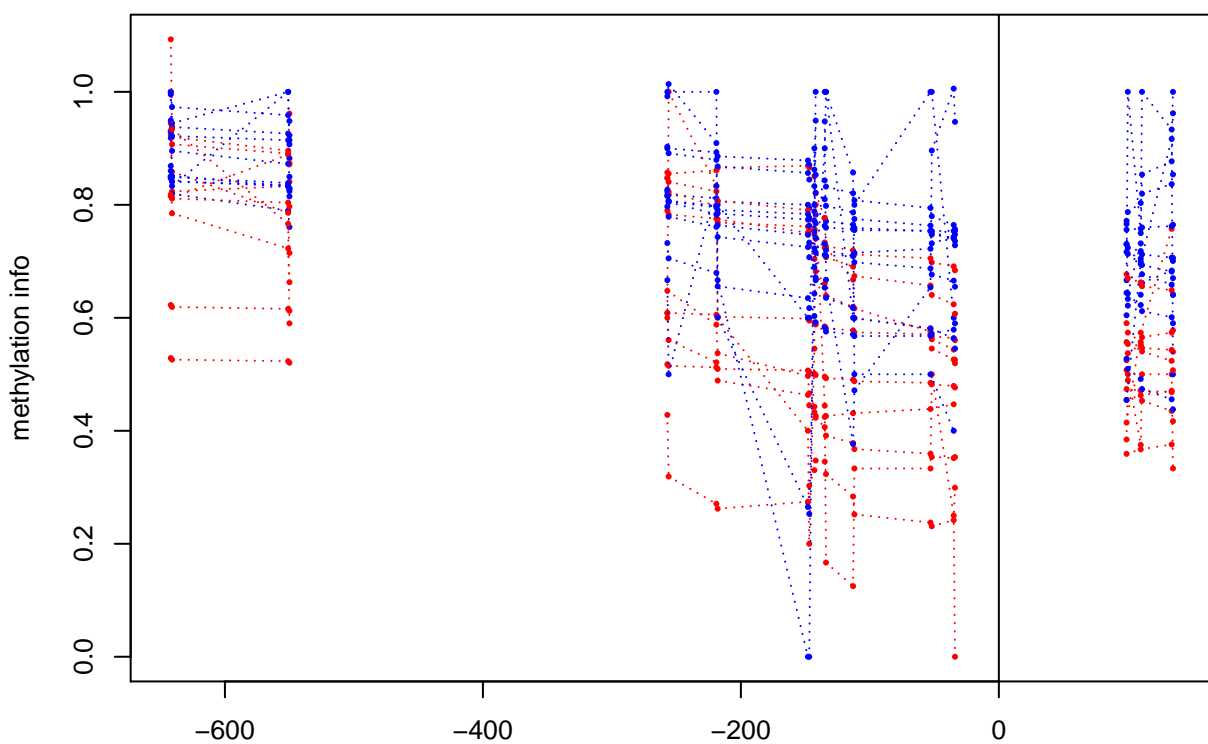

RNAseq logFC(UC-N)= 1.06

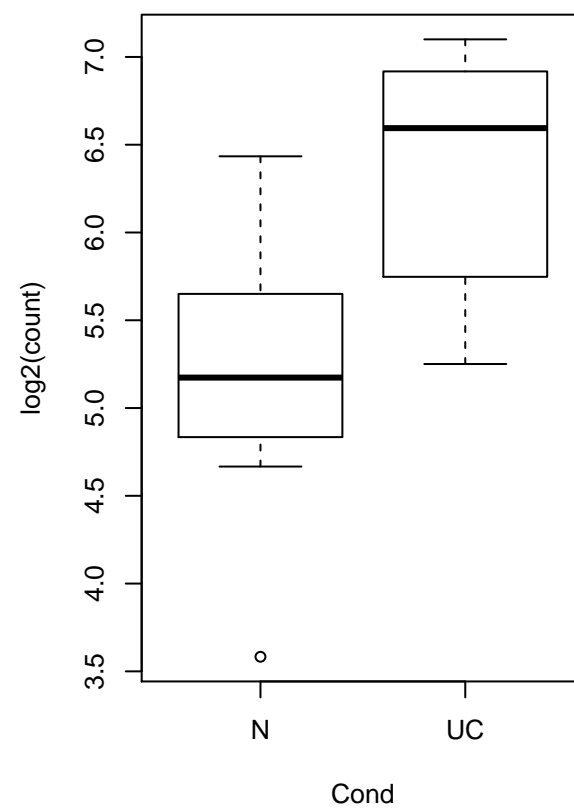

PLEKHG6 average UC-N %methylation max=18.92% min=-7.1%

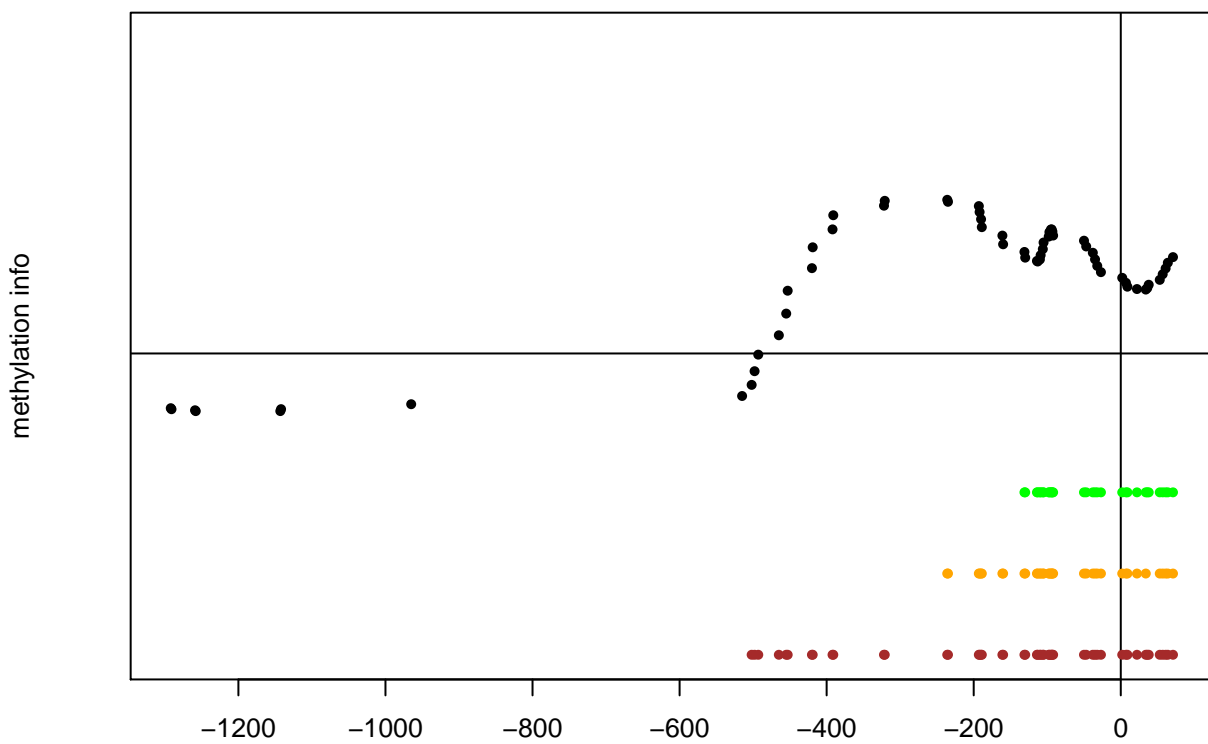

PLEKHG6 raw %methylation, red=UC, blue=Normal

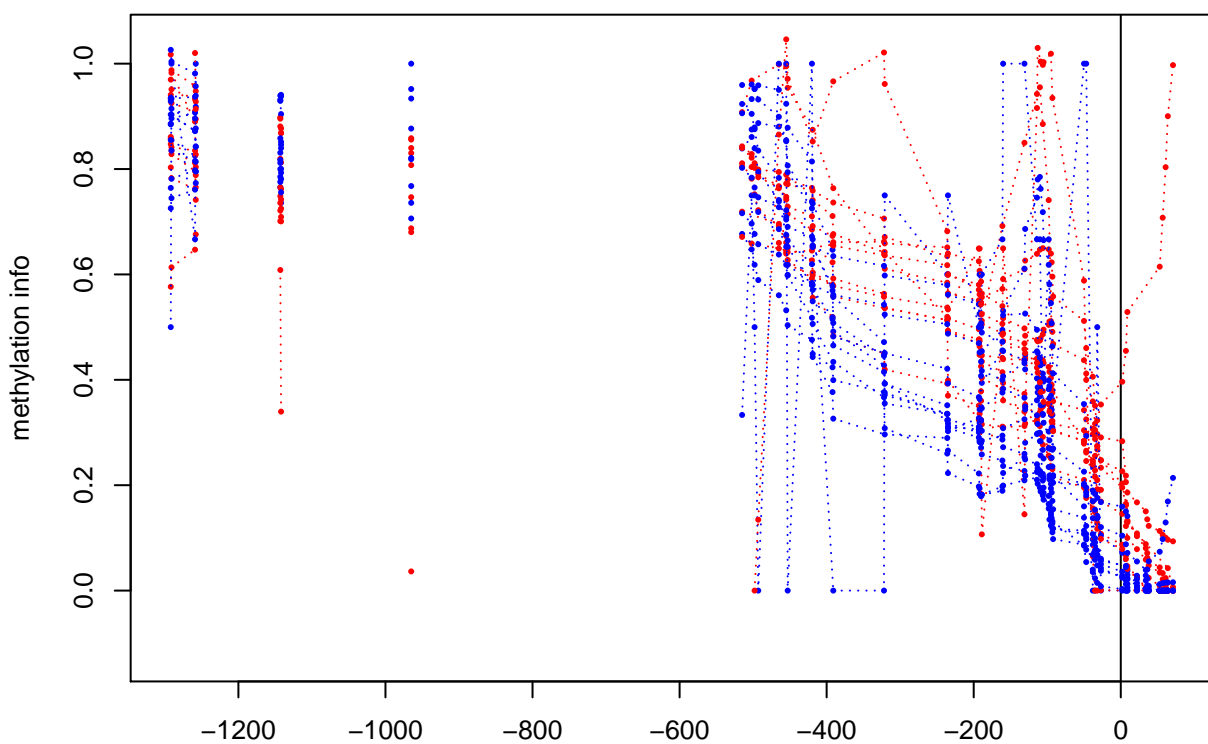

RNAseq logFC(UC-N)= -1.06

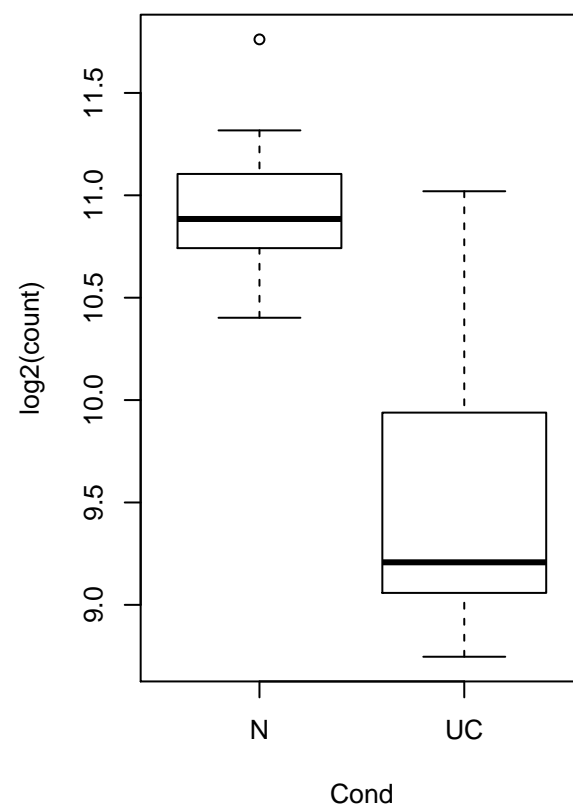

PLEK average UC-N %methylation max=2.69% min=-37.16%

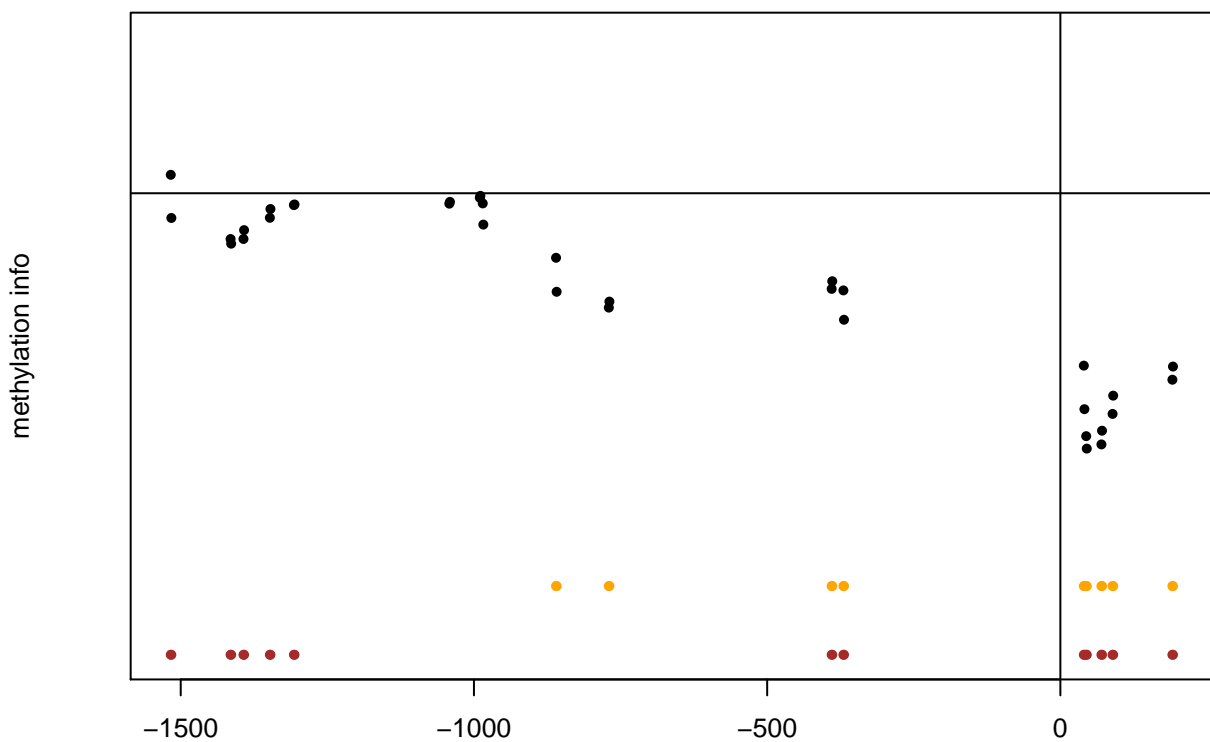

PLEK raw %methylation, red=UC, blue=Normal

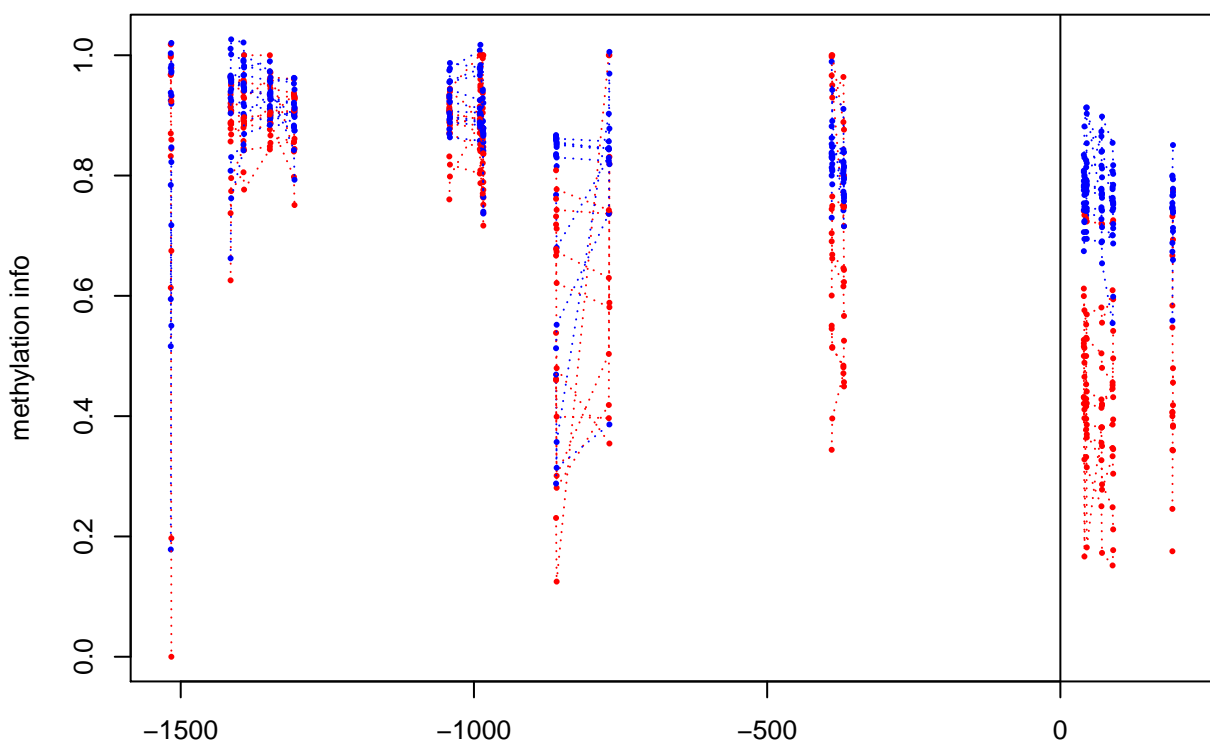

RNAseq logFC(UC-N)= 1.69

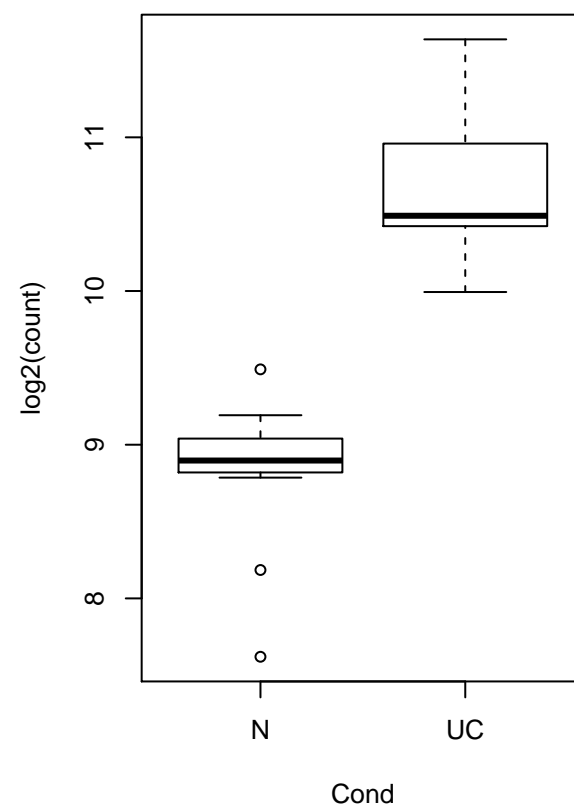

PNLIPRP2 average UC-N %methylation max=35.71% min=3.12%

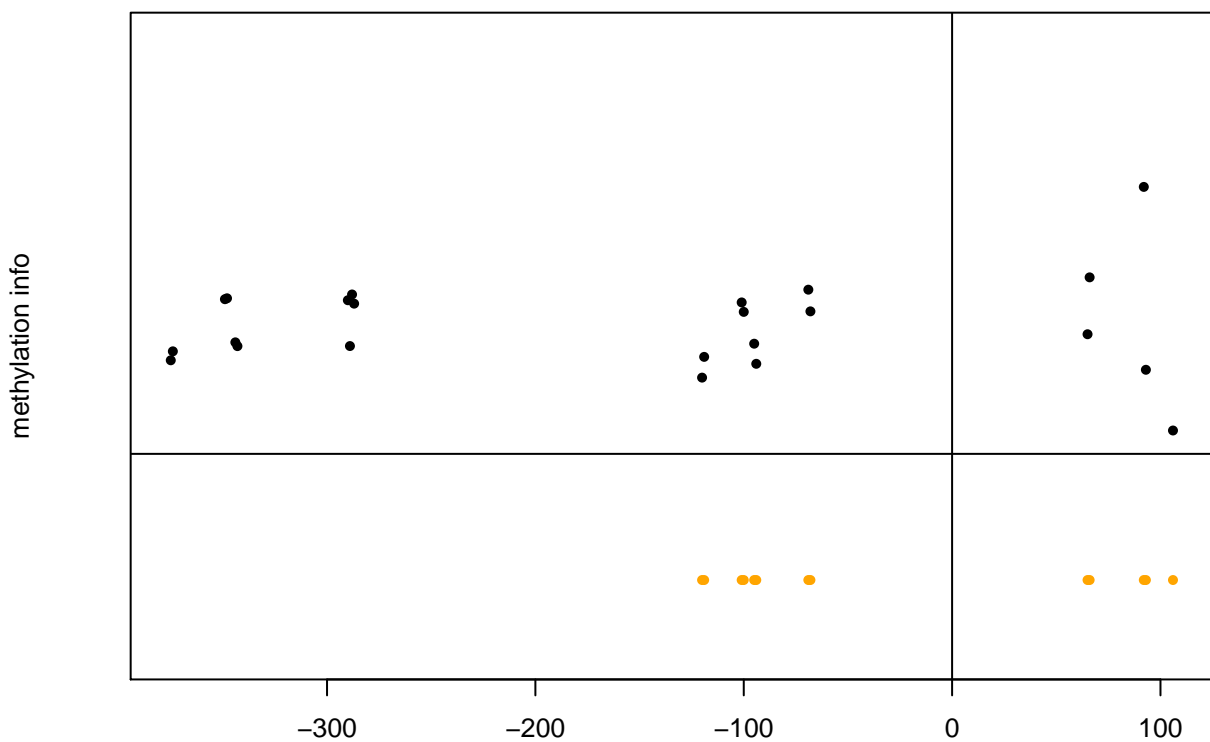

PNLIPRP2 raw %methylation, red=UC, blue=Normal

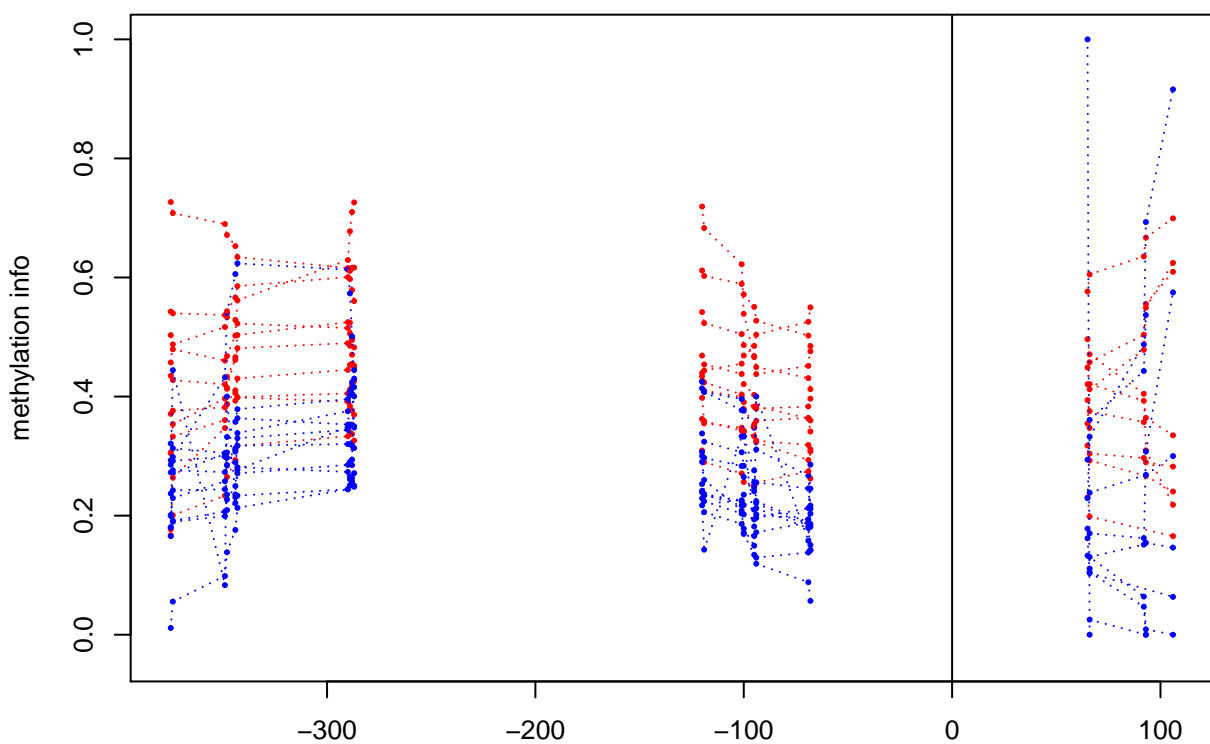

RNAseq logFC(UC-N) = -1.74

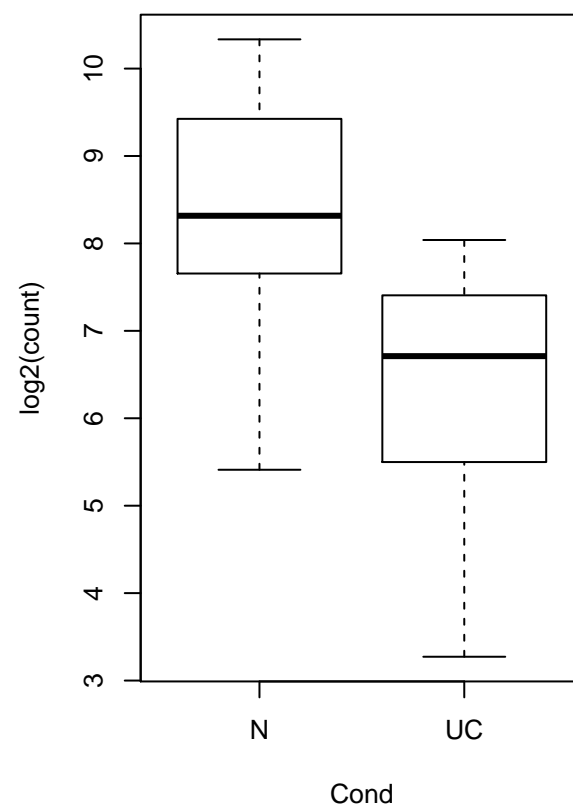

PPP1R16B average UC-N %methylation max=0.55% min=-27.24%

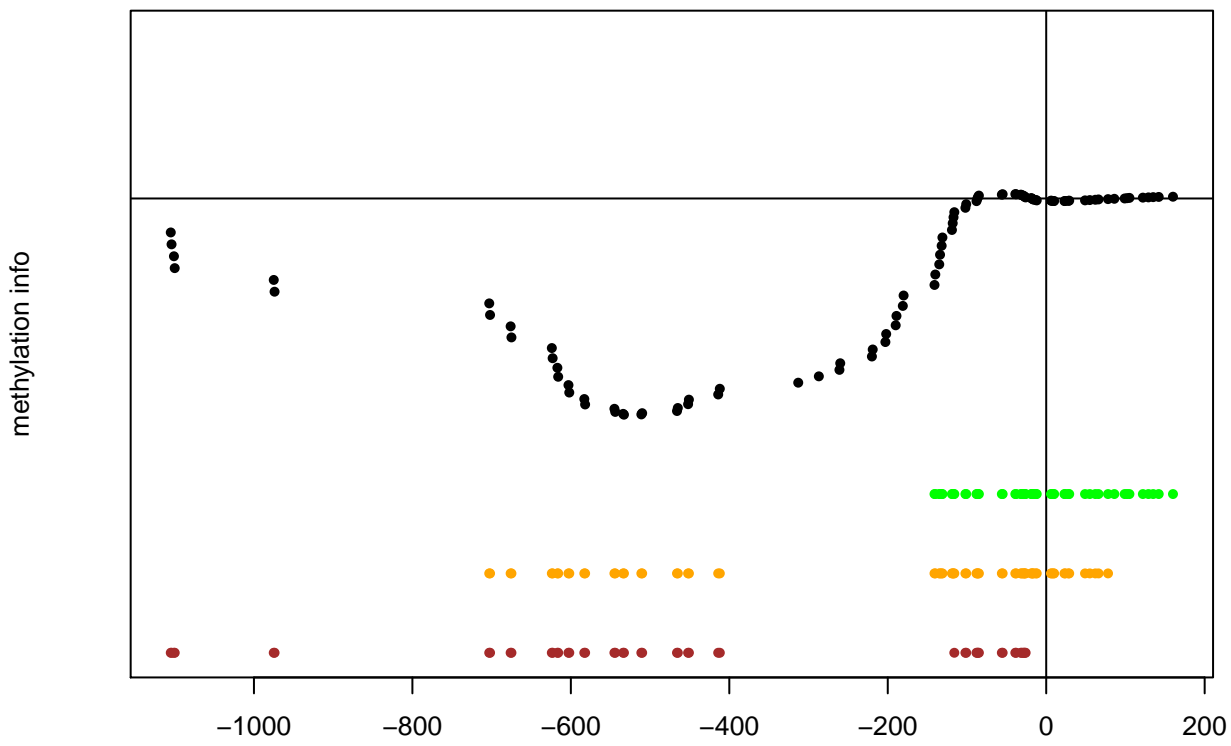

PPP1R16B raw %methylation, red=UC, blue=Normal

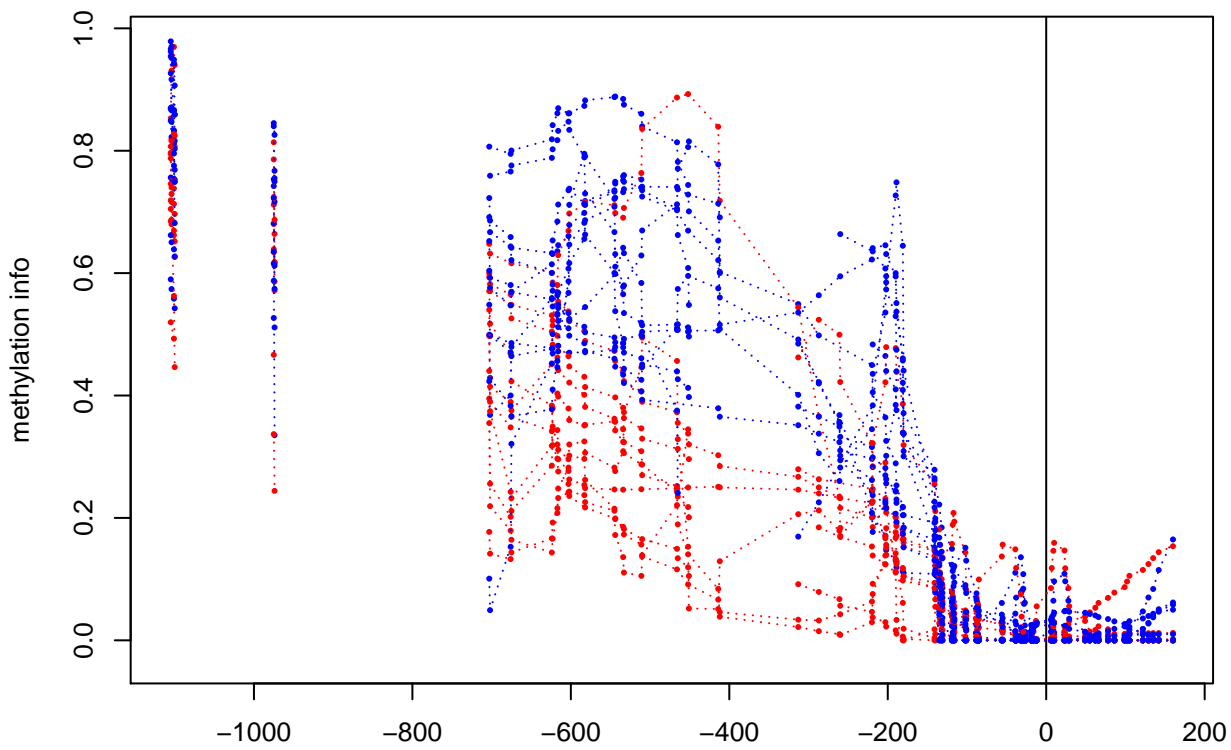

RNAseq logFC(UC-N)= 1.41

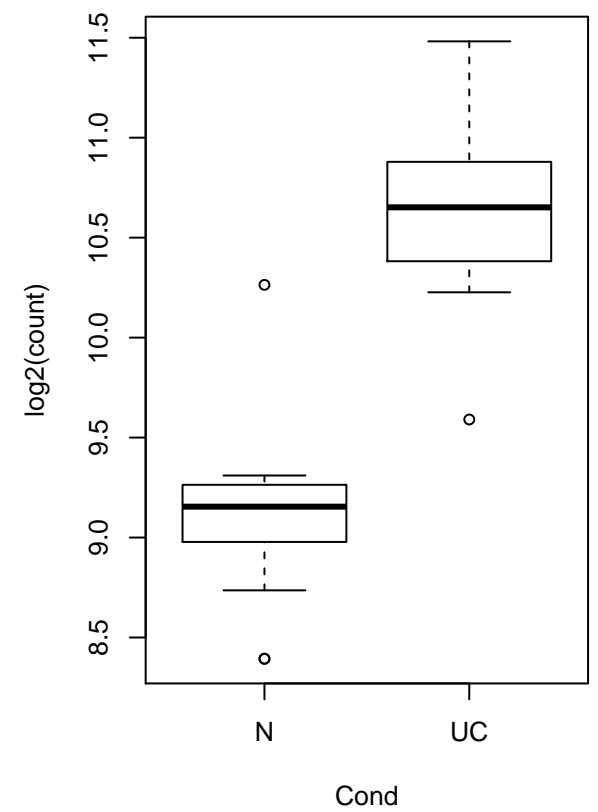

PRAP1 average UC-N %methylation max=27.33% min=-6.66%

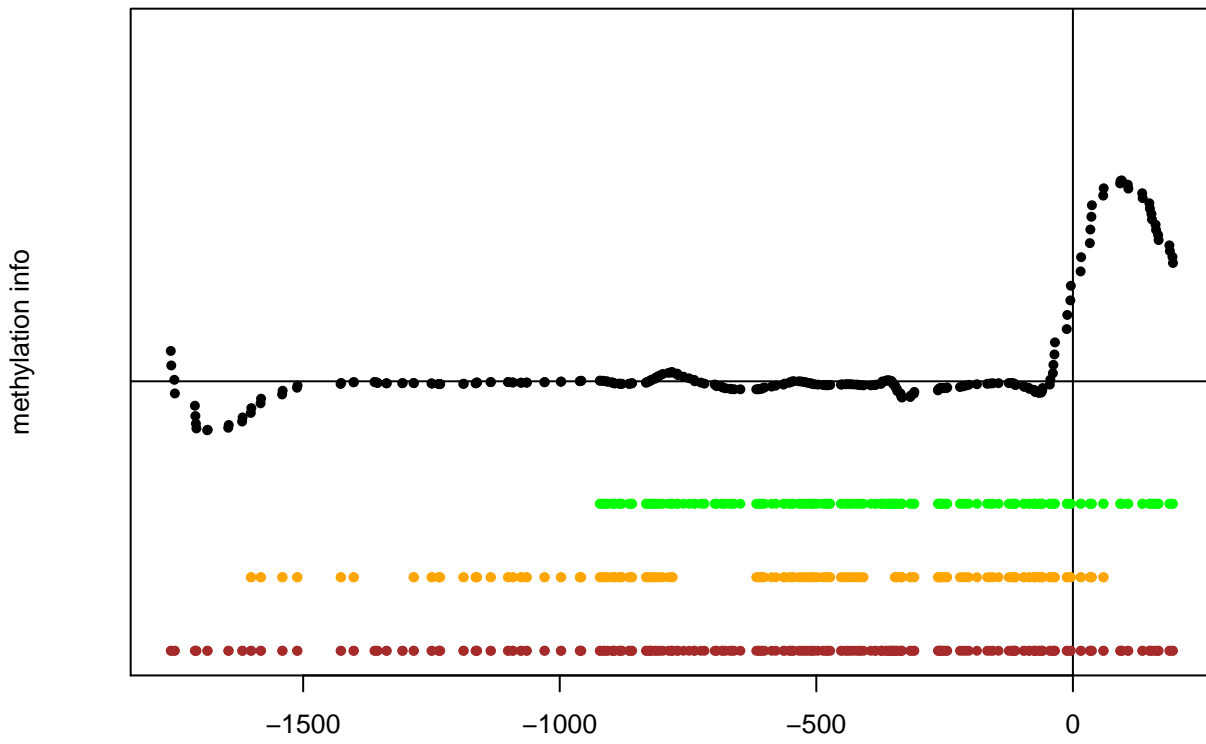

PRAP1 raw %methylation, red=UC, blue=Normal

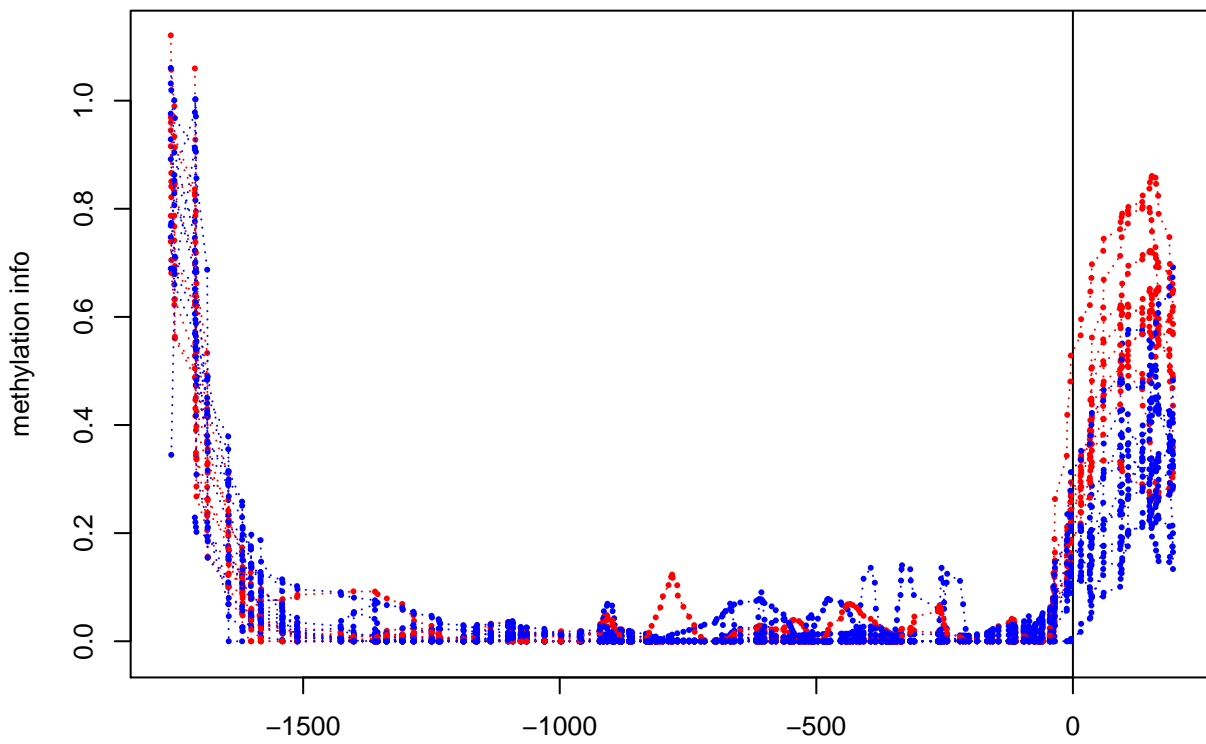

RNAseq logFC(UC-N) = -2.49

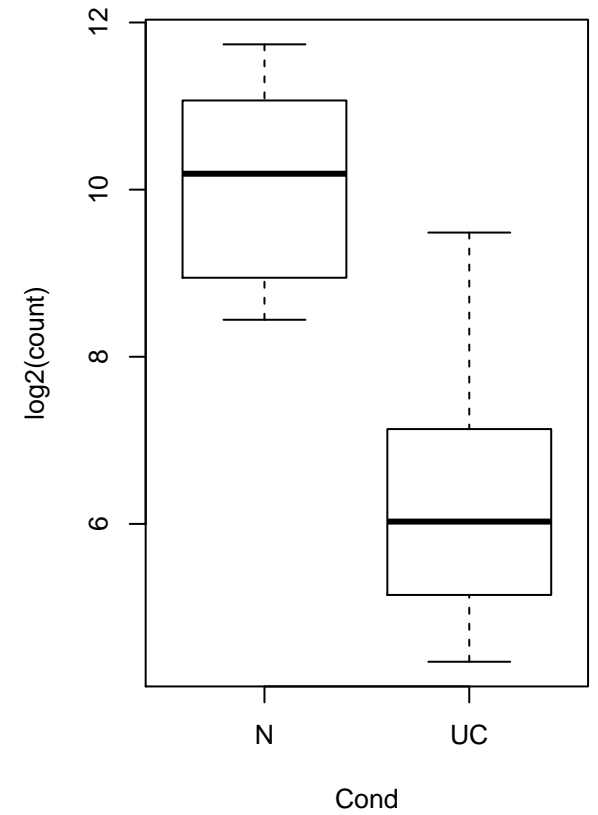

PRF1 average UC-N %methylation max=-7.77% min=-27.39%

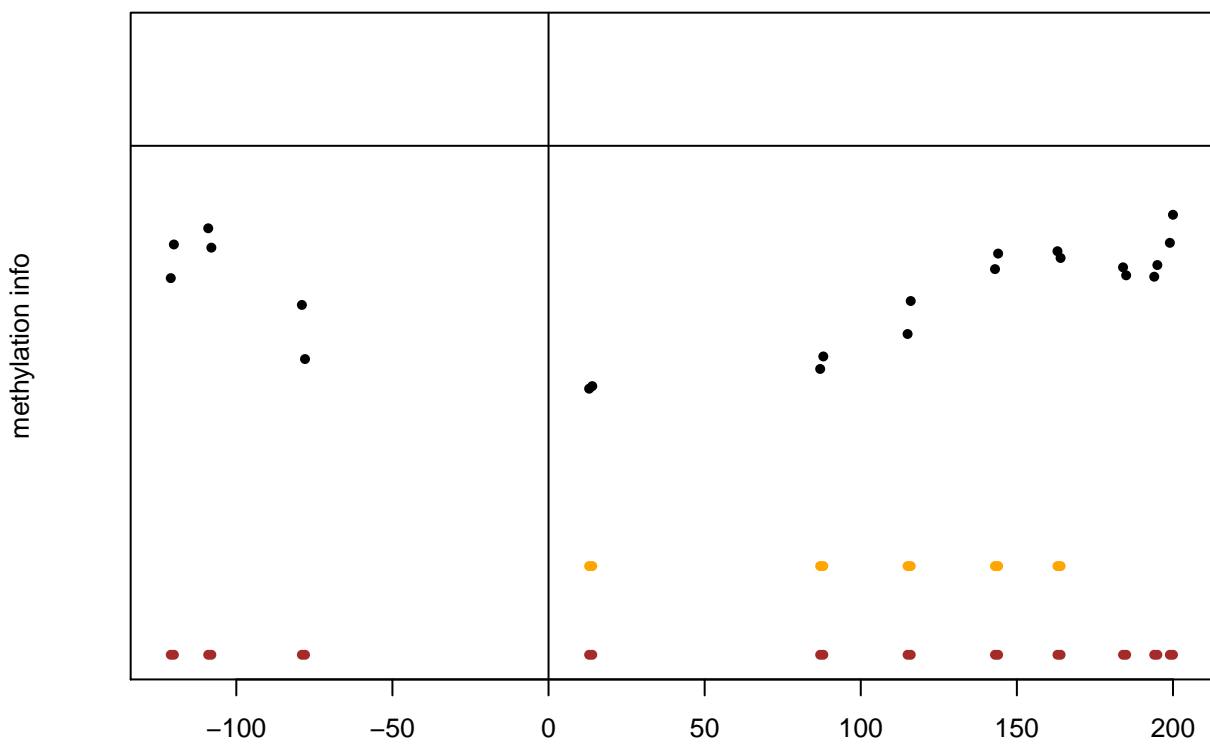

PRF1 raw %methylation, red=UC, blue=Normal

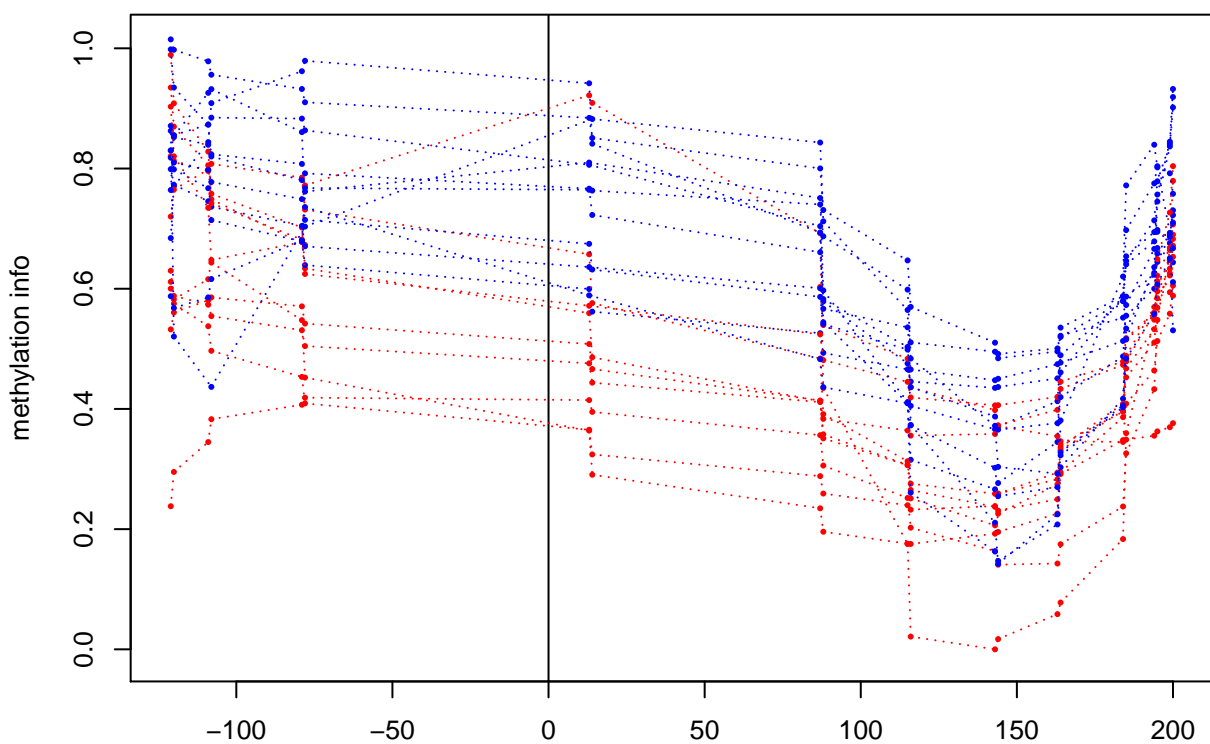

RNAseq logFC(UC-N)= 1.68

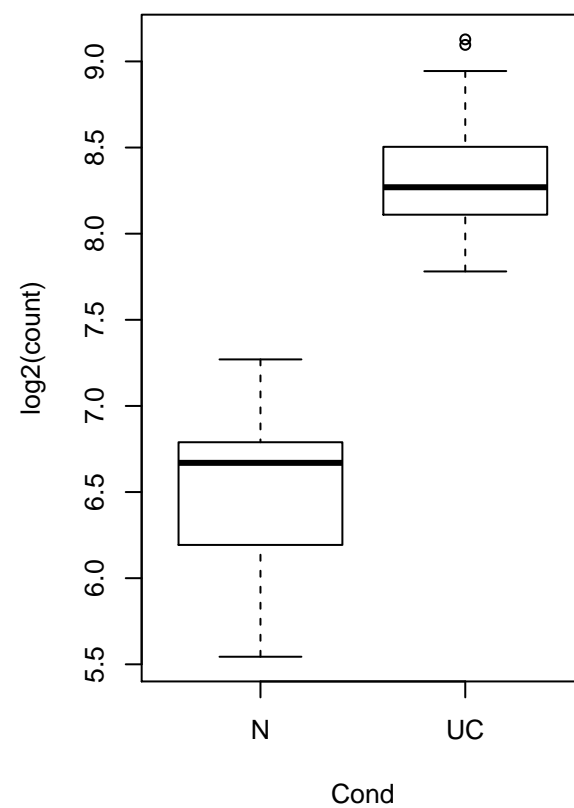



PRLR average UC-N %methylation max=11.99% min=-1.54%

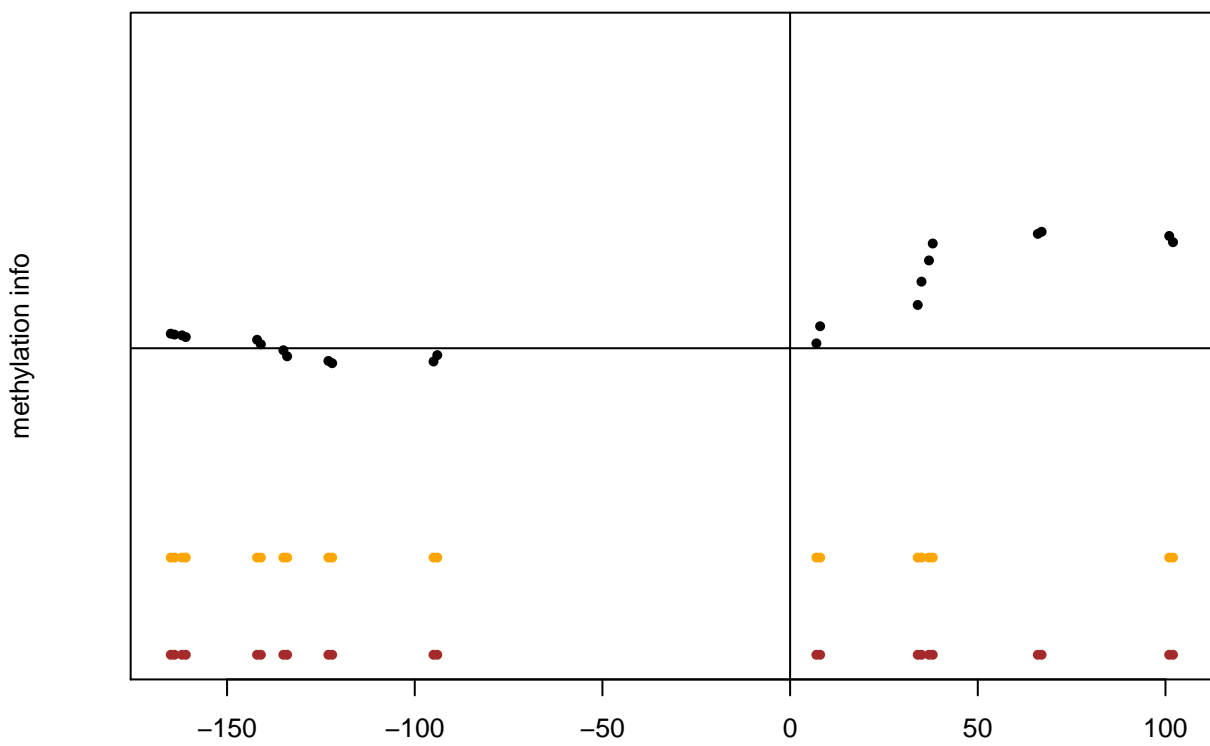

PRLR raw %methylation, red=UC, blue=Normal

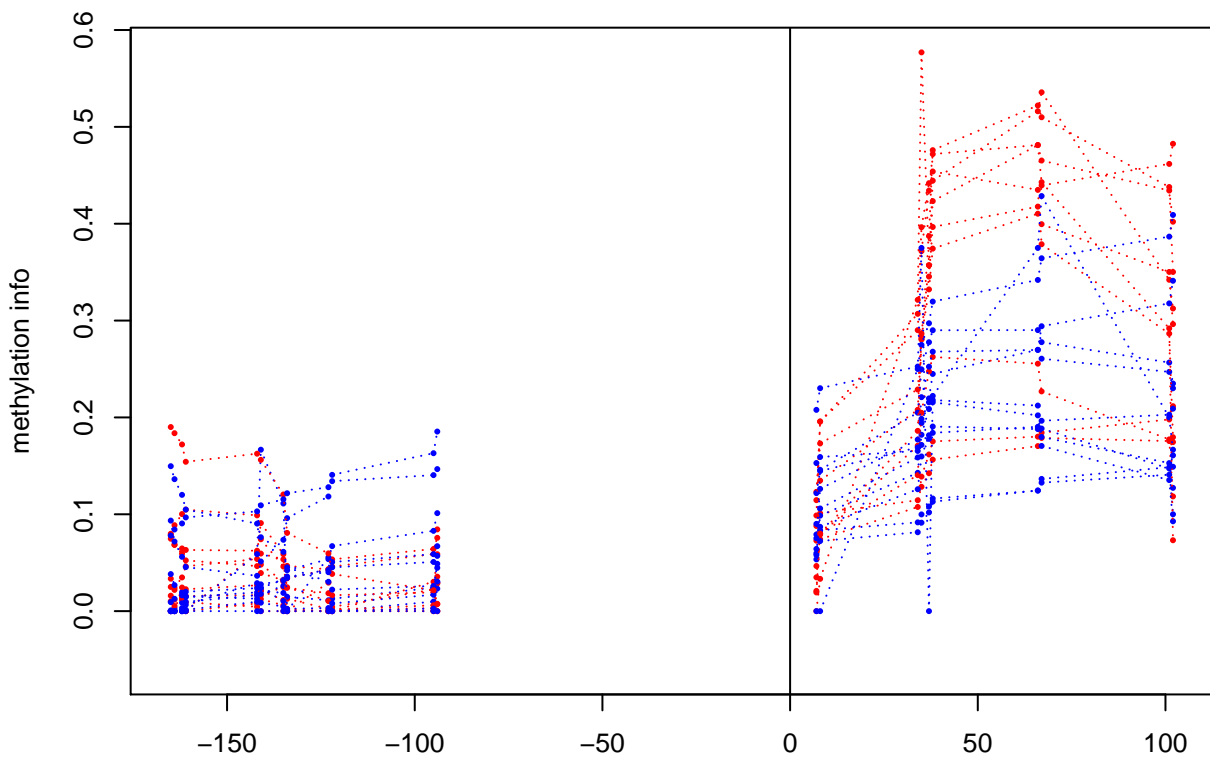

RNAseq logFC(UC-N)= -1.06

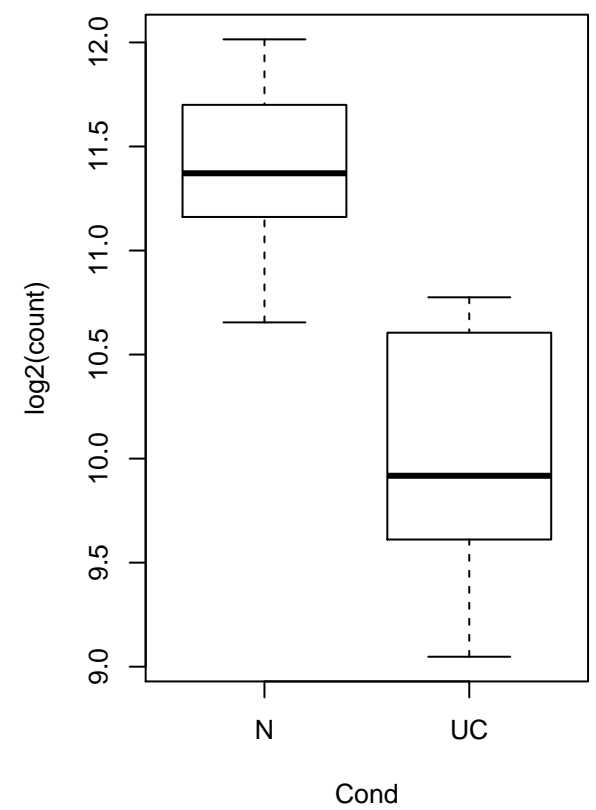

PSME2 average UC-N %methylation max=-0.03% min=-15.61%

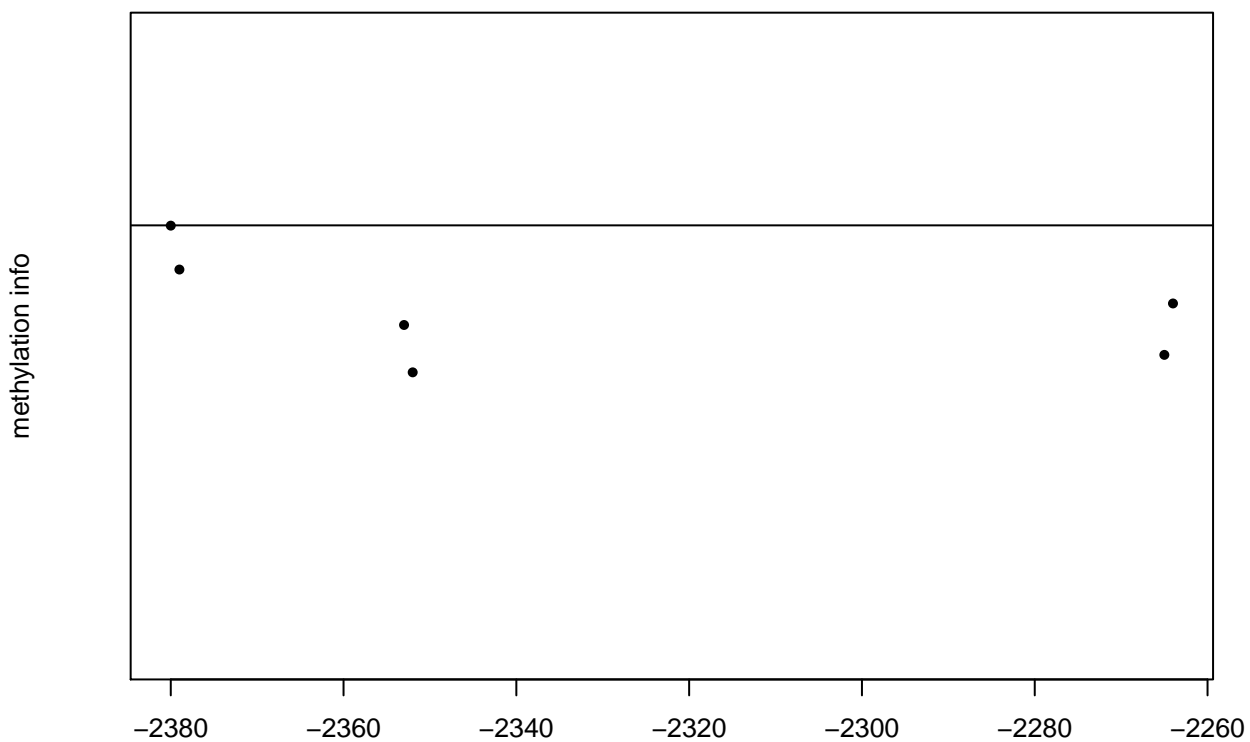

PSME2 raw %methylation, red=UC, blue=Normal

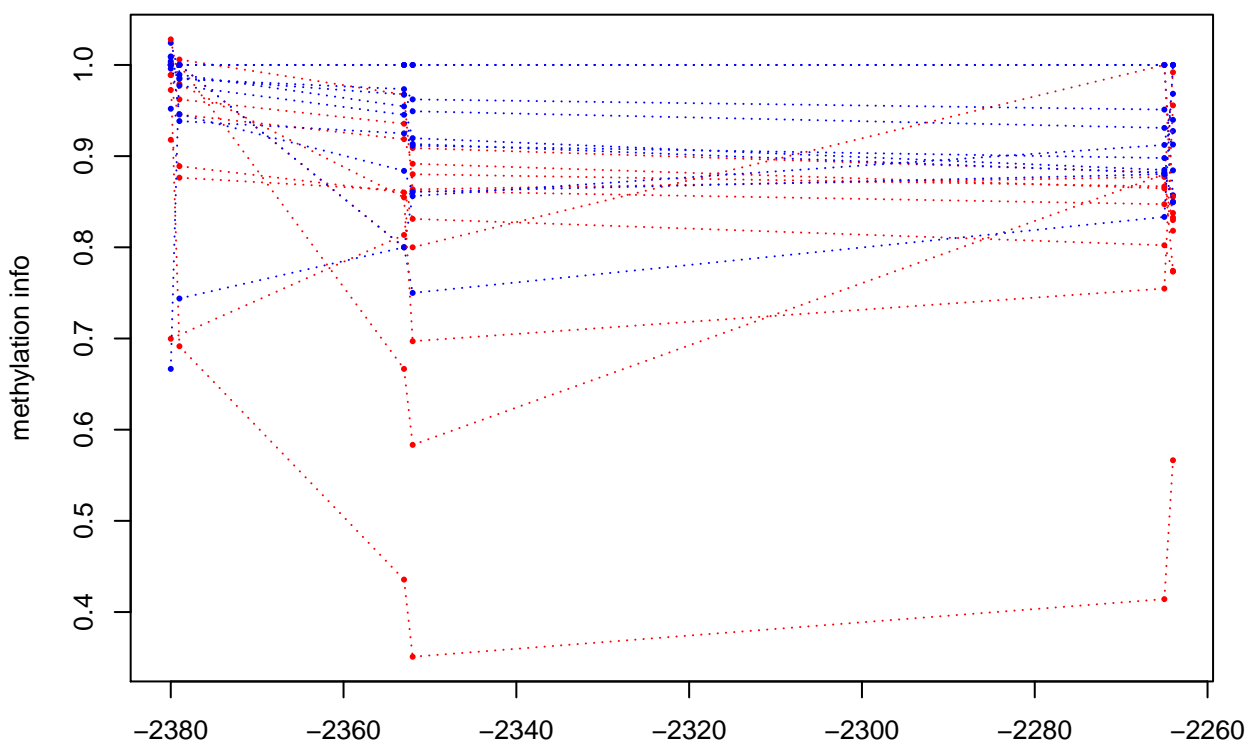

RNAseq logFC(UC-N)= 1.17

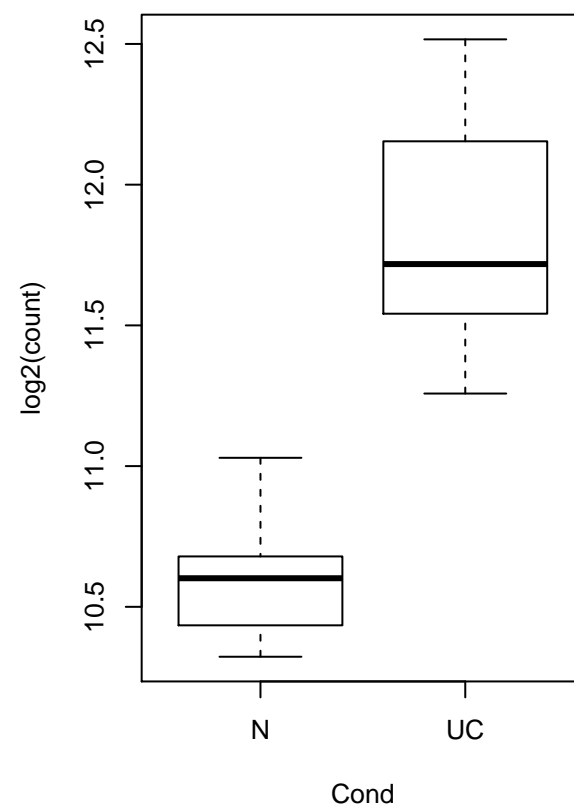

PSTPIP1 average UC-N %methylation max=-2.94% min=-41.71%

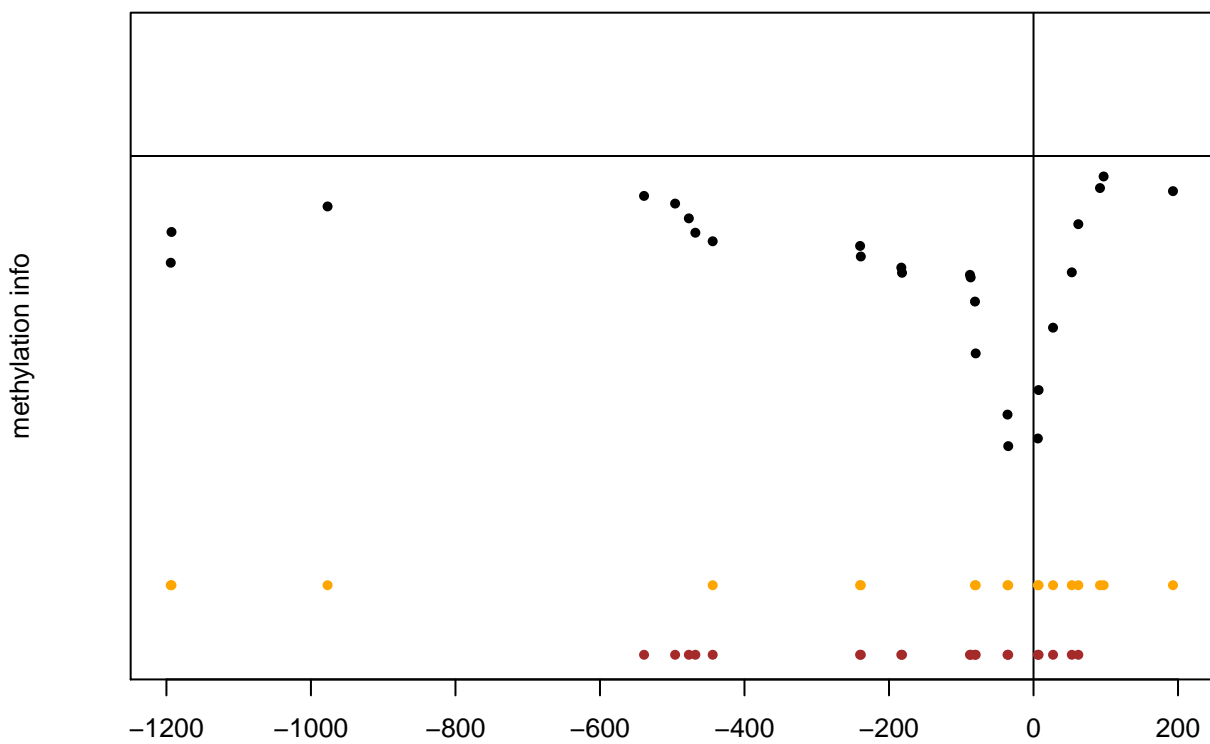

PSTPIP1 raw %methylation, red=UC, blue=Normal

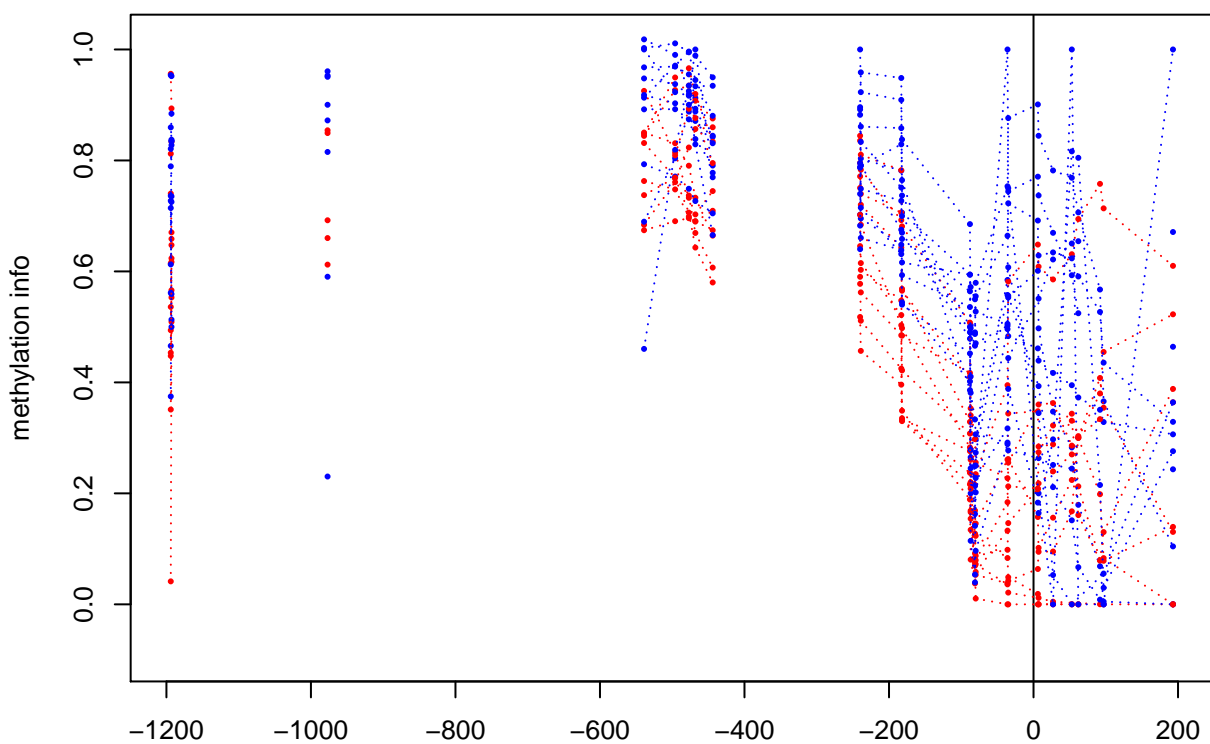

RNAseq logFC(UC-N)= 1.15

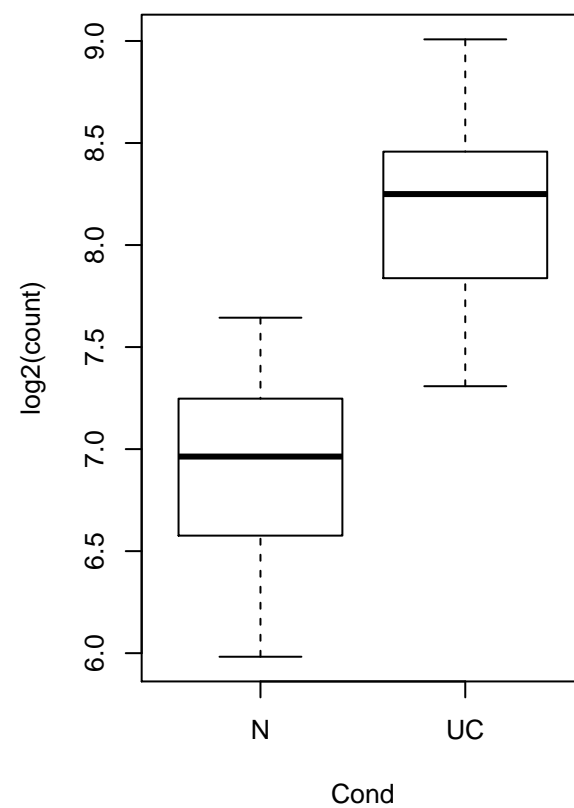

PTPN7 average UC-N %methylation max=-23.31% min=-44.24%

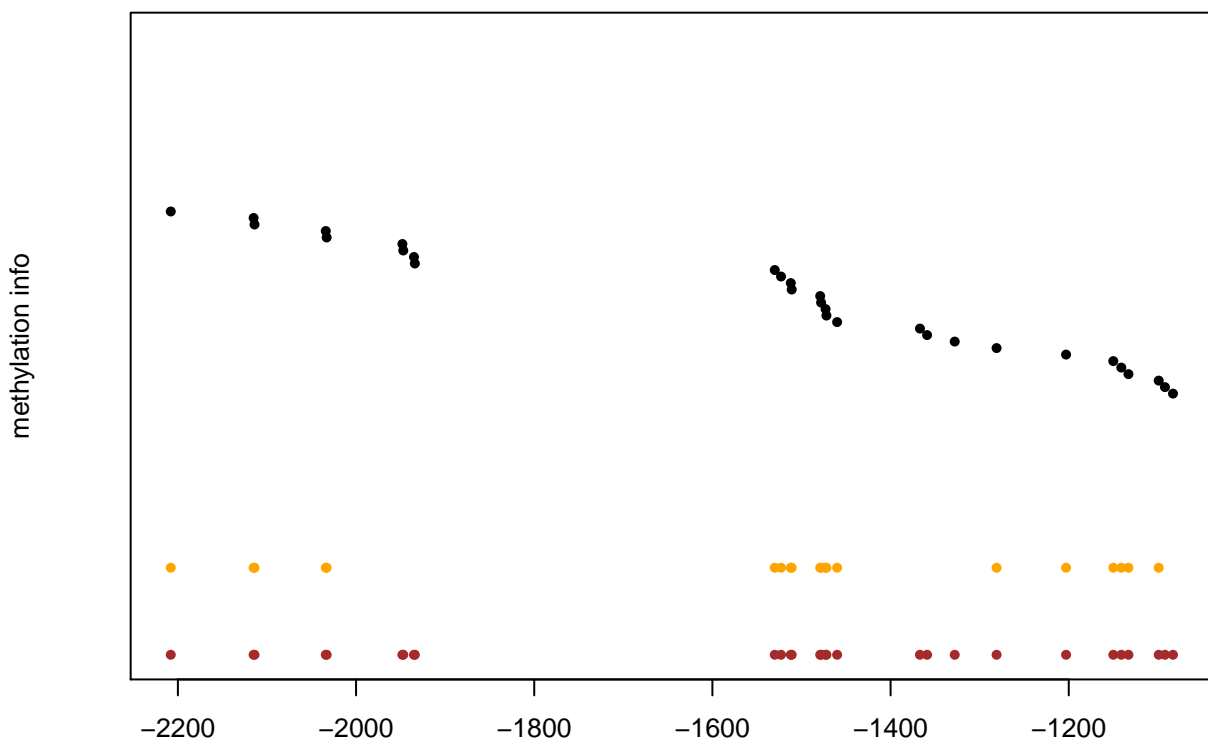

PTPN7 raw %methylation, red=UC, blue=Normal

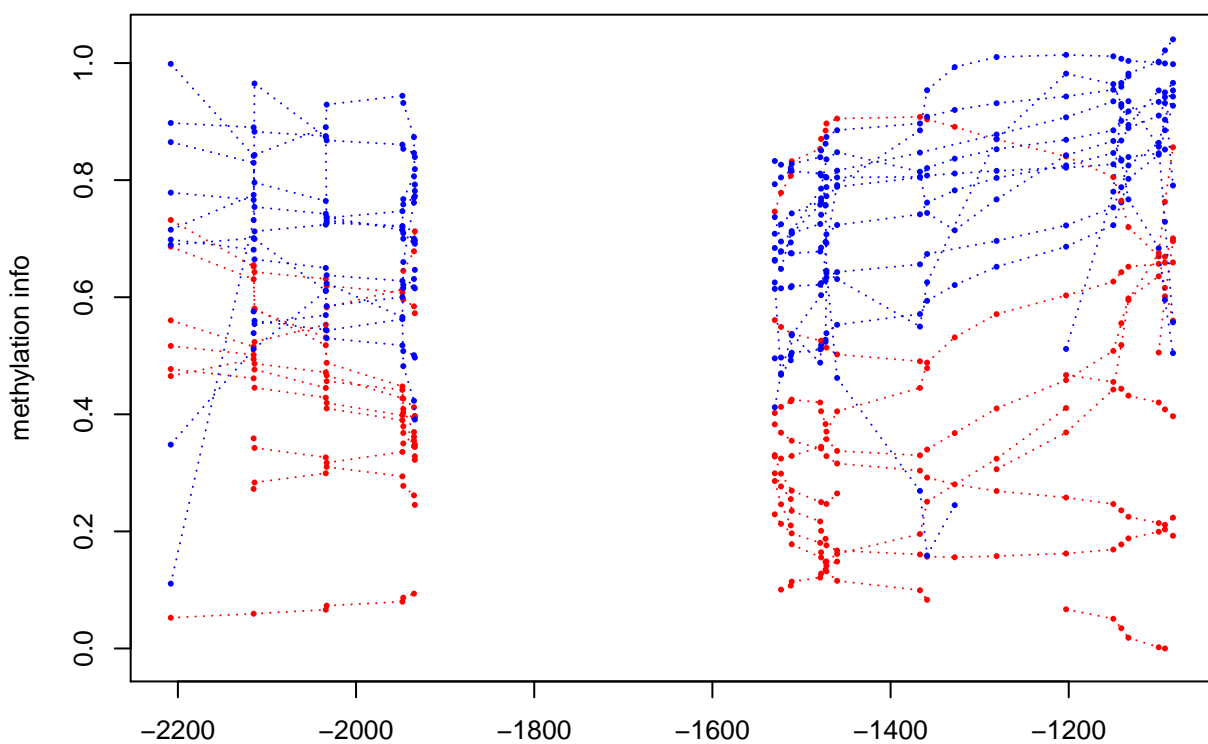

RNAseq logFC(UC-N)= 1.62

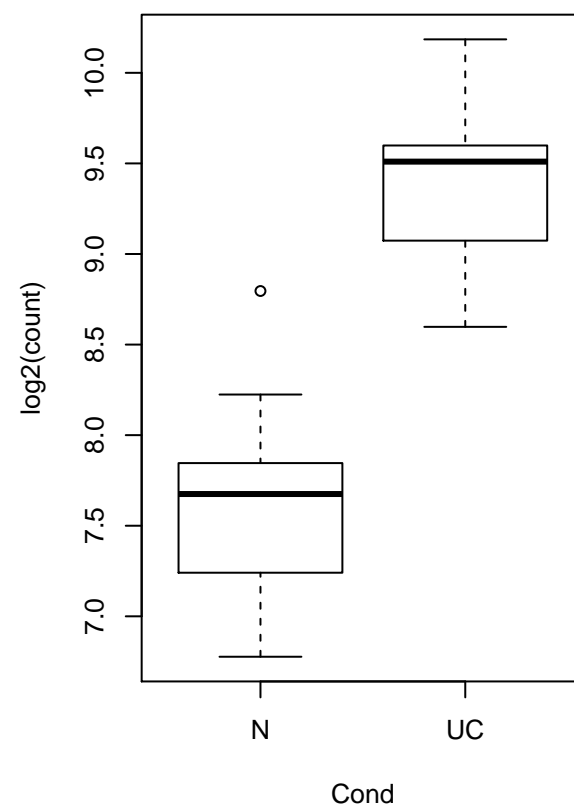

PYHIN1 average UC-N %methylation max=7.29% min=-13.32%

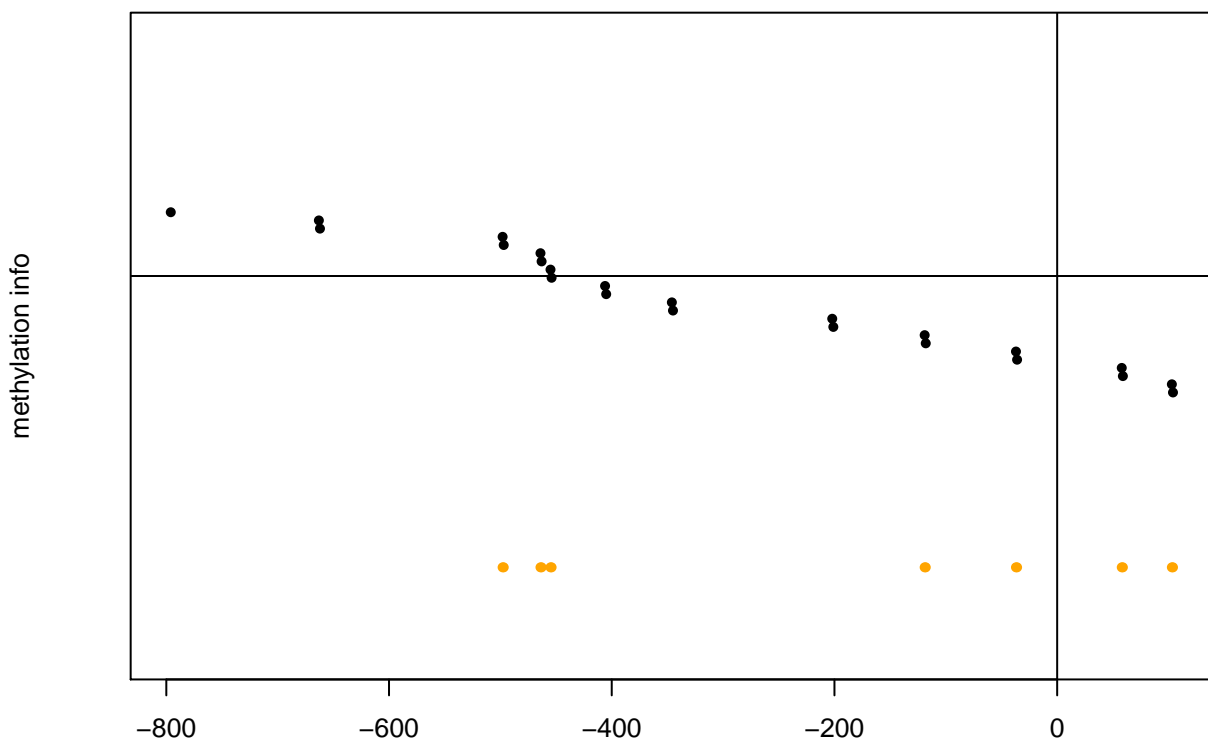

PYHIN1 raw %methylation, red=UC, blue=Normal

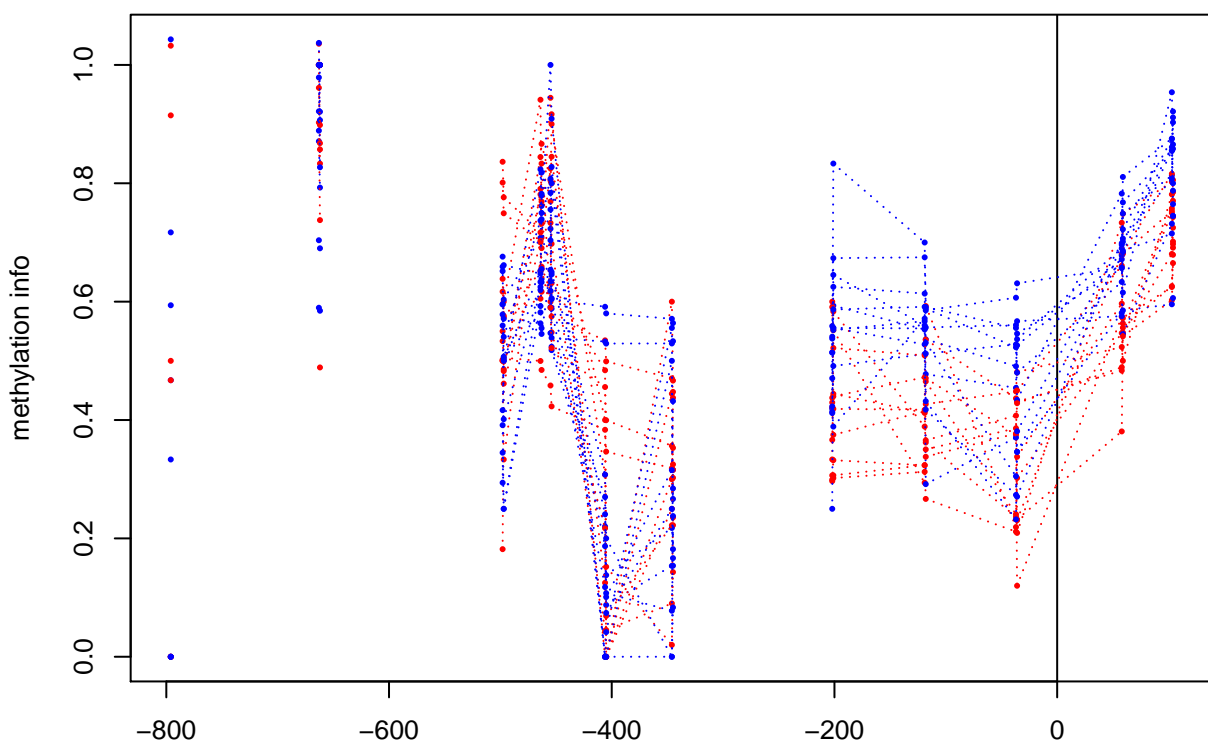

RNAseq logFC(UC-N)= 1.24

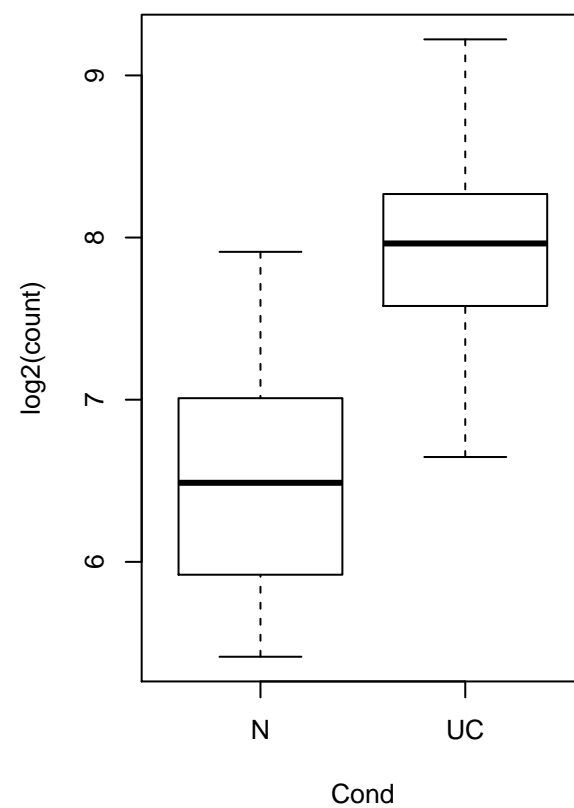

RAB17 average UC-N %methylation max=21.9% min=10.8%

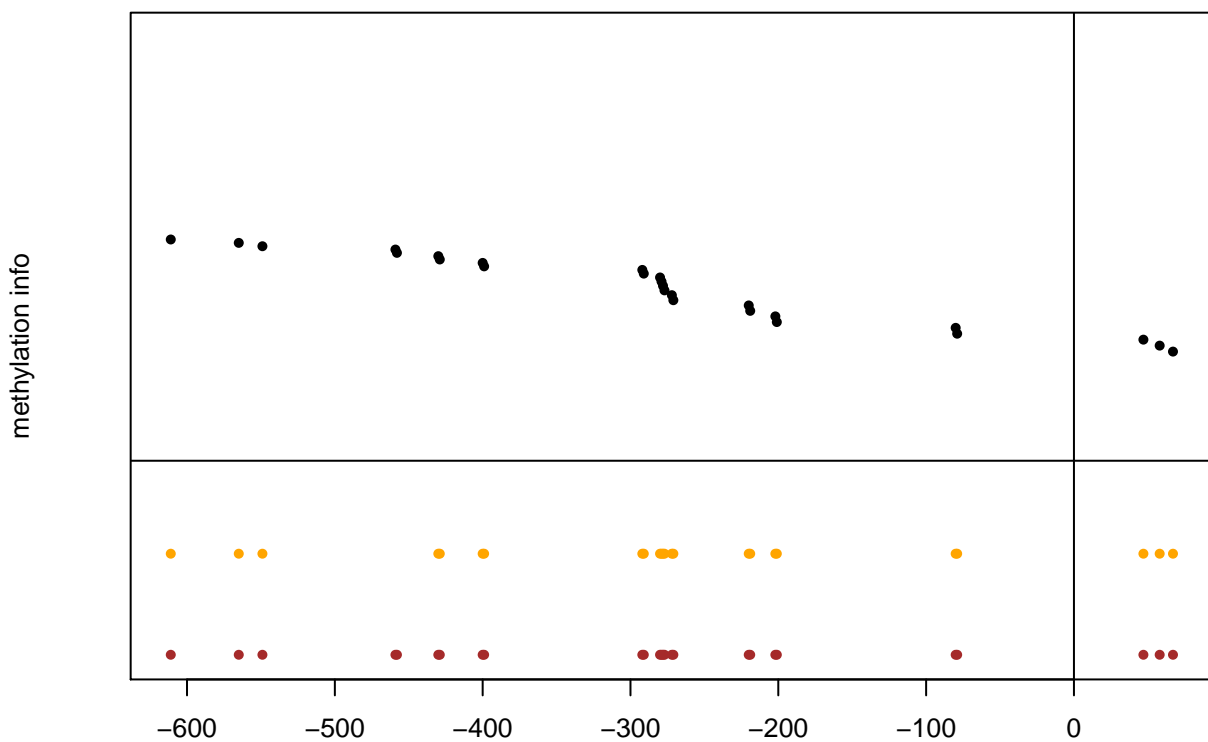

RAB17 raw %methylation, red=UC, blue=Normal

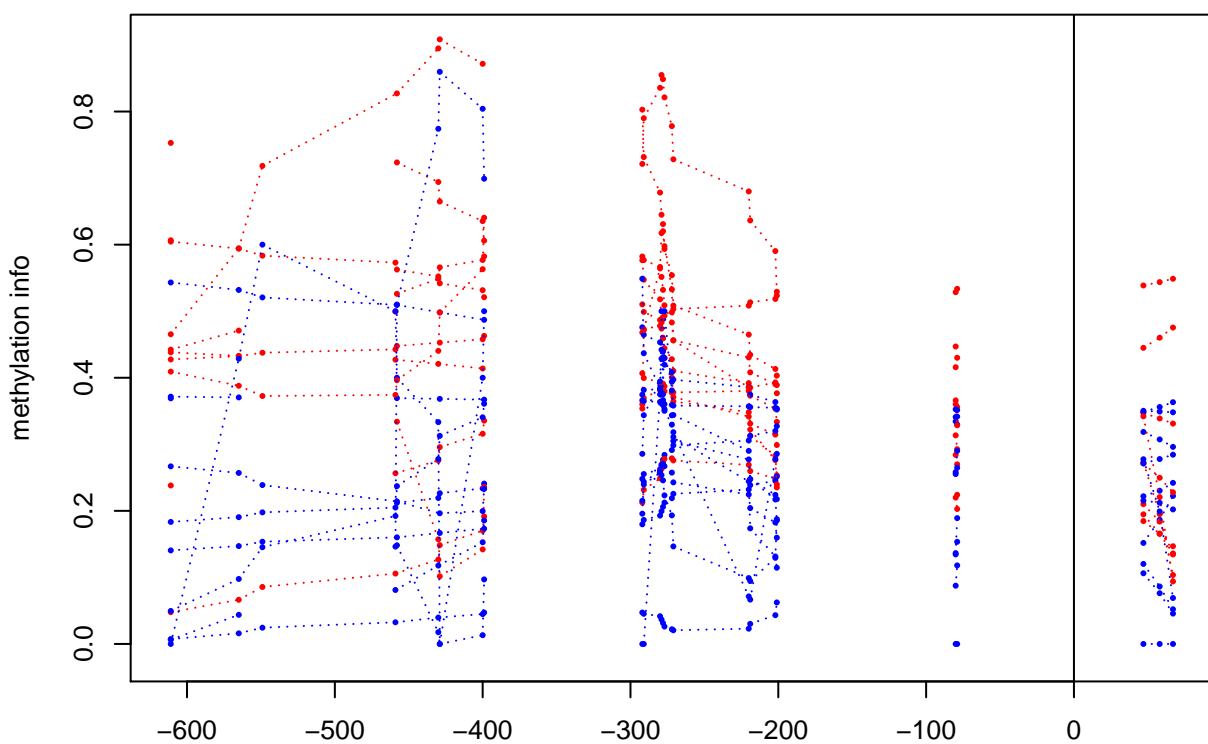

RNAseq logFC(UC-N)= -1.05

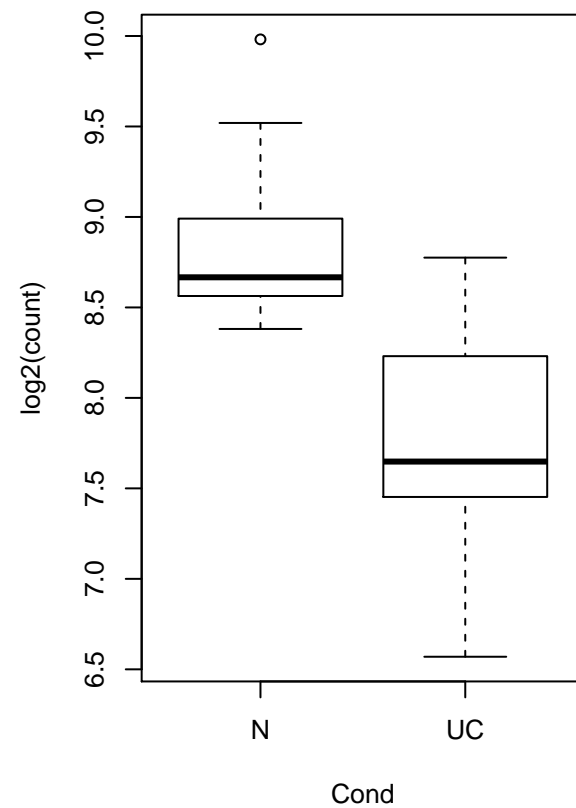

REC8 average UC-N %methylation max=-24.46% min=-49.23%

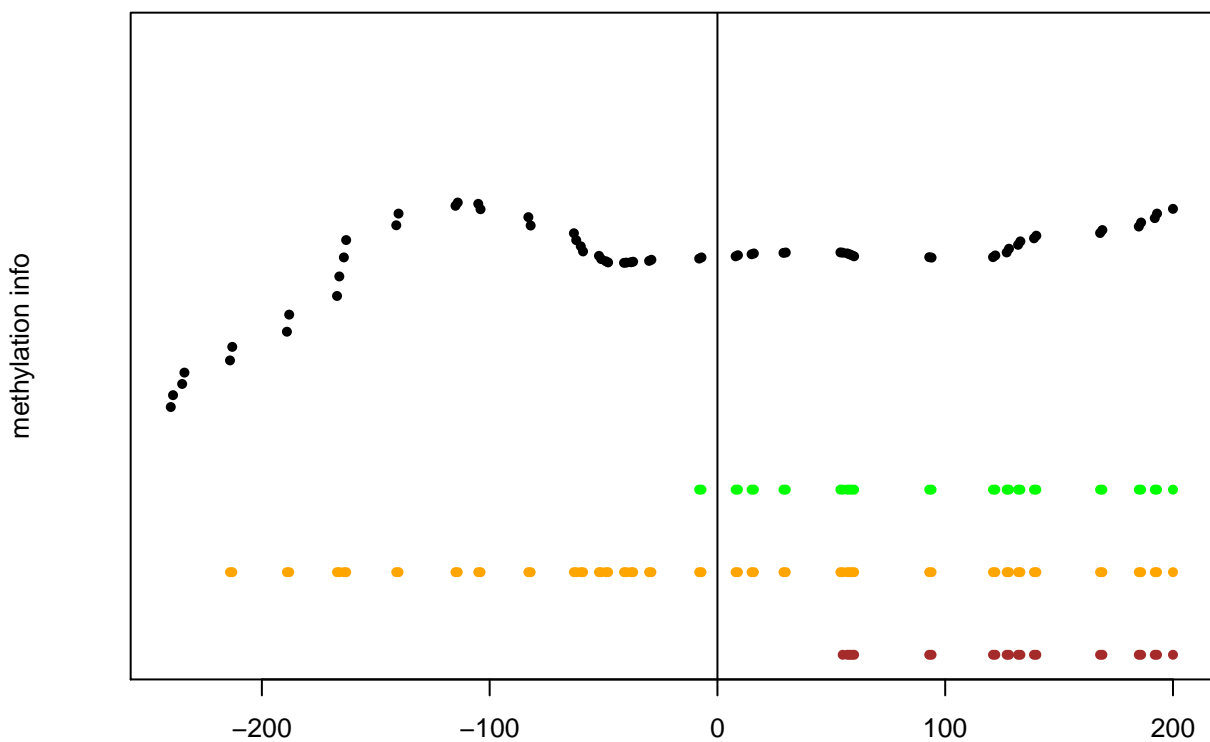

REC8 raw %methylation, red=UC, blue=Normal

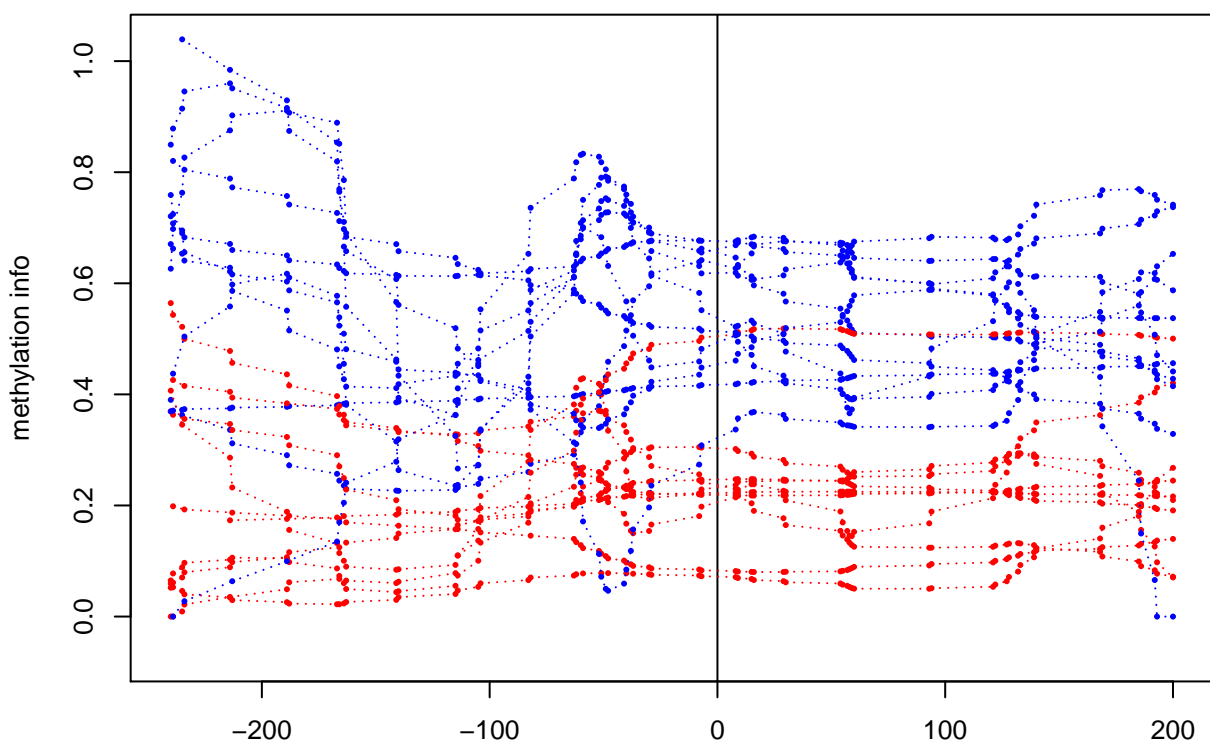

RNAseq logFC(UC-N)= 1.33

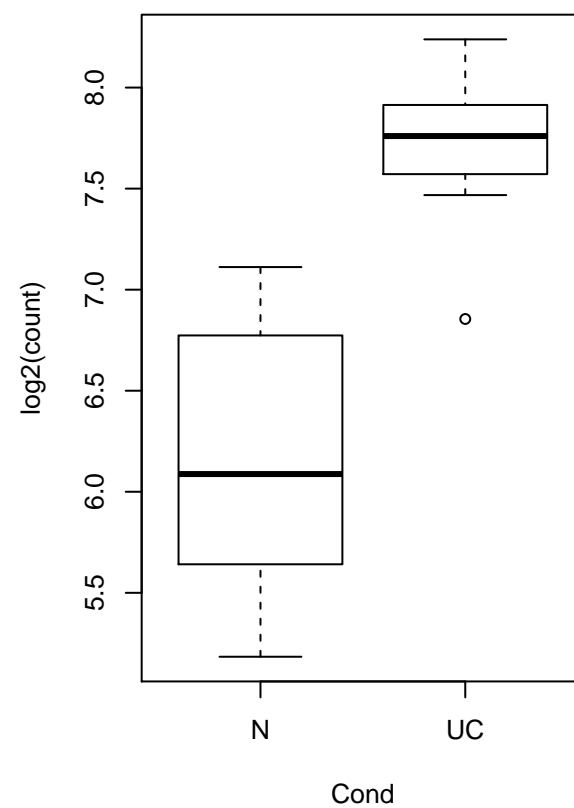

REG1B average UC-N %methylation max=3.47% min=-26.61%

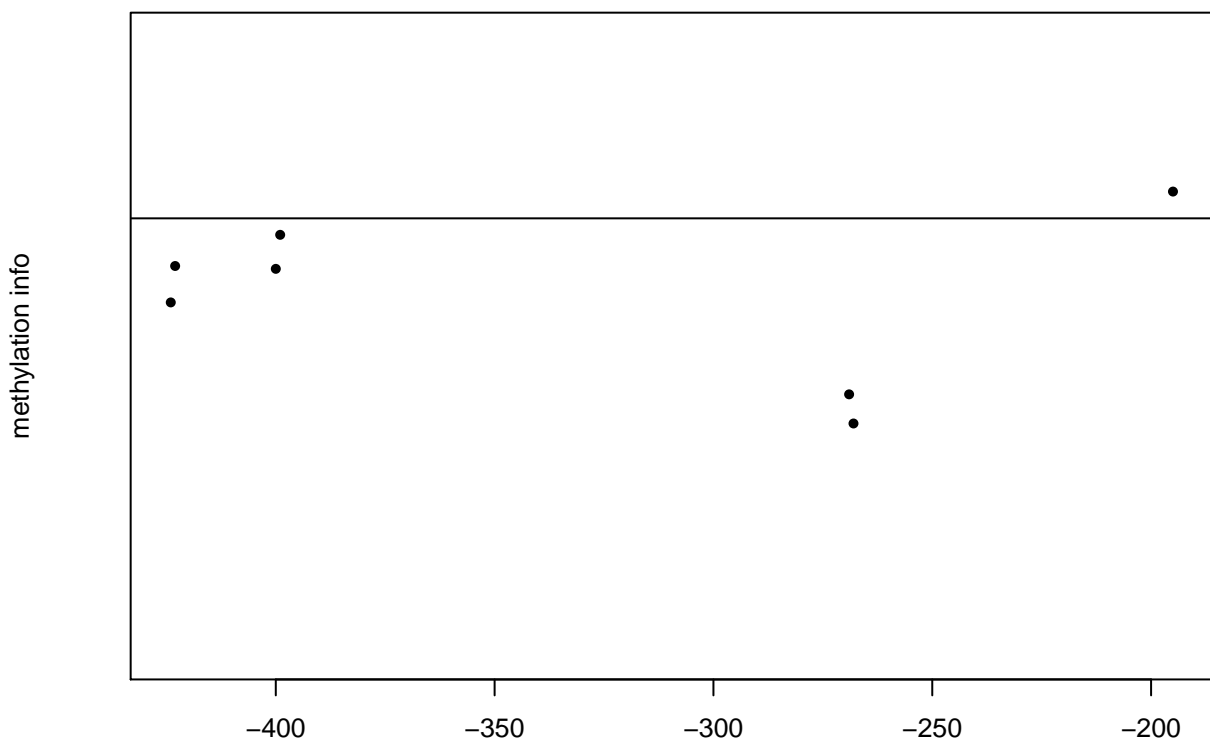

REG1B raw %methylation, red=UC, blue=Normal

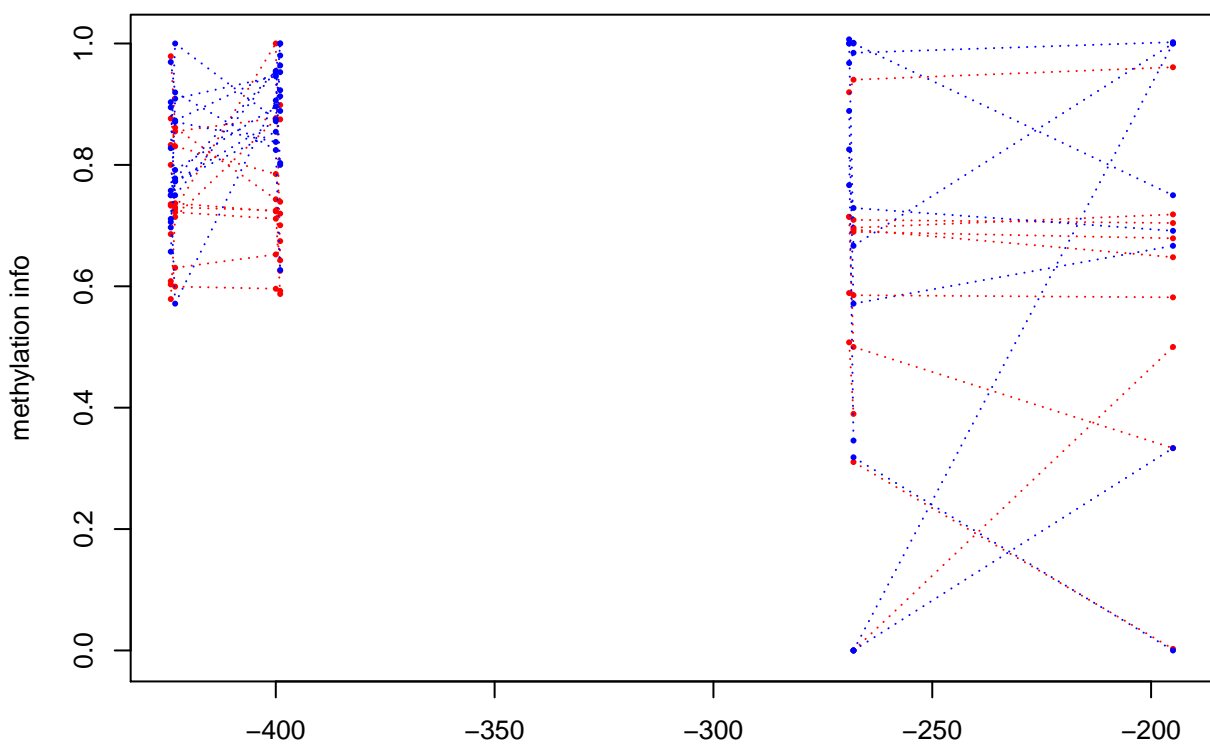

RNAseq logFC(UC-N)= 3.73

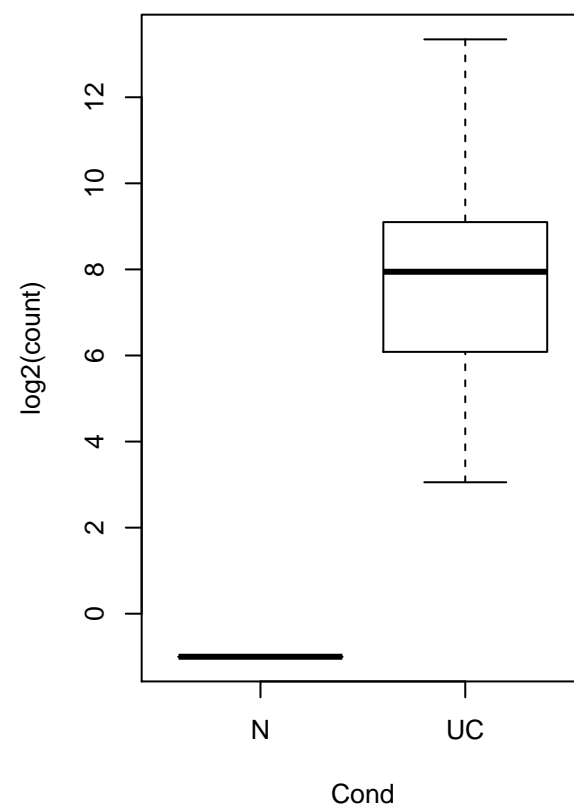



RGCC average UC-N %methylation max=4.1% min=-3.2%

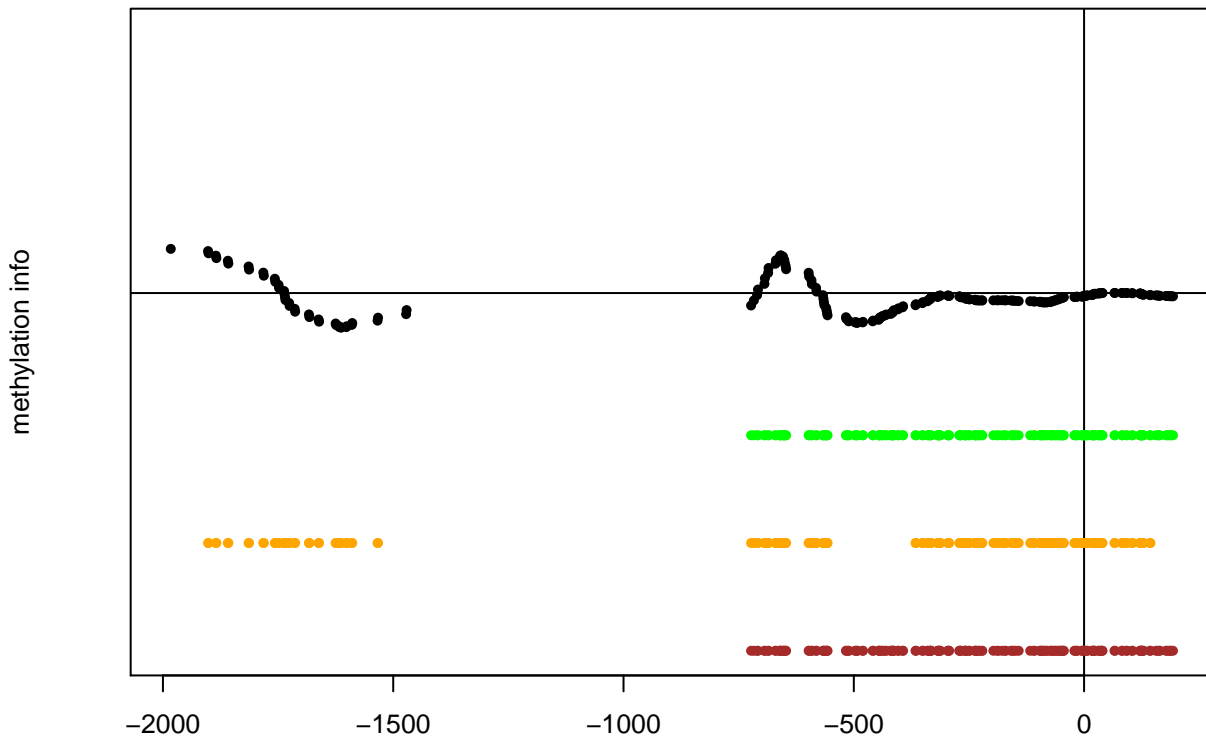

RGCC raw %methylation, red=UC, blue=Normal

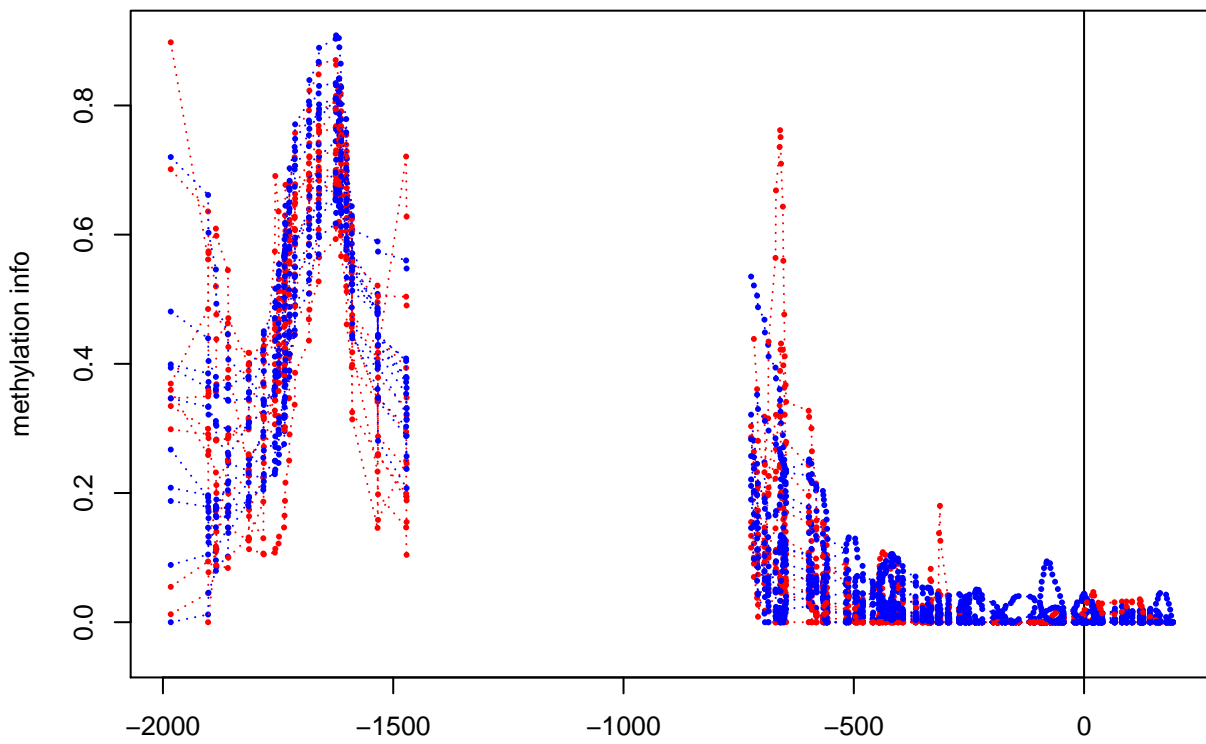

RNAseq logFC(UC-N)= 1.15

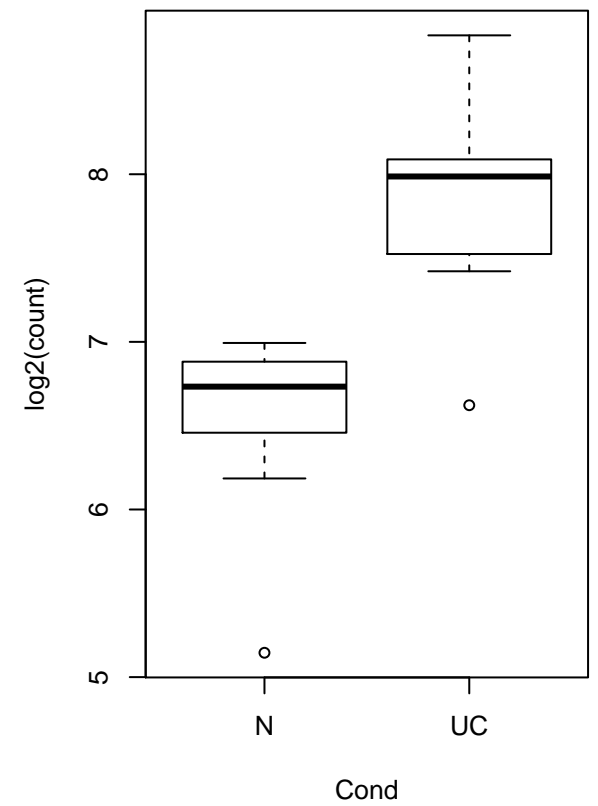

RMDN2 average UC-N %methylation max=18.65% min=-0.55%

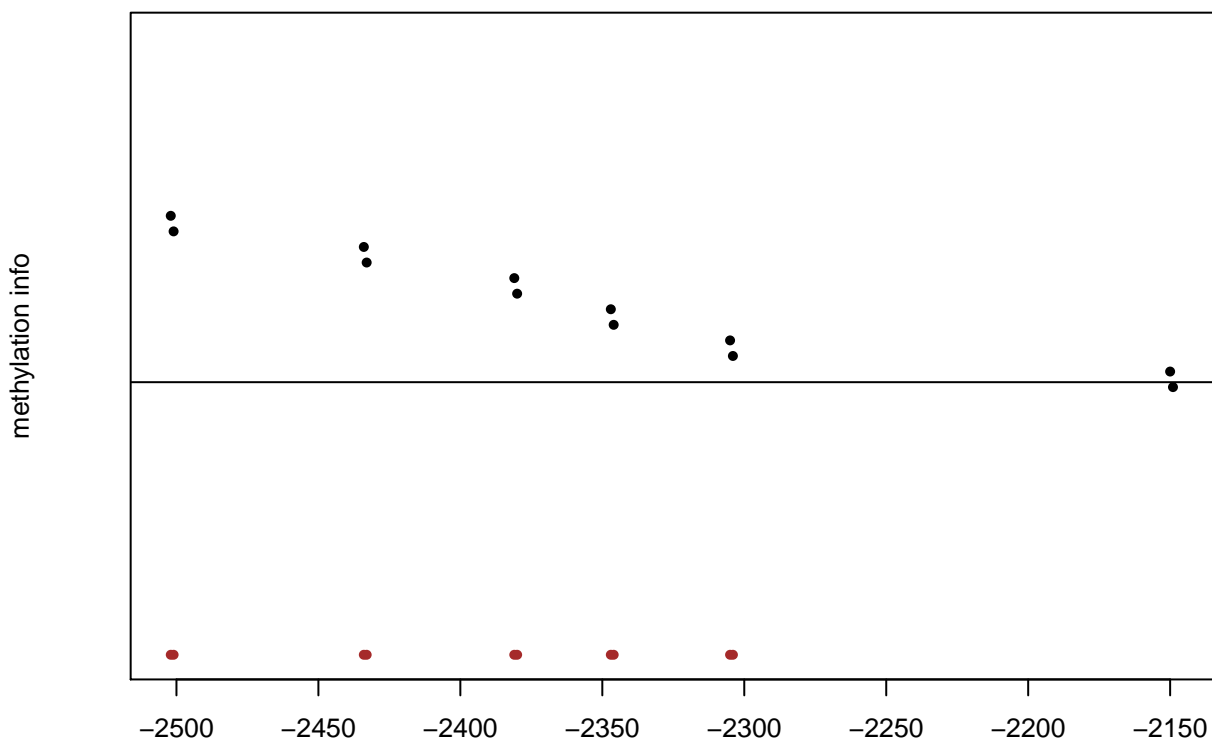

RMDN2 raw %methylation, red=UC, blue=Normal

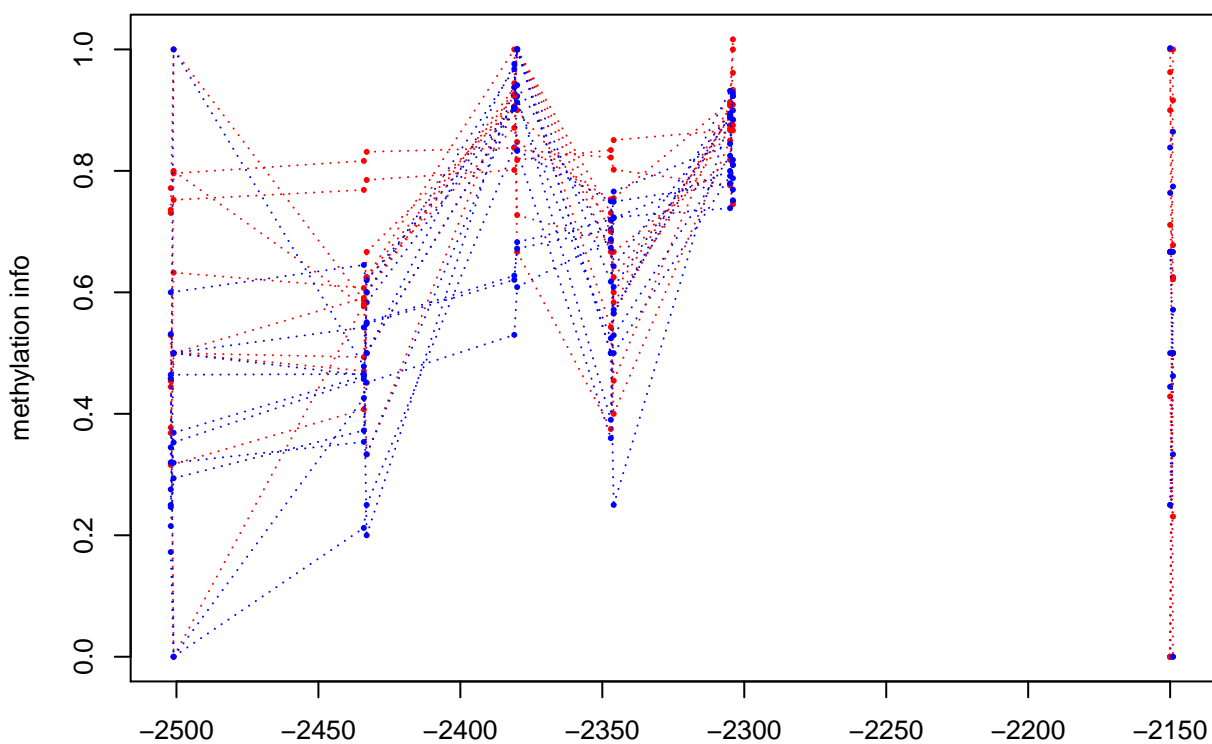

RNAseq logFC(UC-N) = -1.23

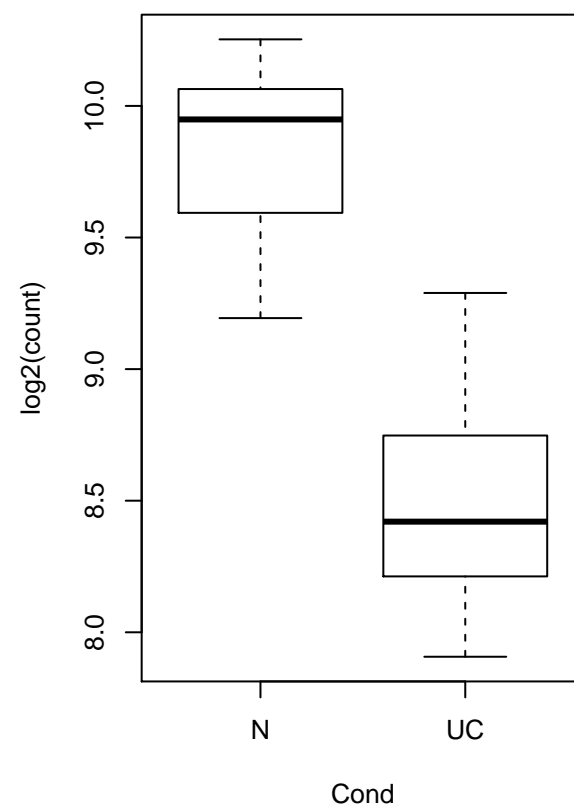

**RNASE1 average UC-N %methylation max=15.41% min=4.04%**

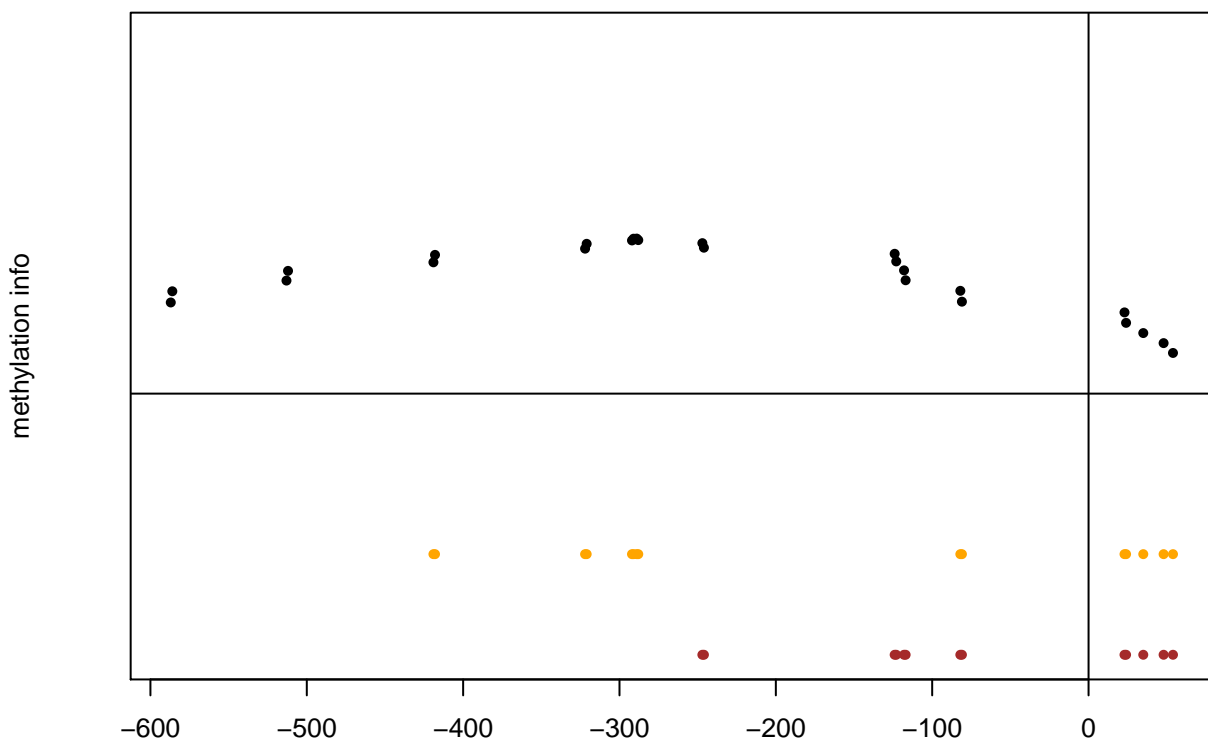

**RNASE1 raw %methylation, red=UC, blue=Normal**

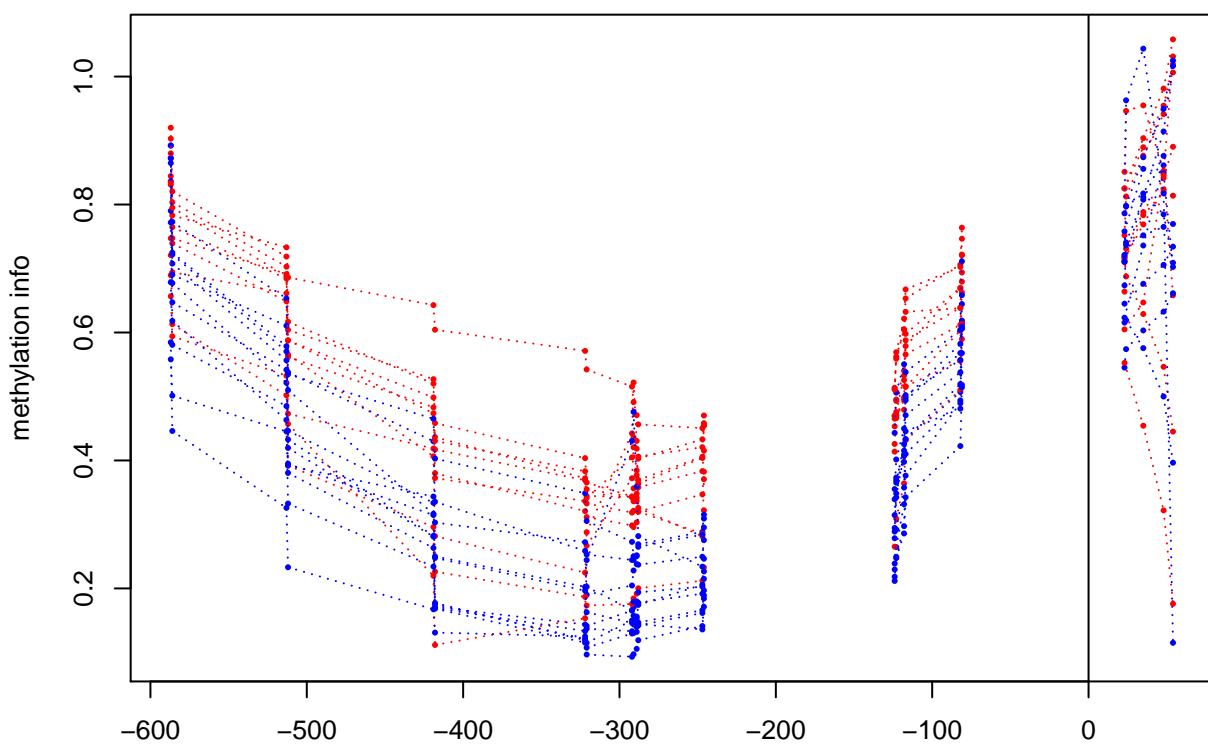

**RNaseq logFC(UC-N)= -1.06**

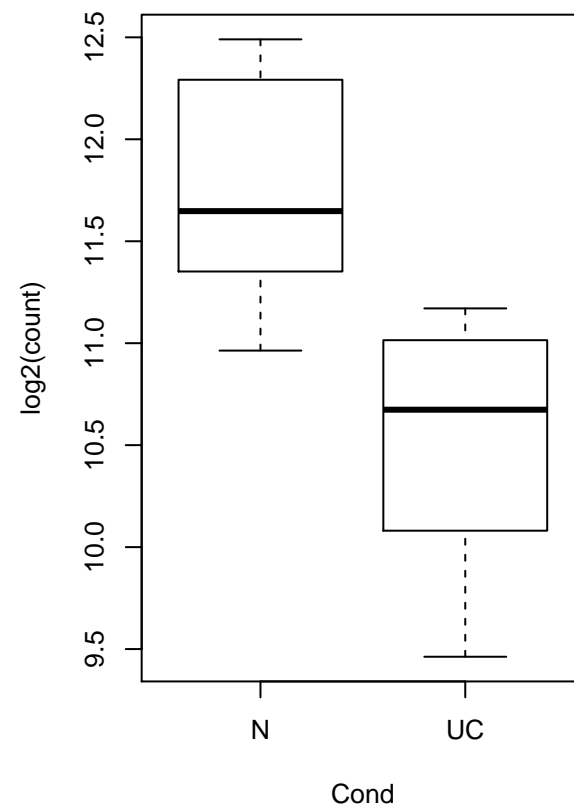

RNF128 average UC-N %methylation max=19.52% min=4.3%

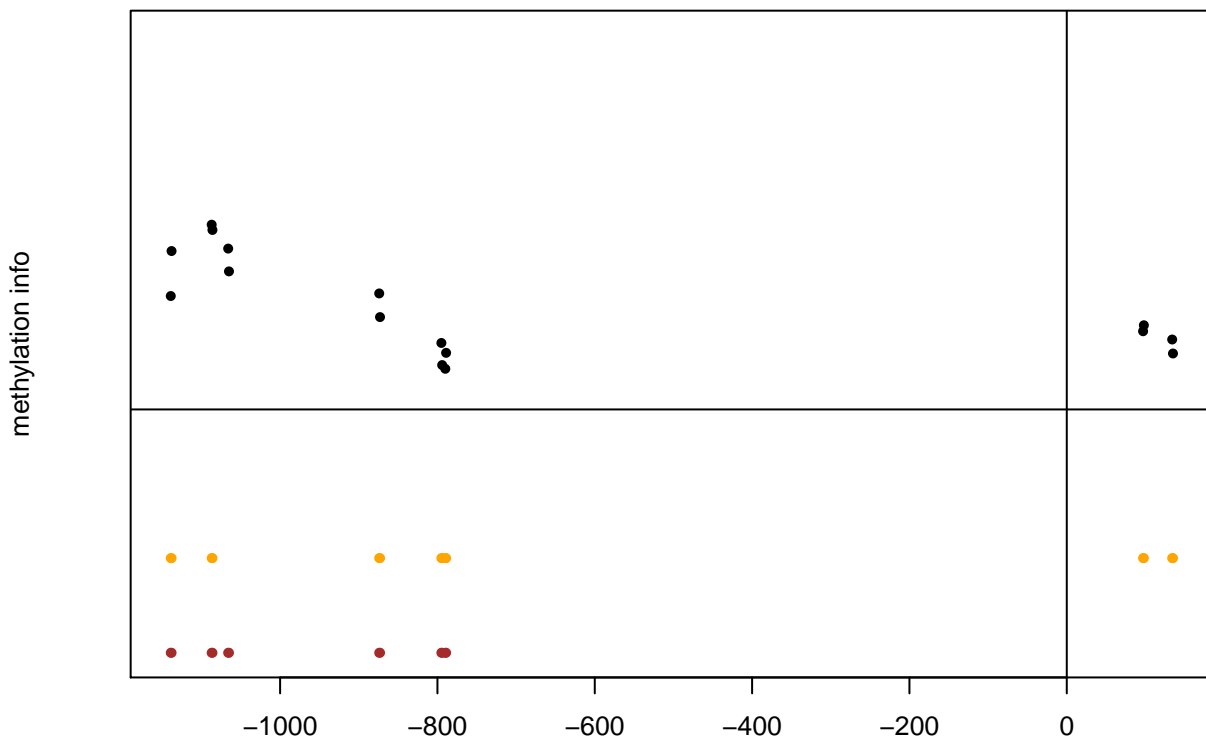

RNF128 raw %methylation, red=UC, blue=Normal

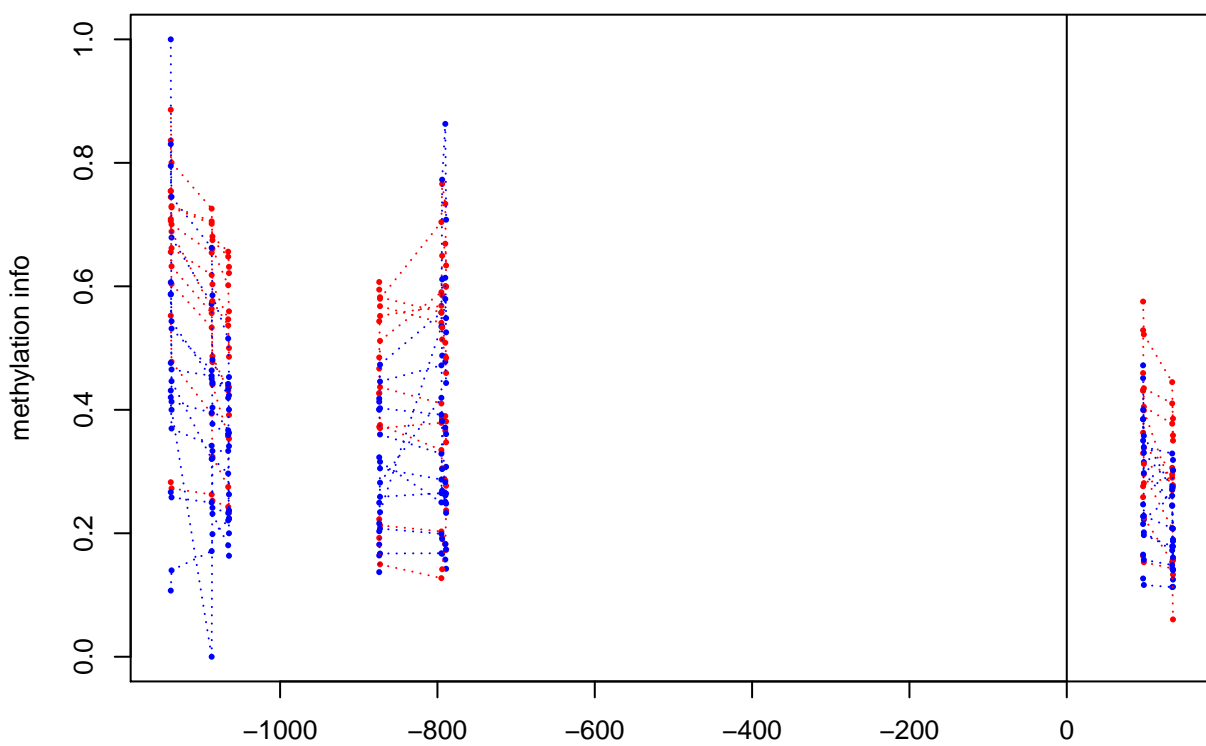

RNAseq logFC(UC-N)= -1.29

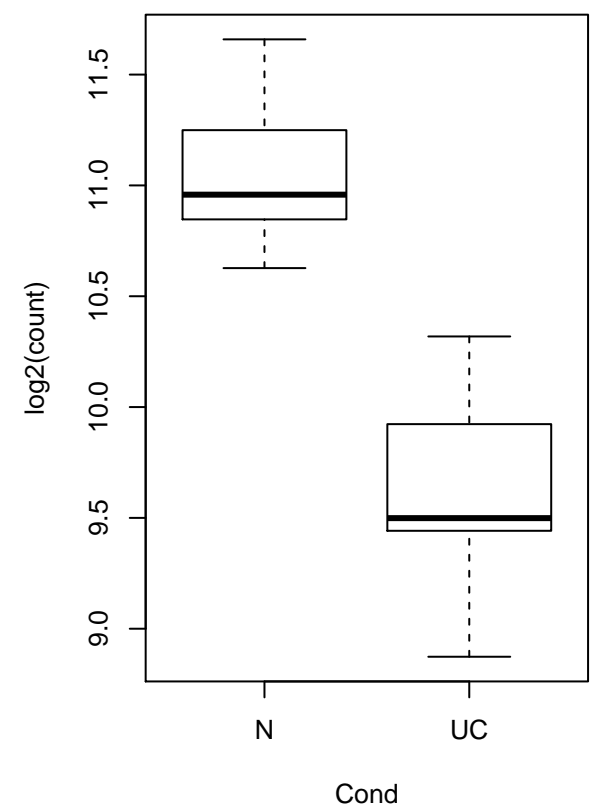

ROBO1 average UC-N %methylation max=-2.09% min=-2.59%

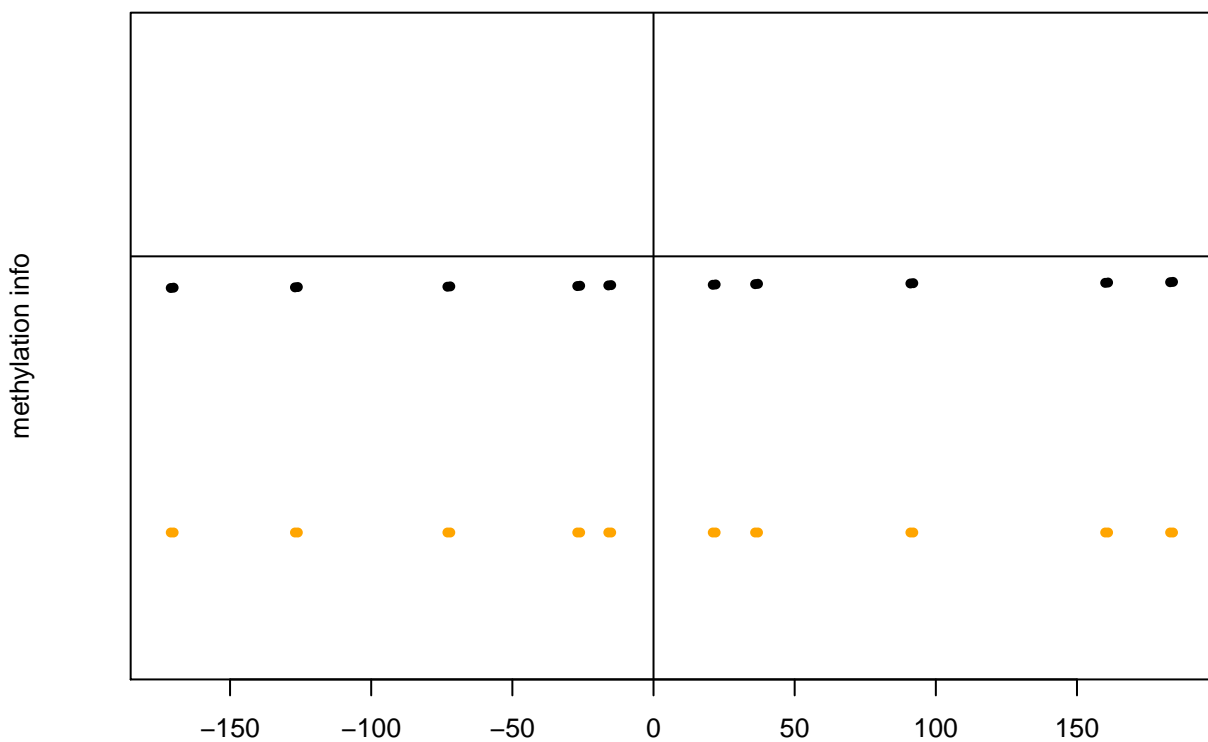

ROBO1 raw %methylation, red=UC, blue=Normal

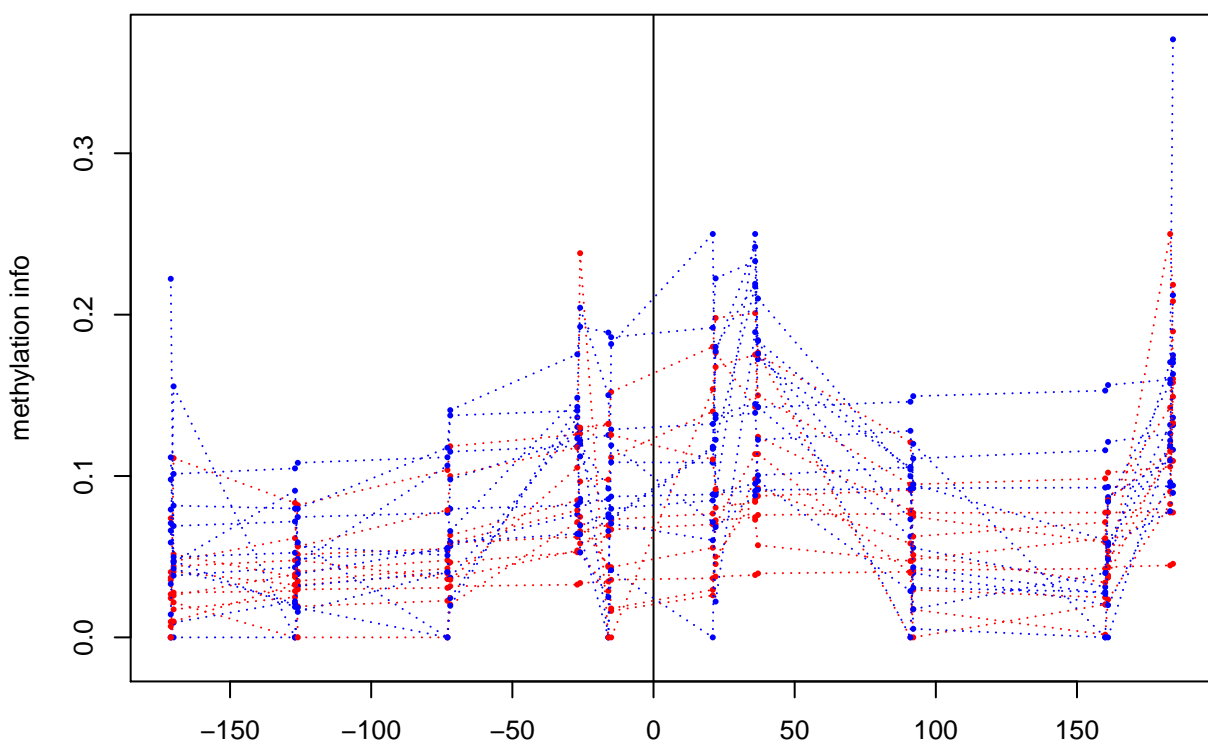

RNAseq logFC(UC-N)= 1.04

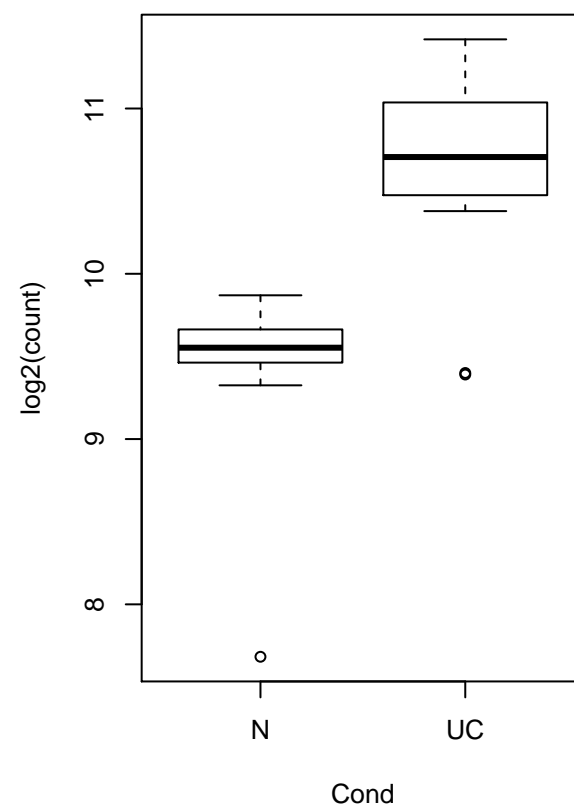

RTEL1 average UC-N %methylation max=-8.1% min=-19.77%

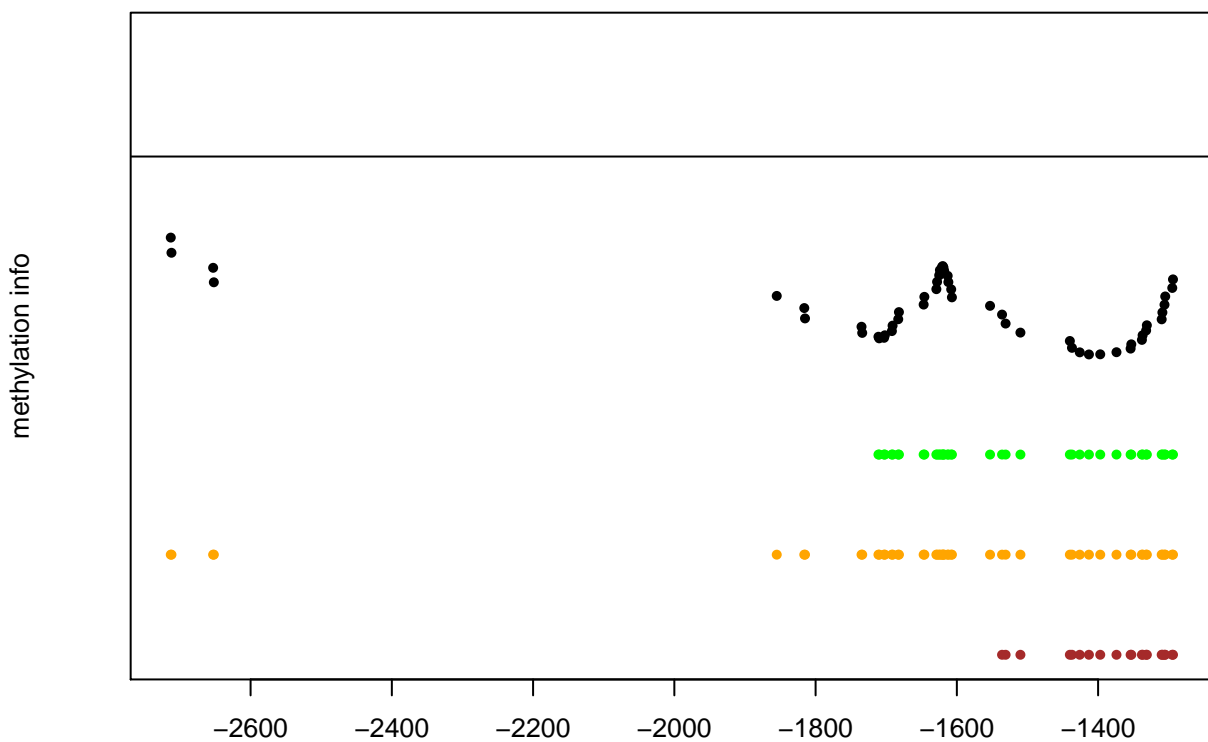

RTEL1 raw %methylation, red=UC, blue=Normal

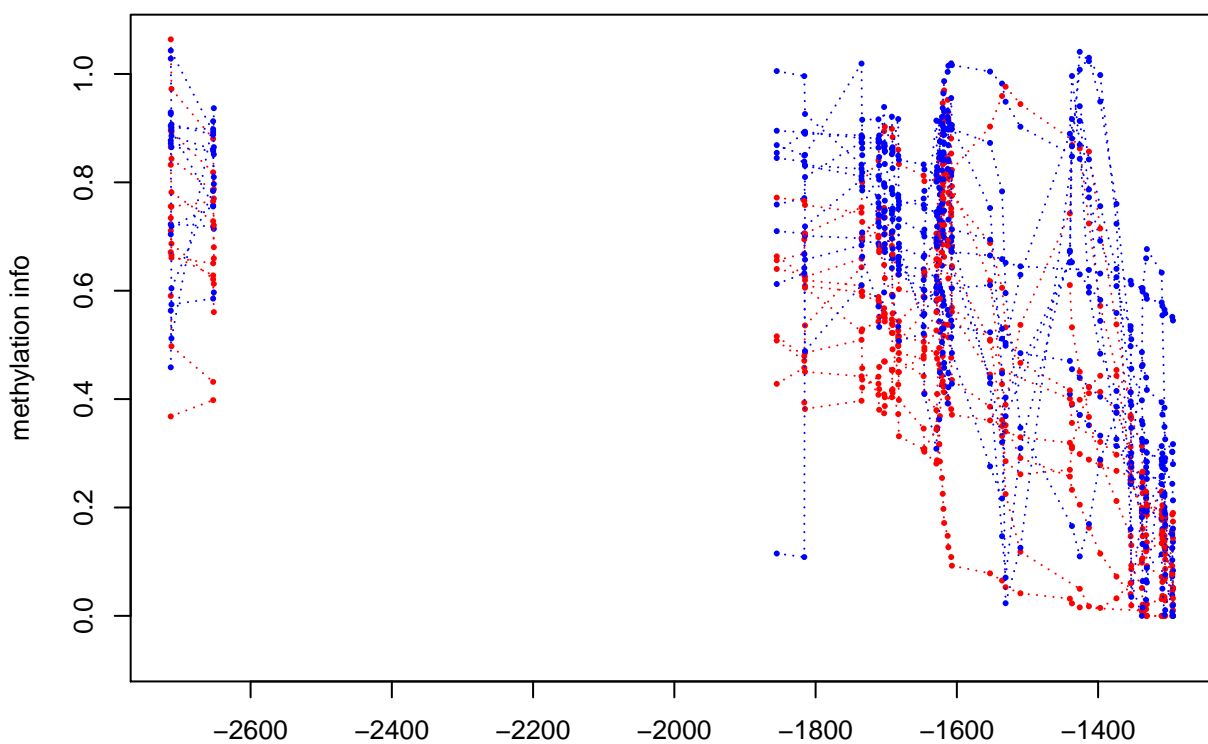

RNAseq logFC(UC-N)= 2.24

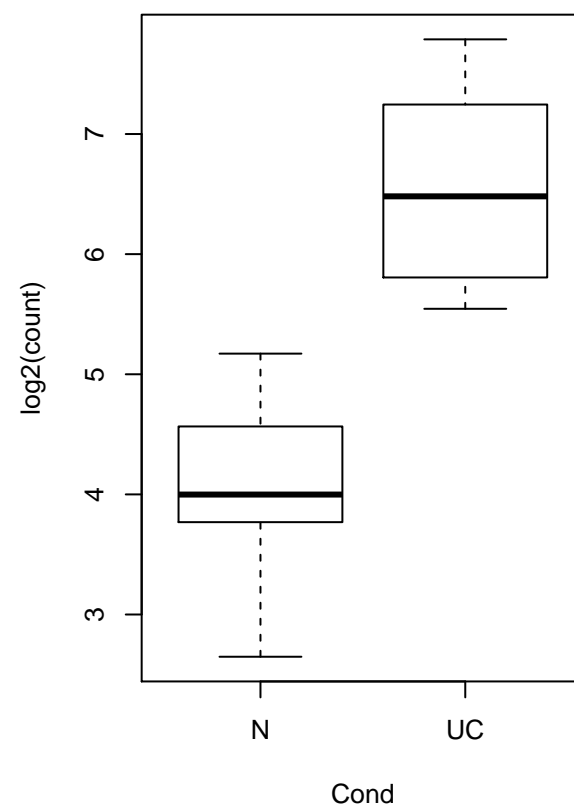

RUNX3 average UC-N %methylation max=-17.75% min=-50.4%

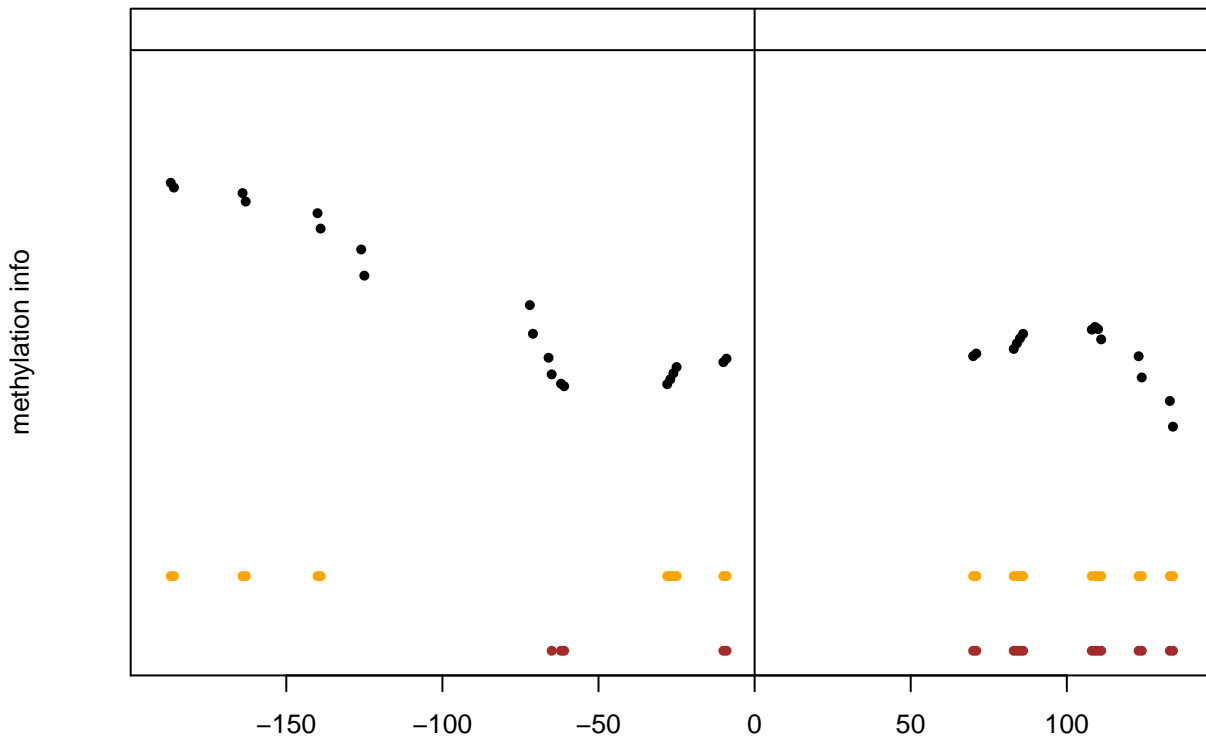

RUNX3 raw %methylation, red=UC, blue=Normal

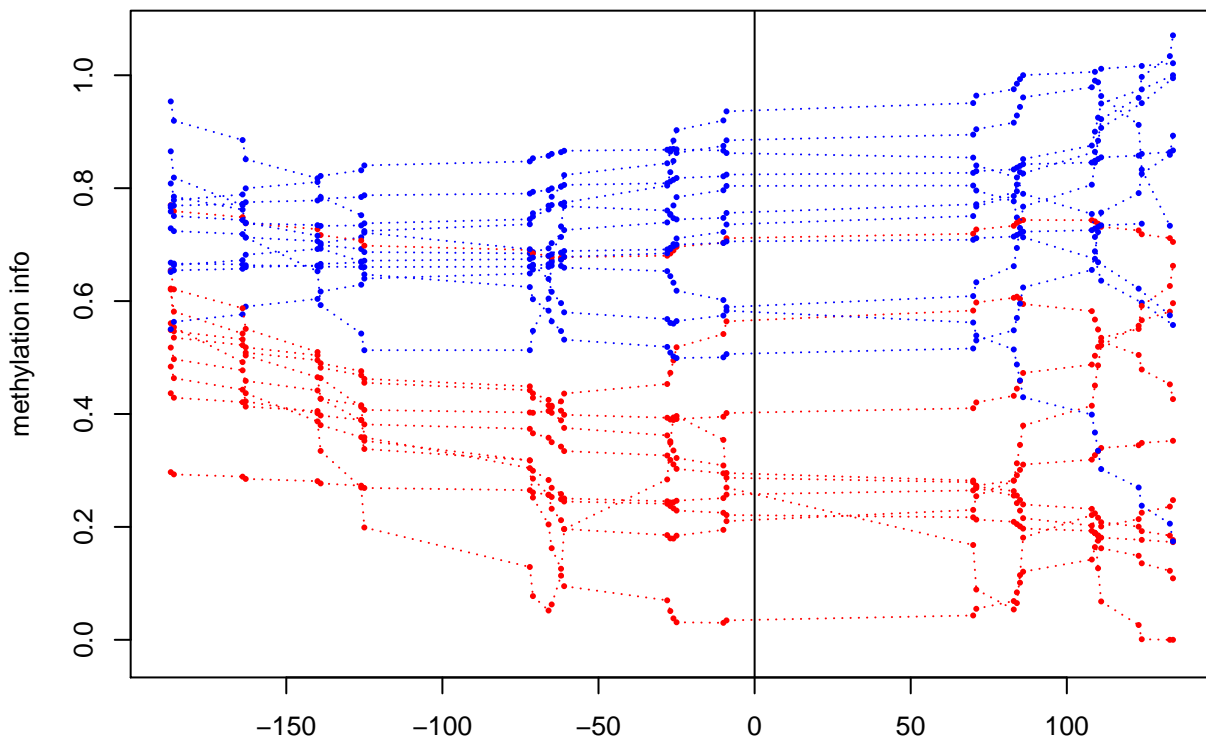

RNAseq logFC(UC-N)= 1.35

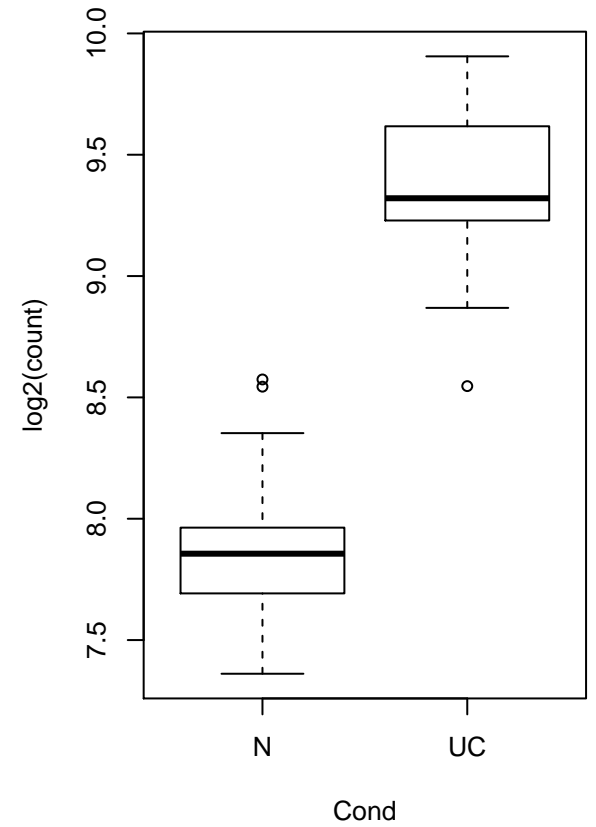

S100A9 average UC-N %methylation max=-0.54% min=-28.44%

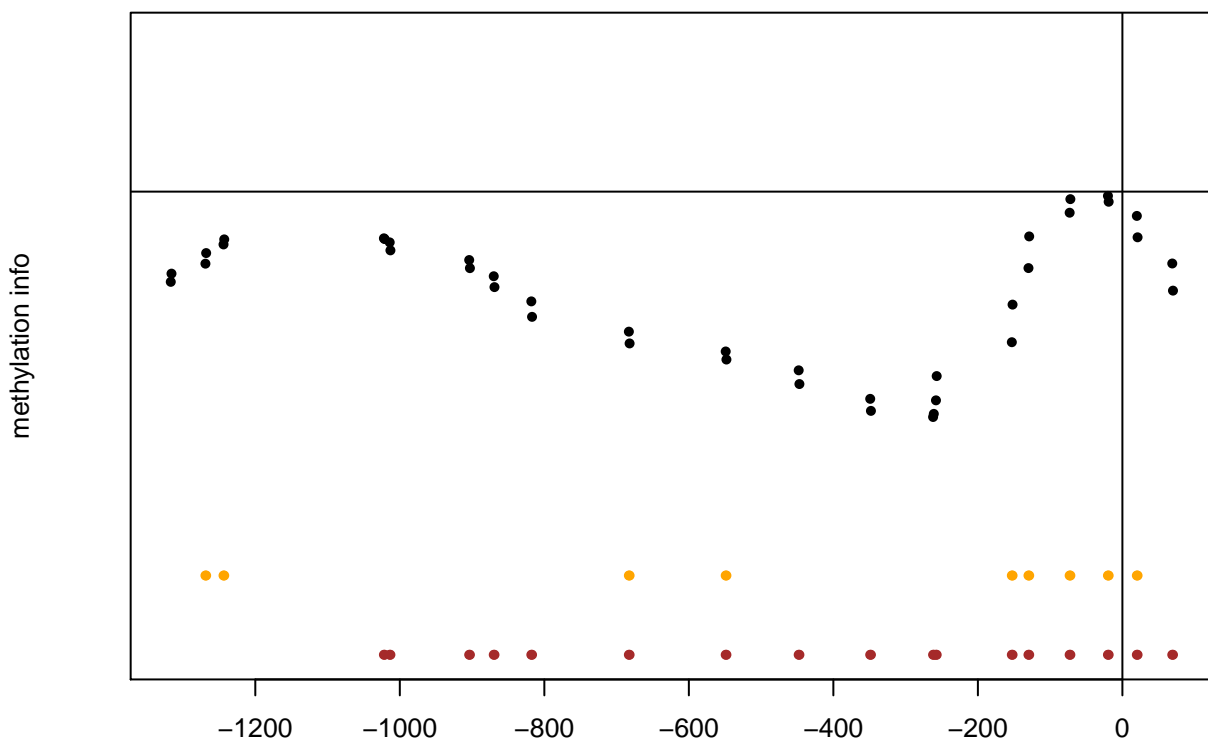

S100A9 raw %methylation, red=UC, blue=Normal

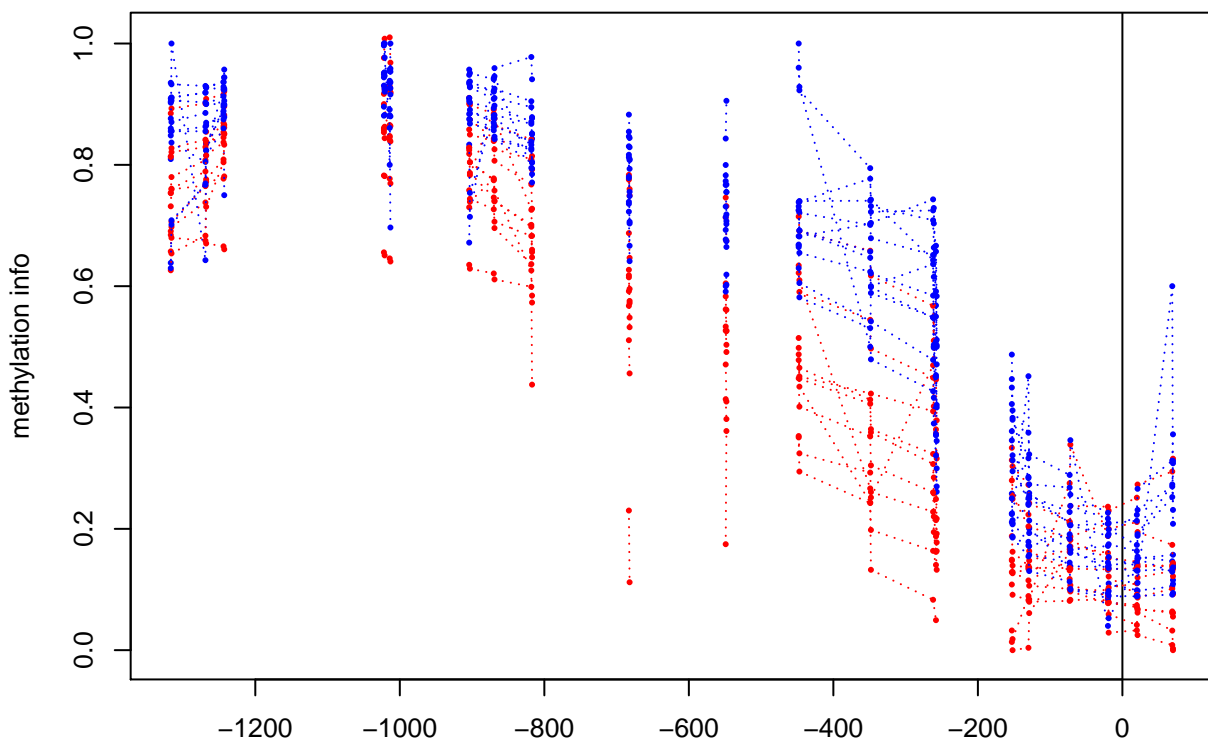

RNAseq logFC(UC-N)= 3.46

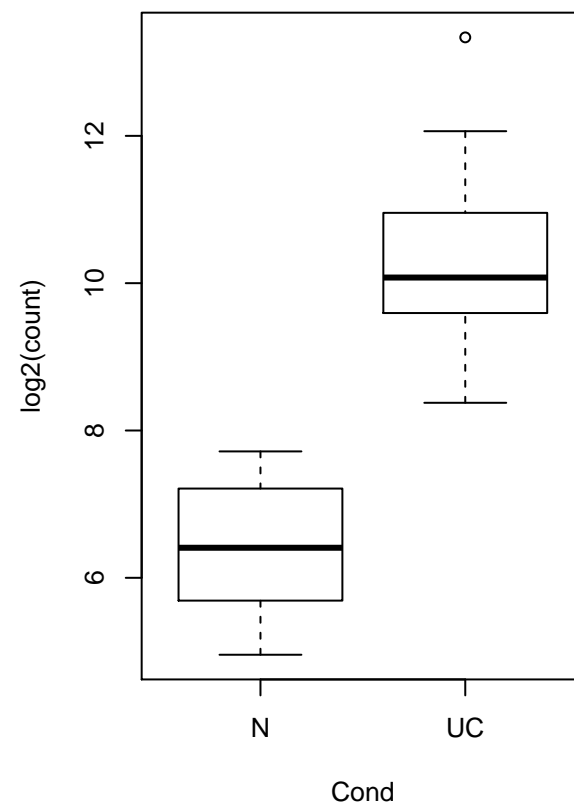



S1PR3 average UC-N %methylation max=-0.08% min=-24.27%

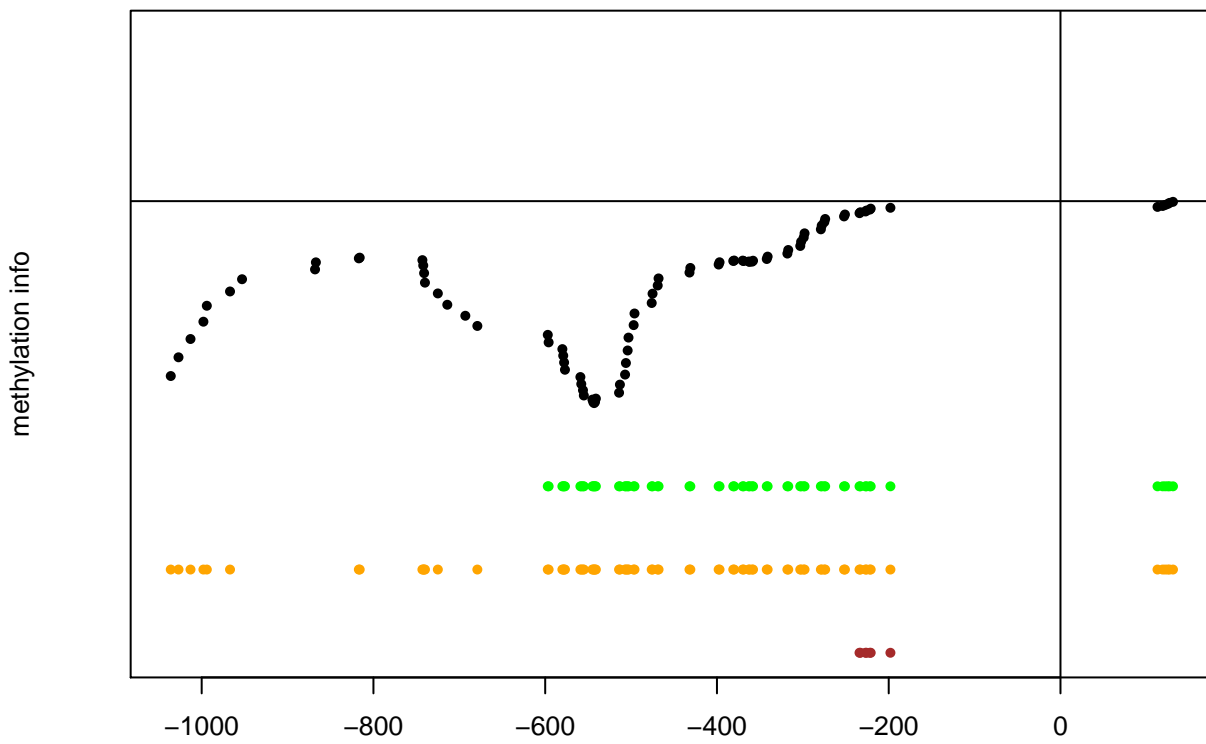

S1PR3 raw %methylation, red=UC, blue=Normal

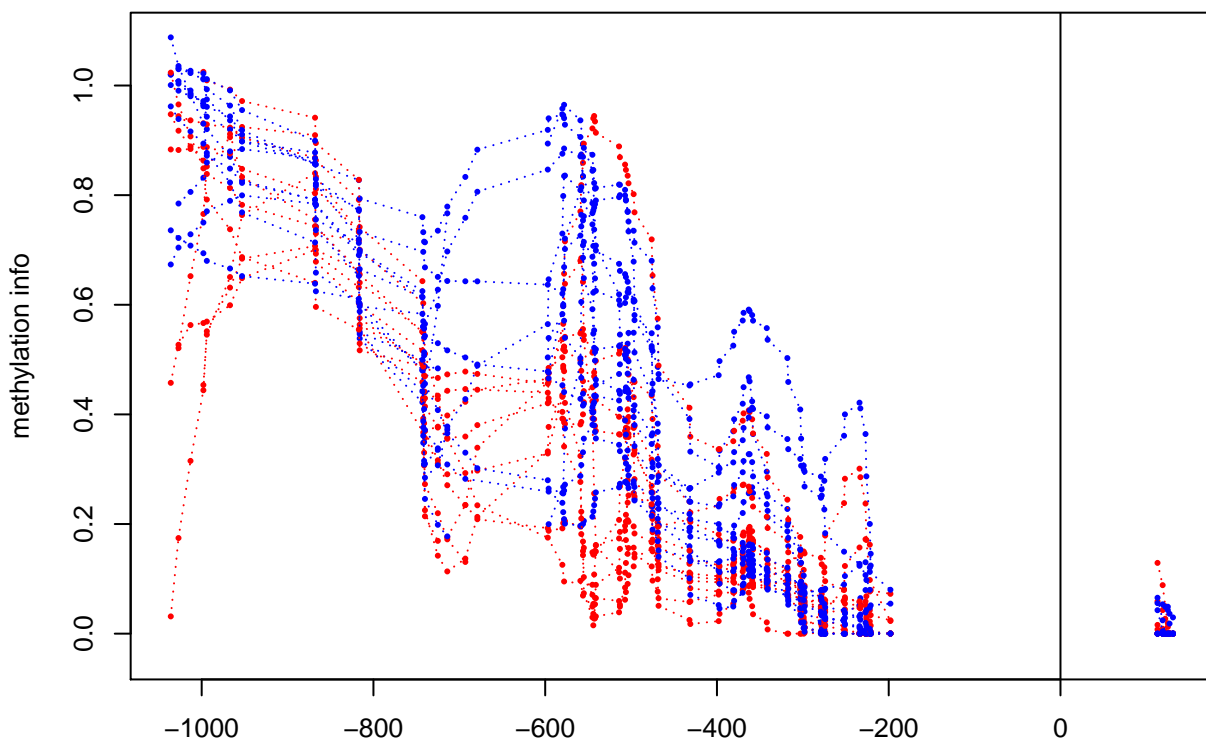

RNAseq logFC(UC-N)= 1.39

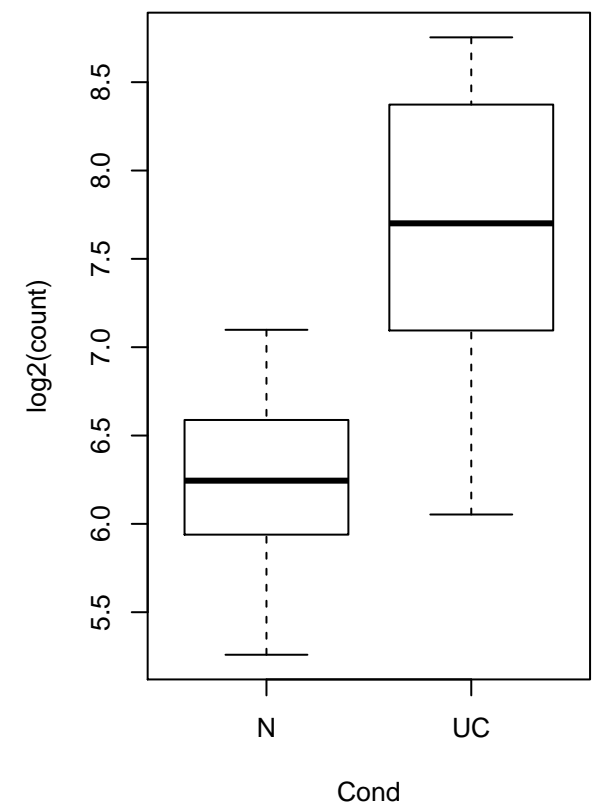

S1PR4 average UC-N %methylation max=-4.21% min=-44.27%

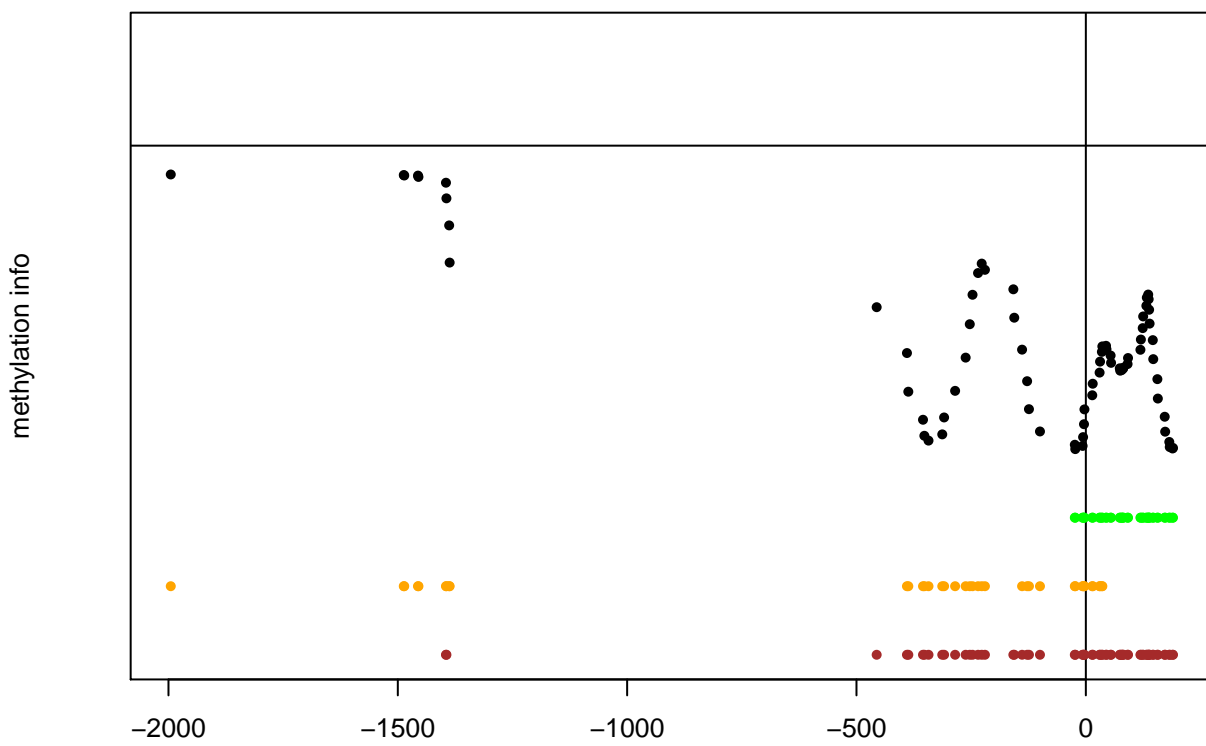

S1PR4 raw %methylation, red=UC, blue=Normal

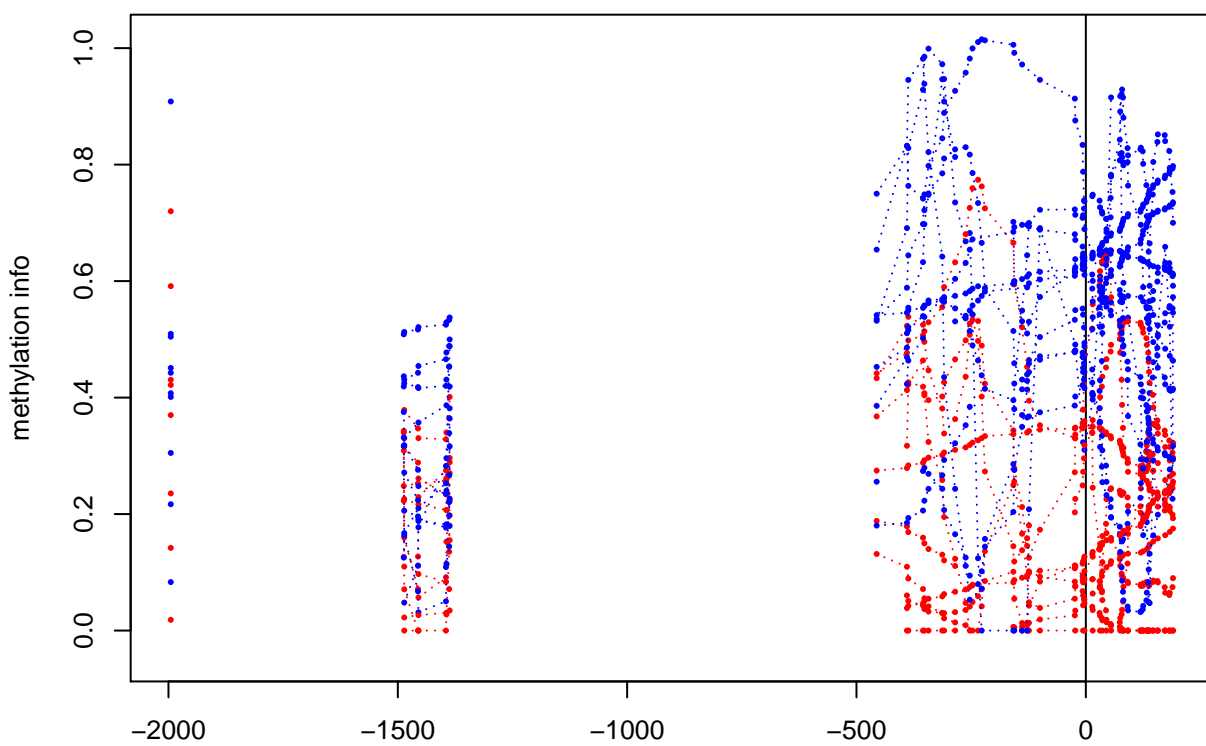

RNAseq logFC(UC-N)= 1.76

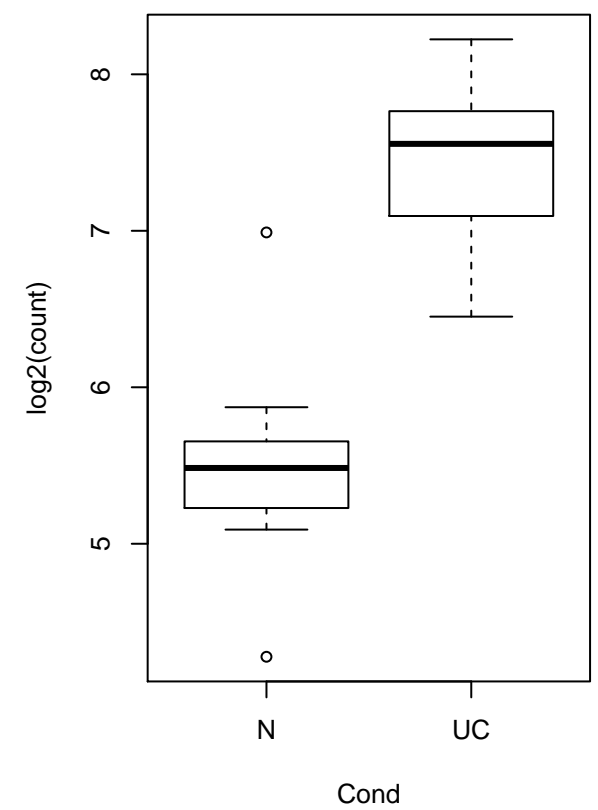

SAA1 average UC-N %methylation max=14.4% min=-46.42%

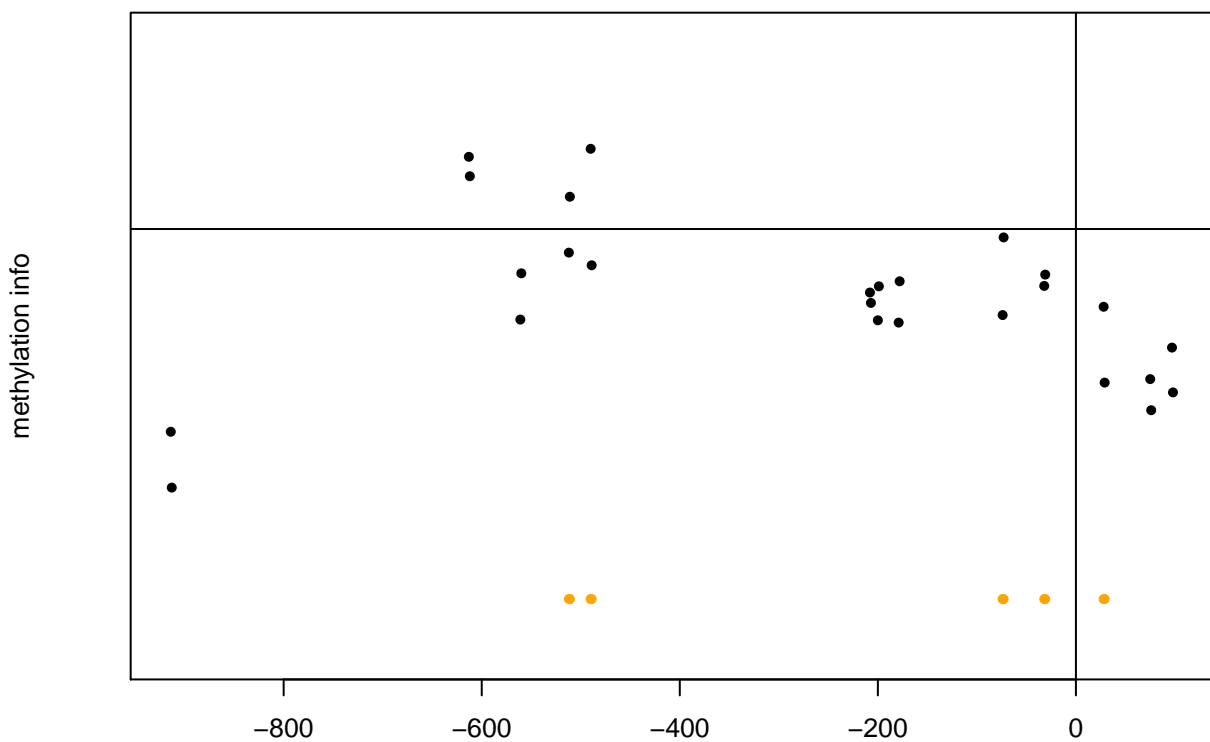

SAA1 raw %methylation, red=UC, blue=Normal

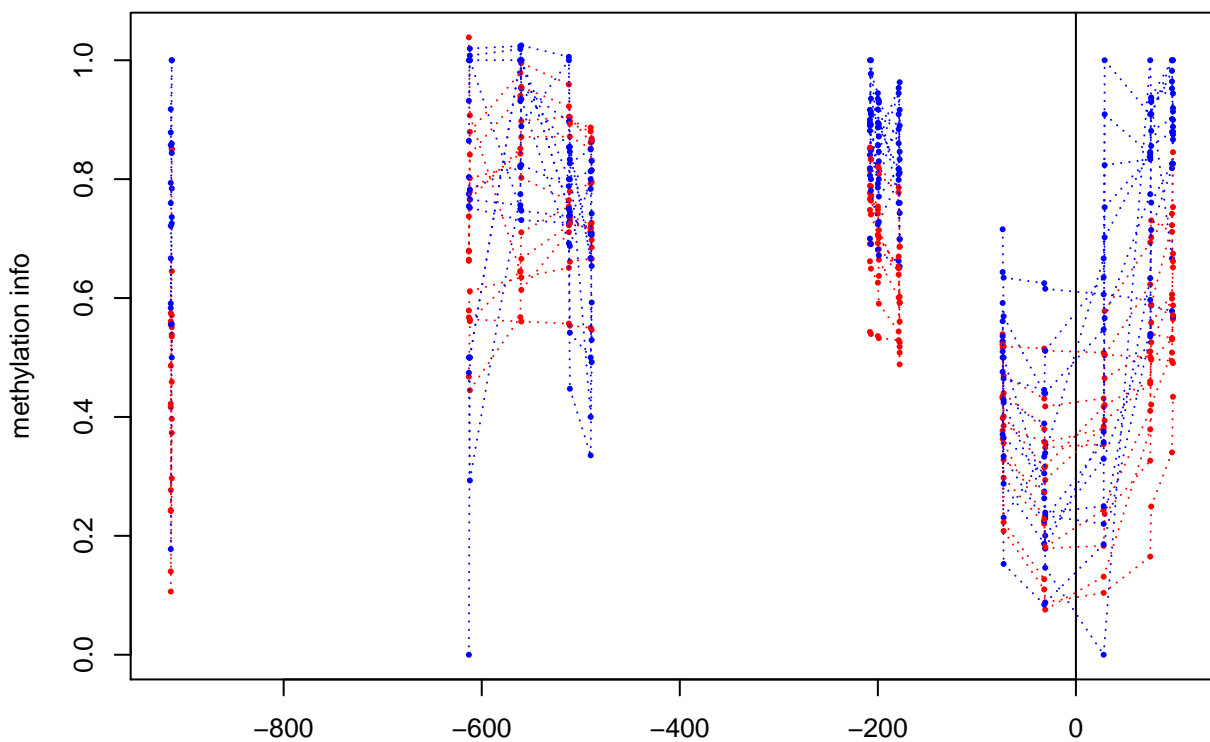

RNAseq logFC(UC-N)= 6.4

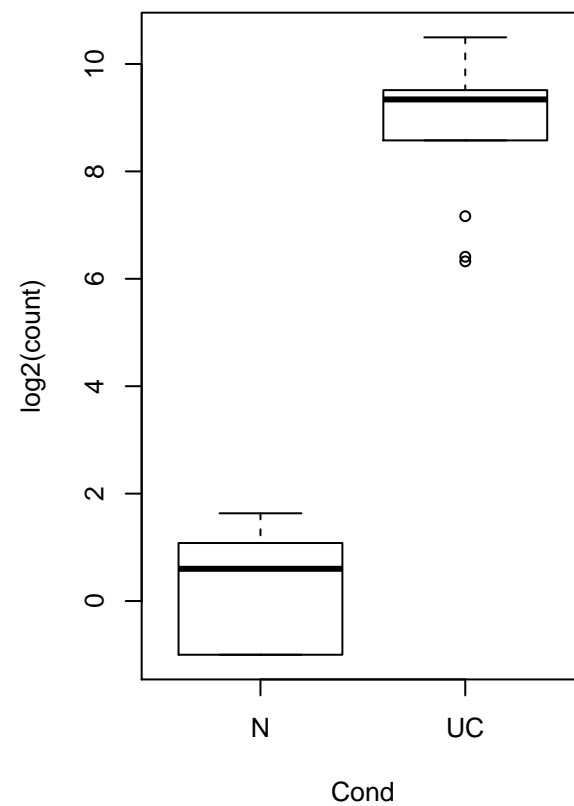

SAA2 average UC-N %methylation max=-5.52% min=-20.55%

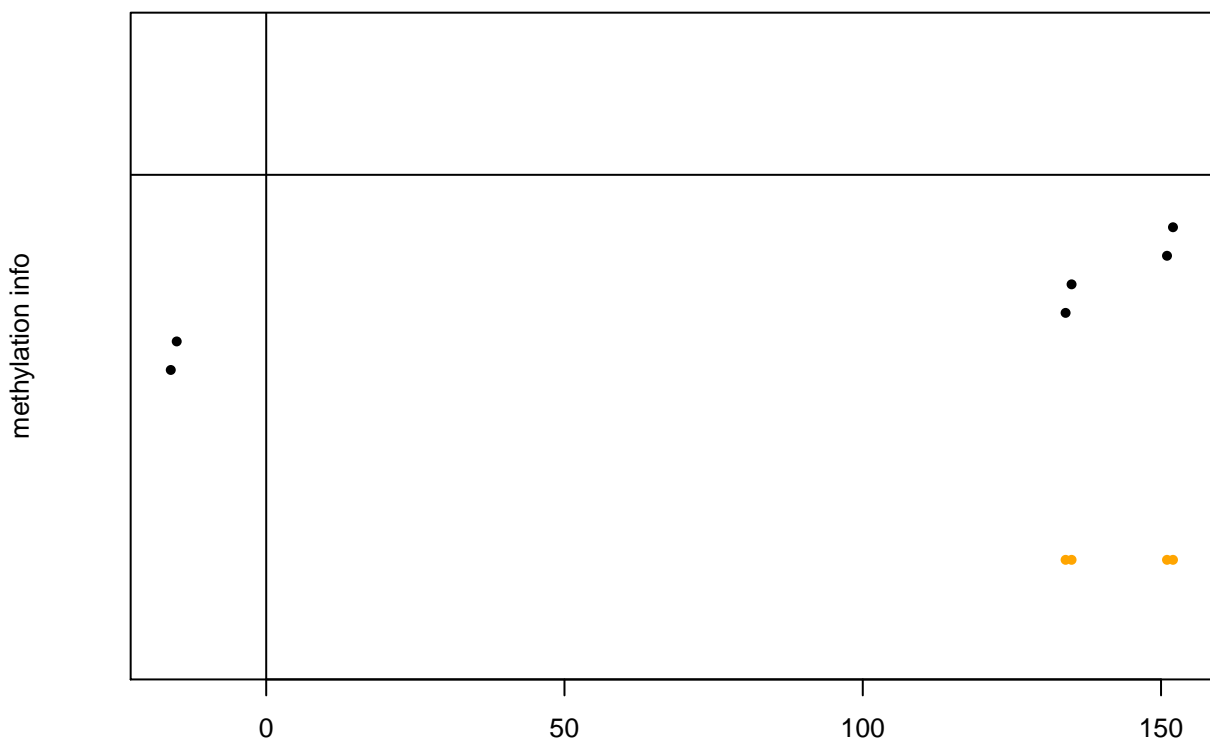

SAA2 raw %methylation, red=UC, blue=Normal

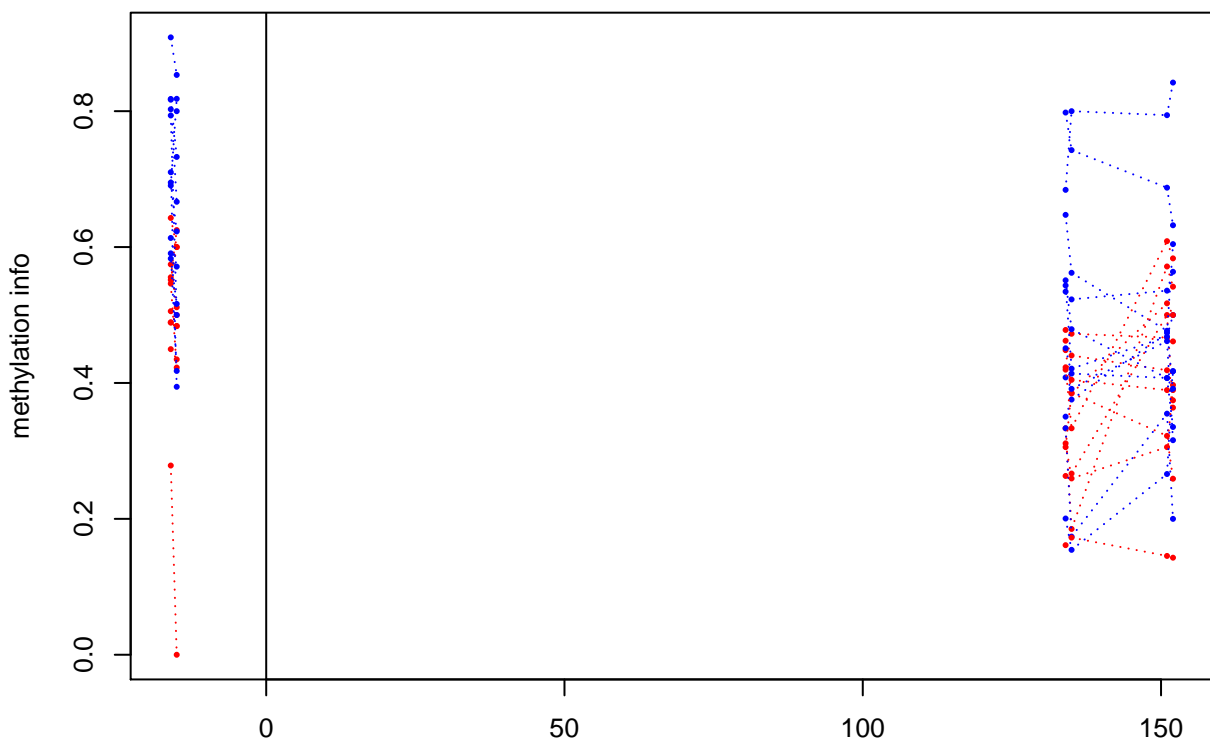

RNAseq logFC(UC-N)= 6.23

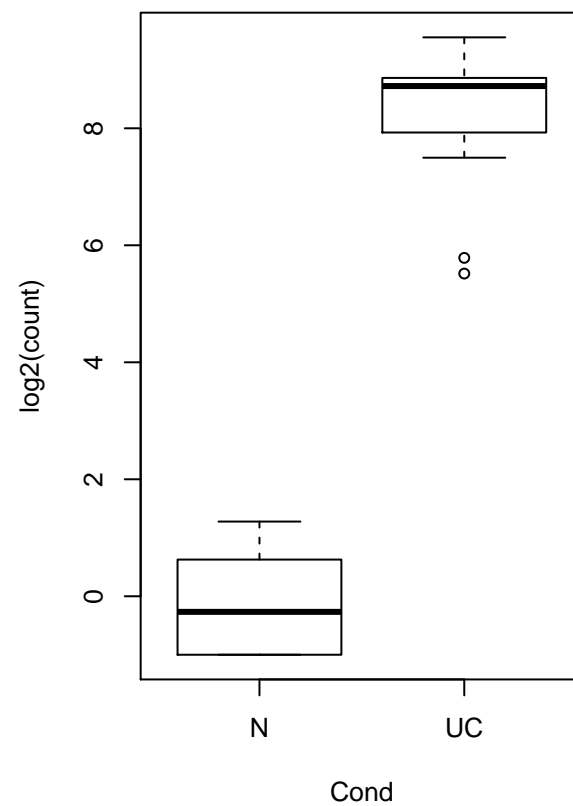

SASH3 average UC-N %methylation max=-15.36% min=-31.02%

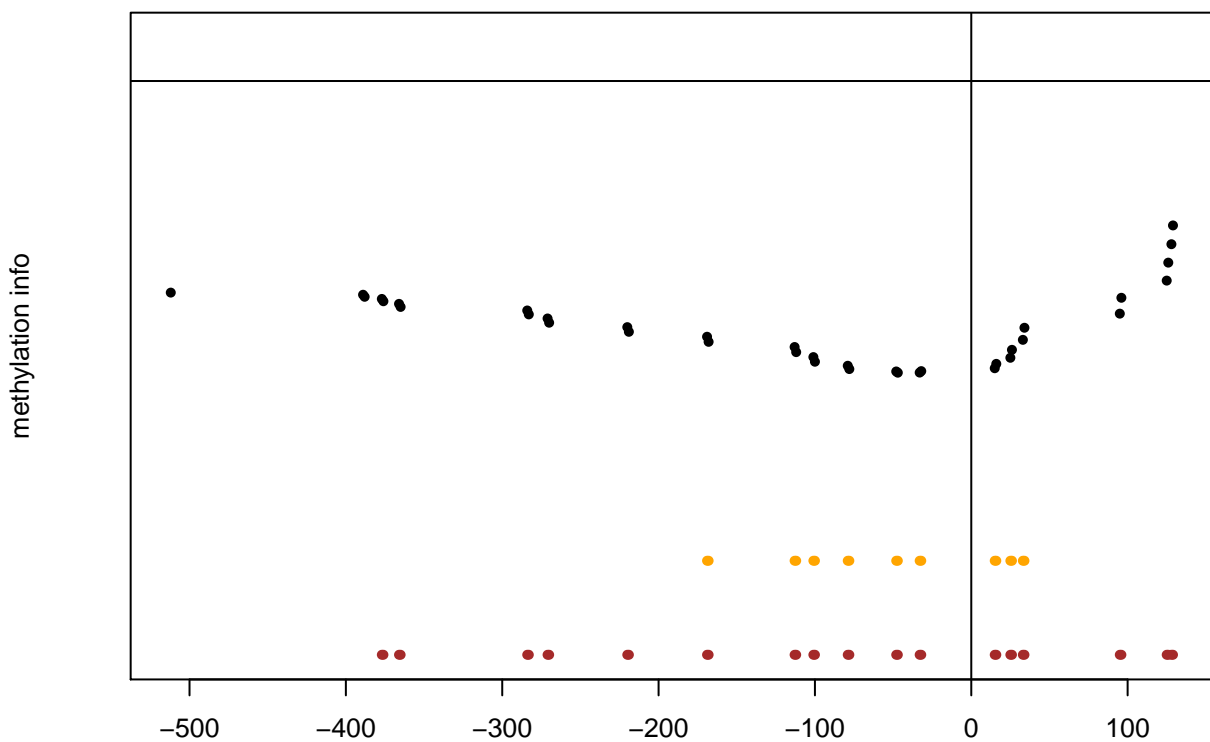

SASH3 raw %methylation, red=UC, blue=Normal

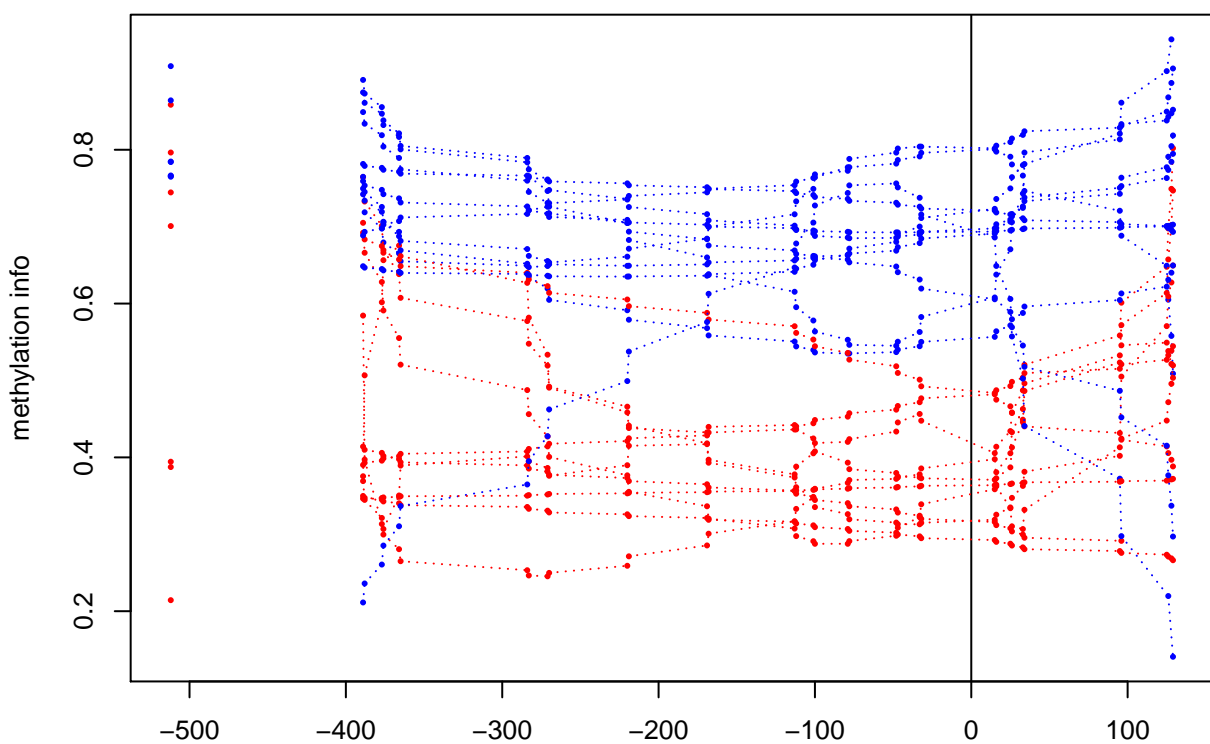

RNAseq logFC(UC-N)= 1.4

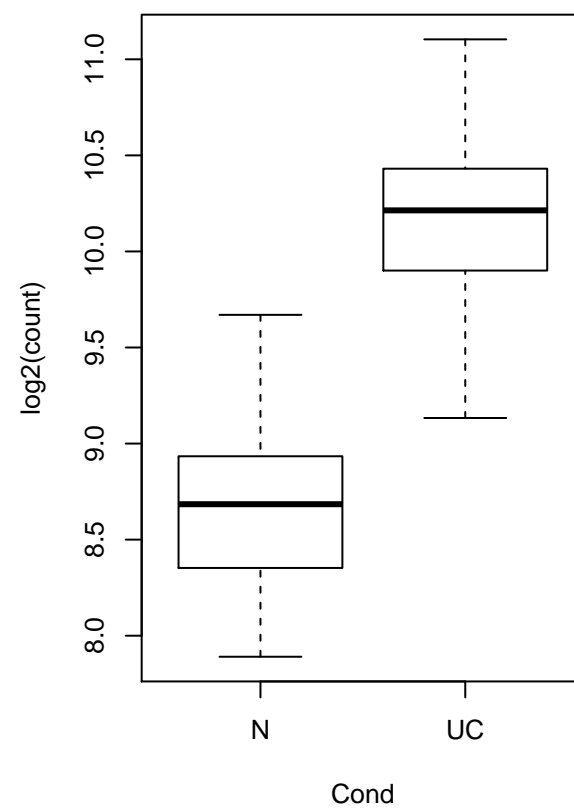

SCIMP average UC-N %methylation max=-6.78% min=-27.99%

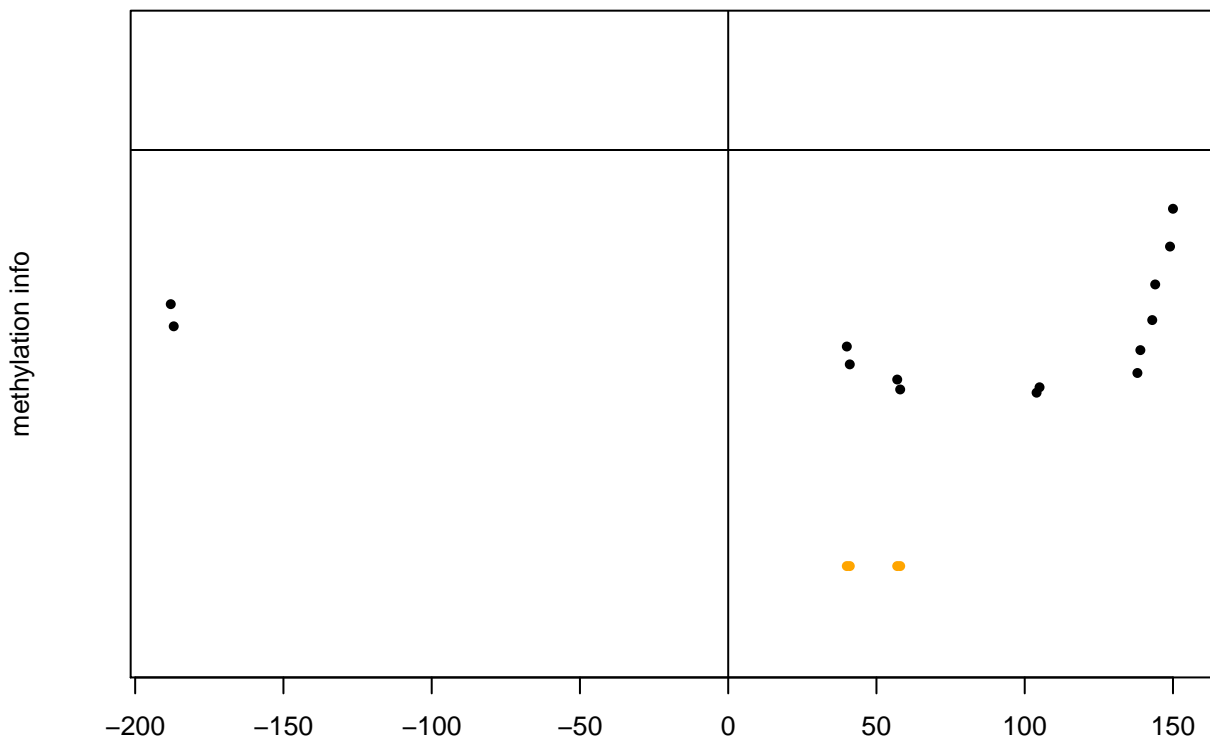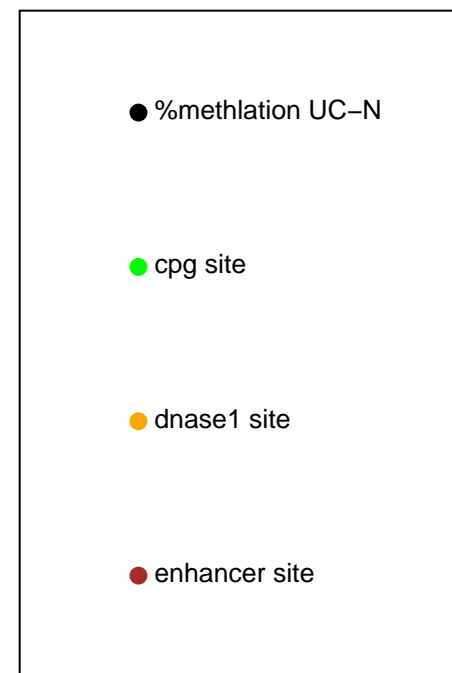

SCIMP raw %methylation, red=UC, blue=Normal

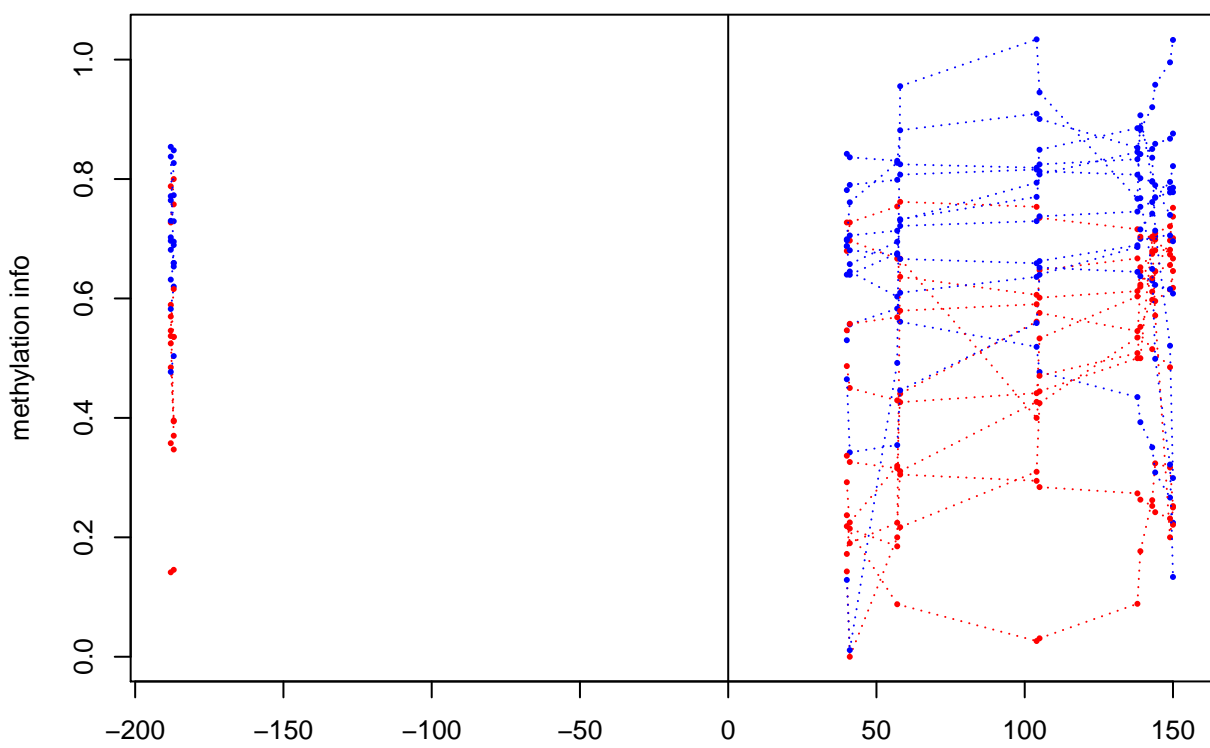

RNAseq logFC(UC-N)= 1.07

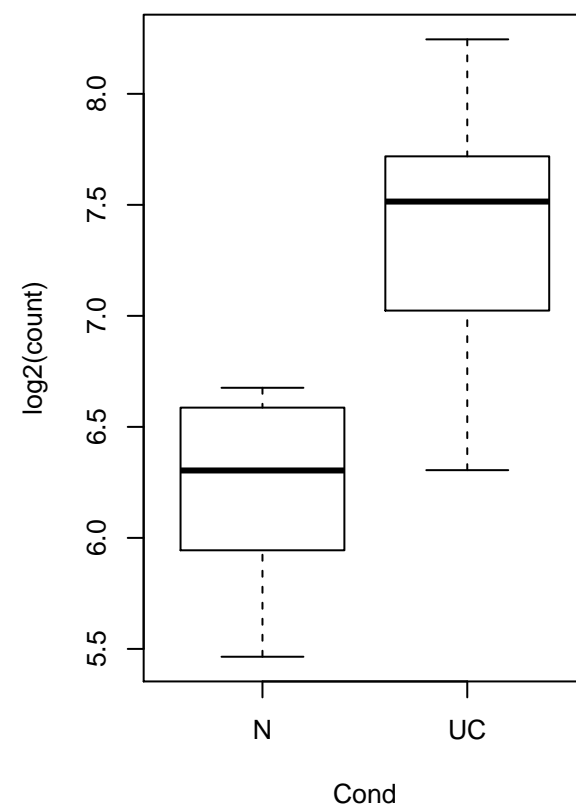

SELENBP1 average UC-N %methylation max=28.26% min=9.49%

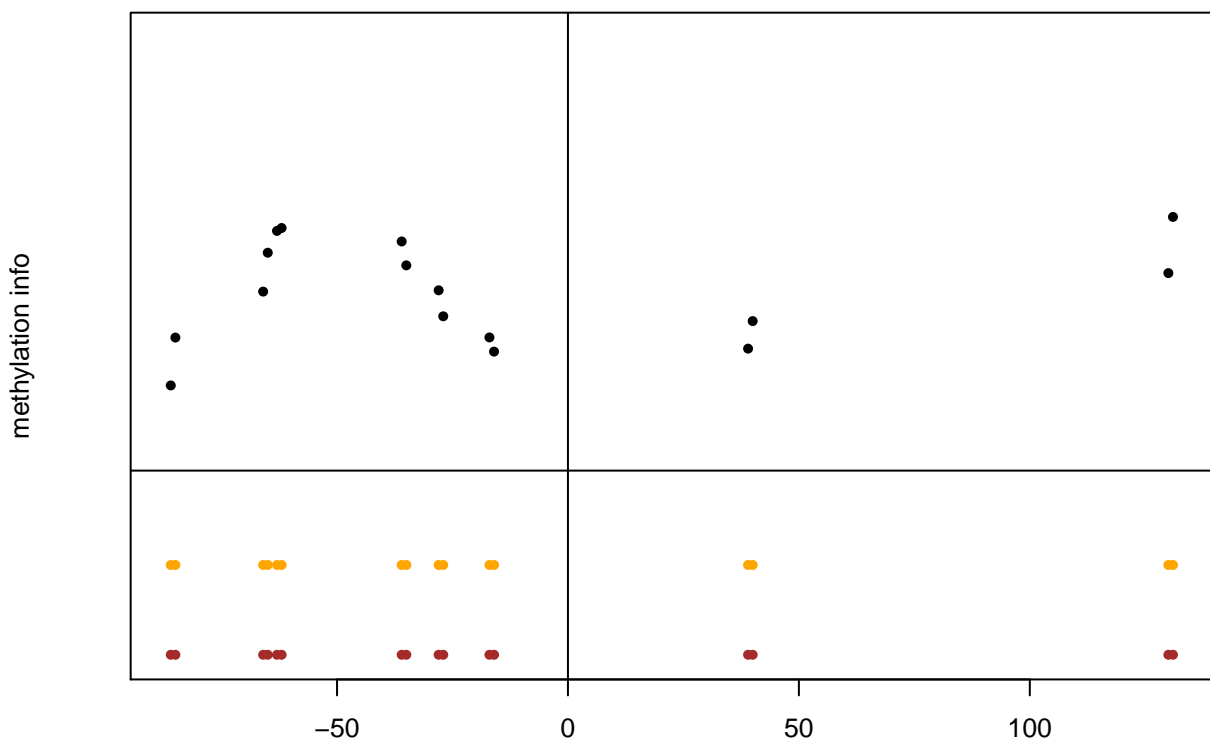

SELENBP1 raw %methylation, red=UC, blue=Normal

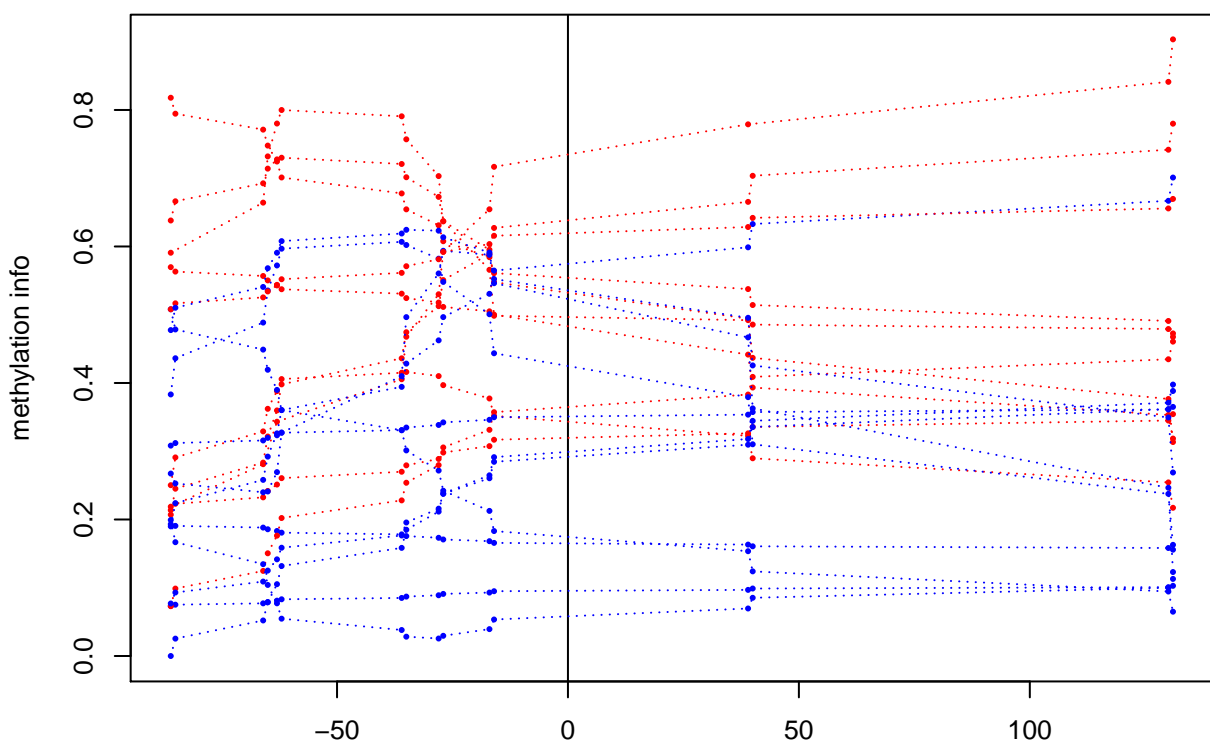

RNAseq logFC(UC-N)= -1.41

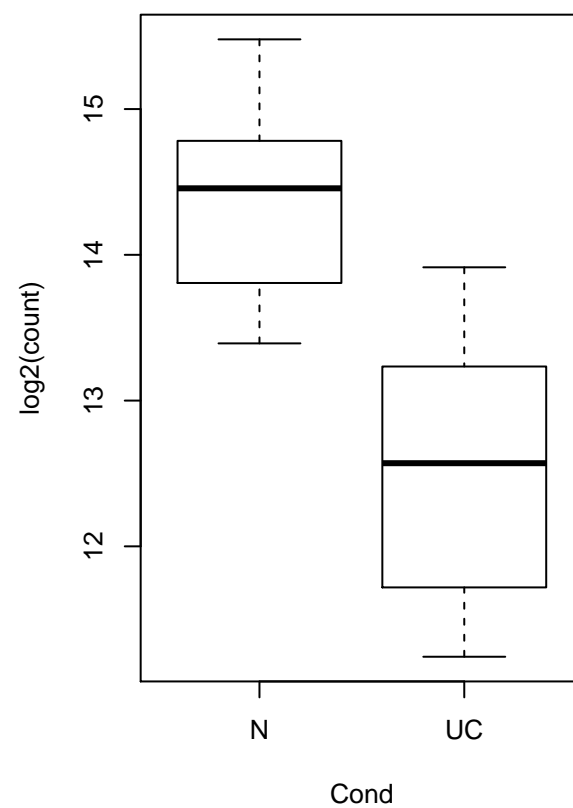

SEMA5A average UC-N %methylation max=22.81% min=-2.48%

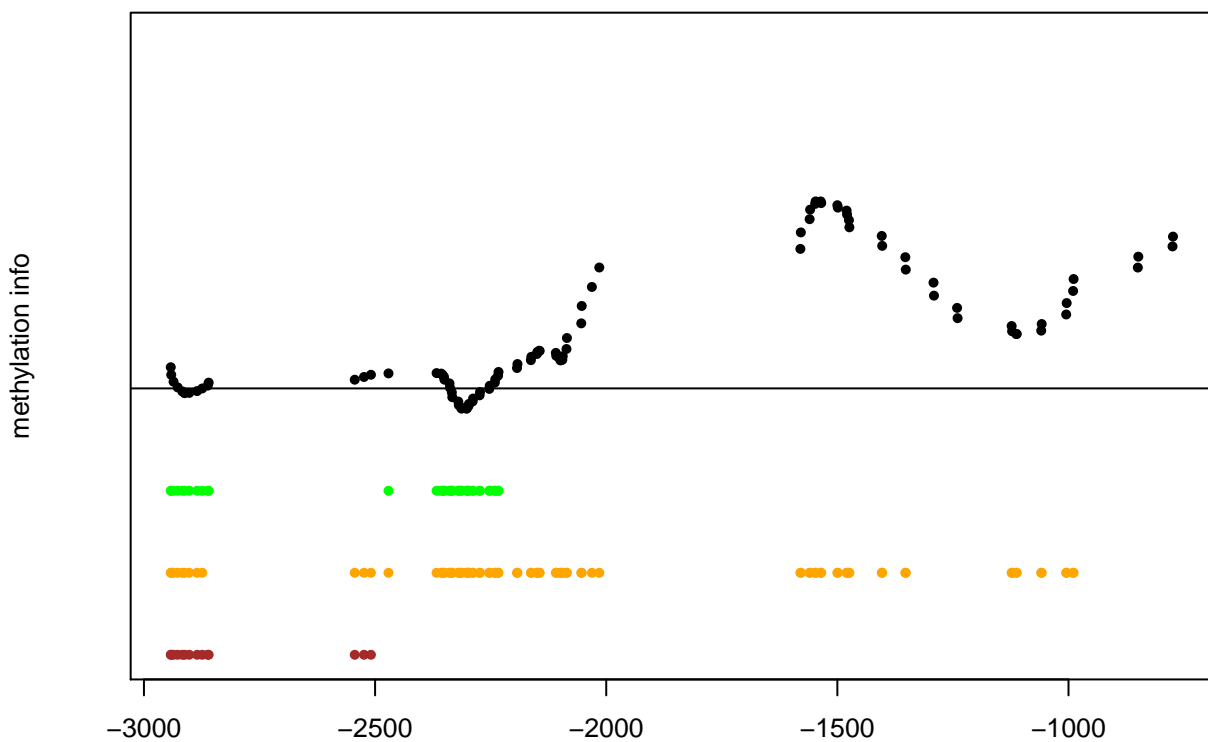

SEMA5A raw %methylation, red=UC, blue=Normal

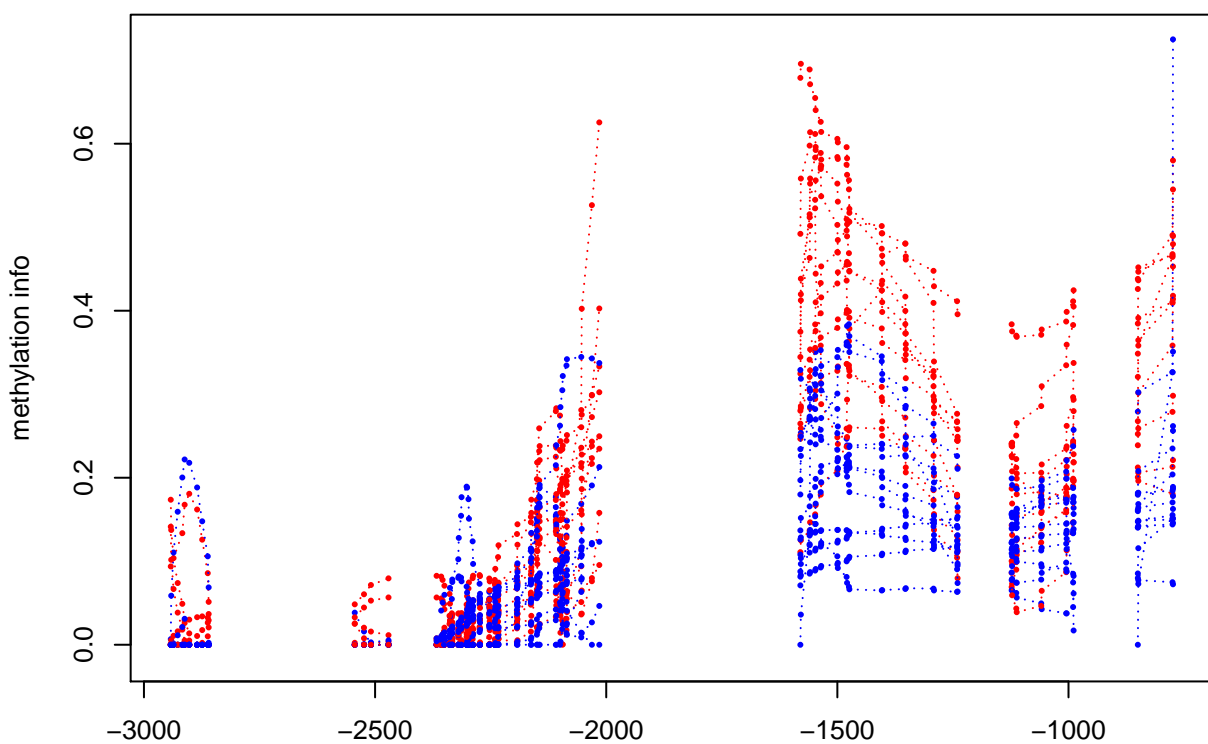

RNAseq logFC(UC-N)= -1.16

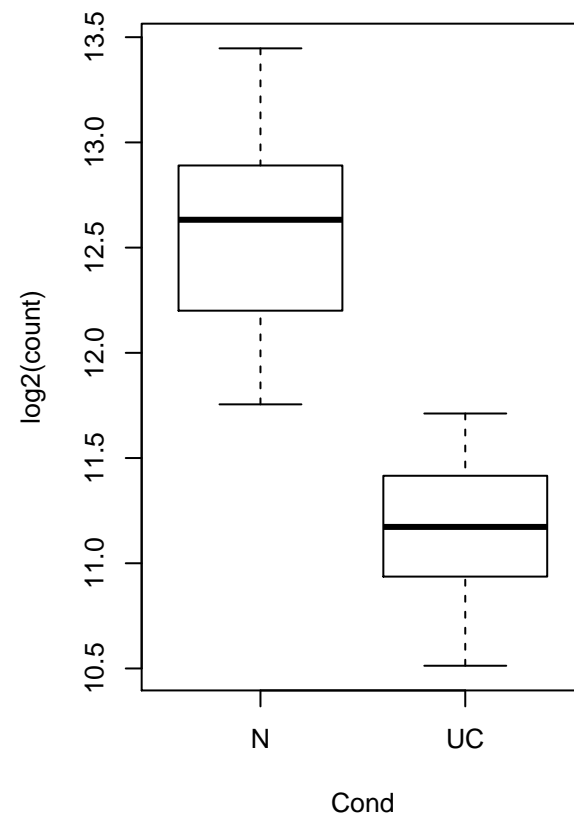



**SEMA7A average UC-N %methylation max=0.74% min=-21.73%**

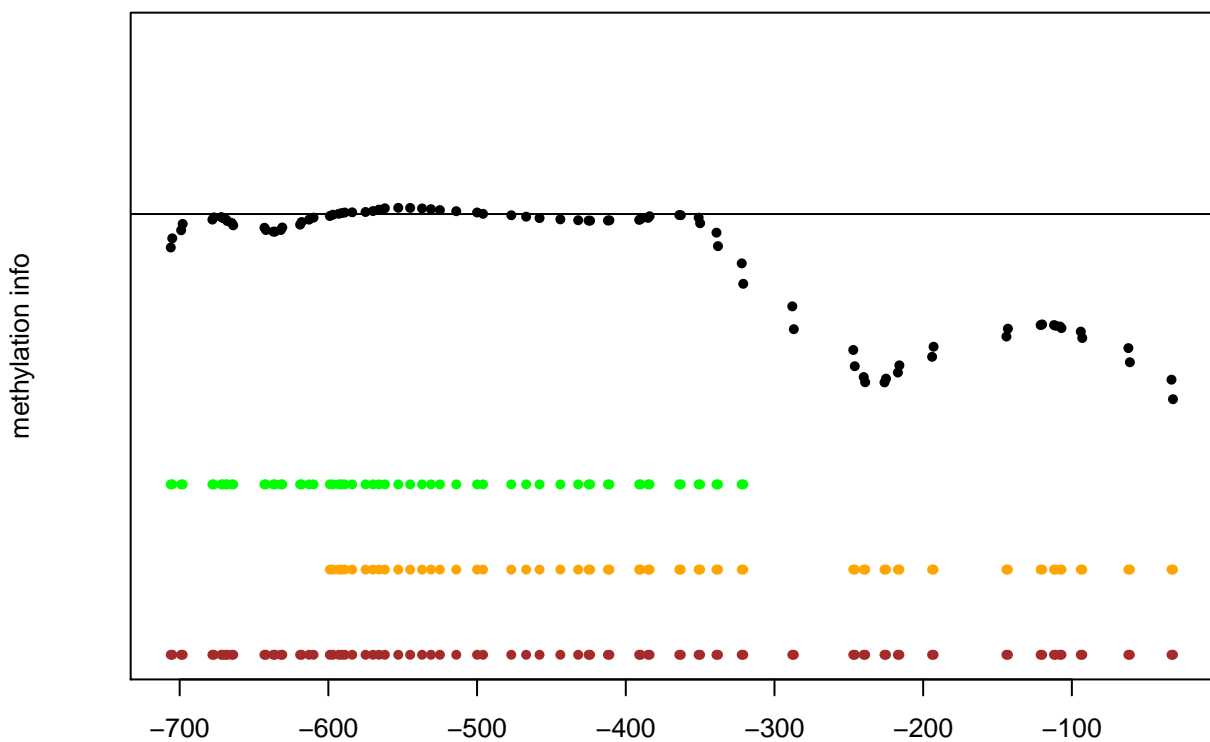

**SEMA7A raw %methylation, red=UC, blue=Normal**

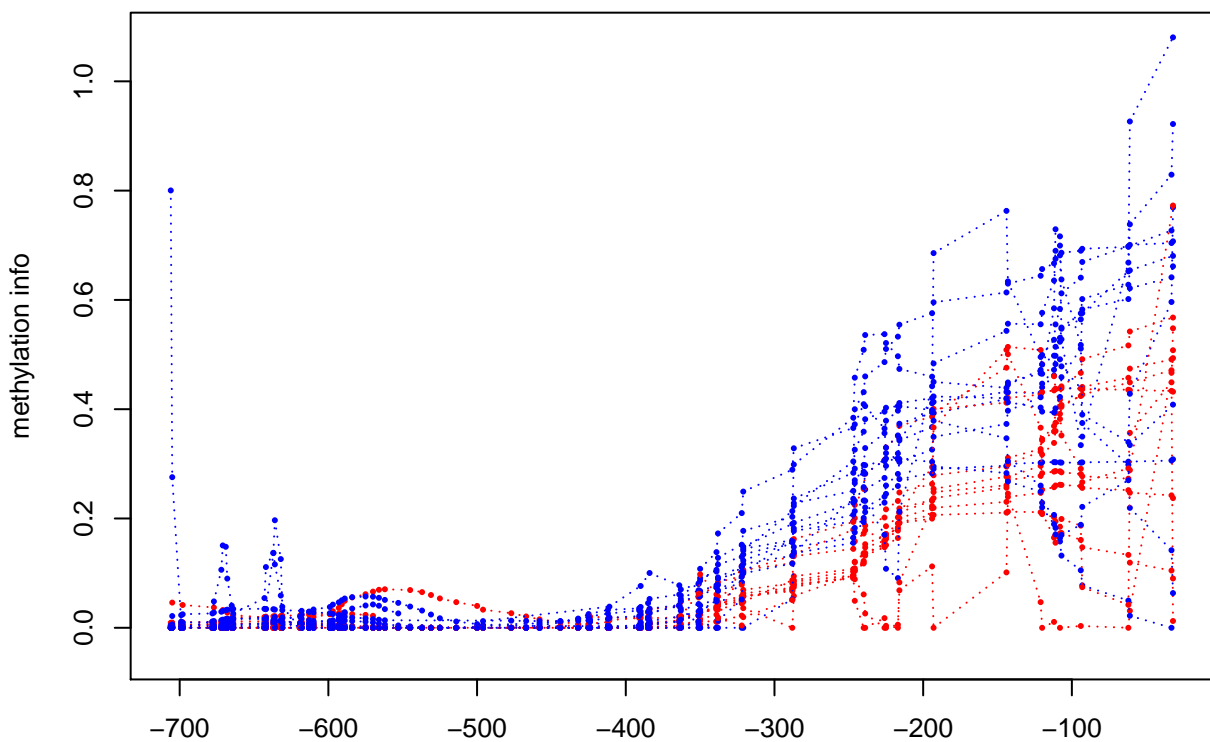

**RNAseq logFC(UC-N)= 2.04**

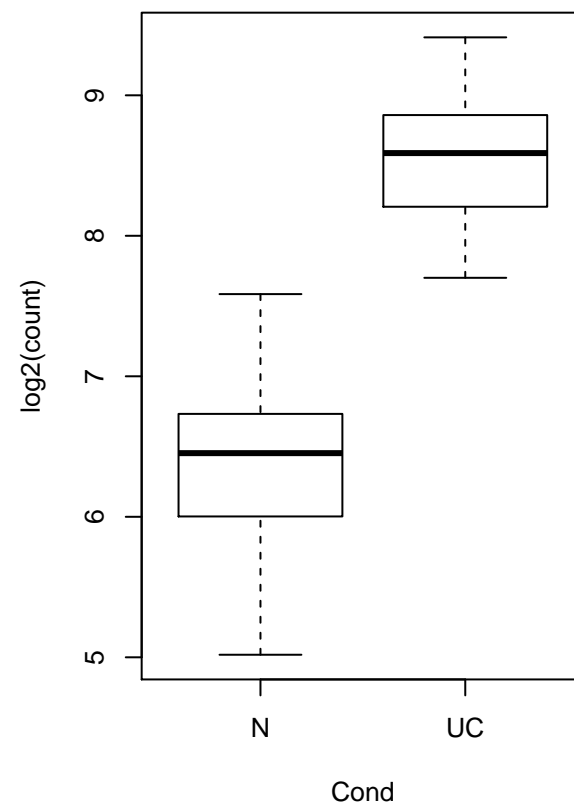

SEPT1 average UC-N %methylation max=-11.54% min=-17.22%

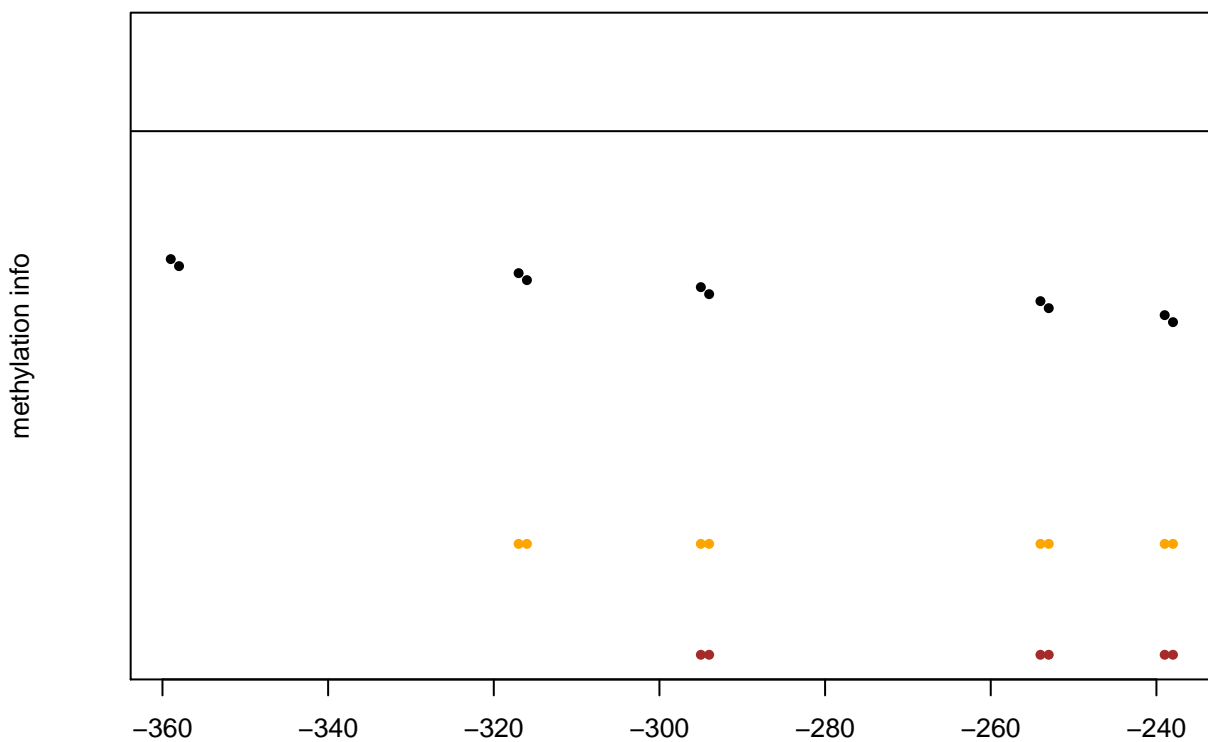

SEPT1 raw %methylation, red=UC, blue=Normal

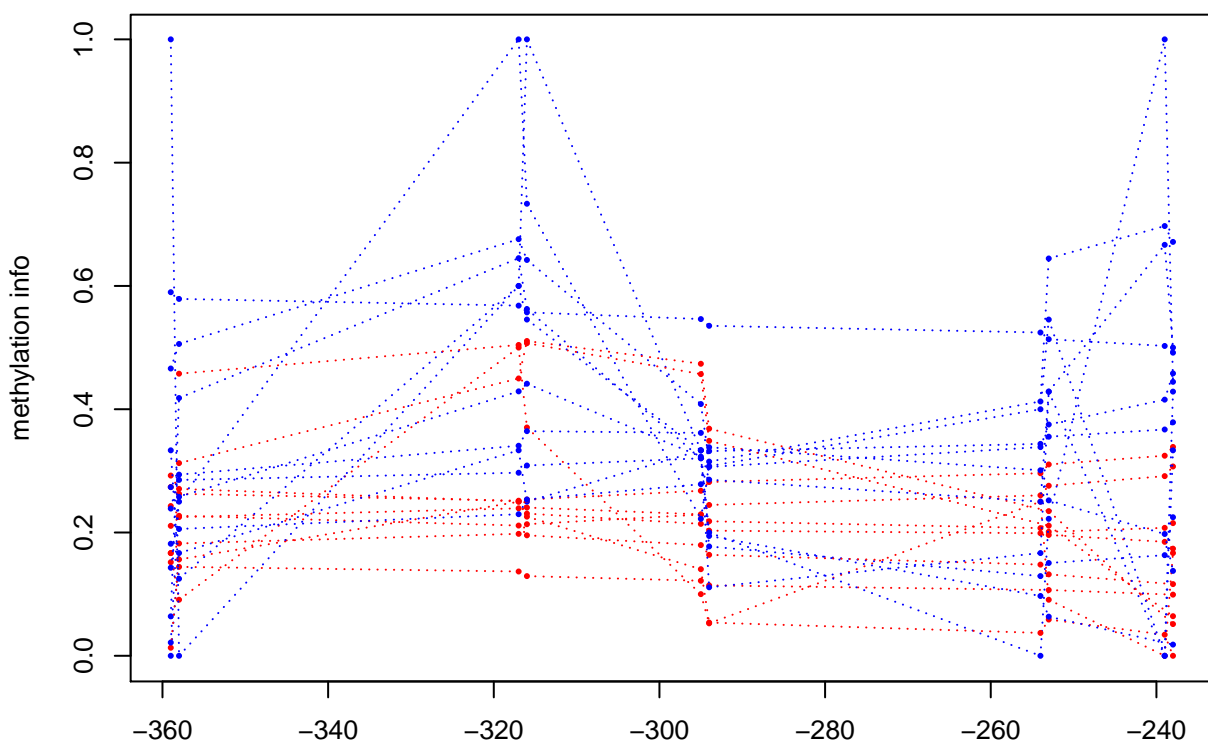

RNAseq logFC(UC-N)= 1.21

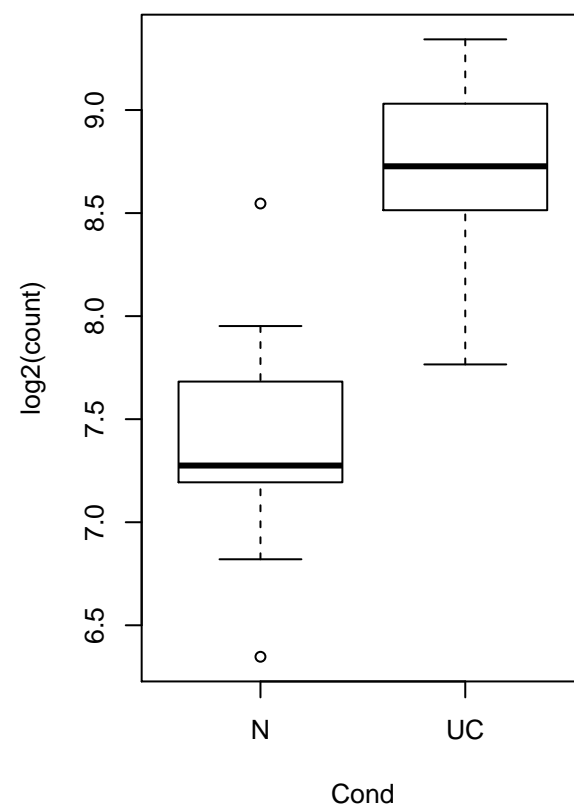

SH2B2 average UC-N %methylation max=0.93% min=-42.92%

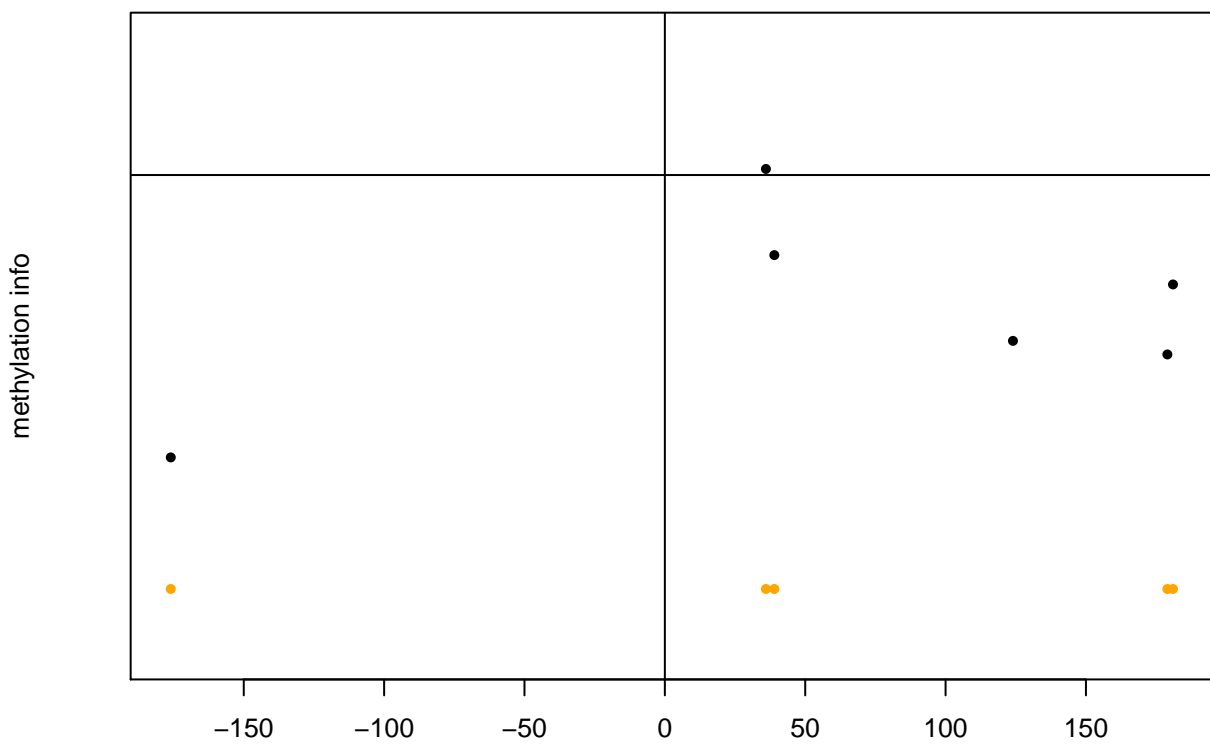

SH2B2 raw %methylation, red=UC, blue=Normal

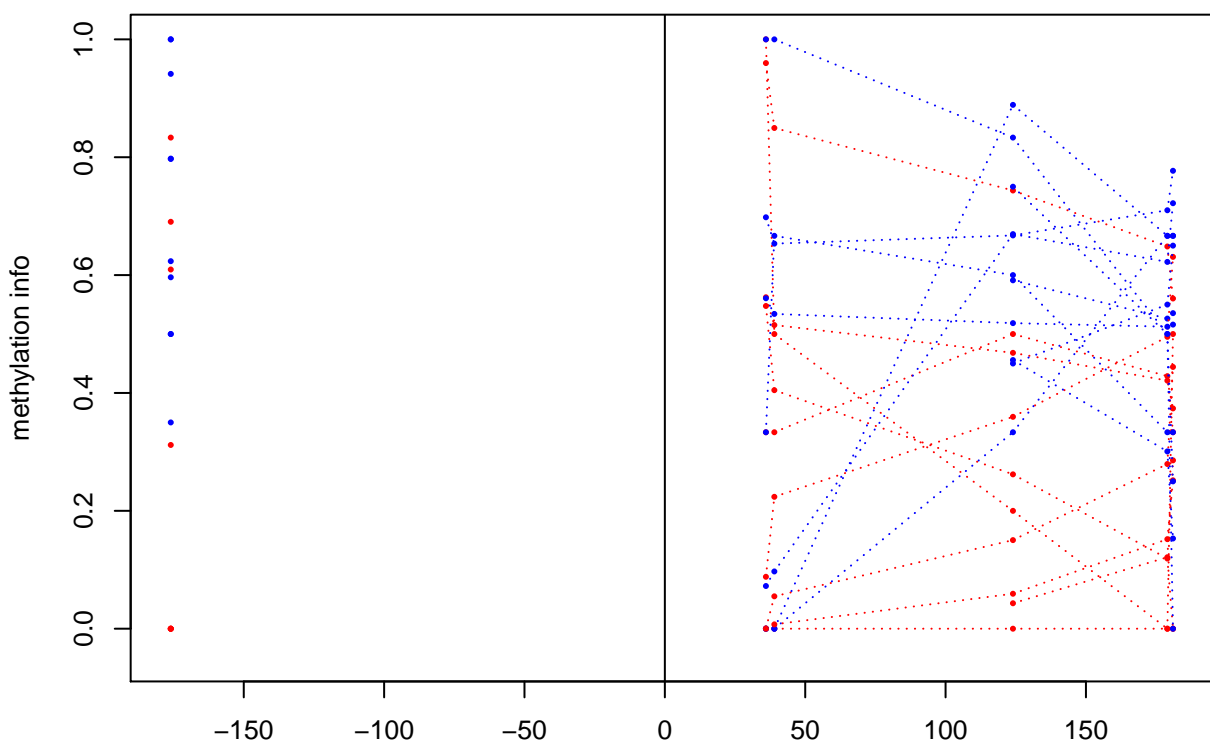

RNAseq logFC(UC-N)= 1.46

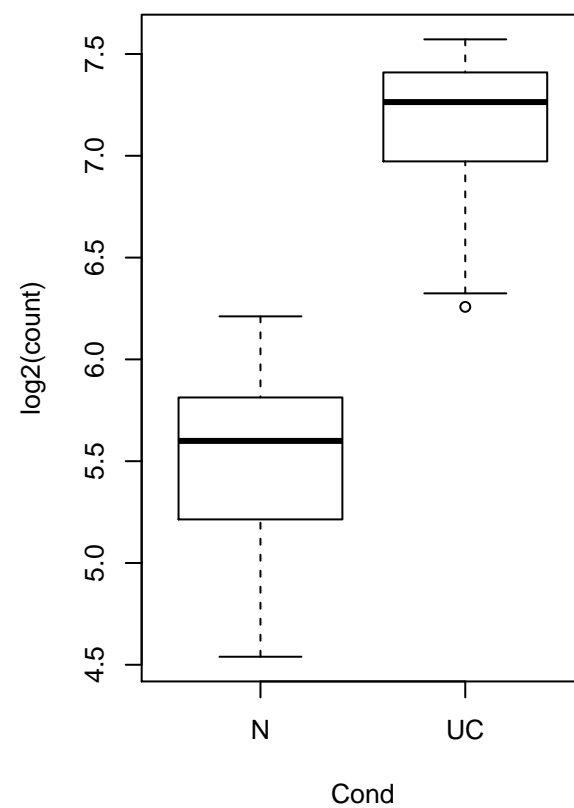

SH2D2A average UC-N %methylation max=5.85% min=-34.77%

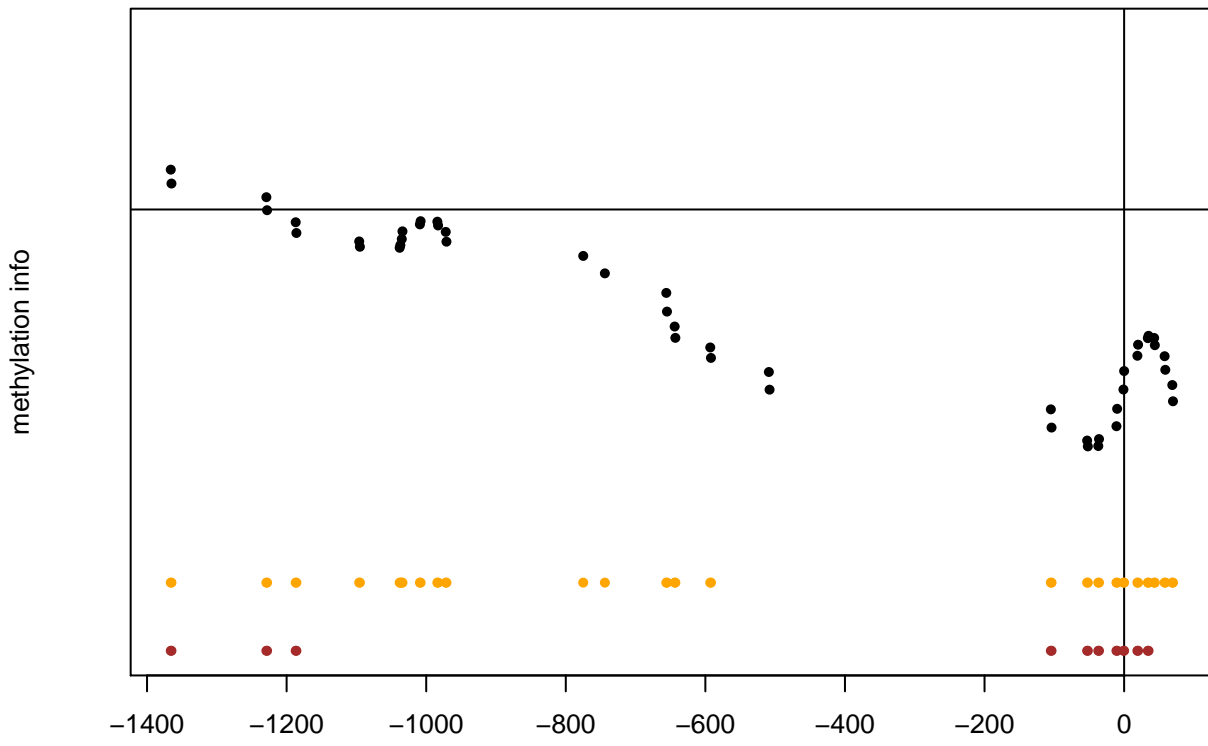

SH2D2A raw %methylation, red=UC, blue=Normal

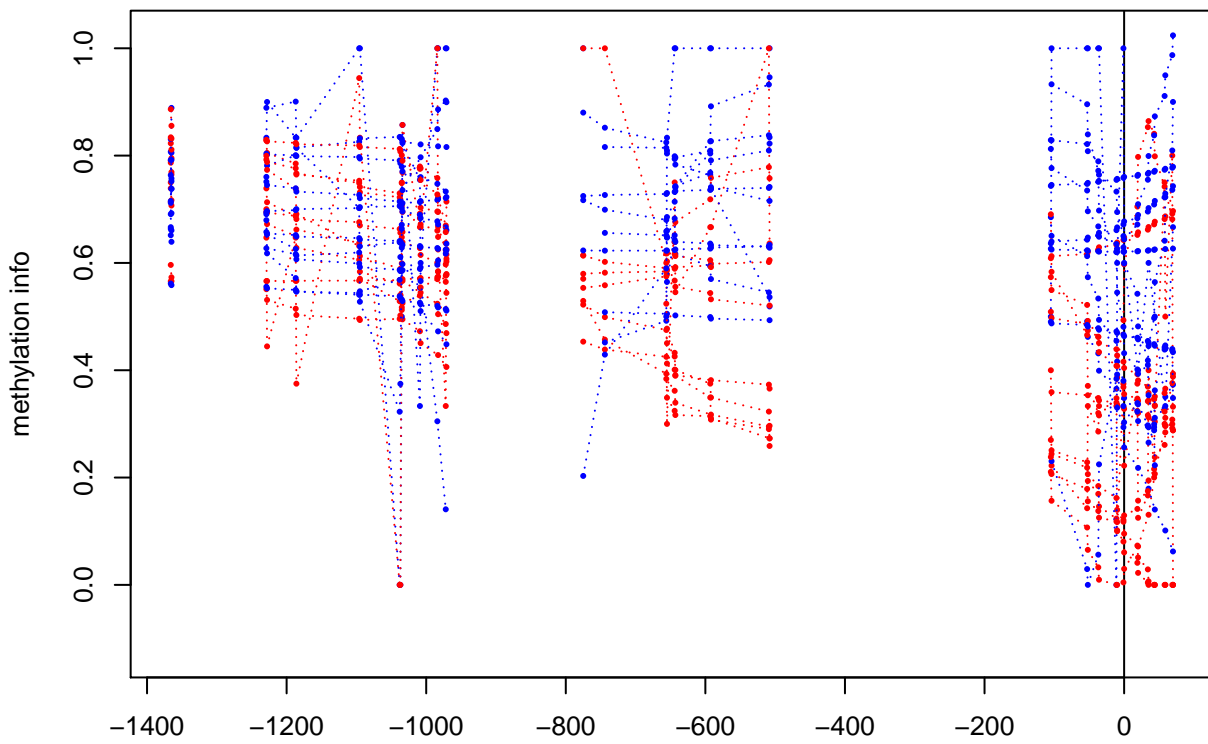

RNAseq logFC(UC-N)= 1.37

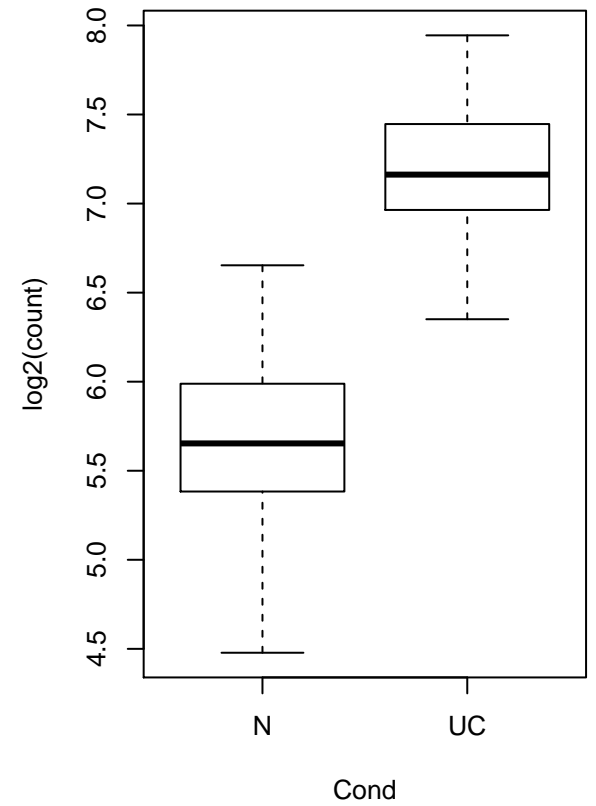

SH2D3C average UC-N %methylation max=-2.68% min=-44.86%

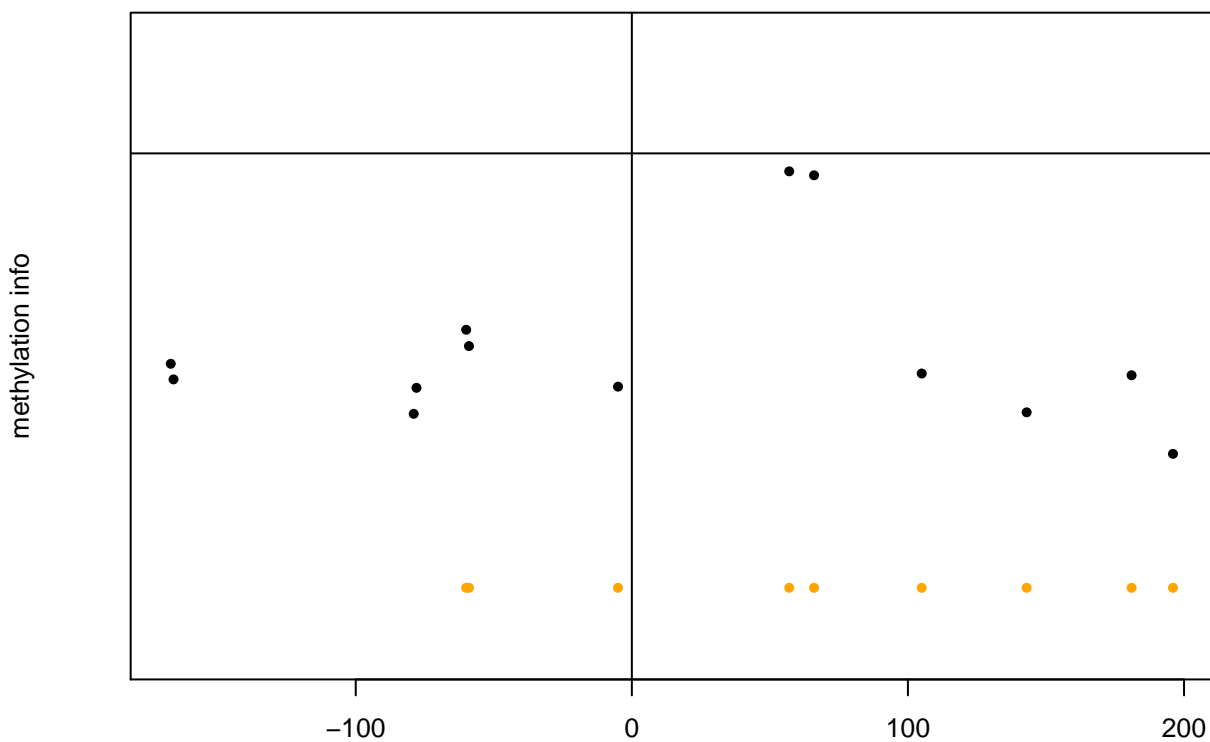

SH2D3C raw %methylation, red=UC, blue=Normal

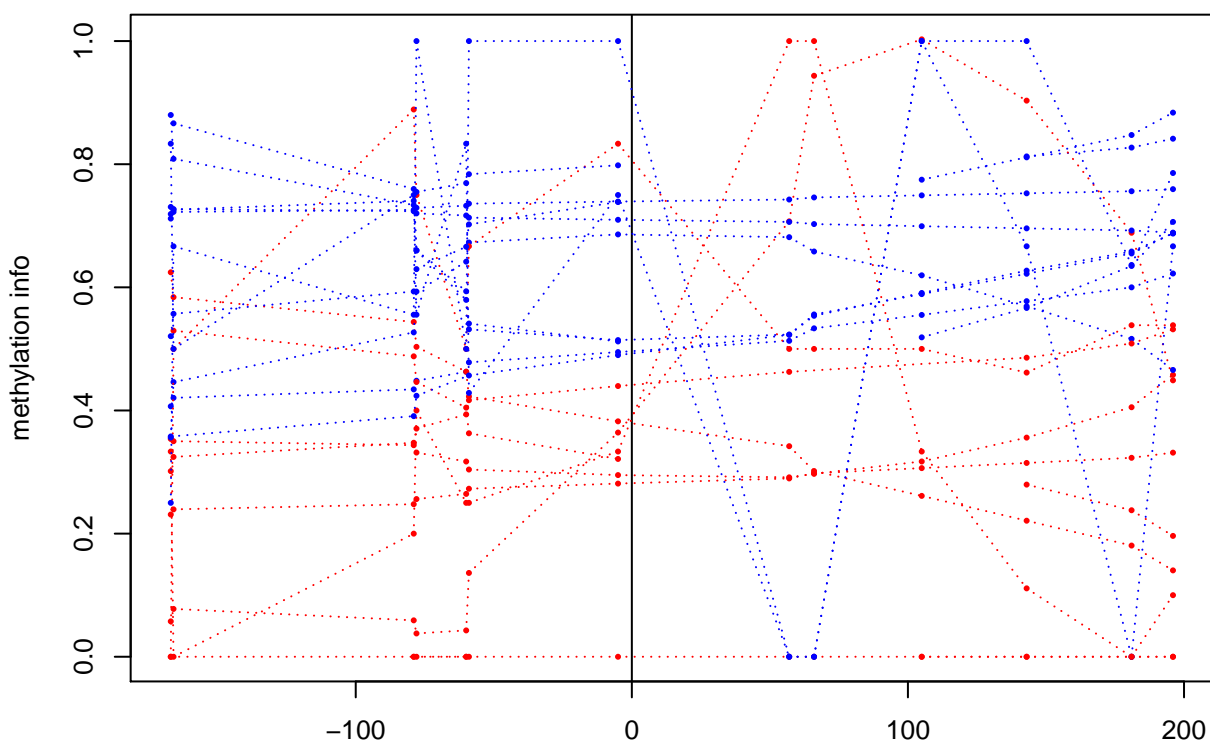

RNAseq logFC(UC-N)= 1.32

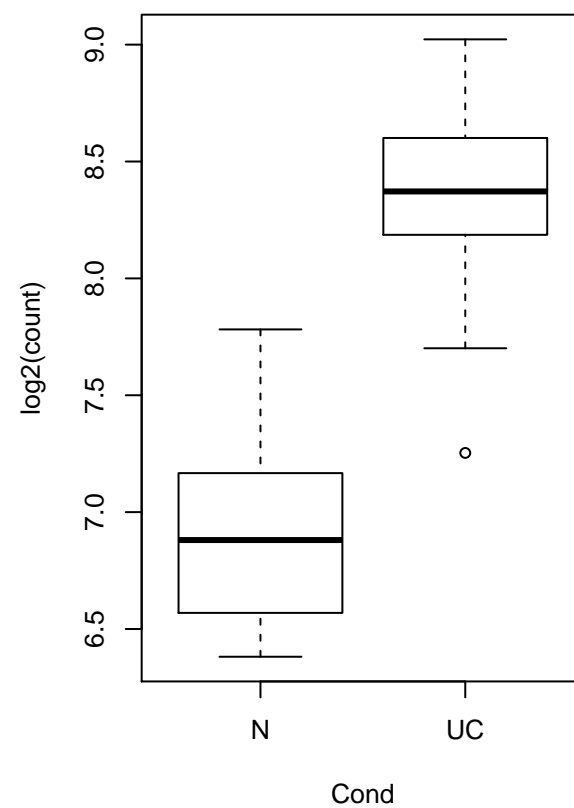

SIRPB1 average UC-N %methylation max=-12.42% min=-32.65%

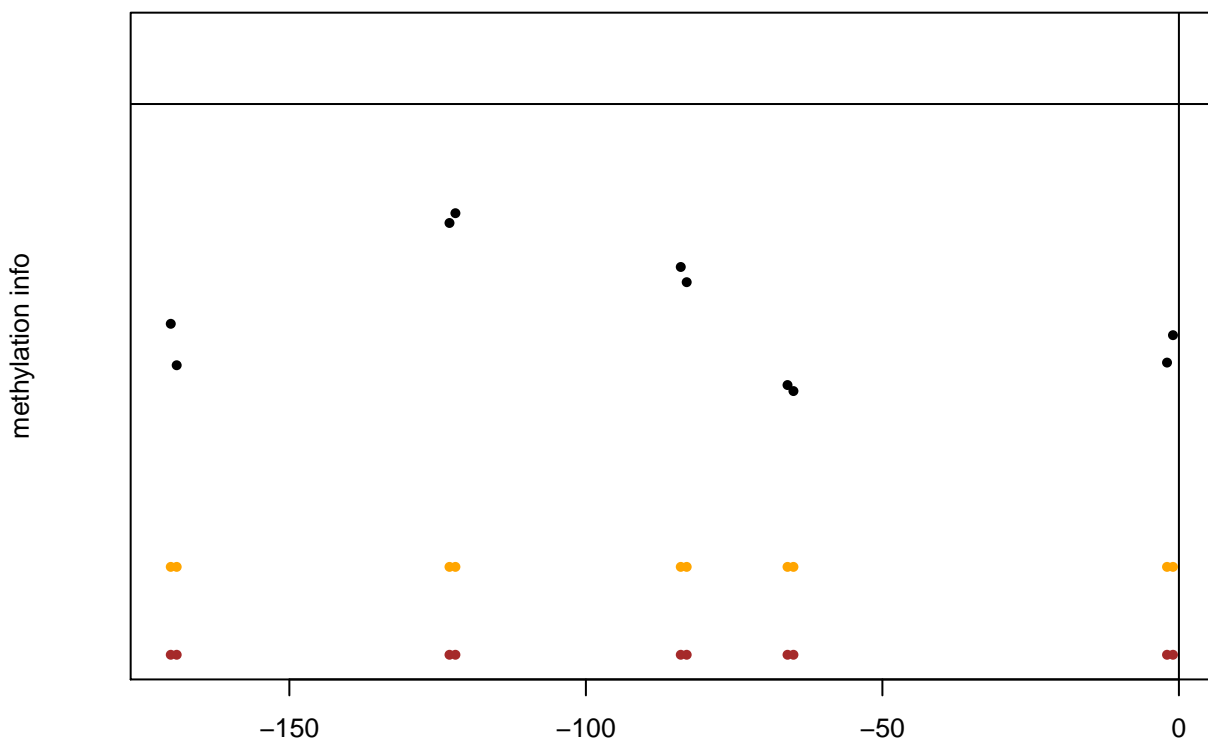

SIRPB1 raw %methylation, red=UC, blue=Normal

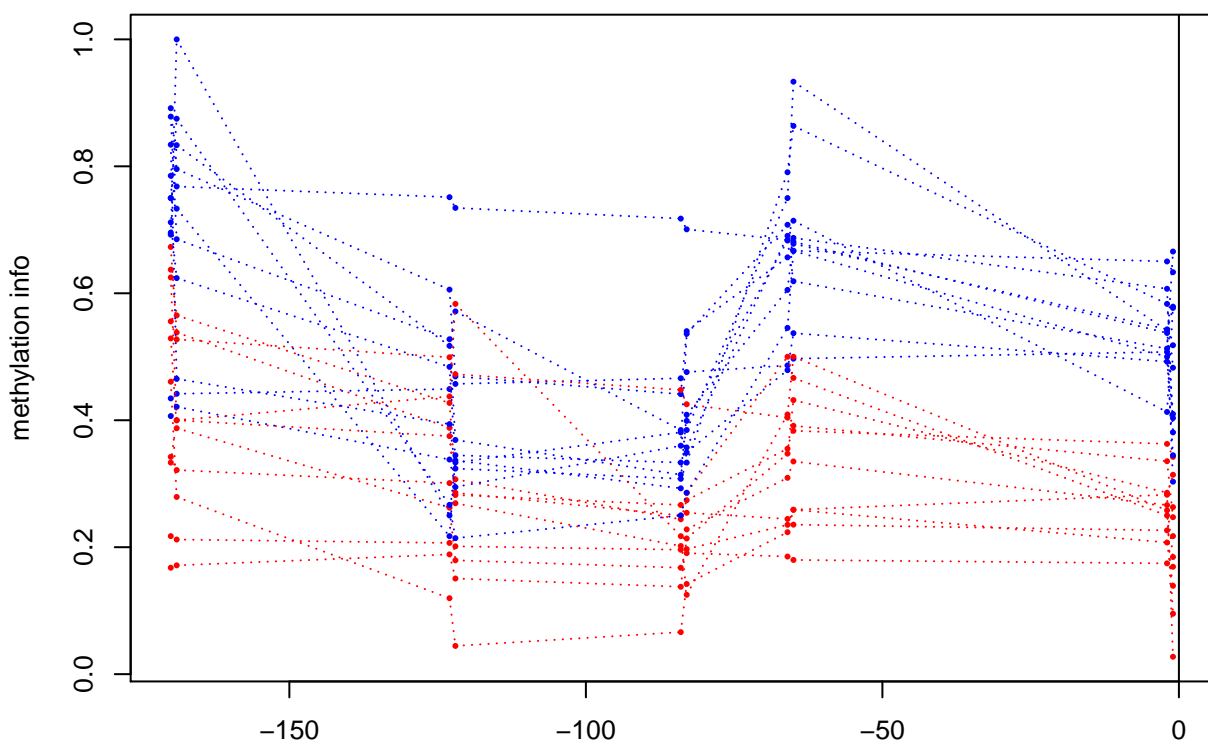

RNAseq logFC(UC-N)= 1.91

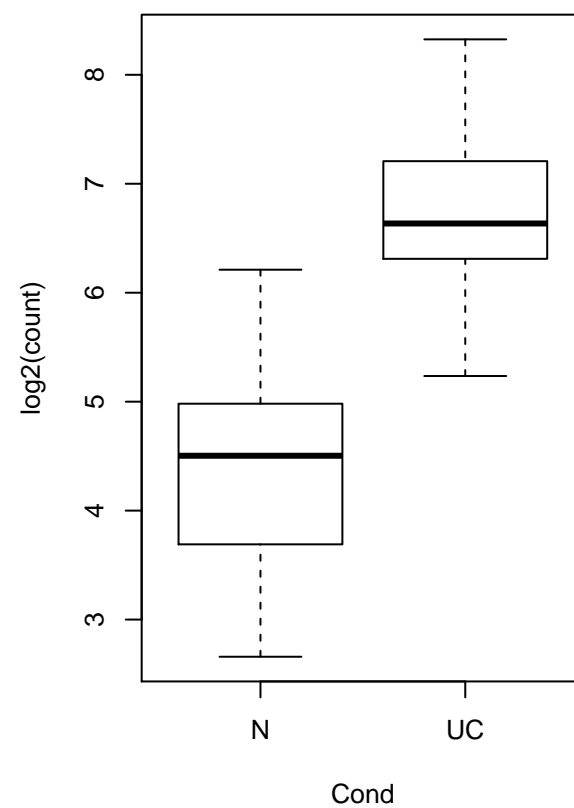

SIRPB2 average UC-N %methylation max=-17.79% min=-32.13%

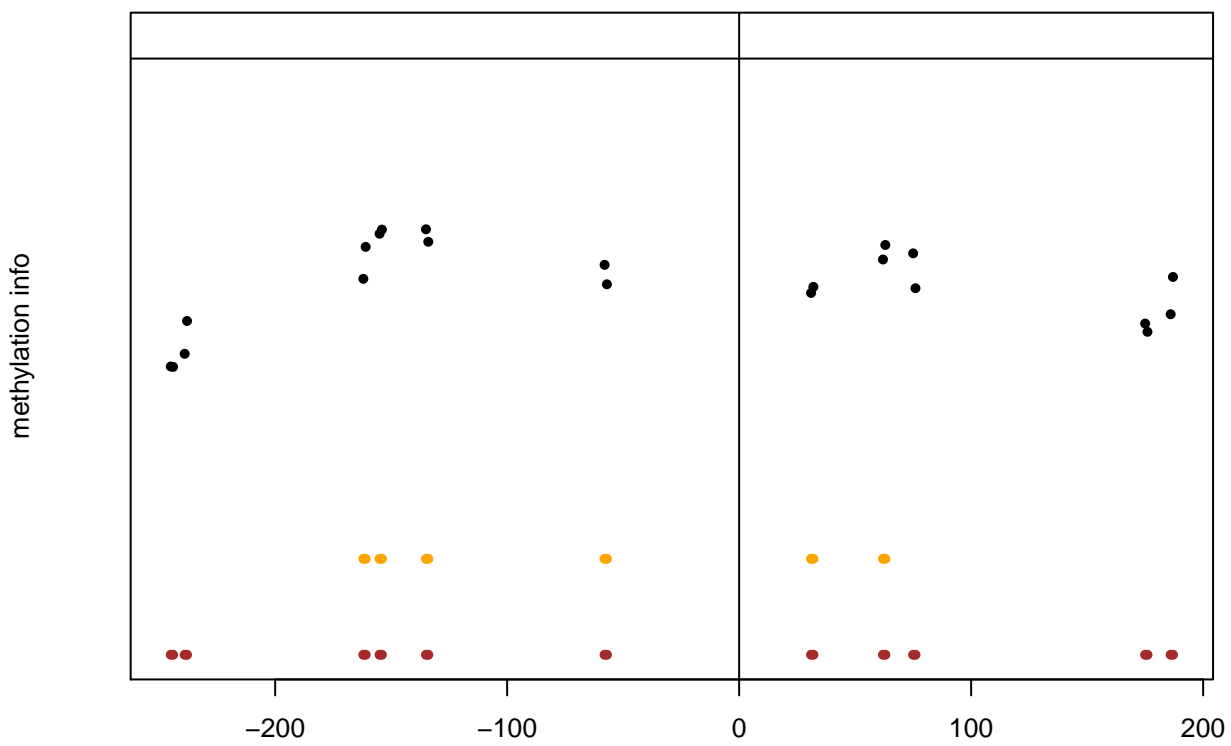

SIRPB2 raw %methylation, red=UC, blue=Normal

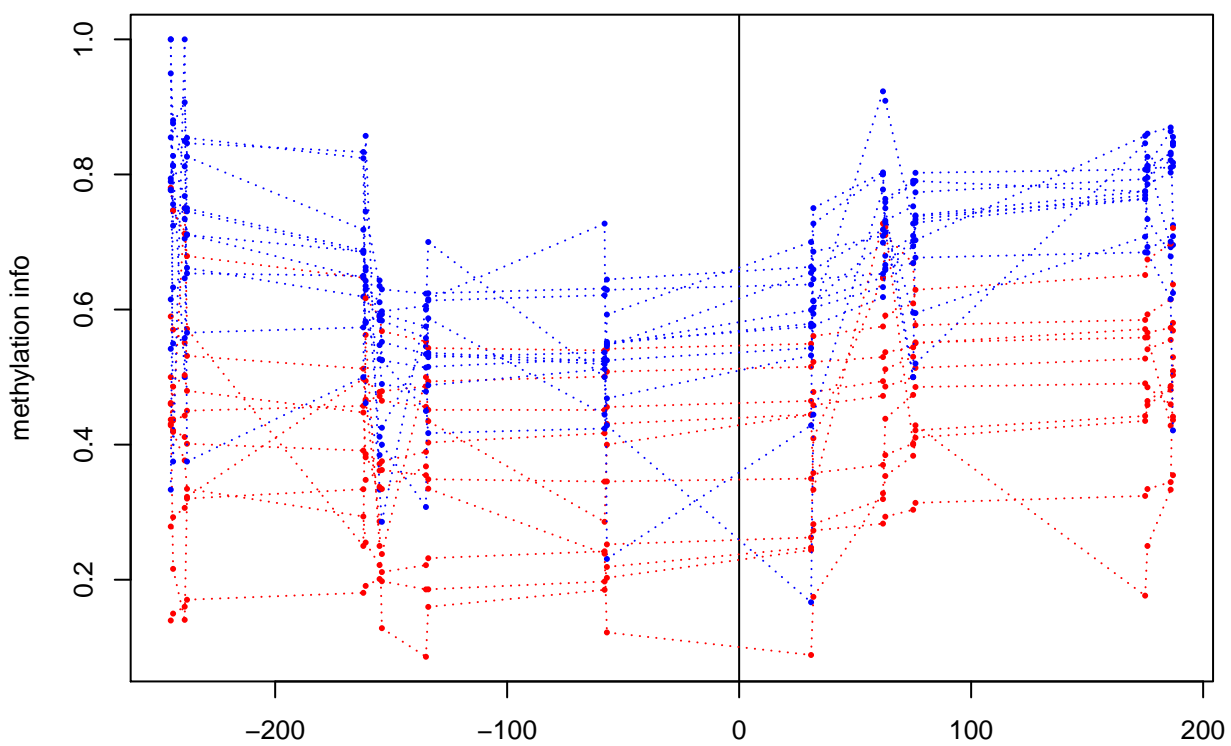

RNAseq logFC(UC-N)= 1.12

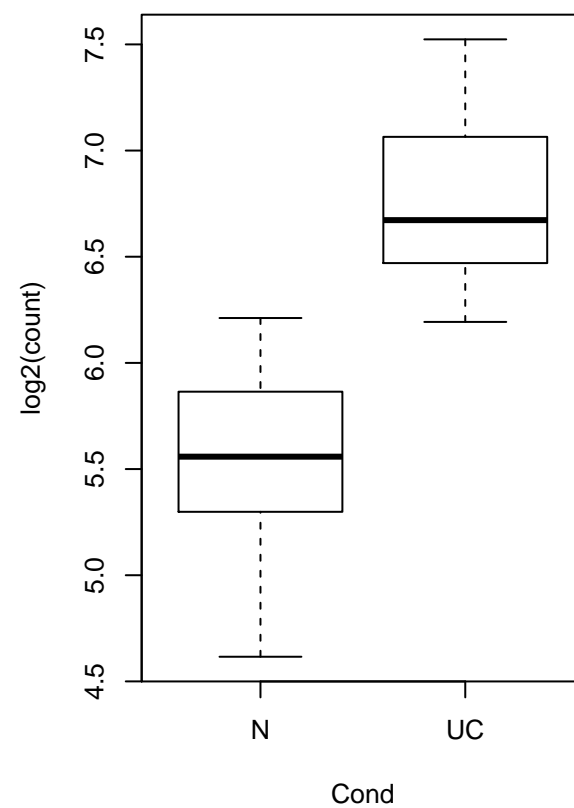

SLAMF1 average UC-N %methylation max=0% min=-36.55%

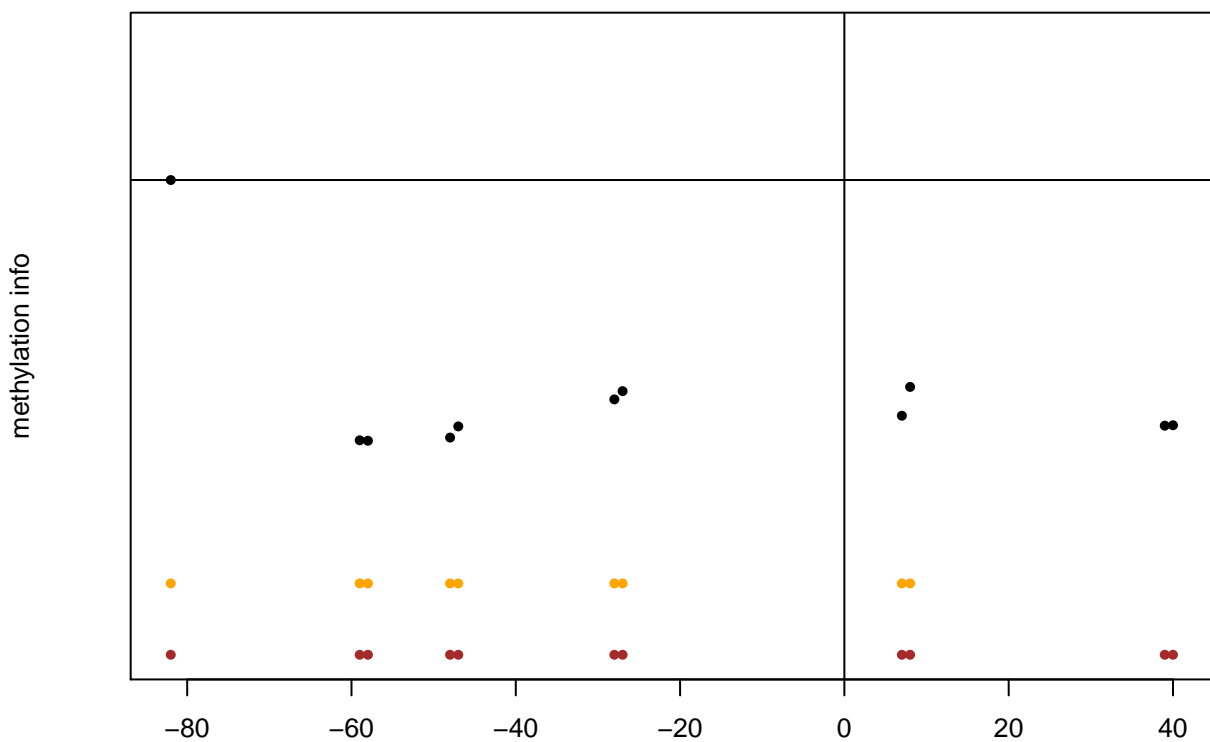

SLAMF1 raw %methylation, red=UC, blue=Normal

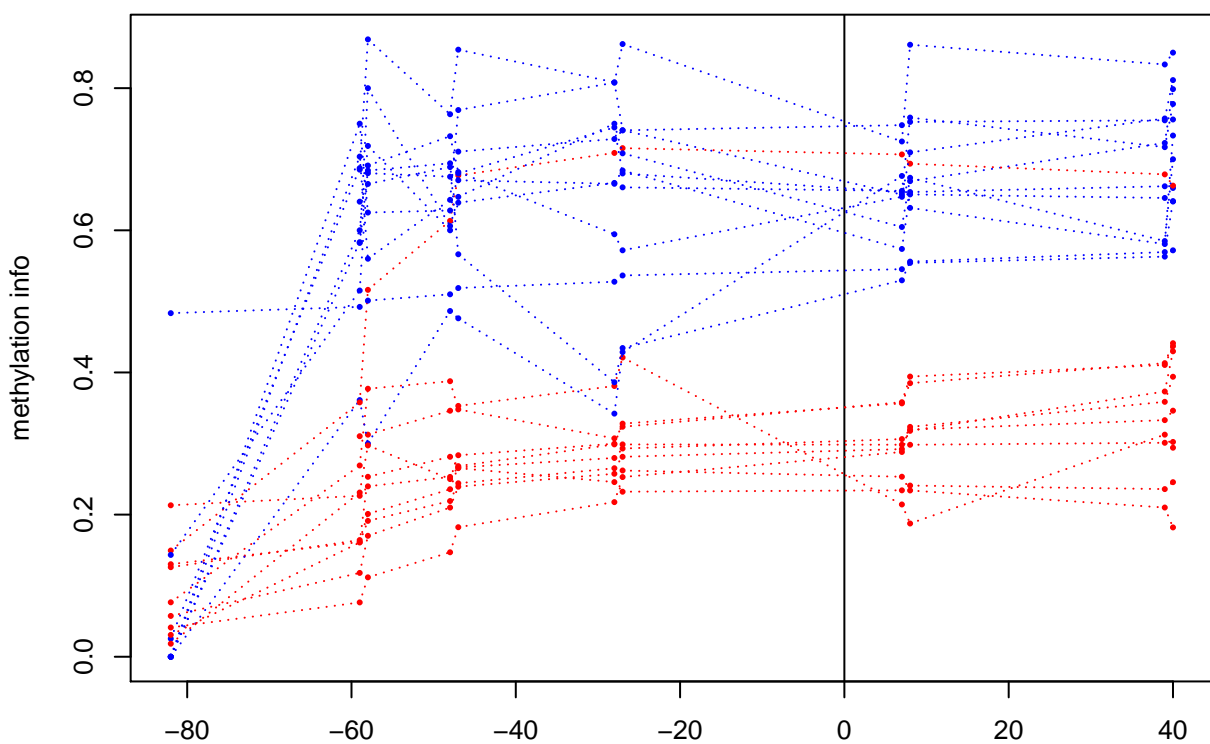

RNAseq logFC(UC-N)= 1.34

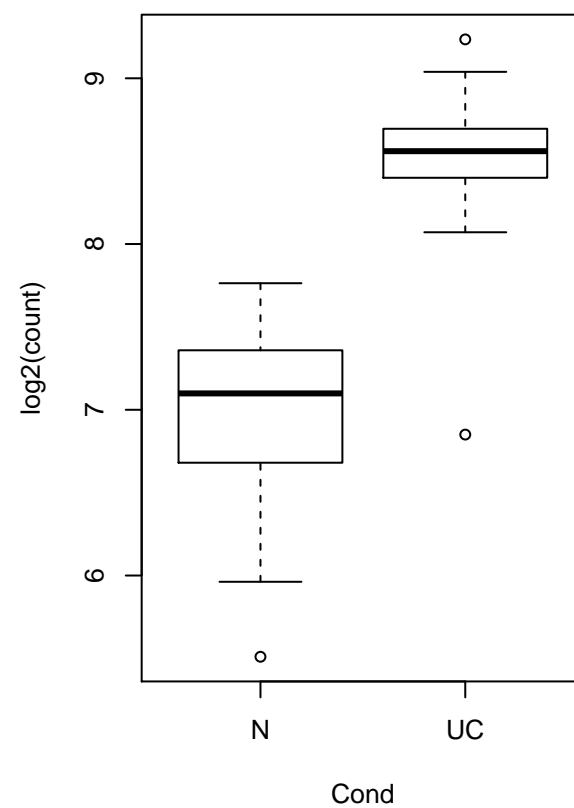



SLAMF6 average UC-N %methylation max=-9.36% min=-13.01%

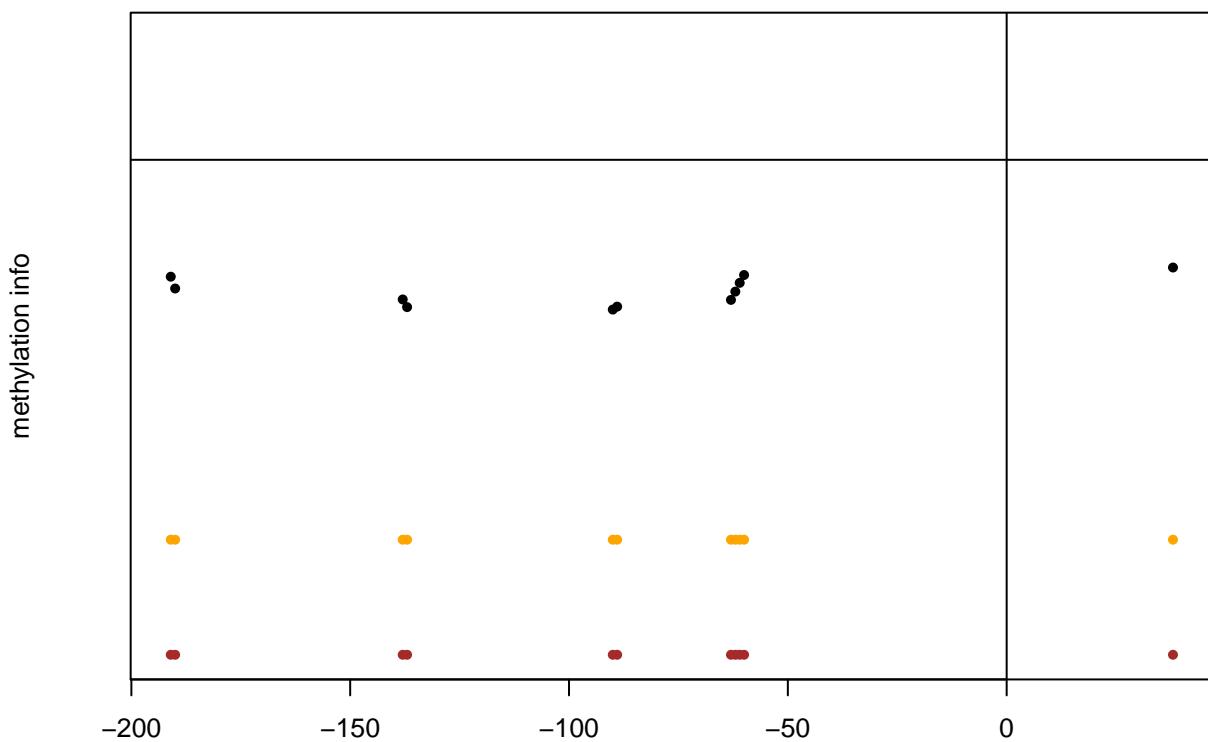

SLAMF6 raw %methylation, red=UC, blue=Normal

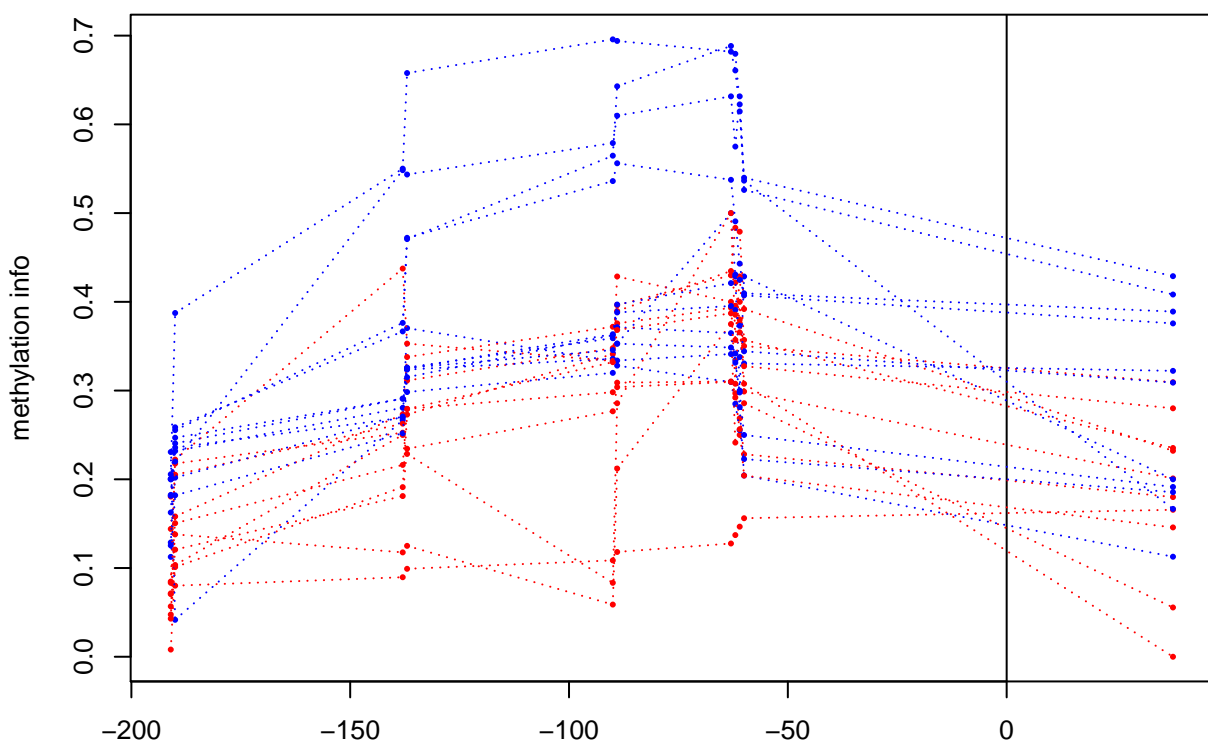

RNAseq logFC(UC-N)= 1.72

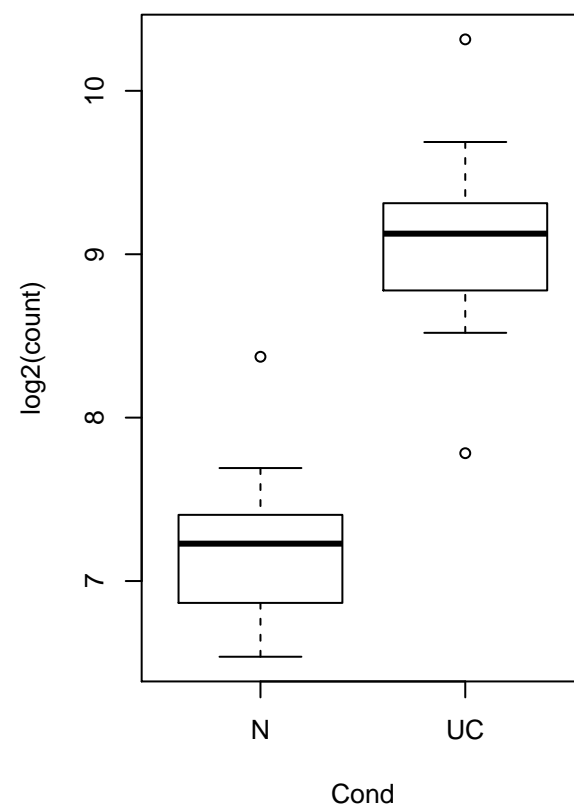

SLAMF7 average UC-N %methylation max=14.44% min=-35.88%

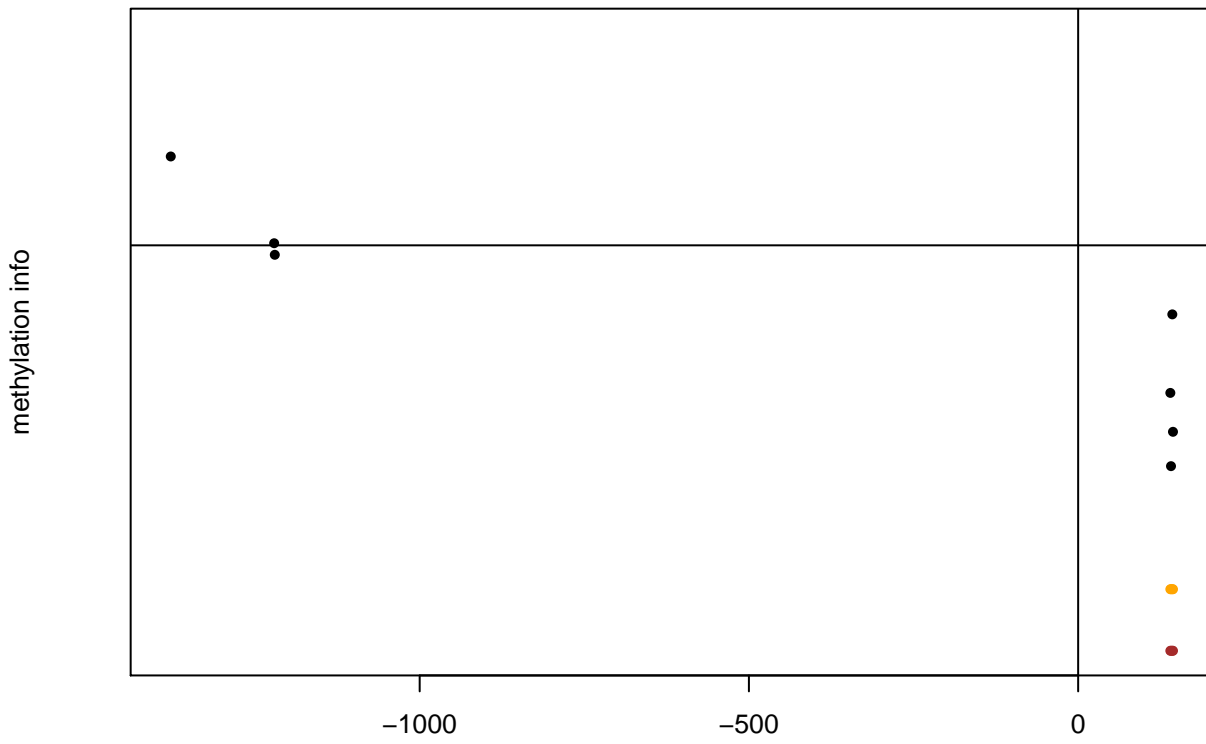

SLAMF7 raw %methylation, red=UC, blue=Normal

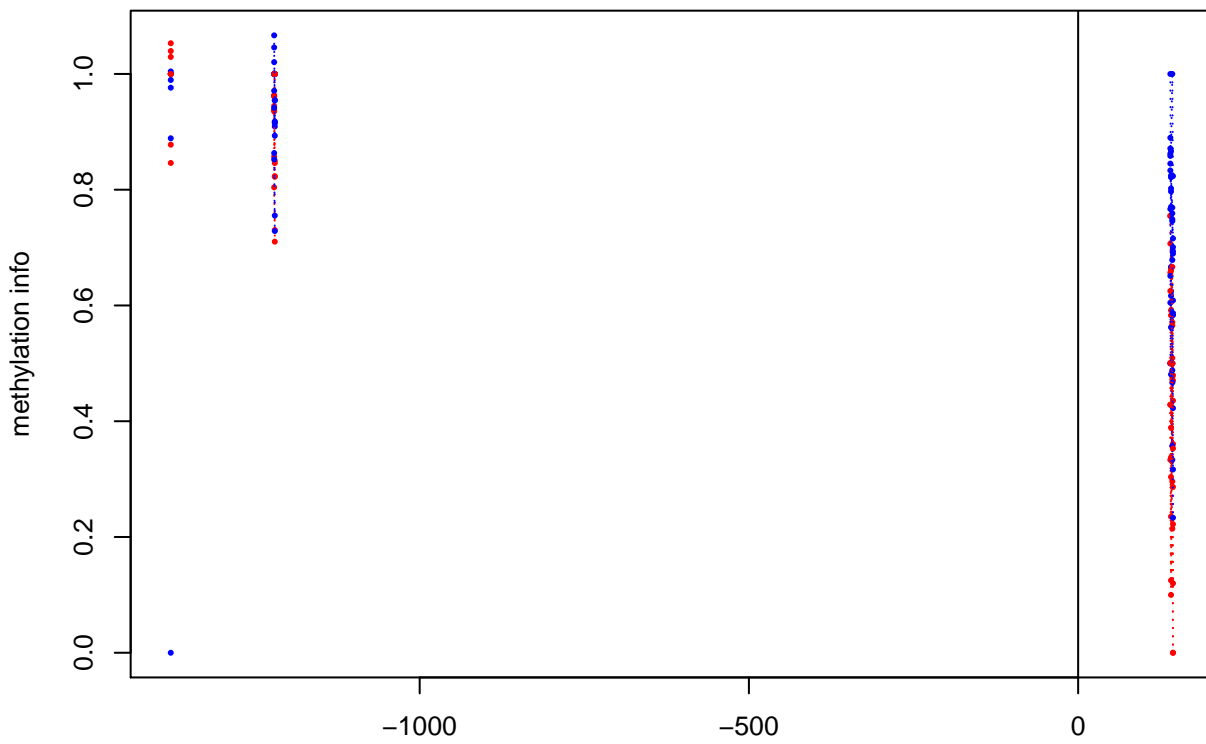

RNAseq logFC(UC-N)= 1.04

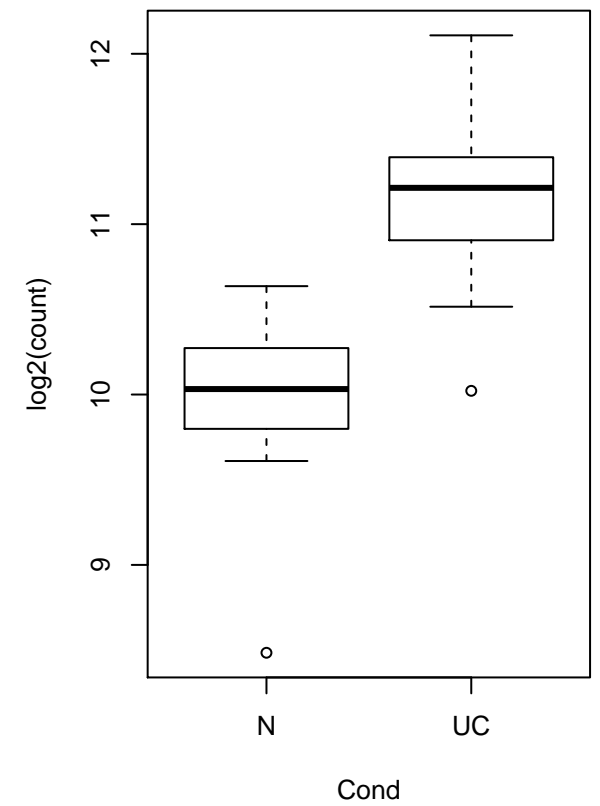

SLC11A1 average UC-N %methylation max=-24.14% min=-30.06%

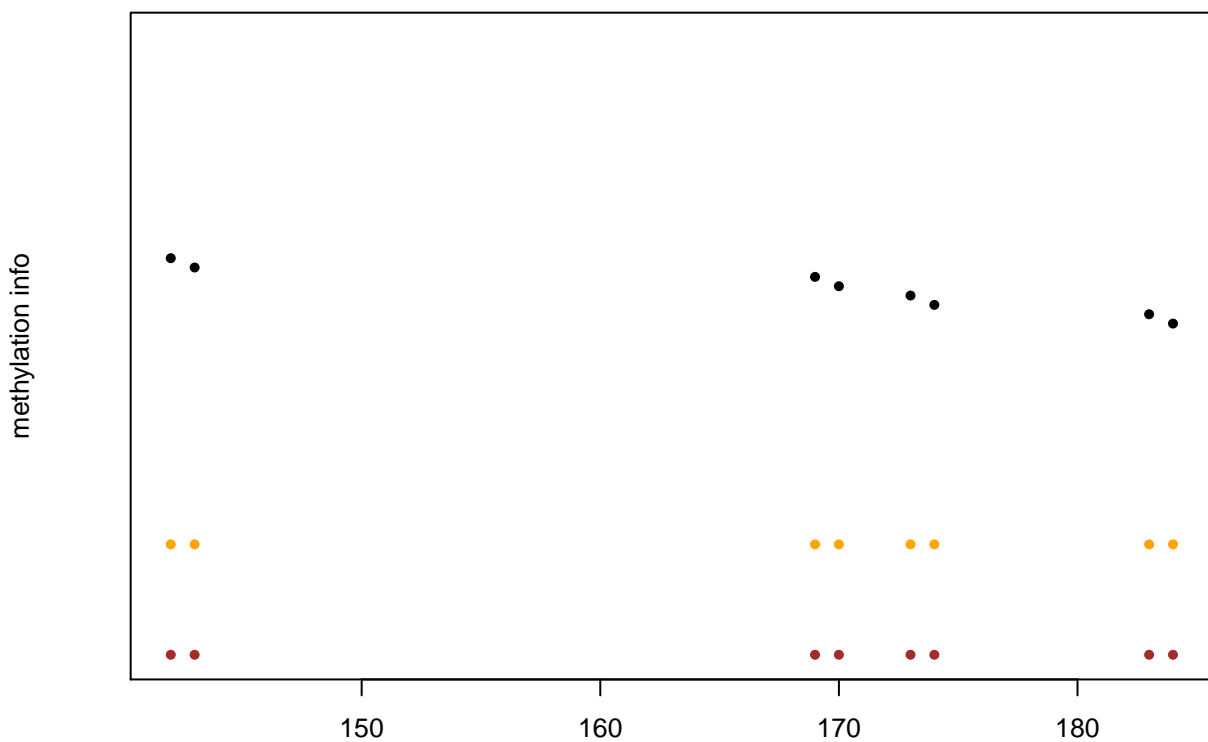

SLC11A1 raw %methylation, red=UC, blue=Normal

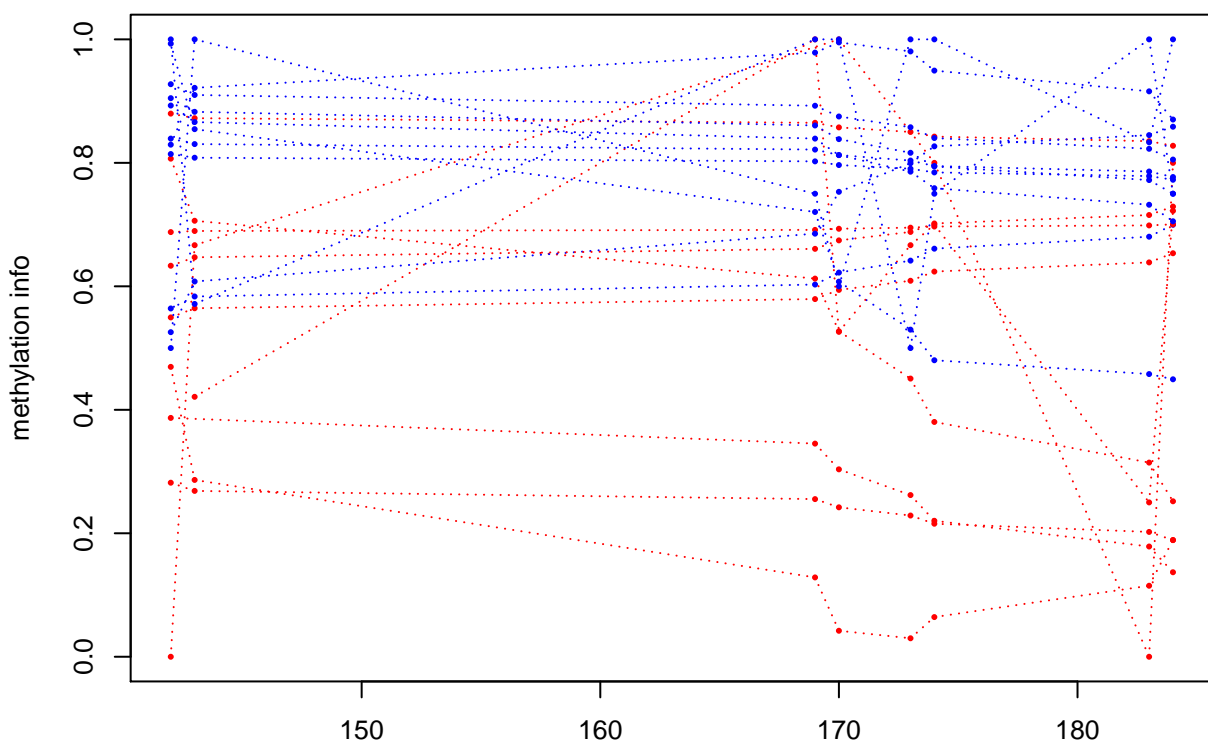

RNAseq logFC(UC-N)= 1.79

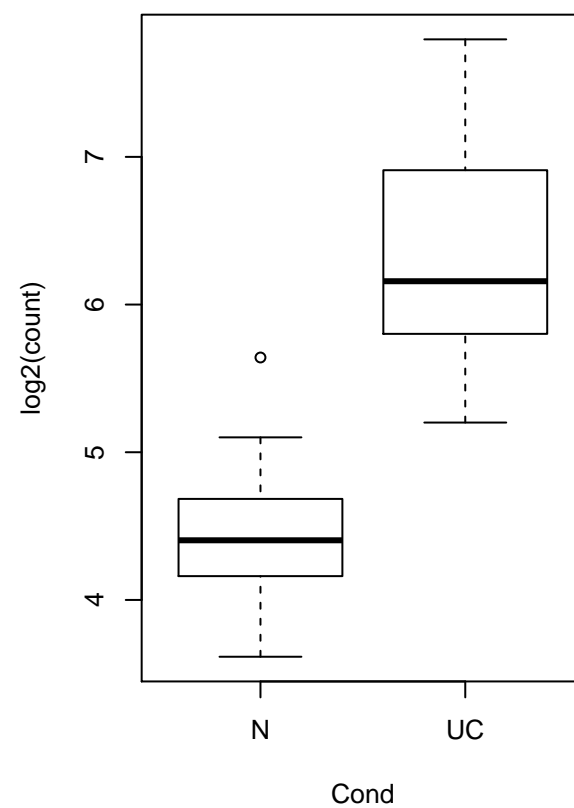

SLC17A8 average UC-N %methylation max=11.95% min=-14.42%

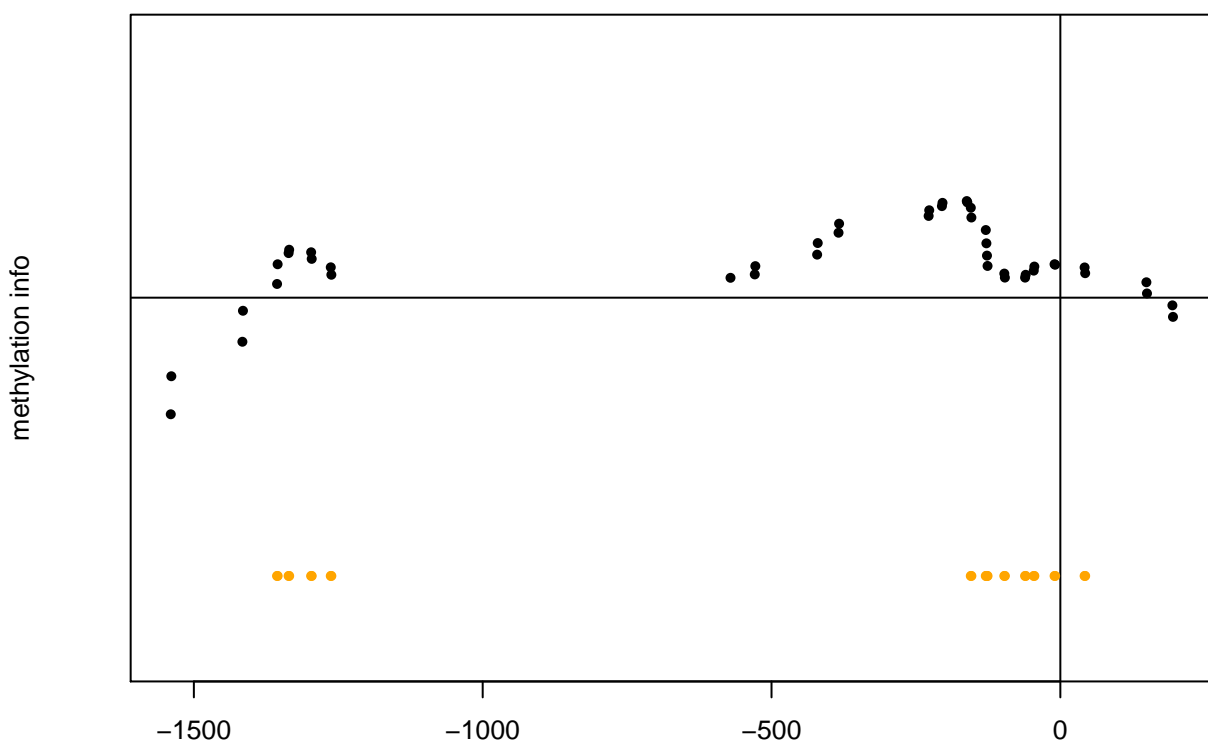

SLC17A8 raw %methylation, red=UC, blue=Normal

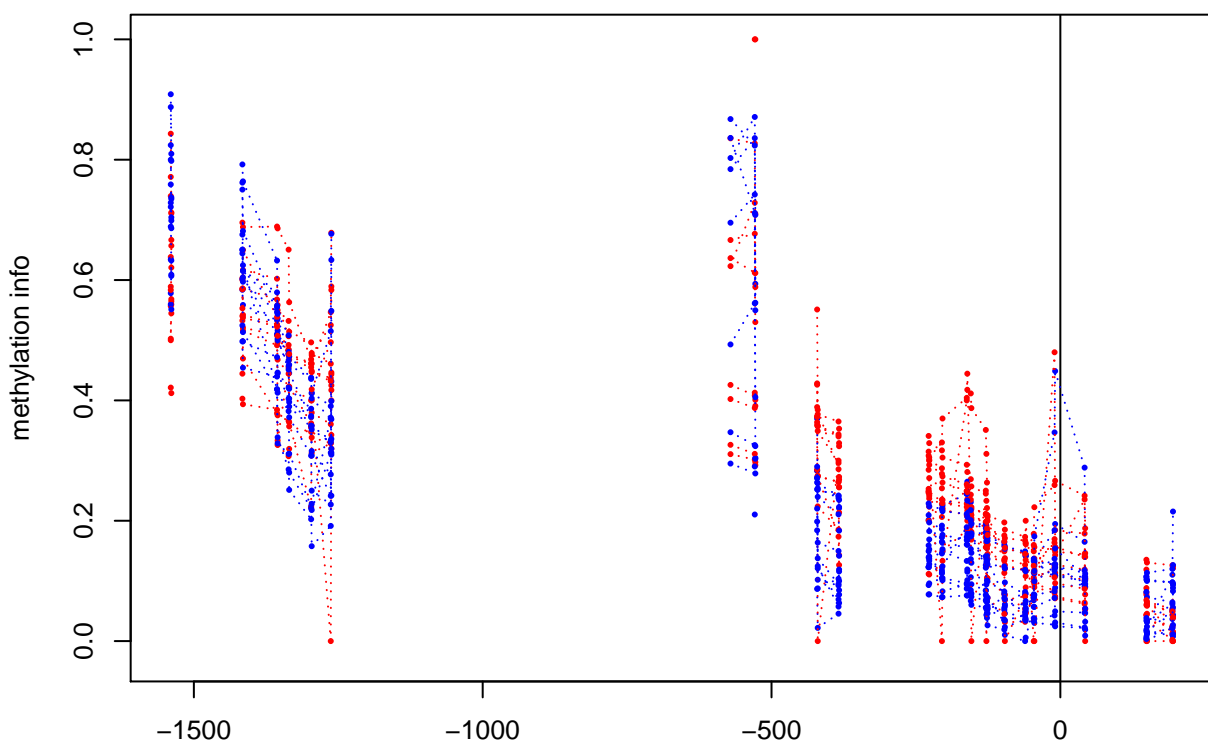

RNAseq logFC(UC-N)= -1.6

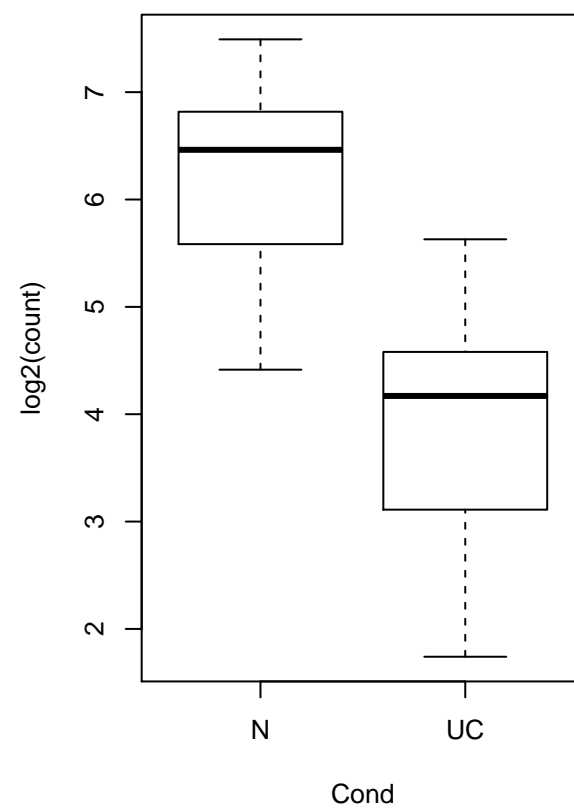

SLC1A3 average UC-N %methylation max=-0.31% min=-4.56%

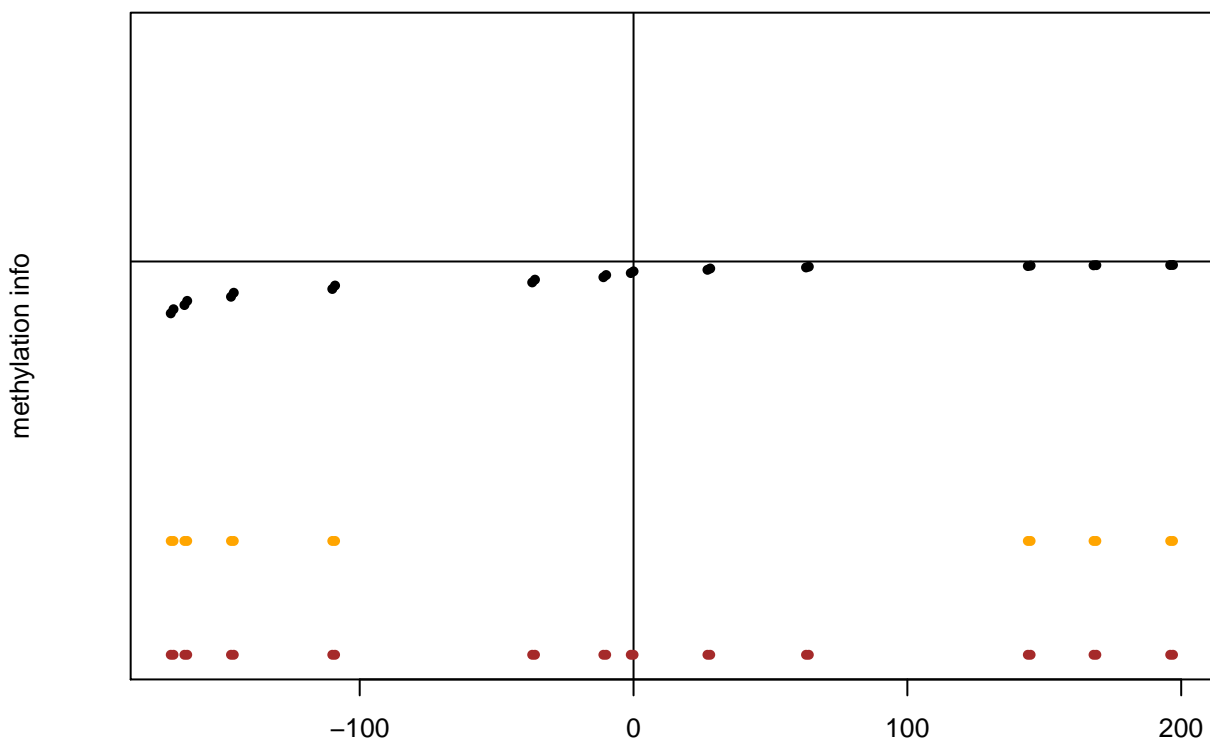

SLC1A3 raw %methylation, red=UC, blue=Normal

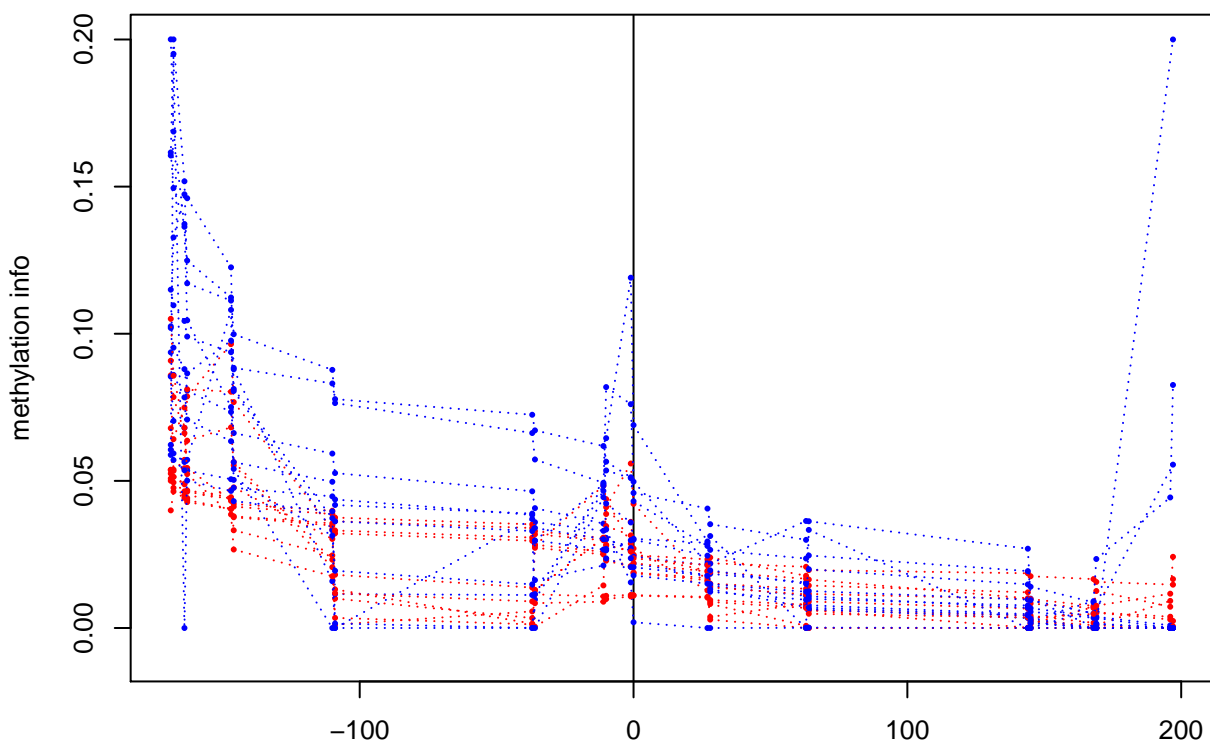

RNAseq logFC(UC-N)= 1.07

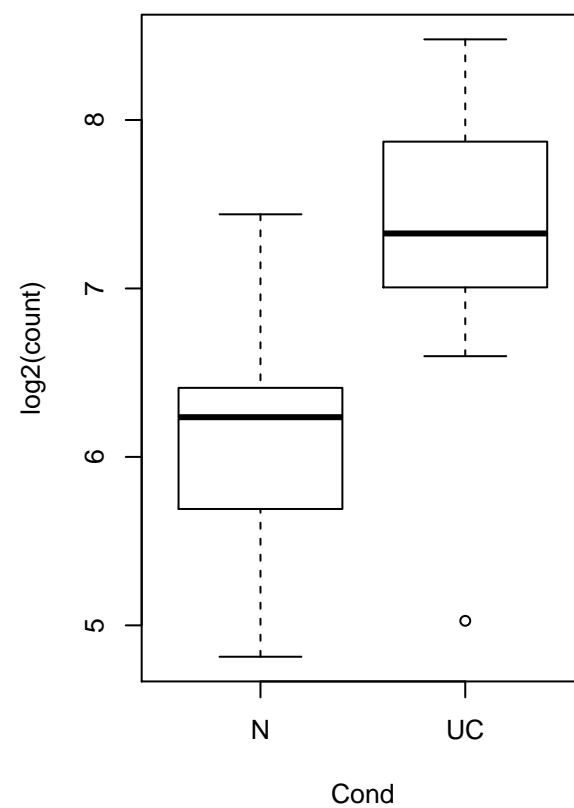

SLC22A4 average UC-N %methylation max=17.09% min=-1.31%

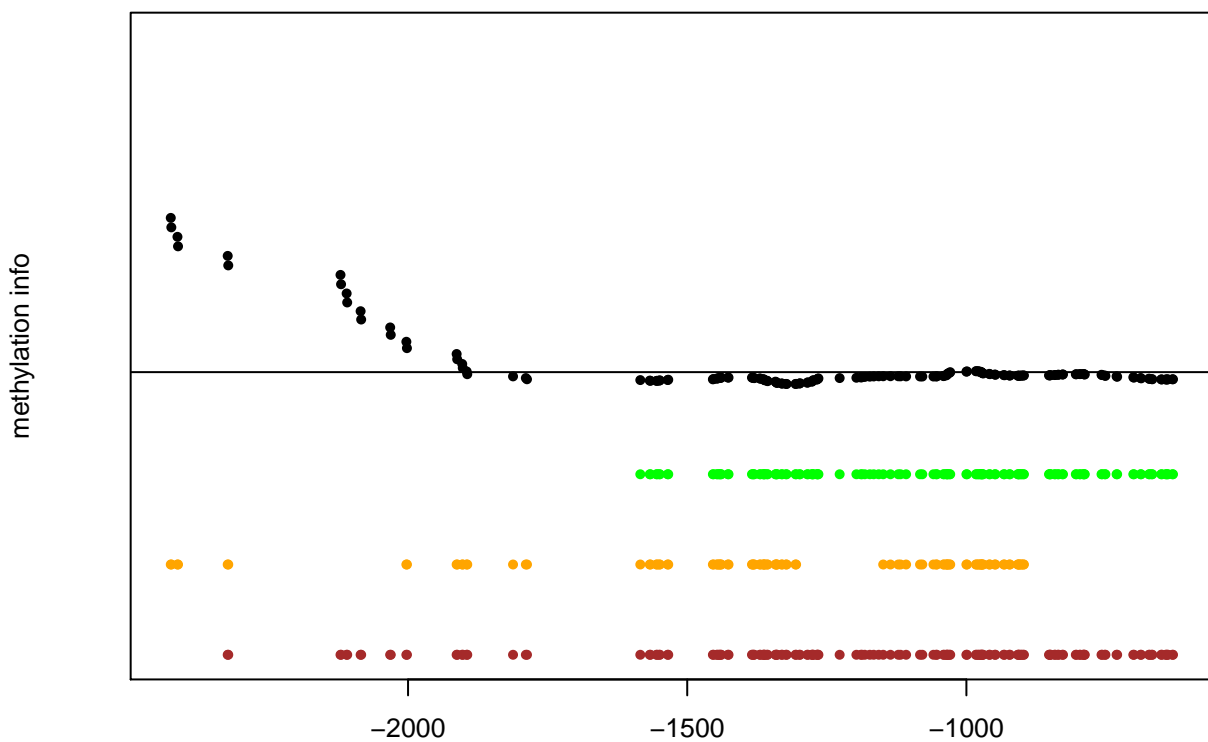

SLC22A4 raw %methylation, red=UC, blue=Normal

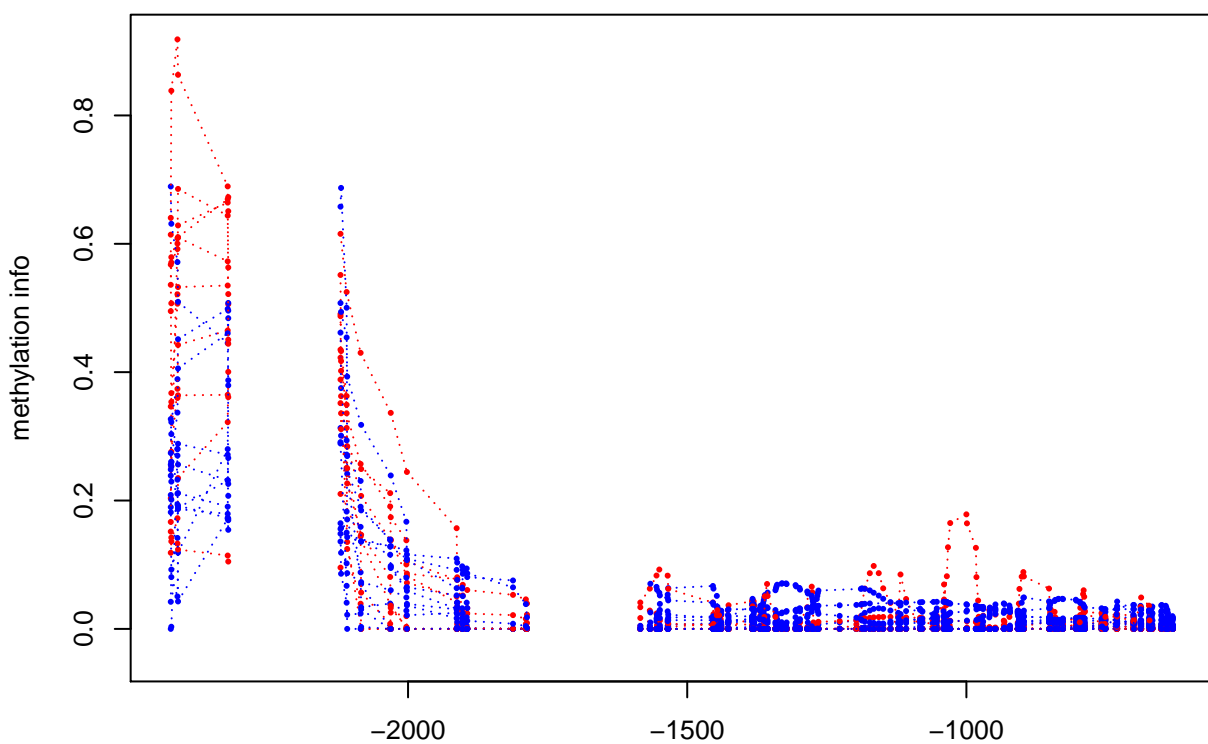

RNAseq logFC(UC-N)= -1.72

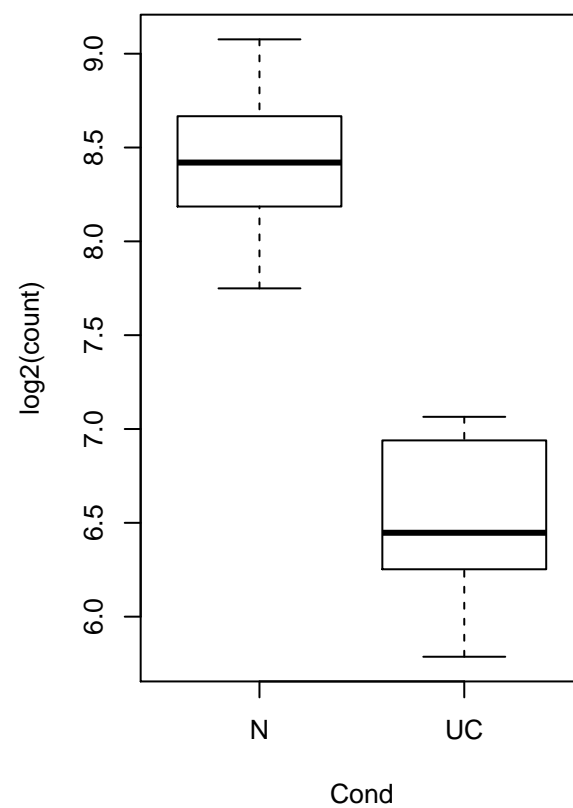

SLC25A34 average UC-N %methylation max=21.86% min=9.21%

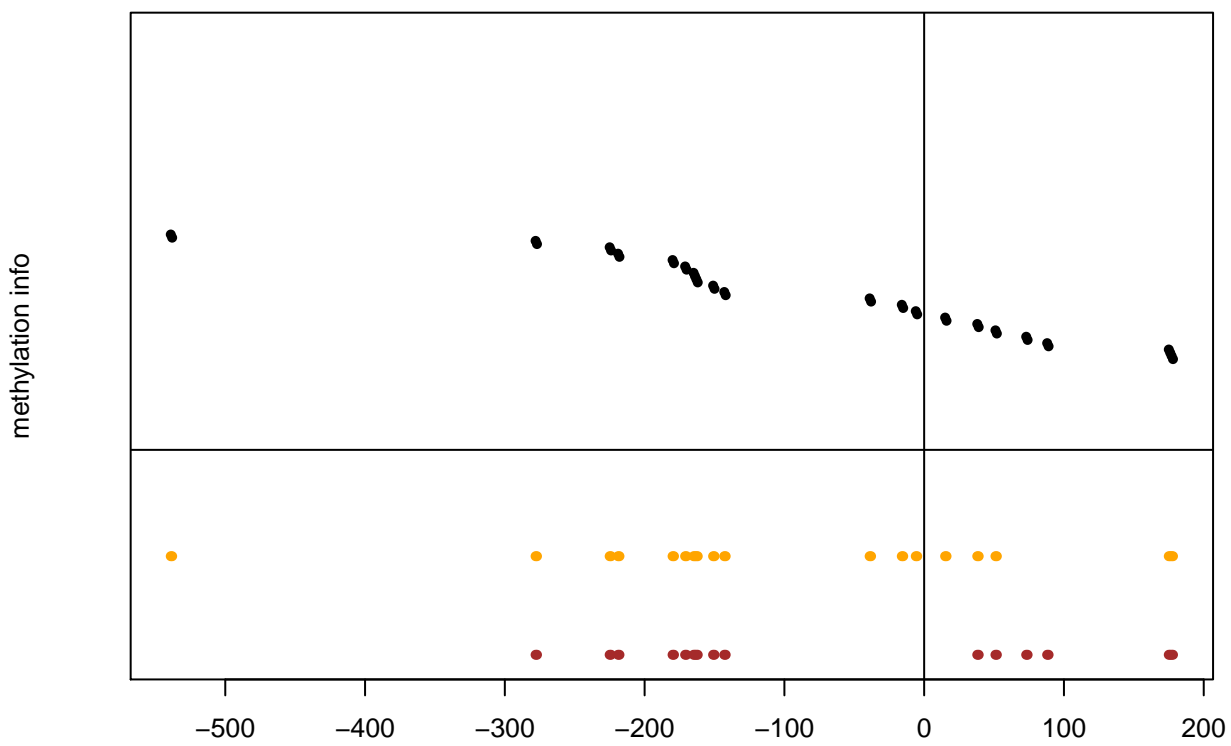

SLC25A34 raw %methylation, red=UC, blue=Normal

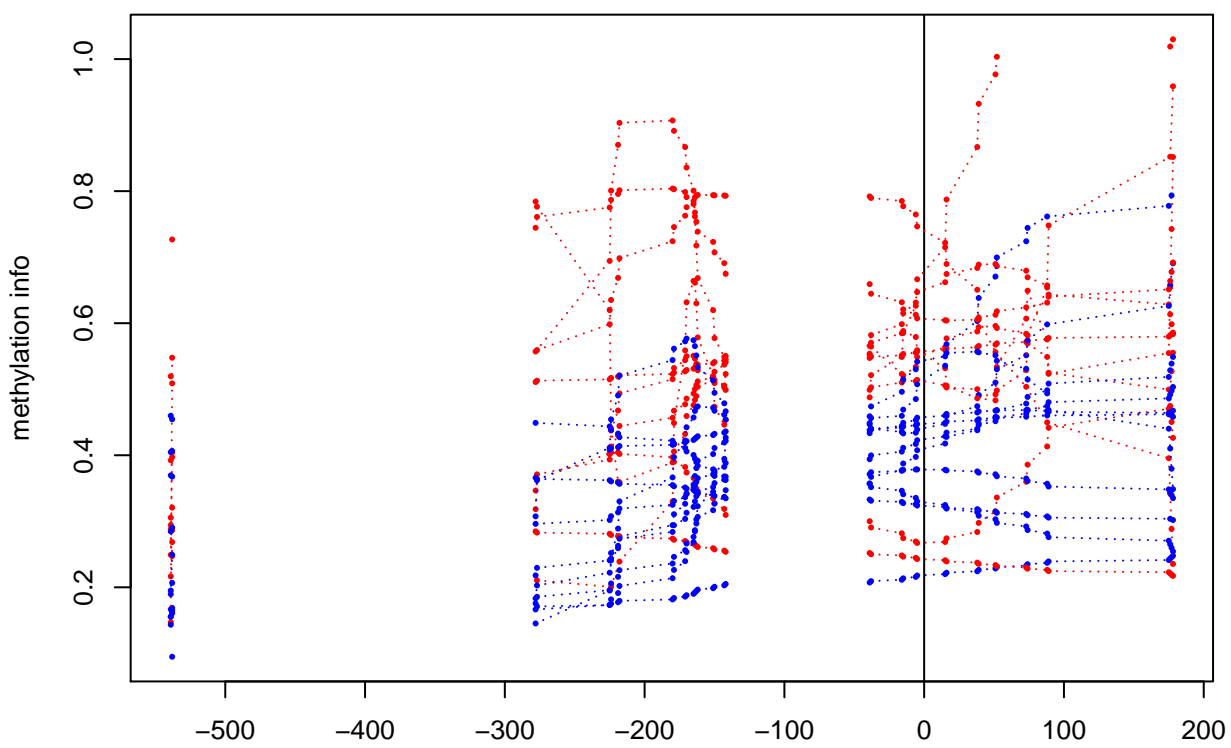

RNAseq logFC(UC-N)= -1.76

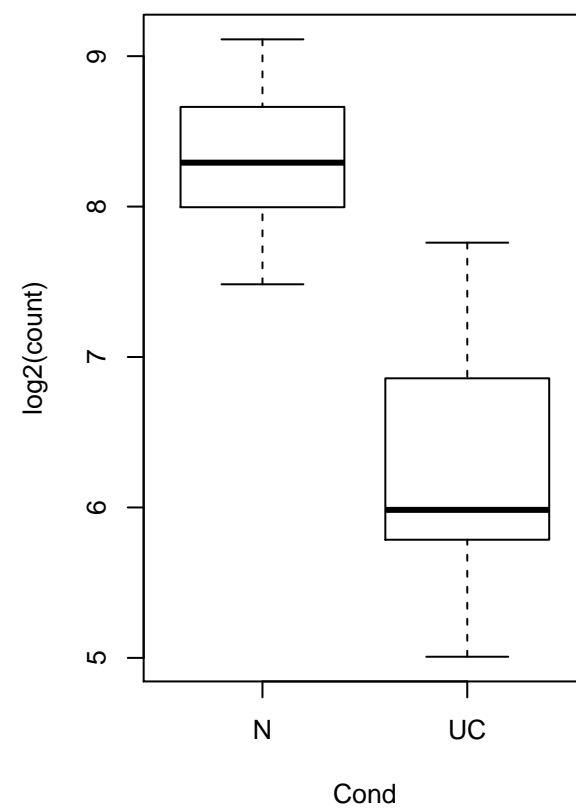

SLC26A4 average UC-N %methylation max=20.45% min=-29.4%

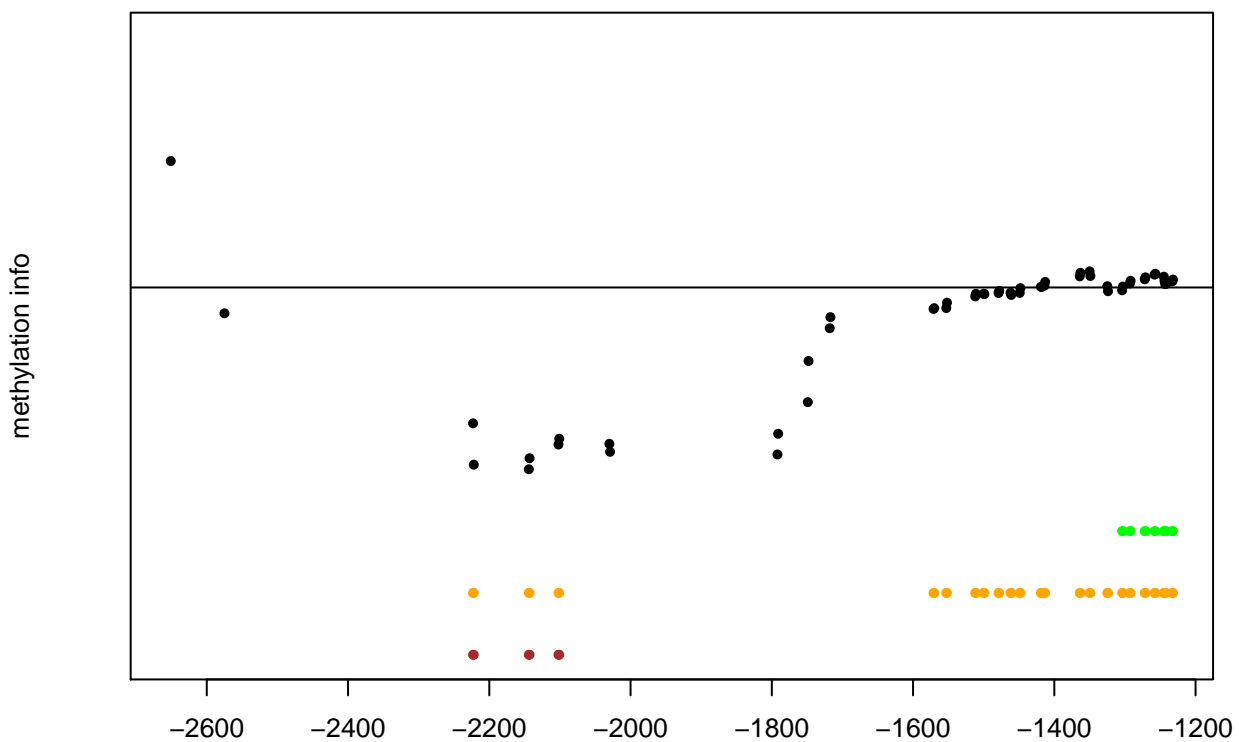

SLC26A4 raw %methylation, red=UC, blue=Normal

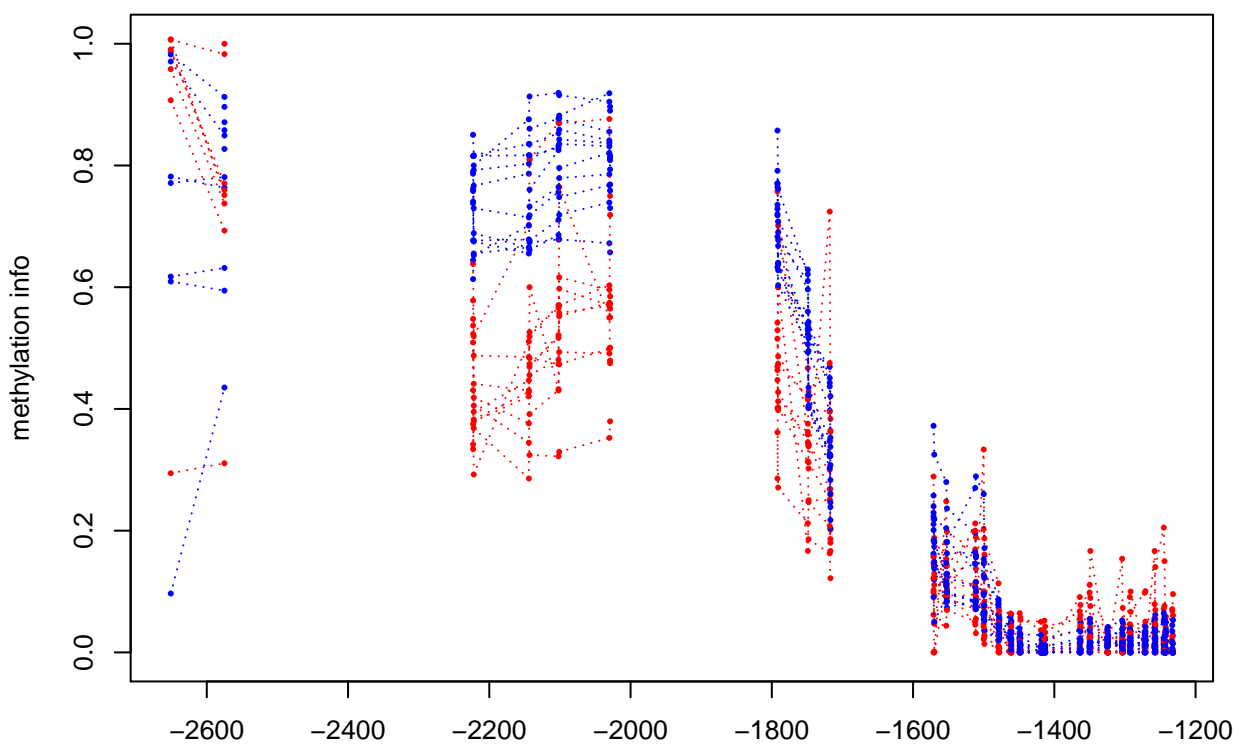

RNAseq logFC(UC-N)= 3.28

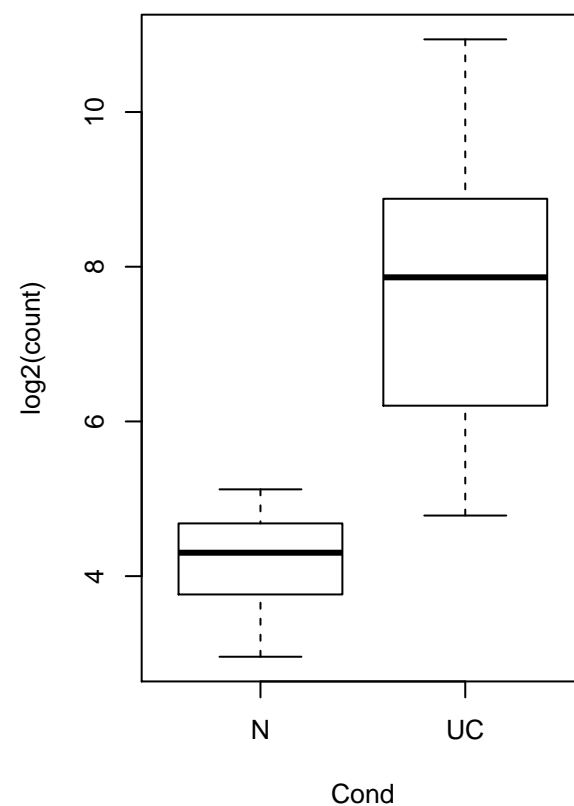



SLC30A10 average UC-N %methylation max=24.33% min=-0.03%

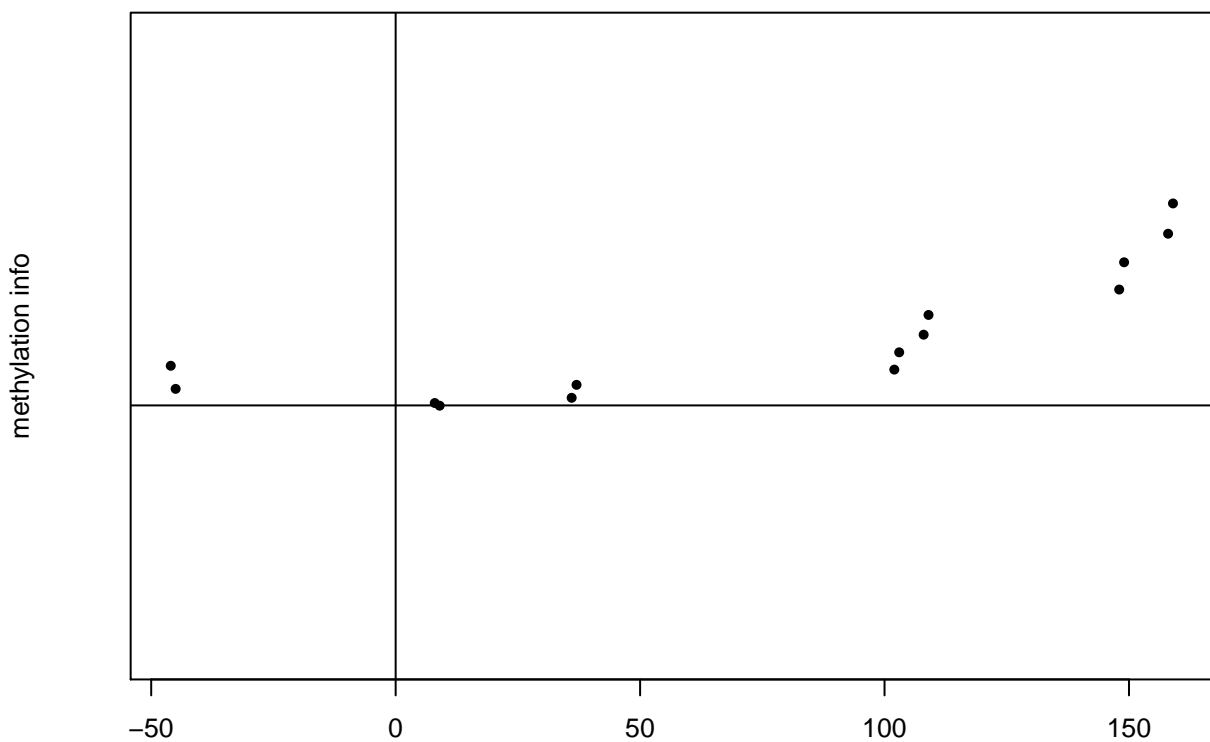

SLC30A10 raw %methylation, red=UC, blue=Normal

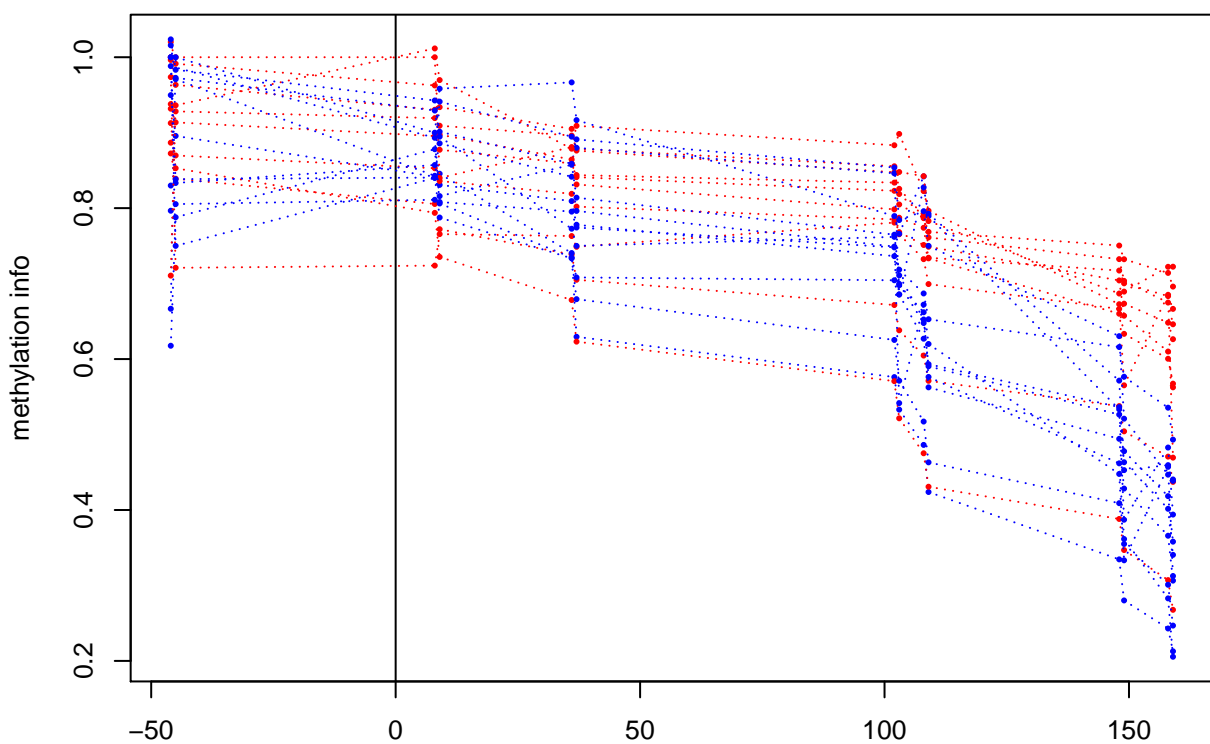

RNAseq logFC(UC-N)= -1.89

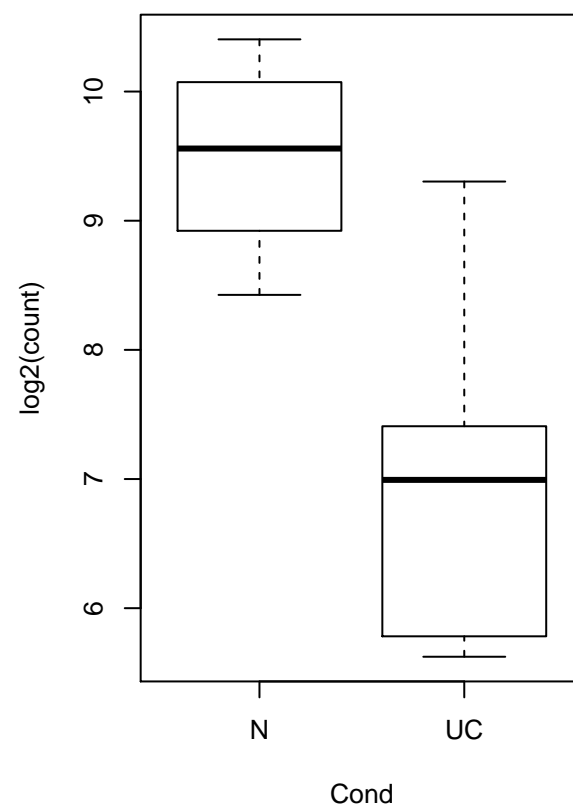

SLC39A2 average UC-N %methylation max=31.72% min=10.12%

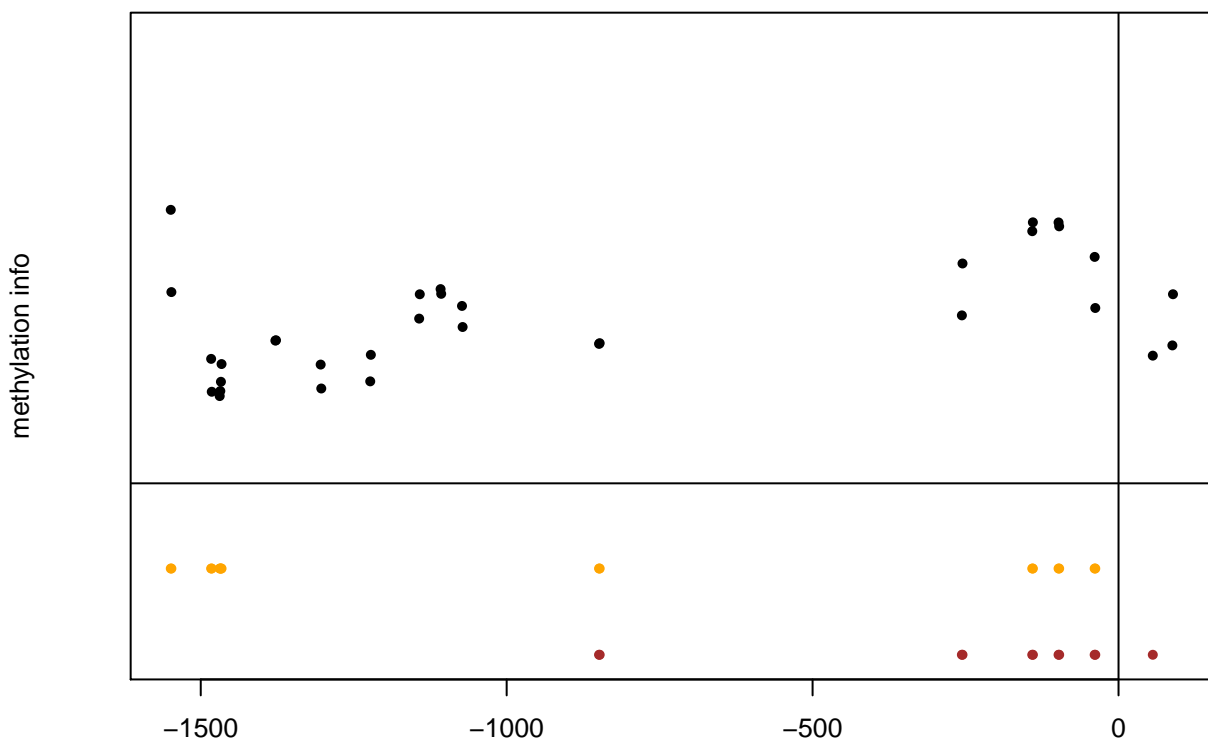

SLC39A2 raw %methylation, red=UC, blue=Normal

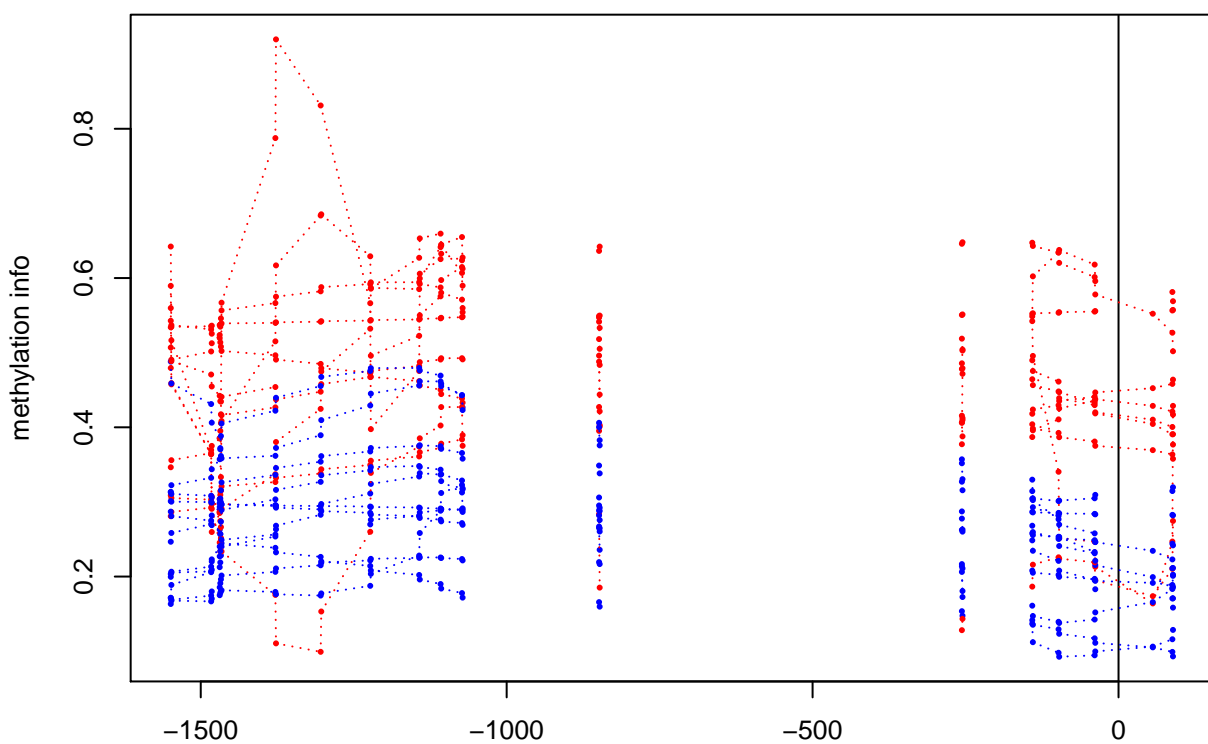

RNAseq logFC(UC-N)= -1.4

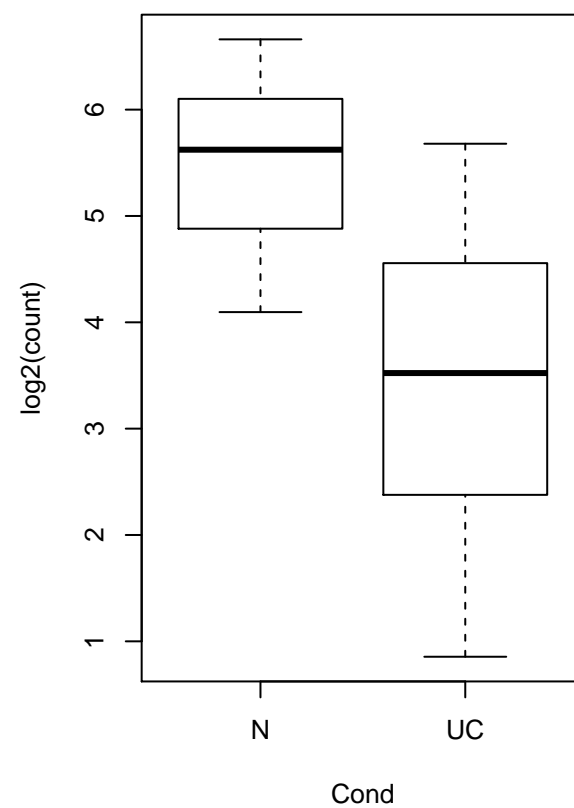

SLC3A1 average UC-N %methylation max=27.42% min=13.68%

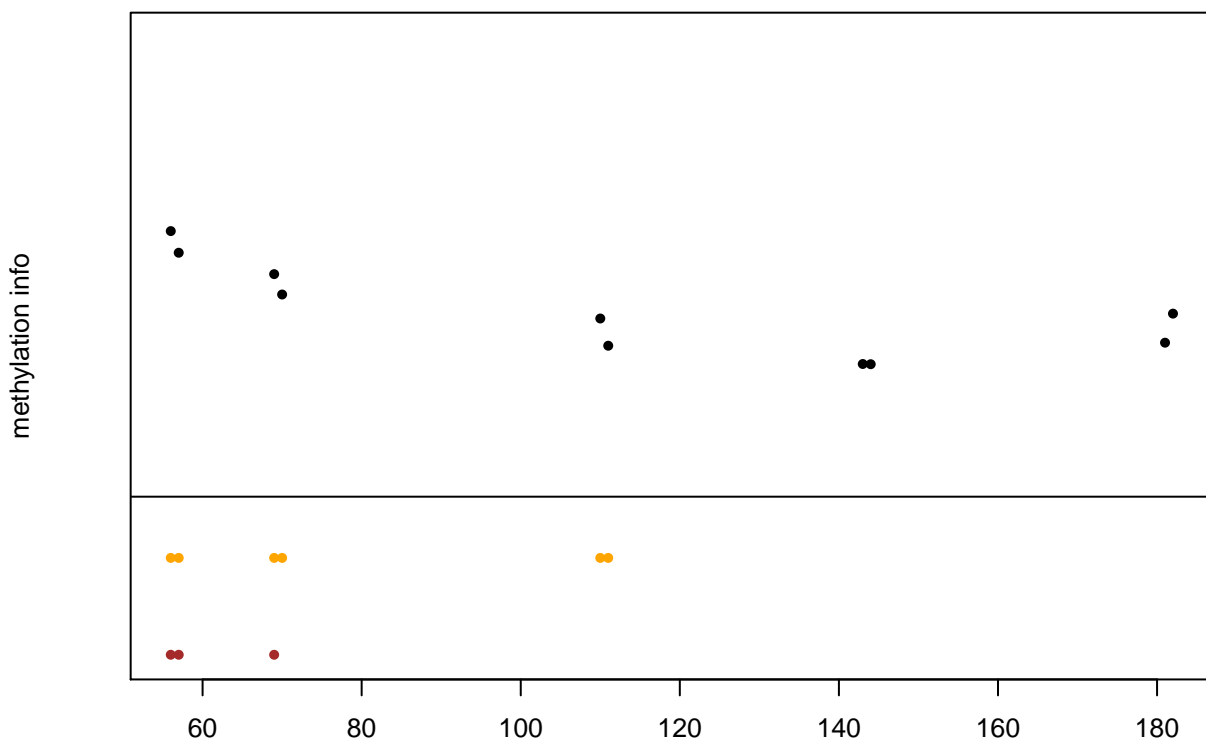

SLC3A1 raw %methylation, red=UC, blue=Normal

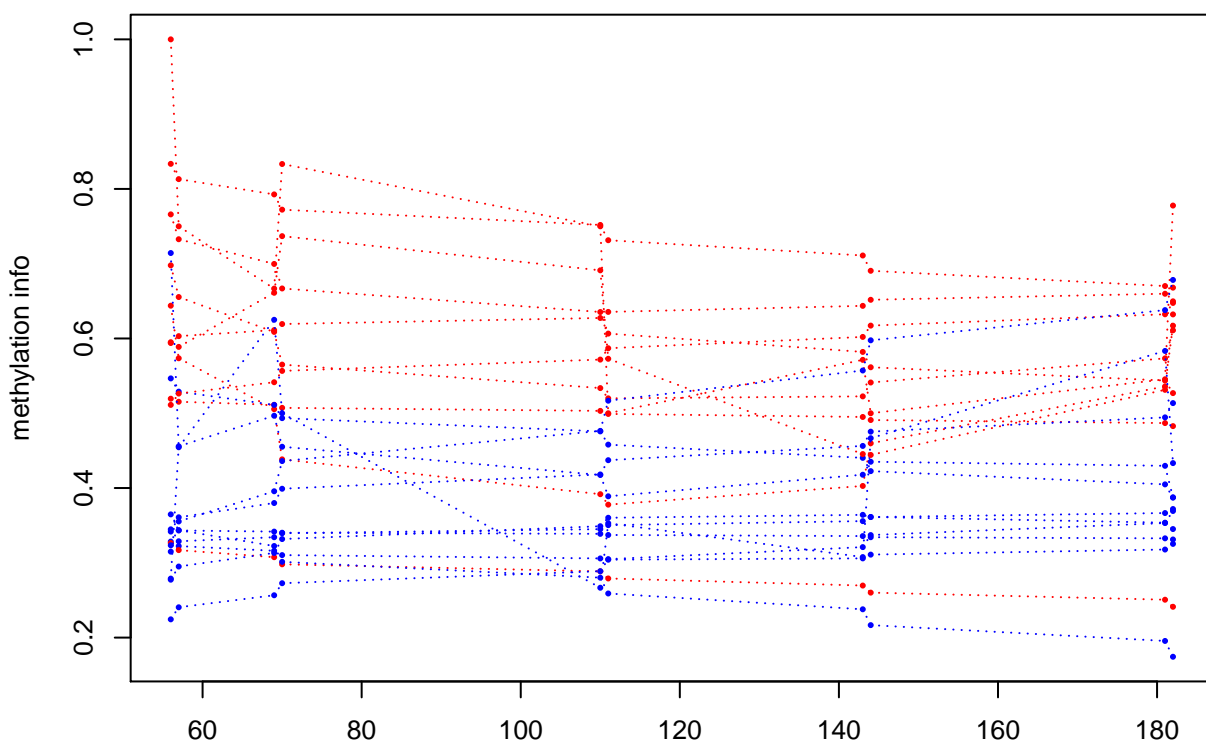

RNAseq logFC(UC-N) = -2.43

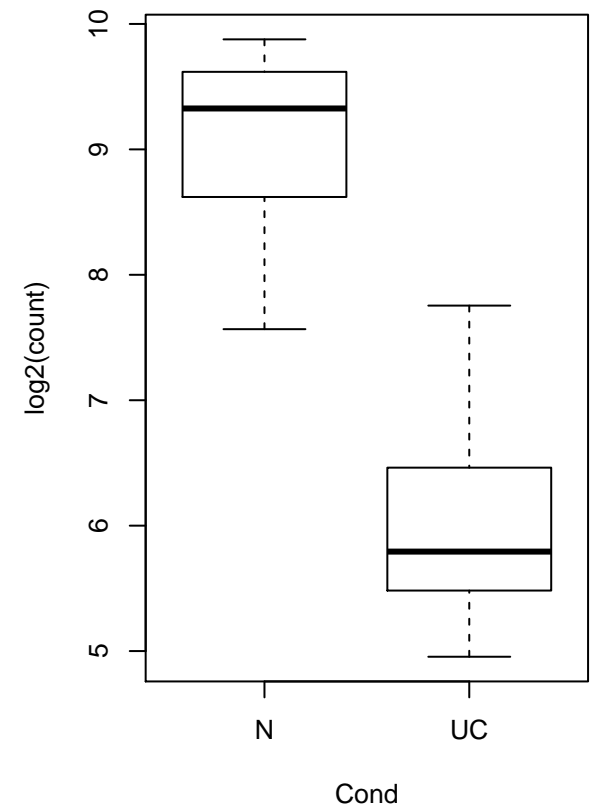

SLC51B average UC-N %methylation max=17.08% min=12.37%

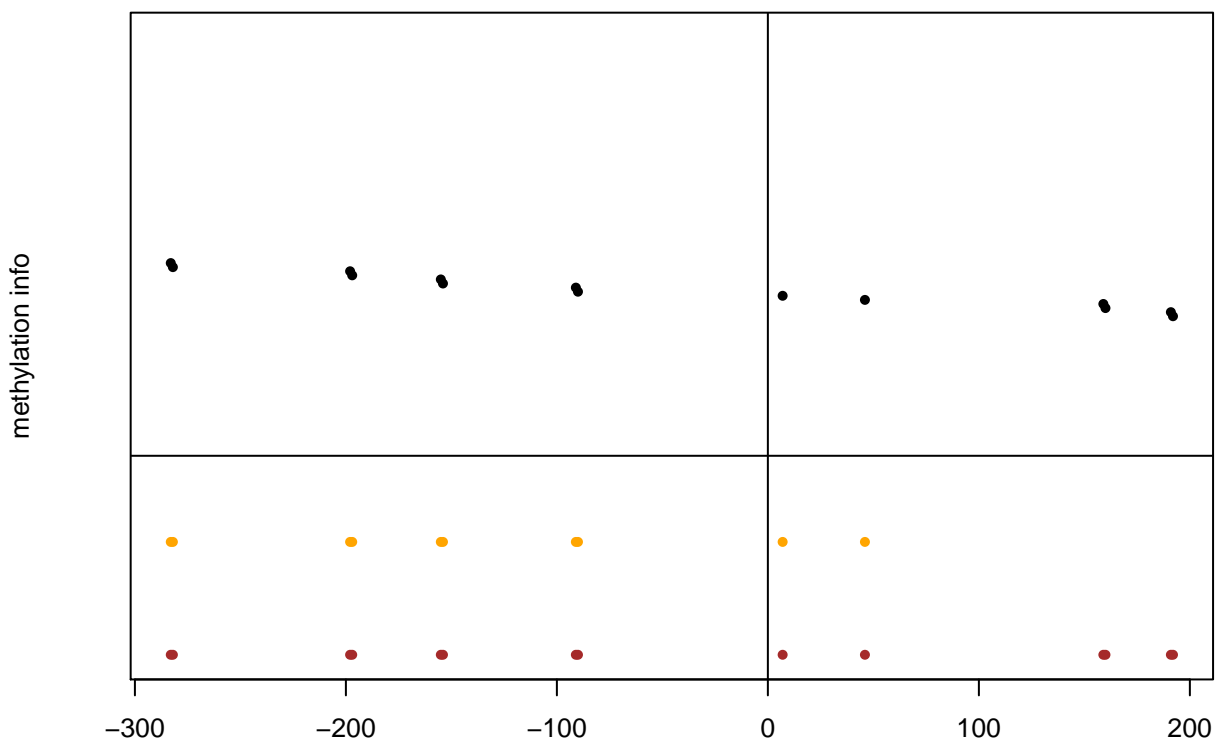

SLC51B raw %methylation, red=UC, blue=Normal

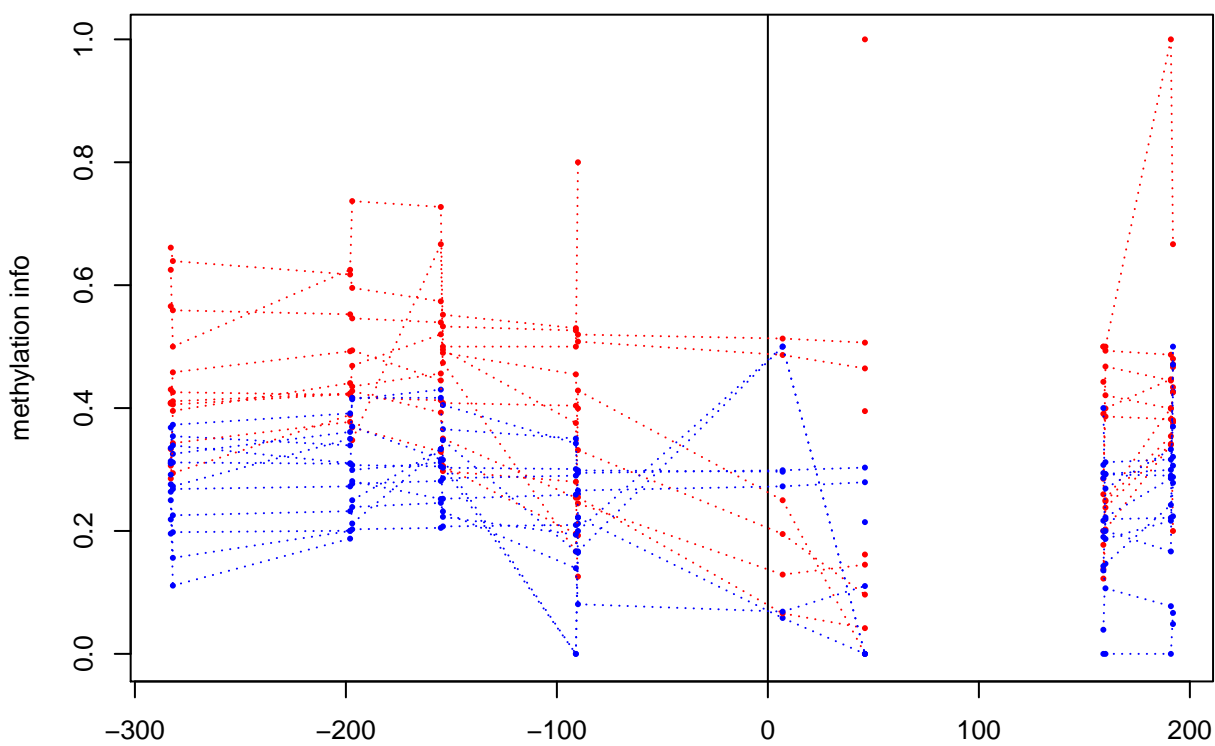

RNAseq logFC(UC-N)= -1.28

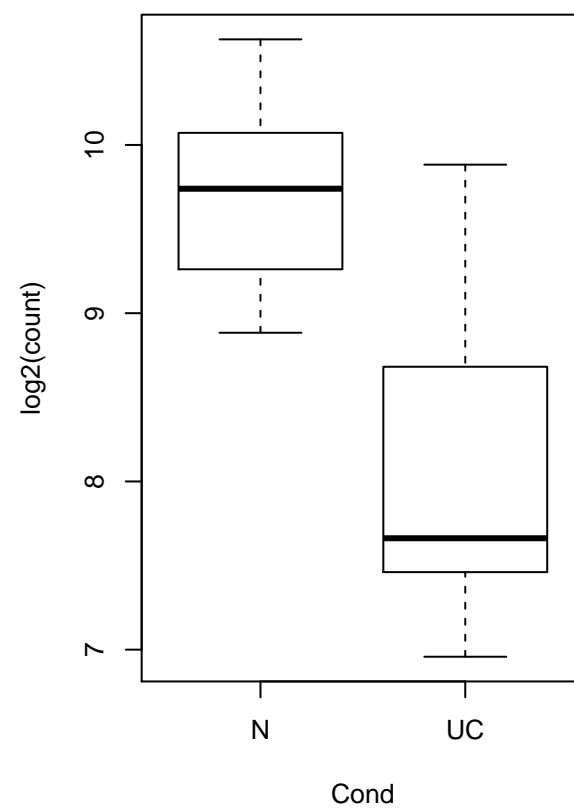

SLC6A14 average UC-N %methylation max=18.13% min=-42.97%

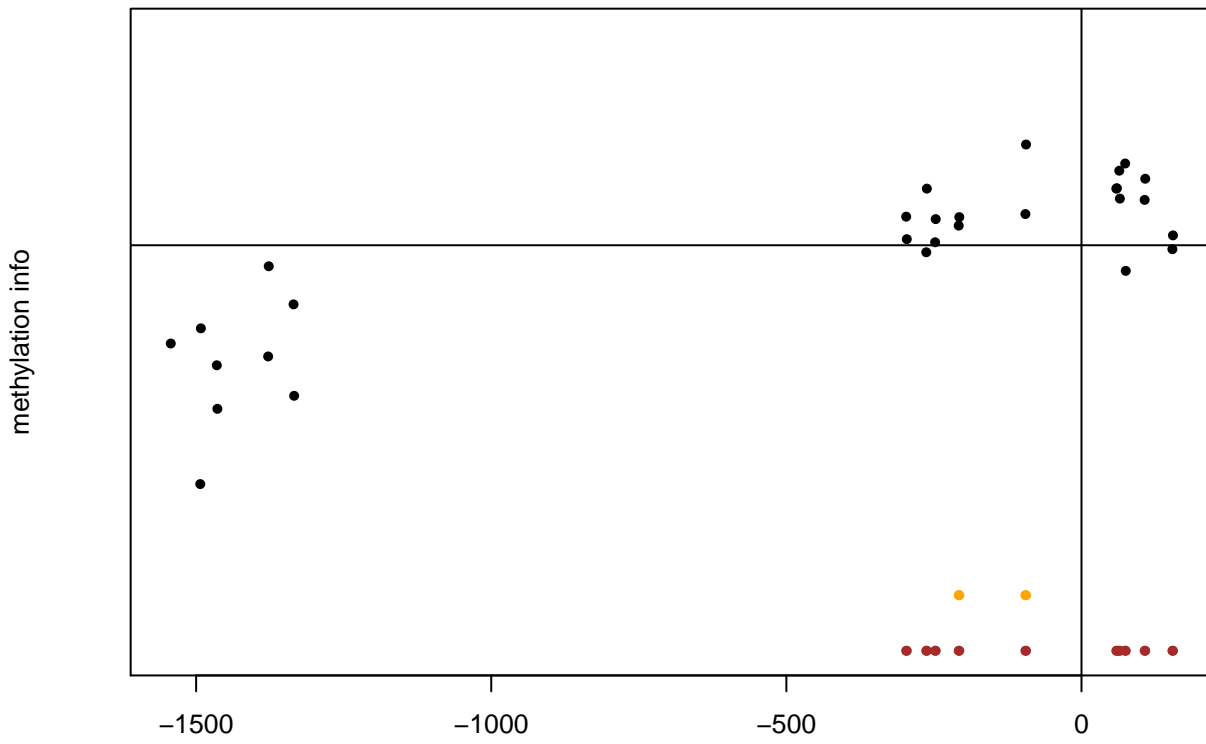

SLC6A14 raw %methylation, red=UC, blue=Normal

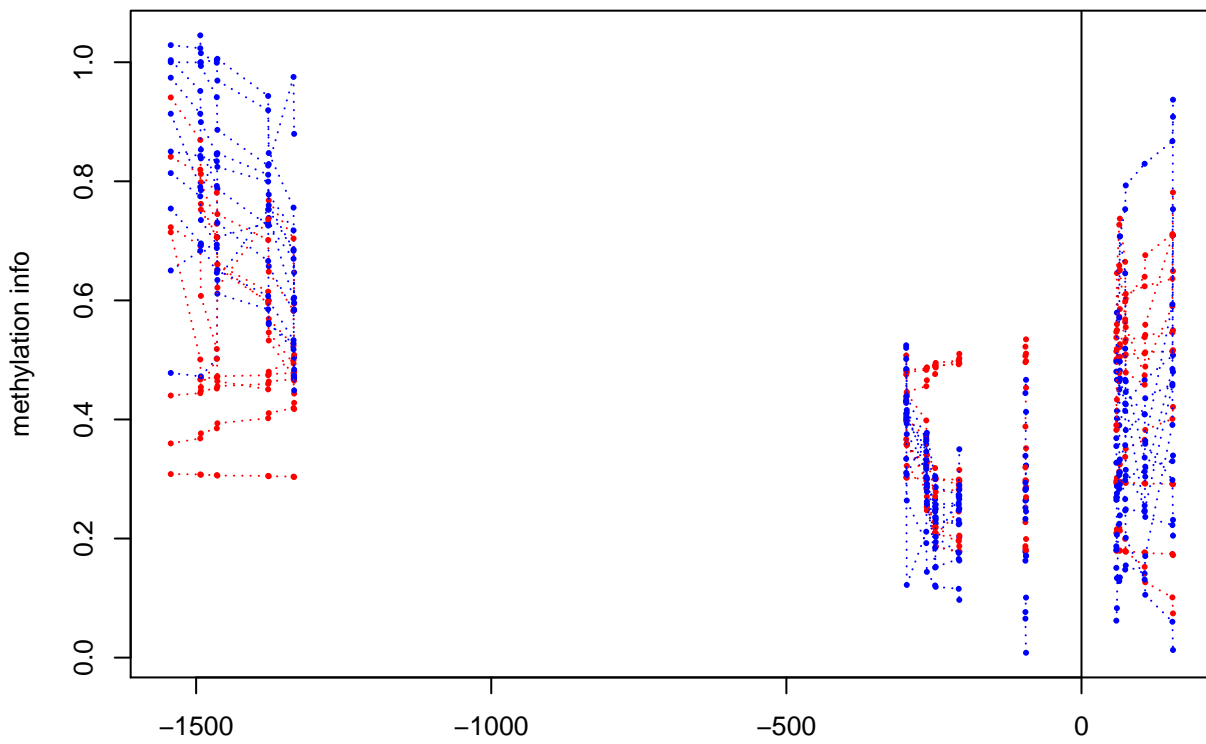

RNAseq logFC(UC-N)= 5.66

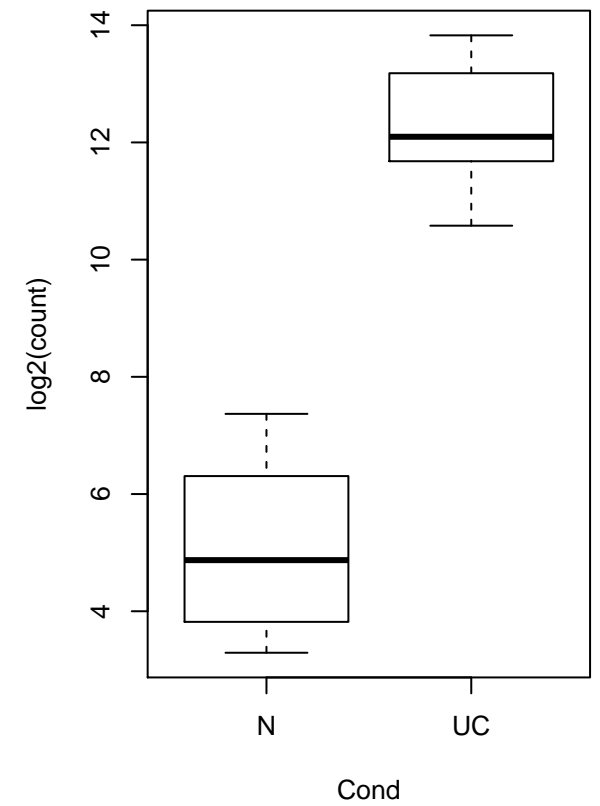

SLC6A19 average UC-N %methylation max=18.34% min=3.24%

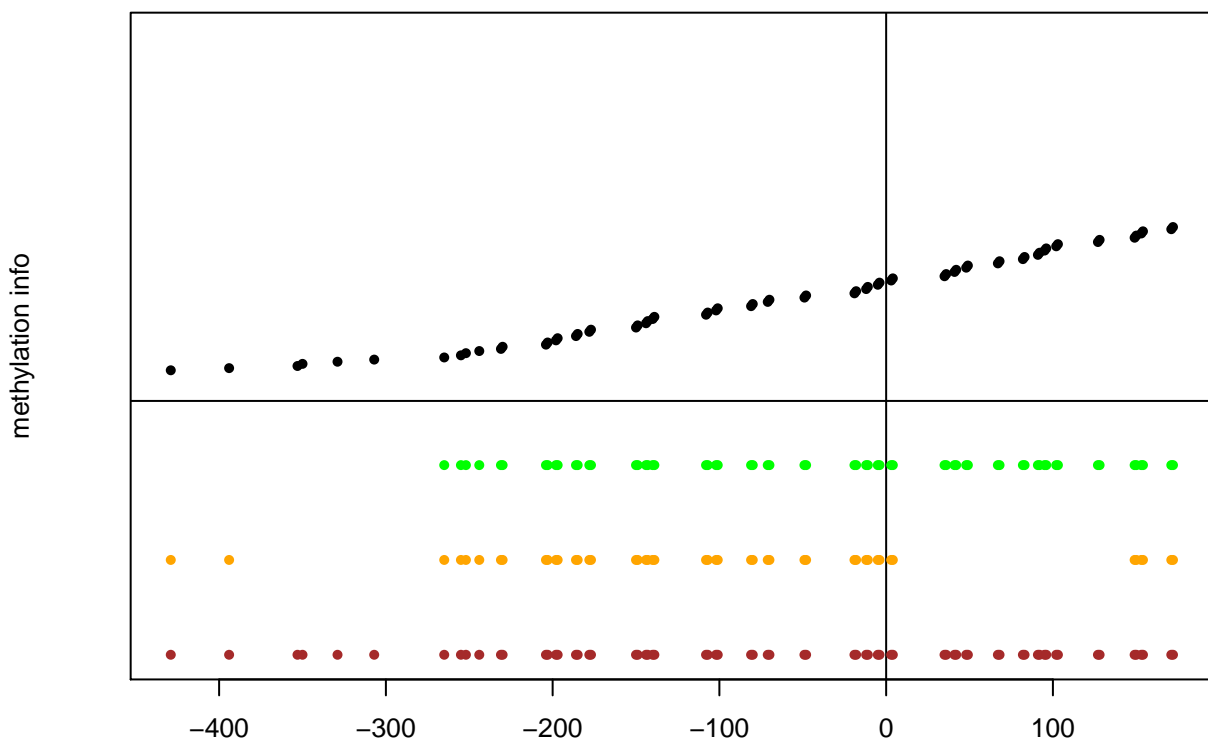

SLC6A19 raw %methylation, red=UC, blue=Normal

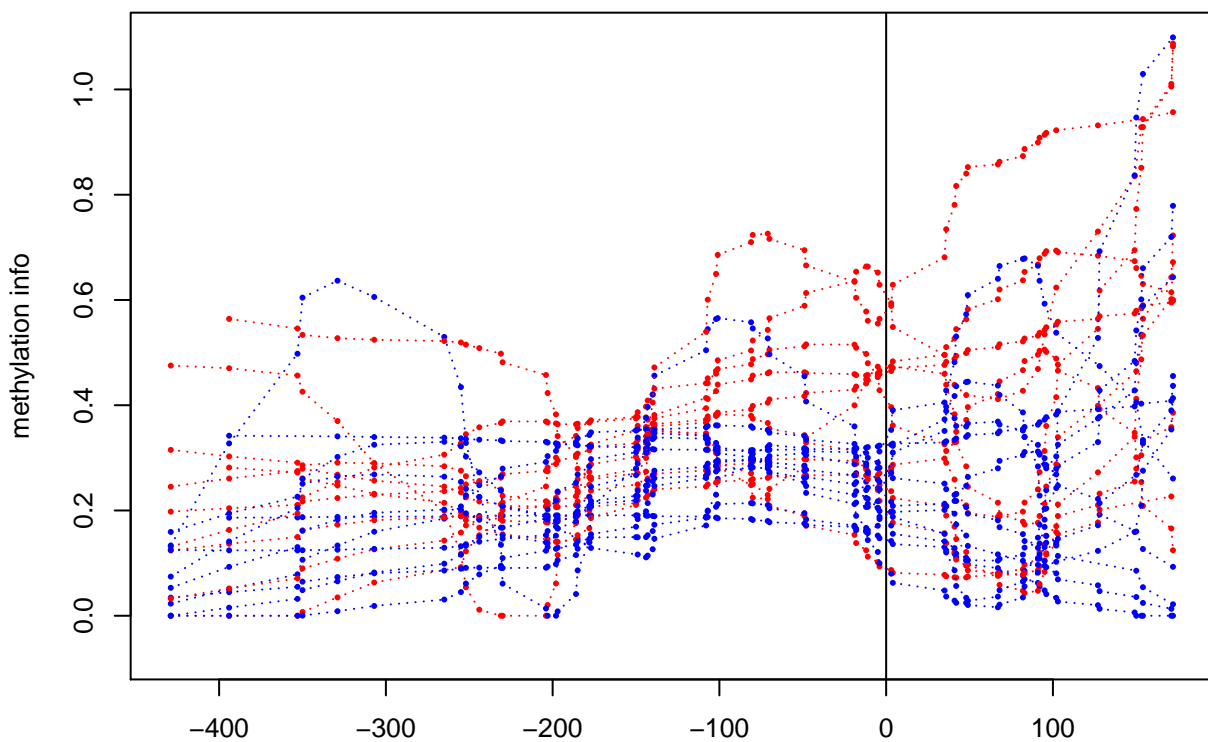

RNAseq logFC(UC-N)= -2.82

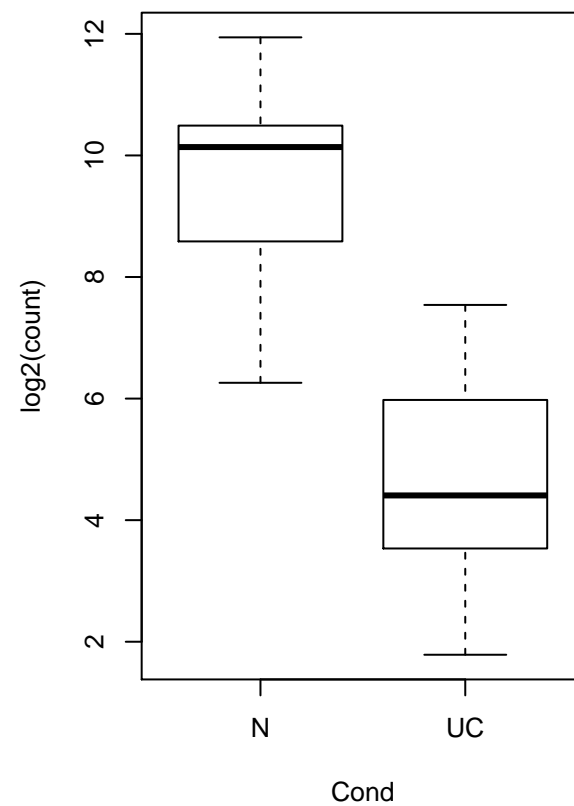

SLC9C1 average UC-N %methylation max=15.37% min=12.68%

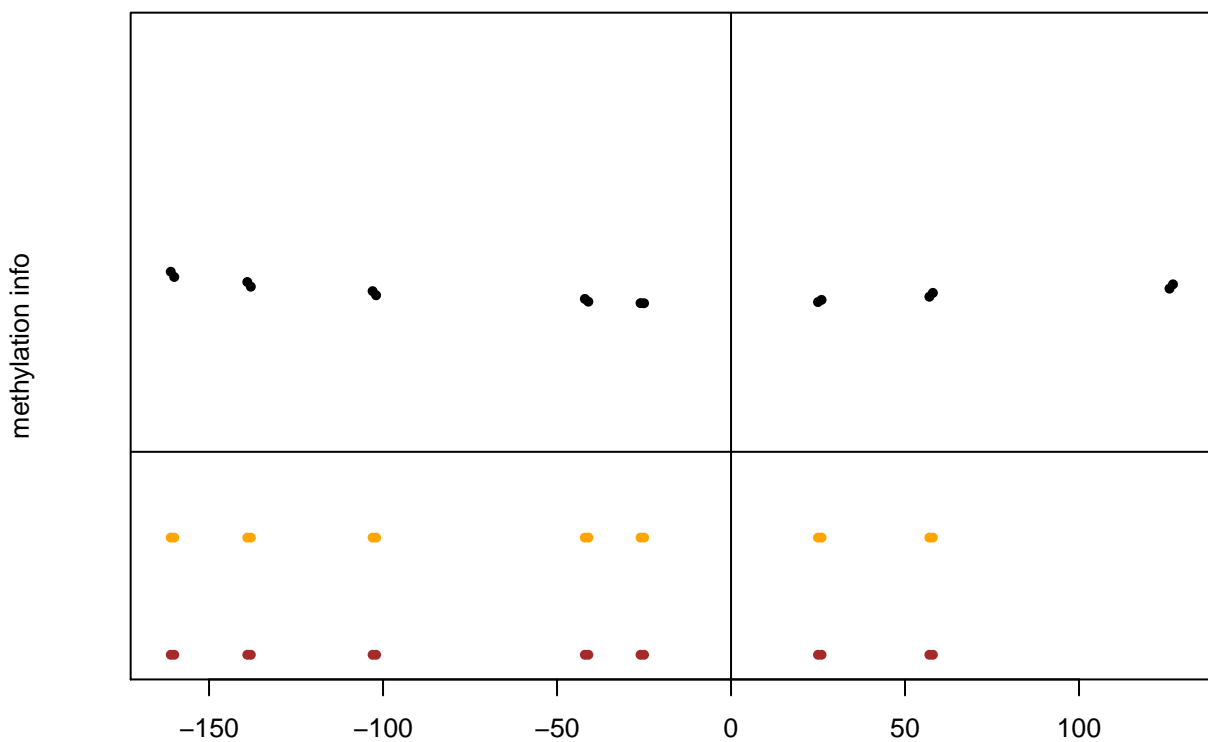

SLC9C1 raw %methylation, red=UC, blue=Normal

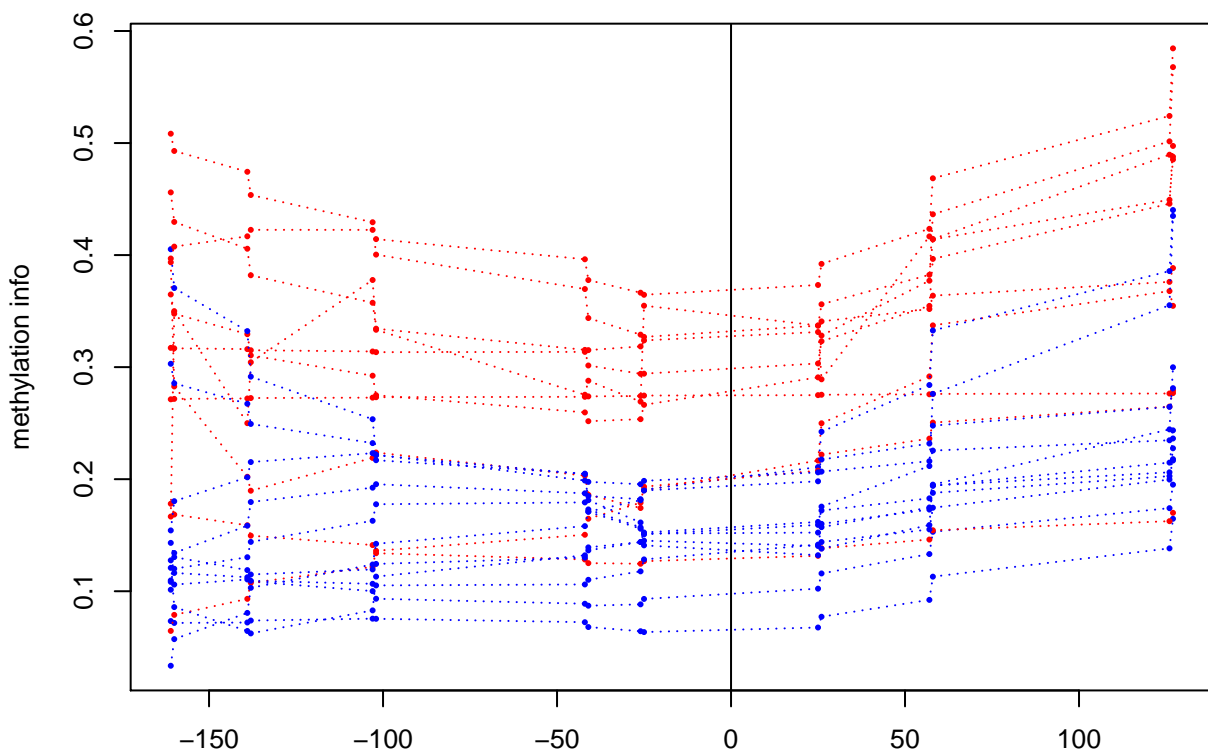

RNAseq logFC(UC-N)= -1.2

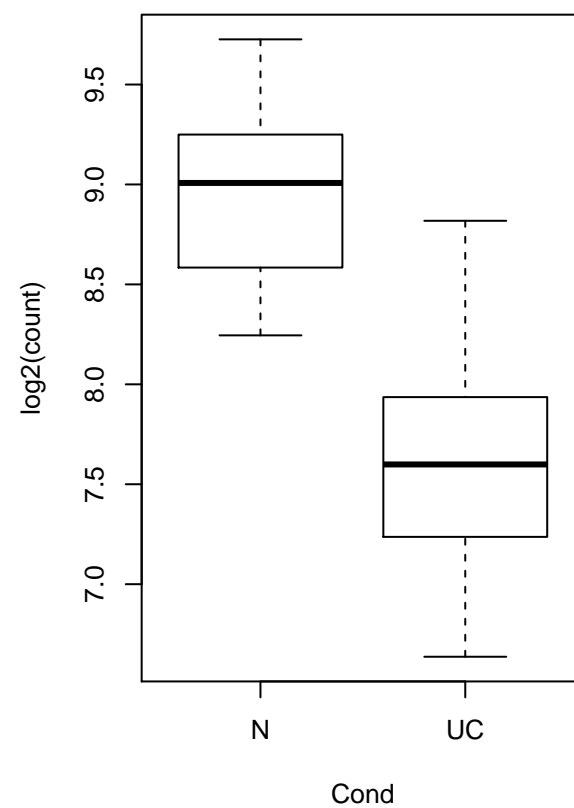

SNX20 average UC-N %methylation max=-28.96% min=-37.66%

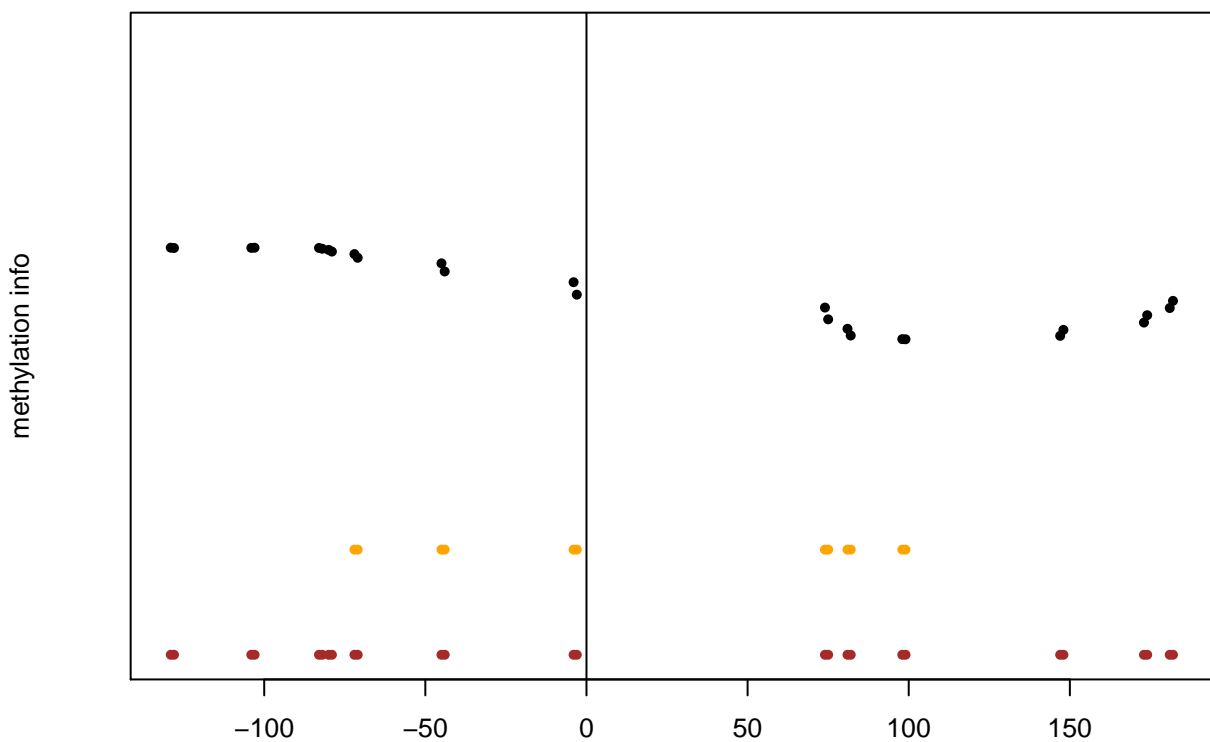

SNX20 raw %methylation, red=UC, blue=Normal

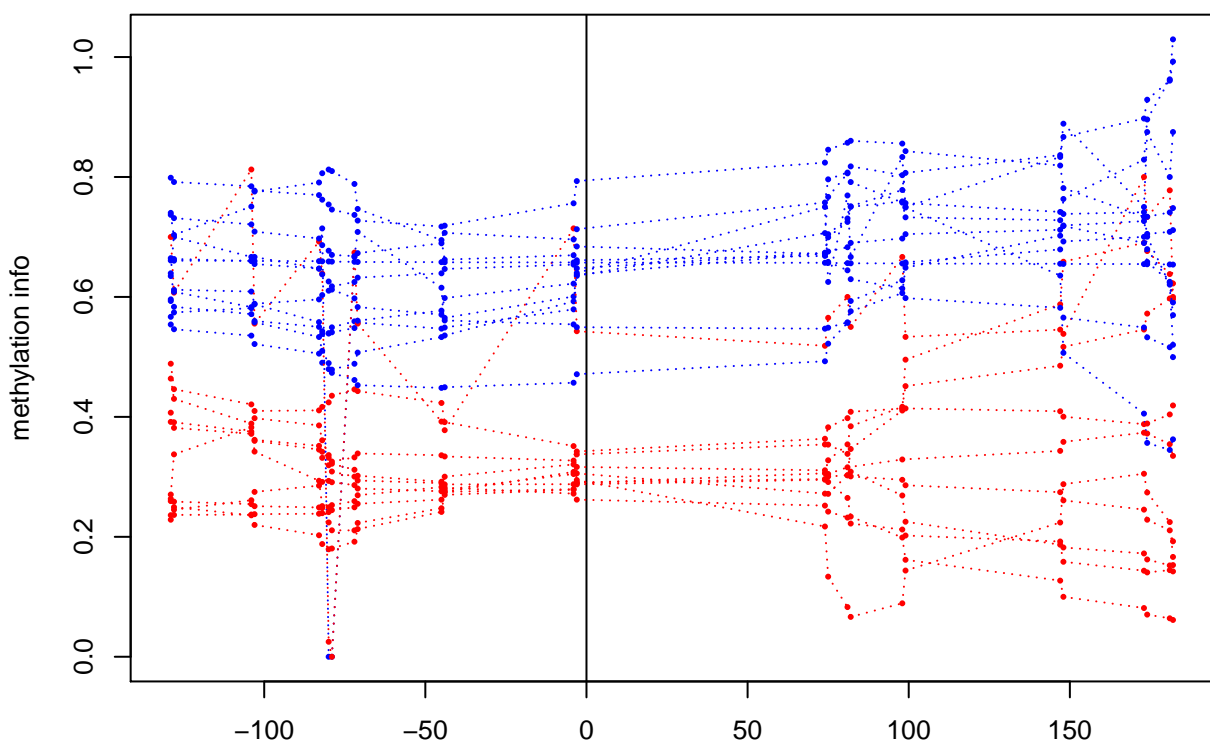

RNAseq logFC(UC-N)= 1.61

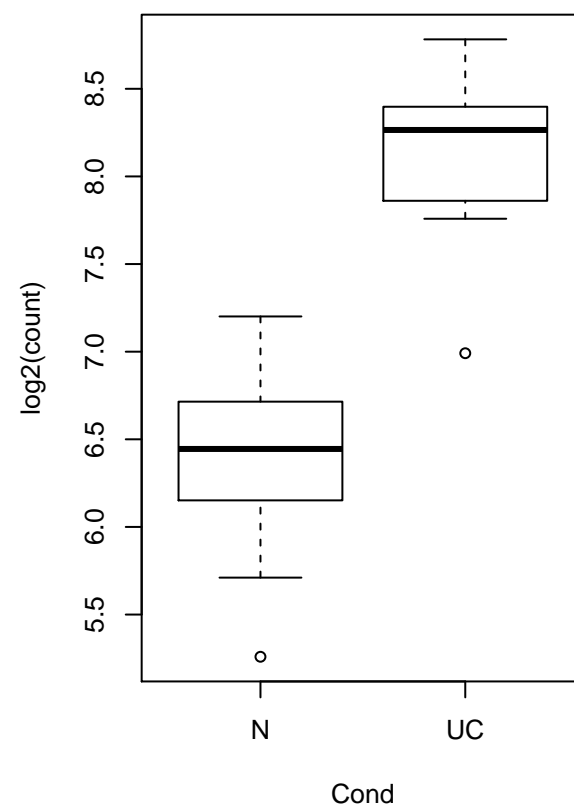



SORCS2 average UC-N %methylation max=6.46% min=-7.83%

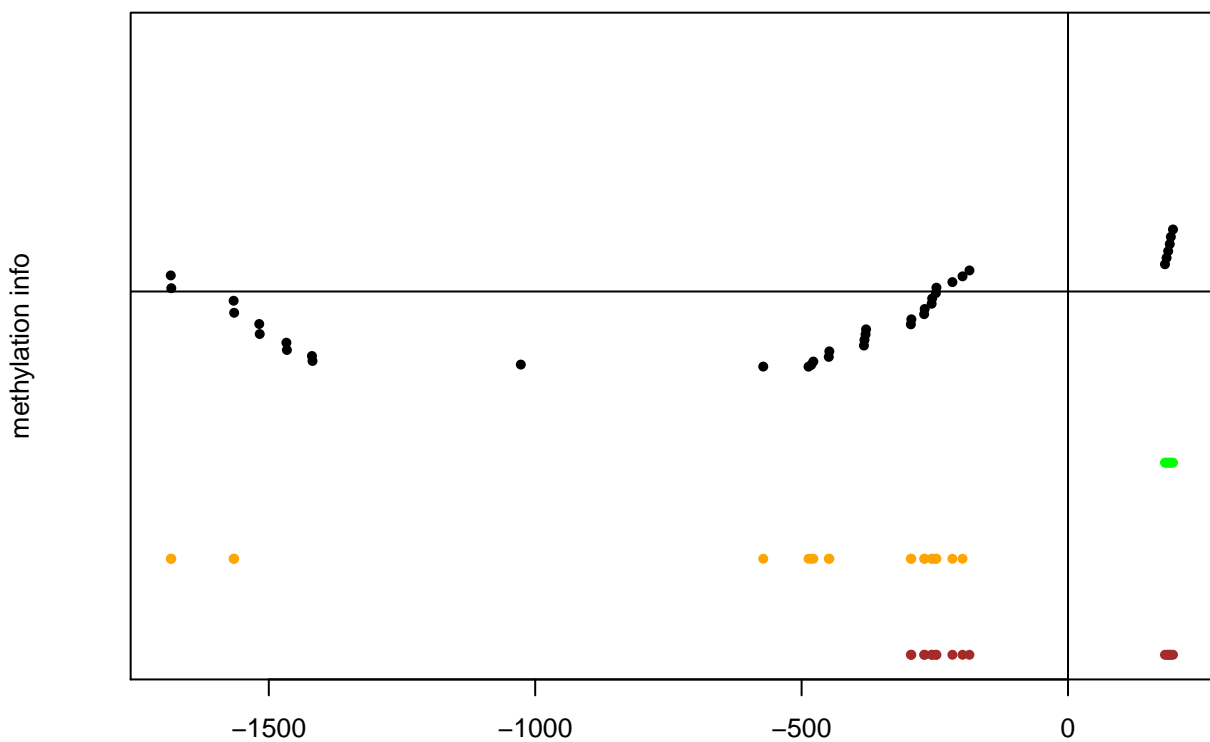

SORCS2 raw %methylation, red=UC, blue=Normal

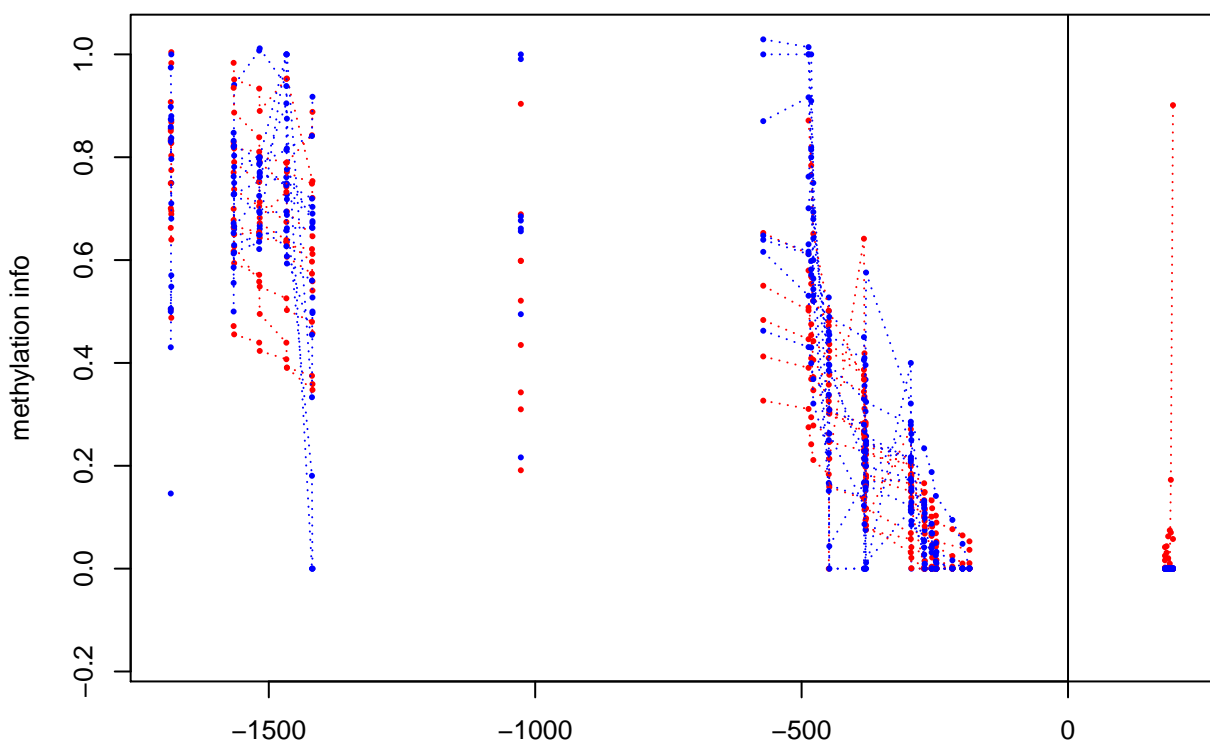

RNAseq logFC(UC-N)= 1.17

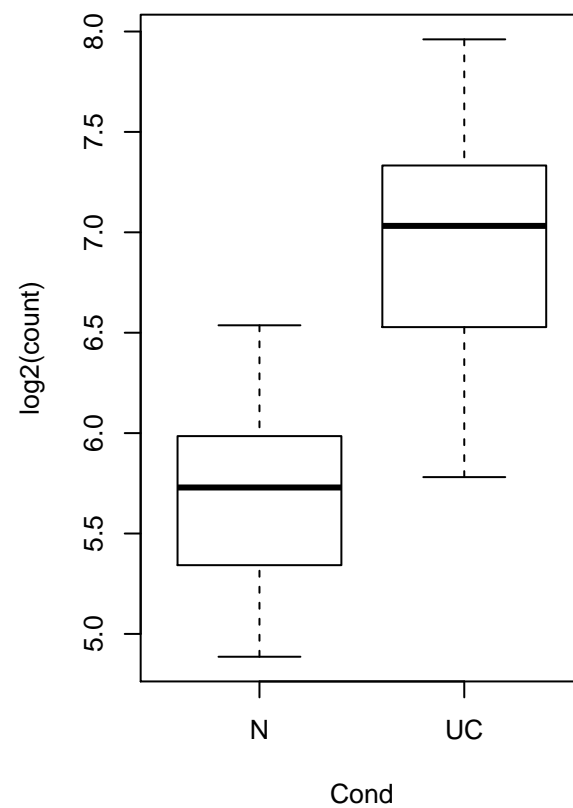

SP140 average UC-N %methylation max=-9.39% min=-29.98%

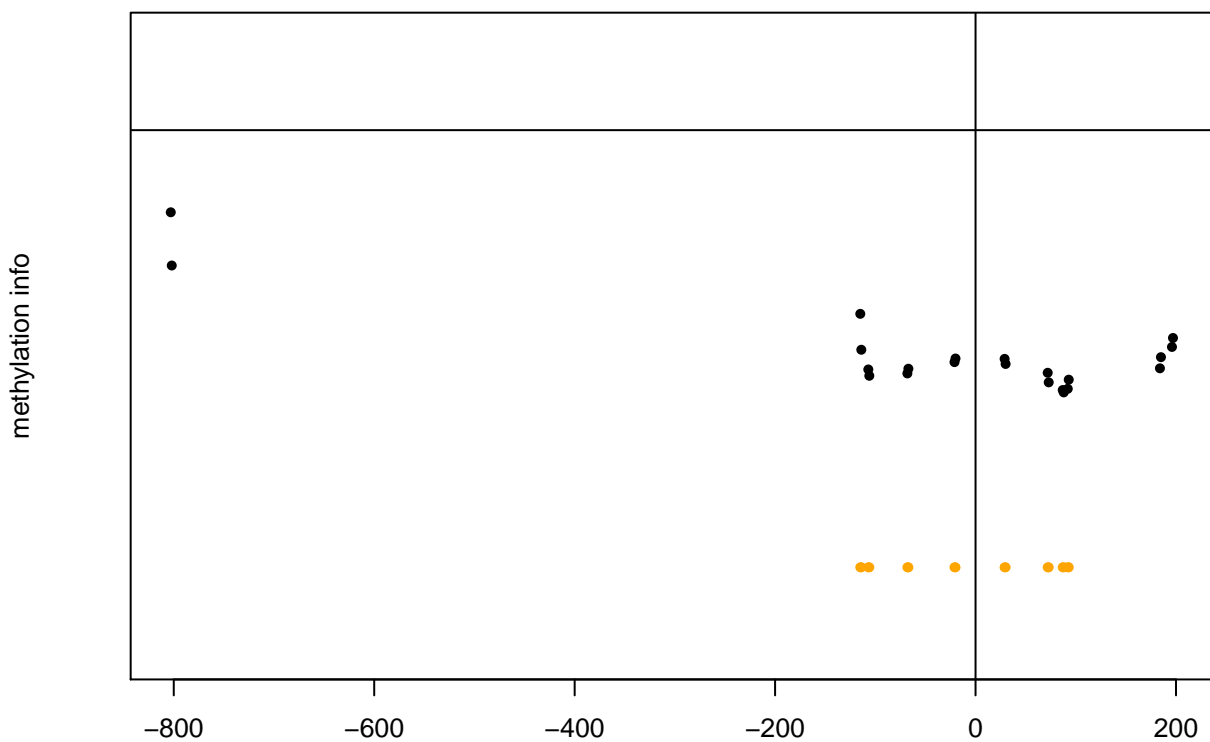

SP140 raw %methylation, red=UC, blue=Normal

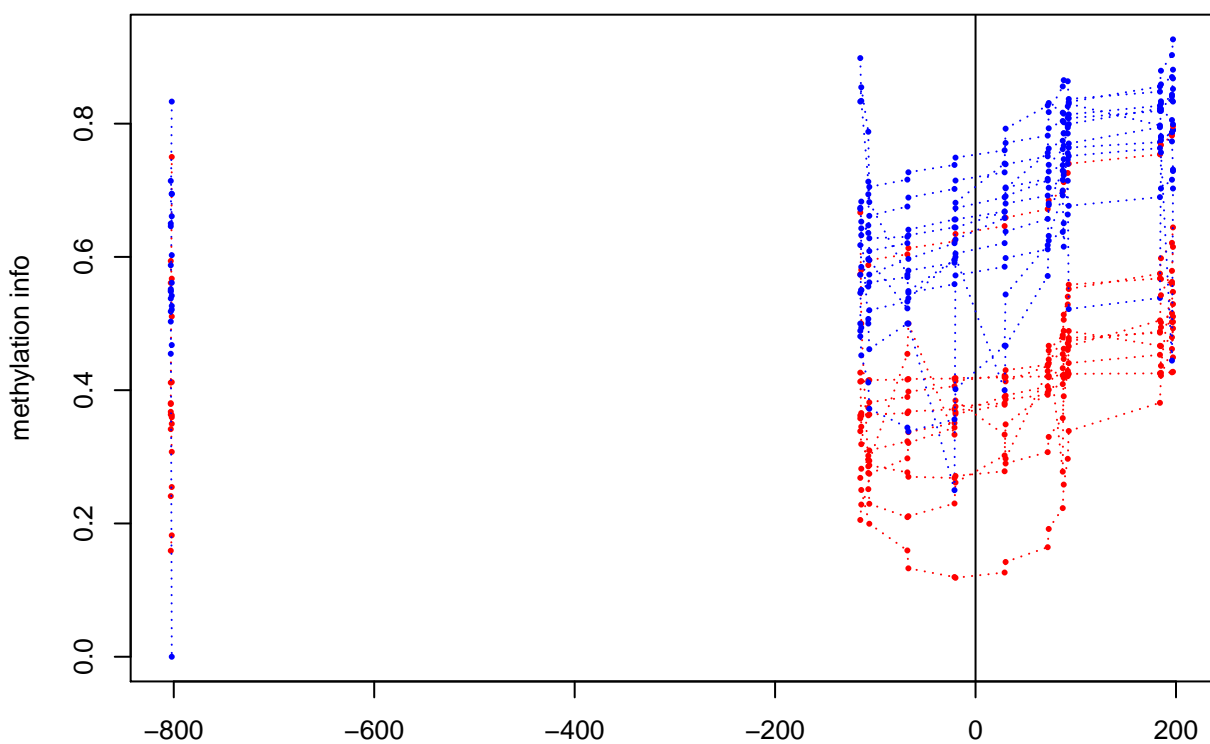

RNAseq logFC(UC-N)= 1.67

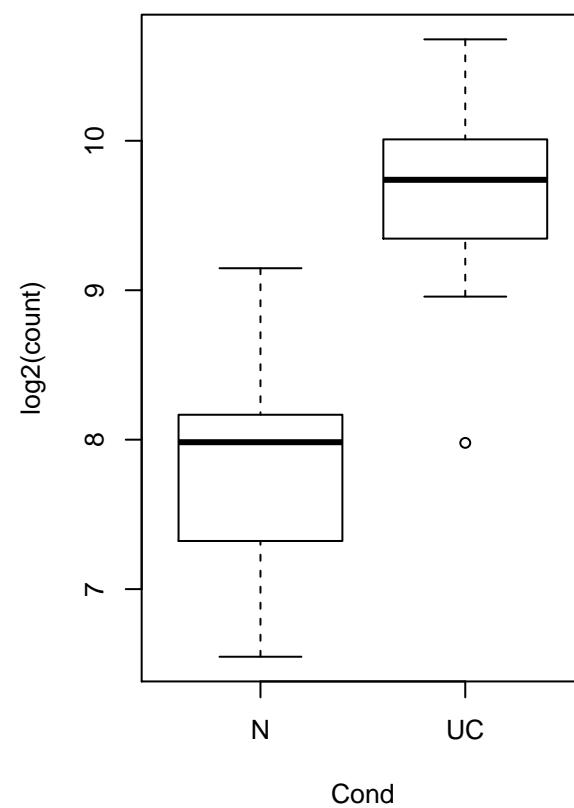

SPOCK2 average UC-N %methylation max=-6.18% min=-22.04%

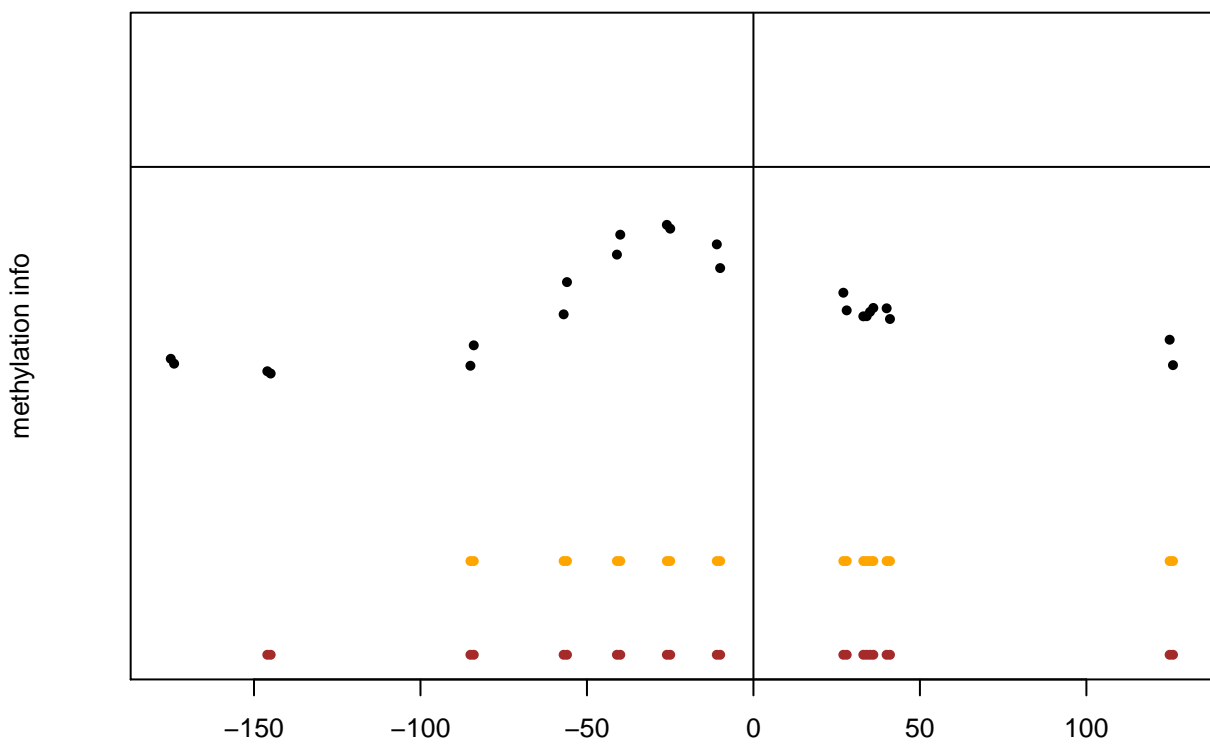

SPOCK2 raw %methylation, red=UC, blue=Normal

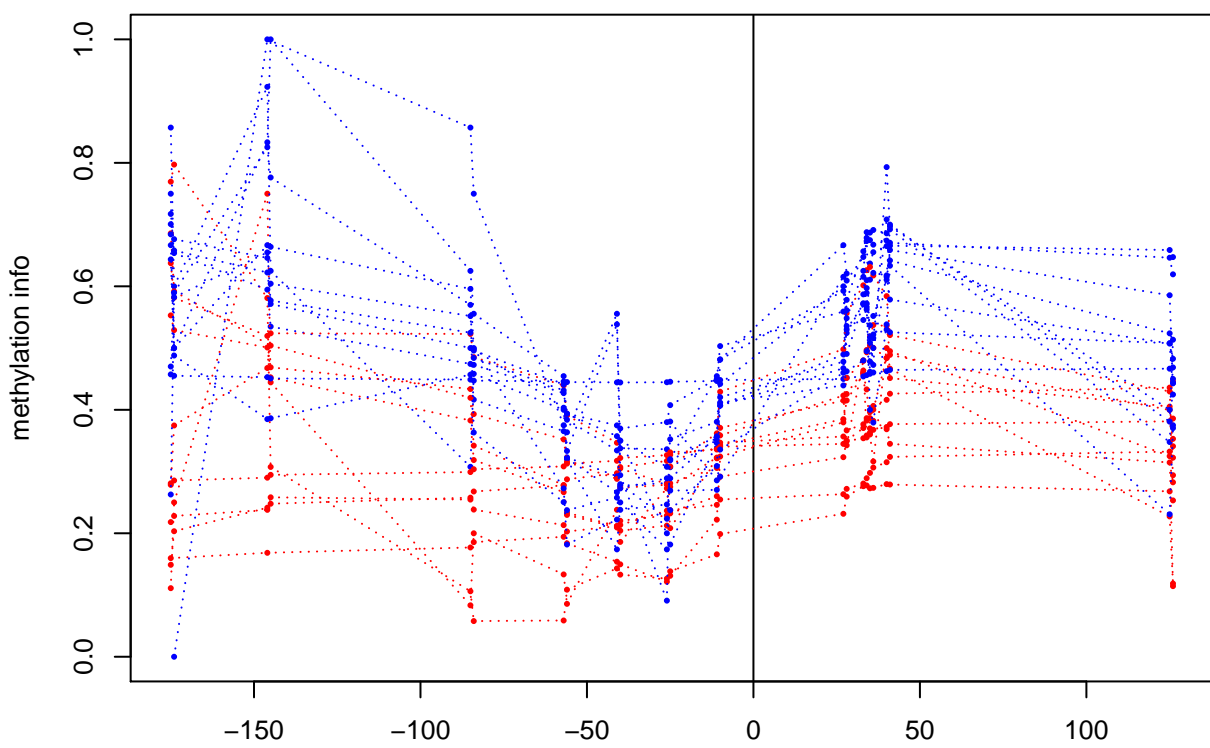

RNAseq logFC(UC-N)= 1.57

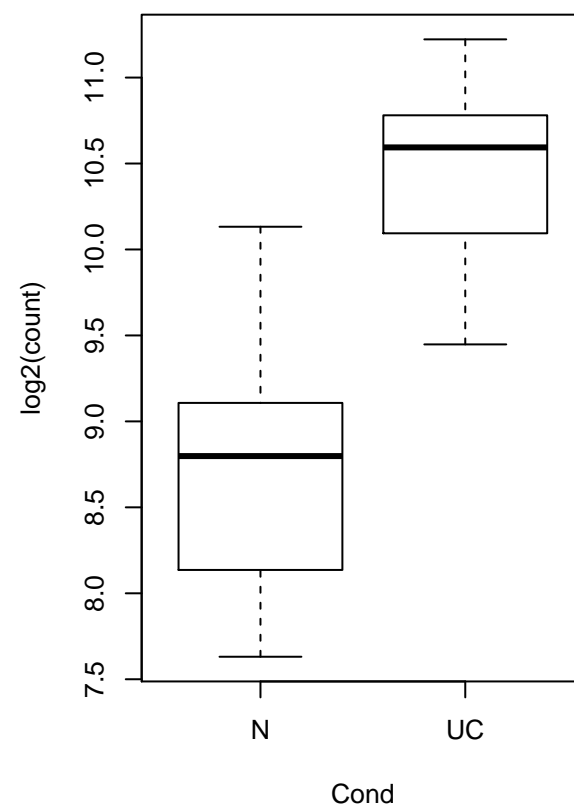

SRGN average UC-N %methylation max=-9.03% min=-50.1%

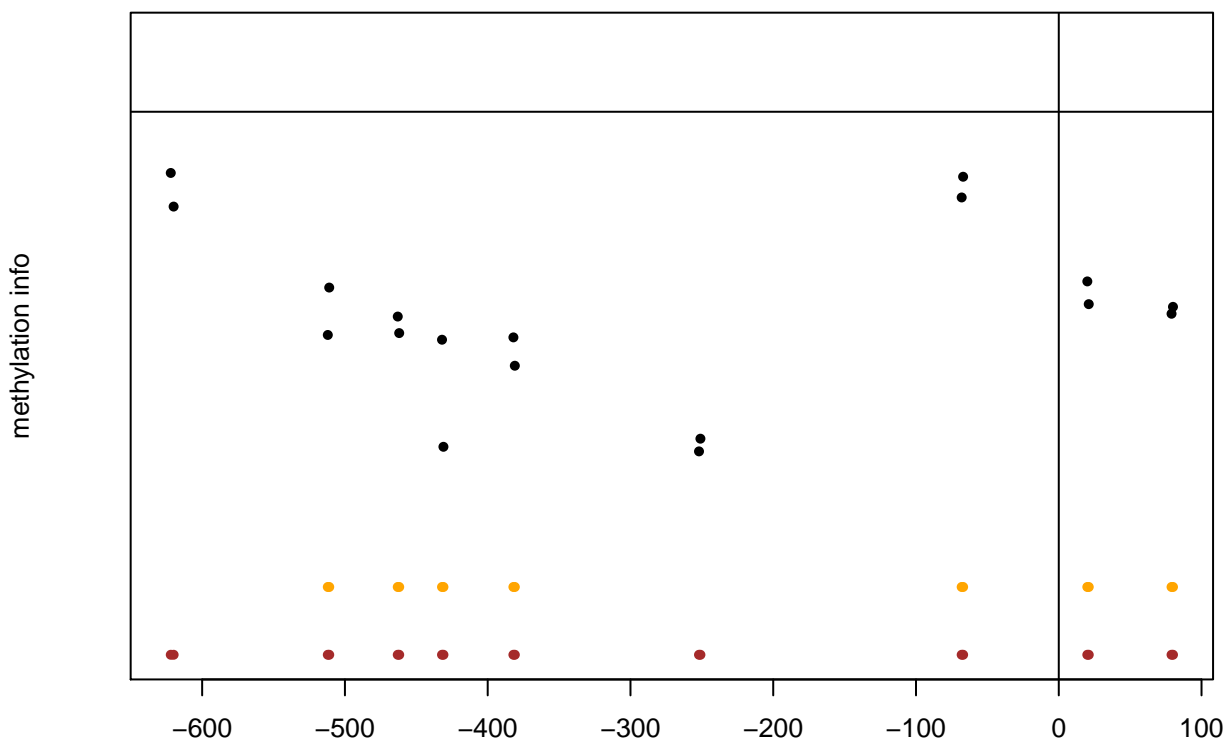

SRGN raw %methylation, red=UC, blue=Normal

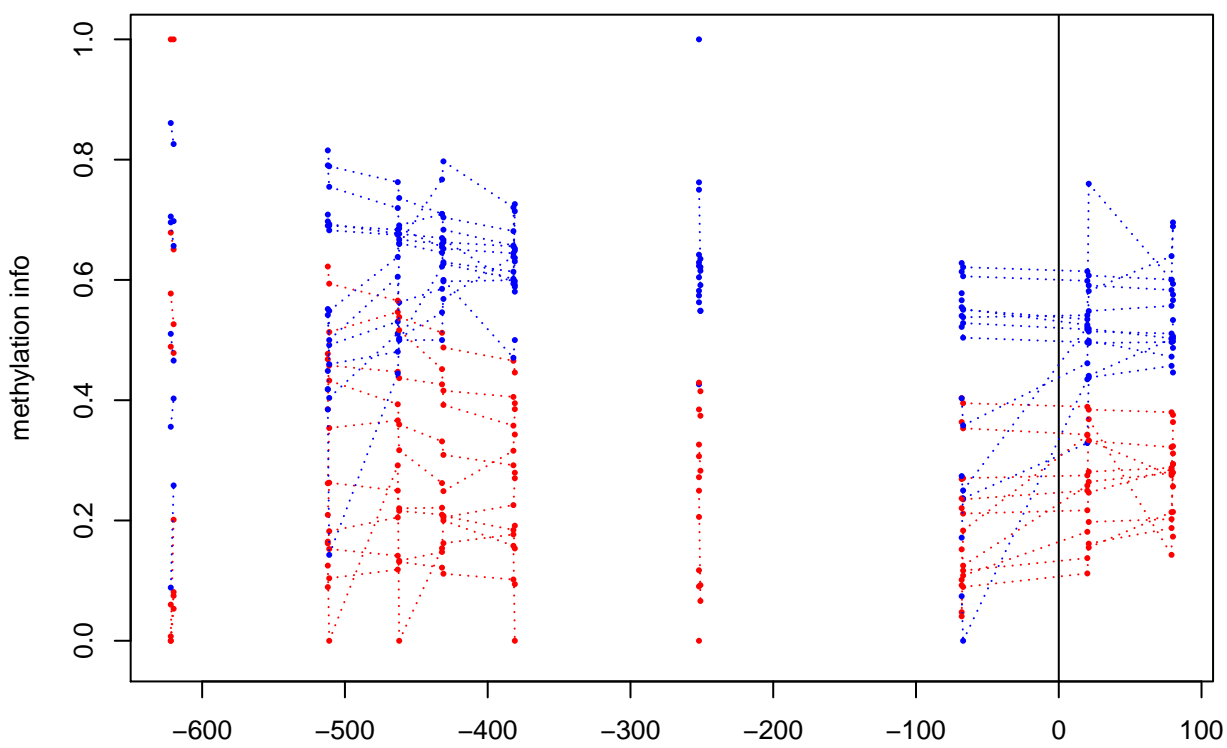

RNAseq logFC(UC-N)= 1.17

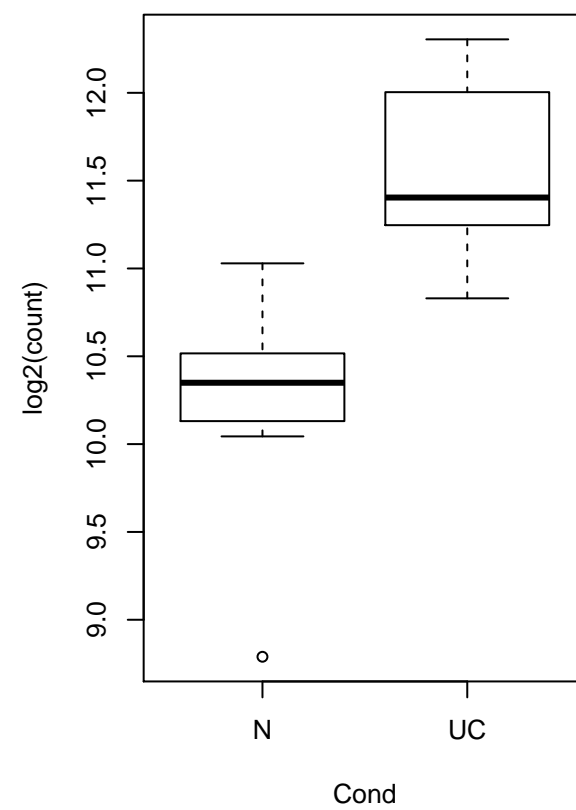

STAP1 average UC-N %methylation max=4.29% min=-29.4%

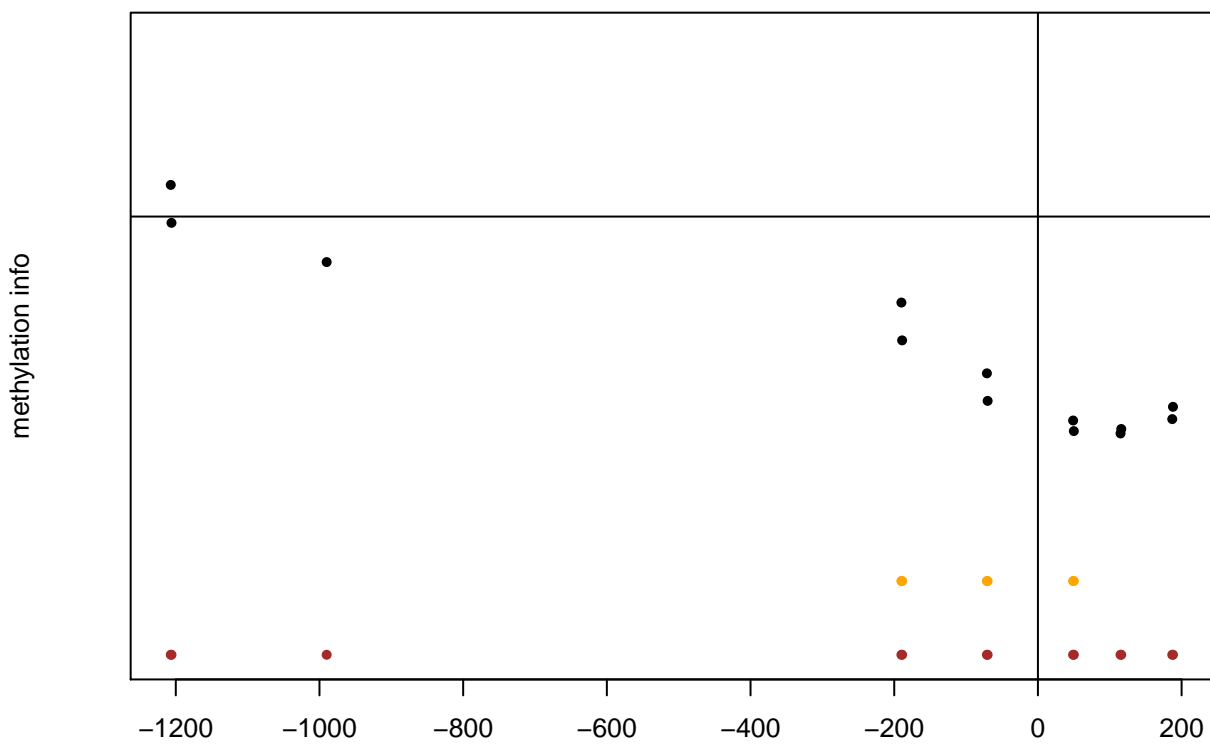

STAP1 raw %methylation, red=UC, blue=Normal

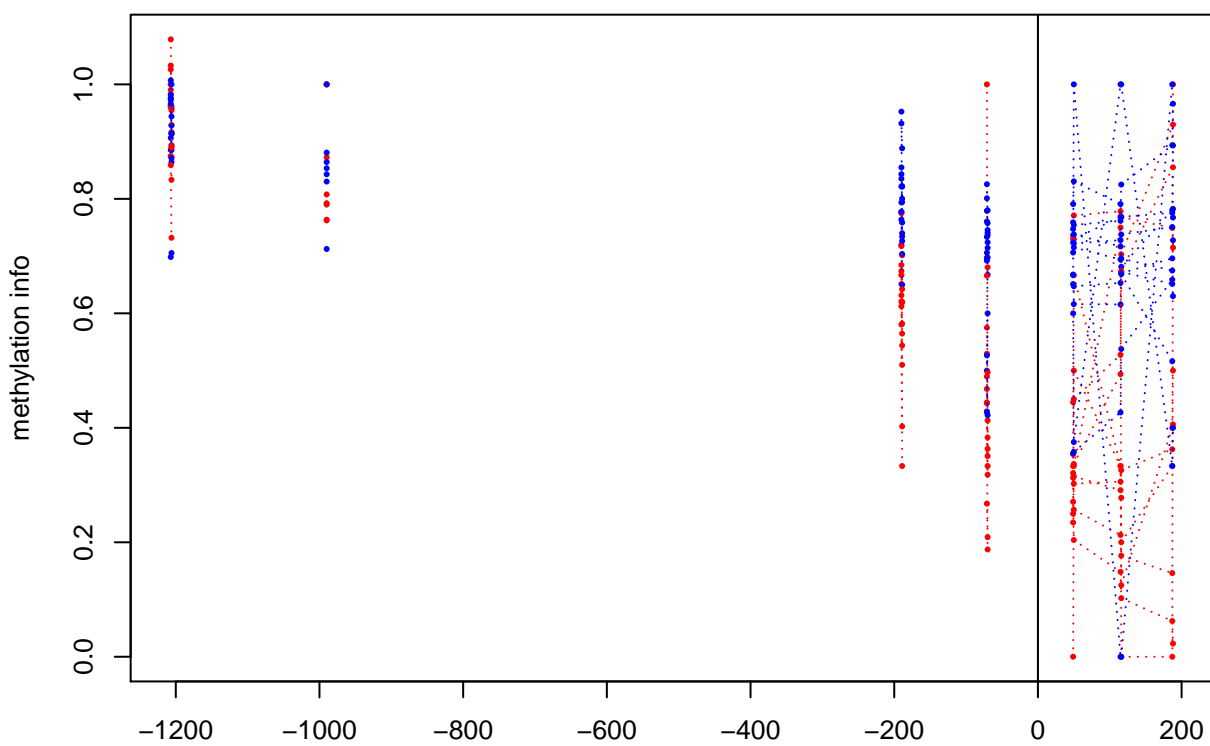

RNAseq logFC(UC-N)= 1.23

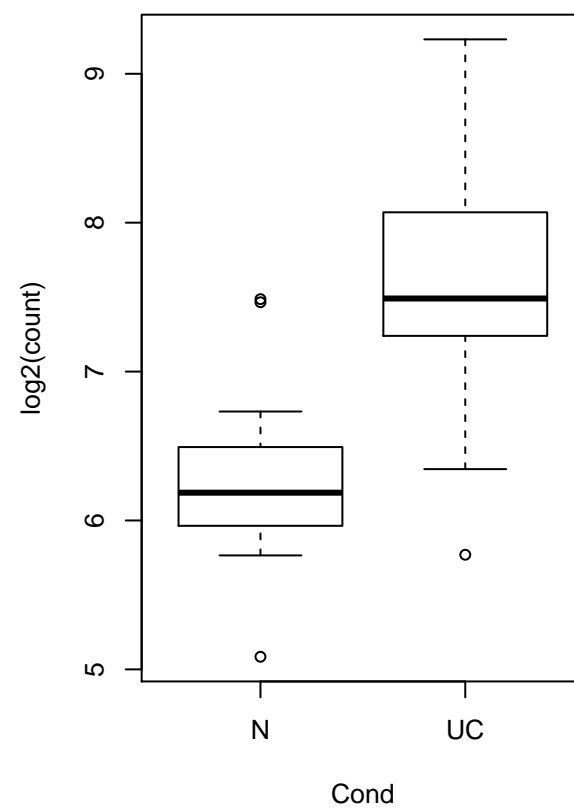

STOM average UC-N %methylation max=5.61% min=-46.58%

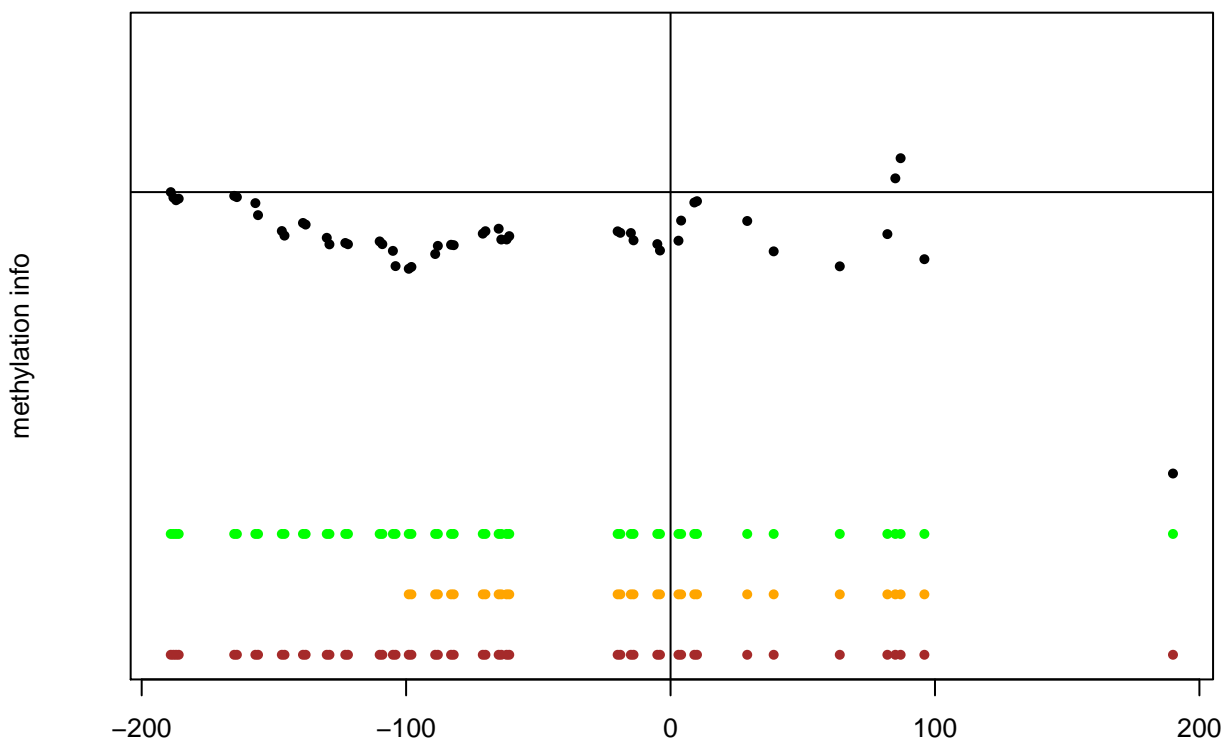

STOM raw %methylation, red=UC, blue=Normal

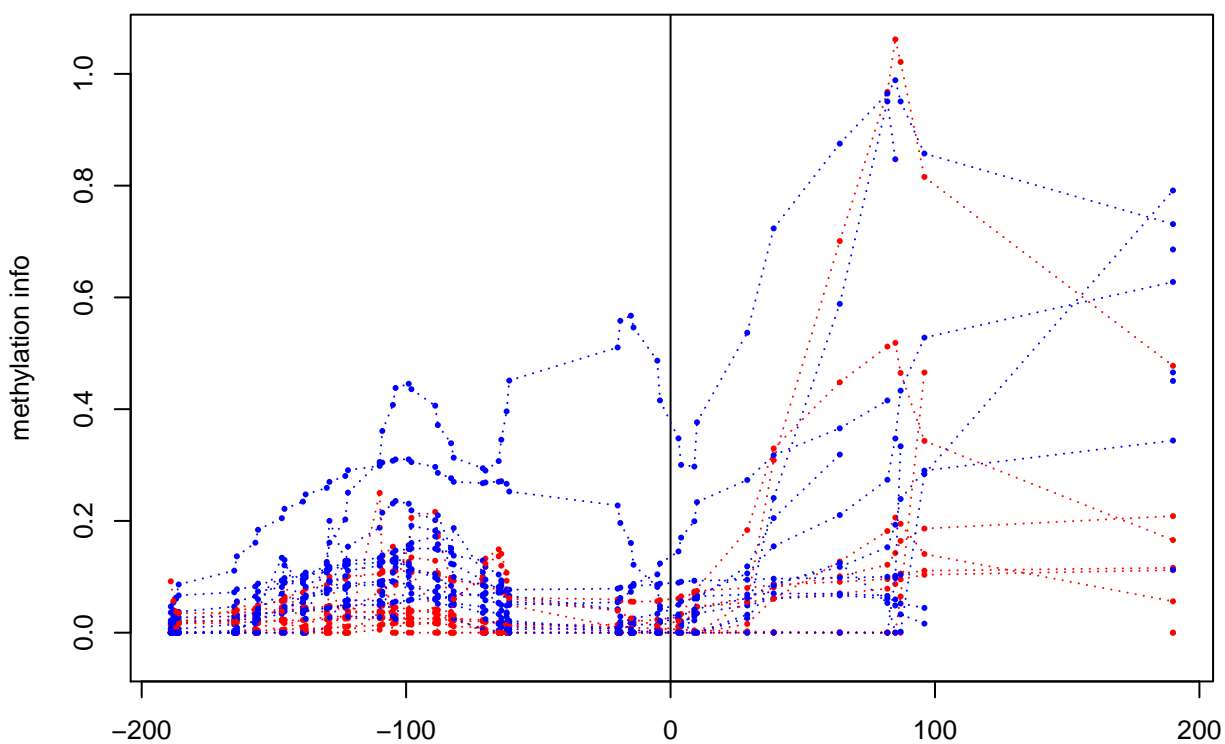

RNAseq logFC(UC-N)= 1.25

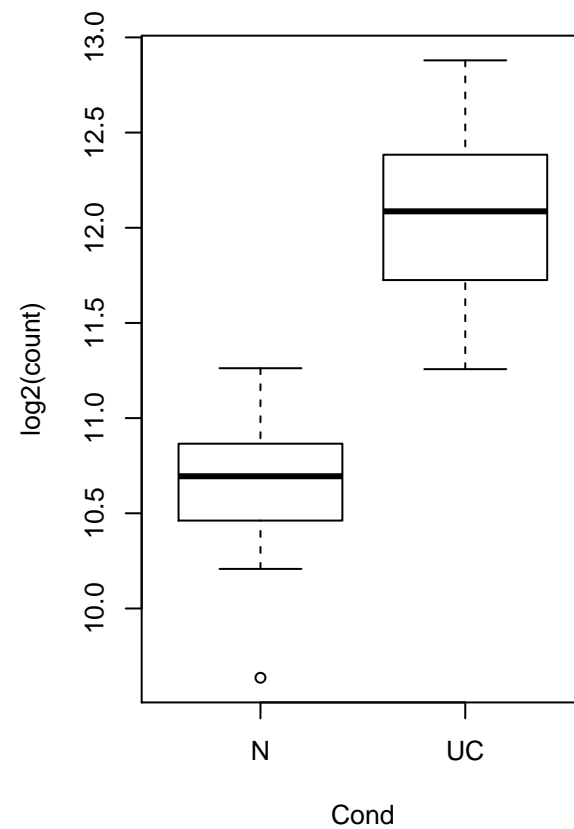

STS average UC-N %methylation max=-3.54% min=-9.53%

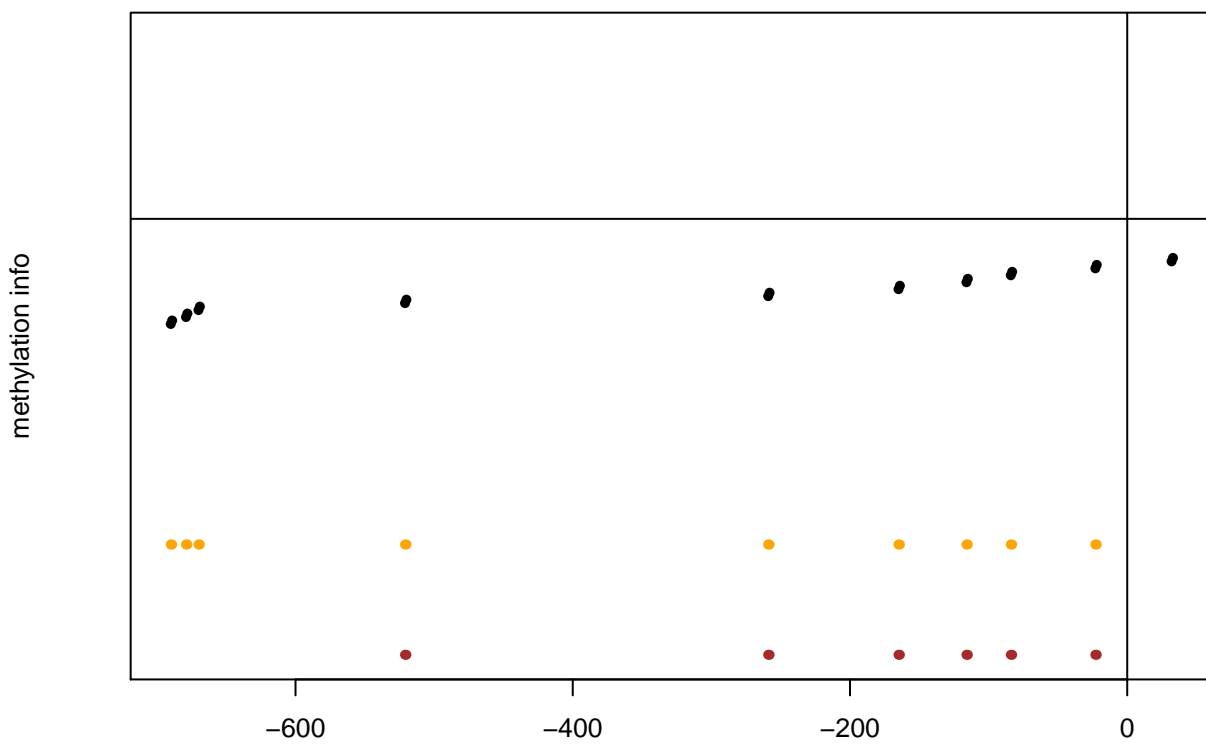

STS raw %methylation, red=UC, blue=Normal

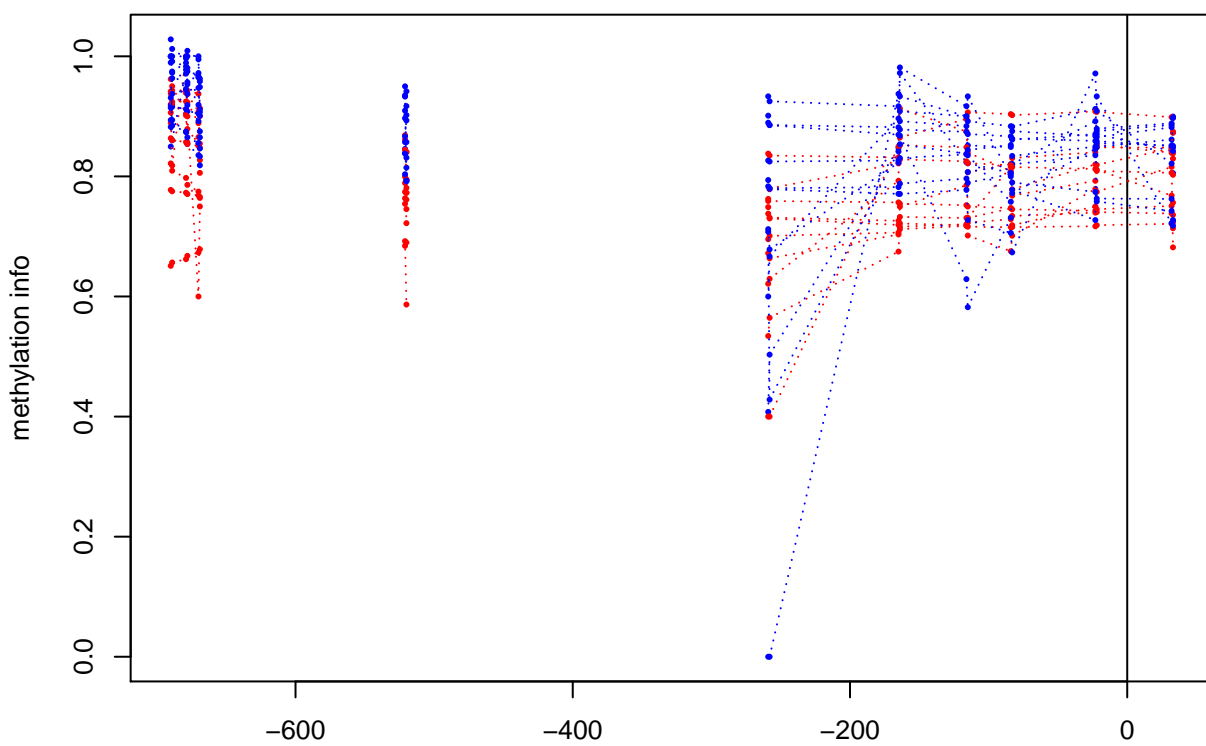

RNAseq logFC(UC-N)= 1.59

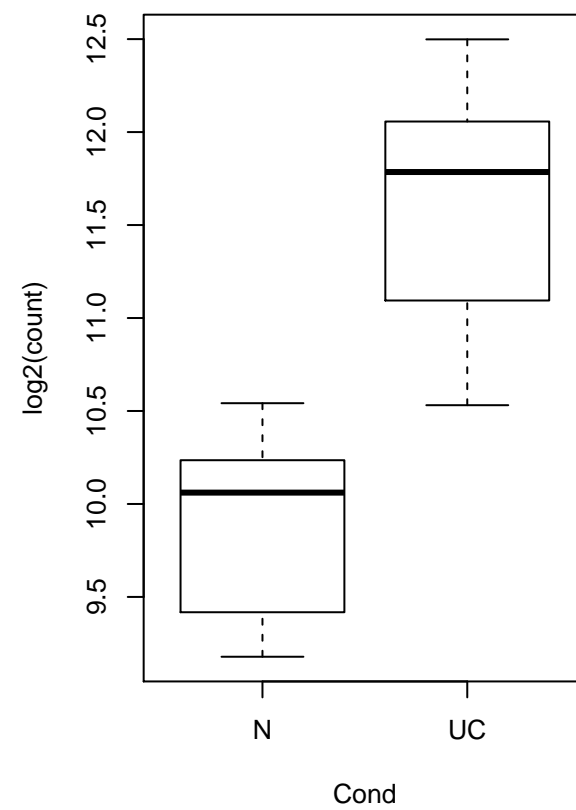

SUCLG2-AS1 average UC-N %methylation max=6.95% min=-1.26%

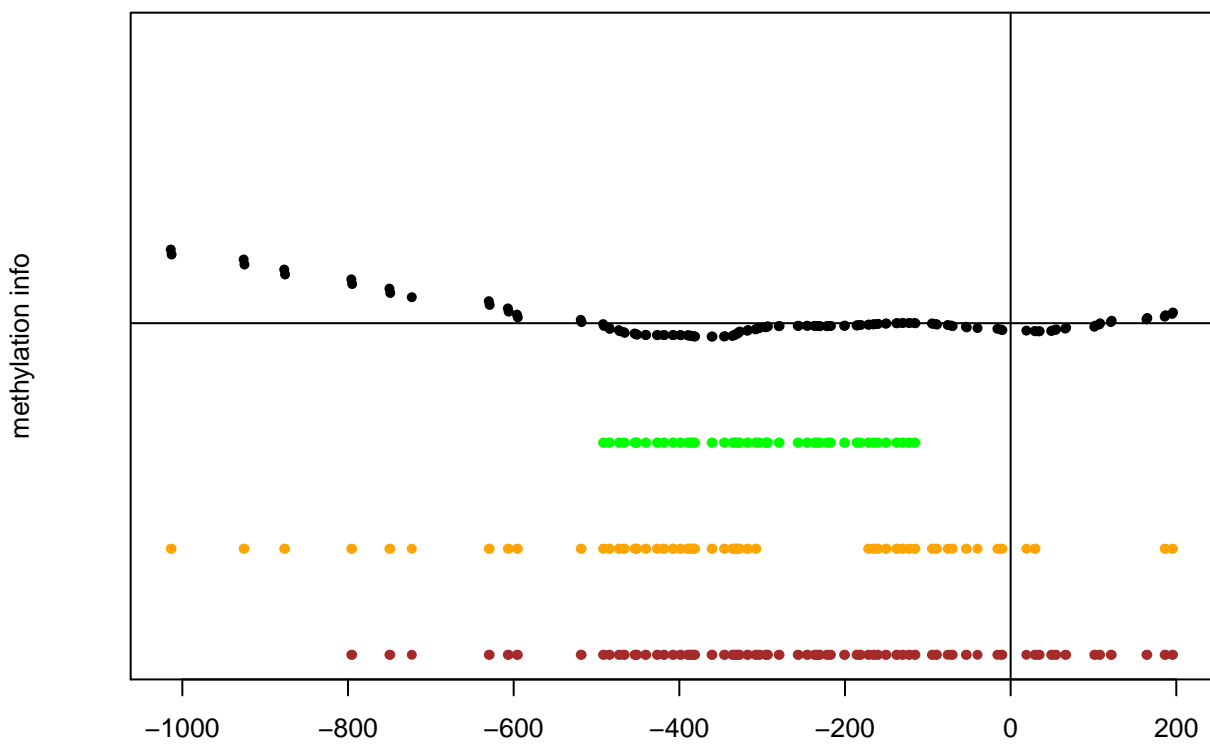

SUCLG2-AS1 raw %methylation, red=UC, blue=Normal

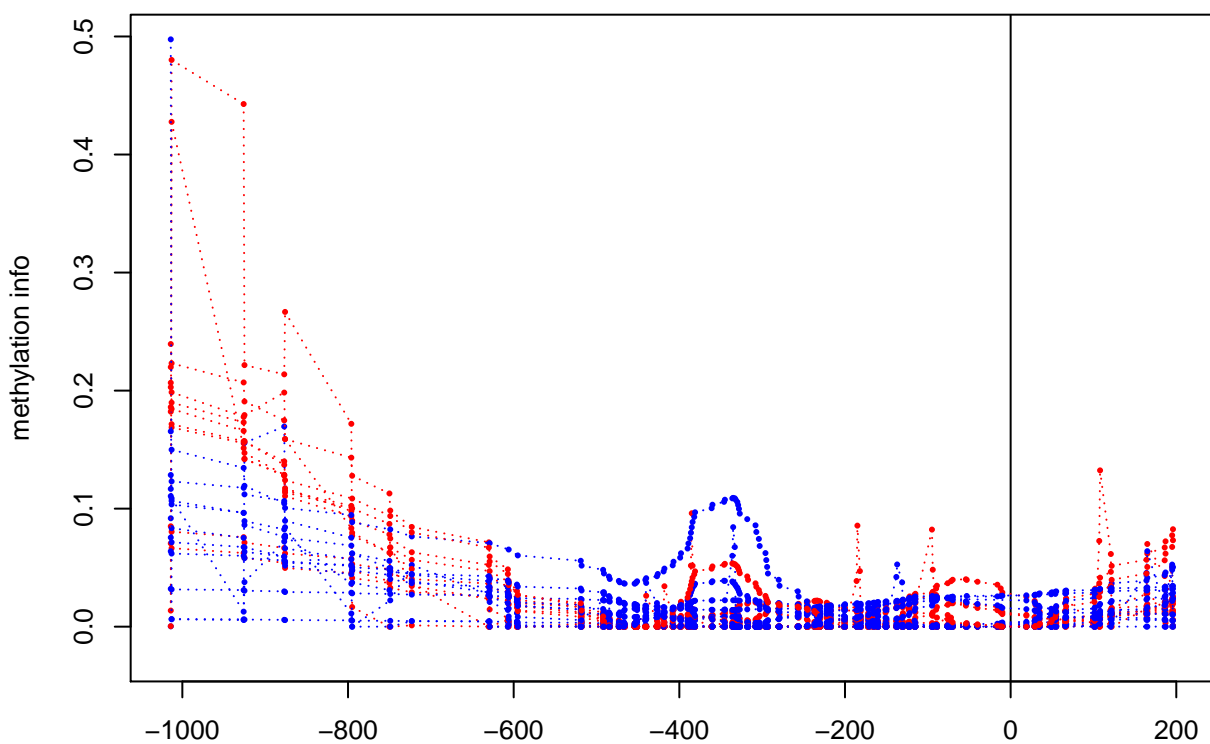

RNAseq logFC(UC-N)= -1.02

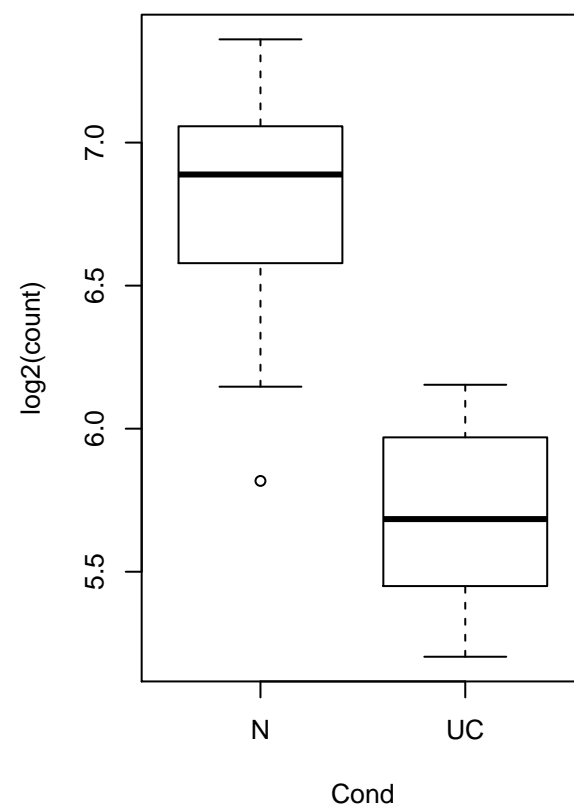



SULT1A2 average UC-N %methylation max=20.45% min=5.83%

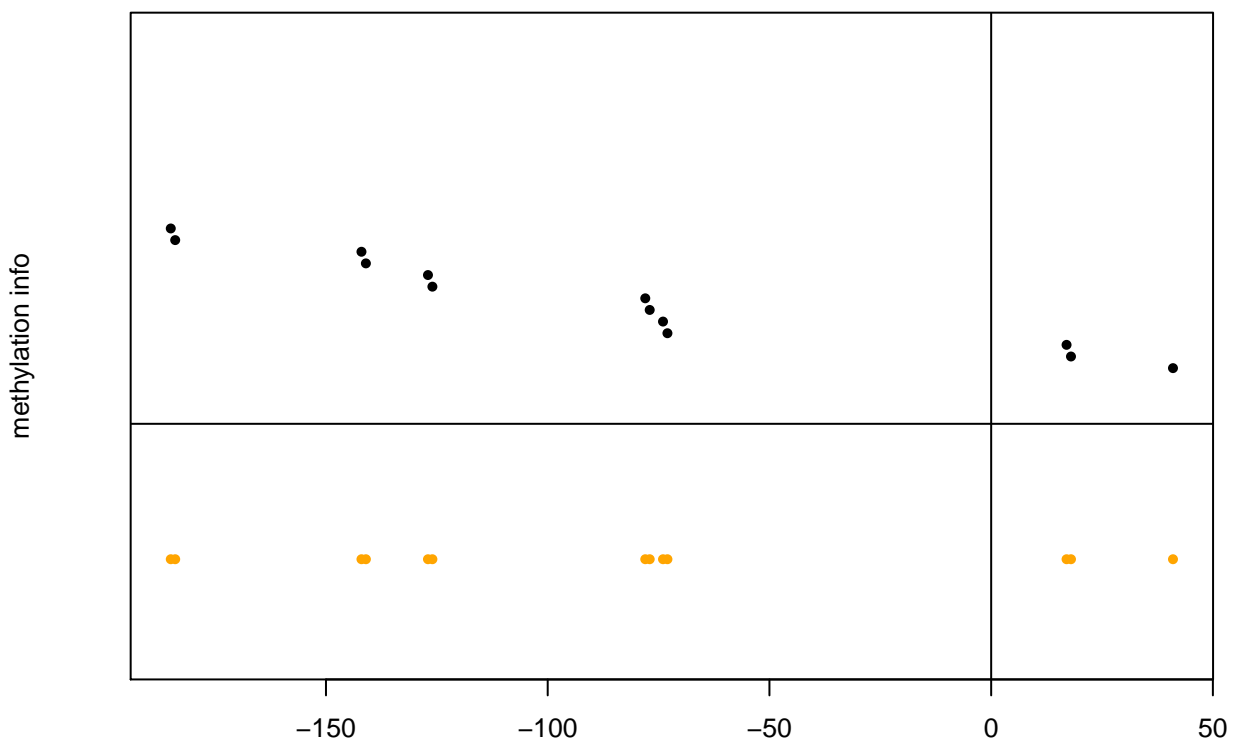

SULT1A2 raw %methylation, red=UC, blue=Normal

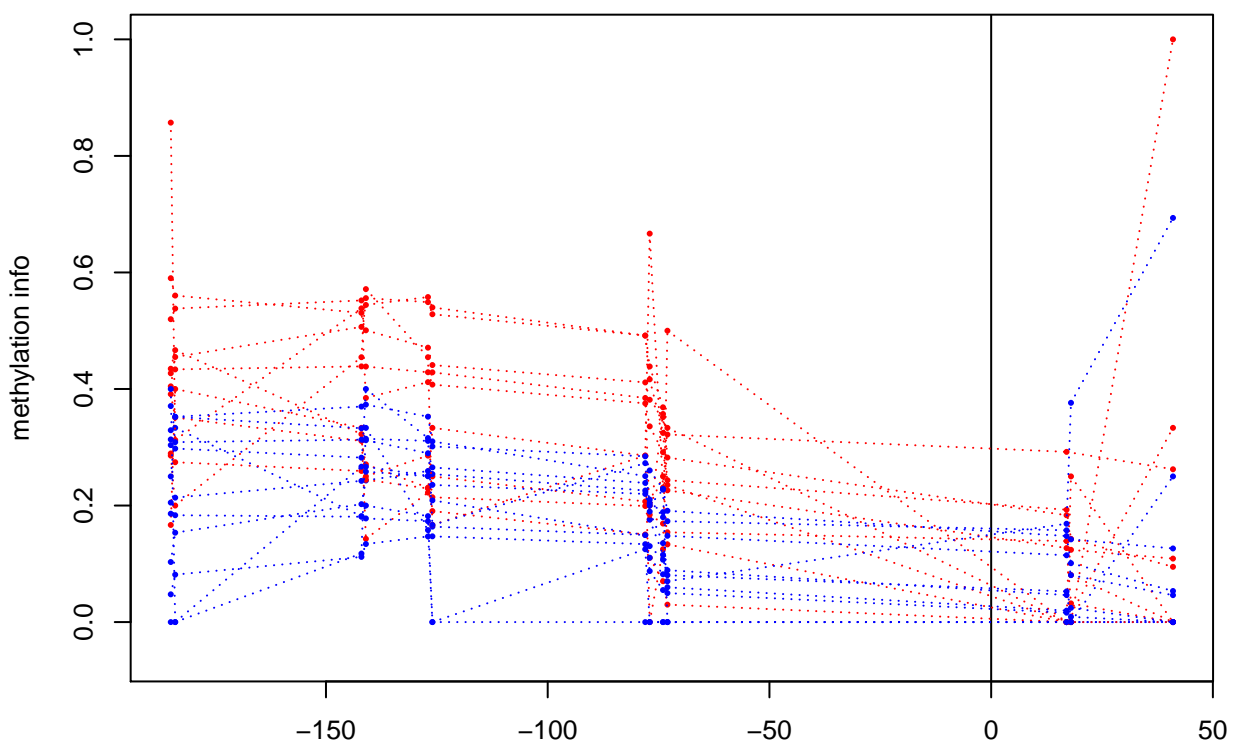

RNAseq logFC(UC-N) = -1.67

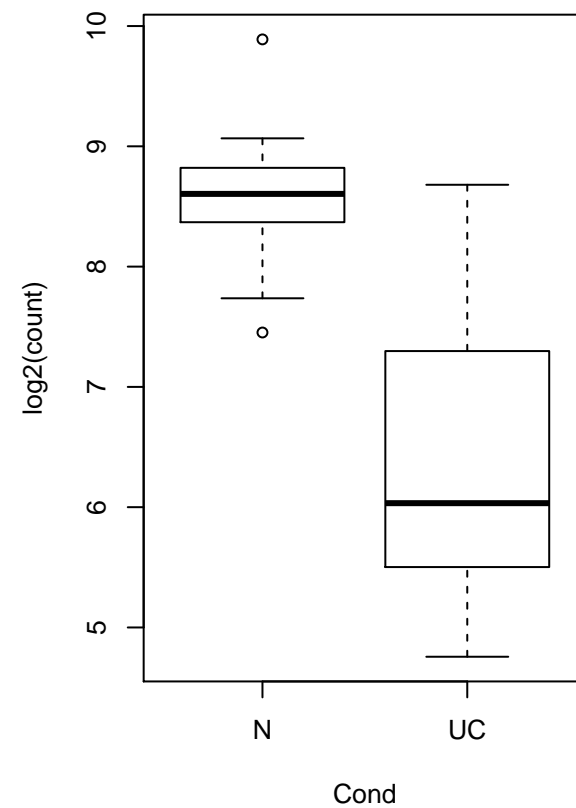

**SYTL1 average UC-N %methylation max=-0.09% min=-32.91%**

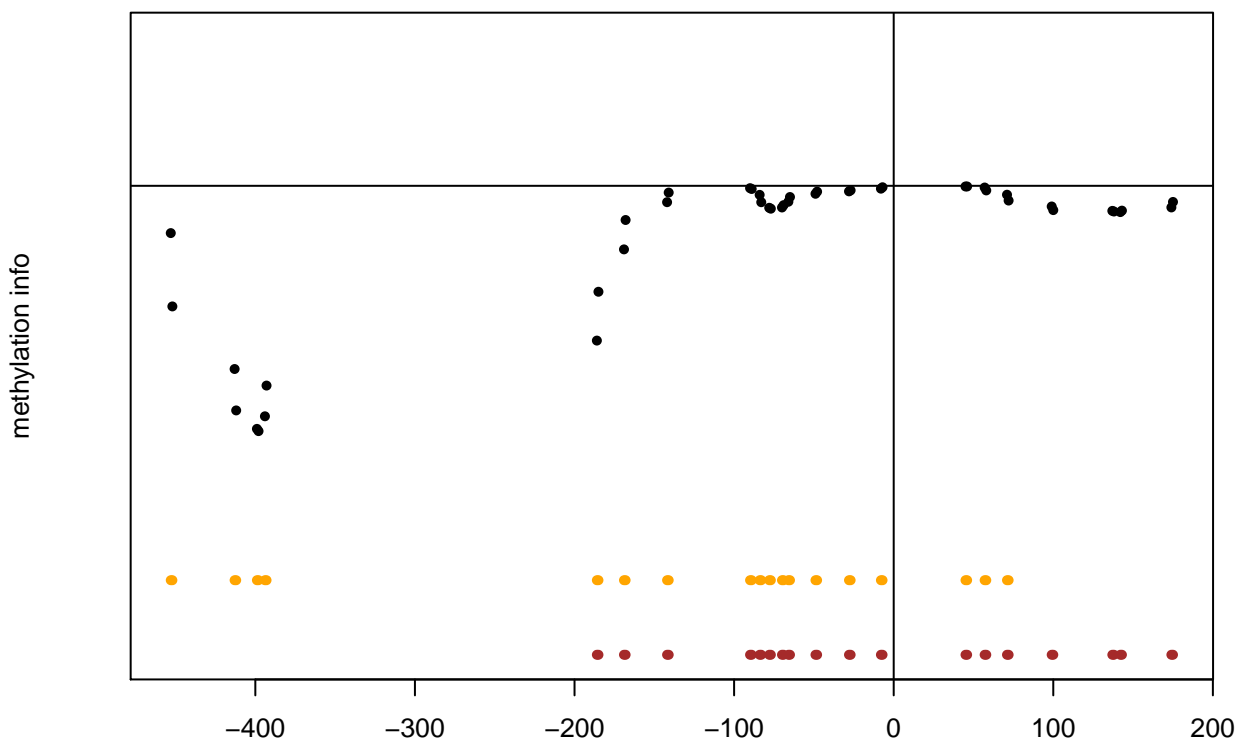

**SYTL1 raw %methylation, red=UC, blue=Normal**

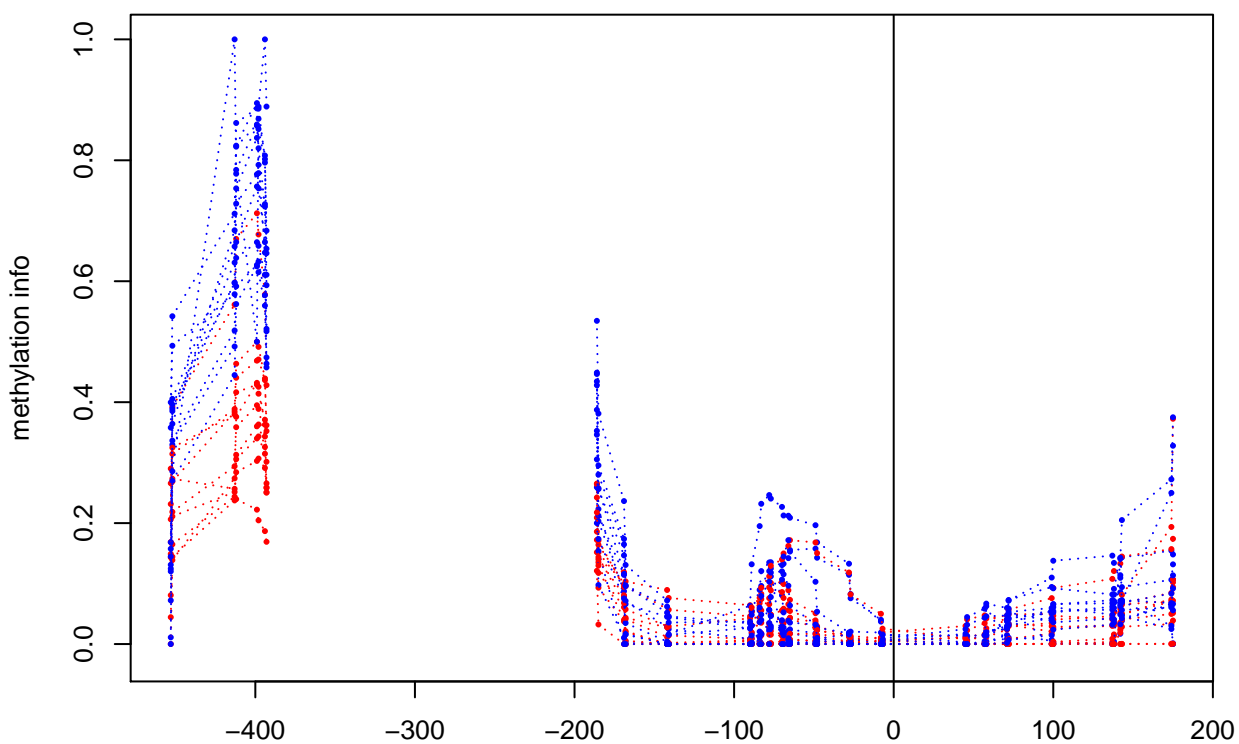

**RNAseq logFC(UC-N)= 1.37**

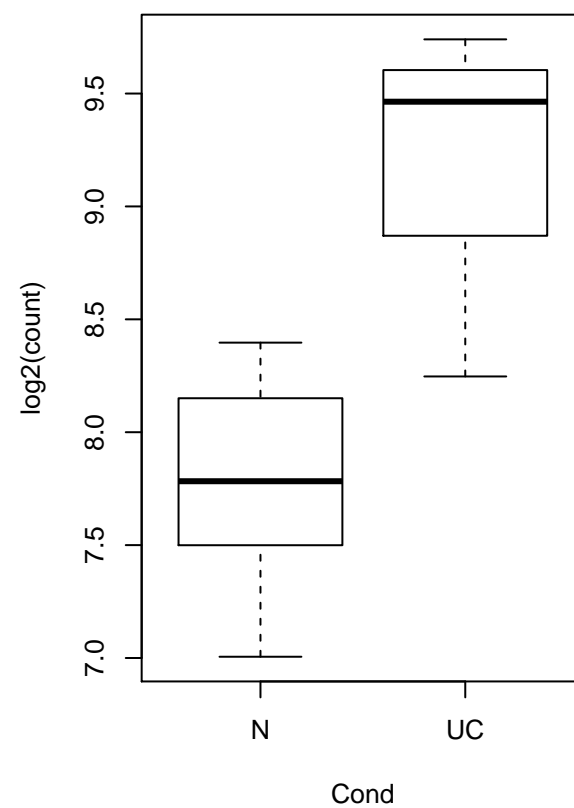

TBC1D10C average UC-N %methylation max=-20.1% min=-41.27%

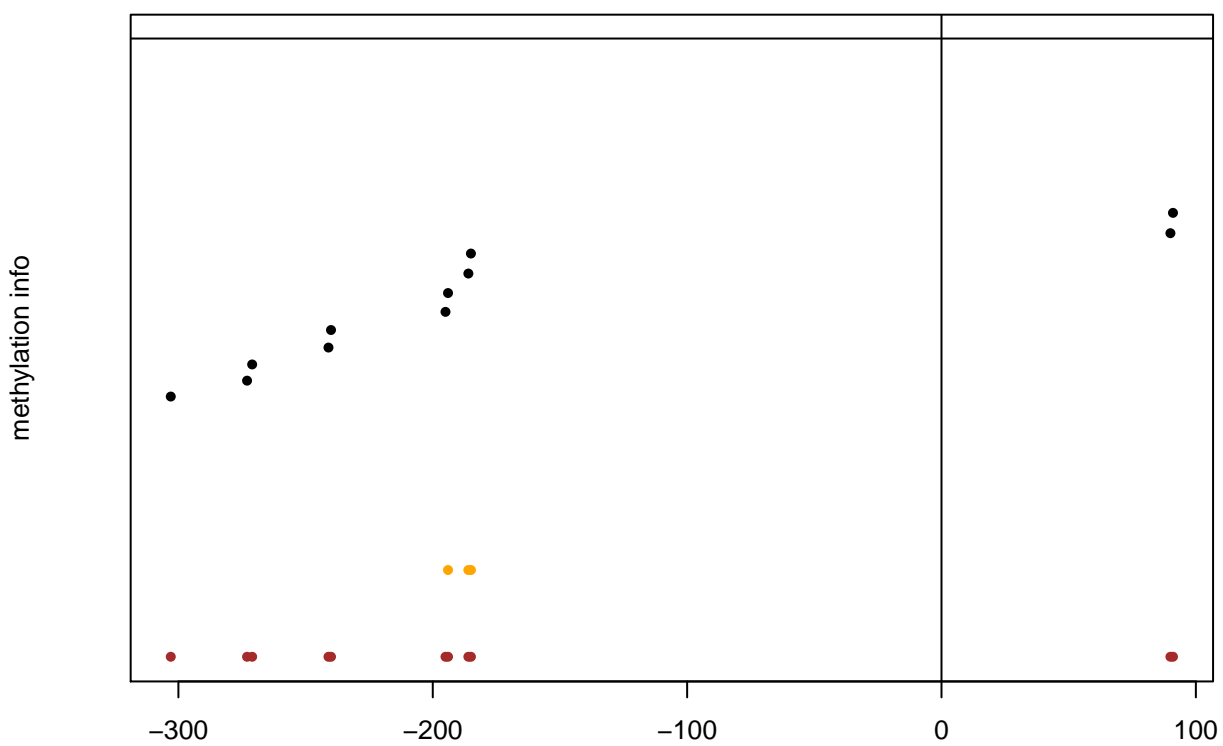

TBC1D10C raw %methylation, red=UC, blue=Normal

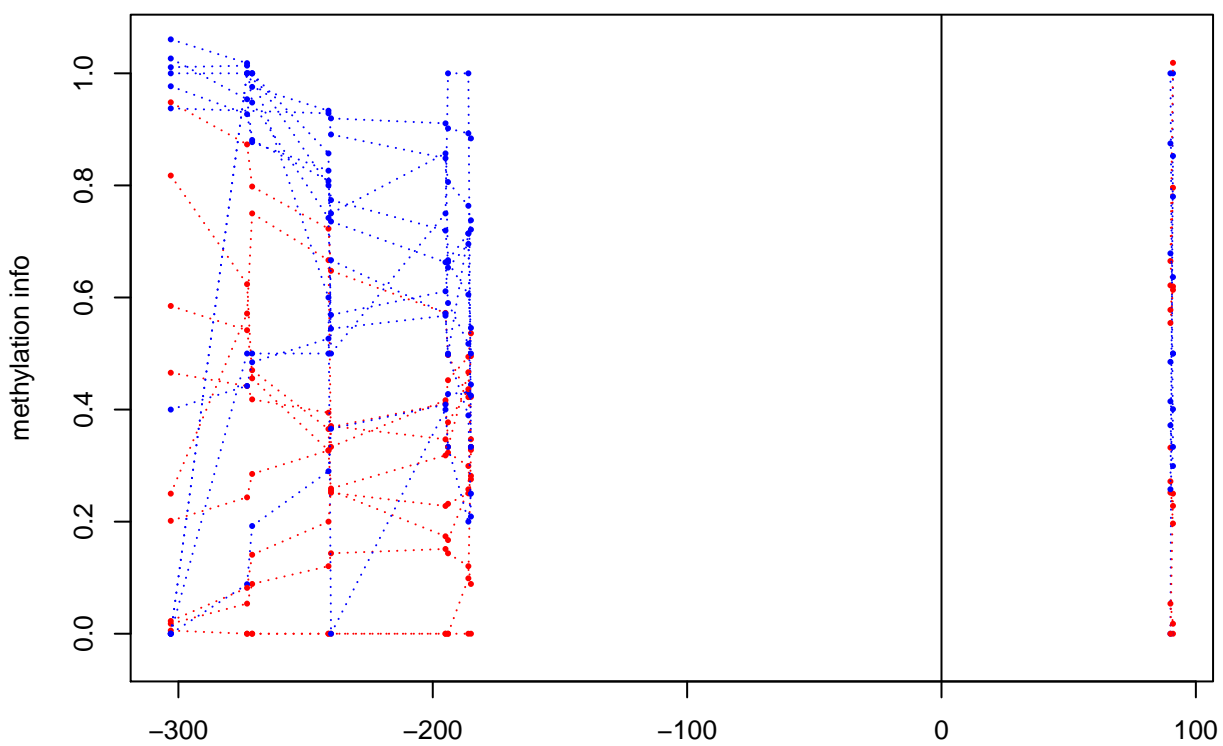

RNAseq logFC(UC-N)= 1.46

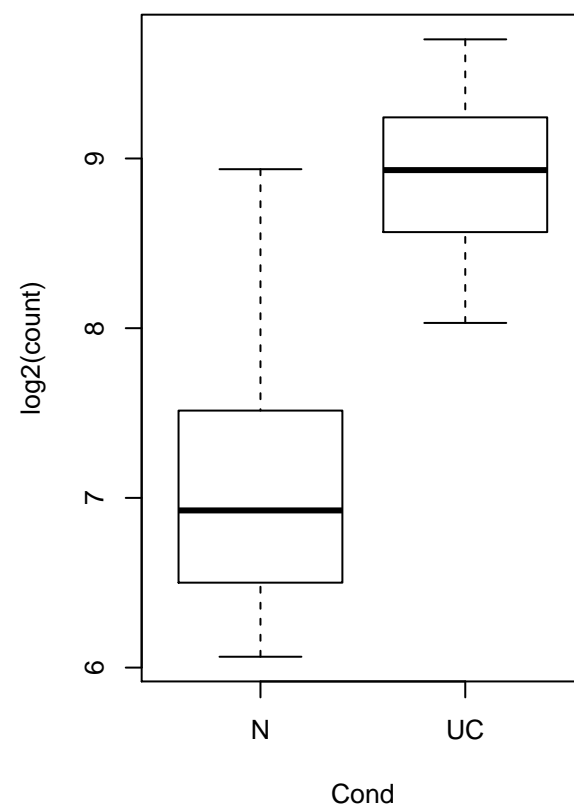

TBX21 average UC-N %methylation max=7.23% min=-26.94%

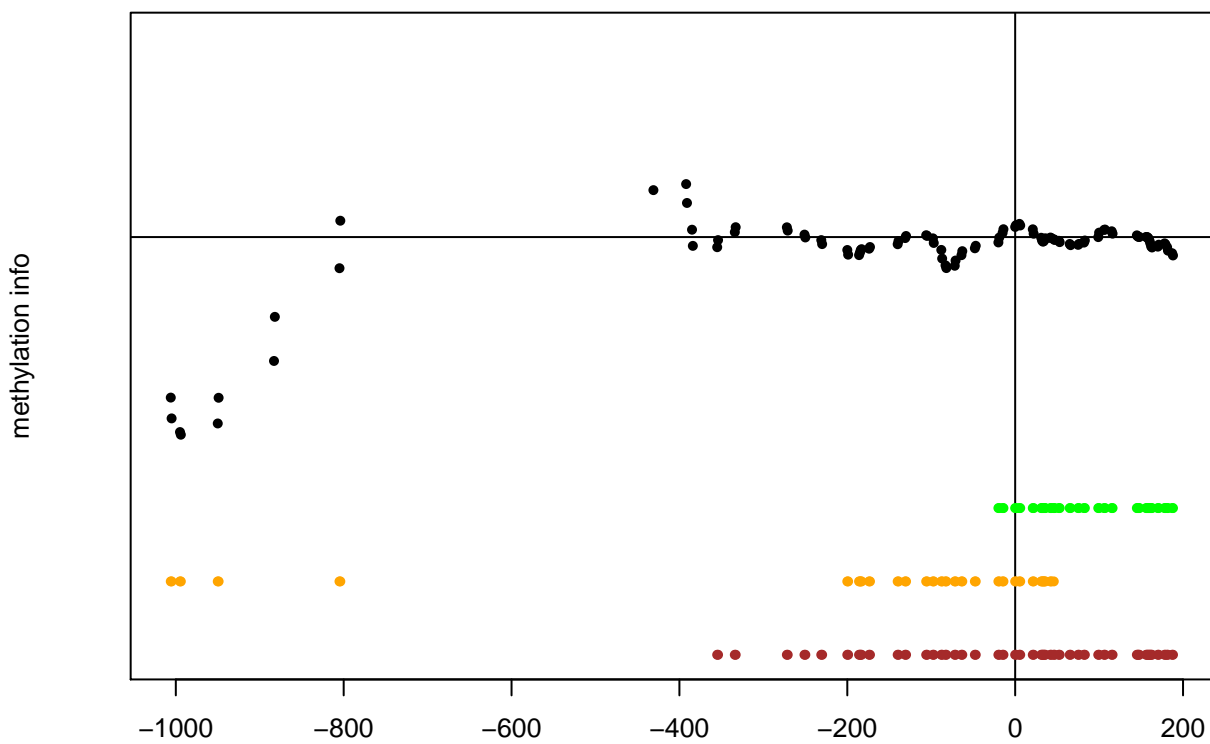

TBX21 raw %methylation, red=UC, blue=Normal

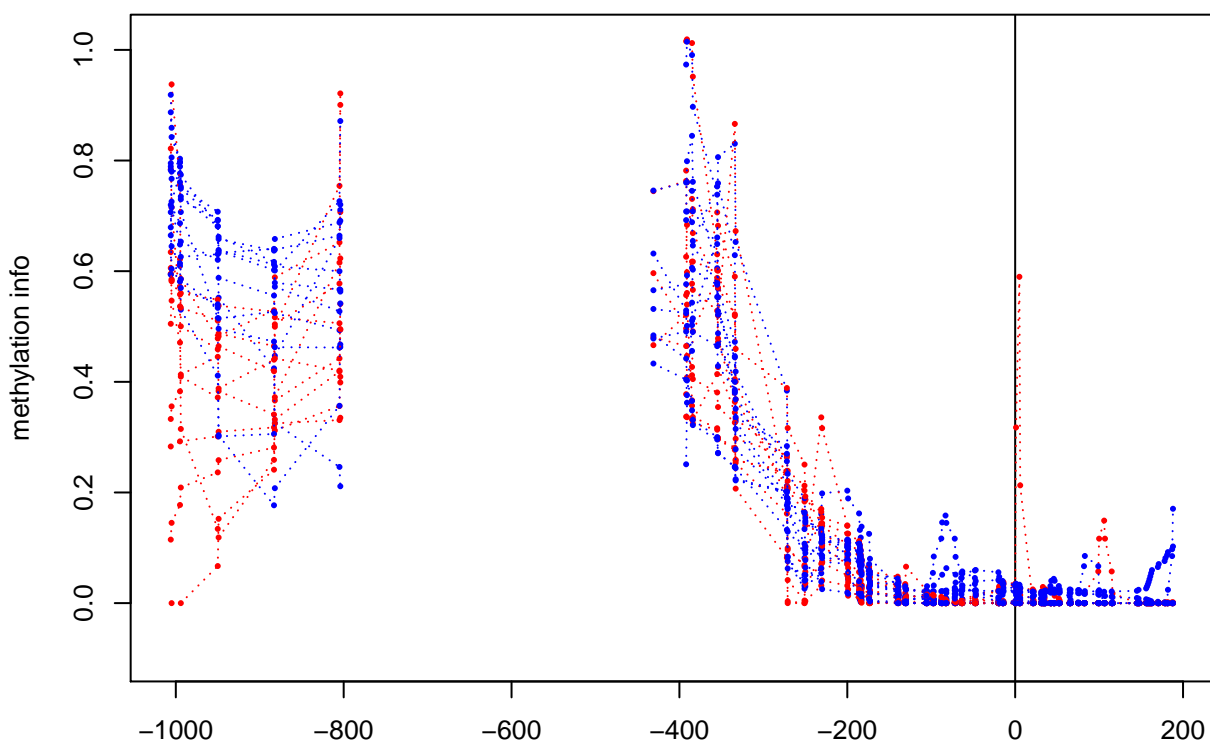

RNAseq logFC(UC-N)= 1.6

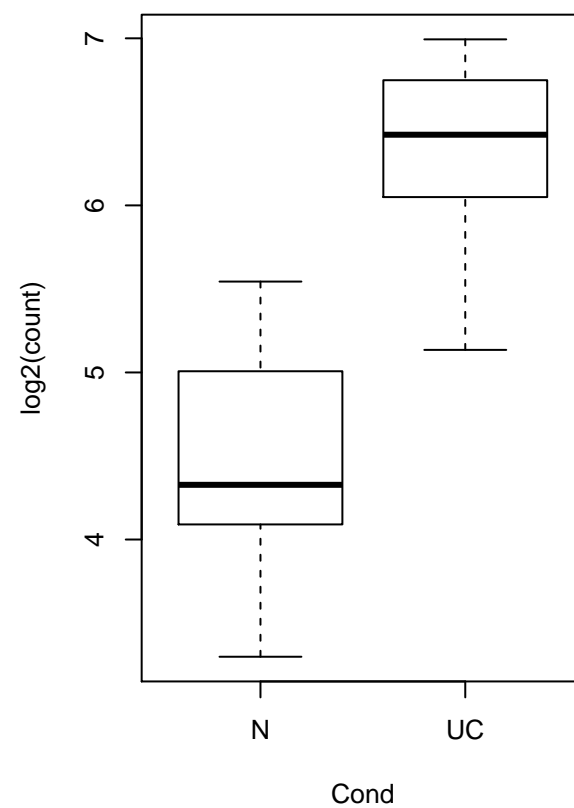

TCL1A average UC-N %methylation max=-3.81% min=-35.15%

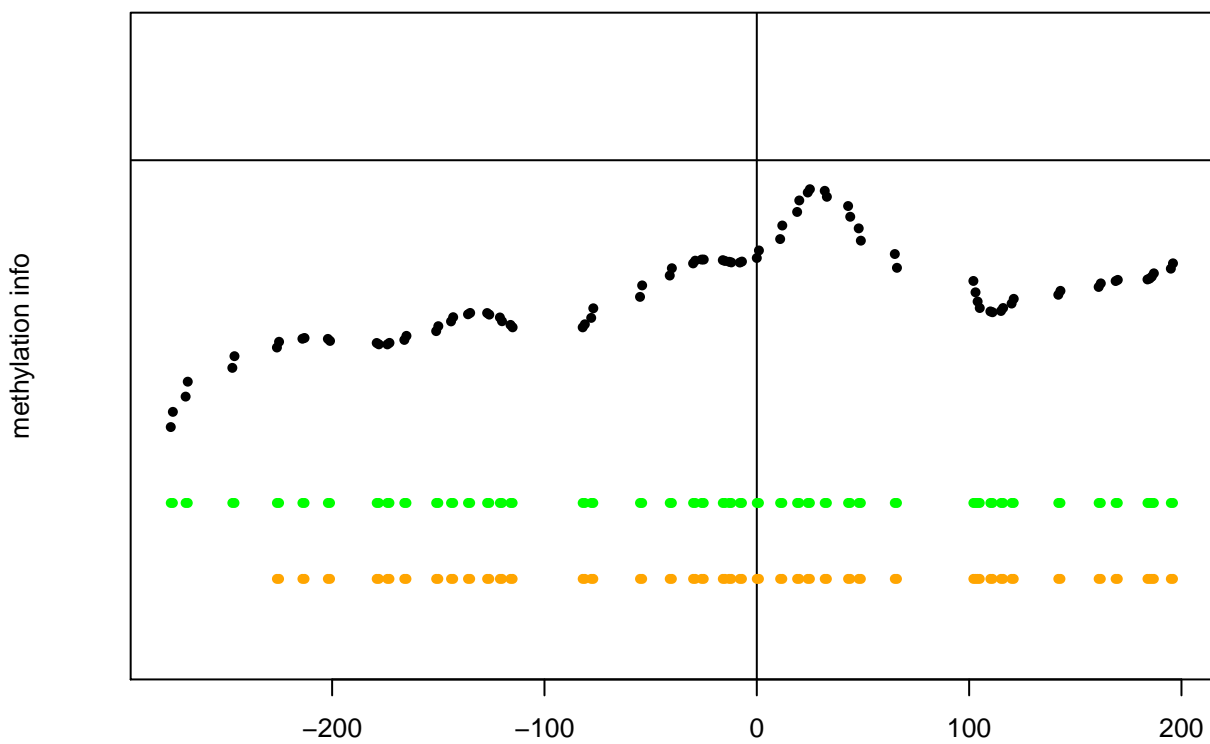

TCL1A raw %methylation, red=UC, blue=Normal

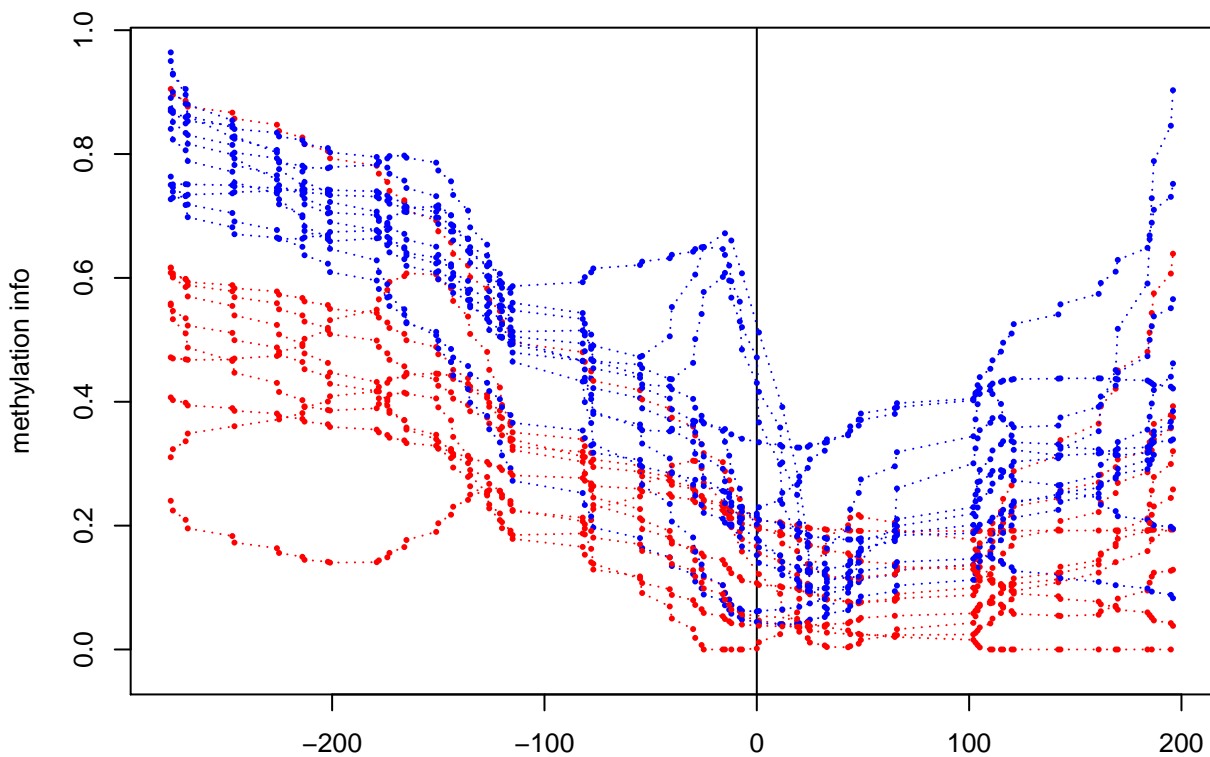

RNAseq logFC(UC-N)= 2

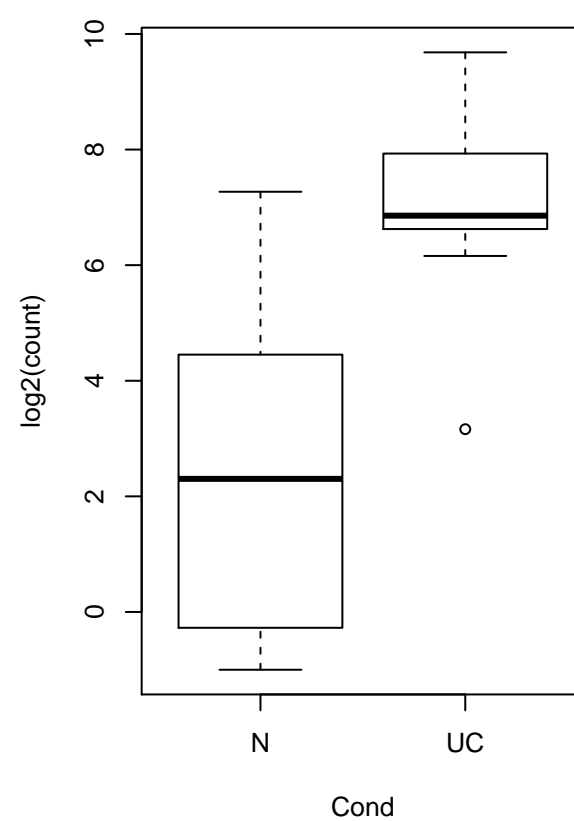

TCN1 average UC-N %methylation max=-10.67% min=-38.92%

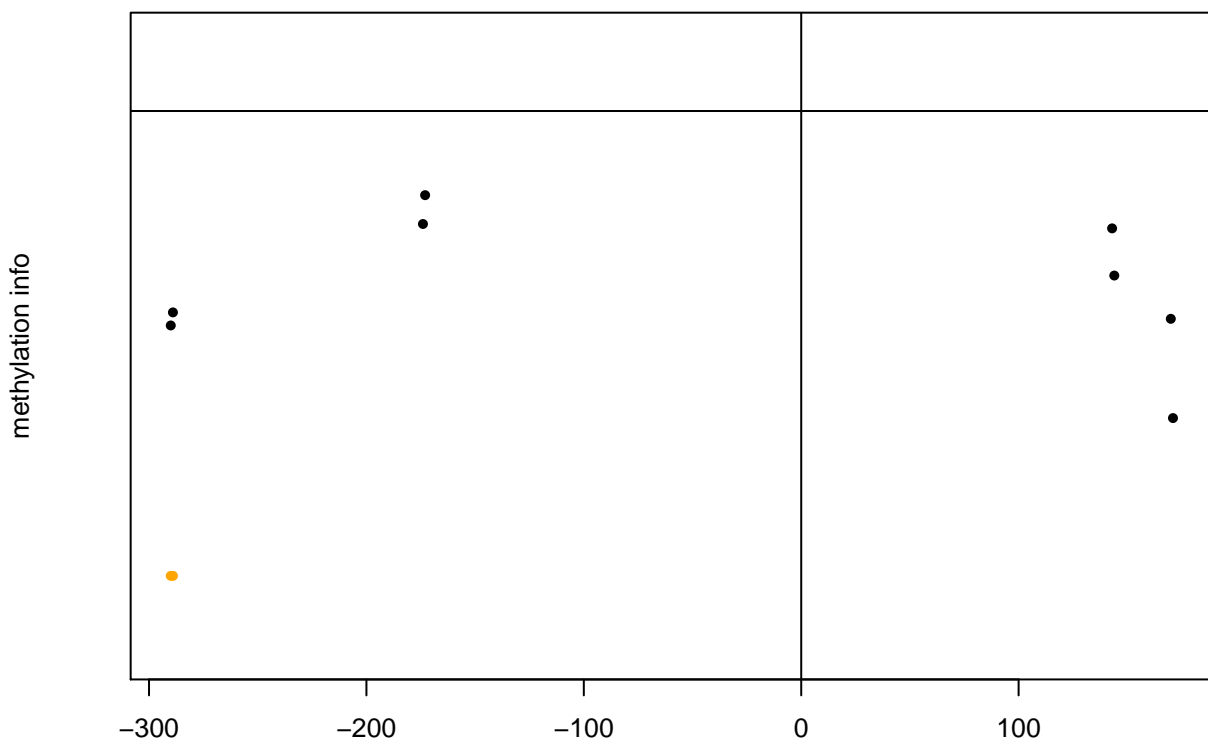

TCN1 raw %methylation, red=UC, blue=Normal

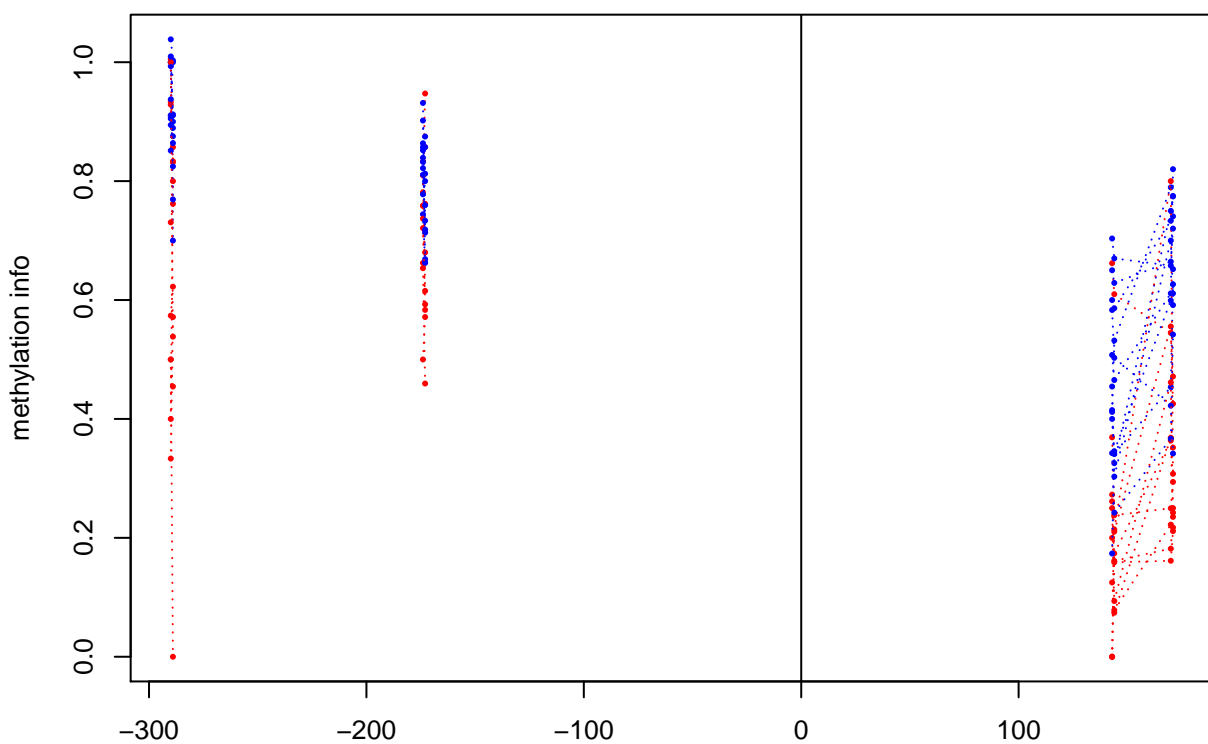

RNAseq logFC(UC-N)= 2.96

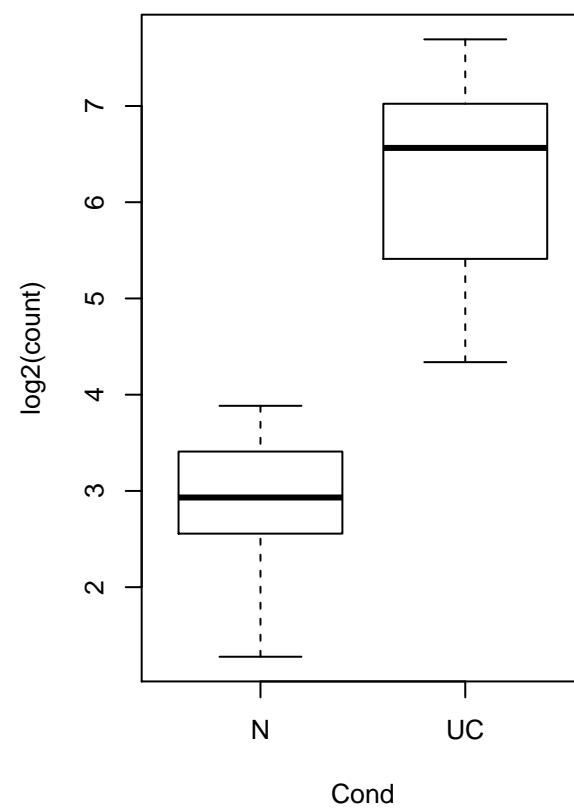

TFPI2 average UC-N %methylation max=1.11% min=-4.76%

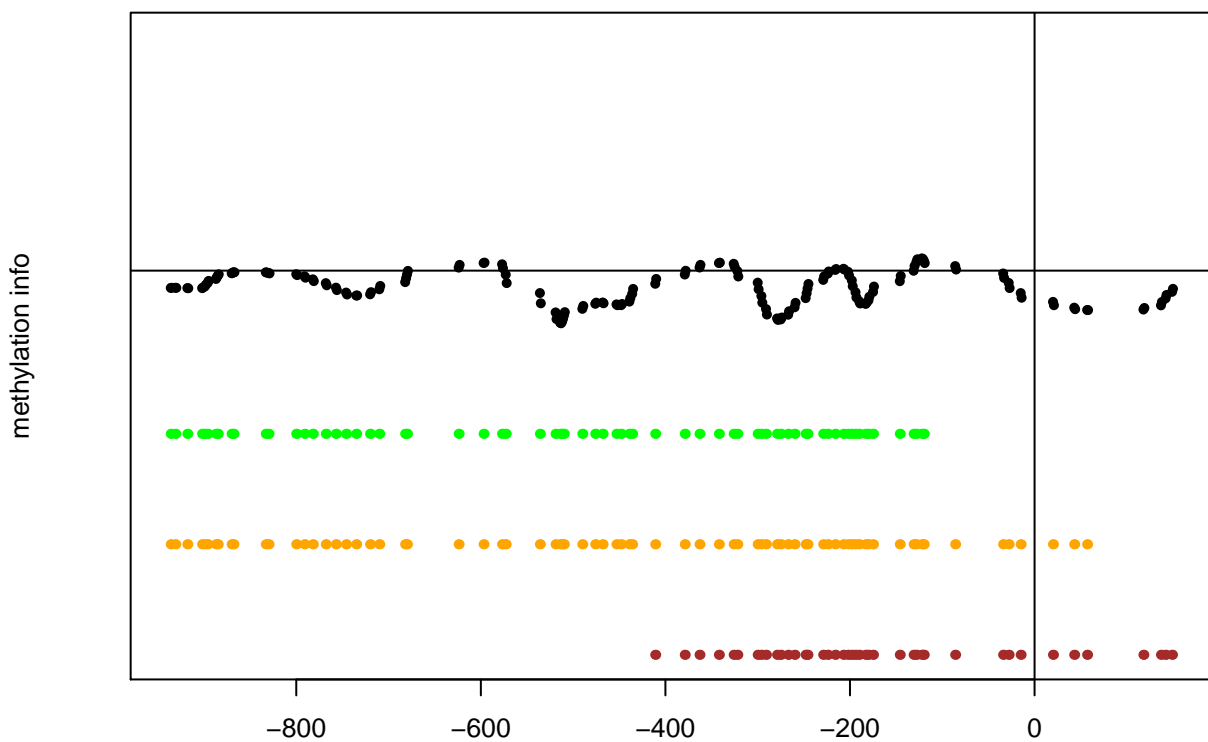

TFPI2 raw %methylation, red=UC, blue=Normal

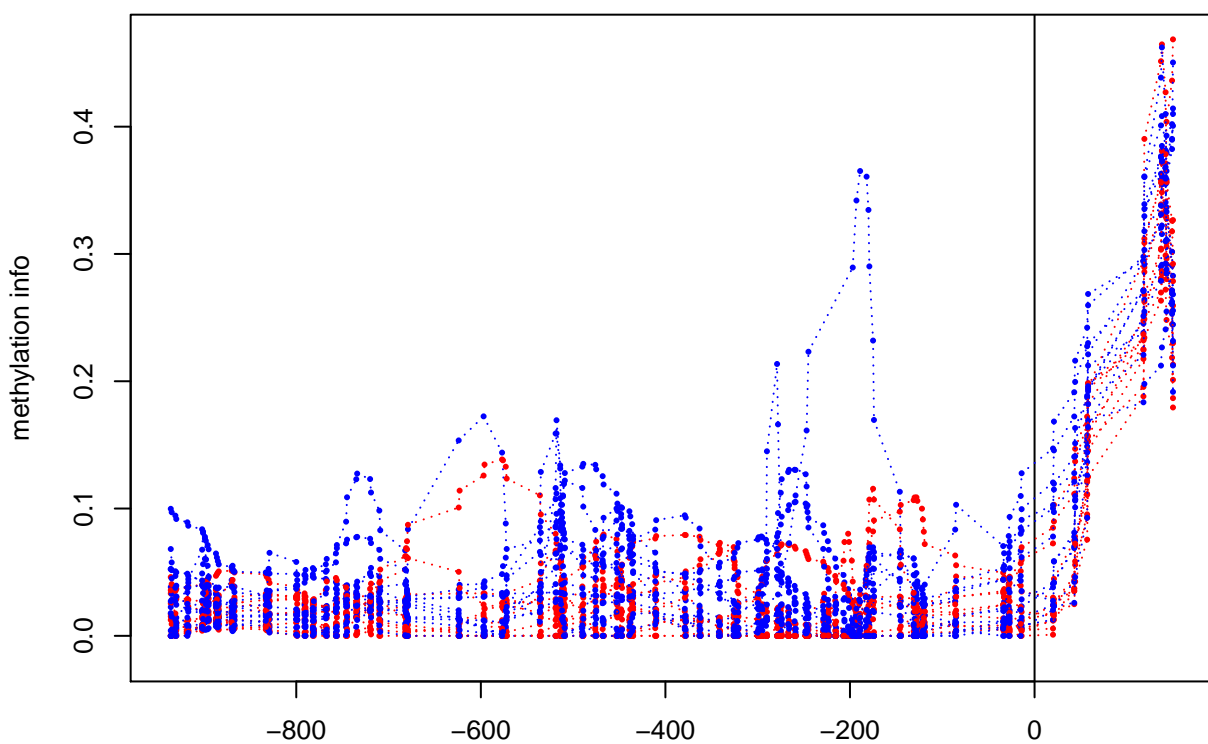

RNAseq logFC(UC-N)= 1.64

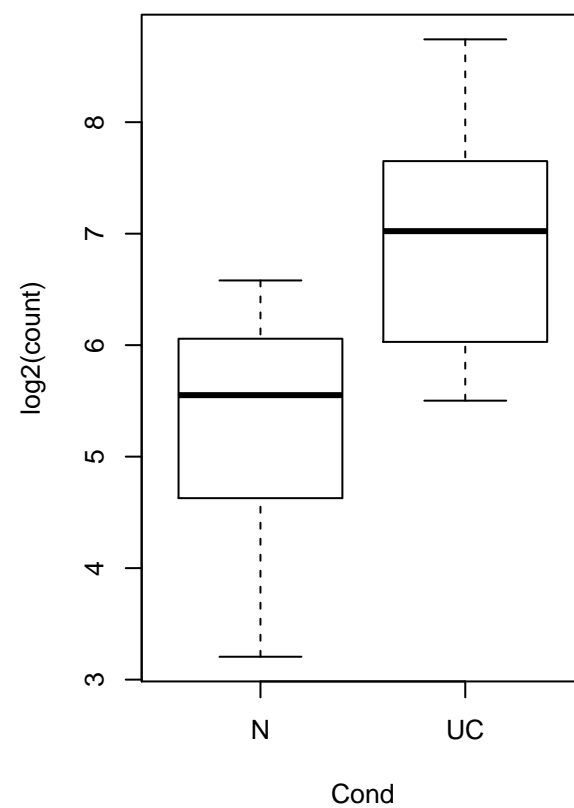

TGIF2 average UC-N %methylation max=12.02% min=-39.01%

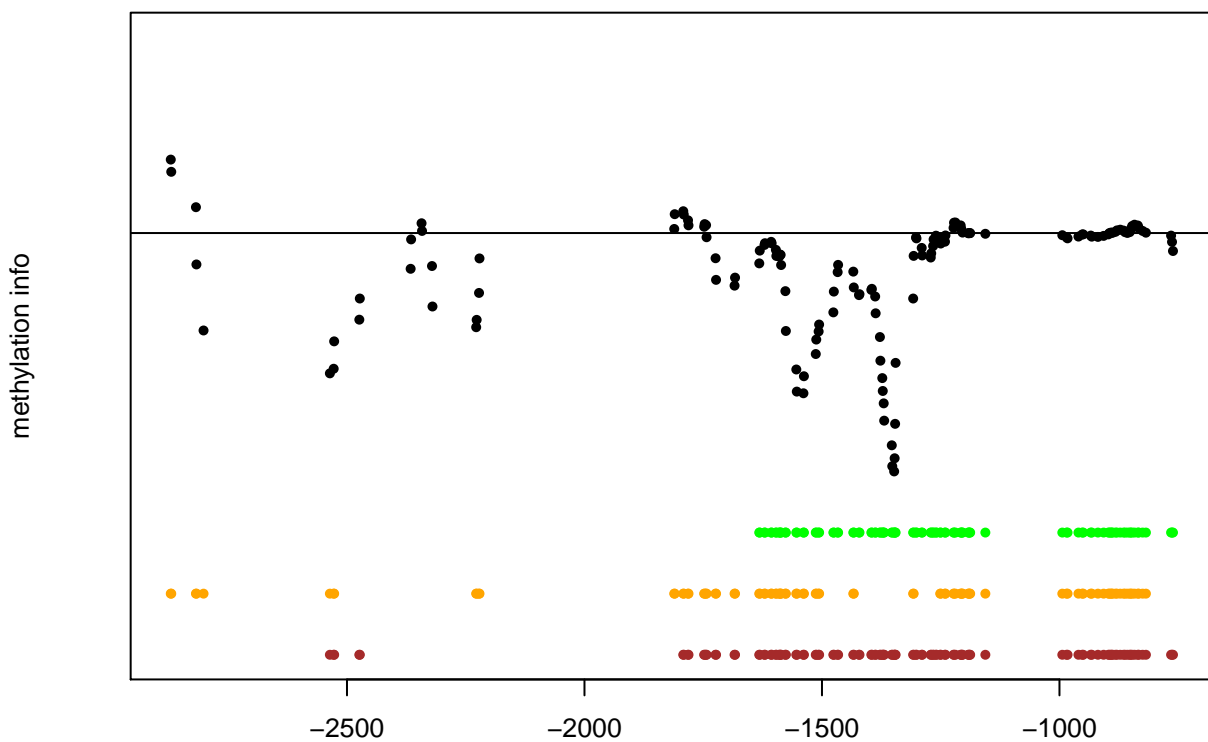

TGIF2 raw %methylation, red=UC, blue=Normal

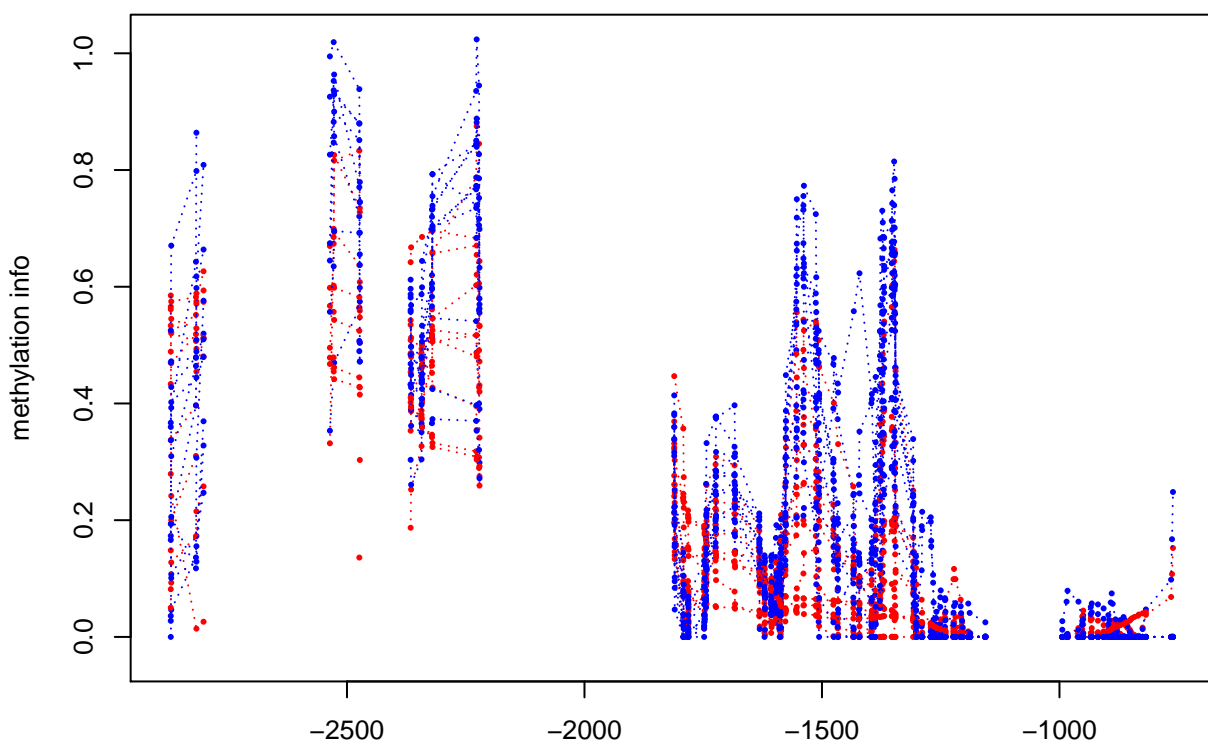

RNAseq logFC(UC-N)= 1.01

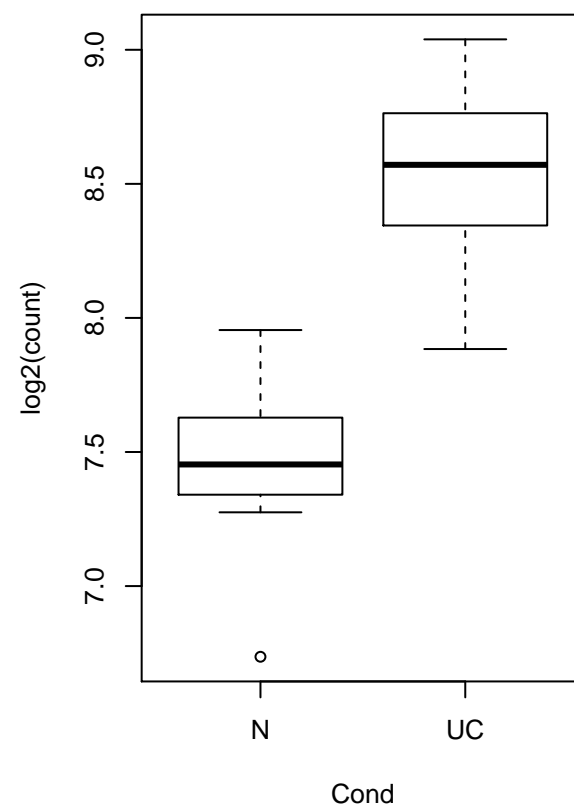



TG average UC-N %methylation max=-5.59% min=-6.74%

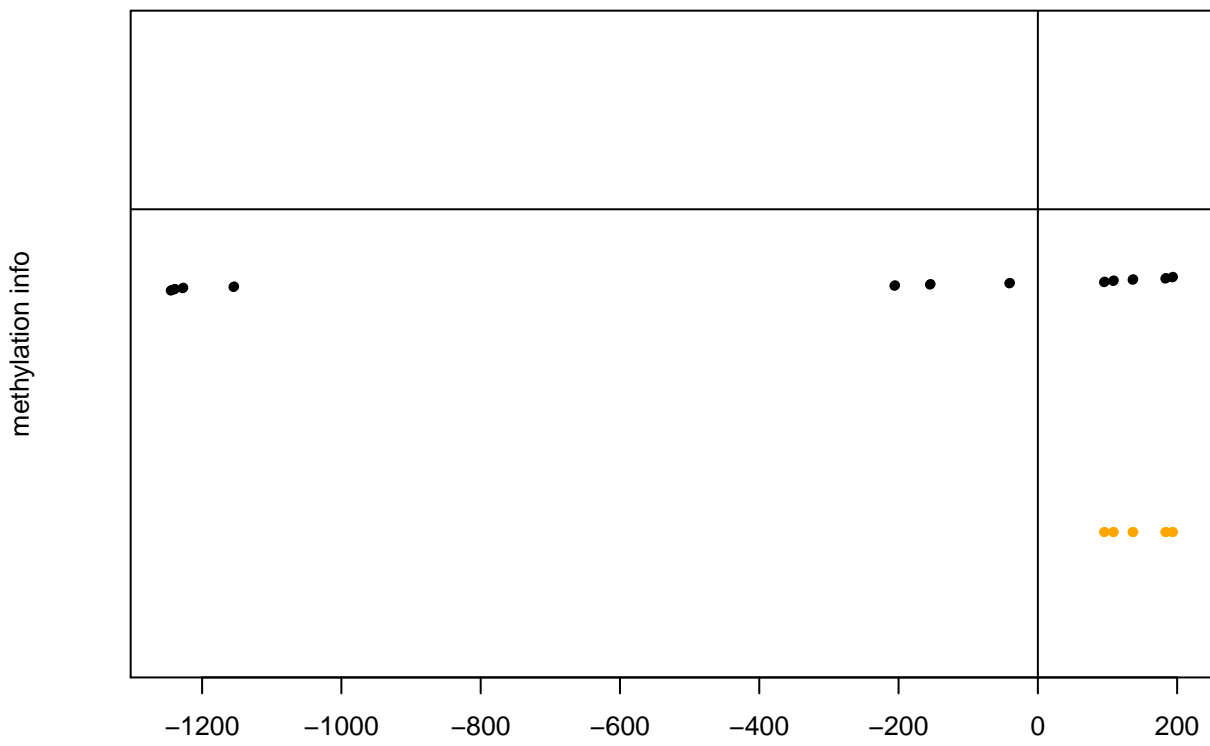

TG raw %methylation, red=UC, blue=Normal

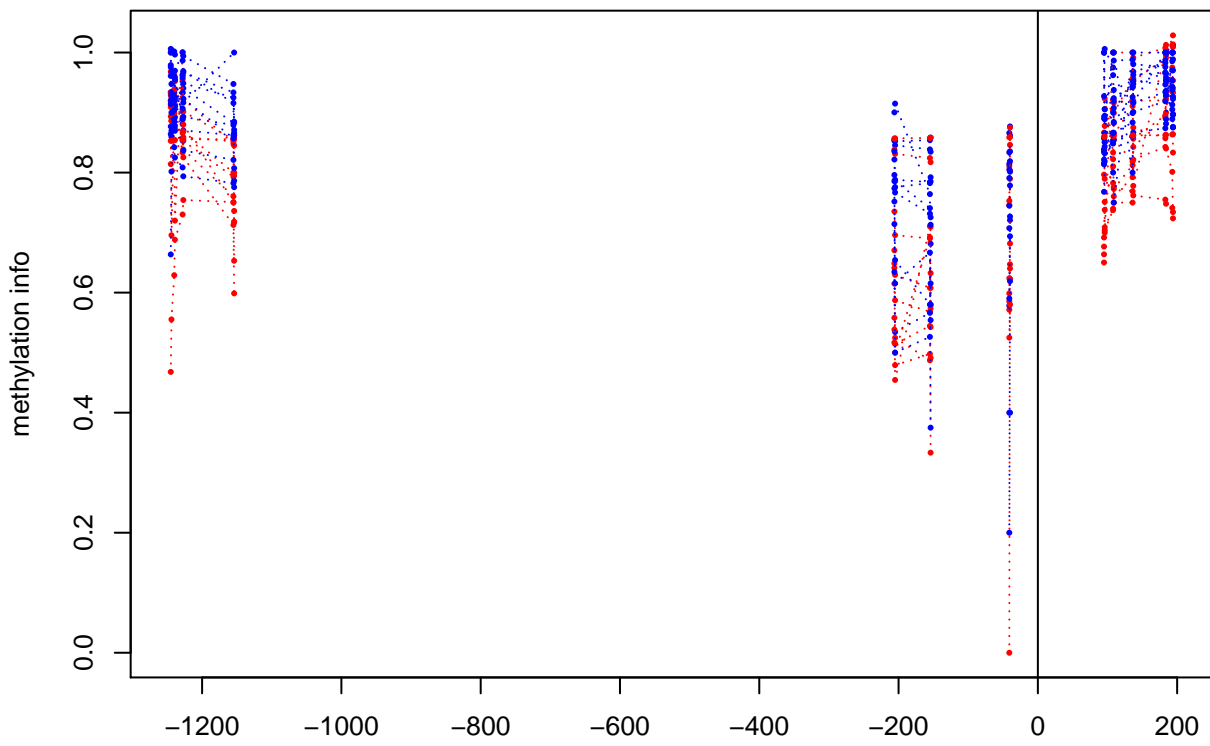

RNAseq logFC(UC-N)= 1.92

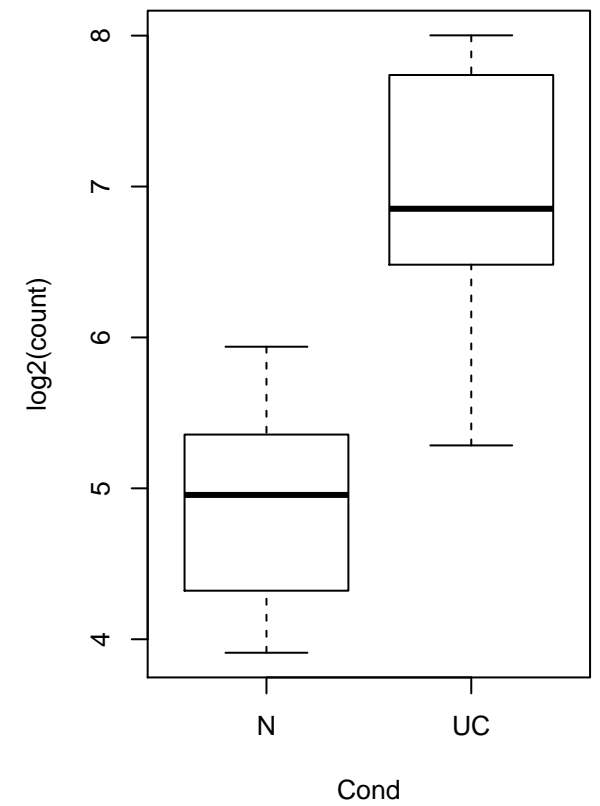

THY1 average UC-N %methylation max=-2.01% min=-13.67%

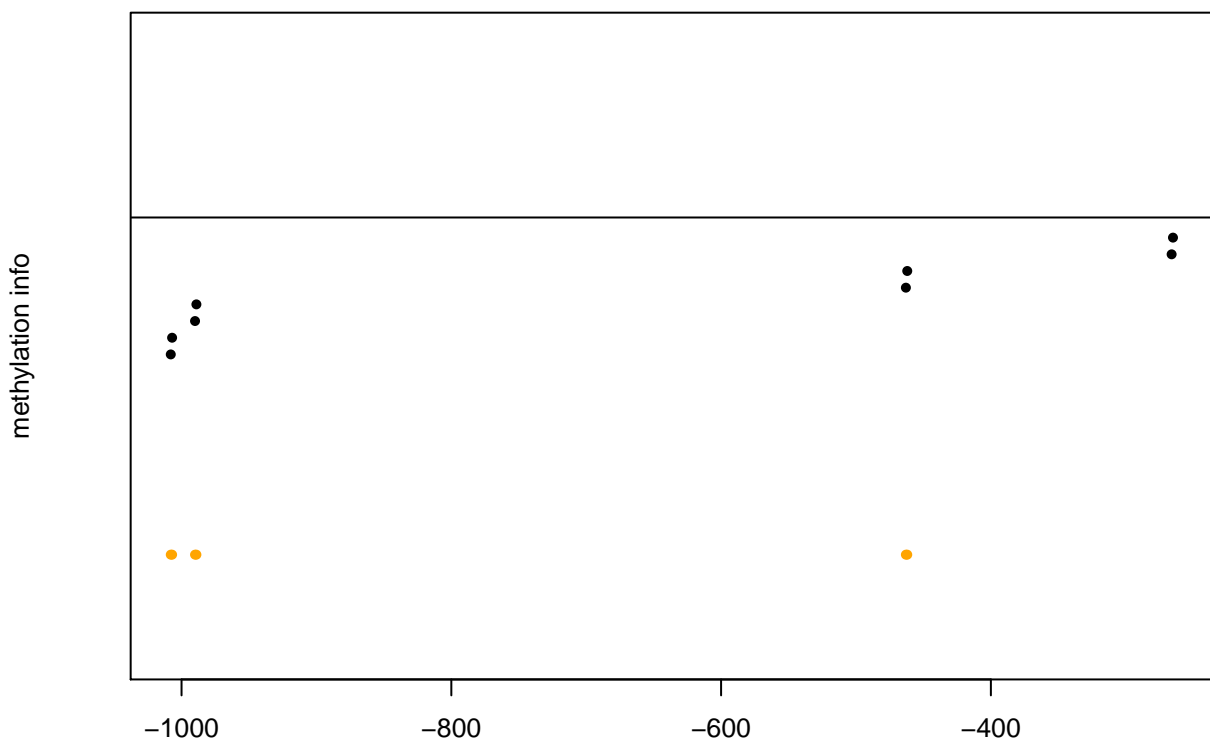

THY1 raw %methylation, red=UC, blue=Normal

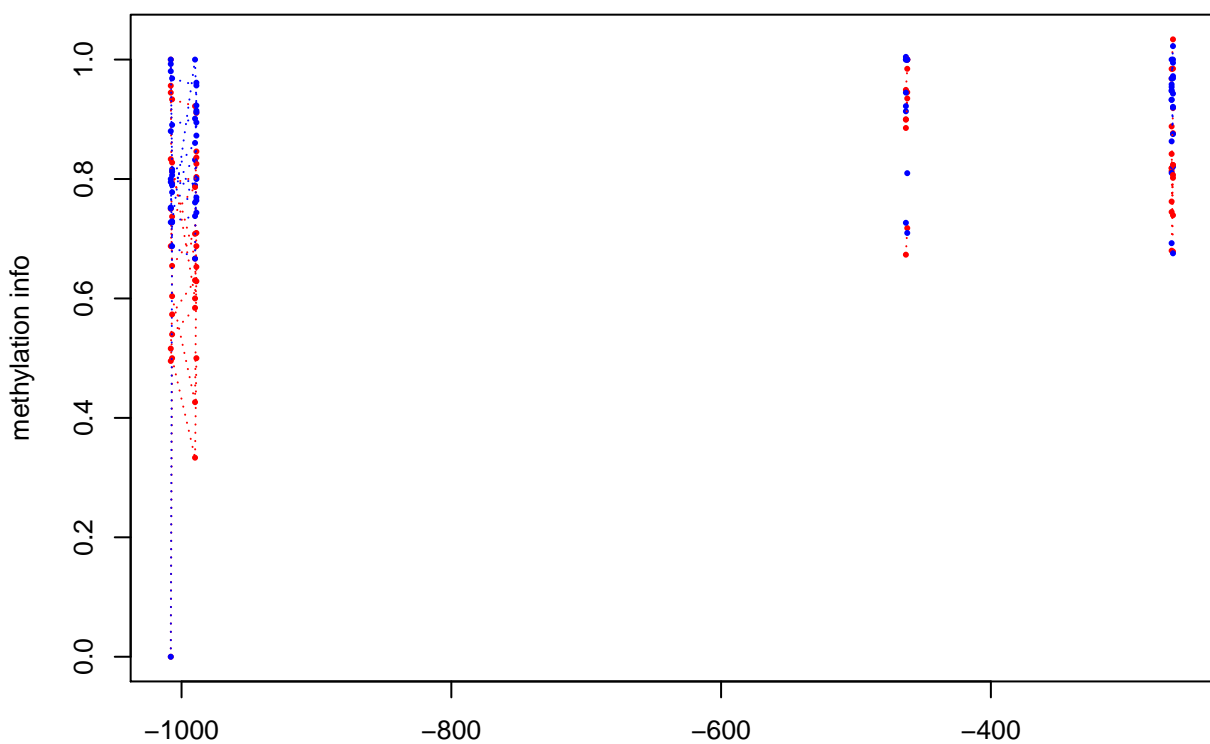

RNAseq logFC(UC-N)= 1.57

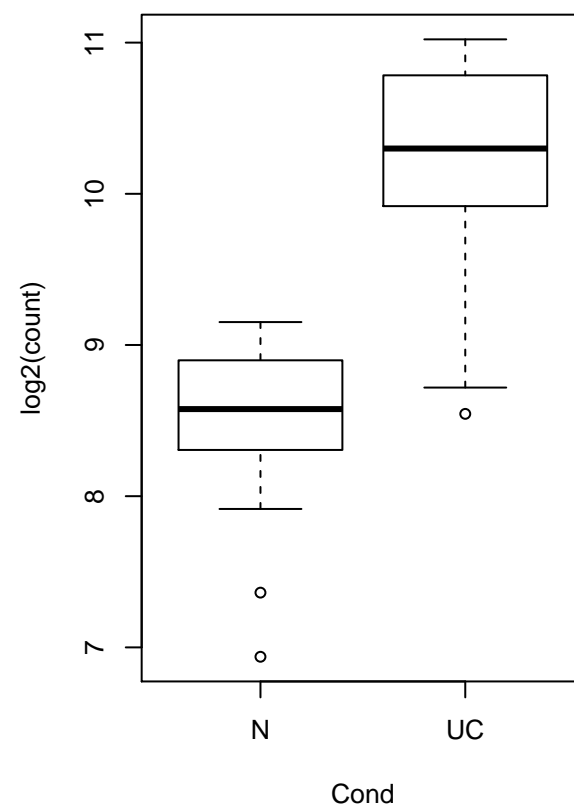

TIMP4 average UC-N %methylation max=18.23% min=9%

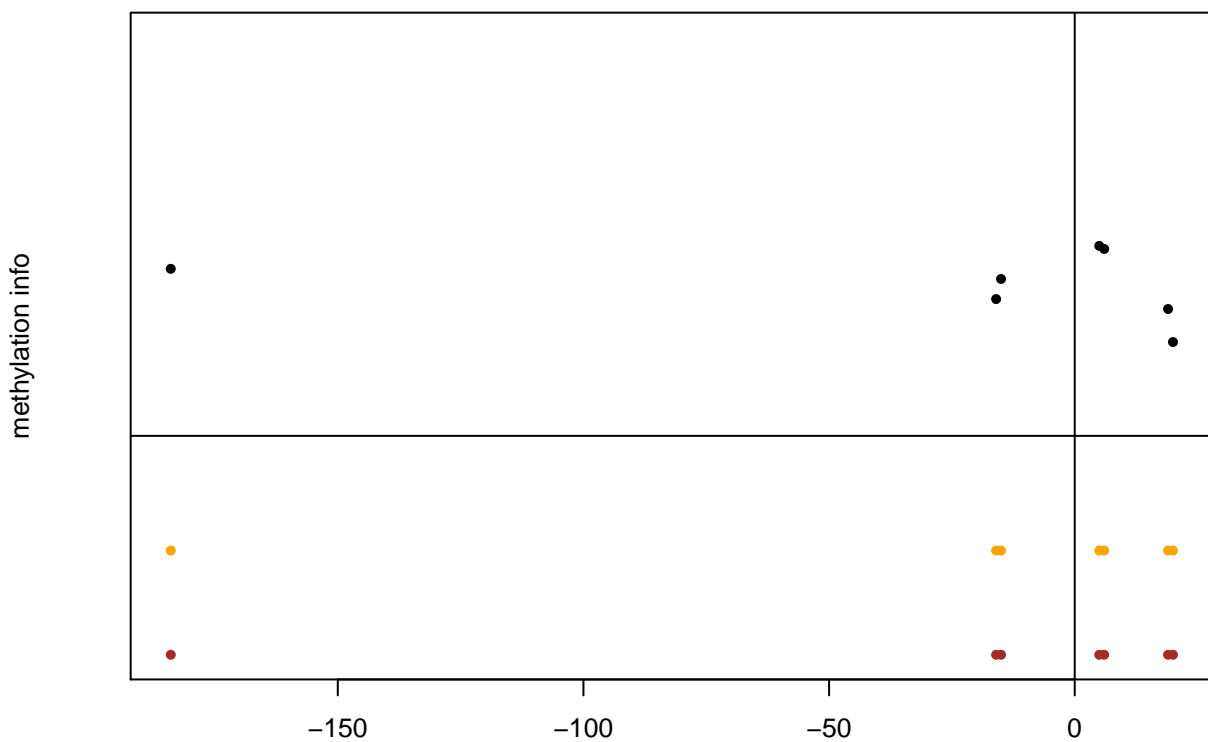

TIMP4 raw %methylation, red=UC, blue=Normal

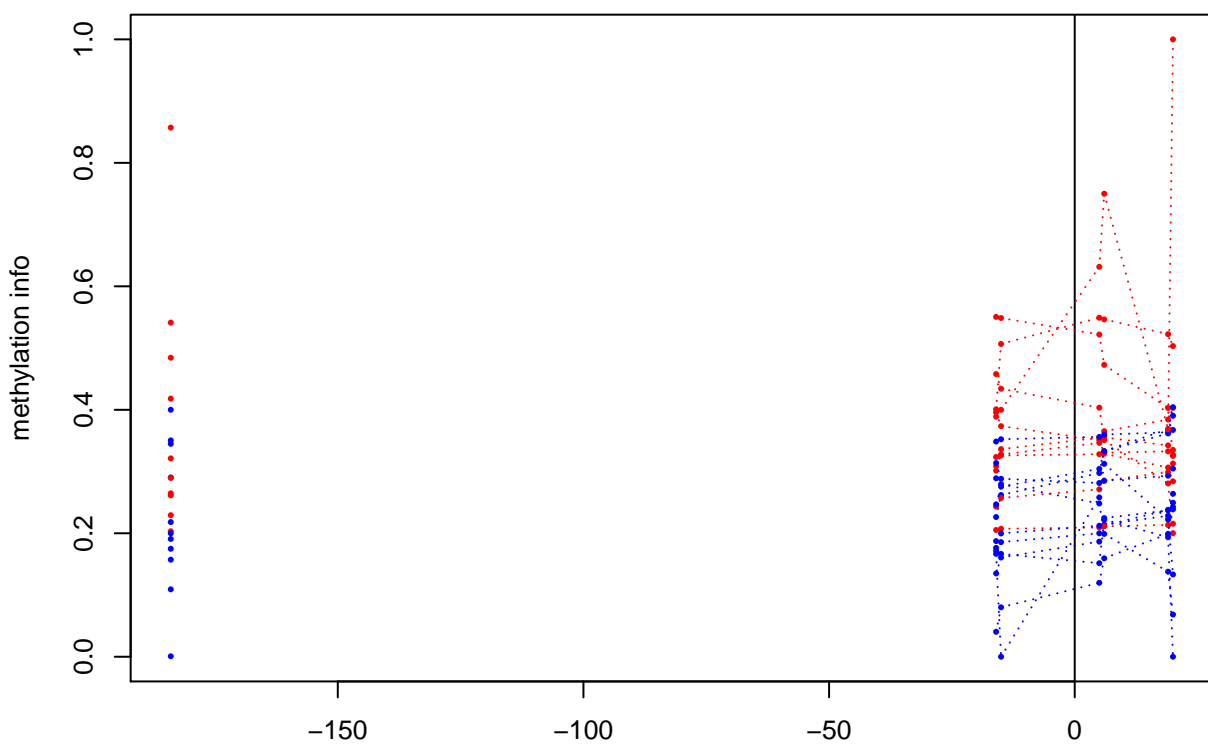

RNAseq logFC(UC-N)= -1.06

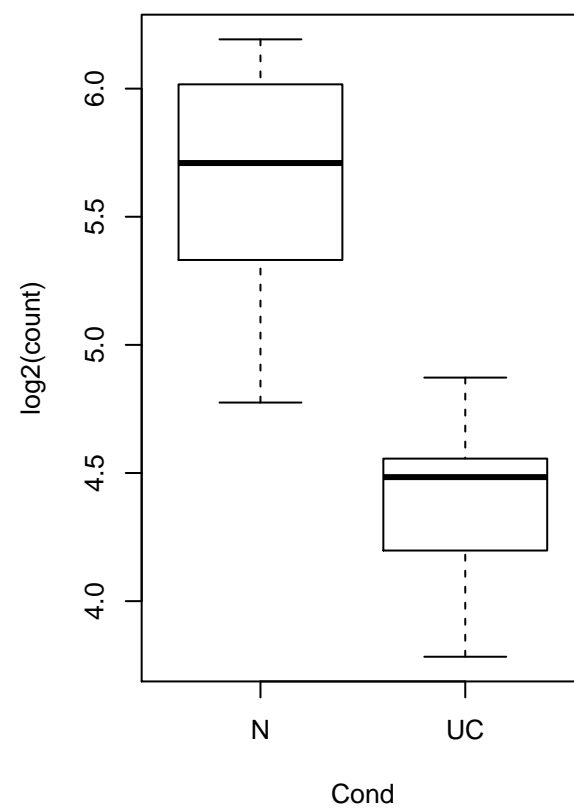

TINCR average UC-N %methylation max=7.62% min=-24.91%

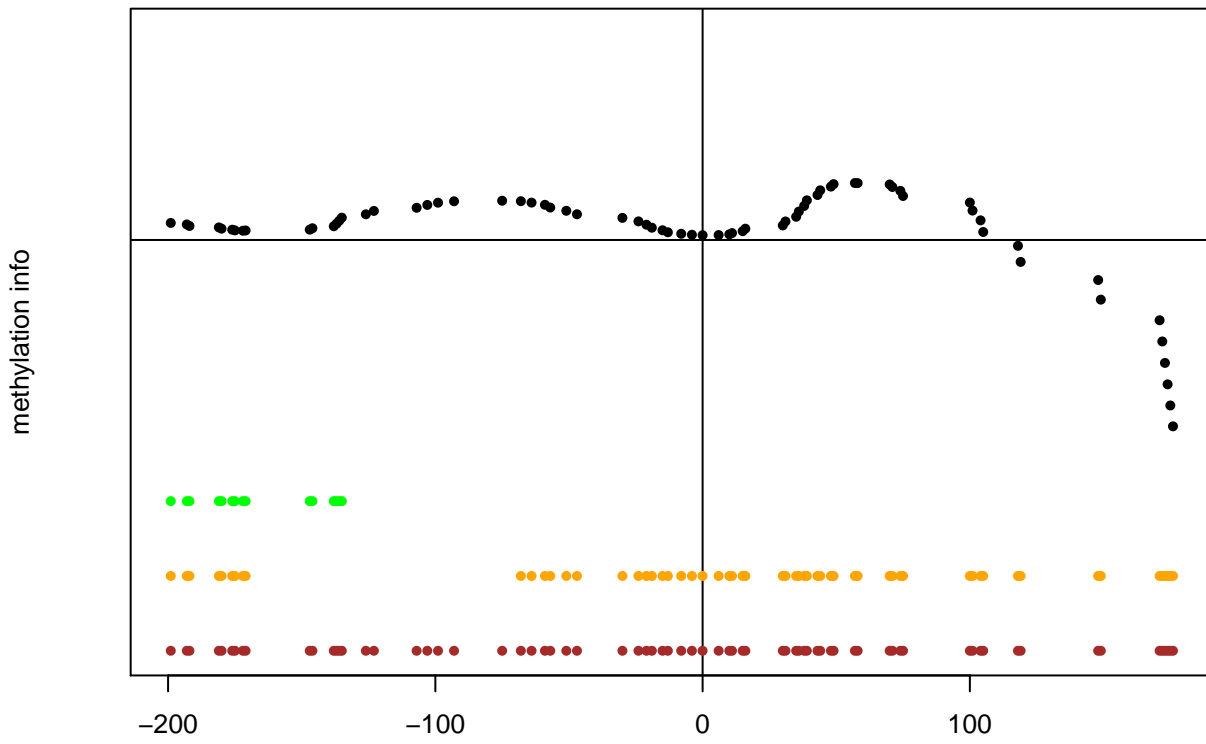

TINCR raw %methylation, red=UC, blue=Normal

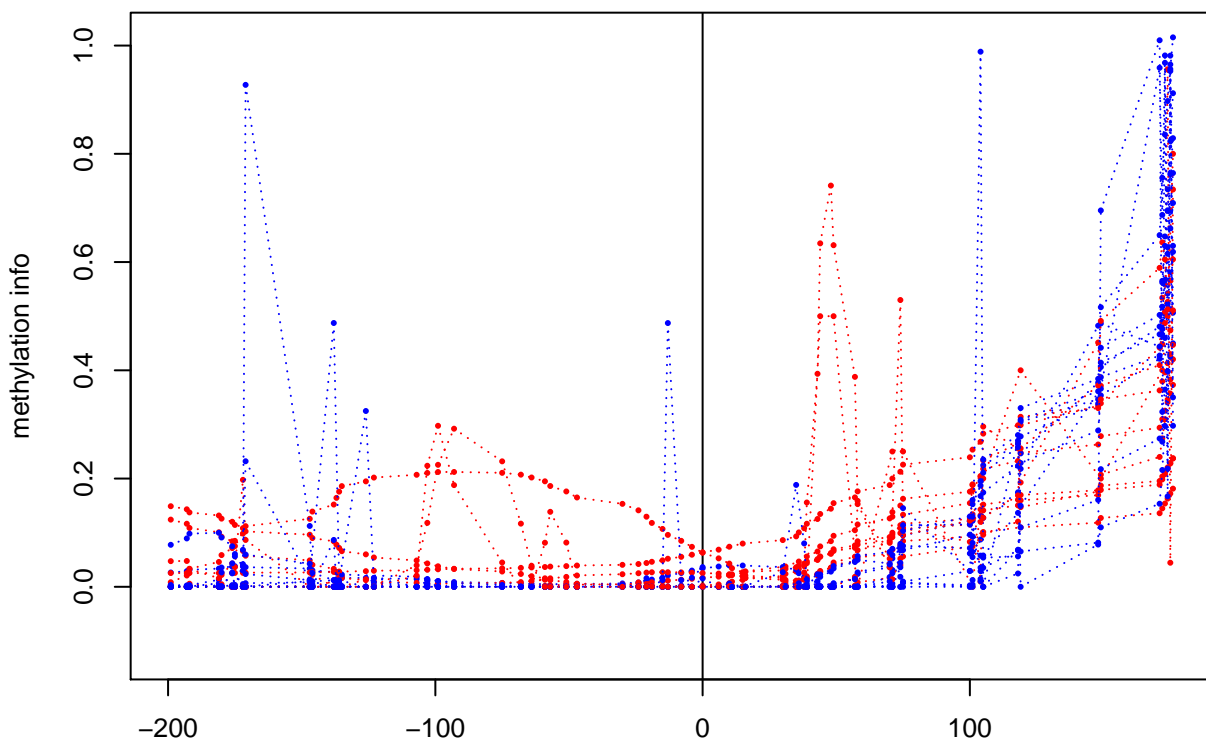

RNAseq logFC(UC-N)= -1.98

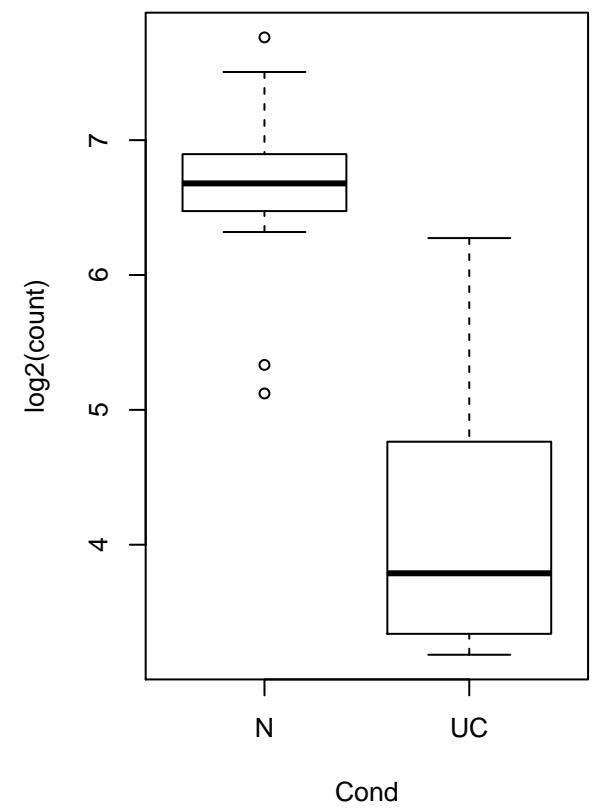

TLR8 average UC-N %methylation max=-7.25% min=-16.18%

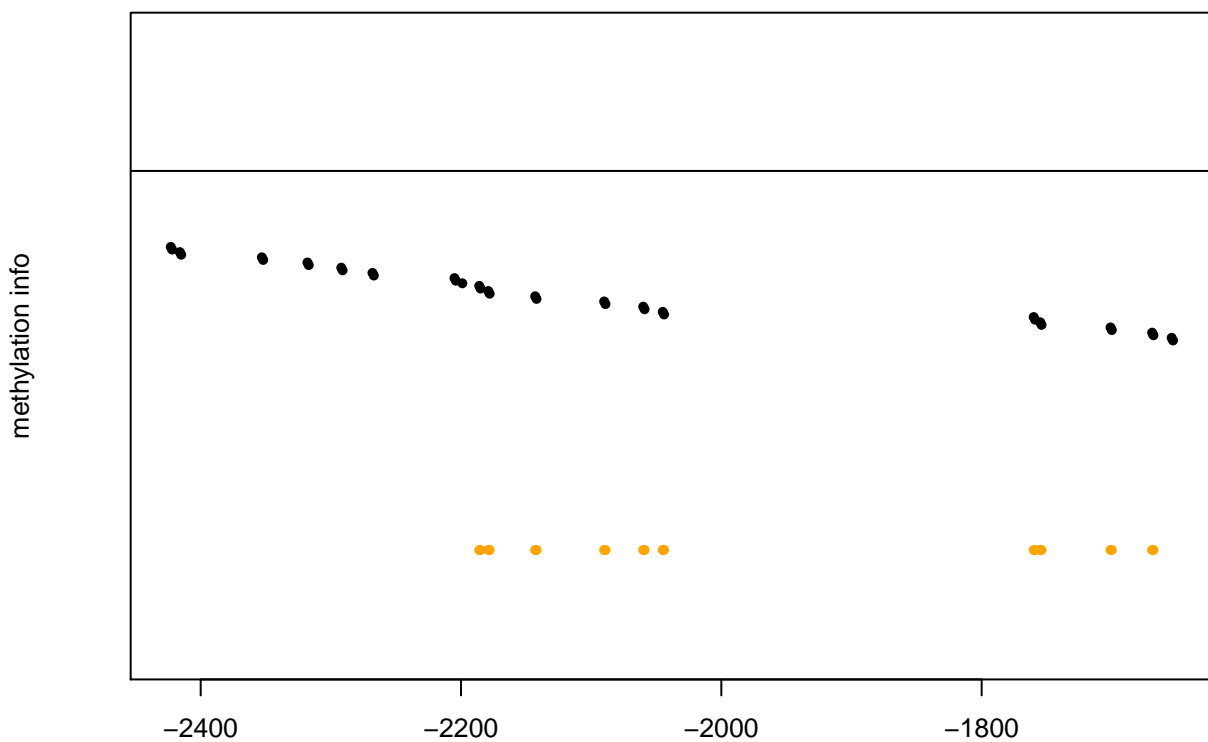

TLR8 raw %methylation, red=UC, blue=Normal

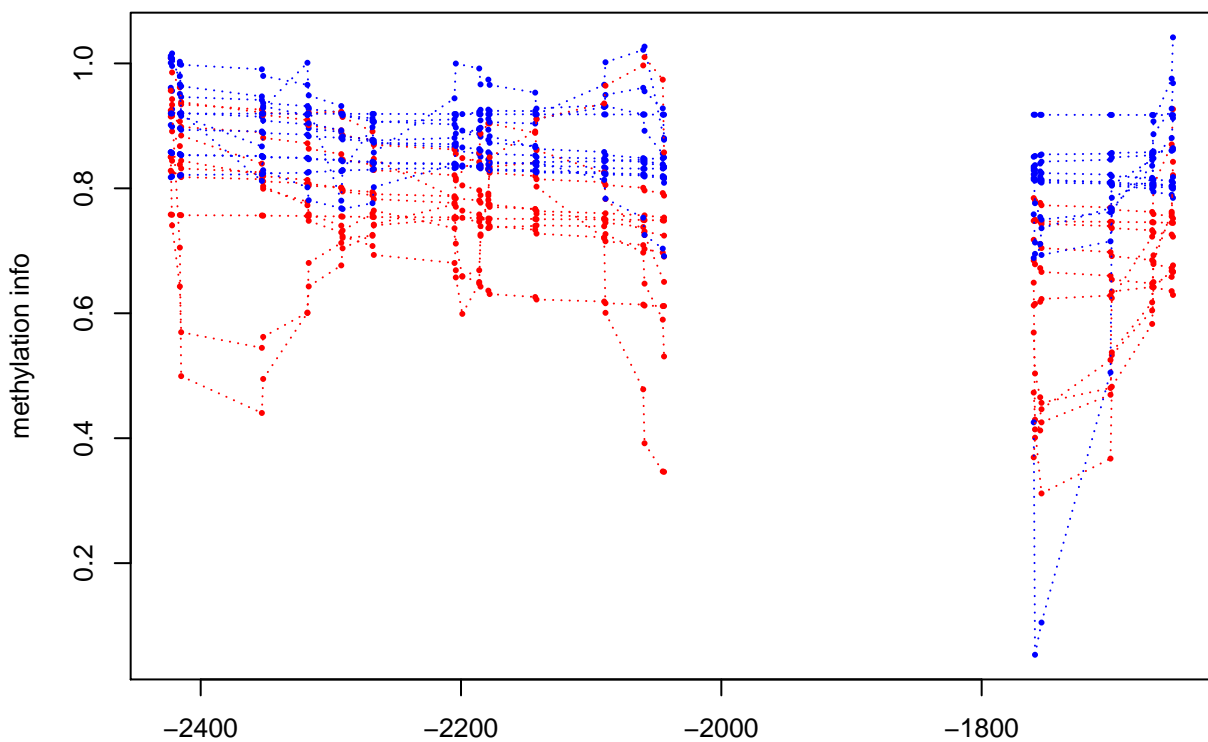

RNAseq logFC(UC-N)= 1.04

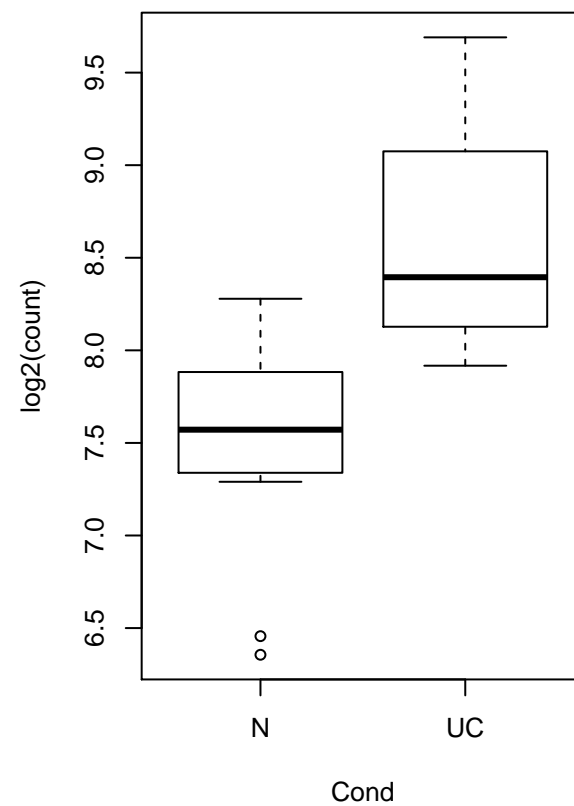

TM4SF20 average UC-N %methylation max=22.06% min=8.57%

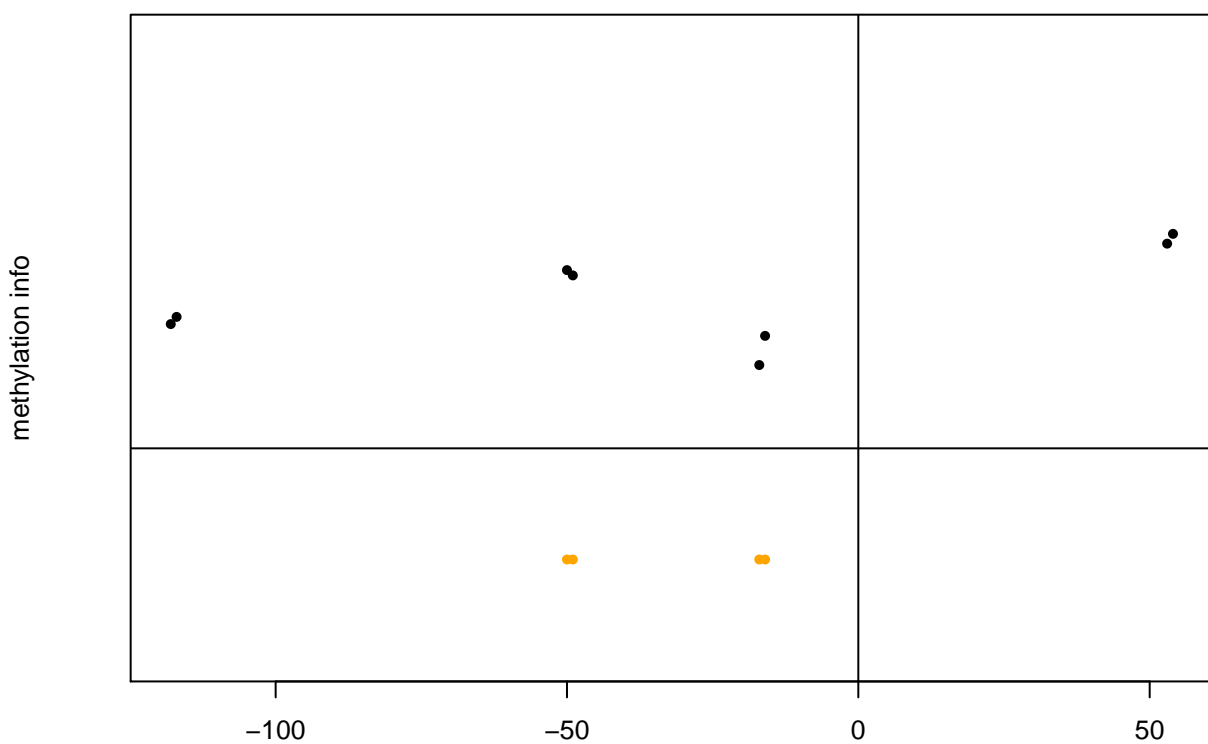

TM4SF20 raw %methylation, red=UC, blue=Normal

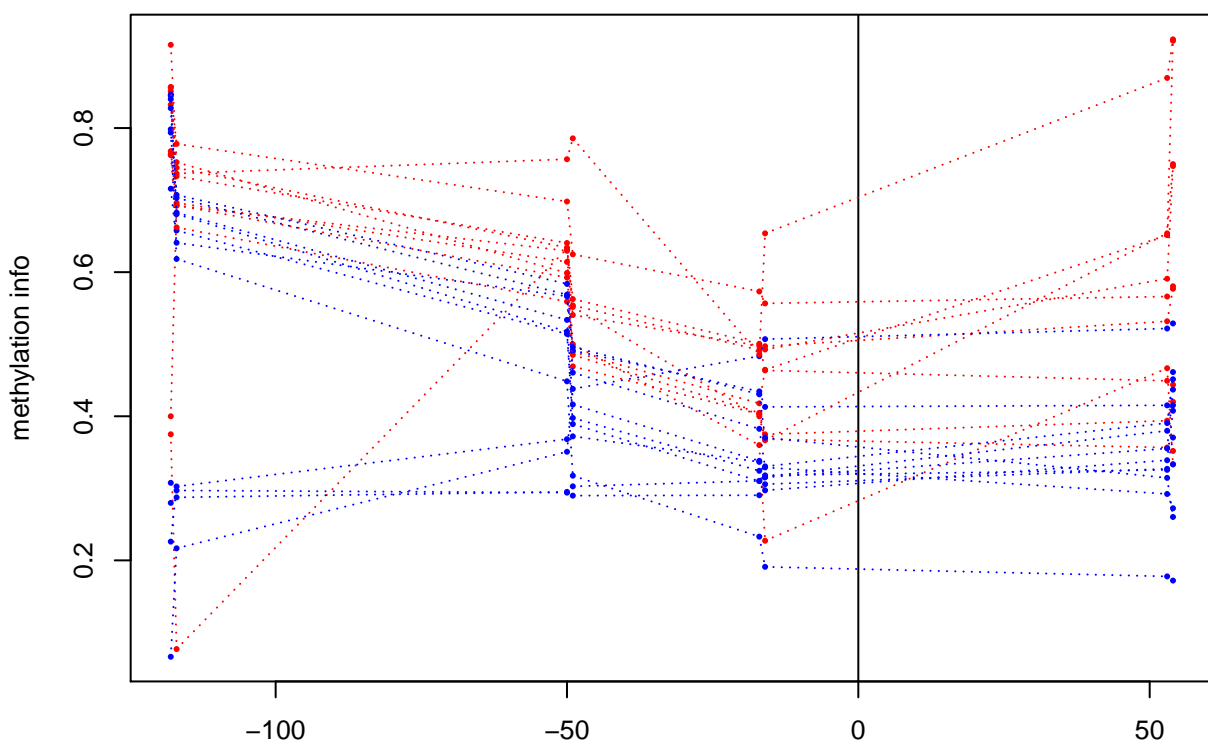

RNAseq logFC(UC-N)= -1.13

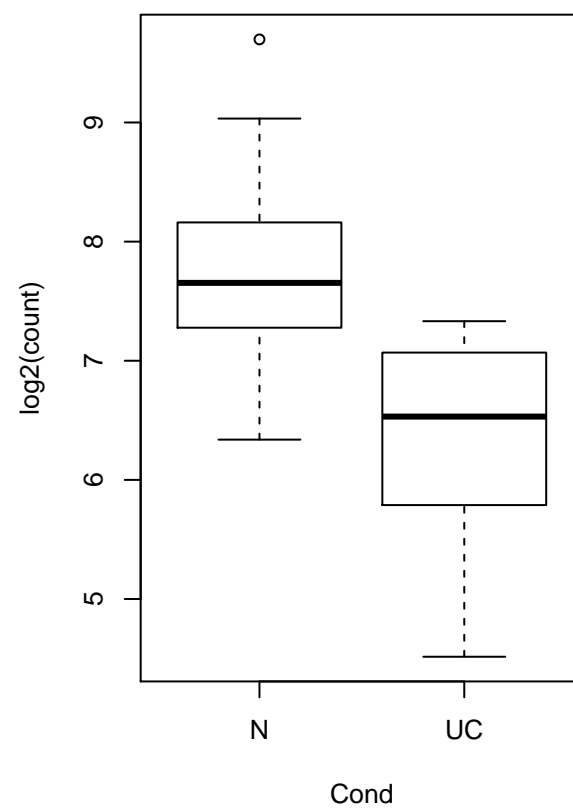

TMC6 average UC-N %methylation max=3.68% min=-22.52%

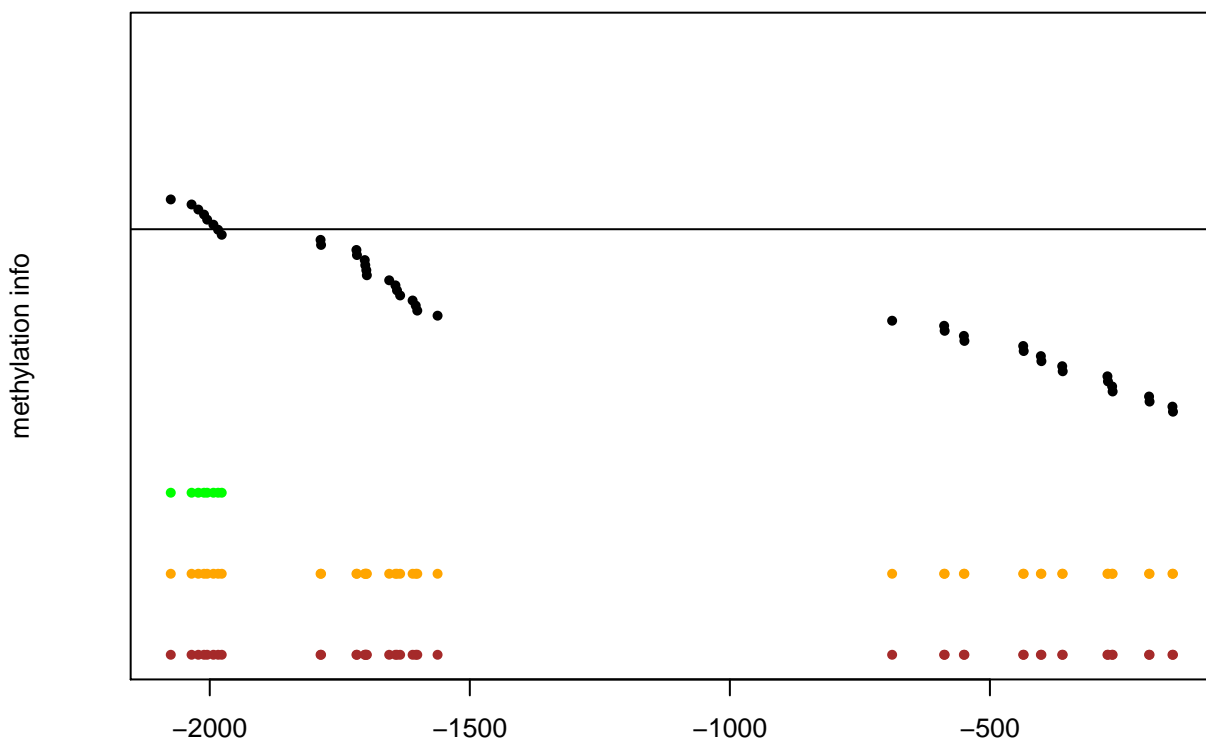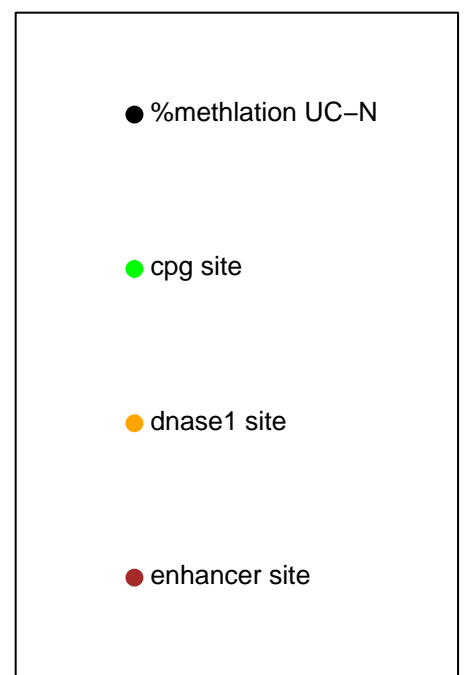

TMC6 raw %methylation, red=UC, blue=Normal

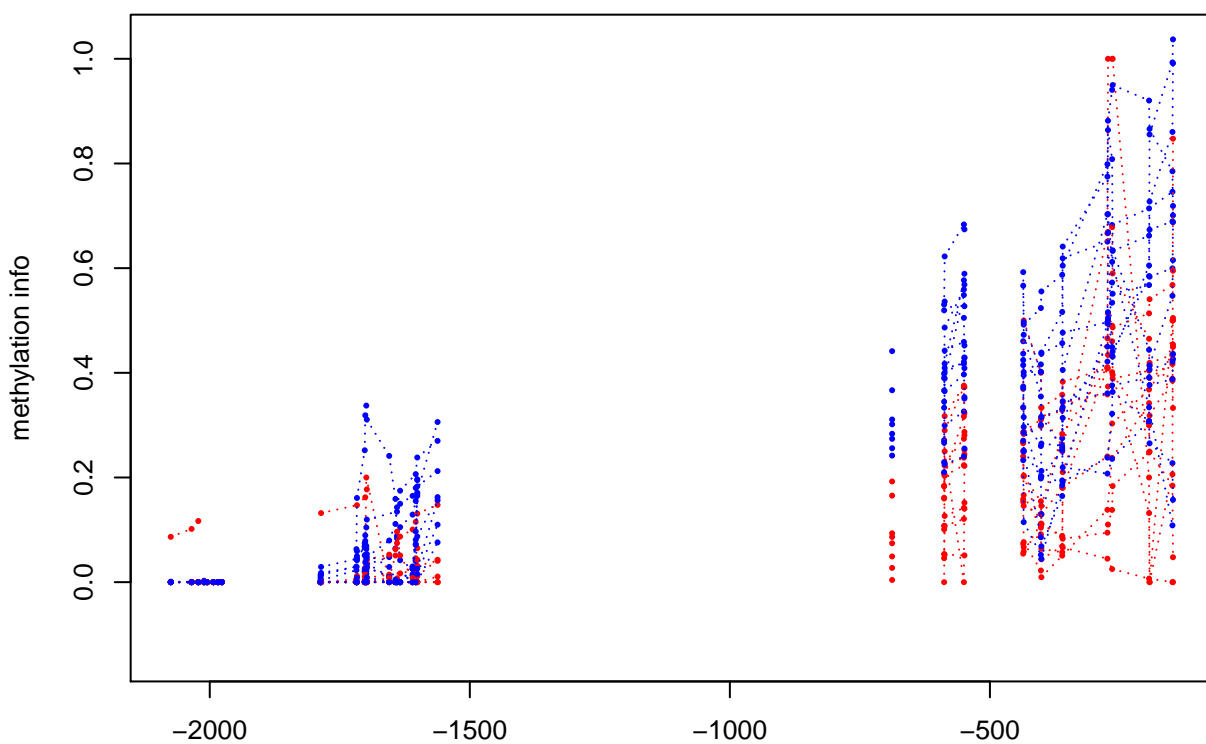

RNAseq logFC(UC-N)= 1.1

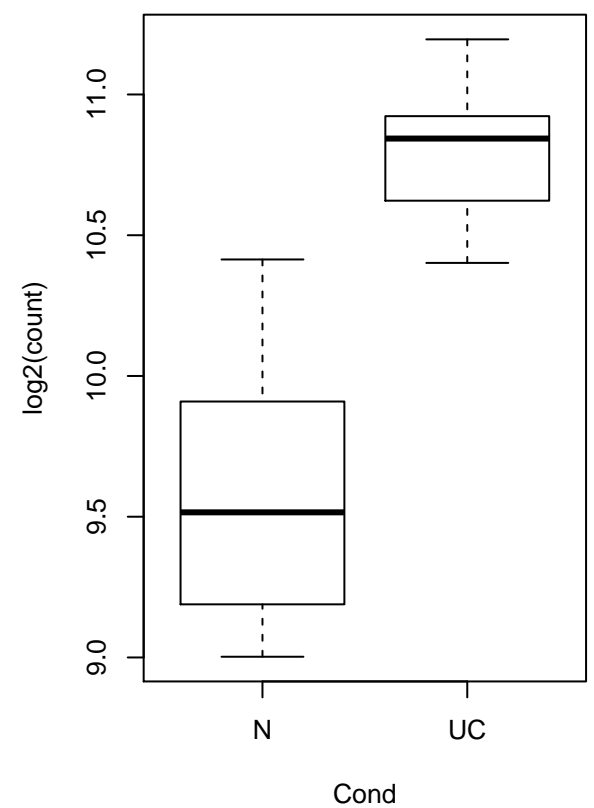

TMC8 average UC-N %methylation max=2.62% min=-28.29%

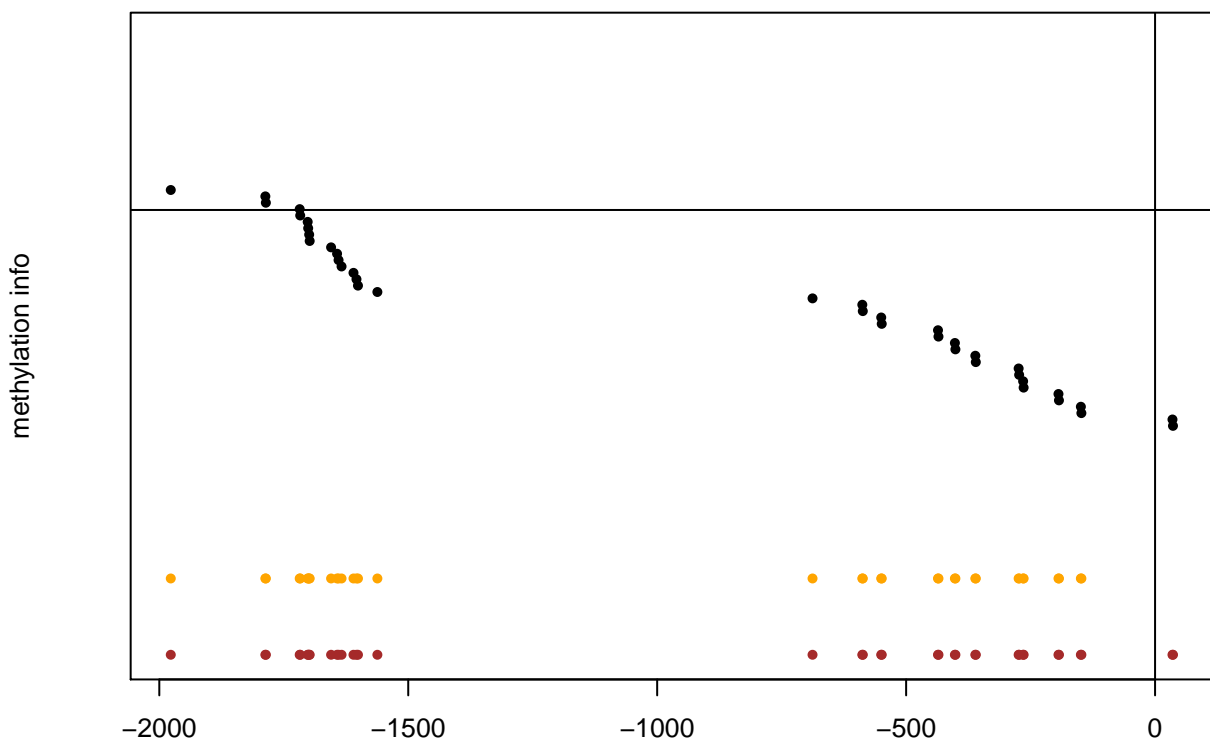

TMC8 raw %methylation, red=UC, blue=Normal

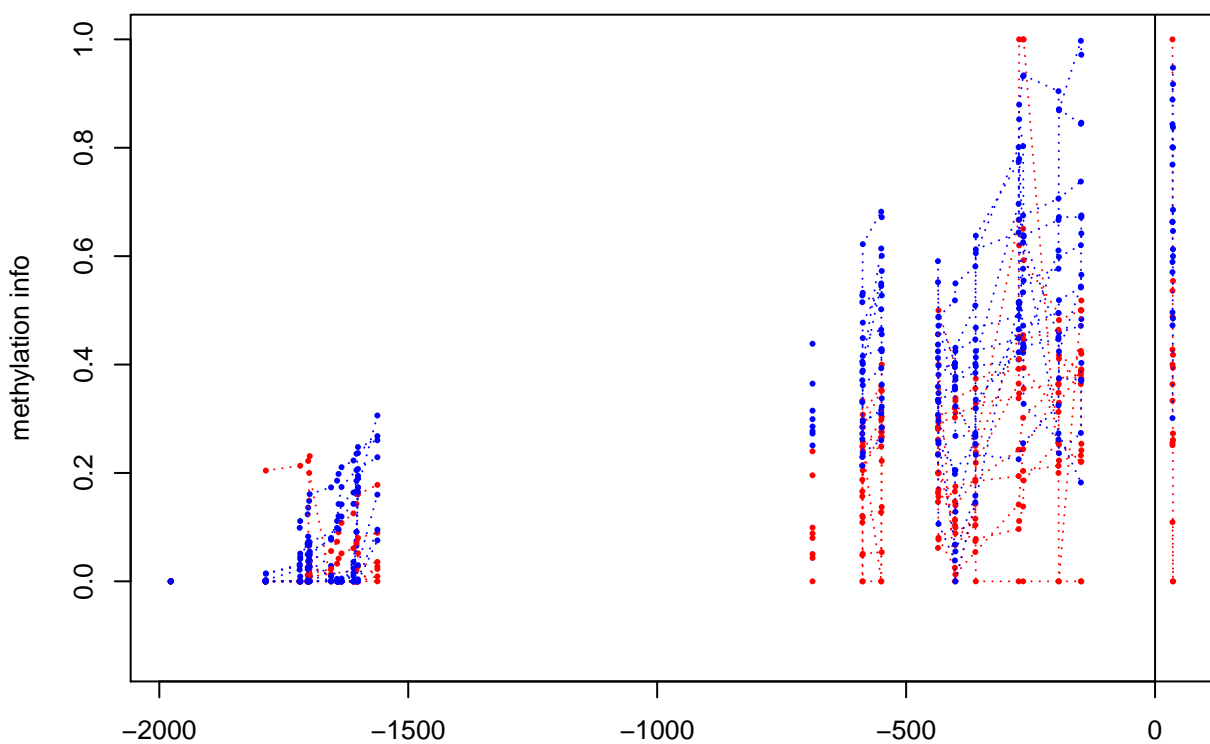

RNAseq logFC(UC-N)= 1.55

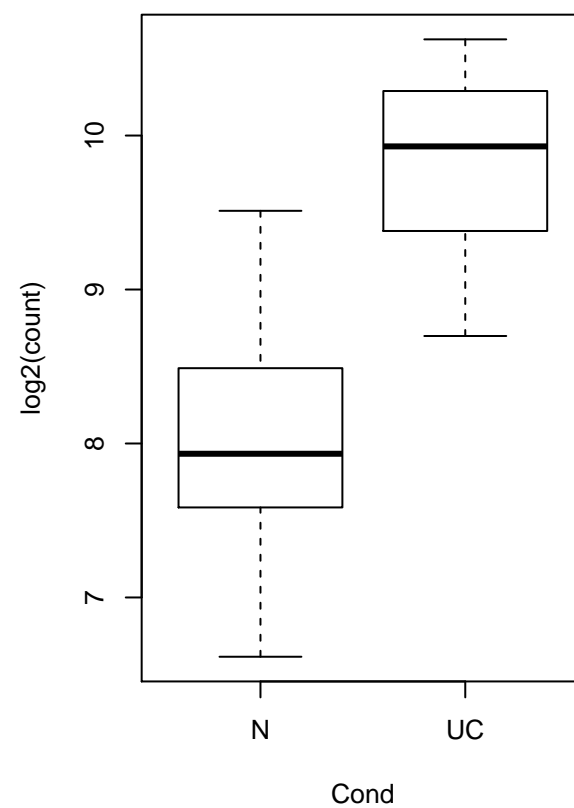



TMEM173 average UC-N %methylation max=4.09% min=-46.79%

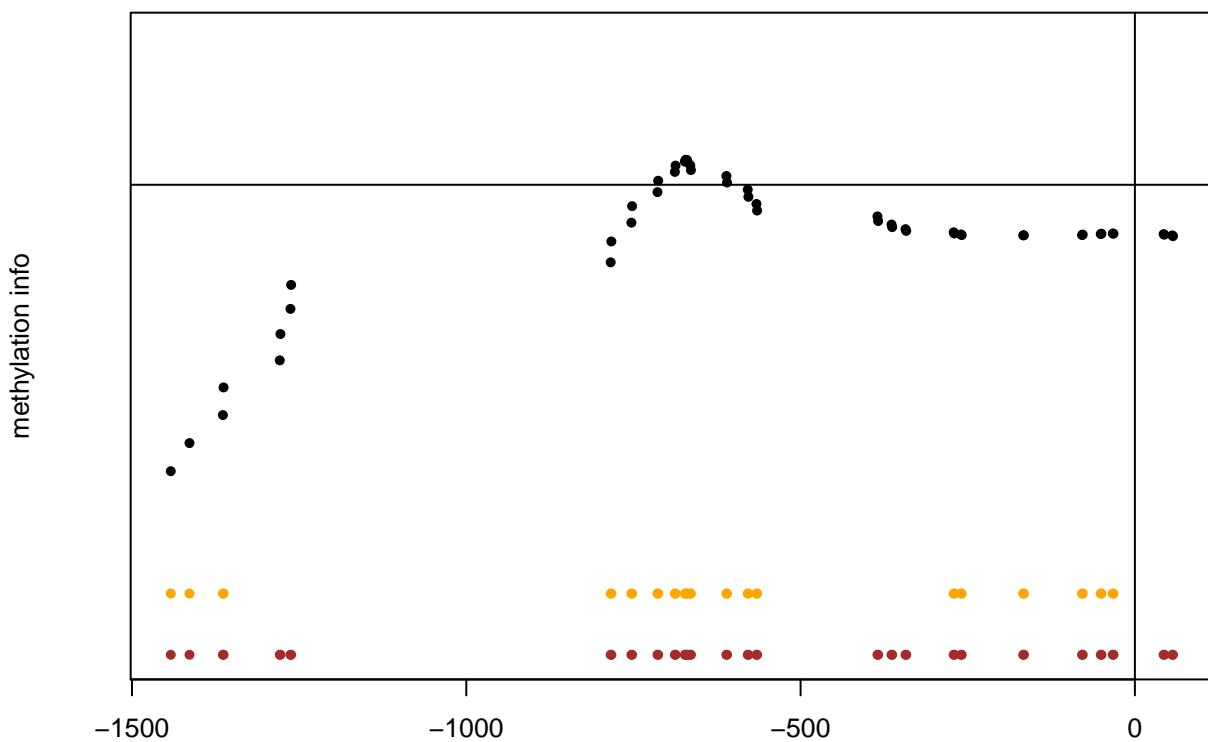

TMEM173 raw %methylation, red=UC, blue=Normal

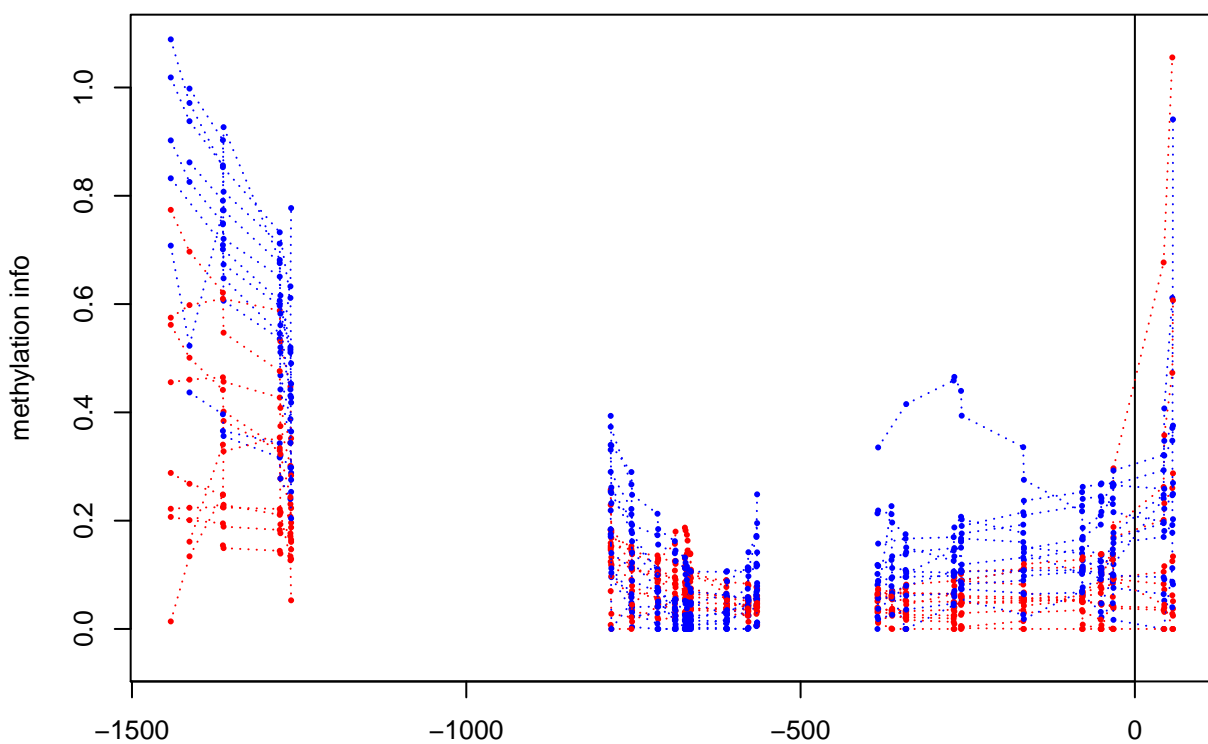

RNAseq logFC(UC-N)= 1.21

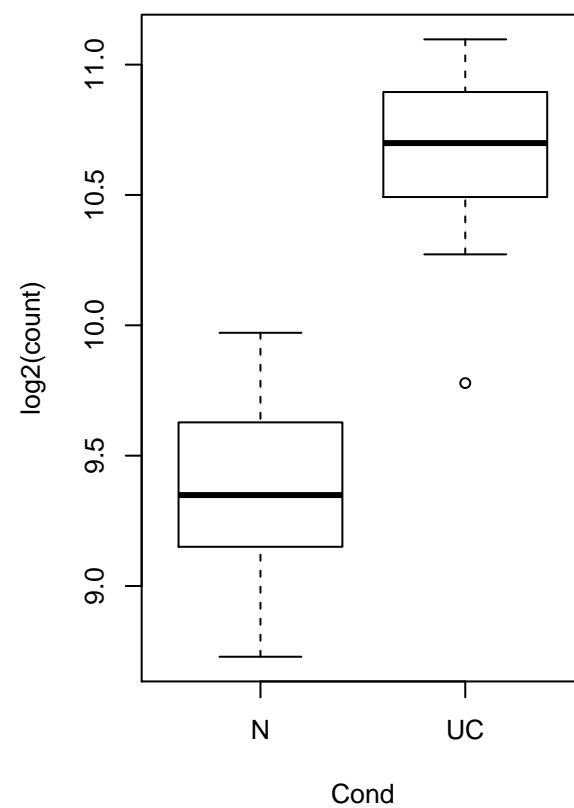

TMEM37 average UC-N %methylation max=26.63% min=-9.91%

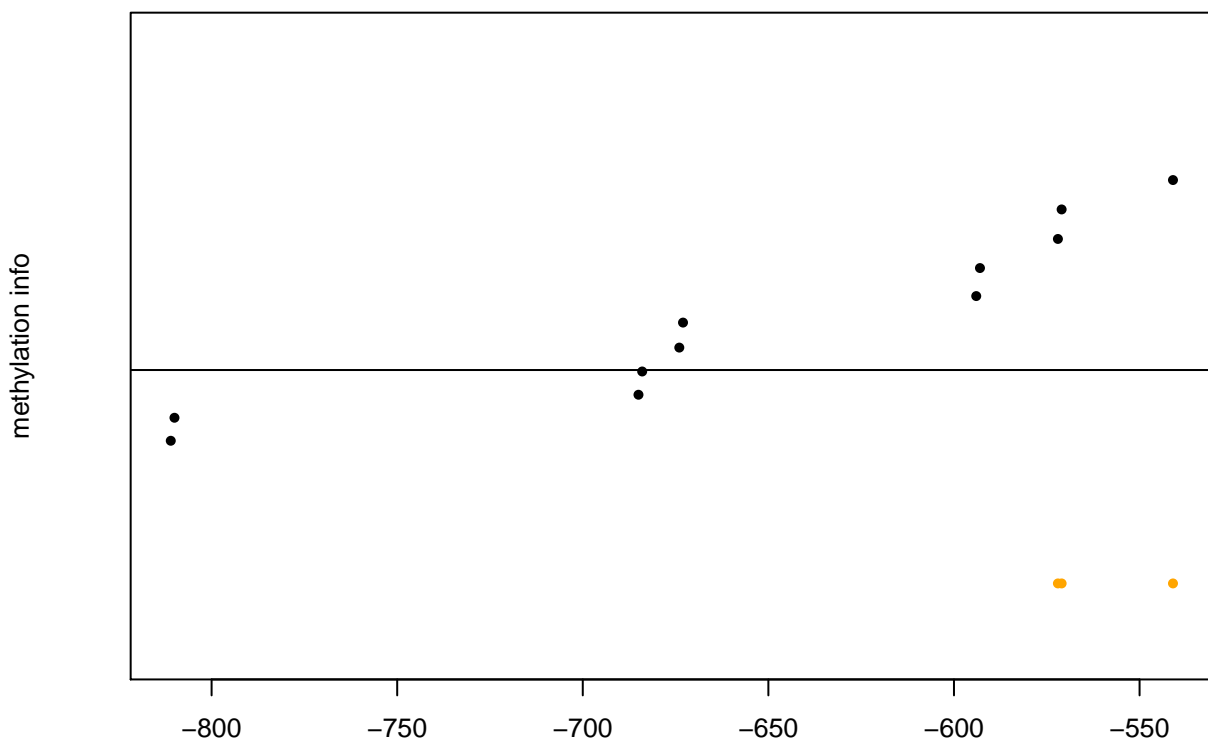

TMEM37 raw %methylation, red=UC, blue=Normal

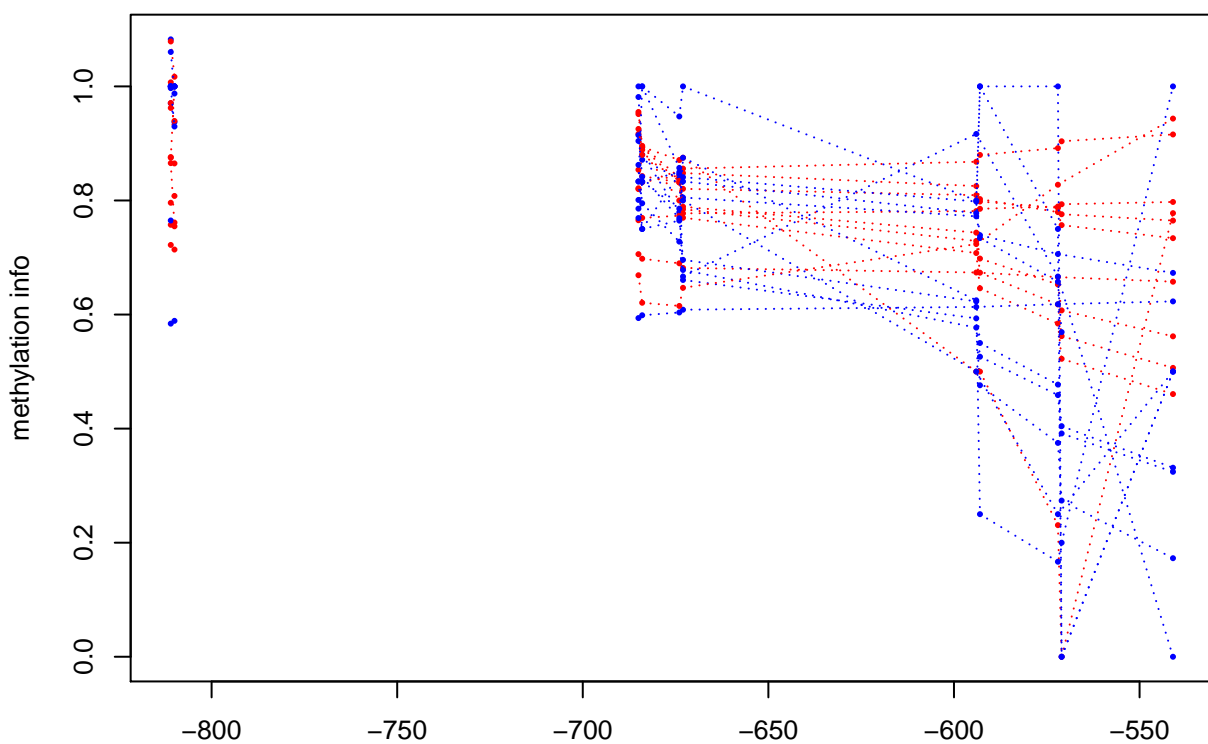

RNAseq logFC(UC-N)= -1.02

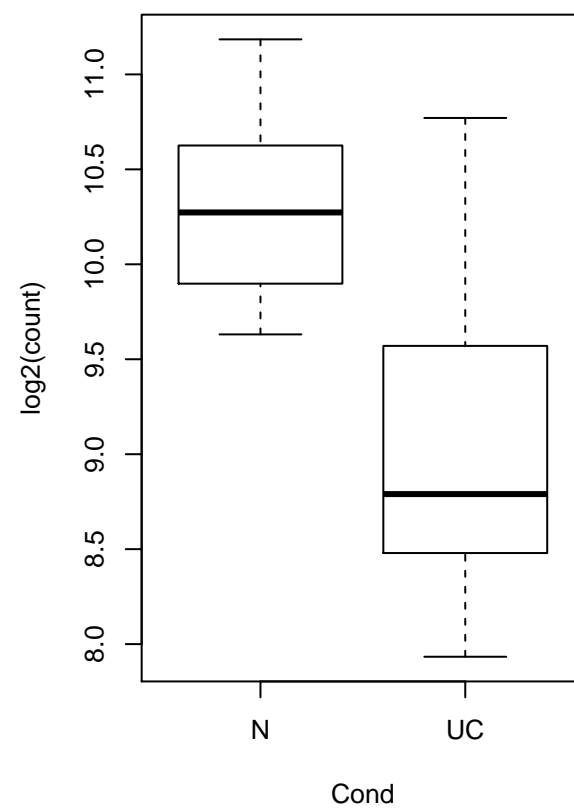

TMEM72 average UC-N %methylation max=18.99% min=-22.42%

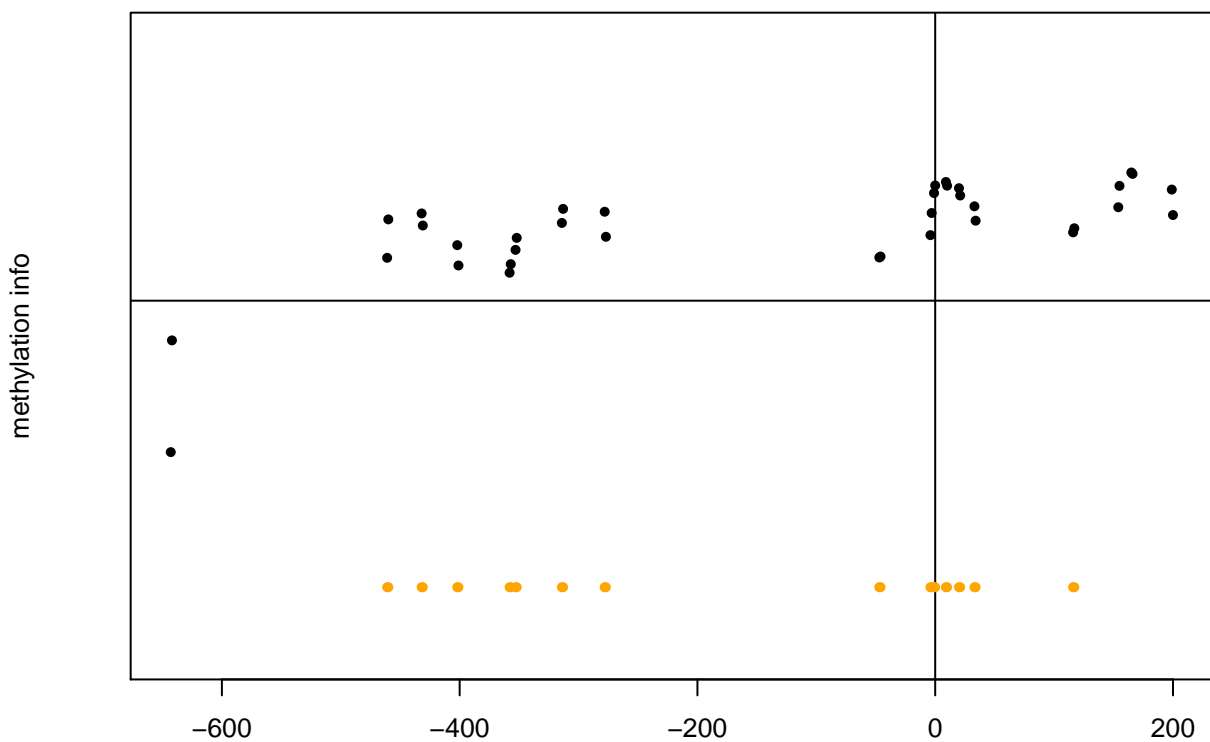

TMEM72 raw %methylation, red=UC, blue=Normal

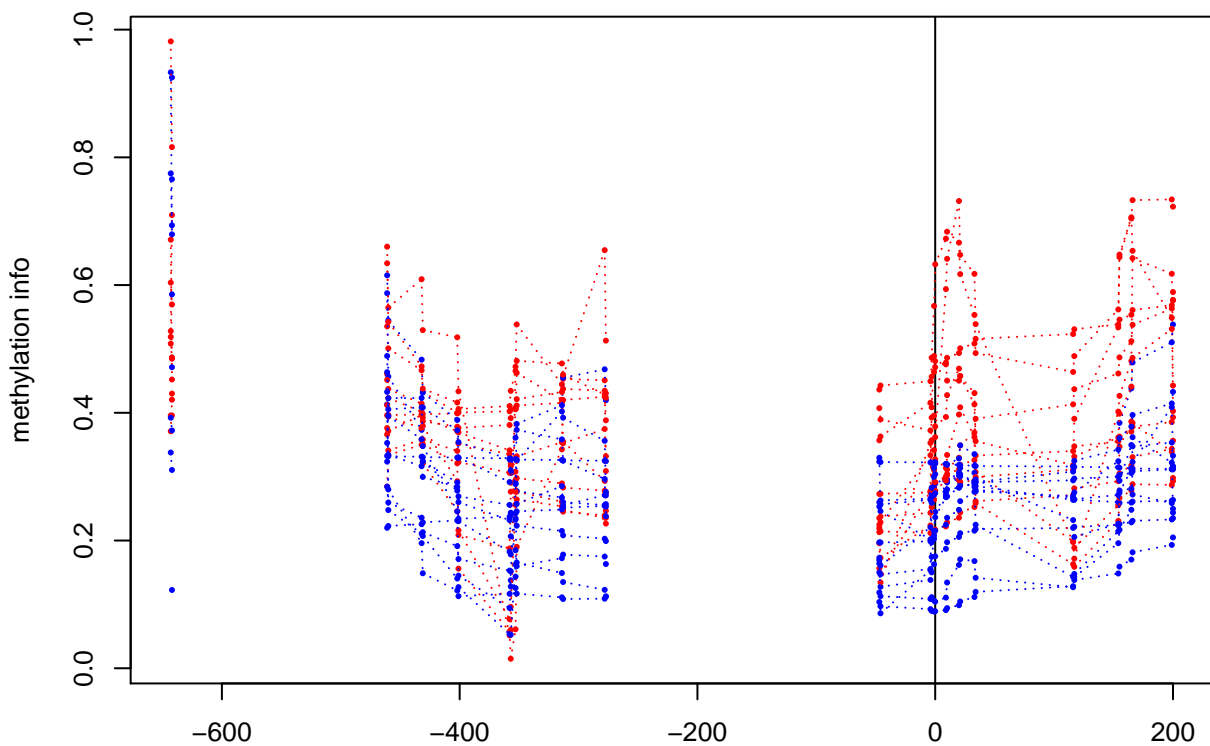

RNAseq logFC(UC-N)= -1.5

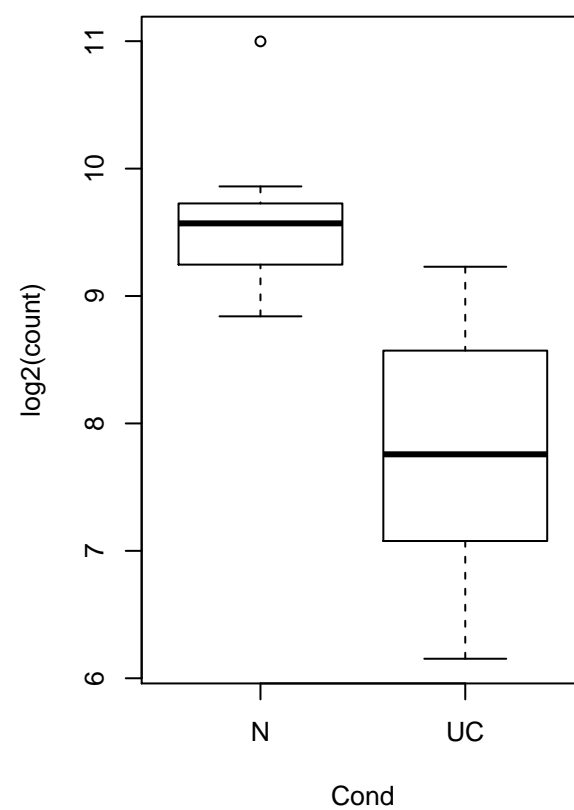

TMEM98 average UC-N %methylation max=21.1% min=-9.75%

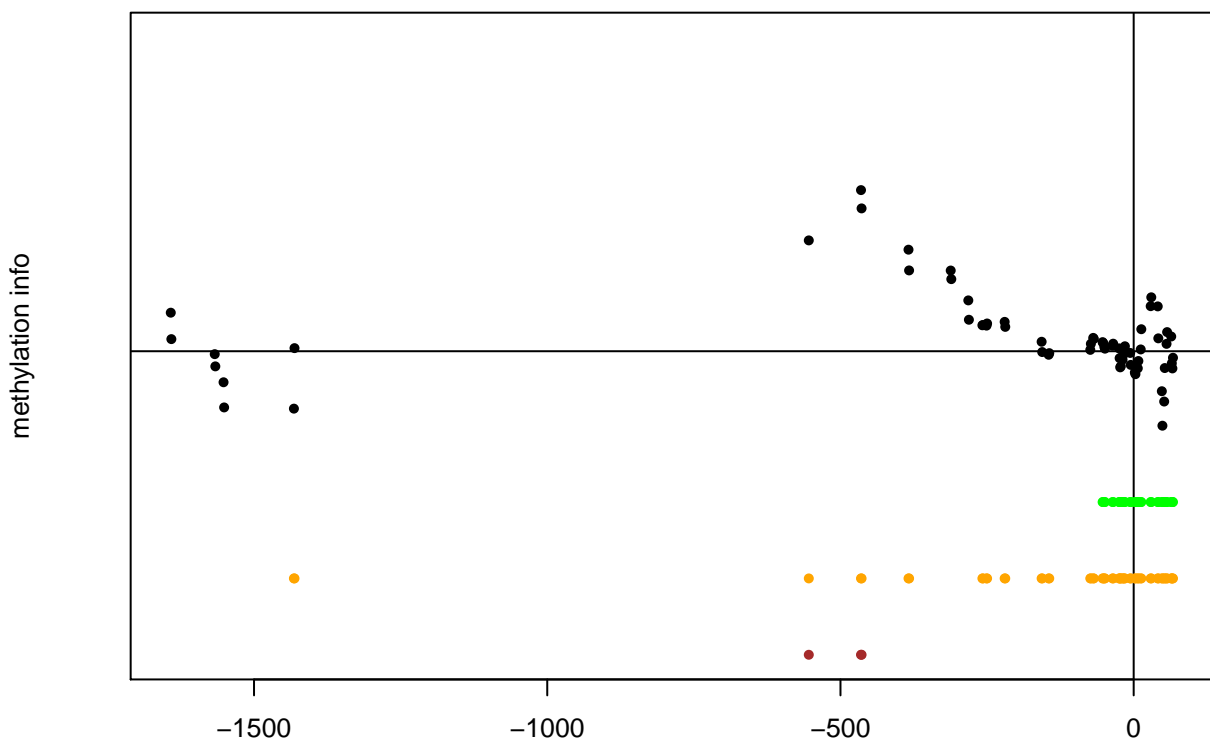

TMEM98 raw %methylation, red=UC, blue=Normal

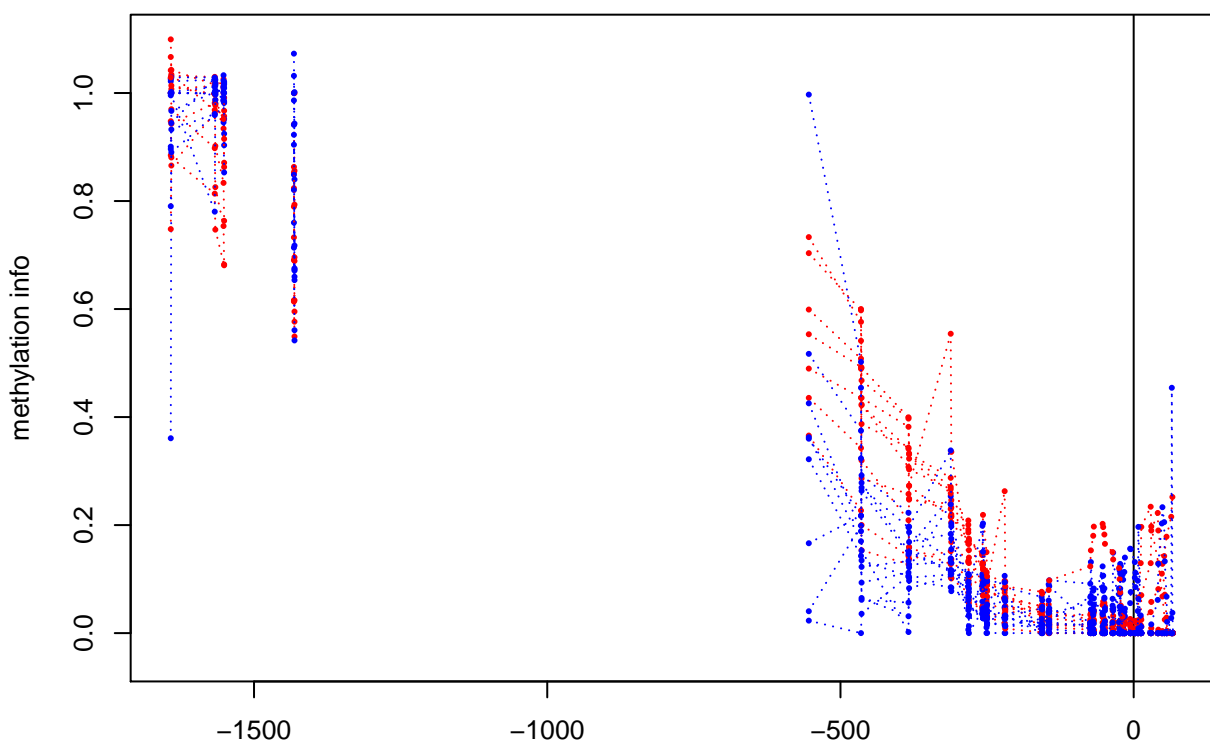

RNAseq logFC(UC-N)= -1

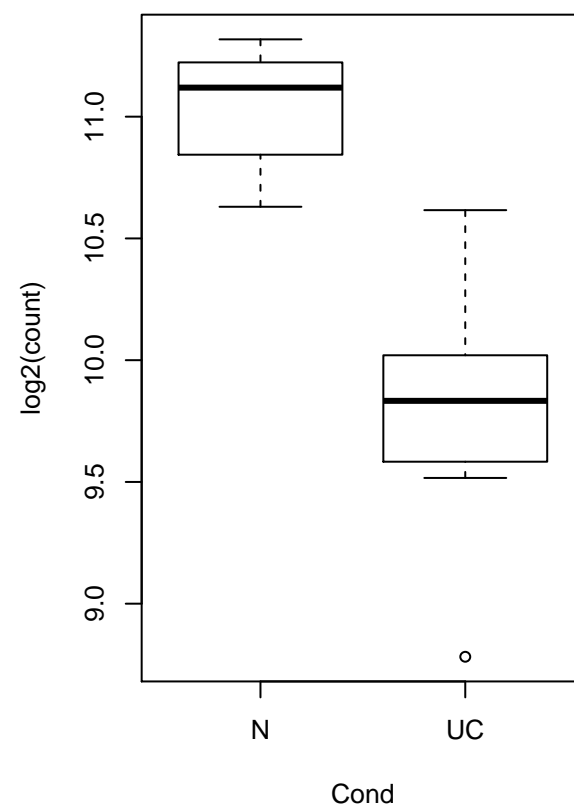

TMIGD1 average UC-N %methylation max=21.43% min=-3.15%

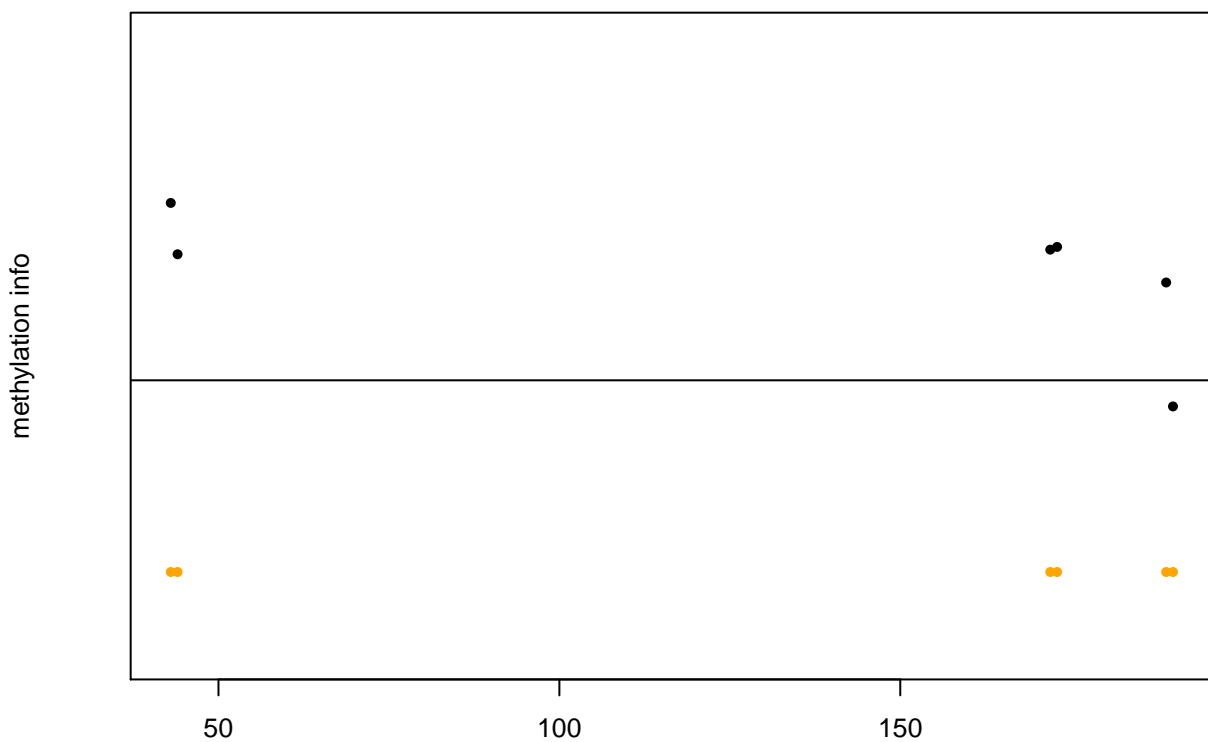

TMIGD1 raw %methylation, red=UC, blue=Normal

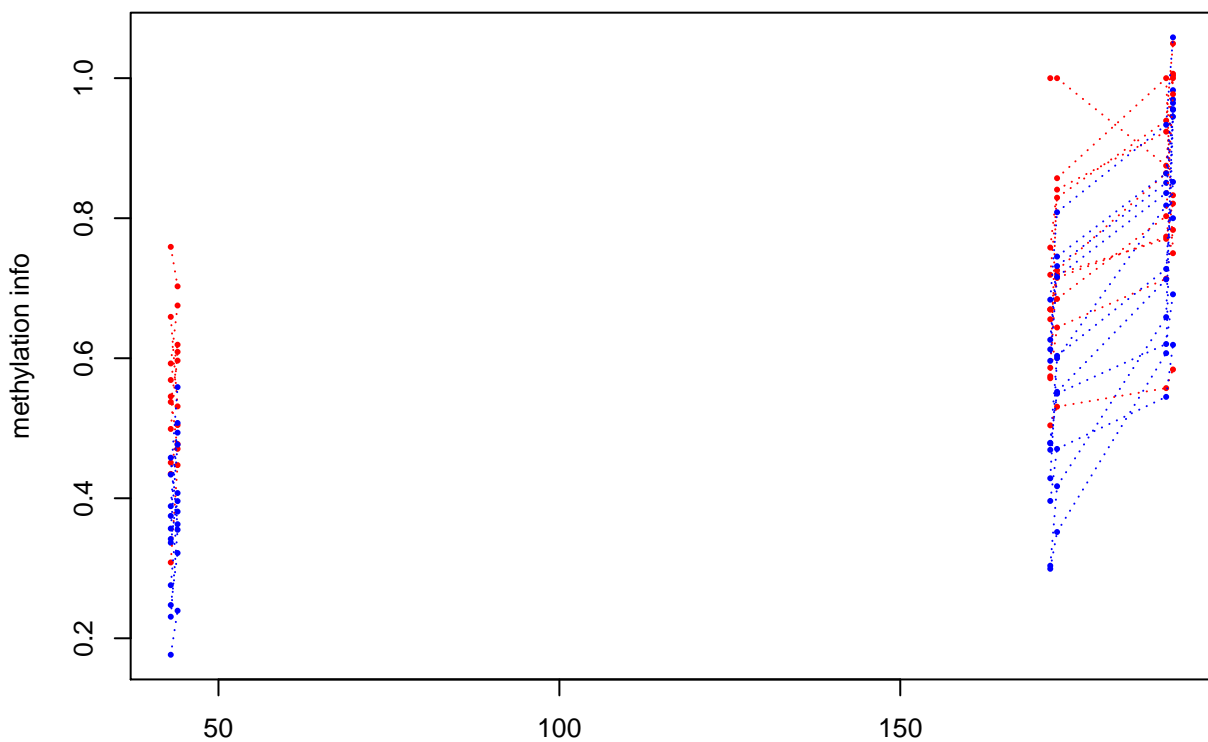

RNAseq logFC(UC-N) = -2.32

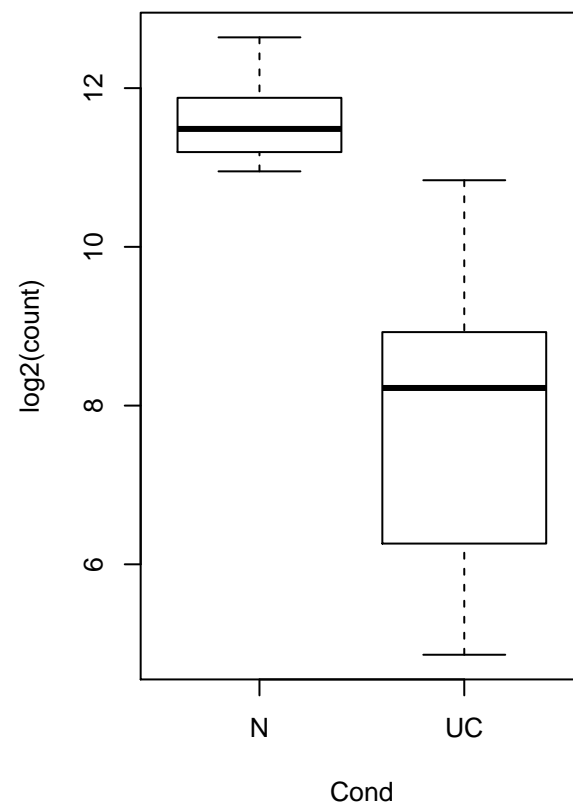

TNFRSF10C average UC-N %methylation max=-4.05% min=-18.97%

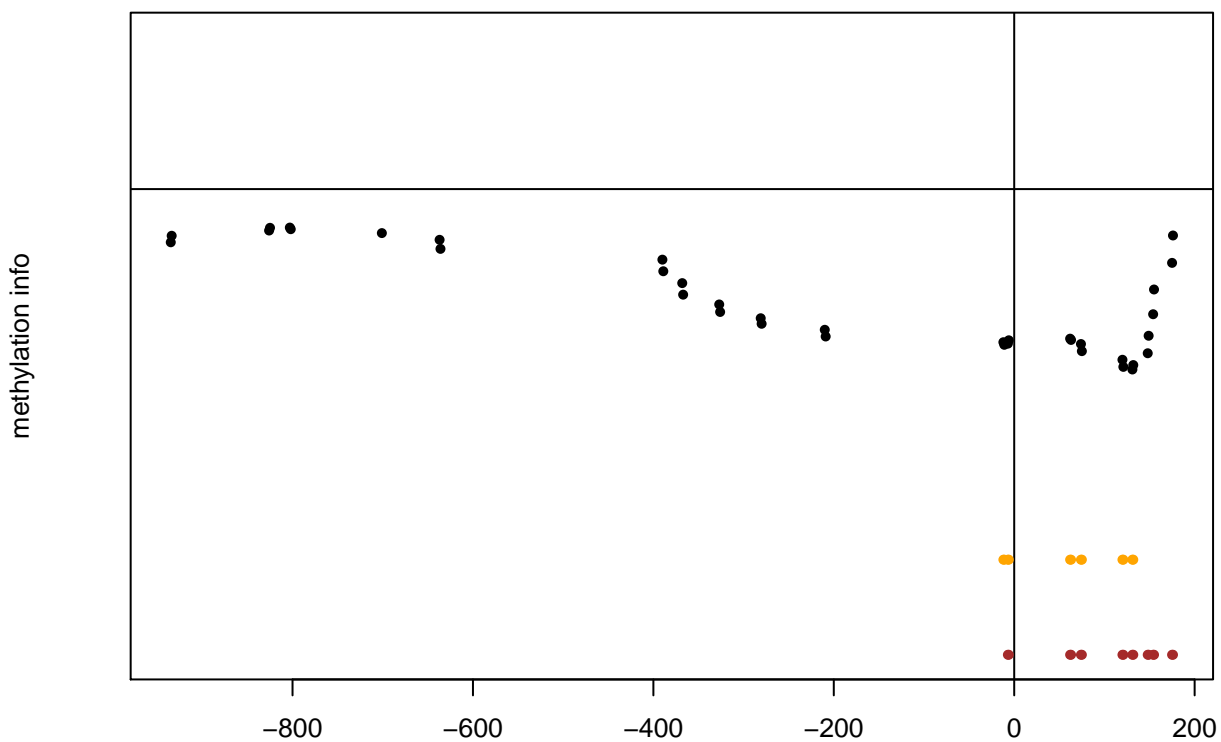

TNFRSF10C raw %methylation, red=UC, blue=Normal

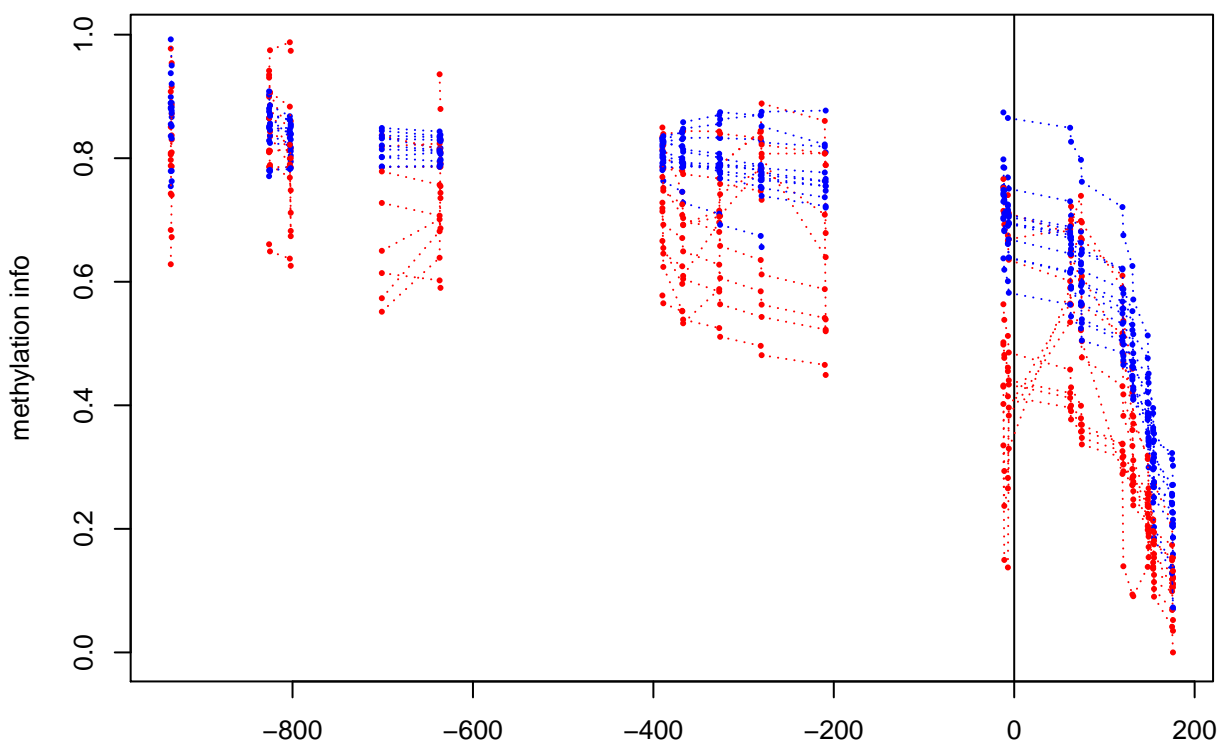

RNAseq logFC(UC-N)= 2.71

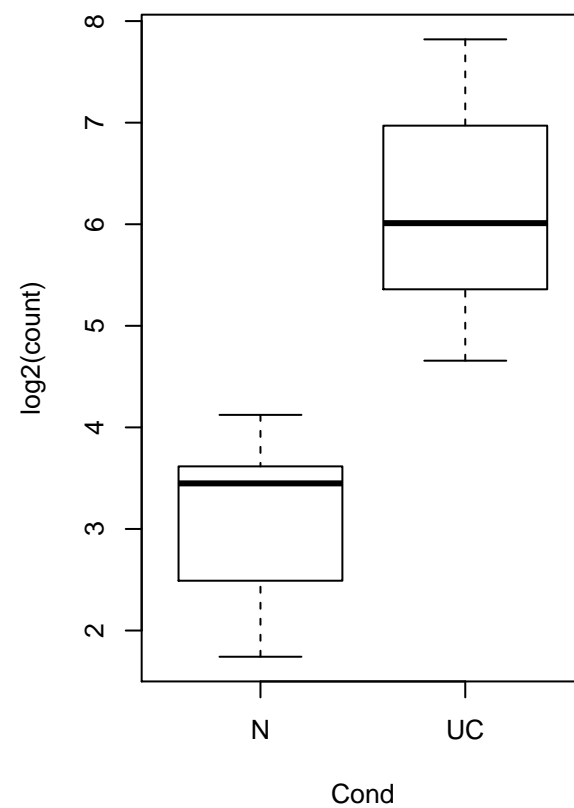

TNFRSF4 average UC-N %methylation max=-0.15% min=-16.13%

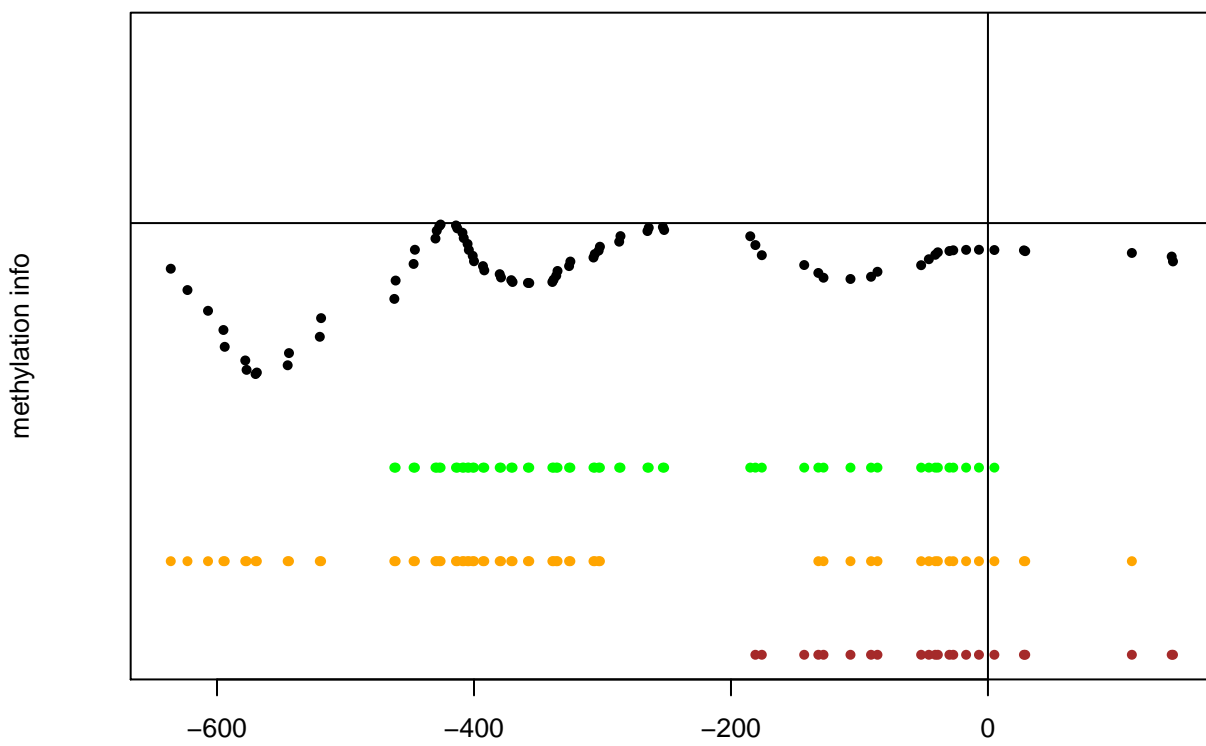

TNFRSF4 raw %methylation, red=UC, blue=Normal

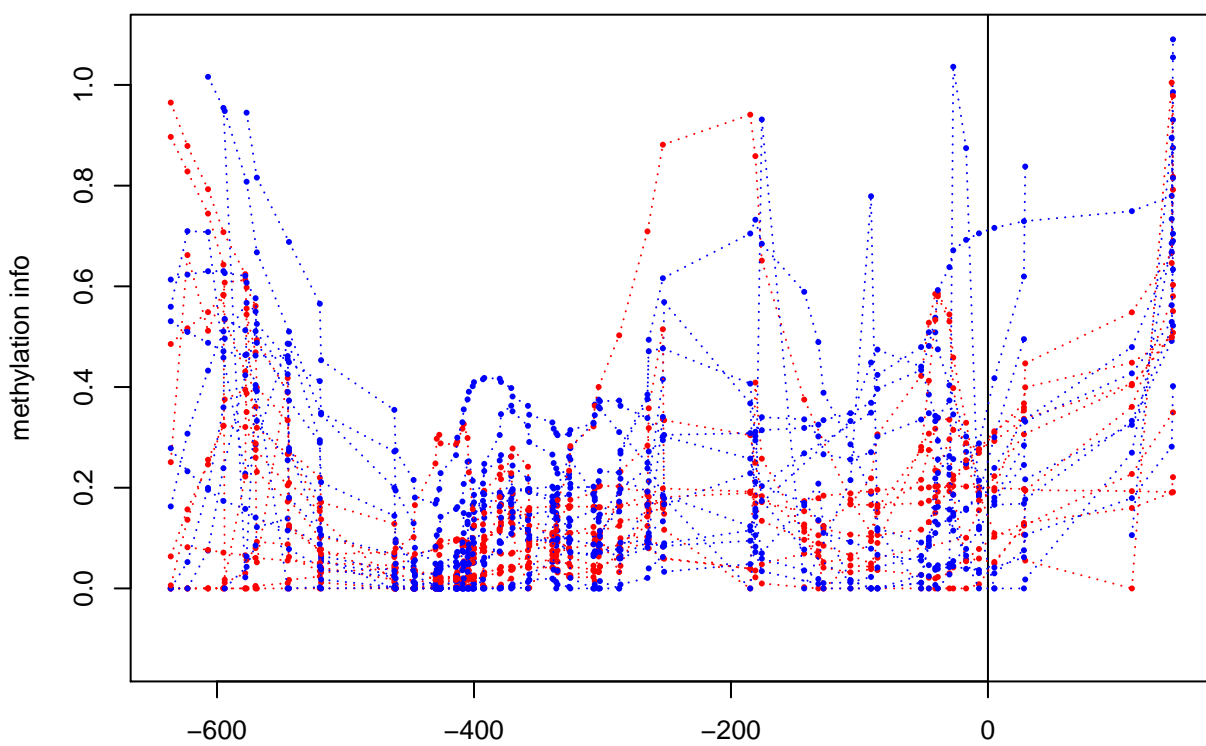

RNAseq logFC(UC-N)= 1.74

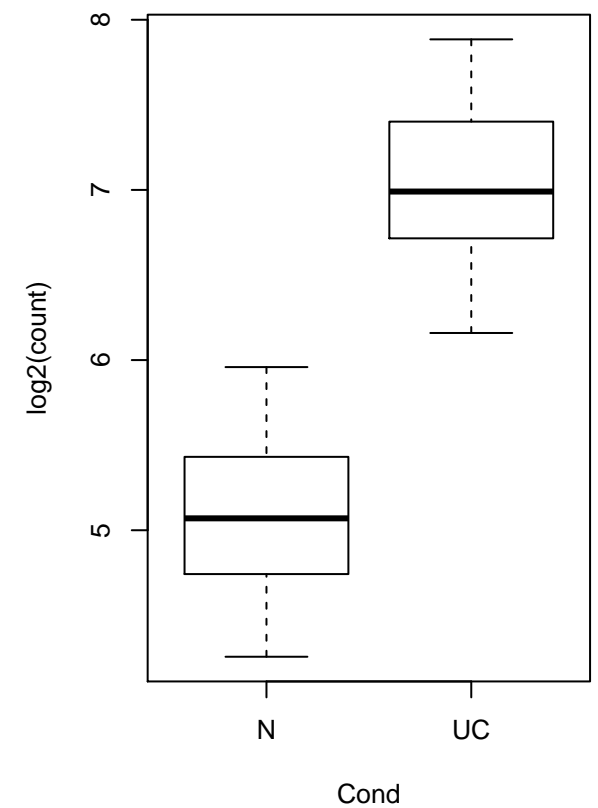

TNFRSF8 average UC-N %methylation max=4.97% min=-10.83%

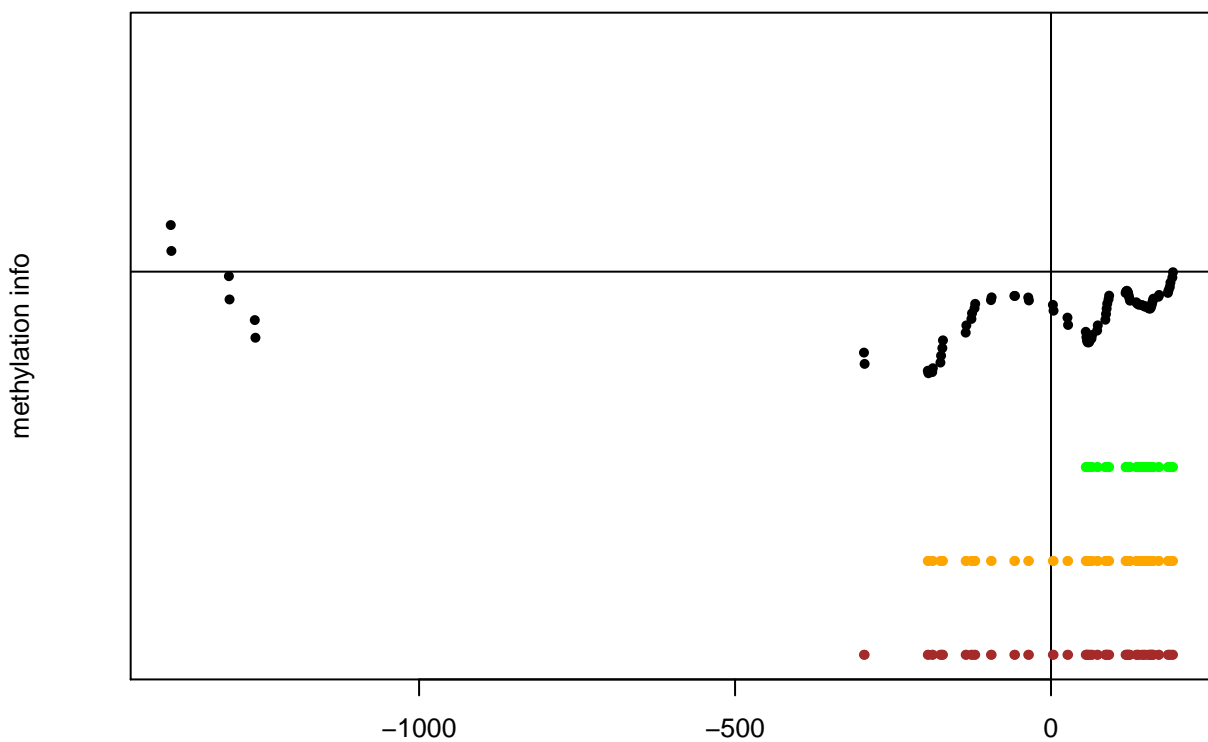

TNFRSF8 raw %methylation, red=UC, blue=Normal

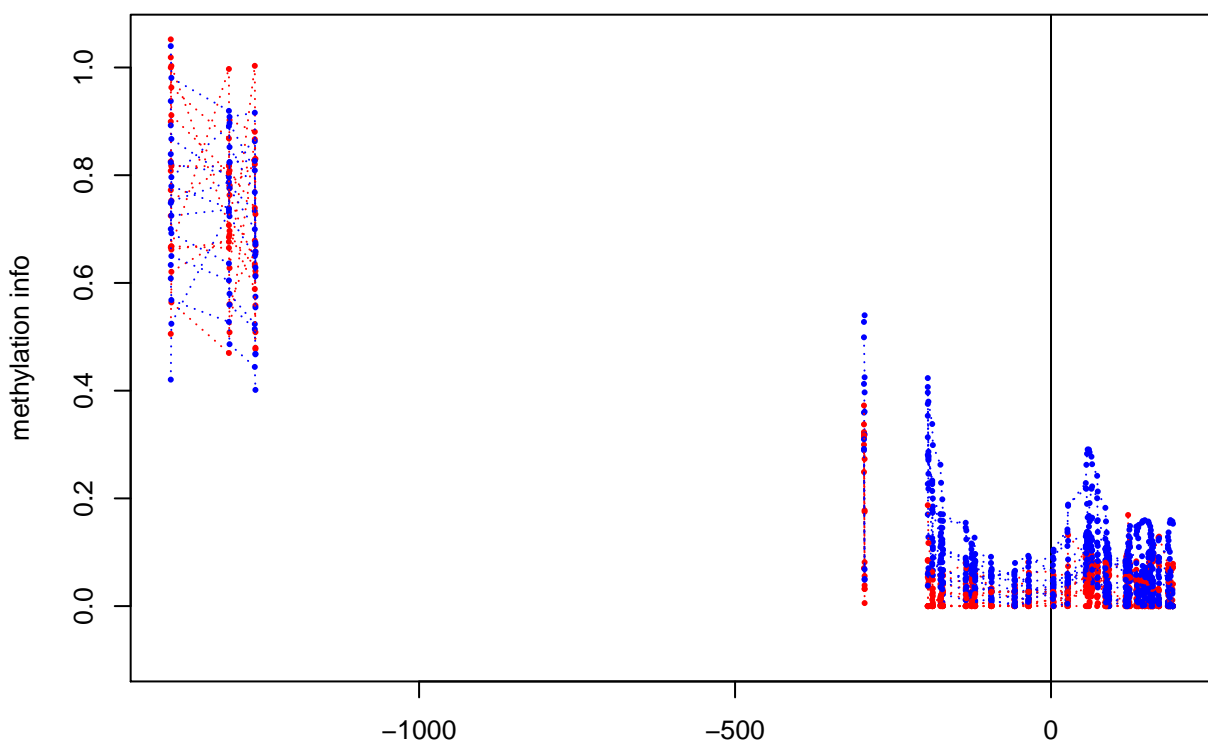

RNAseq logFC(UC-N)= 2.57

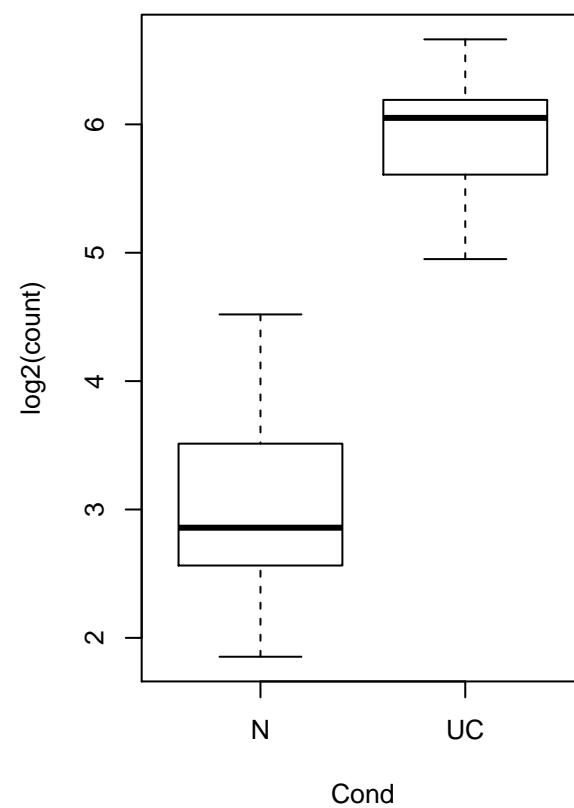



TNFRSF9 average UC-N %methylation max=-15.47% min=-26.35%

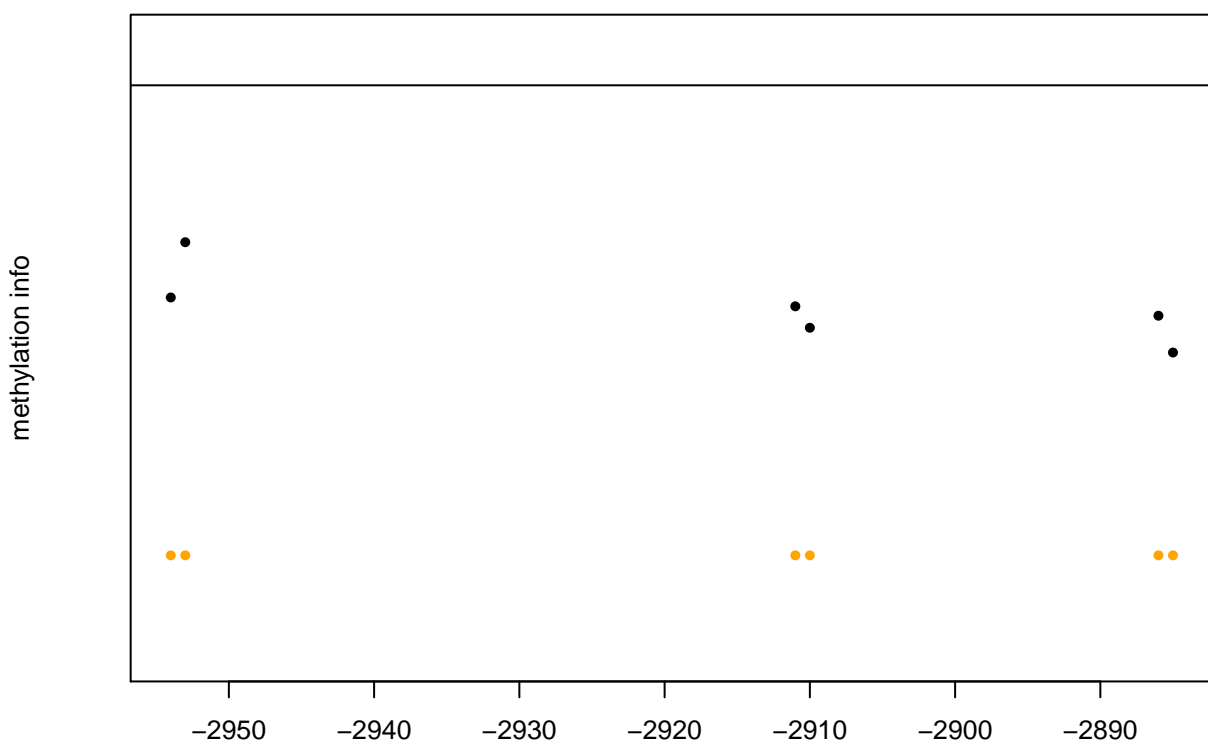

TNFRSF9 raw %methylation, red=UC, blue=Normal

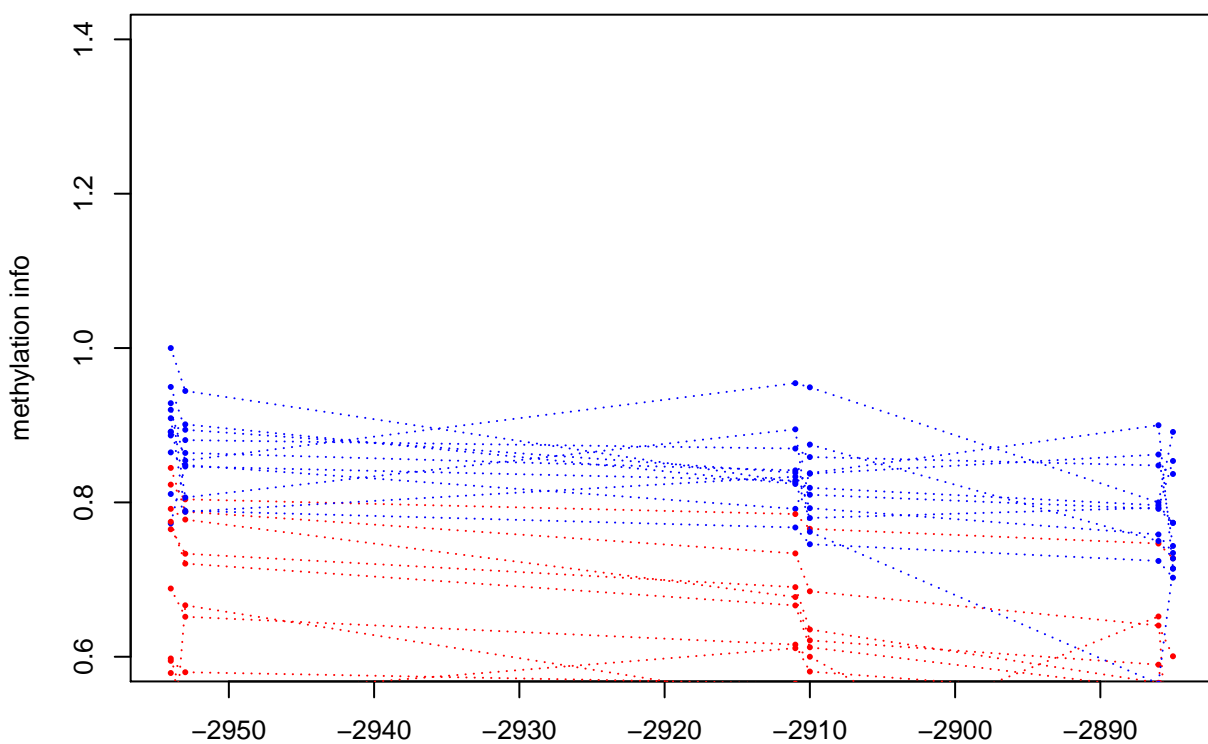

RNAseq logFC(UC-N)= 2.92

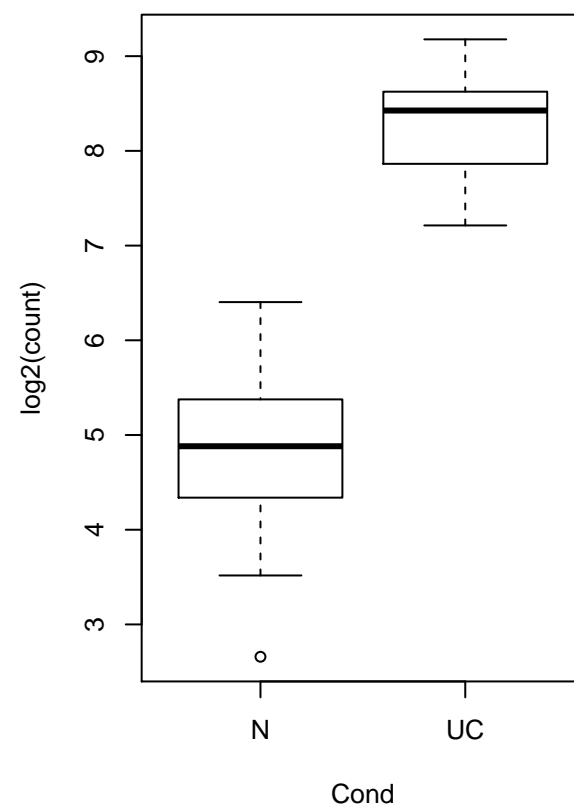

TNFSF14 average UC-N %methylation max=-18.15% min=-43.28%

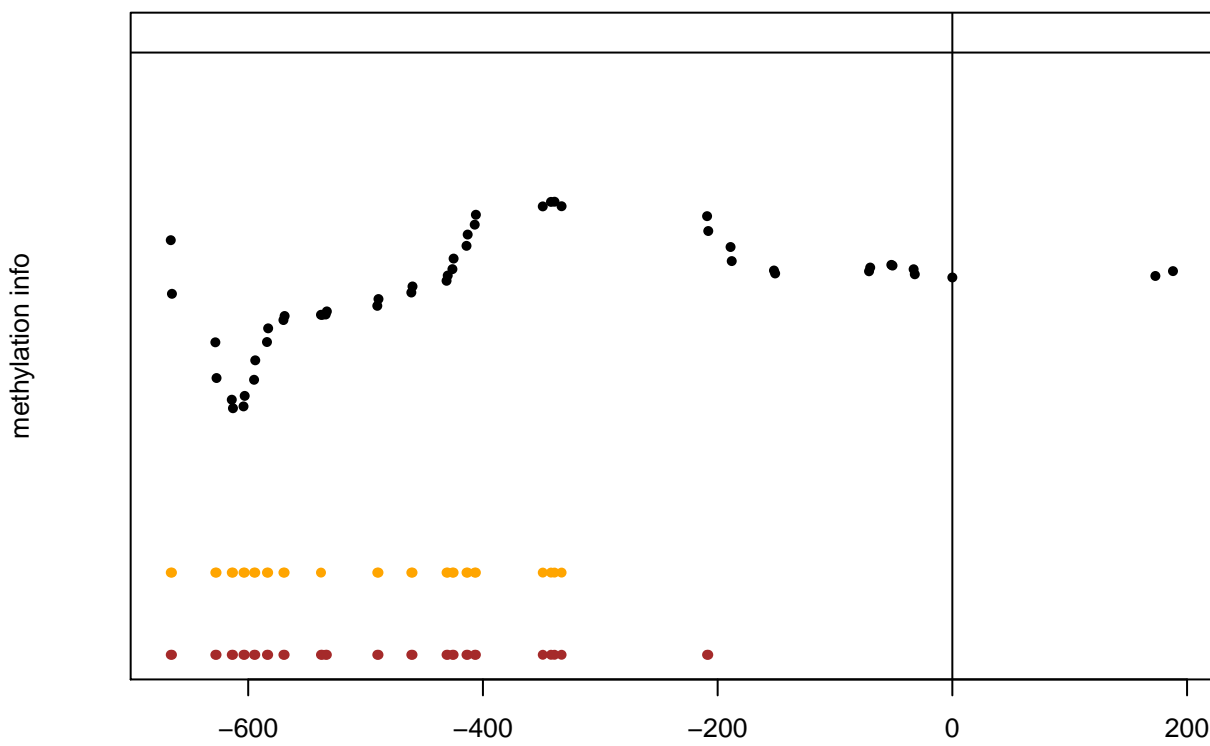

TNFSF14 raw %methylation, red=UC, blue=Normal

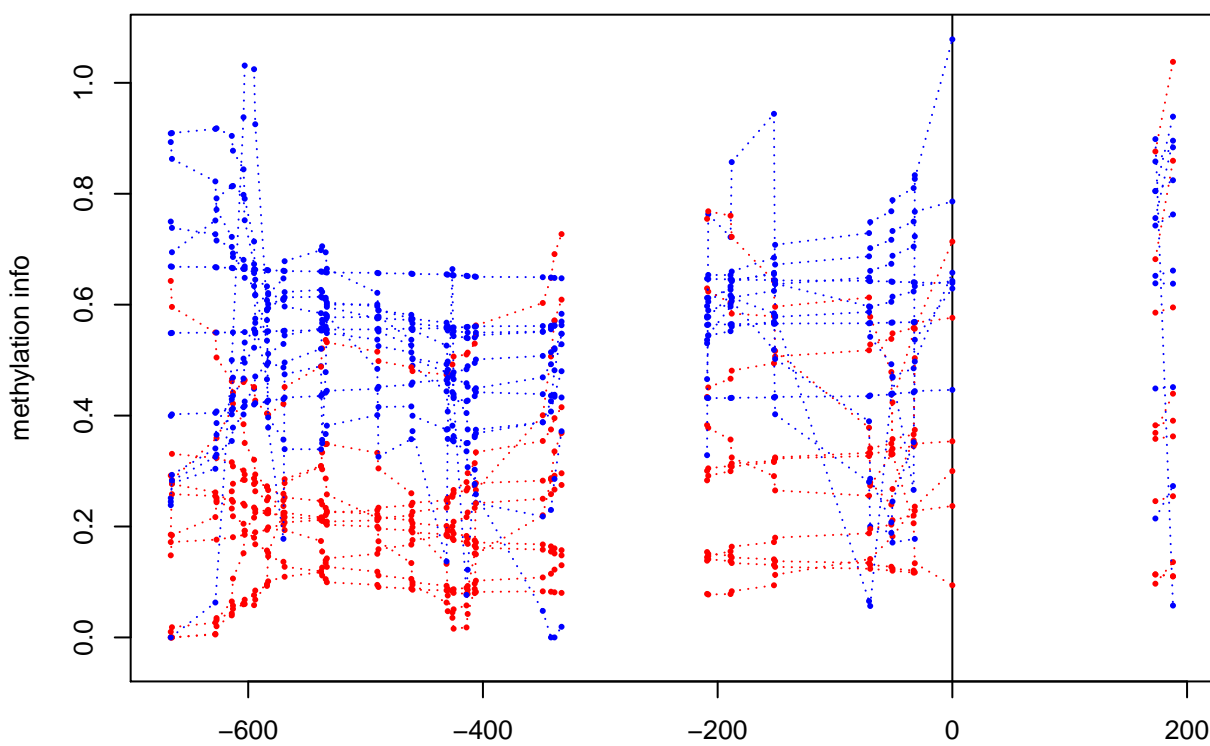

RNAseq logFC(UC-N)= 1.69

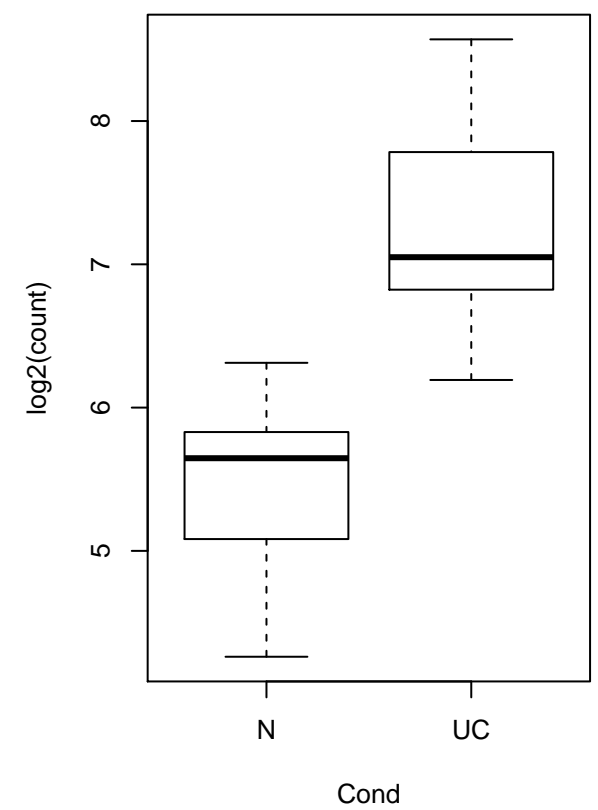

TNFSF8 average UC-N %methylation max=-25.8% min=-42.66%

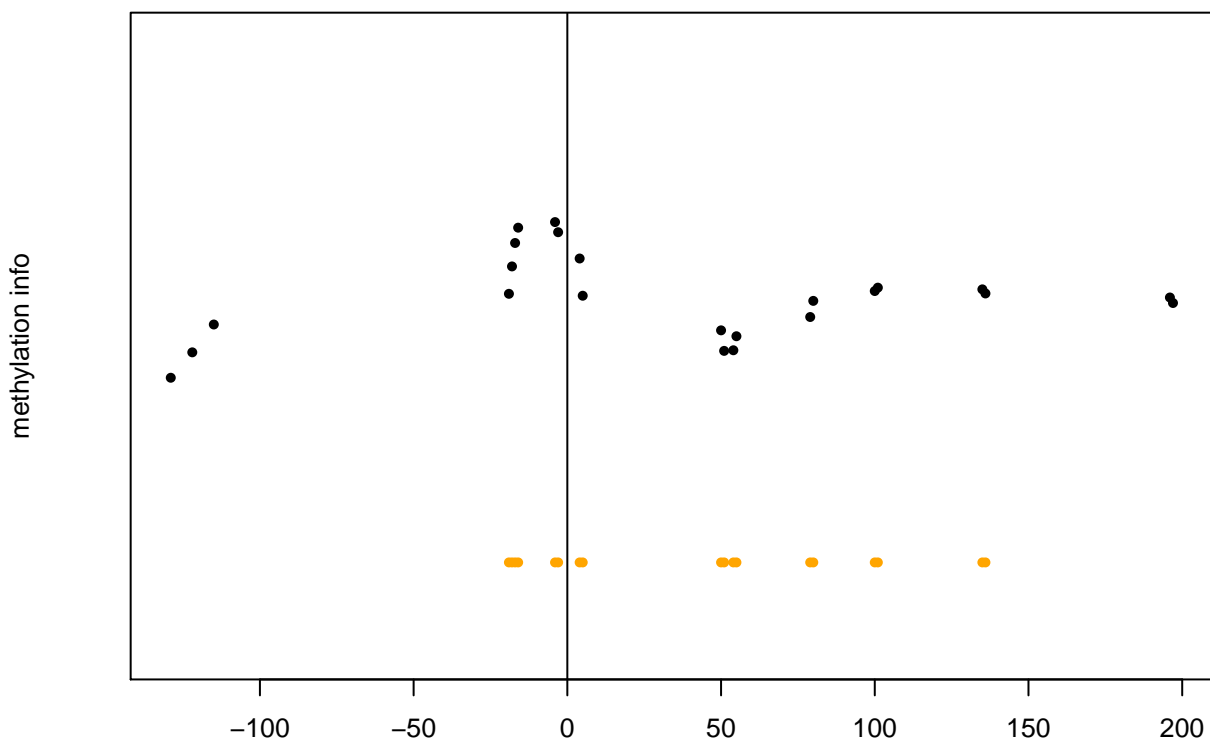

TNFSF8 raw %methylation, red=UC, blue=Normal

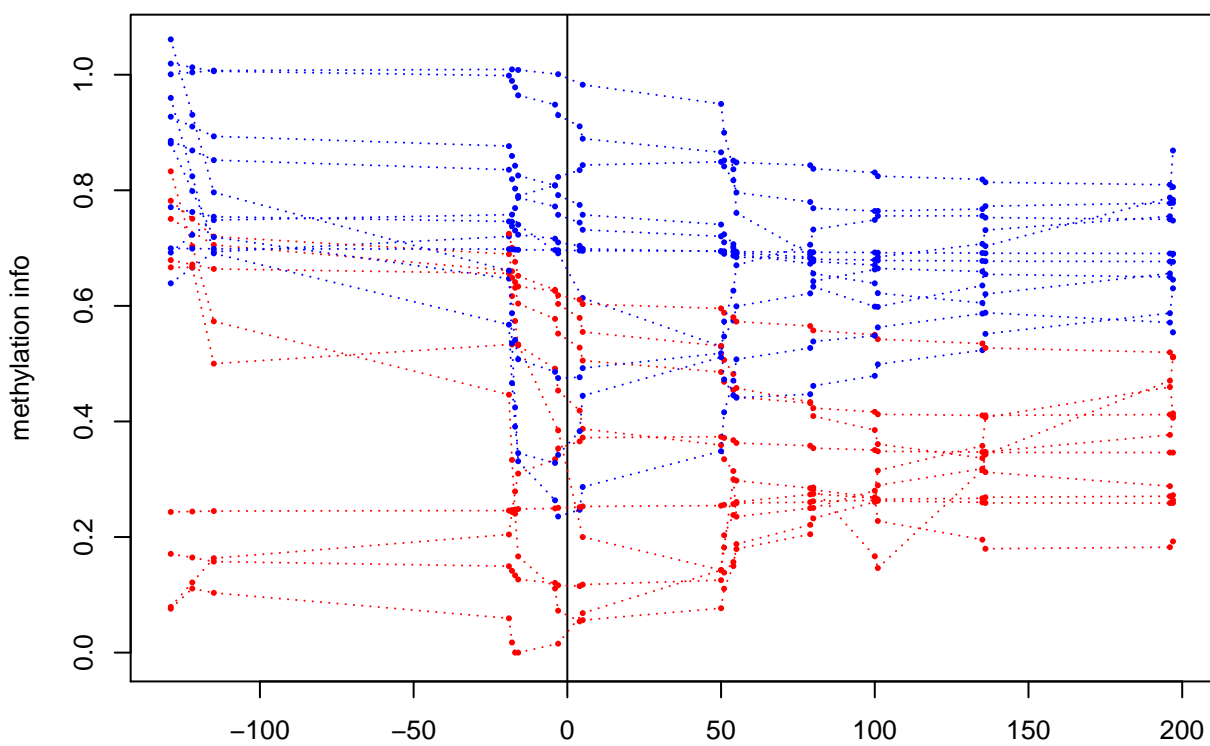

RNAseq logFC(UC-N)= 1.02

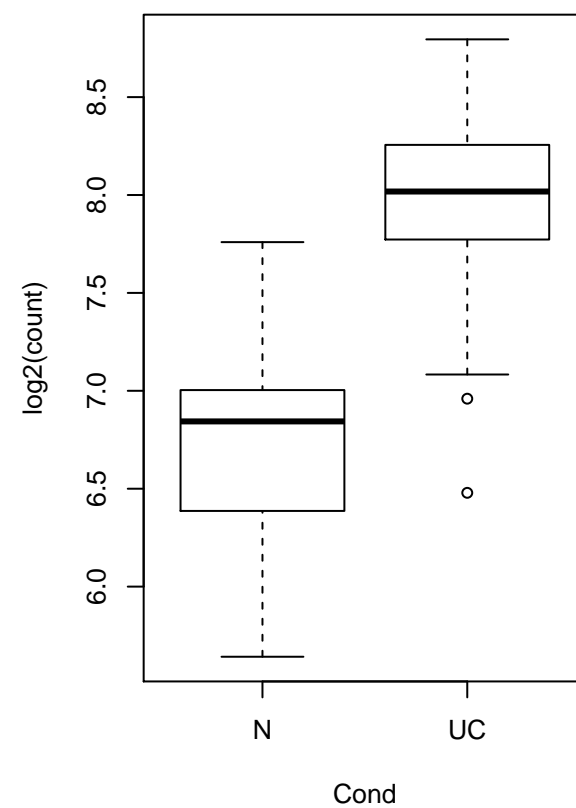

TP63 average UC-N %methylation max=-0.38% min=-18.88%

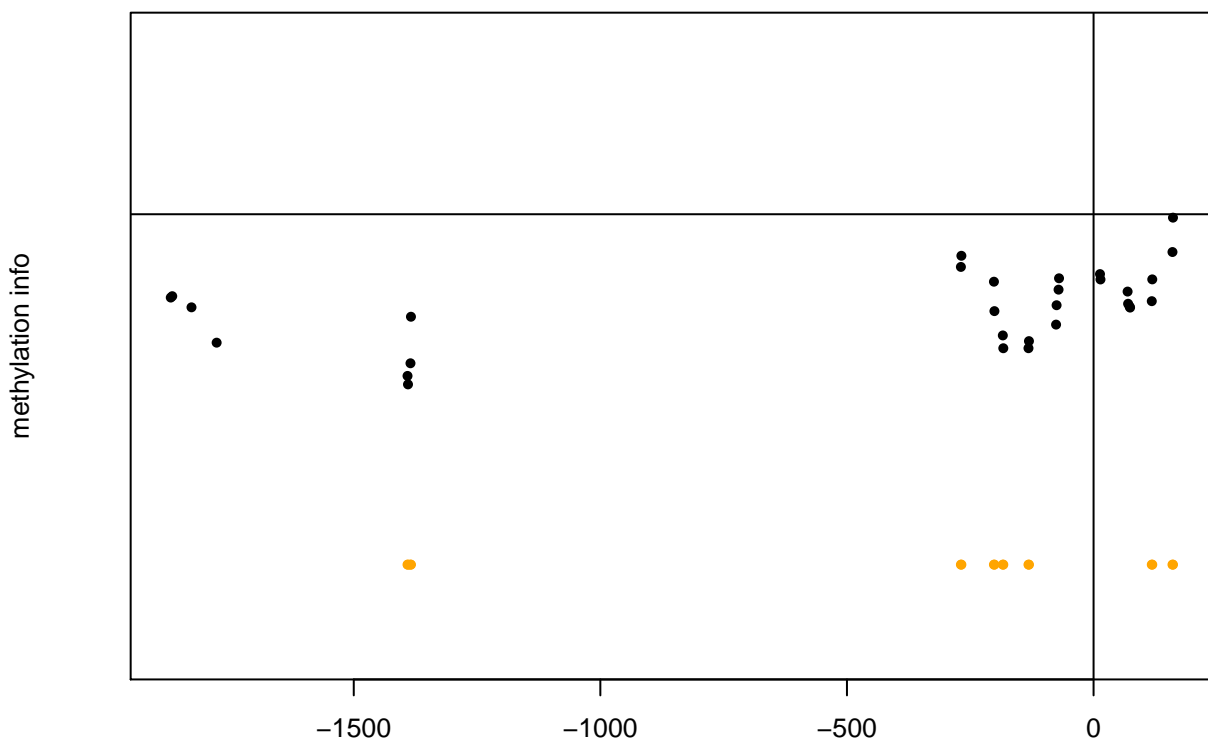

TP63 raw %methylation, red=UC, blue=Normal

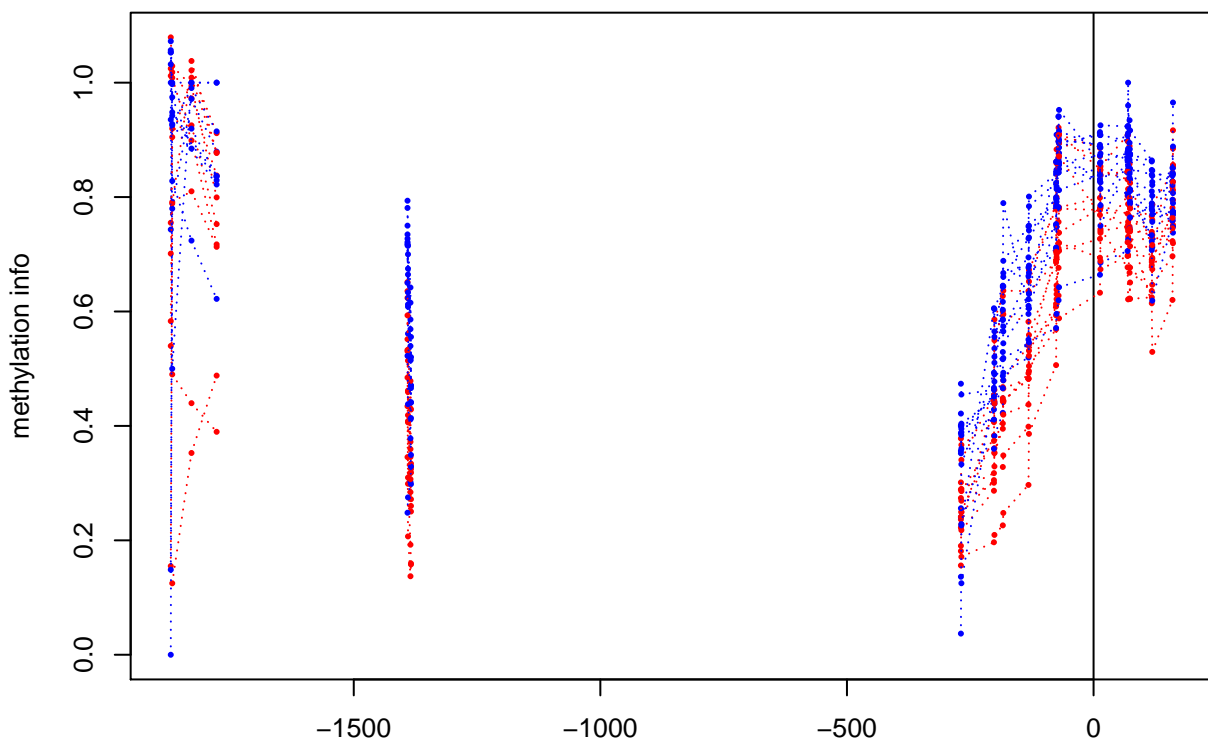

RNAseq logFC(UC-N)= 1.25

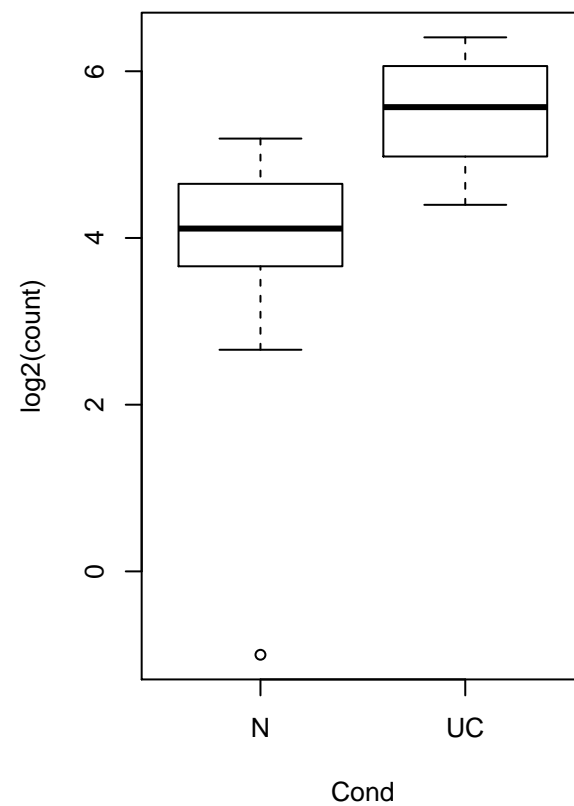

TRAF3IP3 average UC-N %methylation max=-5.4% min=-37.43%

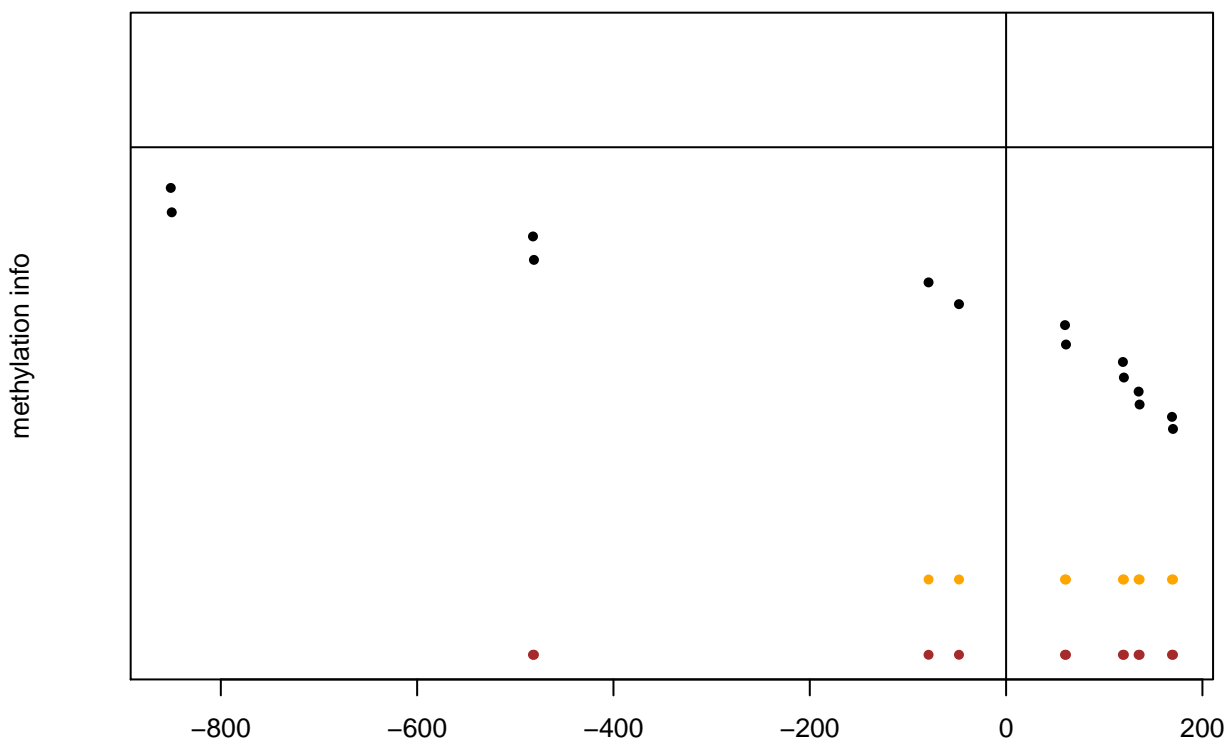

TRAF3IP3 raw %methylation, red=UC, blue=Normal

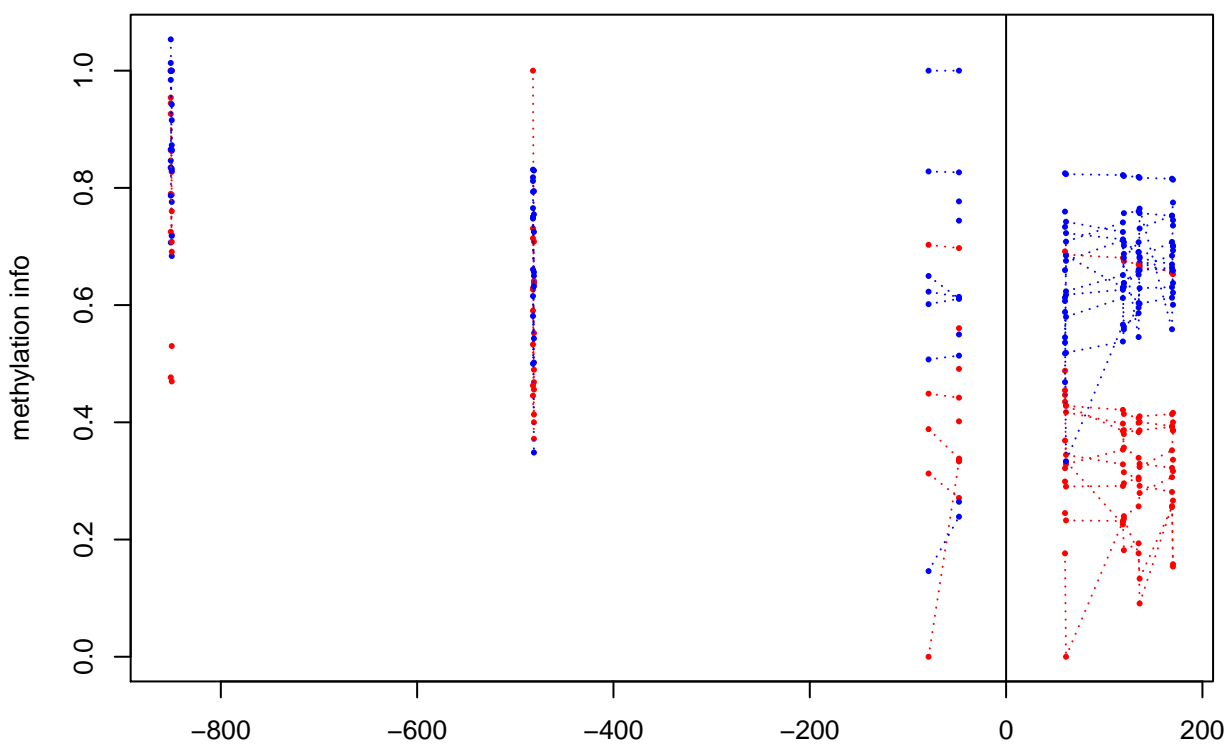

RNAseq logFC(UC-N)= 1.22

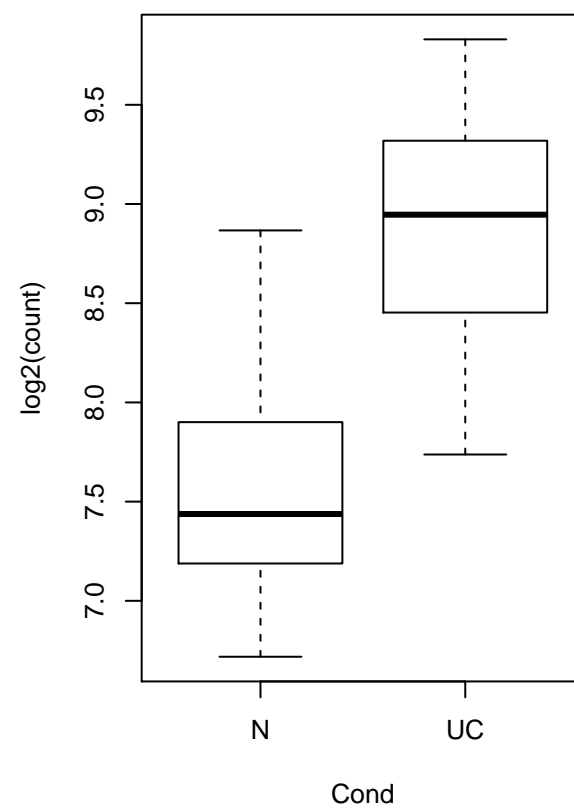

TRIM22 average UC-N %methylation max=1.17% min=-22.83%

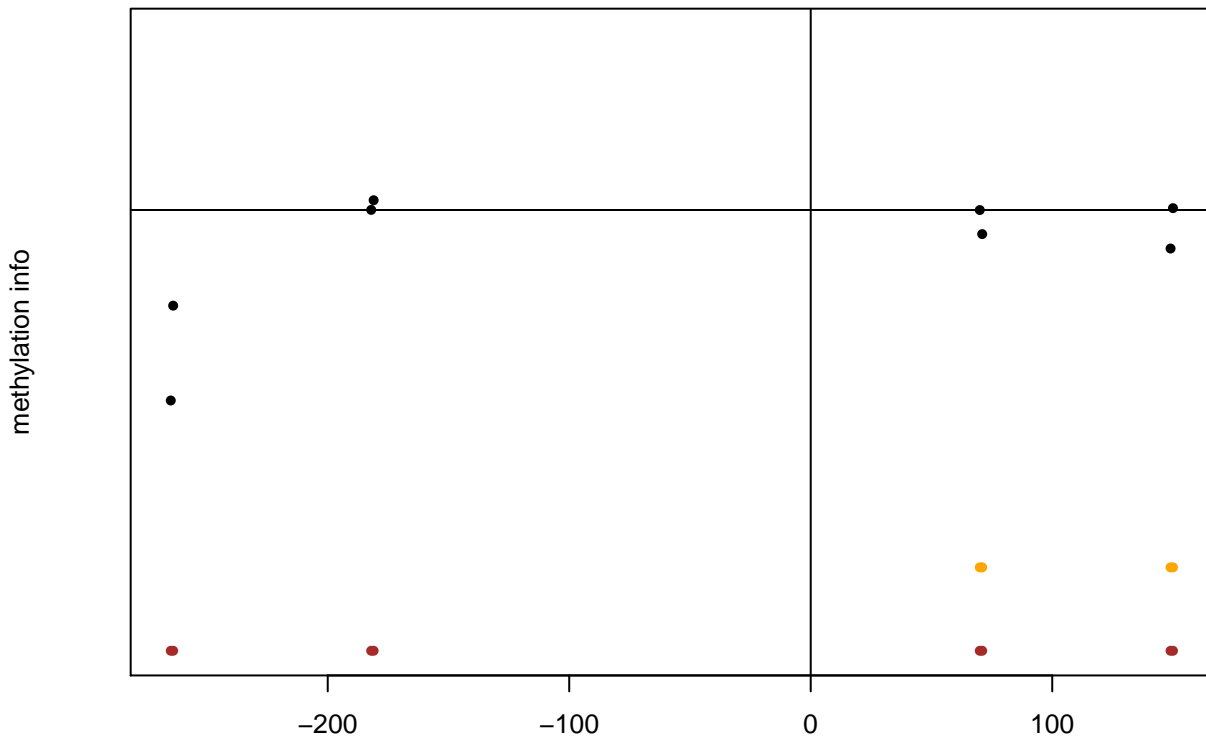

TRIM22 raw %methylation, red=UC, blue=Normal

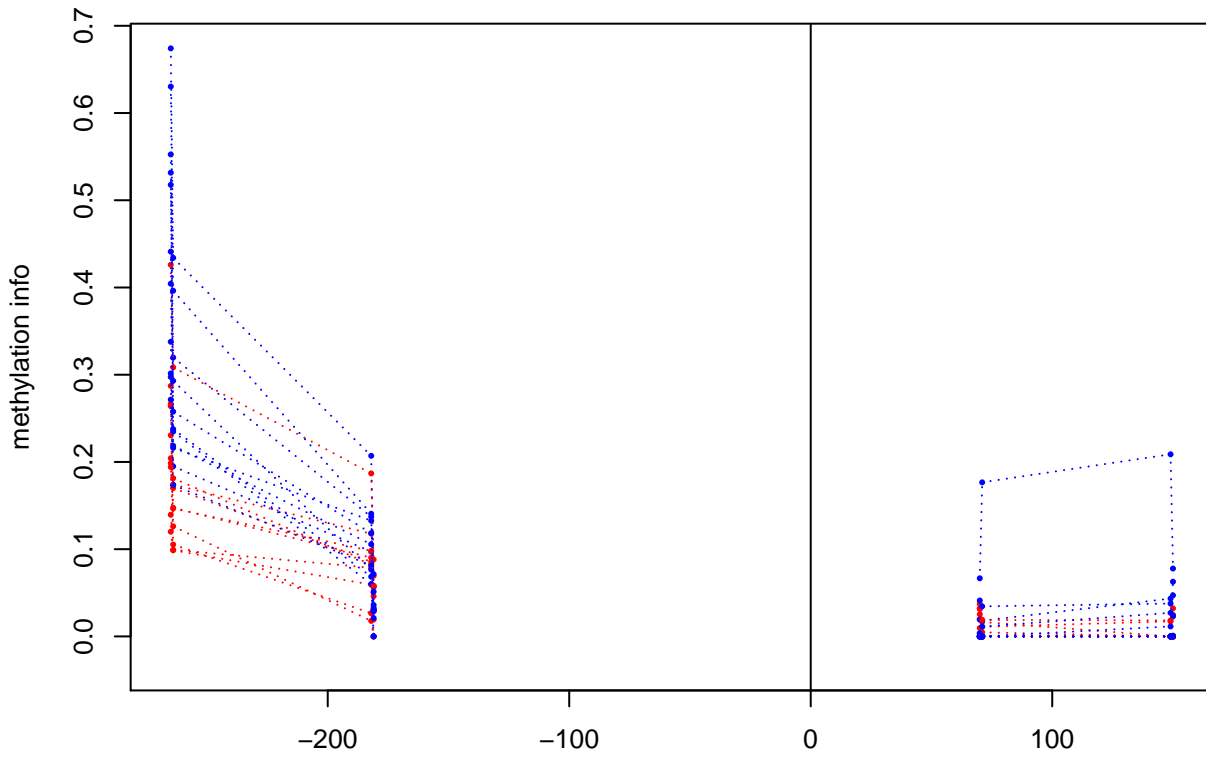

RNAseq logFC(UC-N)= 1.45

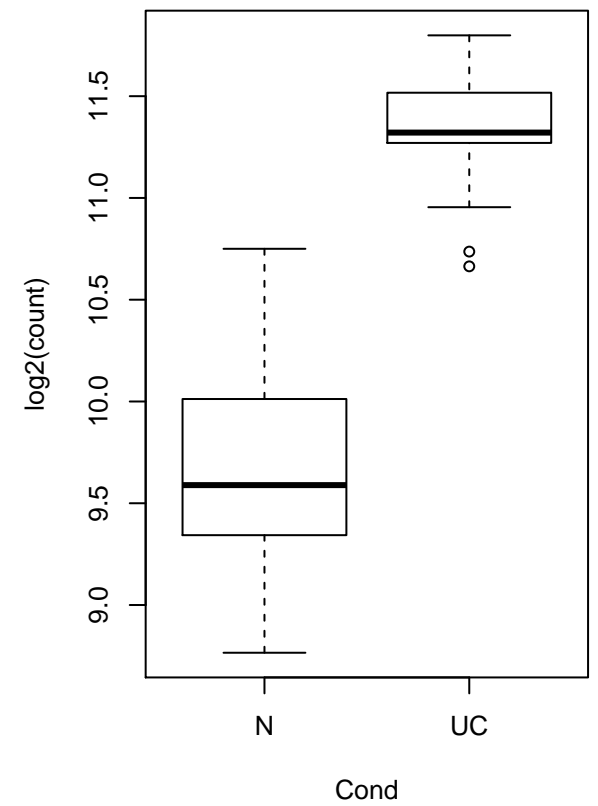

TRIM36 average UC-N %methylation max=5.59% min=-3.56%

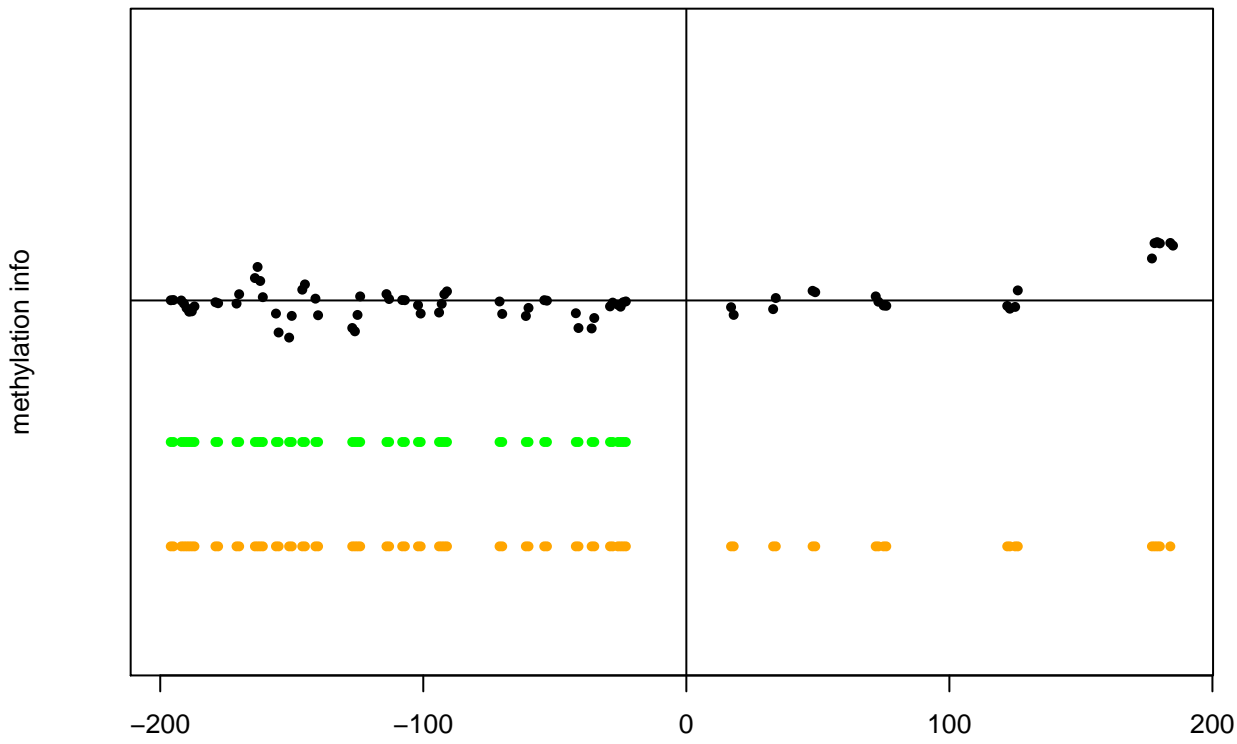

TRIM36 raw %methylation, red=UC, blue=Normal

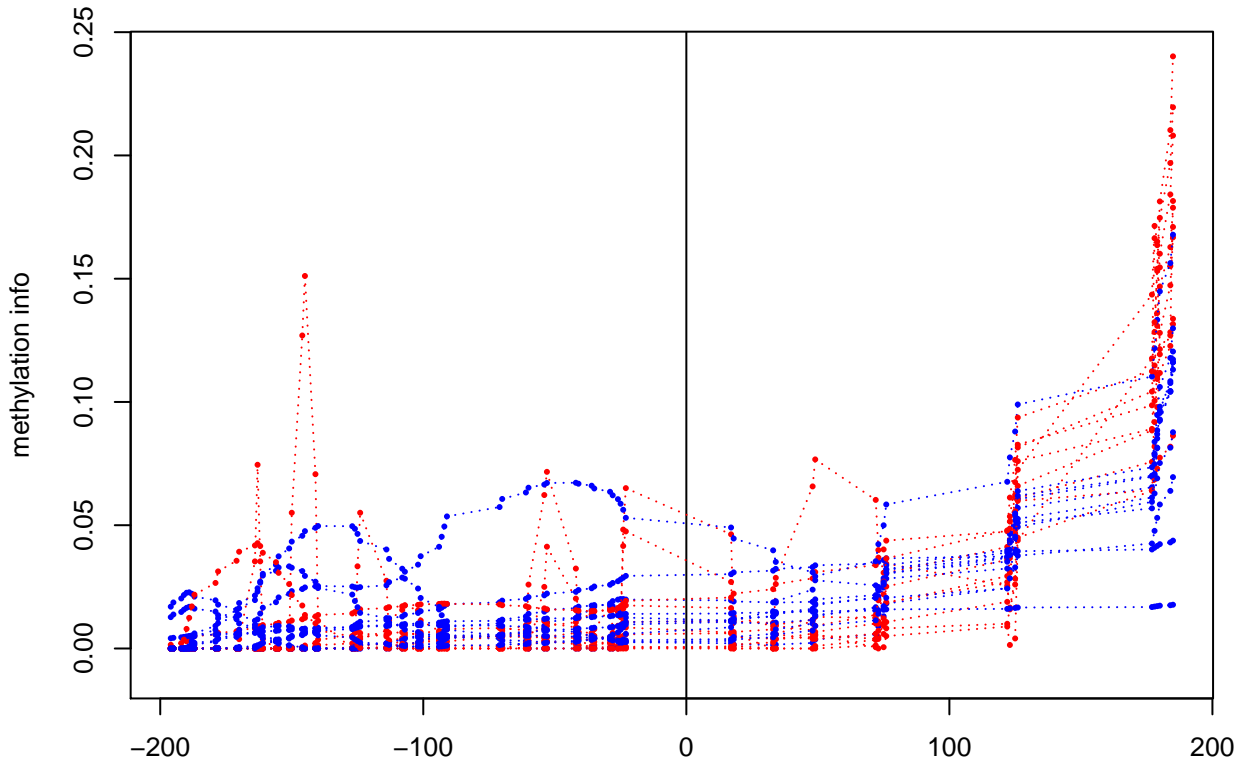

RNAseq logFC(UC-N)= -1.18

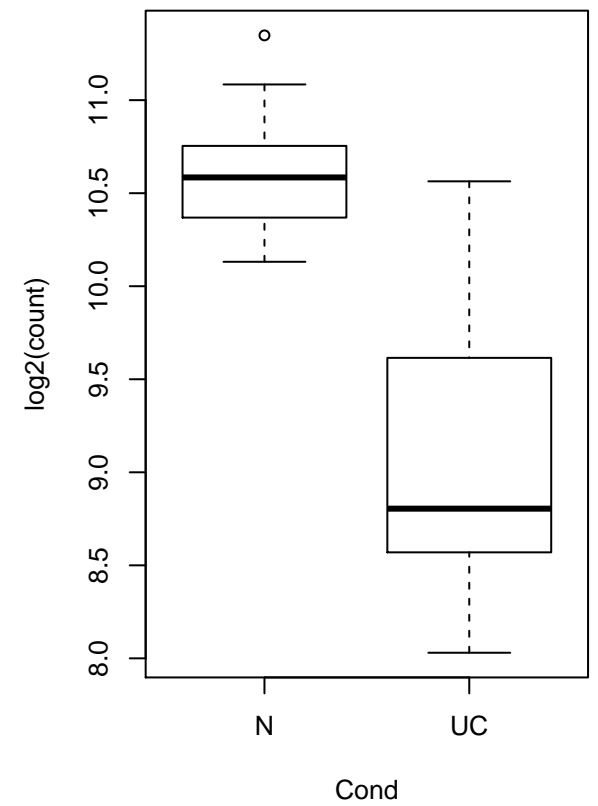

UBASH3A average UC-N %methylation max=26.4% min=-20.82%

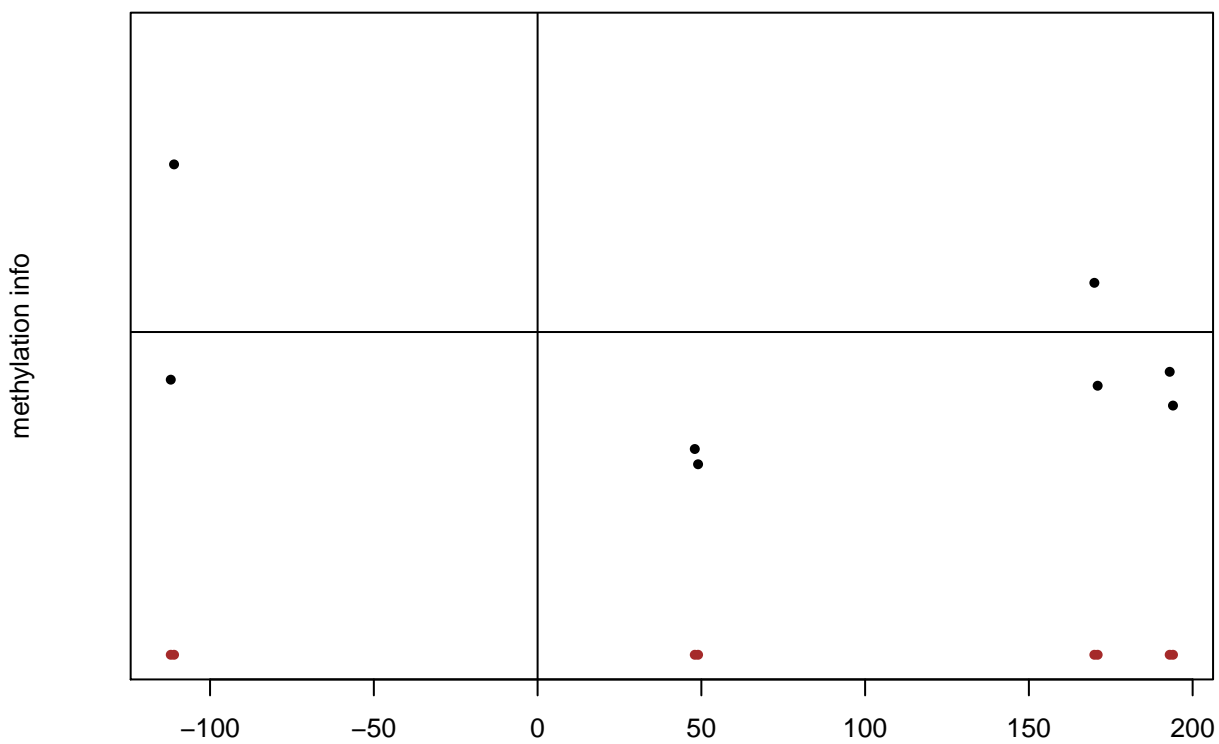

UBASH3A raw %methylation, red=UC, blue=Normal

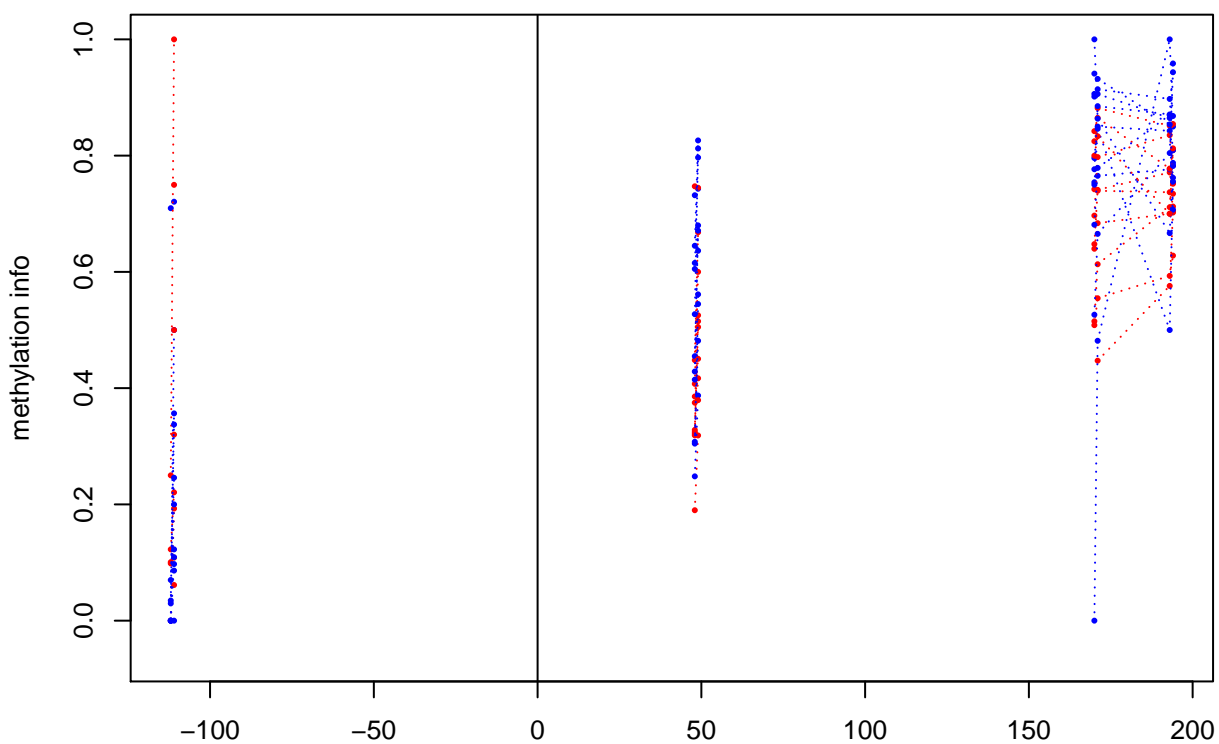

RNAseq logFC(UC-N)= 1.06

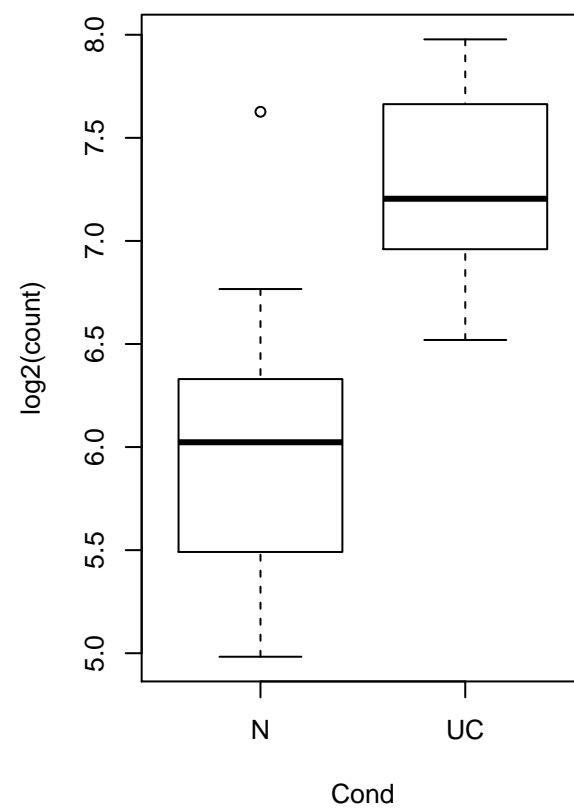



UCP2 average UC-N %methylation max=4.61% min=-25.32%

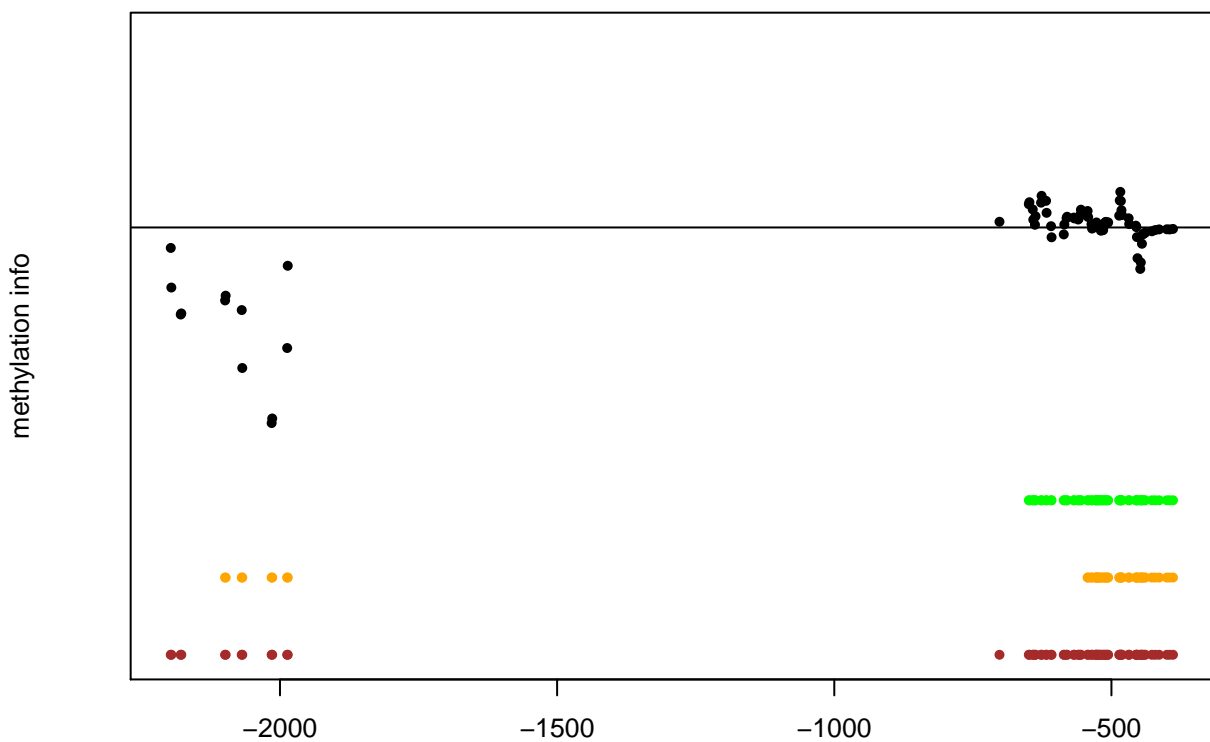

UCP2 raw %methylation, red=UC, blue=Normal

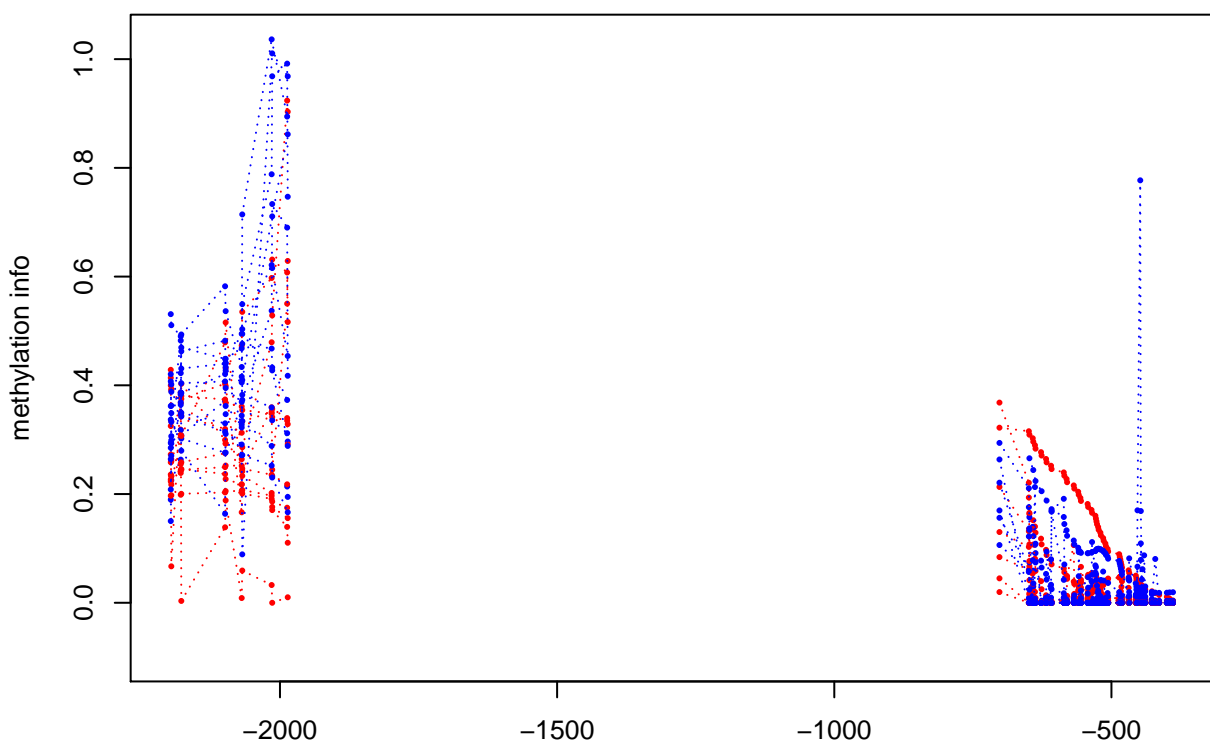

RNAseq logFC(UC-N)= 1.08

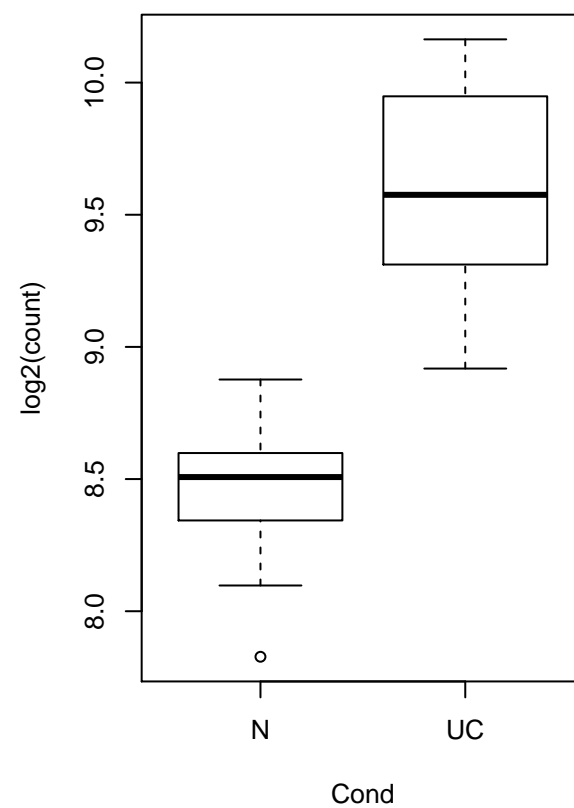

UGT1A10 average UC-N %methylation max=21.65% min=-7.75%

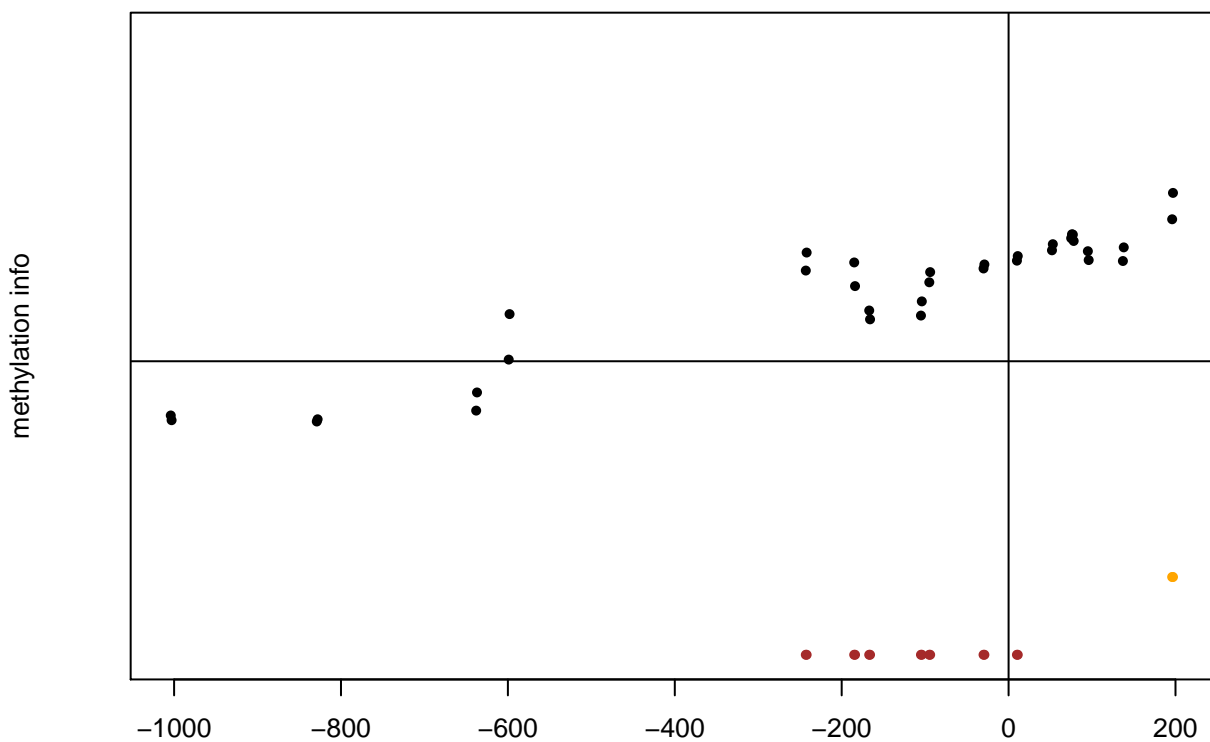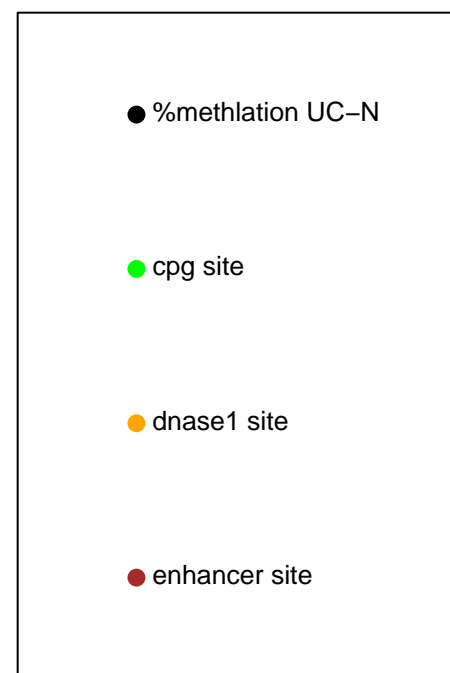

UGT1A10 raw %methylation, red=UC, blue=Normal

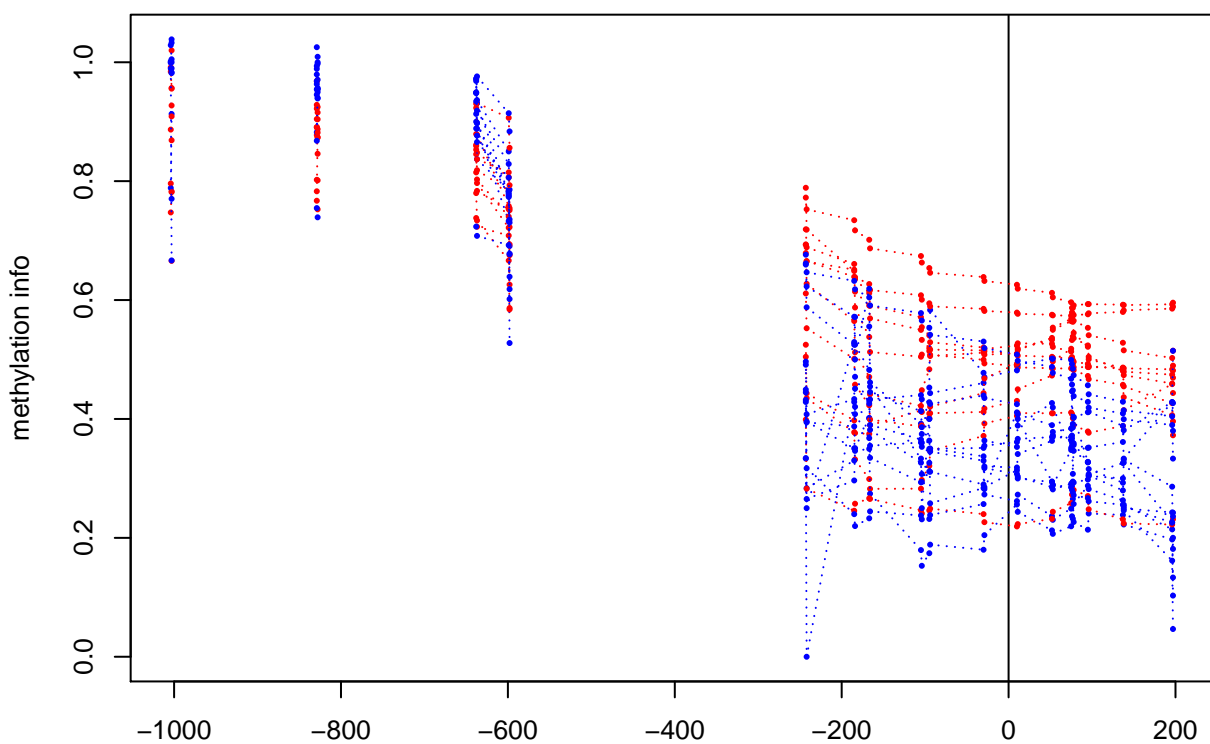

RNAseq logFC(UC-N)= -1.79

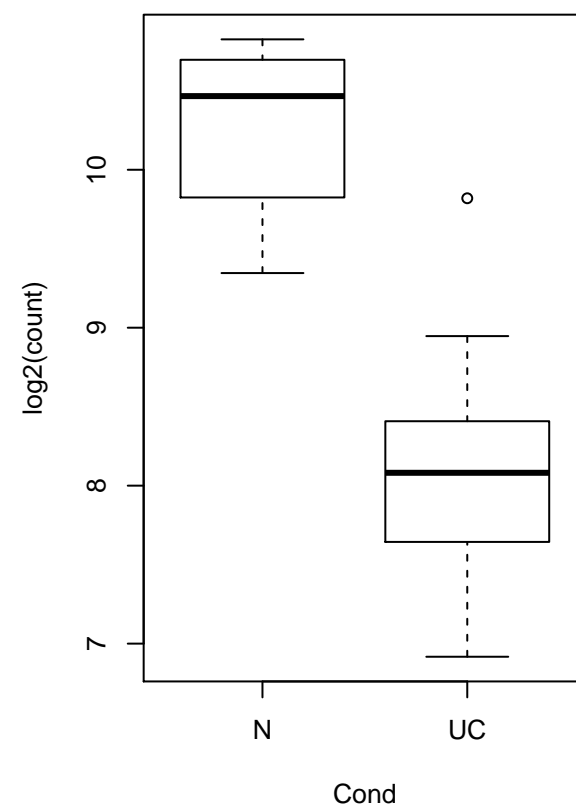

UGT1A8 average UC-N %methylation max=26.79% min=-38.1%

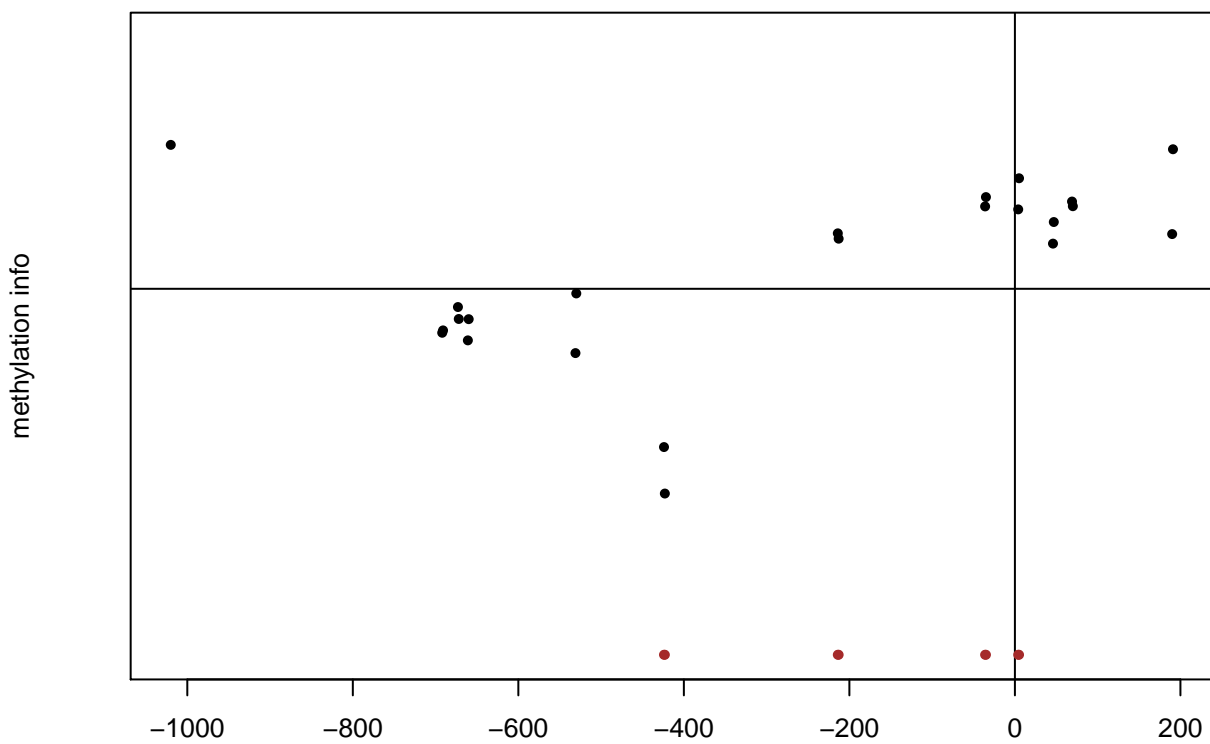

UGT1A8 raw %methylation, red=UC, blue=Normal

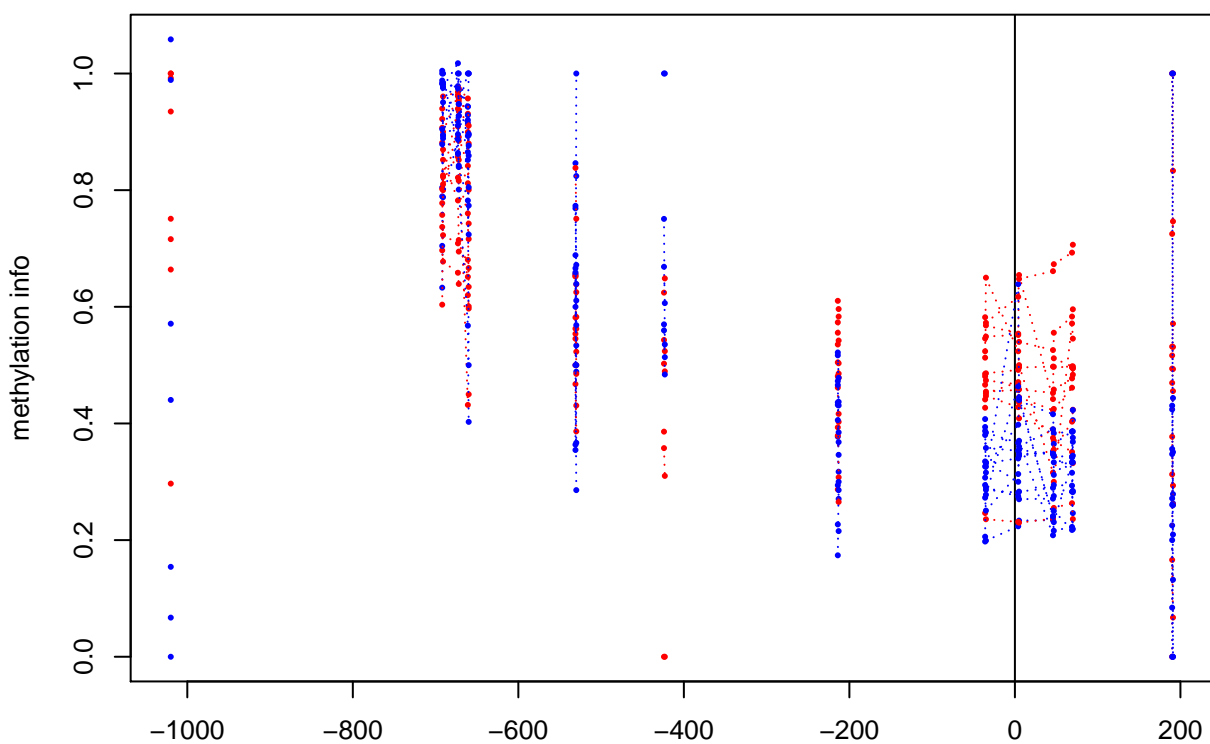

RNAseq logFC(UC-N)= -1.85

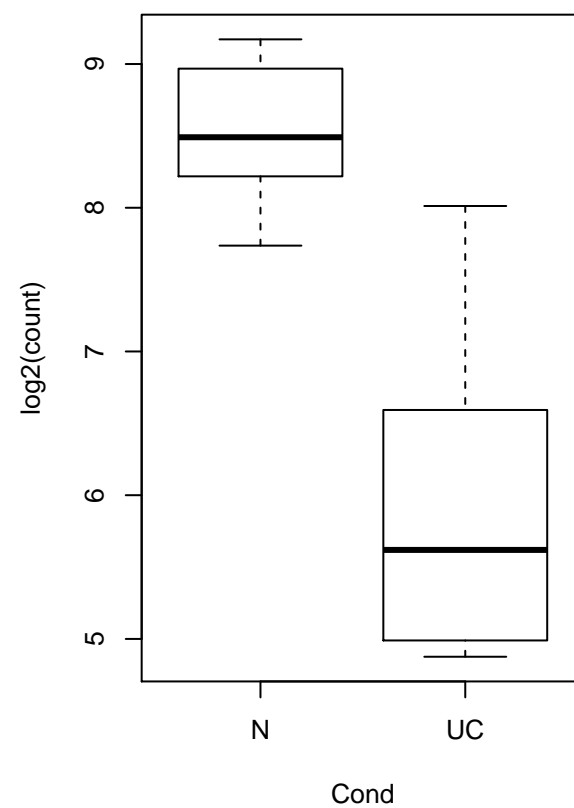

USP6 average UC-N %methylation max=16.56% min=-31.57%

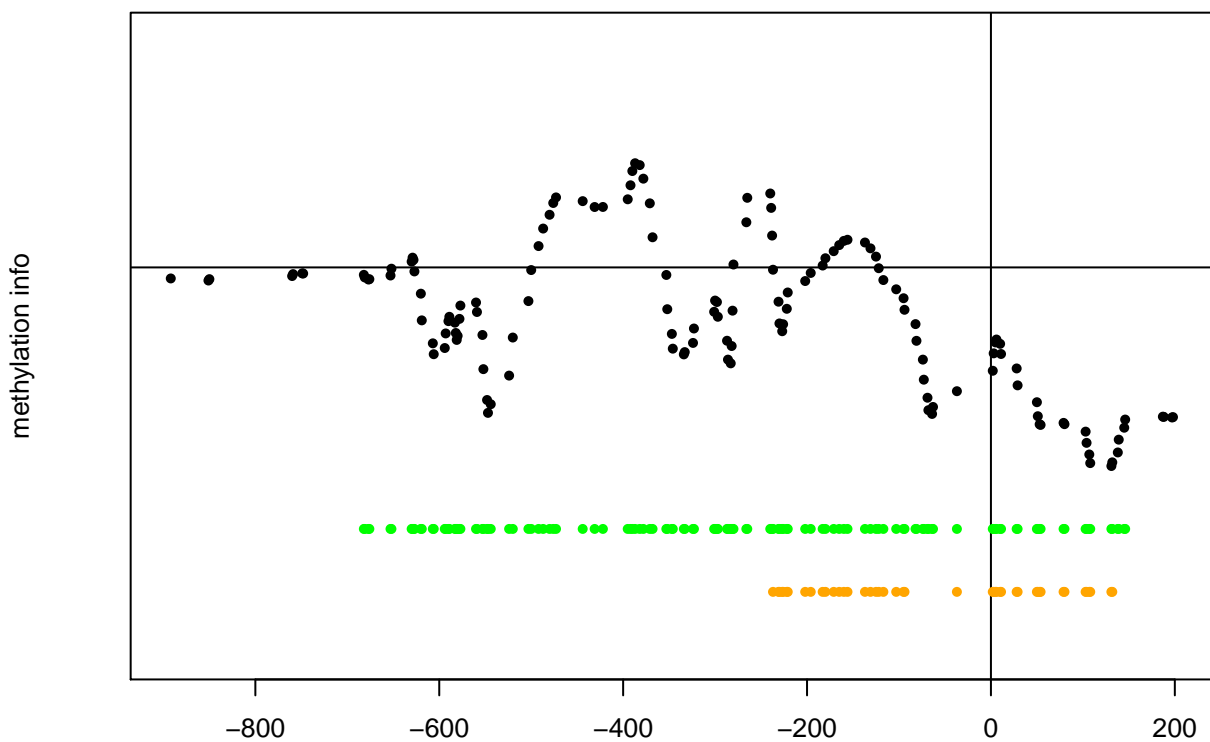

USP6 raw %methylation, red=UC, blue=Normal

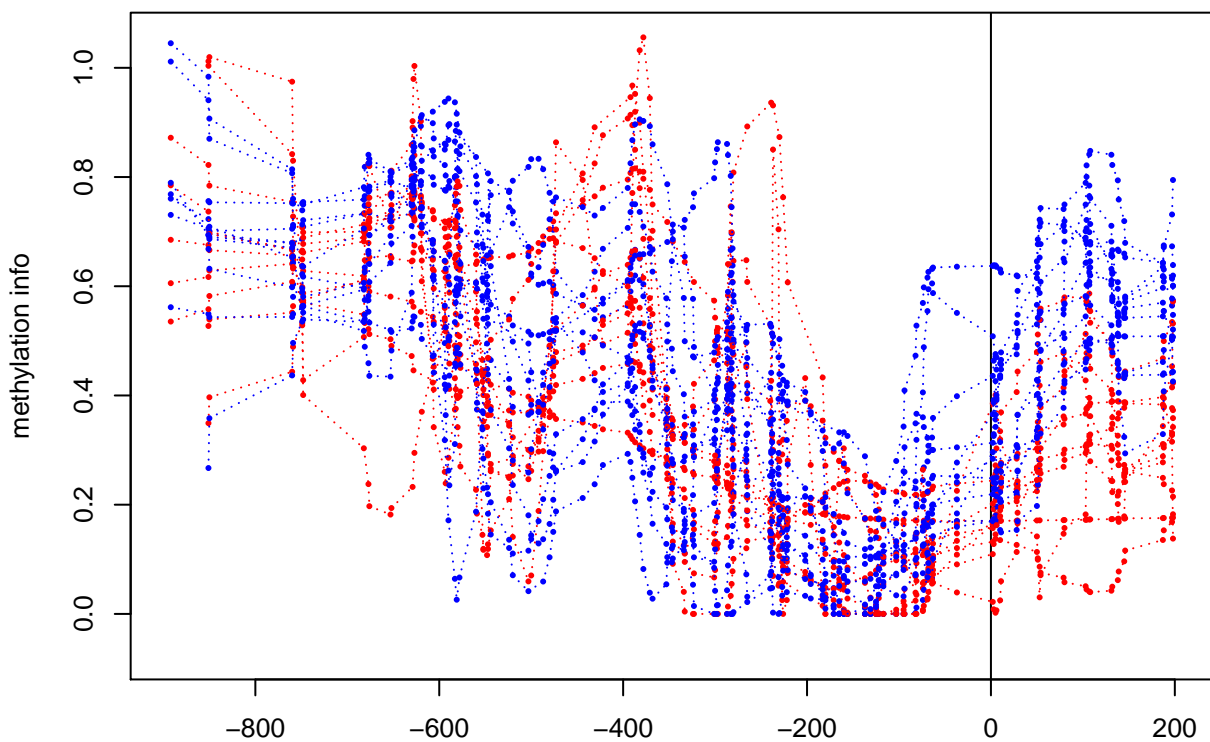

RNAseq logFC(UC-N)= 1.01

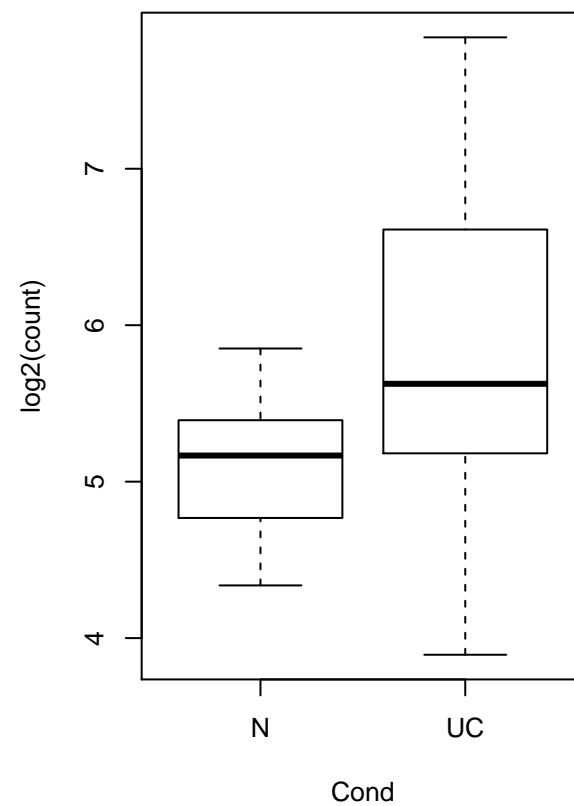

VNN1 average UC-N %methylation max=2.92% min=-16.8%

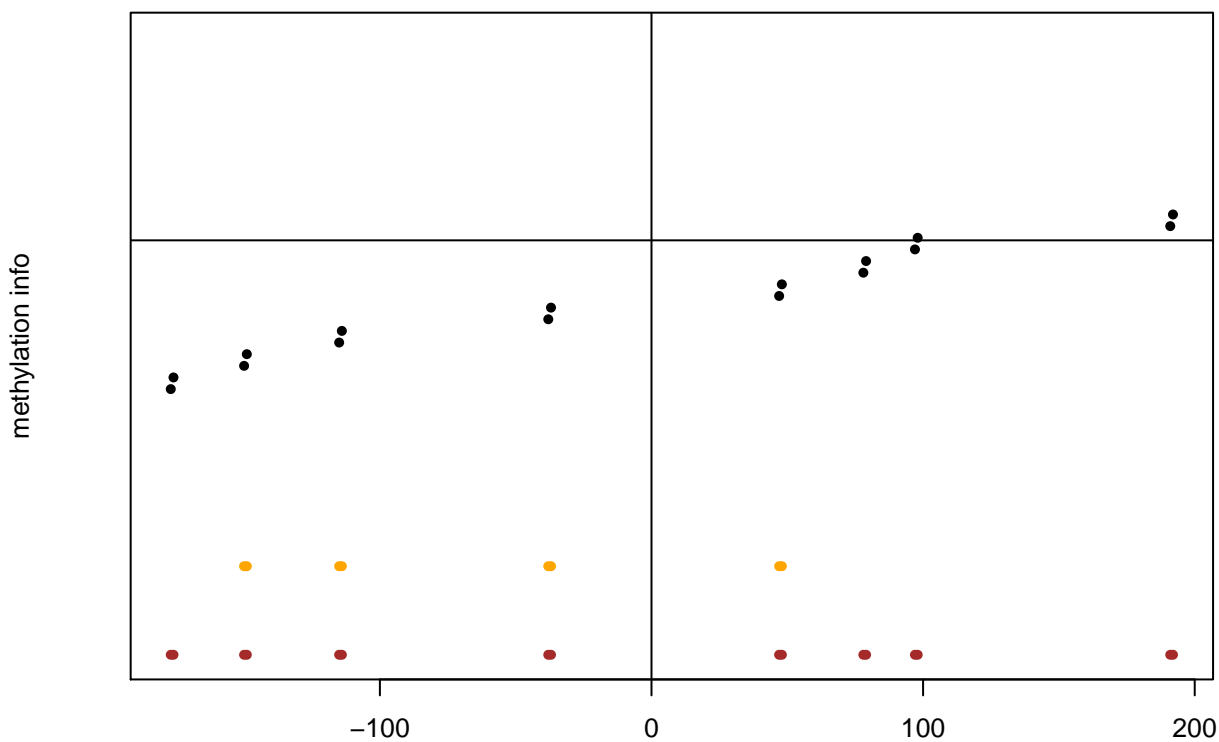

VNN1 raw %methylation, red=UC, blue=Normal

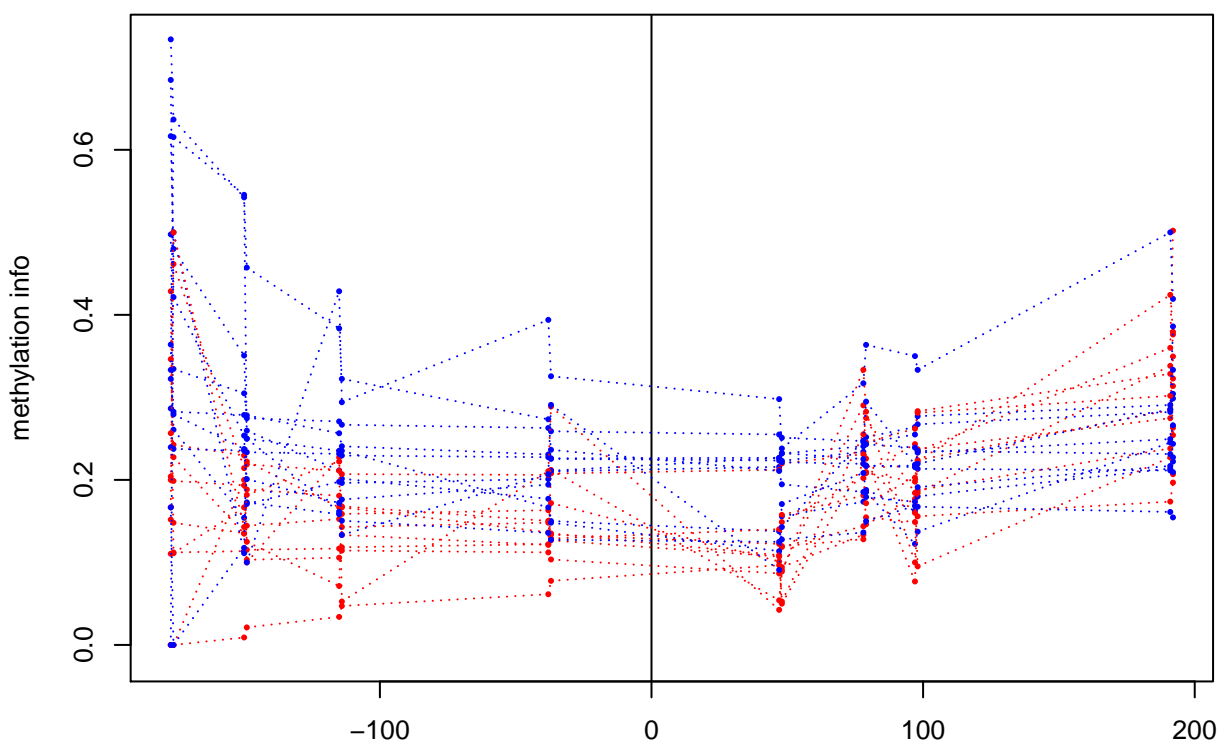

RNAseq logFC(UC-N)= 2.54

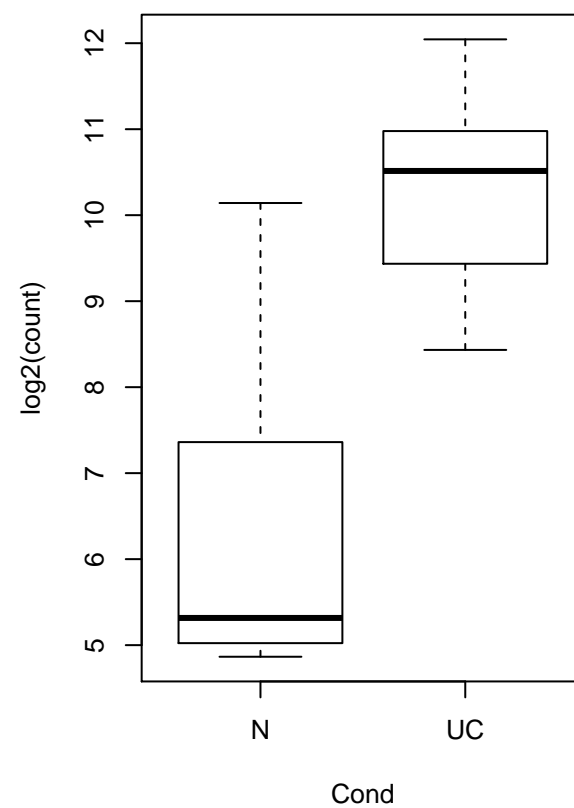

VWA1 average UC-N %methylation max=-3.95% min=-37.25%

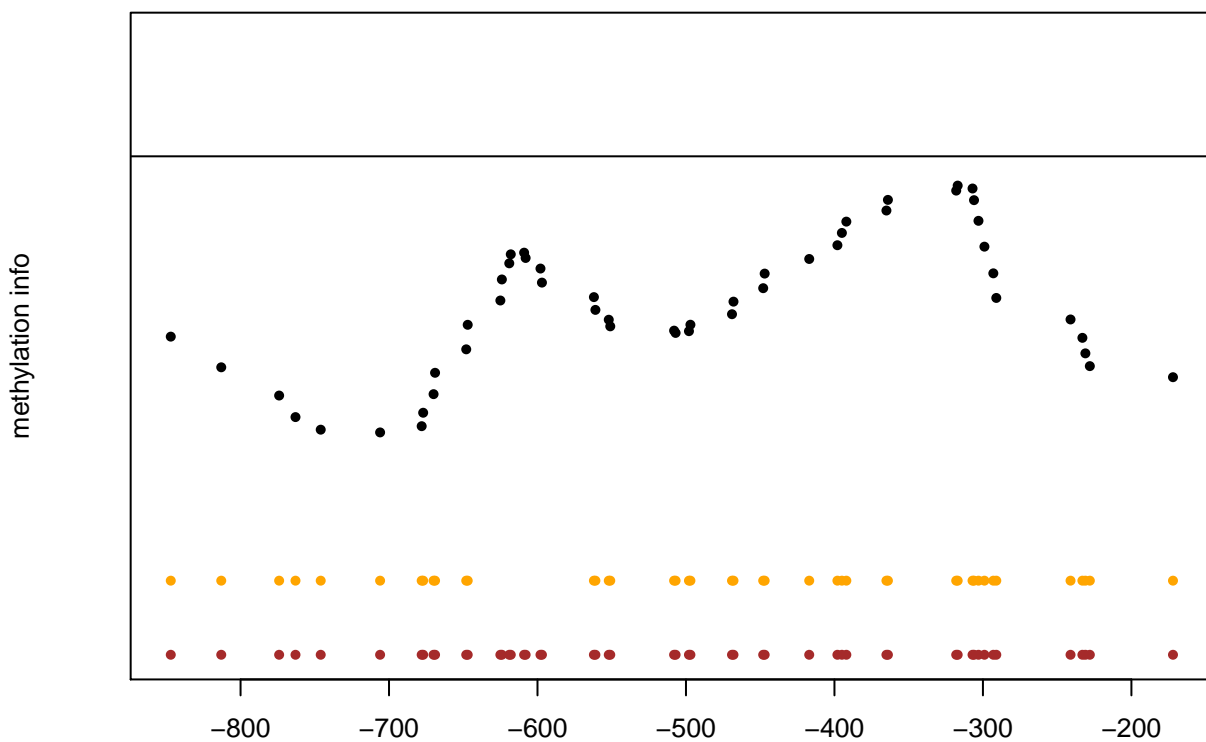

VWA1 raw %methylation, red=UC, blue=Normal

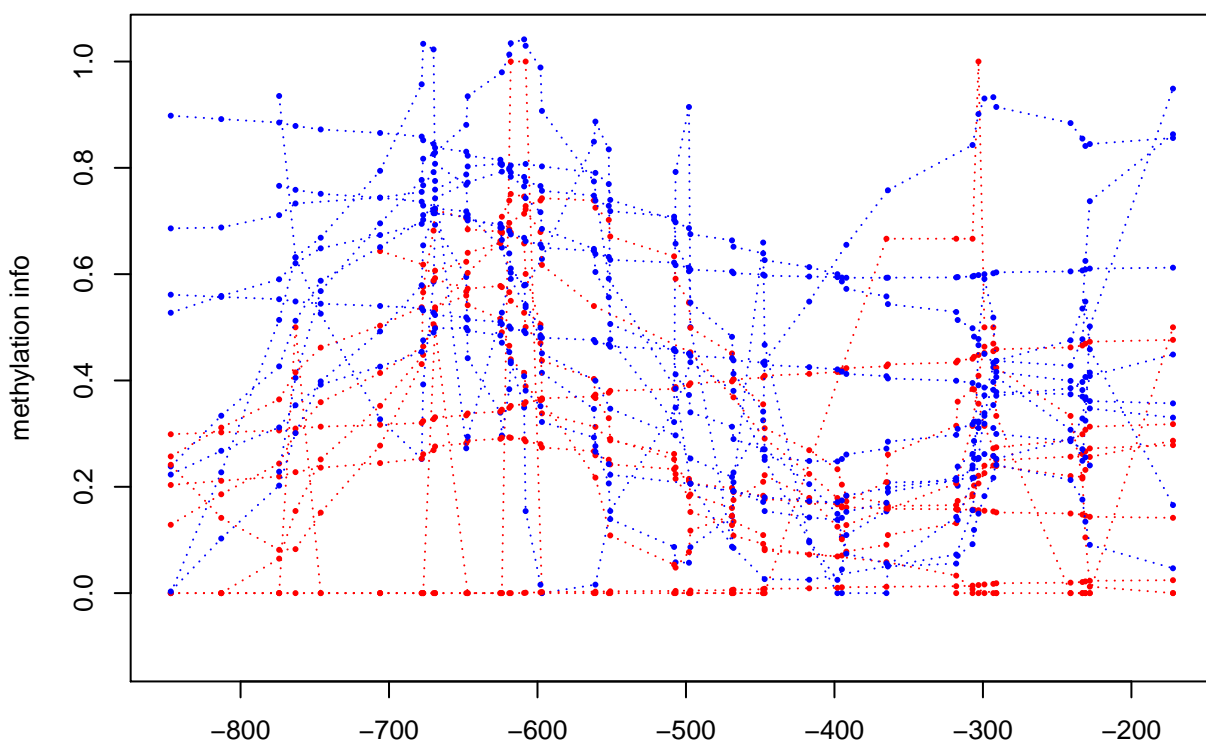

RNAseq logFC(UC-N)= 1.02

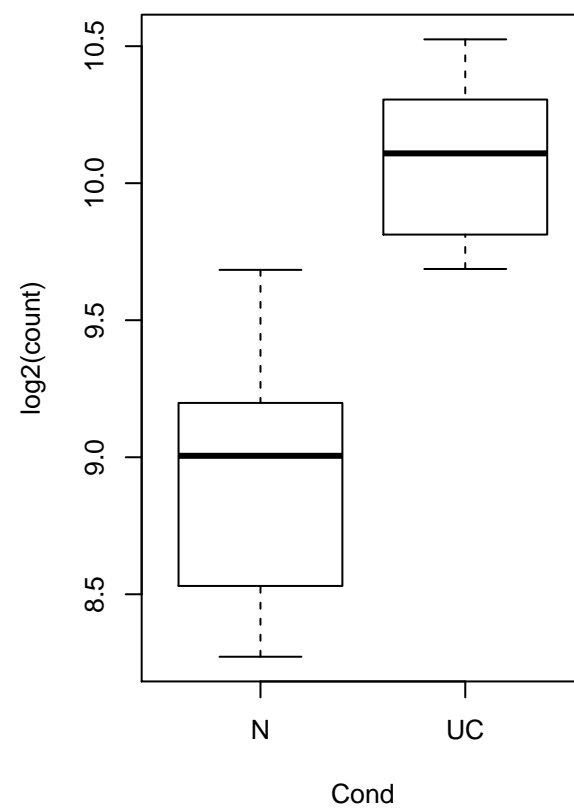

WDFY4 average UC-N %methylation max=-14.38% min=-40.51%

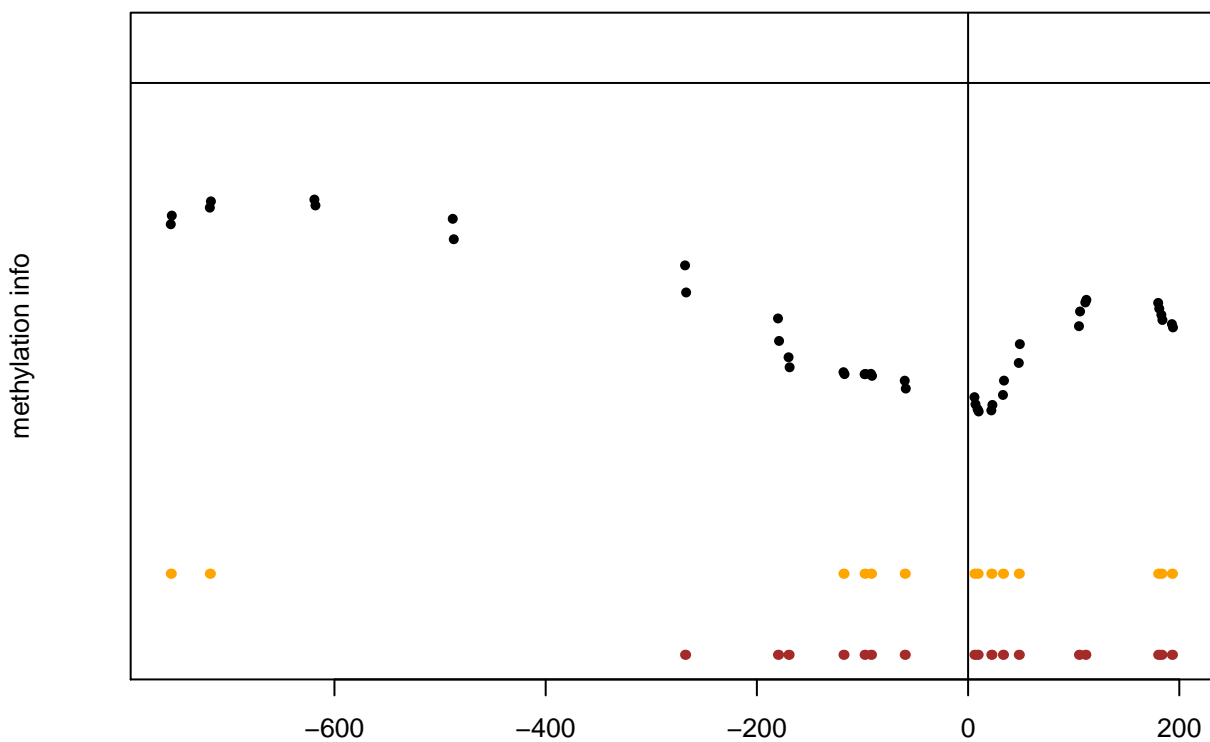

WDFY4 raw %methylation, red=UC, blue=Normal

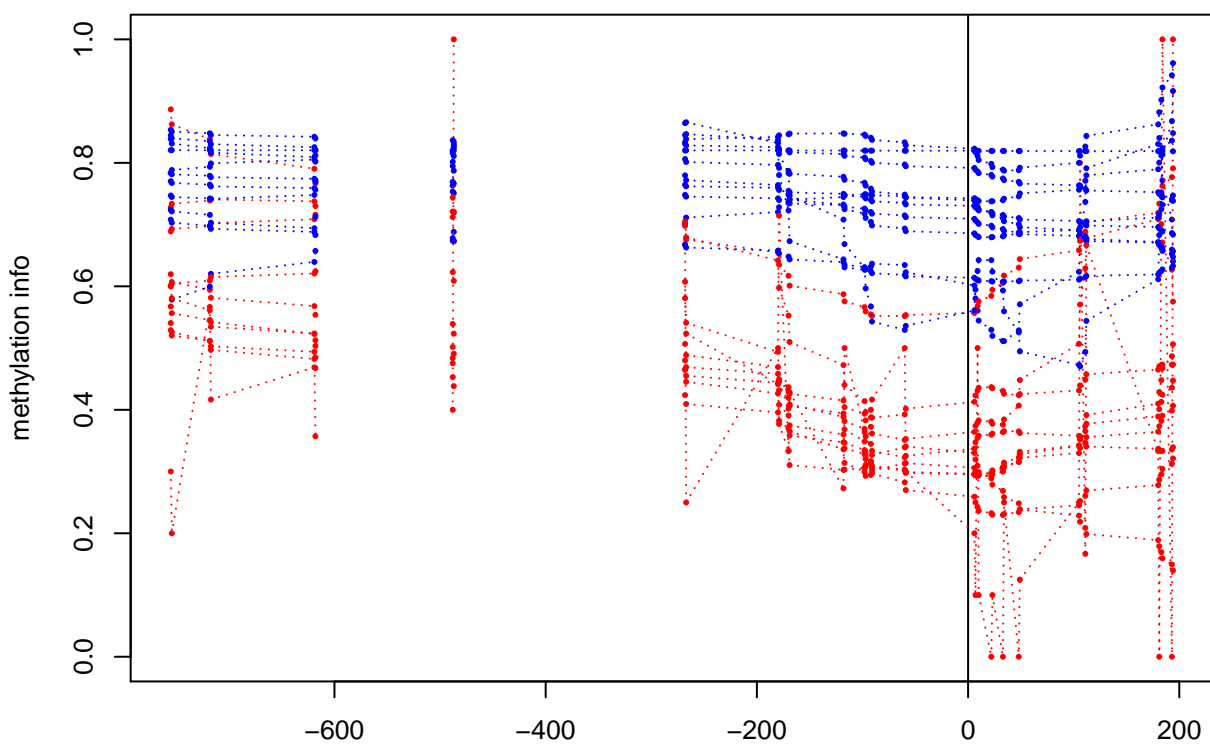

RNAseq logFC(UC-N)= 1.45

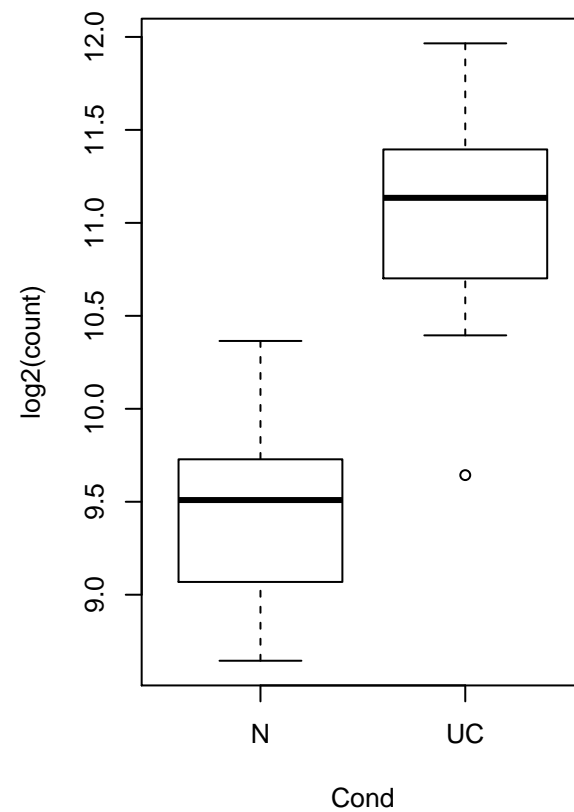

XKR9 average UC-N %methylation max=6.37% min=-2.4%

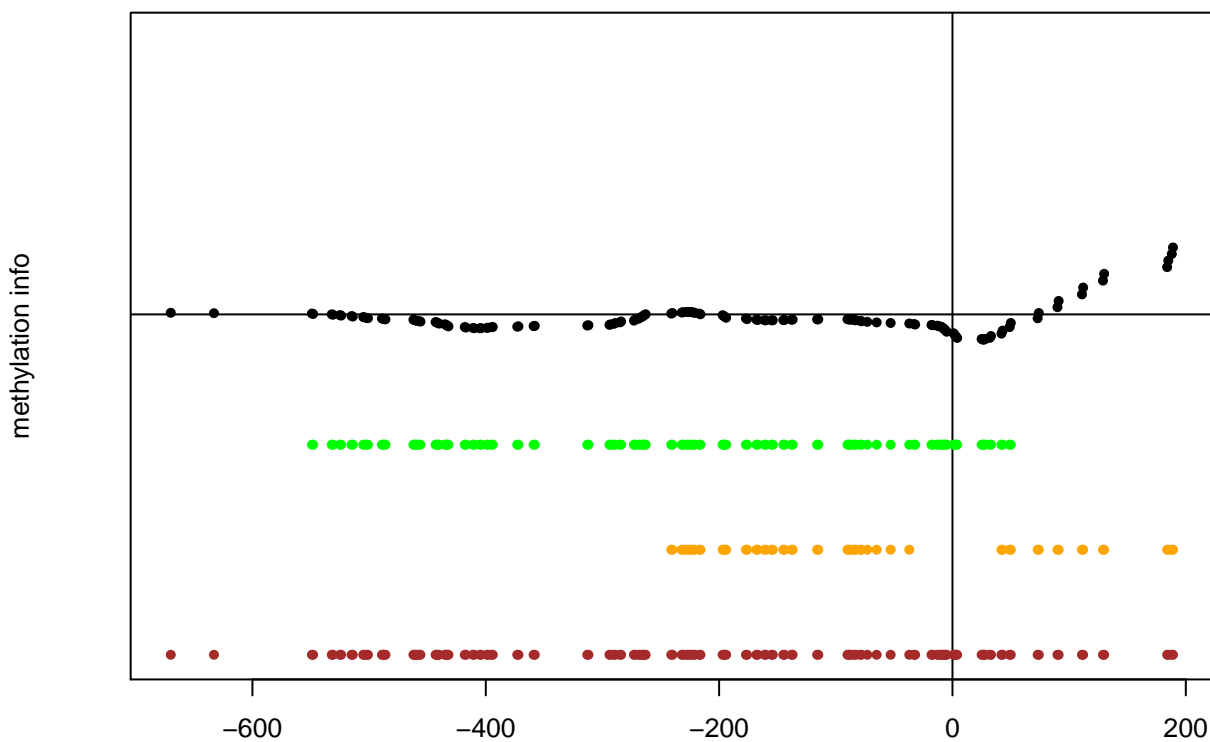

XKR9 raw %methylation, red=UC, blue=Normal

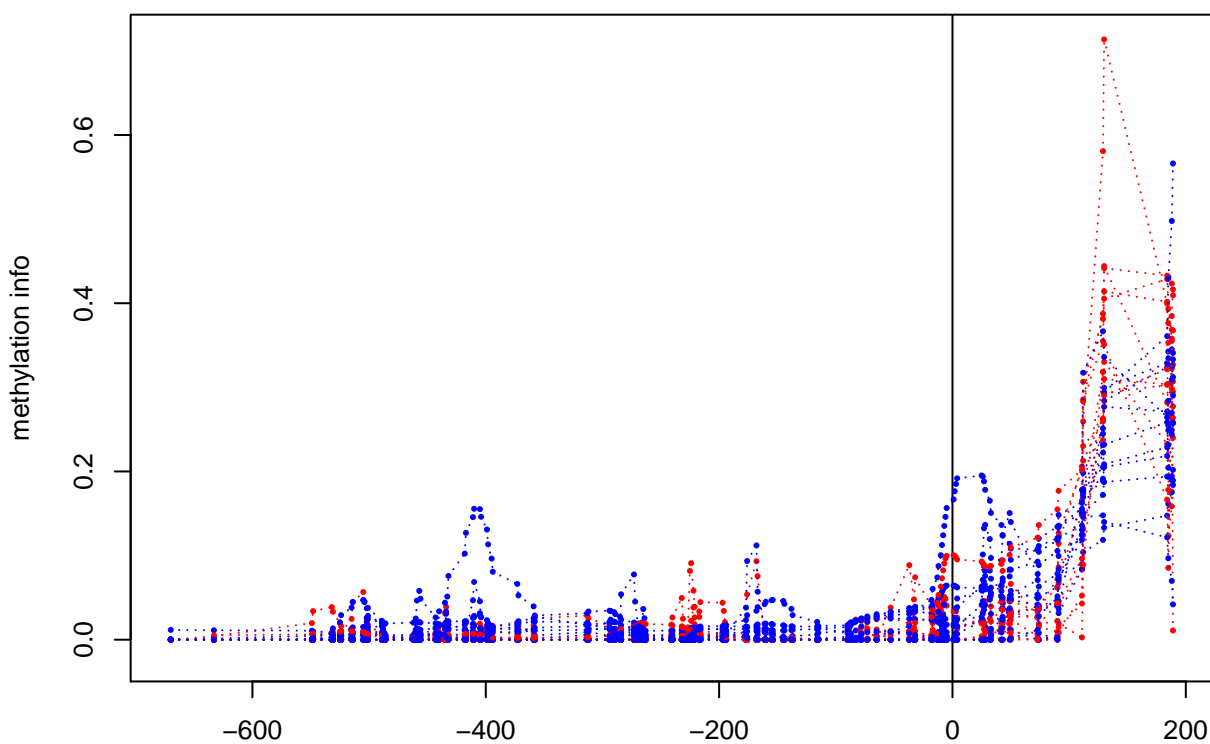

RNAseq logFC(UC-N)= 1.45

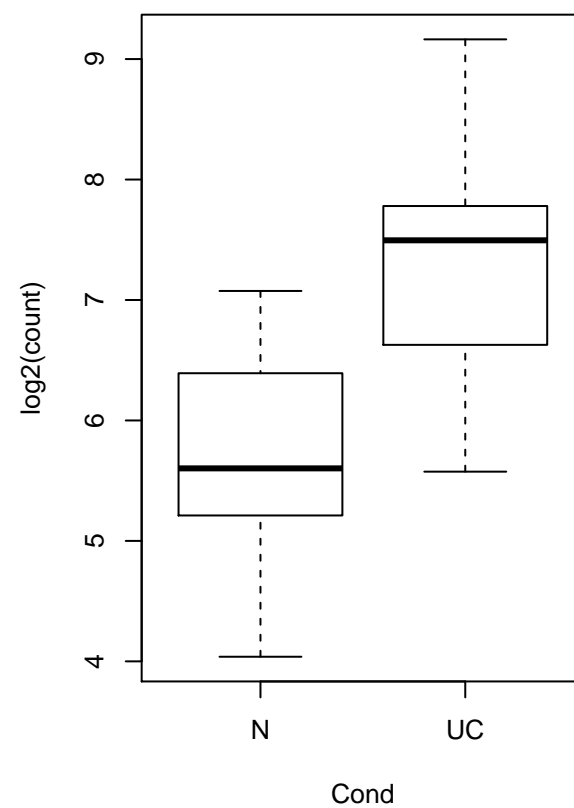



ZAP70 average UC-N %methylation max=2.75% min=-28.16%

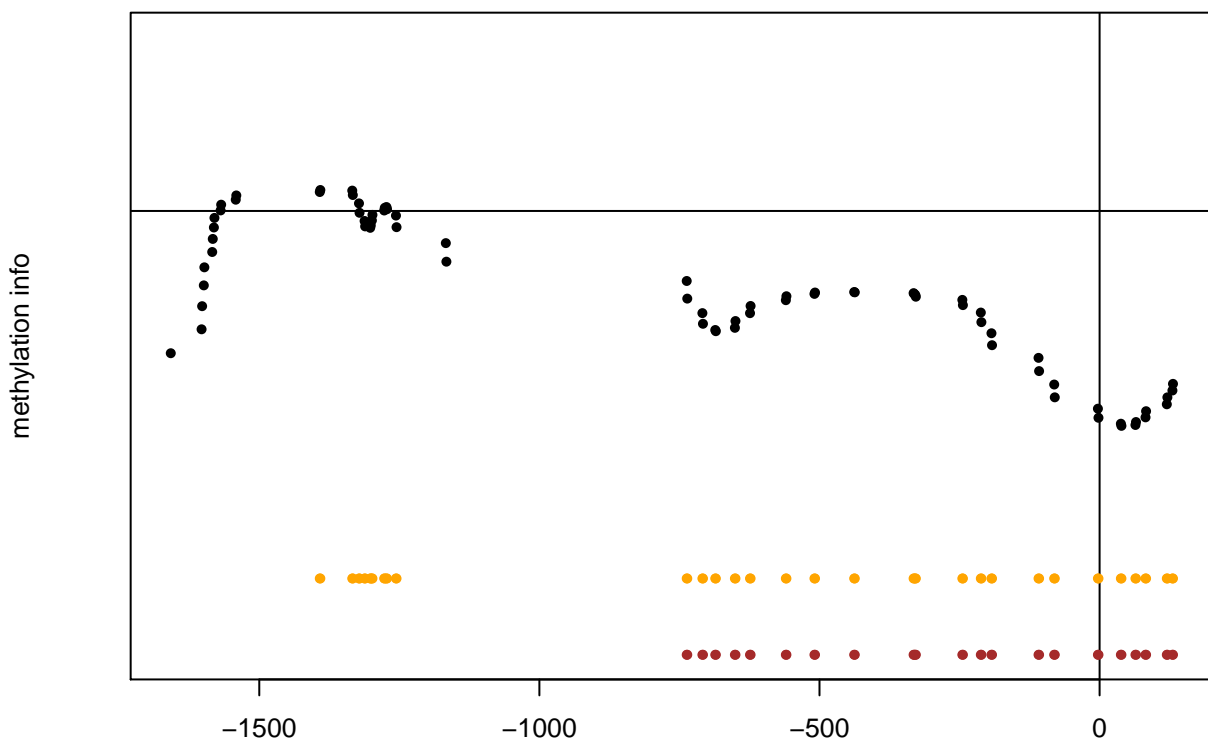

ZAP70 raw %methylation, red=UC, blue=Normal

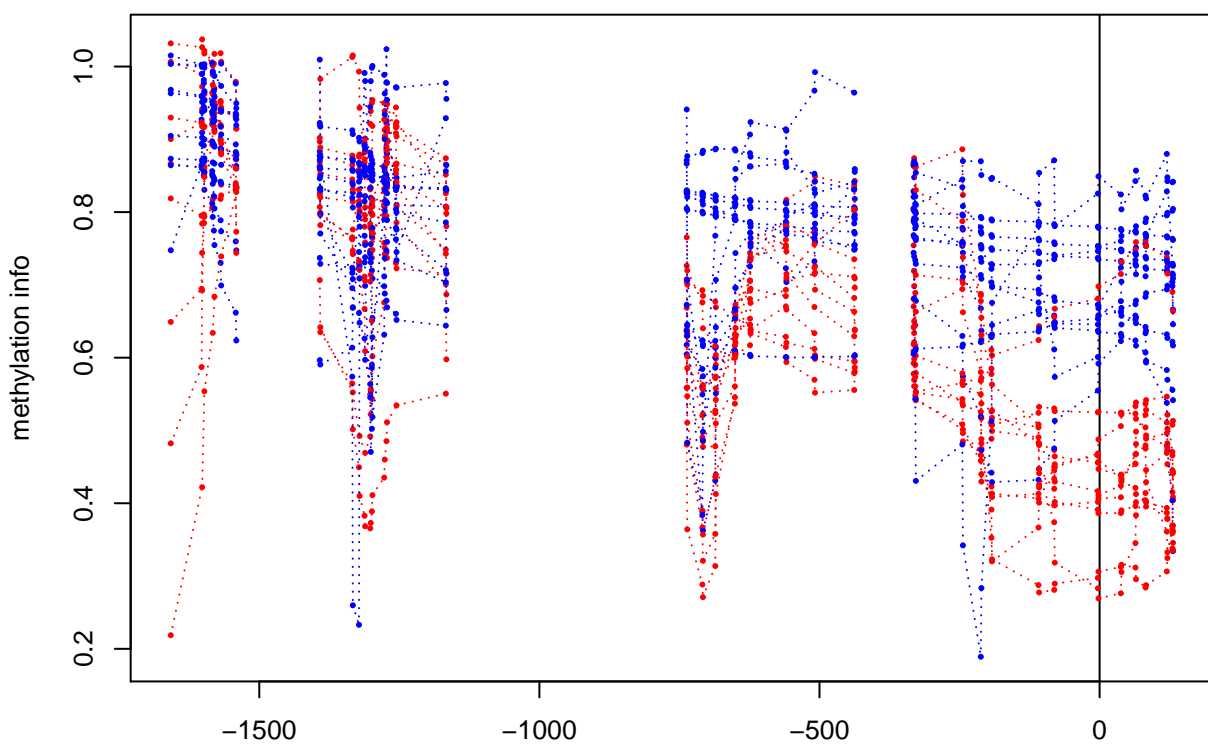

RNAseq logFC(UC-N)= 1.49

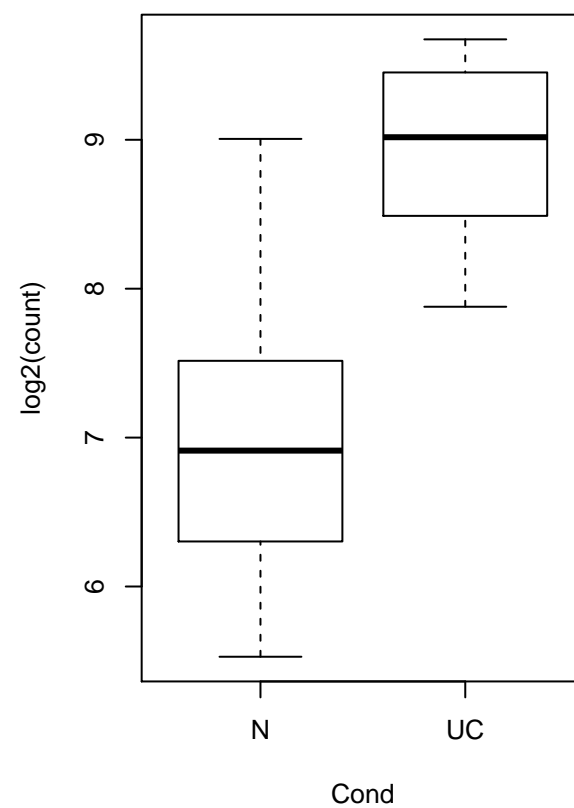

ZC3H12A average UC-N %methylation max=-1.3% min=-41.73%

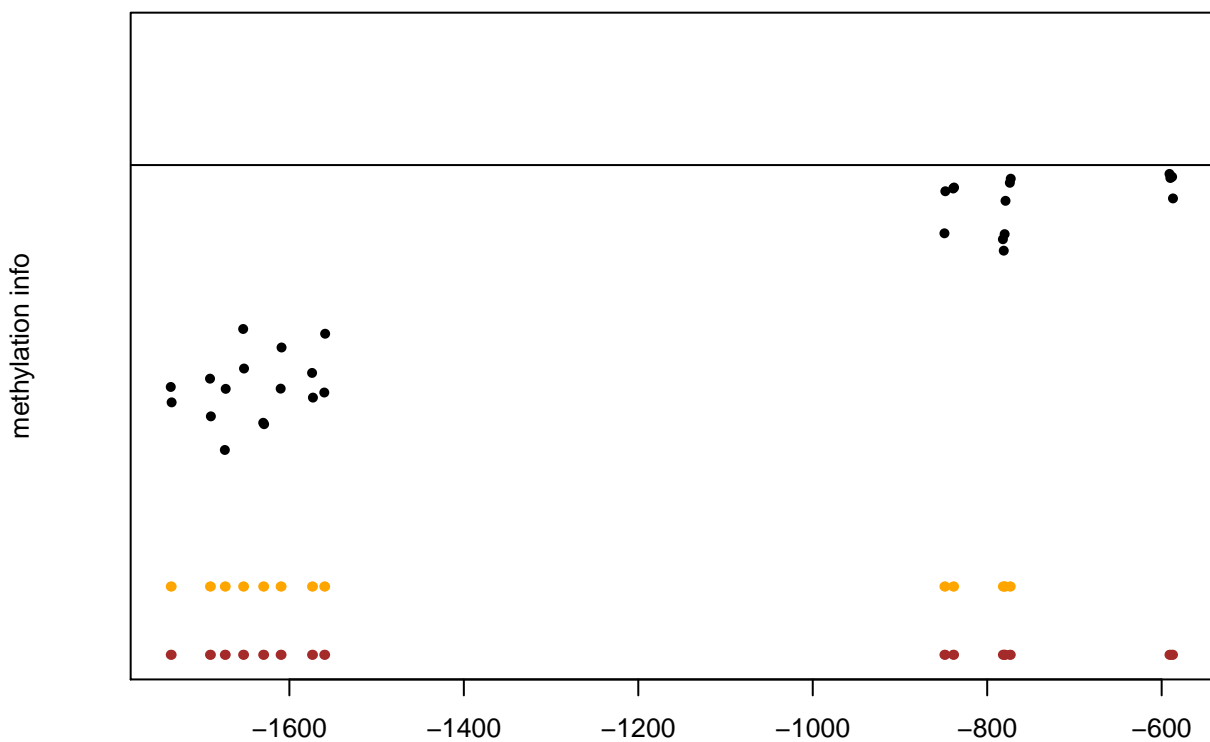

ZC3H12A raw %methylation, red=UC, blue=Normal

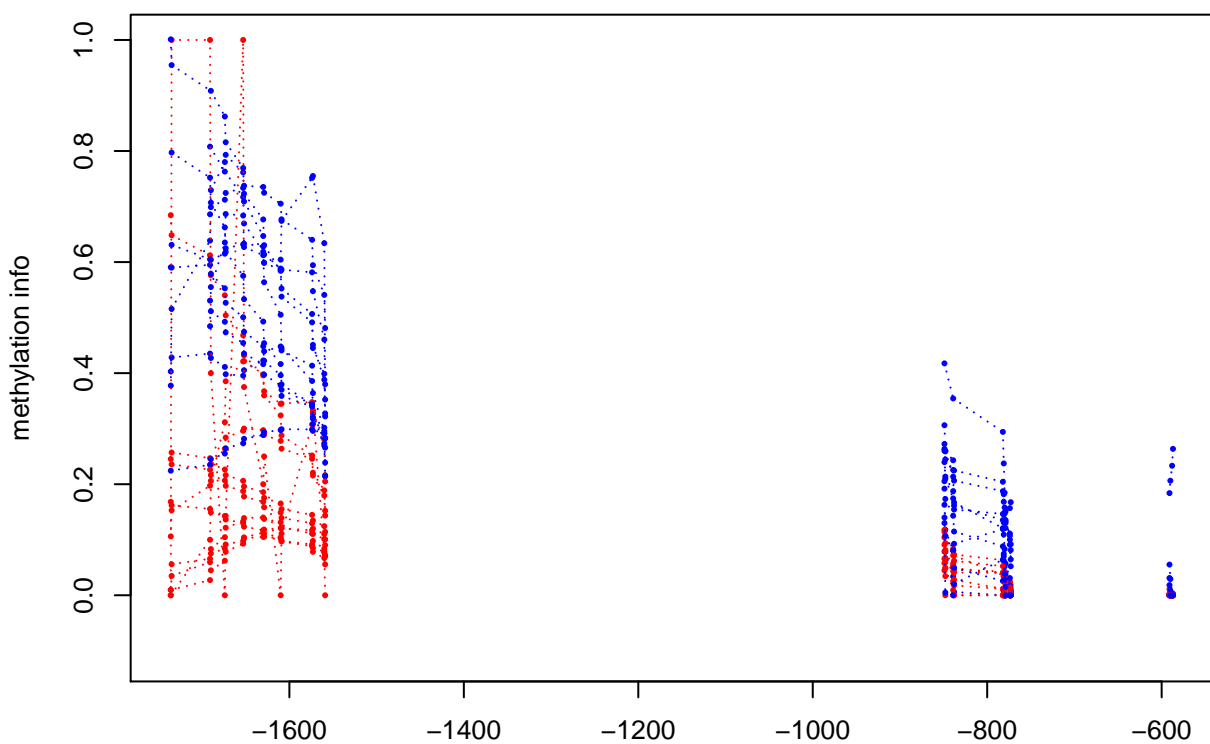

RNAseq logFC(UC-N)= 2.19

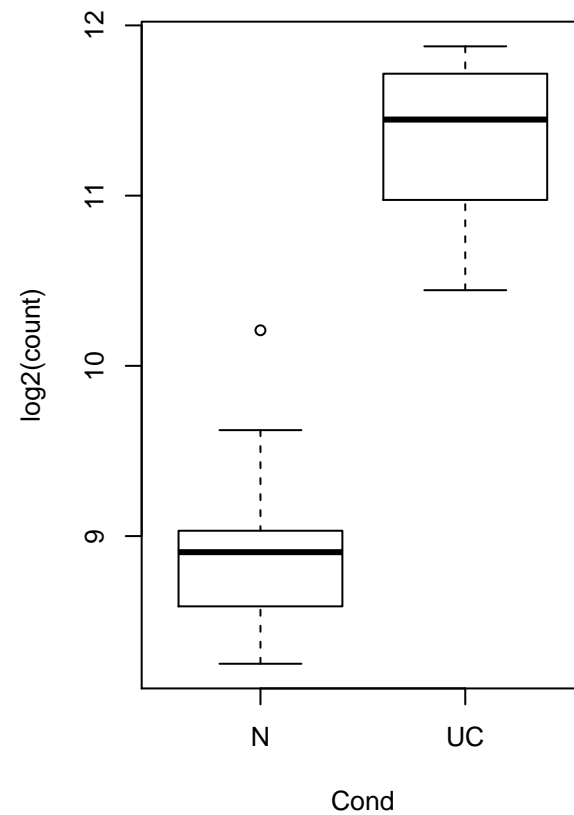

ZNF704 average UC-N %methylation max=20.12% min=-0.24%

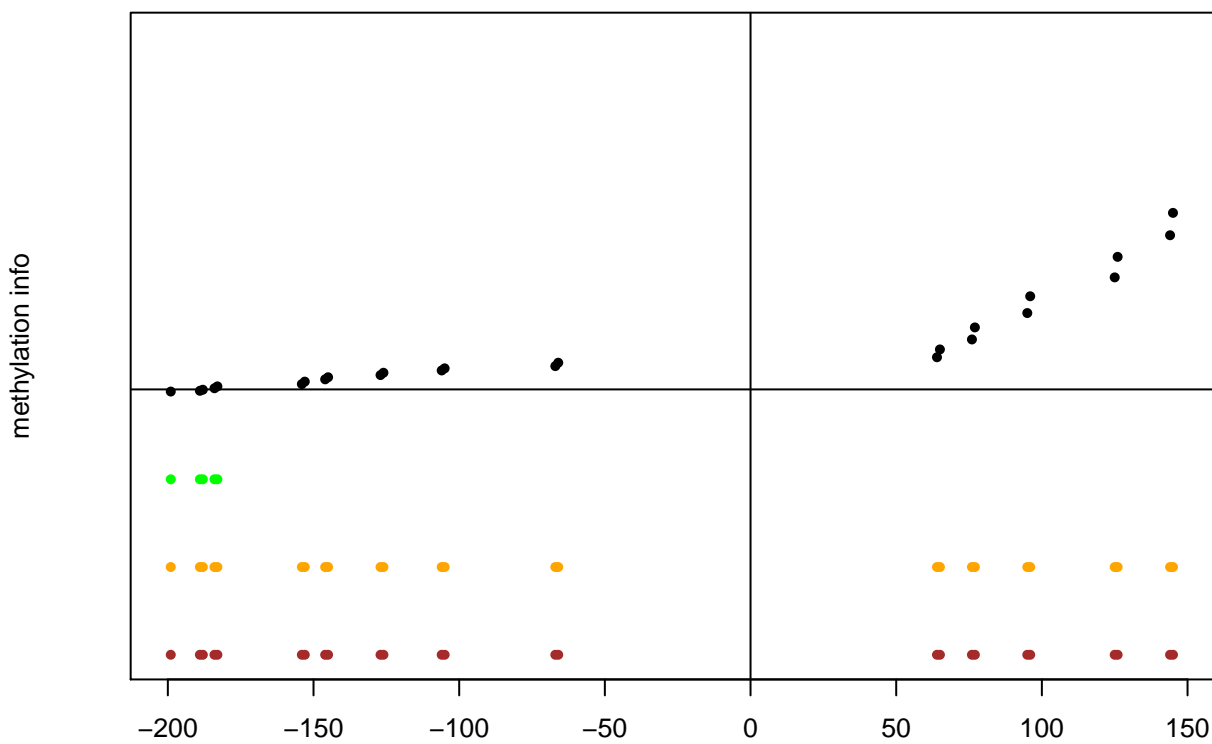

ZNF704 raw %methylation, red=UC, blue=Normal

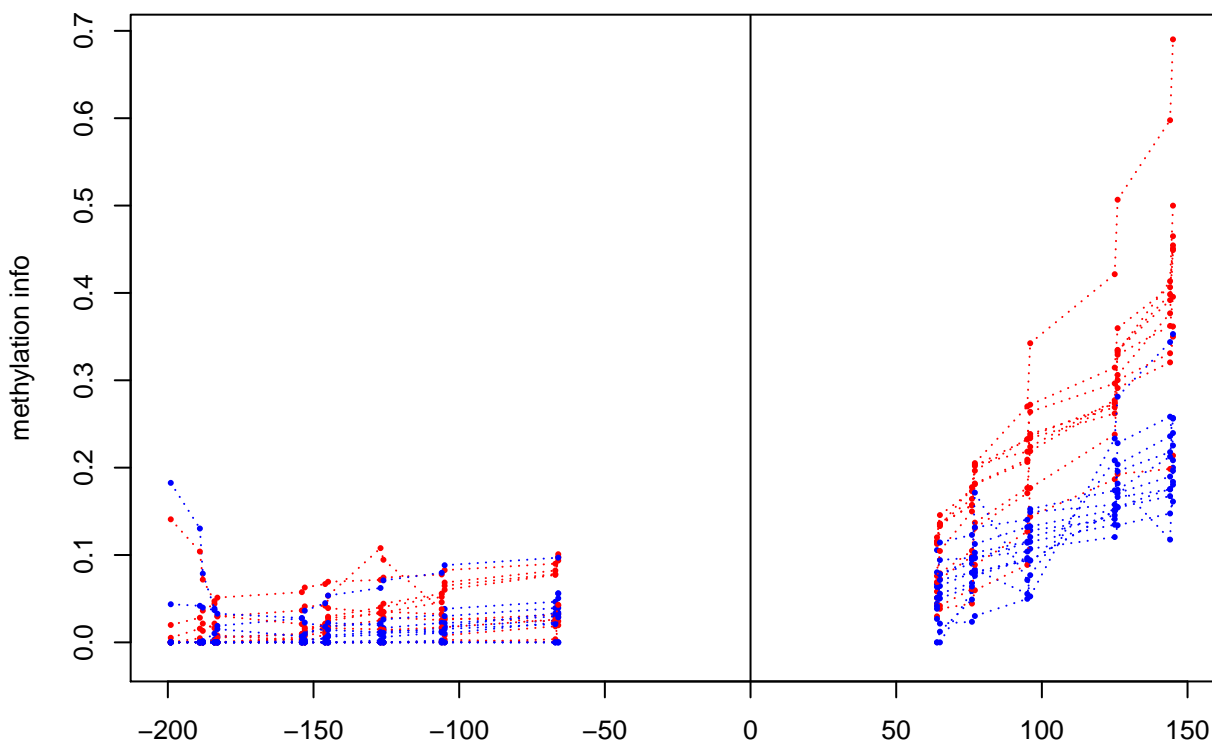

RNAseq logFC(UC-N)= -1

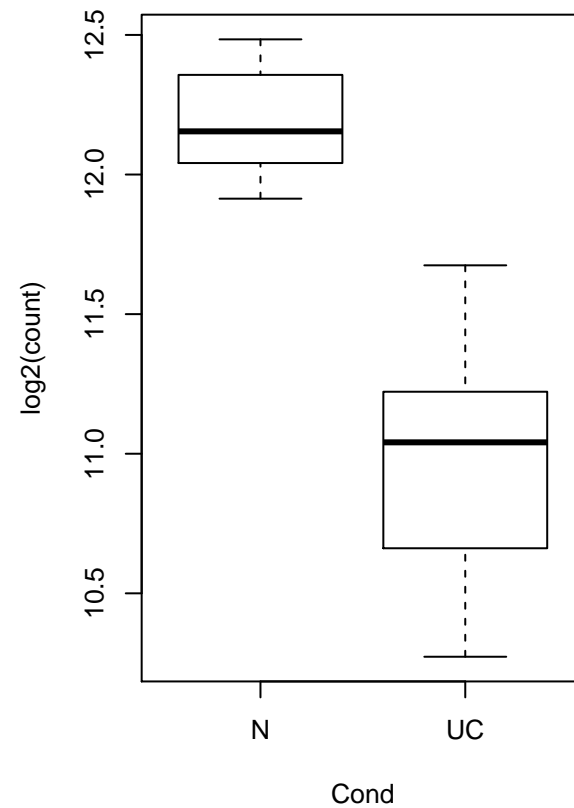

Supplement: jjy117_suppl_supplementary_data_3.pdf [file jjy117_suppl_supplementary_data_3.pdf]
