# Supplementary material for: Genome-wide DNA Methylation in Treatment-naïve Ulcerative Colitis
Source: PubMed Central journal article supplement — J Crohns Colitis. 2018 Aug 22;12(11):1338–47. doi: 10.1093/ecco-jcc/jjy117 (PMC6236200; doi:10.1093/ecco-jcc/jjy117), 2018-08-22

**Supplemental Data 5:** Overlay of methylation PCA sample scores on to the cell deconvolution biplot using the procrustes algorithm.

The bold black arrows and the large blue/red dots show the relationship (PCA biplot) between the samples and cell types of the transcriptomic cell deconvolution. The small red/blue dots are the methylation PCA results, and the dotted lines connect the transcriptome sample with the corresponding methylation sample. The distance moved between the samples is much less than expected by chance.

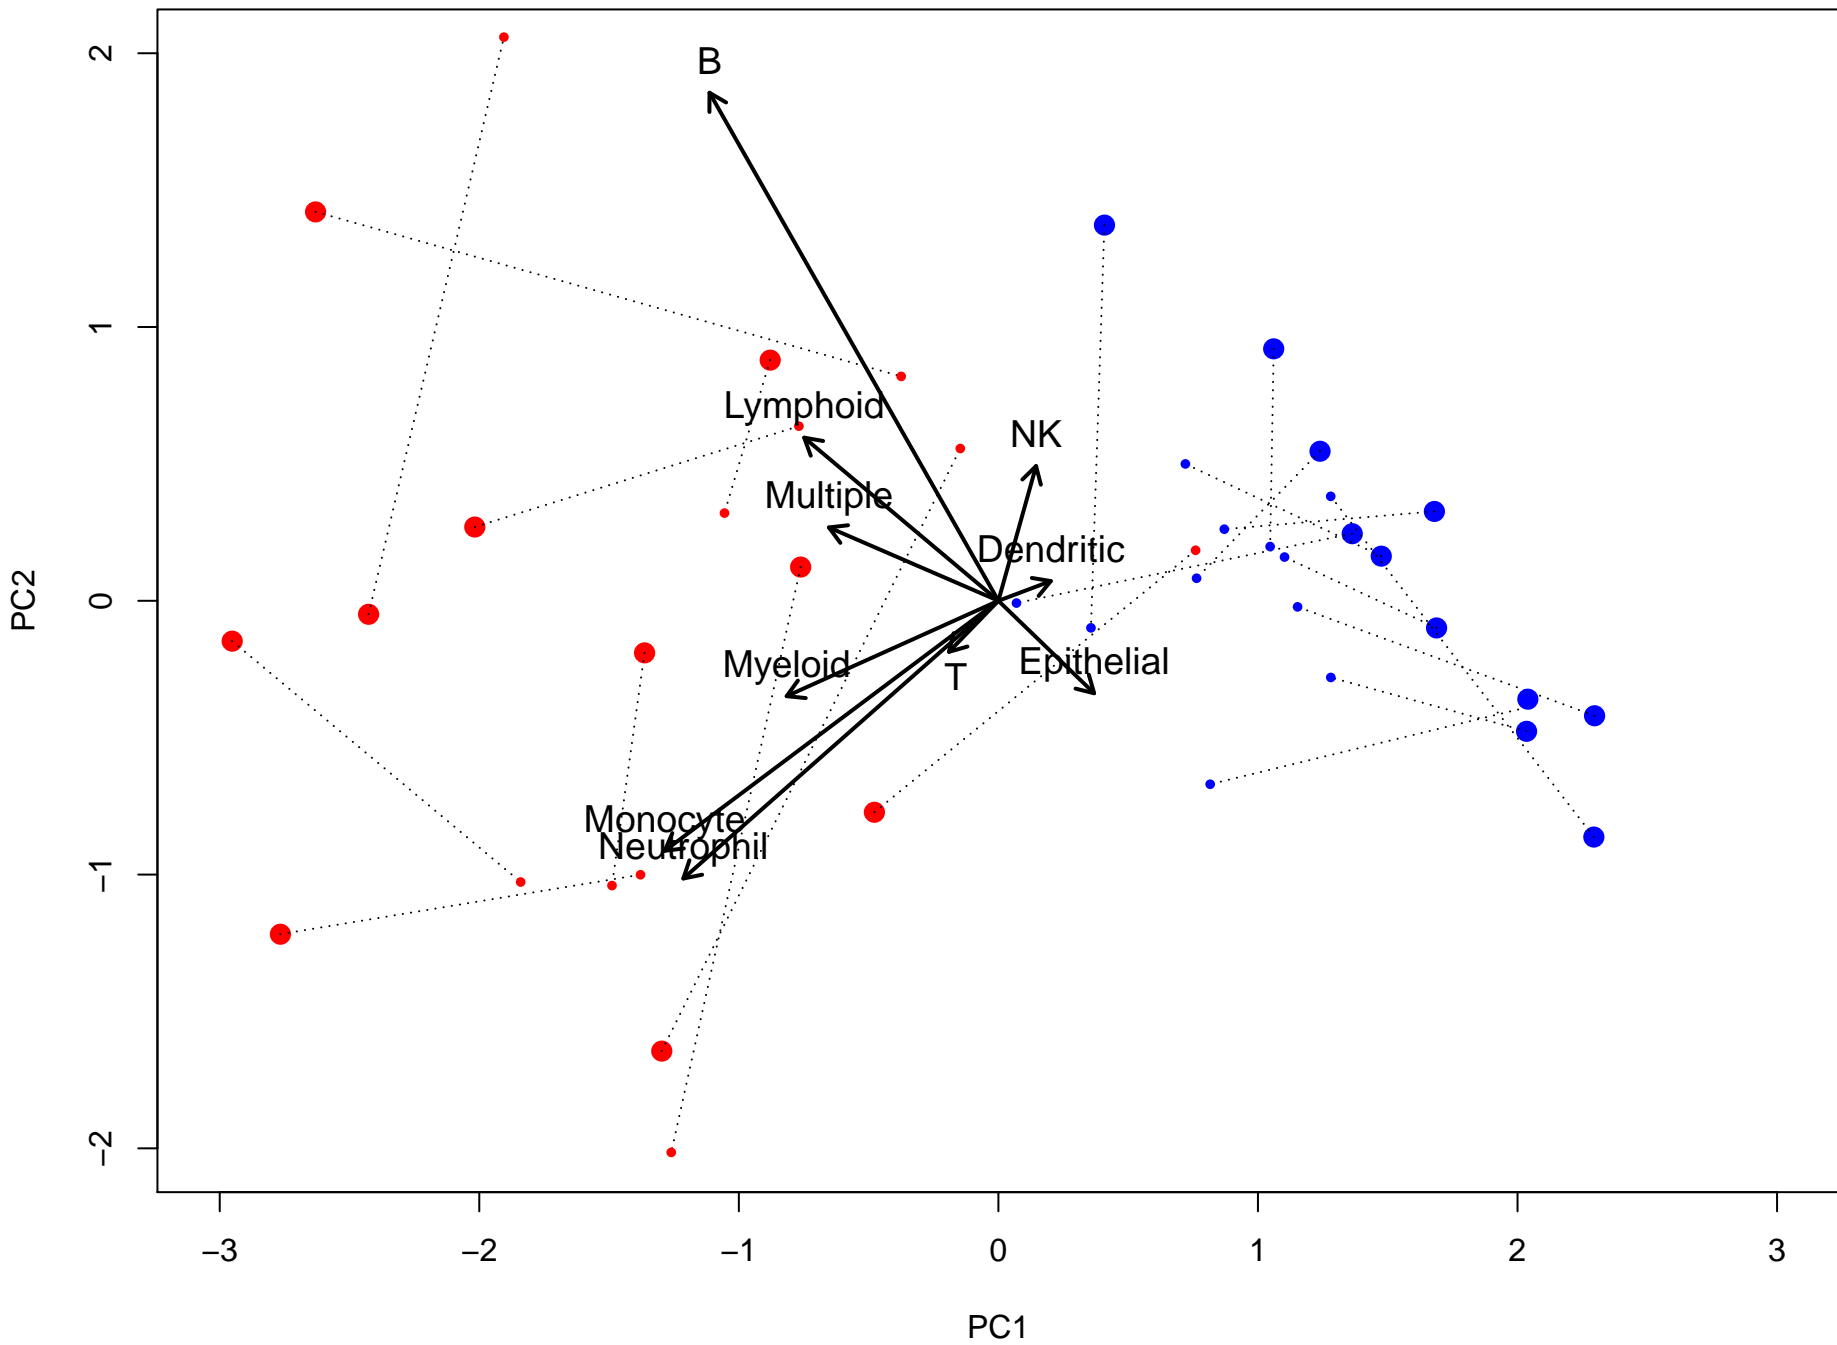

Supplement: jjy117_suppl_supplementary_data_5.pdf [file jjy117_suppl_supplementary_data_5.pdf]
