# Supplementary material for: Genome-wide DNA Methylation in Treatment-naïve Ulcerative Colitis
Source: PubMed Central journal article supplement — J Crohns Colitis. 2018 Aug 22;12(11):1338–47. doi: 10.1093/ecco-jcc/jjy117 (PMC6236200; doi:10.1093/ecco-jcc/jjy117), 2018-08-22
Supplement: jjy117_suppl_supplementary_data_6.pdf [file jjy117_suppl_supplementary_data_6.pdf]

**Supplementary Data 6:** Degree of overlap of gene lists from this study and previous microarray technology based DNA methylation studies.

|                          | Overlap p-values ---     |                       |                      |                   |
|--------------------------|--------------------------|-----------------------|----------------------|-------------------|
|                          | >                        |                       |                      |                   |
|                          | McDermott et al.<br>2016 | Häsler et al.<br>2012 | Cooke et al.<br>2012 | Taman et al. 2018 |
| McDermott et al.<br>2016 | 840                      | 0.096                 | 5.00E-26             | 1.00E-05          |
| Häsler et al. 2012       | 3                        | 44                    | 0.2                  | 0.001             |
| Cooke et al. 2012        | 152                      | 5                     | 2615                 | 5.00E-60          |
| Taman et al. 2018        | 24                       | 4                     | 138                  | 362               |

<-- Number of genes
