# Supplementary figures and images for: Genome-wide DNA Methylation in Treatment-naïve Ulcerative Colitis
Source: PubMed Central journal article supplement — J Crohns Colitis. 2018 Aug 22;12(11):1338–47. doi: 10.1093/ecco-jcc/jjy117 (PMC6236200; doi:10.1093/ecco-jcc/jjy117), 2018-08-22

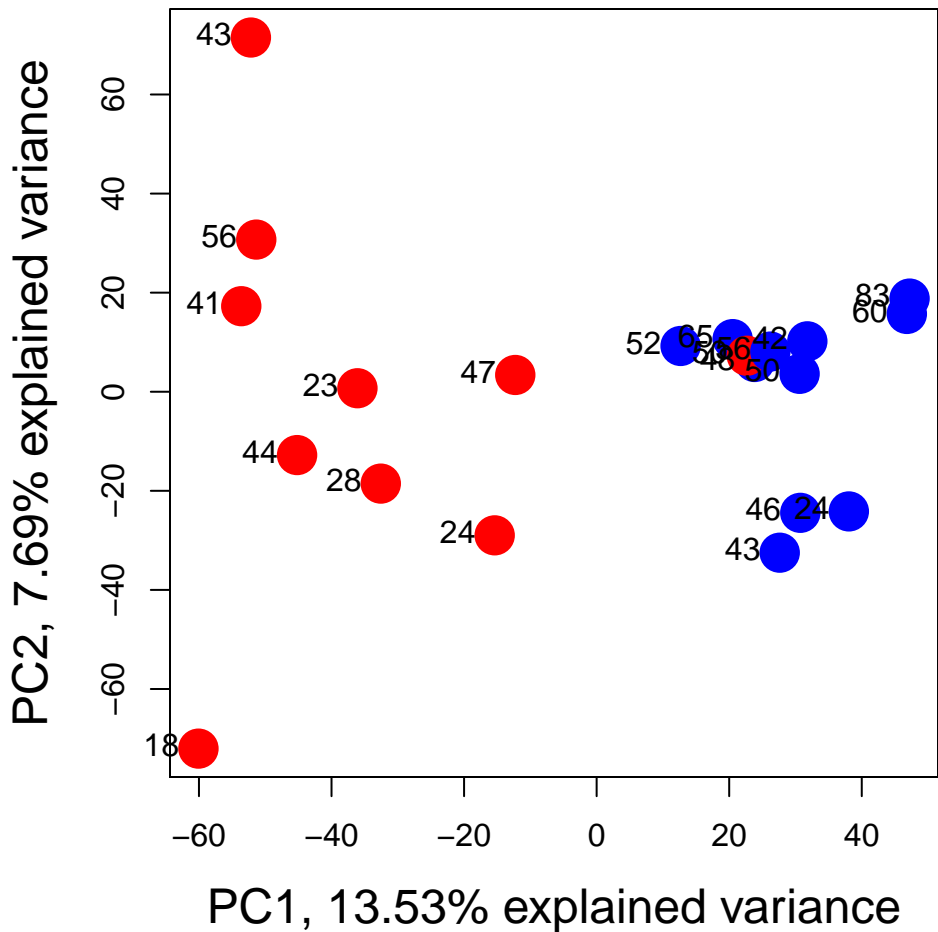

Supplement: jjy117_suppl_supplementary_data_1.pdf [file jjy117_suppl_supplementary_data_1.pdf]
